# Supplementary material
Source: publisher figshare collection journal article supplement (https://acs.figshare.com/ndownloader/files/25535353)
Supplement: Supplementary file 1 [file 25535353]

# *Supporting Information*

## **Nickel-Catalyzed Directed Cross-Electrophile Coupling of Phenolic Esters with Alkyl Bromides**

Feiyan Yang,<sup>a</sup> Decai Ding,<sup>a</sup> Chuan Wang<sup>a,b,\*</sup>

<sup>a</sup> Hefei National Laboratory for Physical Science at the Microscale, Department of Chemistry, Center for Excellence in Molecular Synthesis, University of Science and Technology of China, 96 Jinzhai Road, Hefei, Anhui 230026 (P. R. China).

<sup>b</sup> Center for Excellence in Molecular Synthesis of CAS, 96 Jinzhai Road, Hefei, Anhui 230026 (P. R. China).

### *Table of Contents*

|                                                                                                                       |    |
|-----------------------------------------------------------------------------------------------------------------------|----|
| General Methods and Materials.....                                                                                    | 2  |
| Preparation of Phenolic Esters.....                                                                                   | 3  |
| Preparation of Alkyl Bromides .....                                                                                   | 8  |
| General Procedure for the Ni-Catalyzed Cross-coupling of Phenolic Esters with Alkyl Bromides.....                     | 9  |
| Analytical Data for the Products <b>3</b> and <b>5</b> .....                                                          | 10 |
| Derivatizations of the Products.....                                                                                  | 19 |
| 5 mmol-Scale Reaction of Ni-Catalyzed Cross-Coupling of Phenyl Salicylic Acid Ester with <i>n</i> -Octyl Bromide..... | 22 |
| Control Experiments.....                                                                                              | 23 |
| Radical Clock Experiment.....                                                                                         | 24 |
| References .....                                                                                                      | 26 |
| NMR-Spectra.....                                                                                                      | 28 |

## General Methods and Materials

$^1\text{H}$  NMR and  $^{13}\text{C}$  NMR spectra were recorded on a Bruker Advance 400M or 500M NMR spectrometers at ambient temperature in  $\text{CDCl}_3$  and  $\text{DMSO-d}_6$  at 400 and 101 MHz, or 500 and 126 MHz. The chemical shifts are given in ppm relative to tetramethylsilane [ $^1\text{H}$ : ( $\text{SiMe}_4$ ) = 0.00 ppm] as an internal standard or relative to the resonance of the solvent [ $^1\text{H}$ :  $\delta(\text{CDCl}_3)$  = 7.26,  $^{13}\text{C}$ :  $\delta(\text{CDCl}_3)$  = 77.16 ppm;  $^1\text{H}$ :  $\delta(\text{DMSO-d}_6)$  = 2.50,  $^{13}\text{C}$ :  $\delta(\text{DMSO-d}_6)$  = 39.52 ppm]. Multiplicities were given as: s (singlet); d (doublet); t (triplet); q (quartet); dd (doublet of doublets); dt (doublet of triplets); m (multiplets), etc. Coupling constants are reported as  $J$  values in Hz. High resolution mass spectral analysis (HRMS) was performed on Waters XEVO G2 Q-TOF using ESI technique. Flash chromatography was performed using 200-300 mesh silica gel with the indicated solvent system.

Unless otherwise noted, all the reagents and starting materials were purchased from commercial vendors and used without further purification.

## Preparation of Phenolic Esters

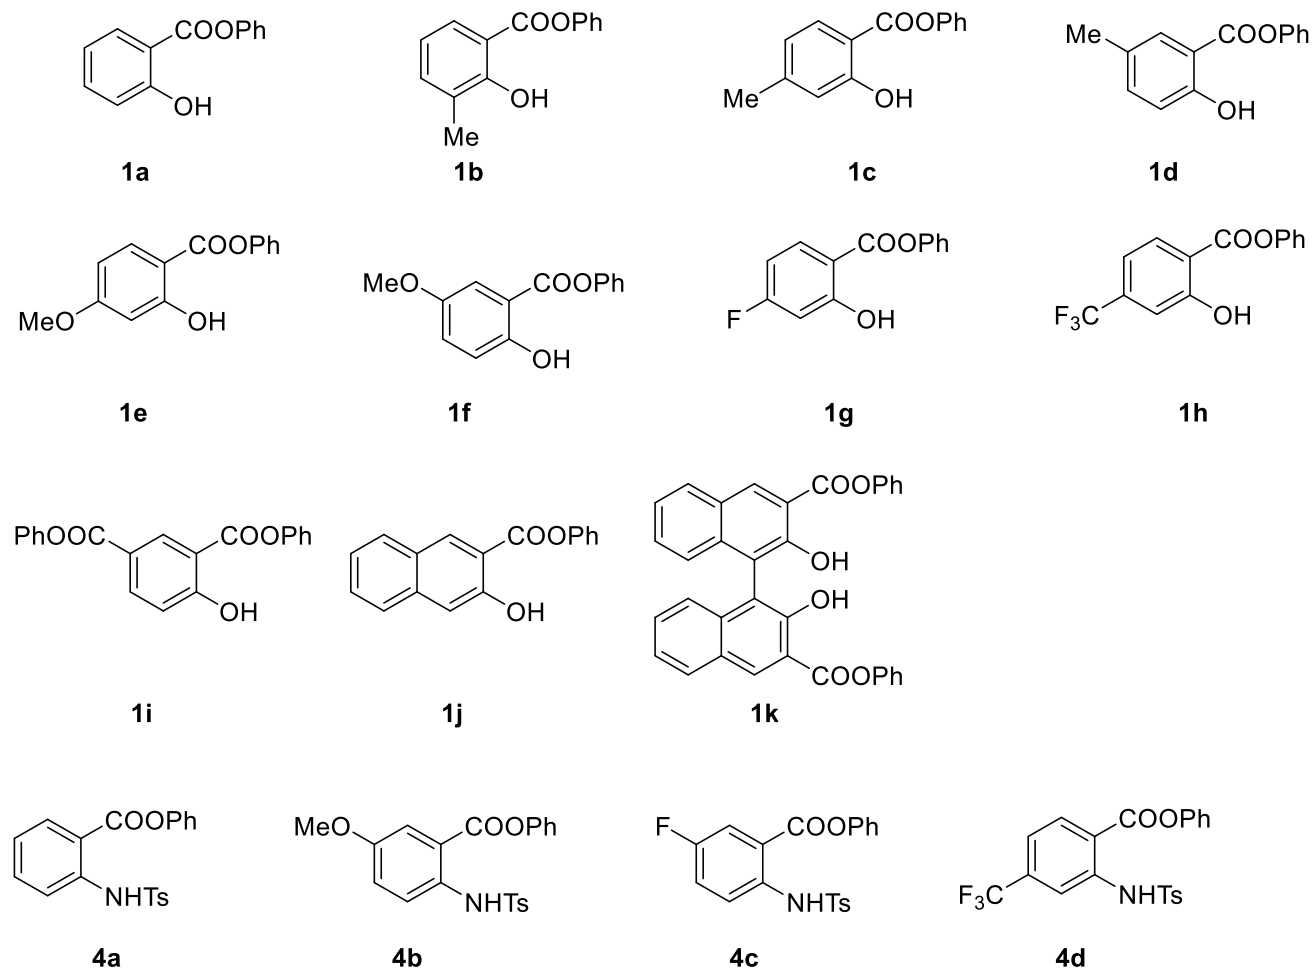

Compounds **1b~1h**<sup>1</sup> are known and their NMR-data are consistent with these reported in the literature.

## Preparation of Phenolic Ester 1i

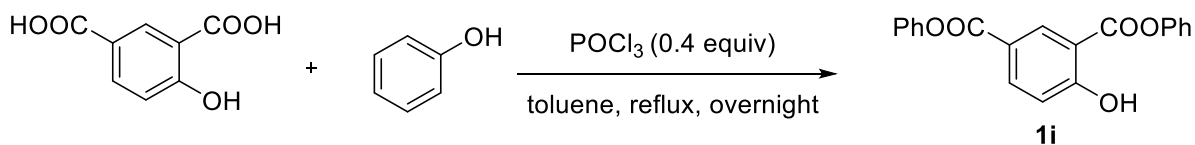

4-Hydroxyisophthalic acid (1.82 g, 10 mmol, 1 equiv) and phenol (9.41 g, 100 mmol, 10 equiv) were dissolved in 20 mL of toluene in a 100 mL round bottle. Phosphorus oxychloride (1.23 g, 0.75 mL, 8 mmol, 0.8 equiv) was added into the solution via syringe dropwise. After the reaction mixture was stirred under reflux (with oil bath at 110 °C) overnight, the mixture was allowed to cool to room temperature, transferred to a separatory funnel, and quenched with saturated aqueous sodium carbonate solution. The aqueous layer was then extracted with ethyl acetate. The organic layers were combined, dried over sodium sulfate, and concentrated in vacuo. The crude product was purified by column chromatography (petroleum ether/ethyl acetate=20:1) on silica gel to give *diphenyl 4-hydroxyisophthalate* (**1i**) as a white solid (1.94 g, 58 % yield). <sup>1</sup>H NMR (500 MHz, CDCl<sub>3</sub>) δ= 10.97 (s, 1H), 8.90 (d, *J*= 2.3 Hz, 1H), 8.28 (dd, *J*= 8.7, 2.3 Hz, 1H), 7.45-7.34 (m, 4H), 7.29-7.23 (m, 1H), 7.22-7.14 (m, 5H), 7.08 (d, *J*= 8.8 Hz, 1H) ppm; <sup>13</sup>C NMR (126 MHz, CDCl<sub>3</sub>) δ= 167.5, 165.1, 163.0, 149.8, 148.8, 136.8, 132.6, 128.7 (2C), 128.5 (2C), 125.7, 125.0, 120.7 (2C), 120.5 (2C), 120.1, 117.4, 110.9 ppm; HRMS (ESI): calcd. for

## Preparation of Phenolic Ester **1j**

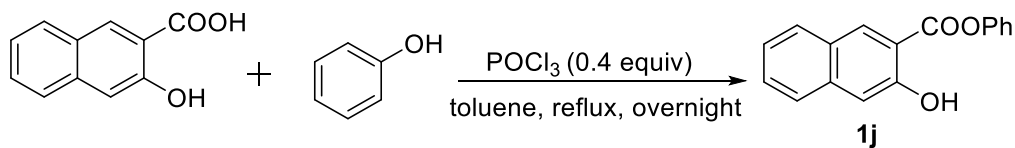

3-Hydroxy-2-naphthoic acid (1.88 g, 10 mmol, 1 equiv) and phenol (4.71 g, 50 mmol, 5 equiv) were dissolved in 20 mL of toluene in a 100 mL round bottle. Phosphorus oxychloride (0.61 g, 0.4 mL, 4 mmol, 0.4 equiv) was added into the solution via syringe dropwise. After the reaction mixture was stirred under reflux (with oil bath at 110 °C) overnight, the mixture was allowed to cool to room temperature, transferred to a separatory funnel, and quenched with saturated aqueous sodium carbonate solution. The aqueous layer was then extracted with ethyl acetate. The organic layers were combined, dried with sodium sulfate, and concentrated in vacuo. The crude product was purified by column chromatography (petroleum ether/ethyl acetate=10:1) on silica gel to give *phenyl 3-hydroxy-2-naphthoate* (**1j**) as a white solid (1.69 g, 64 % yield). <sup>1</sup>H NMR (400 MHz, CDCl<sub>3</sub>) δ= 10.15 (s, 1H), 8.75 (s, 1H), 7.90-7.84 (m, 1H), 7.77-7.70 (m, 1H), 7.58-7.44 (m, 3H), 7.42-7.31 (m, 3H), 7.77-7.70 (m, 2H) ppm; <sup>13</sup>C NMR (101 MHz, CDCl<sub>3</sub>) δ= 168.7, 156.5, 150.1, 138.3, 133.2, 129.8 (2C), 129.6, 129.4, 127.1, 126.6, 126.4, 124.2, 121.7 (2C), 113.6, 112.0 ppm; HRMS (ESI): calcd. for C<sub>17</sub>H<sub>13</sub>O<sub>3</sub> [M+H]<sup>+</sup>: 265.0859 found: 265.0866.

## Preparation of Phenolic Ester **1k**

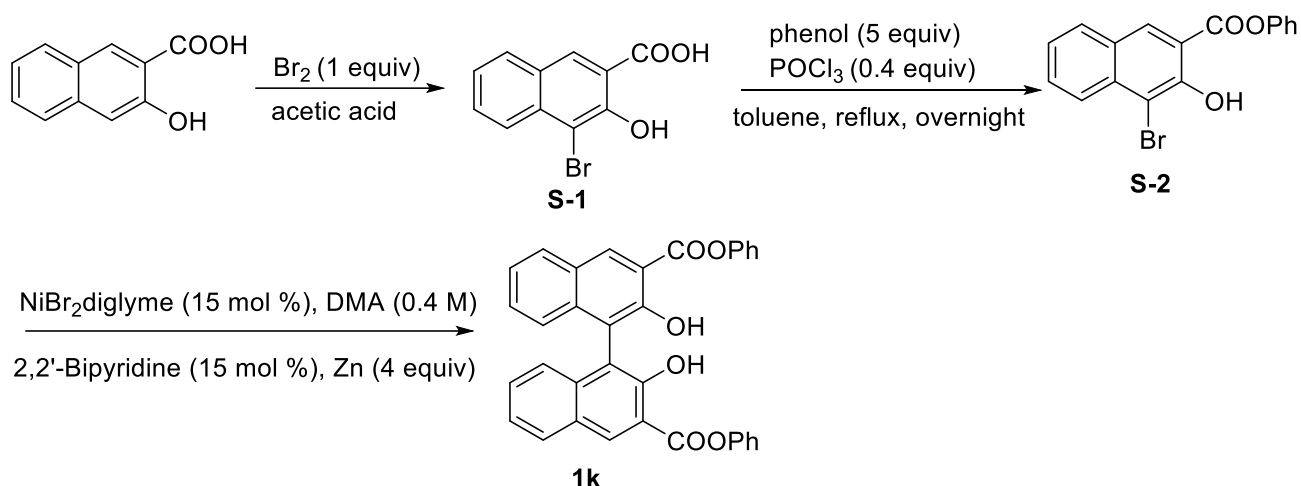

**Step1:** 3-Hydroxynaphthalene-2-carboxylic acid (3.0 g, 15.9 mmol, 1 equiv) was suspended in acetic acid (40 mL), and with vigorous stirring a solution of bromine (817 μL, 15.9 mmol, 1 equiv) in acetic acid (10 mL) was added drop wise within 30 minutes. After stirring at room temperature for 1 hour, the reaction mixture was filtered and washed with water. Evaporation of the volatiles afforded *4-bromo-3-hydroxynaphthalene-2-carboxylic acid* (**S-1**) as a yellow solid (3.85 g, 90 % yield); <sup>1</sup>H NMR (400 MHz, DMSO-*d*<sub>6</sub>) δ= 8.65 (s, 1H), 8.13-8.01 (m, 2H), 7.78-7.67 (m, 1H), 7.54-7.43 (m, 1H) ppm; <sup>13</sup>C NMR (101 MHz, DMSO-*d*<sub>6</sub>) δ= 172.0, 153.8, 135.5, 132.8, 131.2, 130.6, 127.6, 125.2, 125.0, 115.7, 105.9 ppm; HRMS (ESI): calcd. for C<sub>11</sub>H<sub>8</sub>BrO<sub>3</sub> [M+H]<sup>+</sup>: 266.9651 found: 266.9654.

**Step2:** *4-Bromo-3-hydroxynaphthalene-2-carboxylic acid* (**S-1**) (3.85 g, 14.4 mmol, 1 equiv) and phenol (6.78 g, 72 mmol, 5 equiv) were dissolved in 30 mL of toluene in a 100 mL round bottle. Phosphorus oxychloride (0.88 g, 0.53 mL, 5.76 mmol, 0.4 equiv) was added into the solution via syringe dropwise. After the reaction mixture was stirred under reflux (with oil bath at 110 °C) overnight, the mixture was allowed to cool to room temperature, transferred to a separatory funnel, and



quenched with saturated aqueous sodium carbonate solution. The aqueous layer was then extracted with ethyl acetate. The organic layers were combined, dried with sodium sulfate, and concentrated in vacuo. The crude product was purified by column chromatography (petroleum ether /ethyl acetate=20:1) on silica gel to give *phenyl 4-bromo-3-hydroxy-2-naphthoate* (**S-2**) as a yellow solid (3.76 g, 76 % yield). <sup>1</sup>H NMR (400 MHz, CDCl<sub>3</sub>) δ= 10.96 (s, 1H), 8.74 (s, 1H), 8.21 (d, *J* = 8.7, 1H), 7.88 (d, *J* = 8.2 Hz, 1H), 7.75-7.62 (m, 1H), 7.54-7.45 (m, 2H), 7.47-7.41 (m, 1H), 7.40-7.31 (m, 1H), 7.31-7.24 (m, 2H) ppm; <sup>13</sup>C NMR (101 MHz, CDCl<sub>3</sub>) δ= 168.4, 153.2, 150.0, 136.5, 132.6, 131.0, 129.9, 129.8 (2C), 127.5, 126.7, 126.0, 124.9, 121.5 (2C), 113.7, 107.4 ppm; HRMS (ESI): calcd. for C<sub>17</sub>H<sub>11</sub>BrNaO<sub>3</sub> [M+Na]<sup>+</sup>: 364.9784 found: 364.9787.

### Step3:

A sealed test tube charged with 2,2'-bipyridine (14.0 mg, 0.03 mmol, 15 mol %), *4-bromo-3-hydroxy-2-naphthoate* (**S-2**) (205.9 mg, 0.6 mmol) and a stir bar was evacuated and filled with nitrogen (three cycles), and then NiBr<sub>2</sub>•diglyme (32.0 mg, 0.03 mmol, 15 mol%) and Zn-powder (150.0 mg, 0.8 mmol, 4.0 equiv) were added in the glovebox. Subsequently, DMA (1.2 mL) was added to the mixture under nitrogen atmosphere. Then the reaction mixture was heated to 40 °C with oil bath and stirred at this temperature for 10 h. The mixture was then filtered through a pad of Celite and concentrated under reduced pressure. The residue was purified through column chromatography on silica gel (petroleum ether/ethyl acetate= 10:1) to afford *diphenyl 2,2'-dihydroxy-[1,1'-binaphthalene]-3,3'-dicarboxylate* (**1k**) as a yellow solid (1.84 g, 32 % yield); <sup>1</sup>H NMR (400 MHz, CDCl<sub>3</sub>) δ= 10.94 (s, 1H), 10.14 (s, 1H), 8.70 (d, *J* = 8.1 Hz, 2H), 8.18 (d, *J* = 8.6 Hz, 1H), 7.83 (dd, *J* = 8.3, 3.4 Hz, 2H), 7.71-7.60 (m, 2H), 7.54-7.50 (m, 1H), 7.49 (d, *J* = 2.7 Hz, 1H), 7.47 (d, *J* = 3.2 Hz, 2H), 7.45 (d, *J* = 3.1 Hz, 1H), 7.43-7.38 (m, 1H), 7.36-7.33 (m, 3H), 7.33-7.31 (m, 1H), 7.28-7.26 (m, 1H), 7.26-7.22 (m, 2H) ppm; <sup>13</sup>C NMR (126 MHz, CDCl<sub>3</sub>) δ= 168.7, 168.4, 156.5, 153.2, 150.2, 150.0, 138.3, 136.5, 133.2, 132.6, 131.0, 129.9, 129.84 (2C), 129.75 (2C), 129.6, 129.4, 127.6, 127.2, 126.8, 126.6, 126.4, 126.0, 124.9, 124.2, 121.7 (2C), 121.6 (2C), 113.7, 113.6, 112.0, 107.4 ppm; HRMS (ESI): calcd. for C<sub>34</sub>H<sub>23</sub>O<sub>6</sub> [M+H]<sup>+</sup>: 527.1489 found: 527.1493.

## Preparation of Salicylate Esters **4a**, **4c** and **4d**

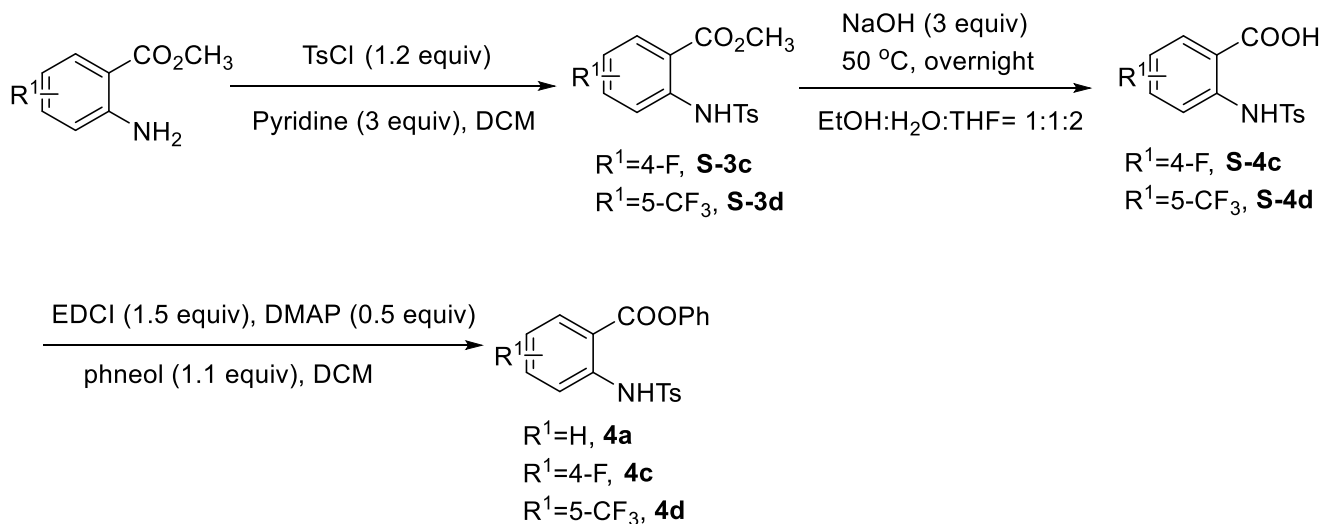

**Step1:** To a solution of methyl 2-aminobenzoates (10.0 mmol, 1 equiv) in 20 mL of DCM under N<sub>2</sub> atmosphere, were added pyridine (2.4 mL, 30 mmol, 3 equiv) and tosyl chloride (2.3 g, 12 mmol, 1.2 equiv). After the mixture was stirred at room temperature for 1 h, the reaction was quenched by addition of water. The mixture was extracted with EtOAc, and the combined organic layers were washed with brine and dried over Na<sub>2</sub>SO<sub>4</sub>. After removal of the solvent, the residue was purified by column chromatography on silica gel (petroleum ether / EtOAc= 10:1) to give **S-3c** and **S-3d**.

**Step2:** **S-3** (8 mmol, 1 equiv) and NaOH (0.96 g, 24 mmol, 3 equiv) were dissolved in H<sub>2</sub>O (10 mL), EtOH (10 mL) and THF

(20 mL). The reaction mixture was stirred for overnight with oil bath at 50 °C. The organic solvent was then removed under vacuum. The residue was extracted with ethyl acetate, The water layer was acidified with concentrated HCl until pH = 2 and extracted with ethyl acetate. The combined organic layers were concentrated under vacuum to afford **S-4c** and **S-4d**.

**Step3: S-4** (8 mmol, 1 equiv),<sup>a</sup> EDCI (2.3 g, 24 mmol, 1.5 equiv), DMAP (488.8 mg, 4 mmol, 0.5 equiv) and phenol (828.2 mg, 8.8 mmol, 1.1 equiv) were dissolved in DCM (20 mL). The reaction mixture was stirred for overnight at room temperature. The reaction was quenched by addition of water. The mixture was extracted with DCM and combined organic layers were washed with brine and dried over Na<sub>2</sub>SO<sub>4</sub>. After removal of the solvent, the residue was purified by column chromatography on silica gel (petroleum ether / EtOAc= 10:1) to give **4a**, **4c**, **4d**.

<sup>a</sup> **S-4a** was prepared according to the method reported in the literature.<sup>2,3</sup>

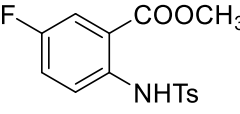  
**S-3c** *Methyl 5-fluoro-2-((4-methylphenyl)sulfonamido)benzoate (S-3c)* was isolated through column chromatography on silica gel with petroleum ether to the mixture eluent of petroleum ether and ethyl acetate (10:1) as a white solid (2.70 g, 84 % yield). <sup>1</sup>H NMR (400 MHz, CDCl<sub>3</sub>) δ= 10.29 (s, 1H), 7.73-7.65 (m, 3H), 7.57 (dd, *J* = 9.0, 3.1 Hz, 1H), 7.23-7.17 (m, 3H), 3.86 (s, 3H), 2.37 (s, 3H) ppm; <sup>13</sup>C NMR (101 MHz, CDCl<sub>3</sub>) δ= 167.1 (d, *J* = 2.6 Hz), 157.9 (d, *J* = 244.5 Hz), 144.0, 136.6 (d, *J* = 2.7 Hz), 136.0, 129.6 (2C), 127.2 (2C), 121.8, 121.7 (d, *J* = 14.5 Hz), 117.7 (d, *J* = 7.2 Hz), 117.2 (d, *J* = 24.3 Hz), 52.6, 21.5 ppm; <sup>19</sup>F NMR (376 MHz, CDCl<sub>3</sub>) δ= -118.00- -118.86 (m, 1F) ppm; HRMS (ESI): calcd. for C<sub>15</sub>H<sub>14</sub>FNO<sub>4</sub>SNa [M+Na]<sup>+</sup>: 346.0520 found: 346.0520.

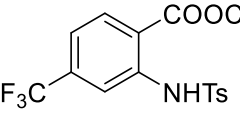  
**S-3d** *Methyl 2-((4-methylphenyl)sulfonamido)-4-(trifluoromethyl)benzoate (S-3d)* was isolated through column chromatography on silica gel with petroleum ether to the mixture eluent of petroleum ether and ethyl acetate (10:1) as a white solid (1.80 g, 82 % yield). <sup>1</sup>H NMR (400 MHz, CDCl<sub>3</sub>) δ= 10.71 (s, 1H), 8.03 (dd, *J* = 8.3, 0.9 Hz, 1H), 7.98 (d, *J* = 1.6 Hz, 1H), 7.77 (d, *J* = 8.4 Hz, 2H), 7.26-7.23 (m, 3H), 3.93 (s, 3H), 2.38 (s, 3H) ppm; <sup>13</sup>C NMR (101 MHz, CDCl<sub>3</sub>) δ= 167.4, 144.4, 141.0, 135.9, 135.8 (q, *J* = 32.3 Hz), 131.9, 129.8 (2C), 127.4 (2C), 123.0 (q, *J* = 273.3 Hz), 119.0 (q, *J* = 3.7 Hz), 118.0, 115.5 (q, *J* = 4.0 Hz), 52.9, 21.6 ppm; <sup>19</sup>F NMR (376 MHz, CDCl<sub>3</sub>) δ= -63.72 (s, 3F) ppm; HRMS (ESI): calcd. for C<sub>16</sub>H<sub>14</sub>F<sub>3</sub>NO<sub>4</sub>SNa [M+Na]<sup>+</sup>: 396.0488 found: 396.0490.

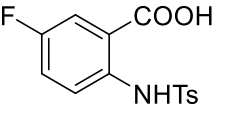  
**S-4c** *5-Fluoro-2-((4-methylphenyl)sulfonamido)benzoic acid (S-4c)* was isolated through column chromatography on silica gel with petroleum ether to the mixture eluent of petroleum ether and ethyl acetate (2:1) as a white solid (2.42 g, 98 % yield). <sup>1</sup>H NMR (400 MHz, DMSO-*d*<sub>6</sub>) δ= 7.67-7.56 (m, 3H), 7.46 (dd, *J* = 9.1, 4.8 Hz, 1H), 7.36-7.19 (m, 3H), 2.31 (s, 3H) ppm; <sup>13</sup>C NMR (126 MHz, DMSO-*d*<sub>6</sub>) δ= 168.9, 157.0 (d, *J* = 244.5 Hz), 144.6, 136.5 (d, *J* = 3.3 Hz), 136.0, 130.4 (2C), 127.3 (2C), 122.0 (d, *J* = 2.9 Hz), 121.9 (d, *J* = 11.9 Hz), 119.8 (d, *J* = 7.1 Hz), 117.8 (d, *J* = 24.0 Hz), 21.4 ppm; <sup>19</sup>F NMR (471 MHz, DMSO-*d*<sub>6</sub>) δ= -118.01 - -118.46 (m, 1F); HRMS (ESI): calcd. for C<sub>14</sub>H<sub>12</sub>FNO<sub>4</sub>SNa [M+Na]<sup>+</sup>: 332.0363 found: 330.0367.

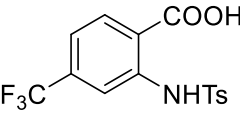  
**S-4d** *2-((4-Methylphenyl)sulfonamido)-4-(trifluoromethyl)benzoic acid (S-4d)* was isolated through column chromatography on silica gel with petroleum ether to the mixture eluent of petroleum ether and ethyl acetate (2:1) as a white solid (2.81 g, 98 % yield). <sup>1</sup>H NMR (400 MHz, DMSO-*d*<sub>6</sub>) δ= 8.08 (d, *J* = 8.1 Hz, 1H), 7.76-7.63 (m, 3H), 7.33 (d, *J* = 8.0 Hz, 2H), 7.25 (d, *J* = 8.1 Hz, 1H), 2.31 (s, 3H) ppm; <sup>13</sup>C NMR (101 MHz, DMSO-*d*<sub>6</sub>) δ= 168.7, 143.5, 143.4, 137.9, 132.8, 132.3 (q, *J* = 31.8 Hz), 130.1 (2C), 126.9 (2C), 124.5, 124.1 (q, *J* = 272.9 Hz), 117.7 (q, *J* = 3.9 Hz), 114.2 (q, *J* = 4.0 Hz), 21.3; <sup>19</sup>F NMR (376 MHz, DMSO-*d*<sub>6</sub>) δ= -61.98 (s, 3F) ppm. HRMS (ESI): calcd. for C<sub>15</sub>H<sub>12</sub>F<sub>3</sub>NO<sub>4</sub>SNa [M+Na]<sup>+</sup>: 382.0331 found: 382.0341.

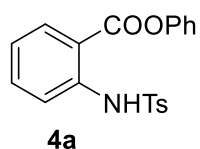

*1-(2-Hydroxyphenyl)nonan-1-one (4a)* was isolated through column chromatography on silica gel with petroleum ether to the mixture eluent of petroleum ether and ethyl acetate (10:1) as a white solid (2.20 g, 60 % yield).  $^1\text{H}$  NMR (400 MHz,  $\text{CDCl}_3$ )  $\delta$ = 10.44 (s, 1H), 8.16 (dd,  $J$ = 8.0, 1.7 Hz, 1H), 7.79-7.70 (m, 3H), 7.57-7.47 (m, 1H), 7.46-7.40 (m, 2H), 7.34-7.25 (m, 1H), 7.22 (d,  $J$ = 8.1 Hz, 2H), 7.16-7.06 (m, 3H), 2.36 (s, 3H) ppm;  $^{13}\text{C}$  NMR (101 MHz,  $\text{CDCl}_3$ )  $\delta$ = 166.8, 150.1, 144.1, 141.2, 136.4, 135.3, 131.7, 129.74 (2C), 129.69 (2C), 127.4 (2C), 126.5, 123.1, 121.6 (2C), 119.2, 115.1, 21.6 ppm; HRMS (ESI): calcd. for  $\text{C}_{20}\text{H}_{17}\text{NO}_4\text{SNa}$   $[\text{M}+\text{Na}]^+$ : 390.0770 found: 390.0779.

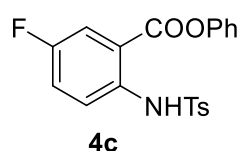

*Phenyl 5-fluoro-2-((4-methylphenyl)sulfonamido)benzoate (4c)* was isolated through column chromatography on silica gel with petroleum ether to the mixture eluent of petroleum ether and ethyl acetate (10:1) as a white solid (2.64 g, 86 % yield).  $^1\text{H}$  NMR (400 MHz,  $\text{CDCl}_3$ )  $\delta$ = 10.09 (s, 1H), 7.86-7.76 (m, 2H), 7.72-7.65 (m, 2H), 7.49-7.42 (m, 2H), 7.35-7.28 (m, 2H), 7.24 (d,  $J$ = 8.1 Hz, 2H), 7.13-7.04 (m, 2H), 2.39 (s, 3H) ppm;  $^{13}\text{C}$  NMR (101 MHz,  $\text{CDCl}_3$ )  $\delta$ = 165.5 (d,  $J$ = 2.6 Hz), 158.0 (d,  $J$ = 244.9 Hz), 149.9, 144.1, 137.3 (d,  $J$ = 2.7 Hz), 136.1, 129.7 (4C), 127.3 (2C), 126.6, 122.5 (d,  $J$ = 22.5 Hz), 122.1 (d,  $J$ = 7.6 Hz), 121.4 (2C), 117.6 (d,  $J$ = 24.5 Hz), 117.0 (d,  $J$ = 7.3 Hz), 21.6 ppm;  $^{19}\text{F}$  NMR (376 MHz,  $\text{CDCl}_3$ )  $\delta$ = -114.76 - -125.43 (m, 1F) ppm; HRMS (ESI): calcd. for  $\text{C}_{20}\text{H}_{16}\text{FNO}_4\text{SNa}$   $[\text{M}+\text{Na}]^+$ : 408.0676 found: 408.0682

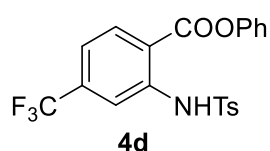

*Phenyl 2-((4-methylphenyl)sulfonamido)-4-(trifluoromethyl)benzoate (4d)* was isolated through column chromatography on silica gel with petroleum ether to the mixture eluent of petroleum ether and ethyl acetate (10:1) as a white solid (2.34 g, 68 % yield).  $^1\text{H}$  NMR (400 MHz,  $\text{CDCl}_3$ )  $\delta$ = 10.51 (s, 1H), 8.33-8.24 (m, 1H), 8.06 (s, 1H), 7.81-7.74 (m, 2H), 7.49-7.42 (m, 2H), 7.38-7.30 (m, 2H), 7.29-7.22 (m, 2H), 7.18- 7.07 (m, 2H), 2.39 (s, 3H) ppm;  $^{13}\text{C}$  NMR (101 MHz,  $\text{CDCl}_3$ )  $\delta$ = 165.8, 149.8, 144.6, 141.7, 136.4 (q,  $J$ = 33.2 Hz), 135.9, 132.4, 129.9 (2C), 129.8 (2C), 127.4 (2C), 126.8, 123.0 (q,  $J$ =276.7 Hz), 121.4 (2C), 119.1 (q,  $J$ = 3.6 Hz), 117.3, 115.6 (q,  $J$ = 4.0 Hz), 21.6 ppm;  $^{19}\text{F}$  NMR (376 MHz,  $\text{CDCl}_3$ )  $\delta$ = -63.75 (s, 3F) ppm; HRMS (ESI): calcd. for  $\text{C}_{21}\text{H}_{16}\text{F}_3\text{NO}_4\text{SNa}$   $[\text{M}+\text{Na}]^+$ : 458.0644 found: 458.0649

## Preparation of Salicylate Ester 4b

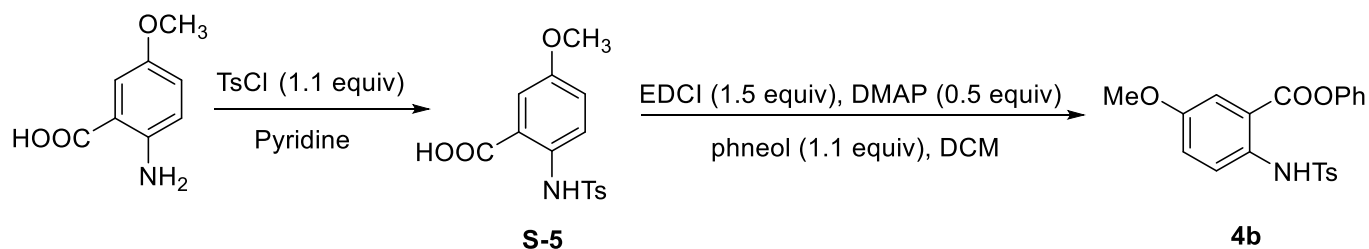

To a solution of a 2-amino-5-methoxybenzoic acid (1.67 g, 10.0 mmol, 1 equiv) in dry pyridine (20 mL), tosyl chloride (2.09 g, 11 mmol, 1.1 equiv) was added at 0 °C under nitrogen atmosphere. After 10 h, the reaction was quenched with ice water, and the aqueous layer was extracted with DCM. The organic layers were combined, washed with HCl 10% (5 mL), brine (10 mL), dried over  $\text{MgSO}_4$ , filtered and concentrated under reduced pressure. The residue was purified by column chromatography on silica gel (petroleum ether / EtOAc= 1:1) to give **S-5**.

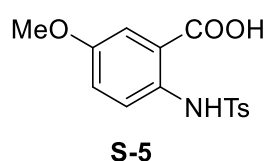

*5-Methoxy-2-((4-methylphenyl)sulfonamido)benzoic acid (S-5)* was isolated through column chromatography on silica gel with petroleum ether to the mixture eluent of petroleum ether and ethyl acetate (1:1) as a white solid (2.60 g, 81 % yield).  $^1\text{H}$  NMR (500 MHz,  $\text{DMSO}-d_6$ )  $\delta$ = 10.53 (s, 1H), 7.59 (d,  $J$ = 8.4 Hz, 2H), 7.47 (d,  $J$ = 9.0 Hz, 1H), 7.36-7.30 (m, 3H), 7.18 (dd,  $J$ = 9.0, 3.2

Hz, 1H), 3.72 (s, 3H), 2.33 (s, 3H) ppm;  $^{13}\text{C}$  NMR (126 MHz, DMSO- $d_6$ )  $\delta$ = 169.6, 155.6, 144.3, 136.2, 133.1, 130.3 (2C), 127.3 (2C), 122.3, 121.0, 119.8, 115.5, 55.9, 21.4 ppm; HRMS (ESI): calcd. for  $\text{C}_{15}\text{H}_{15}\text{NO}_5\text{SNa}$   $[\text{M}+\text{Na}]^+$ : 344.0563 found: 344.0568.

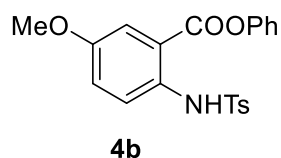

*Phenyl 5-methoxy-2-((4-methylphenyl)sulfonamido)benzoate (4b)* was isolated through column chromatography on silica gel with petroleum ether to the mixture eluent of petroleum ether and ethyl acetate (10:1) as a white solid (2.77 g, 87 % yield).  $^1\text{H}$  NMR (400 MHz,  $\text{CDCl}_3$ )  $\delta$ = 9.82 (s, 1H), 7.74 (d,  $J$ = 9.1 Hz, 1H), 7.67-7.61 (m, 2H), 7.59 (d,  $J$ = 3.1 Hz, 1H), 7.48-7.41 (m, 2H), 7.34-7.28 (m, 1H), 7.23-7.19 (m, 2H), 7.14 (dd,  $J$ = 9.1, 3.1 Hz, 1H), 7.10-7.00 (m, 2H), 3.82 (s, 3H), 2.38 (s, 3H) ppm;  $^{13}\text{C}$  NMR (101 MHz,  $\text{CDCl}_3$ )  $\delta$ = 166.1, 155.6, 150.0, 143.8, 136.2, 134.1, 129.6 (2C), 129.5 (2C), 127.3 (2C), 126.5, 122.9, 121.7, 121.5 (2C), 117.4, 115.1, 55.7, 21.6 ppm. HRMS (ESI): calcd. for  $\text{C}_{21}\text{H}_{19}\text{NO}_5\text{SNa}$   $[\text{M}+\text{Na}]^+$ : 420.0876 found: 420.0887.

## Preparation of Alkyl Bromides

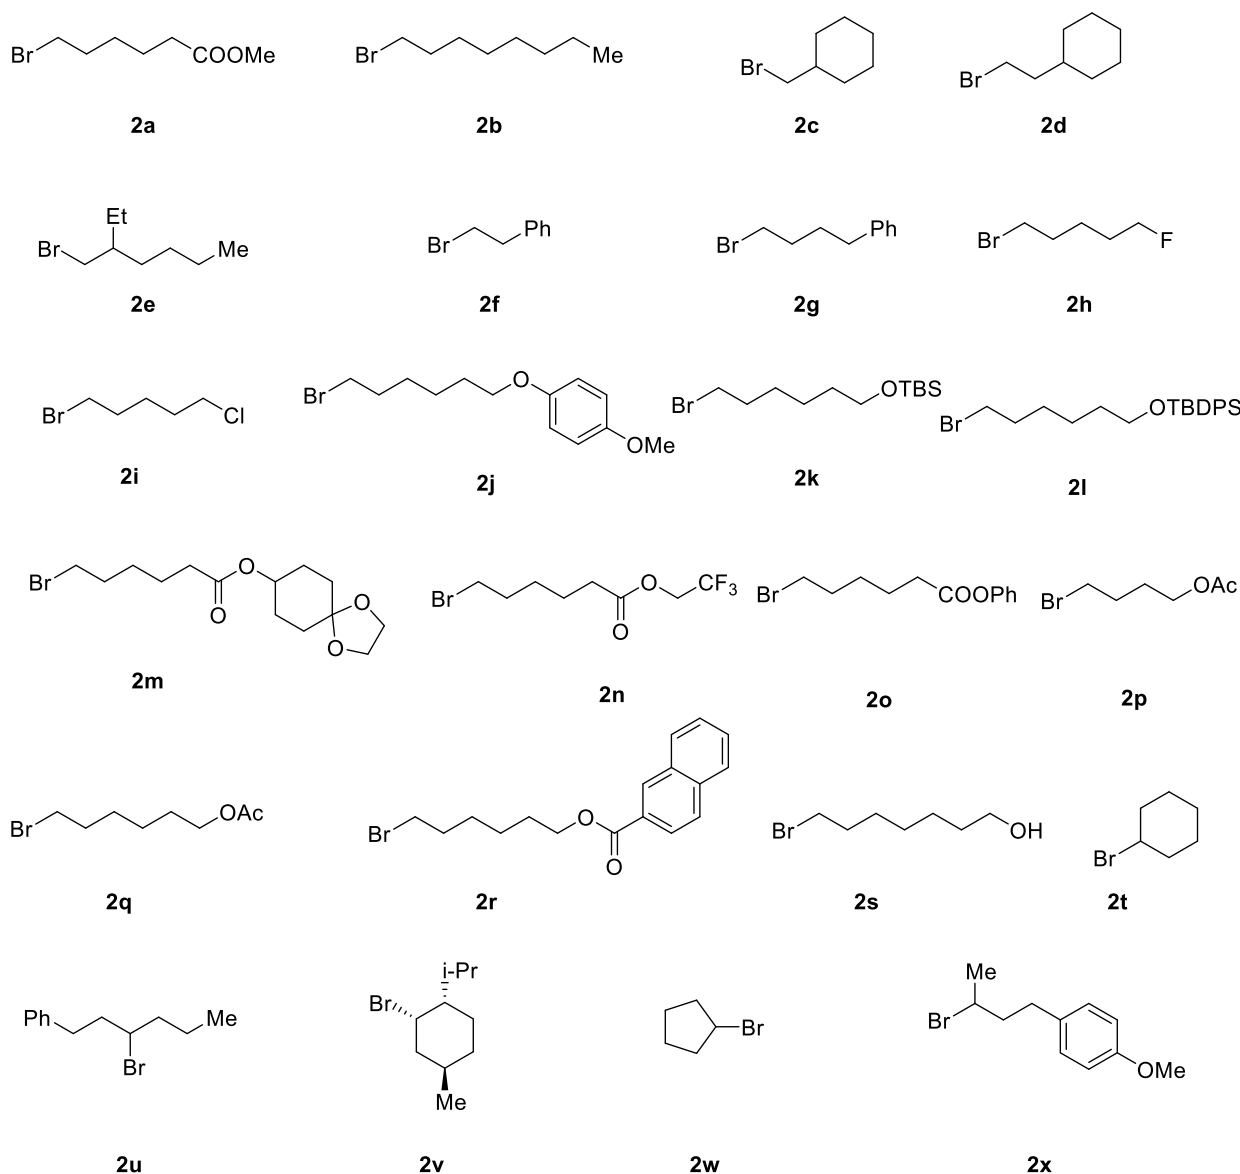

Compounds **2a-i**, **2p**, **2s**, **2t** and **2w** are commercially available. Compounds **2j**<sup>4</sup>, **2k**<sup>5</sup>, **2l**<sup>6</sup>, **2n**<sup>7</sup>, **2o**<sup>7</sup>, **2q**<sup>7</sup>, **2u**<sup>8</sup>, **2v**<sup>7</sup>, **2x**<sup>9</sup> are known and their NMR-data are consistent with these reported in the literature.

## Preparation of Alkyl Bromide 2m and 2r.

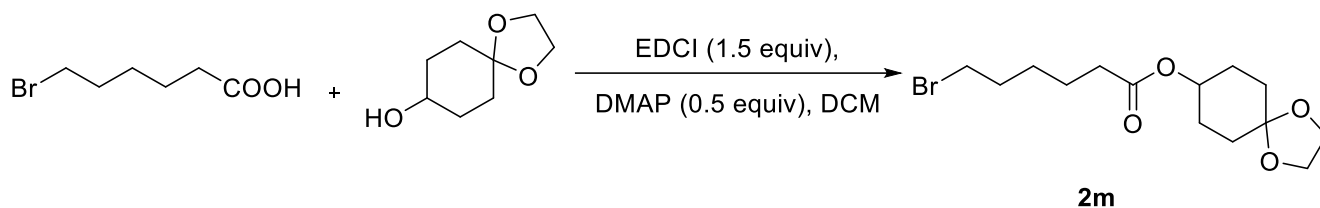

6-Bromohexanoic acid (2.1 g, 11.0 mmol, 1.1 equiv), EDCI (2.9 g, 15 mmol, 1.5 equiv), DMAP (610.0 mg, 5 mmol, 0.5 equiv) and 1,4-dioxaspiro[4.5]decan-8-ol (1.58 g, 10.0 mmol, 1.0 equiv) were dissolved in DCM (20 mL). The reaction mixture was stirred for overnight at room temperature, before it was quenched by addition of water. The mixture was extracted with DCM and combined organic layers were washed with brine and dried over Na<sub>2</sub>SO<sub>4</sub>. After removal of the solvent, the residue was purified by column chromatography on silica gel (petroleum ether / EtOAc= 10:1) to give *1,4-dioxaspiro[4.5]Decan-8-yl 6-bromohexanoate* (**2m**) as a colorless oil (2.74 g, 82% yield). <sup>1</sup>H NMR (500 MHz, CDCl<sub>3</sub>) δ= 5.00-4.65 (m, 1H), 4.00-3.82 (m, 4H), 3.41 (t, *J*= 6.8 Hz, 2H), 2.32 (t, *J*= 7.4 Hz, 2H), 1.91-1.84 (m, 4H), 1.82-1.71 (m, 4H), 1.69-1.56 (m, 4H), 1.52-1.43 (m, 2H) ppm; <sup>13</sup>C NMR (126 MHz, CDCl<sub>3</sub>) δ= 172.8, 107.9, 69.9, 64.29, 64.27, 34.3, 33.5, 32.3, 31.2 (2C), 28.3 (2C), 27.6, 24.1 ppm; HRMS (ESI): calcd. for C<sub>14</sub>H<sub>24</sub>BrO<sub>4</sub> [M+H]<sup>+</sup>: 335.0852 found:335.0856.

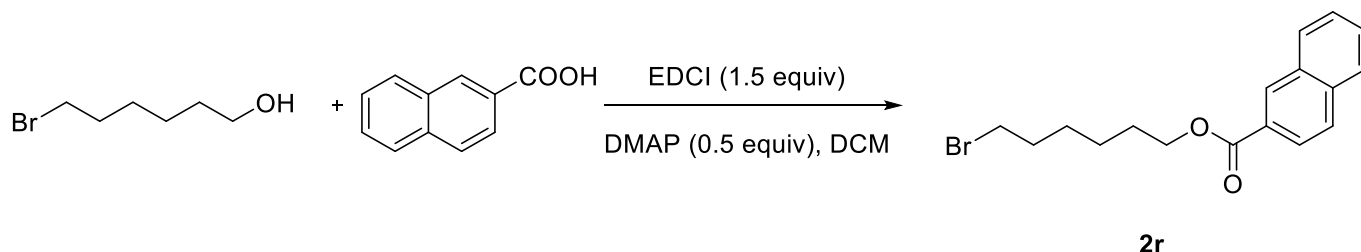

6-Bromohexan-1-ol (1.8 g, 10.0 mmol, 1.0 equiv), EDCI (2.9 g, 15 mmol, 1.5 equiv), DMAP (610.0 mg, 5 mmol, 0.5 equiv) and 2-naphthoic acid (1.9 g, 11.0 mmol, 1.1 equiv) were dissolved in DCM (20 mL). The reaction mixture was stirred for overnight at room temperature., before it was quenched by addition of water. The mixture was extracted with DCM and combined organic layers were washed with brine and dried over Na<sub>2</sub>SO<sub>4</sub>. After removal of the solvent, the residue was purified by column chromatography on silica gel (petroleum ether / EtOAc= 10:1) to give *6-bromohexyl 2-naphthoate* (**2r**) as a white solid (2.68 g, 80% yield). <sup>1</sup>H NMR (500 MHz, CDCl<sub>3</sub>) δ= 8.60 (s, 1H), 8.06 (d, *J*= 8.5 Hz, 1H), 7.96 (d, *J*= 8.1 Hz, 1H), 7.88 (d, *J*= 8.6 Hz, 2H), 7.63 -7.48 (m, 2H), 4.38 (t, *J*= 6.6 Hz, 2H), 3.42 (t, *J*= 6.8 Hz, 2H), 1.92-1.82 (m, 4H), 1.60-1.44 (m, 4H) ppm; <sup>13</sup>C NMR (126 MHz, CDCl<sub>3</sub>) δ= 166.8, 135.5, 132.5, 131.0, 129.4, 128.2, 128.2, 127.8, 127.7, 126.7, 125.3, 65.0, 33.8, 32.7, 28.7, 27.9, 25.4 ppm; HRMS (ESI): calcd. for C<sub>17</sub>H<sub>20</sub>BrO<sub>2</sub> [M+H]<sup>+</sup>: 335.0641 found:335.0635.

## General Procedure for the Ni-Catalyzed Cross-coupling of Phenolic Esters with Alkyl Bromides

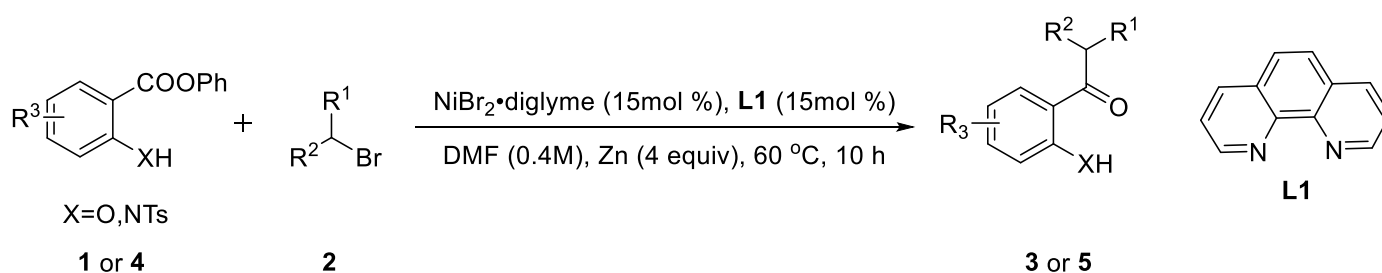

A sealed reaction tube charged with the phenolic esters **1** or **4** (0.2 mmol, 1 equiv), ligand **L1** (5.4 mg, 0.03 mmol, 15 mol%) and a stir bar was evacuated and filled with nitrogen (three cycles). In a nitrogen-filled glovebox, NiBr<sub>2</sub>•diglyme (10.6 mg, 0.03 mmol, 15 mol%) and Zn-powder (52 mg, 0.8 mmol, 4.0 equiv) were added to the mixture. The reaction tube was then sealed and removed from the glove box. Subsequently, DMF (0.5 mL) was added to the mixture under nitrogen atmosphere. Then the reaction mixture was heated to 60 °C with a heating block, before alkyl bromides **2** (0.3 mmol, 1.5 equiv)<sup>a</sup> were added. After stirring at this temperature for 10 h, the mixture was then filtered through a pad of Celite and concentrated under reduced pressure. The residue was purified through column chromatography on silica gel (petroleum ether/ethyl acetate) to afford the corresponding products **3** or **5**. <sup>a</sup> 3 Equiv of the alkyl bromide was used in the case of **3kb**.

## Analytical Data for the Products **3** and **5**

The products **3ab**,<sup>10</sup> **3ac**,<sup>11</sup> **3af**,<sup>12</sup> **3ai**<sup>13</sup> and **3at**<sup>14</sup> are known compounds and their NMR-data are consistent with these reported in the literature.

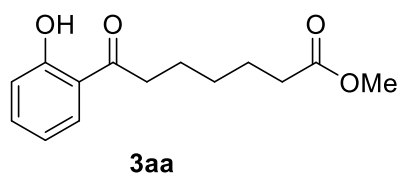

*Methyl 7-(2-hydroxyphenyl)-7-oxoheptanoate (3aa)* was isolated through column chromatography on silica gel with petroleum ether to the mixture eluent of petroleum ether and ethyl acetate (10:1) as a colorless oil (46 mg, 92 % yield). <sup>1</sup>H NMR (400 MHz, CDCl<sub>3</sub>) δ= 12.36 (s, 1H), 7.75 (dd, *J* = 8.1, 1.7 Hz, 1H), 7.51-7.42 (m, 1H), 7.01-6.95

(m, 1H), 6.93-6.85 (m, 1H), 3.67 (s, 3H), 3.00 (t, *J* = 7.4 Hz, 2H), 2.34 (t, *J* = 7.4 Hz, 2H), 1.82-1.62 (m, 4H), 1.48-1.36 (m, 2H) ppm; <sup>13</sup>C NMR (101 MHz, CDCl<sub>3</sub>) δ= 206.5, 174.1, 162.5, 136.3, 129.9, 119.3, 118.9, 118.5, 51.6, 38.0, 33.8, 28.7, 24.7, 24.0 ppm; HRMS (ESI): calcd. for C<sub>14</sub>H<sub>19</sub>O<sub>4</sub> [M+H]<sup>+</sup>: 251.1278 found: 251.1261.

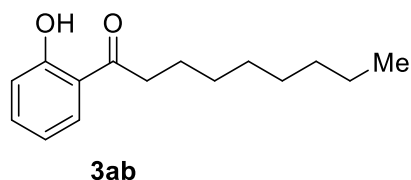

*1-(2-Hydroxyphenyl)nonan-1-one (3ab)* was isolated through column chromatography on silica gel with petroleum ether to the mixture eluent of petroleum ether and ethyl acetate (10:1) as a colorless oil (40 mg, 82 % yield). <sup>1</sup>H NMR (500 MHz, CDCl<sub>3</sub>) δ= 12.41 (s, 1H), 7.76 (dd, *J* = 8.0, 1.6 Hz, 1H), 7.49-7.42 (m, 1H), 6.98 (dd, *J* = 8.4, 1.1

Hz, 1H), 6.93-6.87 (m, 1H), 2.98 (t, *J* = 7.5 Hz, 2H), 1.79-1.68 (m, 2H), 1.44-1.20 (m, 10H), 0.88 (t, *J* = 6.8 Hz, 3H).ppm; <sup>13</sup>C NMR (126 MHz, CDCl<sub>3</sub>) δ= 207.0, 162.5, 136.2, 130.0, 119.4, 118.8, 118.5, 38.4, 31.9, 29.42, 29.35, 29.2, 24.6, 22.7, 14.1 ppm;

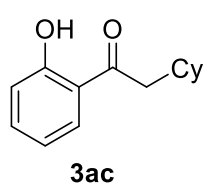

*2-Cyclohexyl-1-(2-hydroxyphenyl)ethan-1-one (3ac)* was isolated through column chromatography on silica gel with petroleum ether to the mixture eluent of petroleum ether and ethyl acetate (20:1) as a colorless oil (40 mg, 92 % yield). <sup>1</sup>H NMR (500 MHz, CDCl<sub>3</sub>) δ= 12.50 (s, 1H), 7.75 (dd, *J* = 7.9, 1.7 Hz, 1H), 7.50-7.43 (m, 1H), 6.98 (d, *J* = 8.4 Hz, 1H), 6.89 (t, *J* = 7.6 Hz, 1H), 2.83 (d, *J* = 6.8 Hz, 2H), 2.01-1.93 (m, 1H), 1.83-1.62 (m, 5H), 1.33-1.24 (m, 2H), 1.22-1.13 (m, 1H), 1.04 (dd, *J* = 12.1, 3.3 Hz,

2H) ppm; <sup>13</sup>C NMR (126 MHz, CDCl<sub>3</sub>) δ= 206.8, 162.7, 136.3, 130.3, 119.7, 118.8, 118.6, 45.9, 35.0, 33.4 (2C), 26.2, 26.1 (2C) ppm.

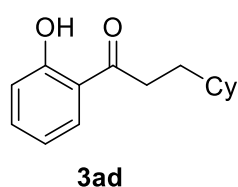

*3-Cyclohexyl-1-(2-hydroxyphenyl)propan-1-one (3ad)* was isolated through column chromatography on silica gel with petroleum ether to the mixture eluent of petroleum ether and ethyl acetate (20:1) as a yellow oil (42 mg, 90 % yield). <sup>1</sup>H NMR (500 MHz, CDCl<sub>3</sub>) δ= 12.41 (s, 1H), 7.76 (dd, *J* = 8.1, 1.6 Hz, 1H), 7.47-7.42 (m, 1H), 6.98 (dd, *J* = 8.5, 1.1 Hz, 1H), 6.92-6.86 (m, 1H), 3.05-2.96 (m, 2H), 1.79-1.71 (m, 4H), 1.69-1.60 (m, 3H), 1.39-1.12 (m, 4H), 1.01-0.89 (m, 2H) ppm; <sup>13</sup>C NMR (126

MHz, CDCl<sub>3</sub>) δ= 207.4, 162.5, 136.2, 130.0, 119.3, 118.9, 118.6, 37.4, 36.0, 33.2 (2C), 32.0, 26.5, 26.3 (2C) ppm; HRMS

(ESI): calcd. for  $C_{15}H_{21}O_2$   $[M+H]^+$ : 233.1536, found: 233.1536.

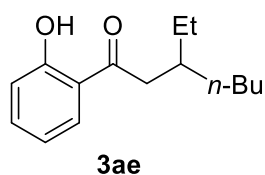

**3ae**

*3-Ethyl-1-(2-hydroxyphenyl)heptan-1-one (3ae)* was isolated through column chromatography on silica gel with petroleum ether to the mixture eluent of petroleum ether and ethyl acetate (20:1) as a yellow oil (41 mg, 87 % yield).  $^1H$  NMR (500 MHz,  $CDCl_3$ )  $\delta$ = 12.50 (s, 1H), 7.77 (dd,  $J$  = 8.1, 1.6 Hz, 1H), 7.50-7.40 (m, 1H), 6.98 (d,  $J$  = 8.4 Hz, 1H), 6.89 (t,  $J$  = 7.6 Hz, 1H), 2.89 (d,  $J$  = 6.8 Hz, 2H), 2.07-2.00 (m, 1H), 1.43-1.35 (m, 3H), 1.34-1.24 (m, 5H), 0.91 (t,  $J$  = 7.5 Hz, 3H), 0.89 (t,  $J$  = 6.9 Hz, 3H) ppm;  $^{13}C$  NMR (126 MHz,  $CDCl_3$ )  $\delta$ = 207.3, 162.6, 136.2, 130.1, 119.7, 118.8, 118.6, 42.7, 36.1, 33.2, 28.9, 26.4, 23.0, 14.1, 10.9 ppm; HRMS (ESI): calcd. for  $C_{15}H_{23}O_2$   $[M+H]^+$ : 235.1693, found: 235.1693.

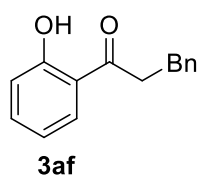

**3af**

*1-(2-Hydroxyphenyl)-3-phenylpropan-1-one (3af)* was isolated through column chromatography on silica gel (petroleum ether: EtOAc= 20:1) as a colorless oil (32 mg, 71 % yield).  $^1H$  NMR (400 MHz,  $CDCl_3$ )  $\delta$ = 12.30 (s, 1H), 7.74 (dd,  $J$  = 8.1, 1.7 Hz, 1H), 7.49-7.43 (m, 1H), 7.35 -7.28 (m, 2H), 7.27-7.18 (m, 3H), 6.98 (dd,  $J$  = 8.4, 1.2 Hz, 1H), 6.89-6.83 (m, 1H), 3.33 (t,  $J$  = 7.3 Hz, 2H), 3.07 (t,  $J$  = 7.4 Hz, 2H) ppm;  $^{13}C$  NMR (101 MHz,  $CDCl_3$ )  $\delta$ = 205.4, 162.5, 140.7, 136.4, 129.8, 128.6 (2C), 128.4 (2C), 126.4, 119.3, 119.0, 118.6, 40.1, 30.0 ppm.

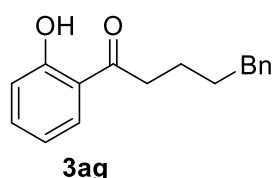

**3ag**

*1-(2-Hydroxyphenyl)-5-phenylpentan-1-one (3ag)* was isolated through column chromatography on silica gel (petroleum ether: EtOAc= 20:1) as a colorless oil (40 mg, 78 % yield).  $^1H$  NMR (400 MHz,  $CDCl_3$ )  $\delta$ = 12.38 (s, 1H), 7.72 (d,  $J$  = 8.0 Hz, 1H), 7.45 (s, 1H), 7.28 (t,  $J$  = 7.4 Hz, 2H), 7.20 -7.13 (m, 3H), 6.97 (d,  $J$  = 8.4 Hz, 1H), 6.87 (t,  $J$  = 7.6 Hz, 1H), 2.99 (t,  $J$  = 7.0 Hz, 2H), 2.67 (t,  $J$  = 7.3 Hz, 2H), 1.86-1.63 (m, 4H) ppm;  $^{13}C$  NMR (101 MHz,  $CDCl_3$ )  $\delta$ = 206.6, 162.5, 142.1, 136.3, 130.0, 128.42 (2C), 128.39 (2C), 125.9, 119.3, 118.9, 118.6, 38.2, 35.8, 31.0, 24.1 ppm; HRMS (ESI): calcd. for  $C_{17}H_{19}O_2$   $[M+H]^+$ : 255.1380, found: 255.1378.

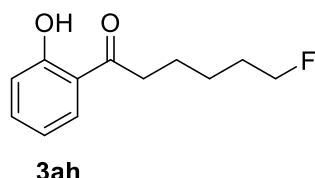

**3ah**

*6-Fluoro-1-(2-hydroxyphenyl)hexan-1-one (3ah)* was isolated through column chromatography on silica gel with petroleum ether to the mixture eluent of petroleum ether and ethyl acetate (20:1) as a yellow oil (35 mg, 83 % yield).  $^1H$  NMR (500 MHz,  $CDCl_3$ )  $\delta$ = 12.36 (s, 1H), 7.76 (d,  $J$  = 8.0 Hz, 1H), 7.47 (t,  $J$  = 7.8 Hz, 1H), 6.98 (d,  $J$  = 8.4 Hz, 1H), 6.90 (t,  $J$  = 7.6 Hz, 1H), 4.47 (dt,  $J$  = 47.3, 6.0 Hz, 2H), 3.02 (t,  $J$  = 7.3 Hz, 2H), 1.83-1.76 (m, 3H), 1.76-1.71 (m, 1H), 1.57-1.47 (m, 2H) ppm;  $^{13}C$  NMR (126 MHz,  $CDCl_3$ )  $\delta$ = 206.5, 162.5, 136.3, 129.9, 119.3, 118.9, 118.6, 84.5 (C-F,  $^1J_{C-F}$  = 164.4 Hz), 83.2 (C-F,  $^1J_{C-F}$  = 164.4 Hz), 38.1, 30.4 (C-F,  $^2J_{C-F}$  = 19.4 Hz), 30.2 (C-F,  $^2J_{C-F}$  = 19.4 Hz), 25.03 (C-F,  $^3J_{C-F}$  = 5.4 Hz), 24.99 (C-F,  $^3J_{C-F}$  = 5.4 Hz), 24.0 ppm;  $^{19}F$  NMR (376 MHz,  $CDCl_3$ )  $\delta$ = -218.25 - -218.73 (m, 1F); HRMS (ESI): calcd. for  $C_{12}H_{16}FO_2$   $[M+H]^+$ : 211.1129, found: 211.1125.

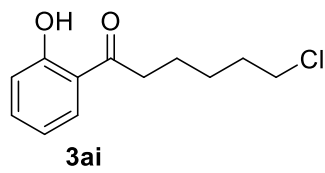

**3ai**

*6-Chloro-1-(2-hydroxyphenyl)hexan-1-one (3ai)* was isolated through column chromatography on silica gel with petroleum ether to the mixture eluent of petroleum ether and ethyl acetate (20:1) as a colorless oil (35 mg, 77 % yield).  $^1H$  NMR (400 MHz,  $CDCl_3$ )  $\delta$ = 12.34 (s, 1H), 7.76 (dd,  $J$  = 8.0, 1.7 Hz, 1H), 7.55-7.41 (m, 1H), 6.98 (d,  $J$  = 8.4 Hz, 1H), 6.90 (t,  $J$  = 7.6 Hz, 1H), 3.56 (t,  $J$  = 6.6 Hz, 2H), 3.02 (t,  $J$  = 7.3 Hz, 2H), 1.88-1.70 (m, 4H), 1.61-1.51 (m, 2H) ppm;  $^{13}C$  NMR (101 MHz,  $CDCl_3$ )  $\delta$ = 206.3, 162.5, 136.3, 129.9, 119.3, 118.9, 118.6, 44.8, 38.0, 32.4, 26.6, 23.6 ppm;

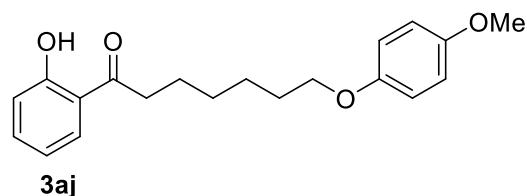

*1-(2-Hydroxyphenyl)-7-(4-methoxyphenoxy)heptan-1-one (3aj)* was isolated through column chromatography on silica gel with petroleum ether to the mixture eluent of petroleum ether and ethyl acetate (5:1) (53 mg, 81 % yield).  $^1\text{H}$  NMR (400 MHz,  $\text{CDCl}_3$ )  $\delta$  = 12.39 (s, 1H), 7.76 (dd,  $J$  = 8.0, 1.7 Hz, 1H), 7.46 (t,  $J$  = 1.5 Hz, 1H), 6.98 (dd,  $J$  = 8.4, 1.2 Hz, 1H), 6.90 (d,  $J$  = 8.2 Hz, 1H), 6.82 (s, 4H), 3.91 (t,  $J$  = 6.4 Hz, 2H), 3.76 (s, 3H), 3.00 (t,  $J$  = 7.4 Hz, 2H), 1.83-1.72 (m, 4H), 1.57-1.42 (m, 4H) ppm;  $^{13}\text{C}$  NMR (101 MHz,  $\text{CDCl}_3$ )  $\delta$  = 206.8, 162.5, 153.7, 153.2, 136.3, 130.0, 119.3, 118.9, 118.6, 115.4 (2C), 114.6 (2C), 68.4, 55.8, 38.2, 29.2, 29.1, 26.0, 24.4 ppm; HRMS (ESI): calcd. for  $\text{C}_{20}\text{H}_{25}\text{O}_4$   $[\text{M}+\text{H}]^+$ : 329.1747, found: 329.1750.

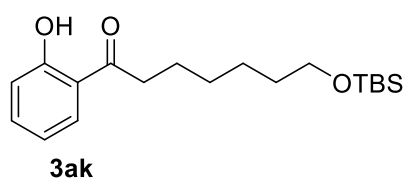

*7-((tert-Butyldimethylsilyl)oxy)-1-(2-hydroxyphenyl)heptan-1-one (3ak)* was isolated through column chromatography on silica gel with petroleum ether to the mixture eluent of petroleum ether and ethyl acetate (10:1) as a colorless oil (66 mg, 98 % yield).  $^1\text{H}$  NMR (400 MHz,  $\text{CDCl}_3$ )  $\delta$  = 12.41 (s, 1H), 7.76 (dd,  $J$  = 8.0, 1.7 Hz, 1H), 7.49-7.42 (m, 1H), 7.00-6.96 (m, 1H), 6.93-6.86 (m, 1H), 3.61 (t,  $J$  = 6.4 Hz, 2H), 2.99 (t,  $J$  = 7.4 Hz, 2H), 1.84-1.66 (m, 2H), 1.60-1.48 (m, 2H), 1.47-1.34 (m, 4H), 0.89 (s, 9H), 0.05 (s, 6H);  $^{13}\text{C}$  NMR (101 MHz,  $\text{CDCl}_3$ )  $\delta$  = 206.9, 162.5, 136.2, 130.0, 119.3, 118.8, 118.5, 63.1, 38.3, 32.7, 29.1, 26.0 (3C), 25.7, 24.5, 18.4, -5.6 (2C) ppm; HRMS (ESI): calcd. for  $\text{C}_{19}\text{H}_{33}\text{O}_3\text{Si}$   $[\text{M}+\text{H}]^+$ : 337.2193, found: 337.2189.

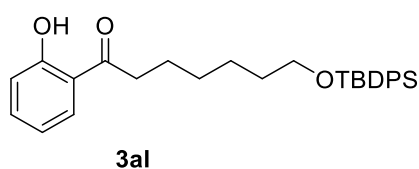

*7-((tert-Butyldiphenylsilyl)oxy)-1-(2-hydroxyphenyl)heptan-1-one (3al)* was isolated through column chromatography on silica gel with petroleum ether to the mixture eluent of petroleum ether and ethyl acetate (10:1) as a colorless oil (83 mg, 90 % yield).  $^1\text{H}$  NMR (400 MHz,  $\text{CDCl}_3$ )  $\delta$  = 12.42 (s, 1H), 7.74 (dd,  $J$  = 8.1, 1.7 Hz, 1H), 7.67 (dd,  $J$  = 7.4, 1.9 Hz, 4H), 7.45-7.32 (m, 7H), 7.00-6.96 (m, 1H), 6.90-6.84 (m, 1H), 3.67 (t,  $J$  = 6.3 Hz, 2H), 2.95 (t,  $J$  = 7.5 Hz, 2H), 1.75-1.68 (m, 2H), 1.63-1.51 (m, 2H), 1.47-1.32 (m, 4H), 1.05 (s, 9H) ppm;  $^{13}\text{C}$  NMR (101 MHz,  $\text{CDCl}_3$ )  $\delta$  = 206.9, 162.6, 136.2, 135.6 (4C), 134.2, 134.1, 130.0, 129.6, 129.5, 127.6 (4C), 119.4, 118.9, 118.6, 63.8, 38.3, 24, 29.1, 26.9 (3C), 25.7, 24.5, 19.3 ppm; HRMS (ESI): calcd. for  $\text{C}_{29}\text{H}_{37}\text{O}_3\text{Si}$   $[\text{M}+\text{H}]^+$ : 461.2506, found: 461.2536.

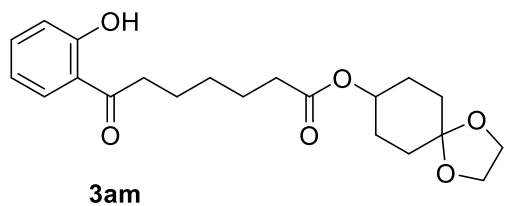

*1,4-Dioxaspiro[4.5]decan-8-yl 7-(2-hydroxyphenyl)-7-oxoheptanoate (3am)* was isolated through column chromatography on silica gel with petroleum ether to the mixture eluent of petroleum ether and ethyl acetate (5:1) as a white solid (53 mg, 71 % yield).  $^1\text{H}$  NMR (400 MHz,  $\text{CDCl}_3$ )  $\delta$  = 12.36 (s, 1H), 7.76 (dd,  $J$  = 8.1, 1.7 Hz, 1H), 7.49-7.42 (m, 1H), 6.98 (dd,  $J$  = 8.4, 1.2 Hz, 1H), 6.93-6.86 (m, 1H), 4.94-4.81 (m, 1H), 3.97-3.87 (m, 4H), 3.00 (t,  $J$  = 7.4 Hz, 2H), 2.33 (t,  $J$  = 7.4 Hz, 2H), 1.92-1.70 (m, 8H), 1.72-1.55 (m, 4H), 1.48-1.38 (m, 2H) ppm;  $^{13}\text{C}$  NMR (101 MHz,  $\text{CDCl}_3$ )  $\delta$  = 206.5, 173.1, 162.5, 136.3, 129.9, 118.9, 118.5, 108.0, 70.0, 64.4 (2C), 64.3 (2C), 38.0, 34.5, 31.3, 28.7, 28.4 (2C), 24.8, 24.0 ppm; HRMS (ESI): calcd. for  $\text{C}_{21}\text{H}_{29}\text{O}_6$   $[\text{M}+\text{H}]^+$ : 377.1959, found: 377.1963.

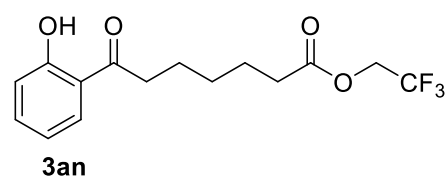

*2,2,2-Trifluoroethyl 7-(2-hydroxyphenyl)-7-oxoheptanoate (3an)* was isolated through column chromatography on silica gel with petroleum ether to the mixture eluent of petroleum ether and ethyl acetate (20:1) as a colorless oil (49 mg, 77 % yield).  $^1\text{H}$  NMR (500 MHz,  $\text{CDCl}_3$ )  $\delta$  = 12.35 (s, 1H), 7.75 (dd,  $J$  = 8.1, 1.6 Hz, 1H), 7.50-7.44 (m, 1H), 6.98 (dd,  $J$  = 8.4, 1.1 Hz, 1H), 6.93-6.86 (m, 1H), 4.47 (q,  $J$  = 8.5 Hz, 2H), 3.01 (t,  $J$  = 7.4 Hz, 2H), 2.46 (t,  $J$  = 7.5 Hz, 2H), 1.83-1.69 (m, 4H), 1.48-1.39 (m, 2H) ppm;  $^{13}\text{C}$  NMR (126 MHz,  $\text{CDCl}_3$ )  $\delta$  = 206.4, 171.9, 162.5, 136.3, 129.9, 123.0 (q,  $J$  = 277.4 Hz), 119.3, 118.9, 118.6, 60.2 (q,  $J$  = 36.6 Hz), 37.9,



33.4, 28.5, 24.5, 23.8 ppm;  $^{19}\text{F}$  NMR (376 MHz,  $\text{CDCl}_3$ )  $\delta = -73.78 - -73.92$  (m, 3F)ppm; HRMS (ESI): calcd. for  $\text{C}_{15}\text{H}_{17}\text{O}_4\text{F}_3\text{Na}[\text{M}+\text{Na}]^+$ :341.0971, found:341.0979.

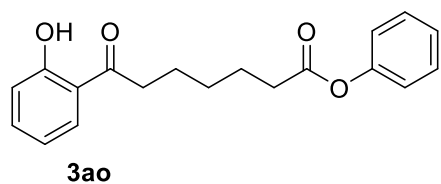

*Phenyl 7-(2-hydroxyphenyl)-7-oxoheptanoate (3ao)* was isolated through column chromatography on silica gel with petroleum ether to the mixture eluent of petroleum ether and ethyl acetate (20:1) (49 mg, 78 % yield).  $^1\text{H}$  NMR (500 MHz,  $\text{CDCl}_3$ )  $\delta = 12.37$  (s, 1H), 7.76 (dd,  $J = 8.0, 1.6$  Hz, 1H), 7.49-7.44 (m, 1H), 7.40-7.35 (m, 2H), 7.24-7.18 (m, 1H), 7.11-7.05 (m, 2H), 6.99 (dd,  $J = 8.4, 1.1$  Hz, 1H), 6.92-6.87 (m, 1H), 3.03 (t,  $J = 7.3$  Hz, 2H), 2.60 (t,  $J = 7.4$  Hz, 2H), 1.86-1.76 (m,

4H), 1.60-1.48 (m, 2H) ppm;  $^{13}\text{C}$  NMR (126 MHz,  $\text{CDCl}_3$ )  $\delta = 206.5, 172.1, 162.5, 150.7, 136.3, 130.0, 129.5$  (2C), 125.8, 121.6 (2C), 119.3, 118.9, 118.6, 38.0, 34.2, 29.0, 24.7, 23.9 ppm; HRMS (ESI): calcd. for  $\text{C}_{19}\text{H}_{21}\text{O}_4$   $[\text{M}+\text{H}]^+$ :313.1434, found: 313.1438.

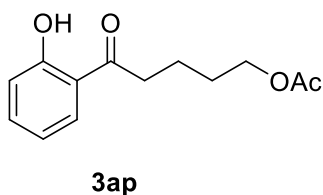

*5-(2-Hydroxyphenyl)-5-oxopentyl acetate (3ap)* was isolated through column chromatography on silica gel with petroleum ether to the mixture eluent of petroleum ether and ethyl acetate (10:1) as a colorless oil (34 mg, 73 % yield).  $^1\text{H}$  NMR (400 MHz,  $\text{CDCl}_3$ )  $\delta = 12.32$  (s, 1H), 7.76 (dd,  $J = 8.0, 1.7$  Hz, 1H), 7.52-7.44 (m, 1H), 6.98 (dd,  $J = 8.5, 1.2$  Hz, 1H), 6.94-6.86 (m, 1H), 4.12 (t,  $J = 6.3$  Hz, 2H), 3.04 (t,  $J = 7.1$  Hz, 2H), 2.05 (s, 3H), 1.91-1.71 (m, 4H) ppm;  $^{13}\text{C}$  NMR (101 MHz,  $\text{CDCl}_3$ )  $\delta = 206.1, 171.2, 162.5, 136.4, 129.8, 119.3, 118.9, 118.6, 64.0,$

37.6, 28.1, 21.0, 20.7 ppm; HRMS (ESI): calcd. for  $\text{C}_{13}\text{H}_{16}\text{O}_4$   $[\text{M}+\text{Na}]^+$ : 259.0941, found:259.0947.

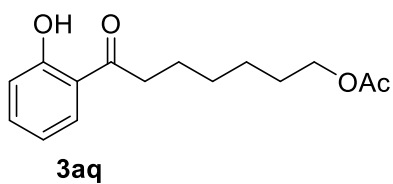

*7-(2-Hydroxyphenyl)-7-oxoheptyl acetate (3aq)* was isolated through column chromatography on silica gel with petroleum ether to the mixture eluent of petroleum ether and ethyl acetate (10:1) as a colorless oil (47 mg, 89 % yield).  $^1\text{H}$  NMR (400 MHz,  $\text{CDCl}_3$ )  $\delta = 12.38$  (s, 1H), 7.76 (dd,  $J = 8.1, 1.7$  Hz, 1H), 7.50-7.42 (m, 1H), 6.98 (dd,  $J = 8.4, 1.1$  Hz, 1H), 6.94-6.86 (m, 1H), 4.07 (t,  $J = 6.7$  Hz, 2H), 3.00 (t,  $J = 7.4$  Hz, 2H),

2.05 (s, 3H), 1.85-1.58 (m, 4H), 1.51-1.37 (m, 4H) ppm;  $^{13}\text{C}$  NMR (101 MHz,  $\text{CDCl}_3$ )  $\delta = 206.7, 171.2, 162.5, 136.3, 129.9, 119.3, 118.9, 118.6, 64.4, 38.2, 28.9, 28.5, 25.8, 24.3, 21.0$  ppm; HRMS (ESI): calcd. for  $\text{C}_{15}\text{H}_{21}\text{O}_4$   $[\text{M}+\text{H}]^+$ : 265.1434, found:265.1439.

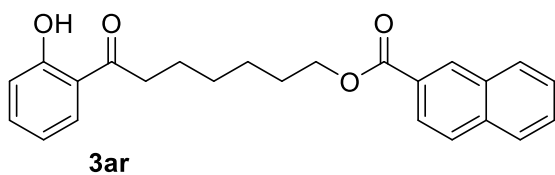

*7-(2-Hydroxyphenyl)-7-oxoheptyl 2-naphthoate (3ar)* was isolated through column chromatography on silica gel with petroleum ether to the mixture eluent of petroleum ether and ethyl acetate (10:1) as a colorless oil (48 mg, 64 % yield).  $^1\text{H}$  NMR (400 MHz,  $\text{CDCl}_3$ )  $\delta = 12.39$  (s, 1H), 8.60 (d,  $J = 1.6$  Hz, 1H), 8.06 (dd,  $J = 8.6, 1.7$  Hz, 1H), 7.95 (d,  $J = 8.0$

Hz, 1H), 7.90-7.85 (m, 2H), 7.74 (dd,  $J = 8.1, 1.7$  Hz, 1H), 7.61-7.50 (m, 2H), 7.49-7.41 (m, 1H), 6.98 (dd,  $J = 8.4, 1.1$  Hz, 1H), 6.90-6.81 (m, 1H), 4.39 (t,  $J = 6.6$  Hz, 2H), 3.00 (t,  $J = 7.4$  Hz, 2H), 1.91-1.73 (m, 4H), 1.61-1.42 (m, 4H) ppm;  $^{13}\text{C}$  NMR (101 MHz,  $\text{CDCl}_3$ )  $\delta = 206.7, 166.8, 162.5, 136.3, 135.5, 132.5, 131.0, 130.0, 129.4, 128.22, 128.15, 127.8, 127.7, 126.6, 125.3, 119.3, 118.9, 118.6, 65.1, 38.2, 29.0, 28.7, 26.0, 24.3$  ppm; HRMS (EI): calcd. for  $\text{C}_{24}\text{H}_{25}\text{O}_4$   $[\text{M}+\text{H}]^+$ : 377.1747, found: 377.1753.

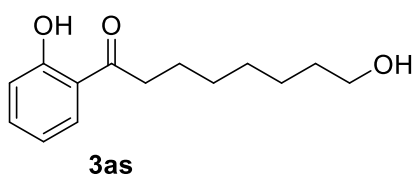

*8-Hydroxy-1-(2-hydroxyphenyl)octan-1-one (3as)* was isolated through column chromatography on silica gel with petroleum ether to the mixture eluent of petroleum ether and ethyl acetate (10:1) as a colorless oil (24 mg, 51 % yield).  $^1\text{H}$  NMR (500 MHz,  $\text{CDCl}_3$ )  $\delta = 12.39$  (s, 1H), 7.77 (dd,  $J = 8.1, 1.7$  Hz, 1H), 7.50-7.43 (m, 1H), 6.98 (dd,  $J = 8.4, 1.1$  Hz, 1H), 6.94- 6.87 (m, 1H), 3.65 (t,  $J = 6.6$  Hz, 2H), 2.99 (t,  $J = 7.4$

Hz, 2H), 1.81-1.70 (m, 2H), 1.57 (q,  $J = 6.8$  Hz, 2H), 1.44-1.34 (m, 6H) ppm;  $^{13}\text{C}$  NMR (126 MHz,  $\text{CDCl}_3$ )  $\delta = 206.9, 162.5, 136.2, 130.0, 119.3, 118.9, 118.6, 63.0, 38.3, 32.7, 29.24, 29.21, 25.6, 24.4$  ppm; HRMS (ESI): calcd. for  $\text{C}_{14}\text{H}_{21}\text{O}_3$   $[\text{M}+\text{H}]^+$ : 237.1485, found: 237.1487.

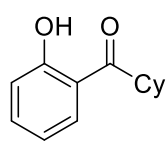

**3at**

*Cyclohexyl(2-hydroxyphenyl)methanone (3at)* was isolated through column chromatography on silica gel (petroleum ether: EtOAc= 20:1) as a colorless oil (26 mg, 64 % yield).  $^1\text{H}$  NMR (400 MHz,  $\text{CDCl}_3$ )  $\delta = 12.59$  (s, 1H), 7.81-7.74 (m, 1H), 7.49-7.42 (m, 1H), 6.99 (d,  $J = 8.4$  Hz, 1H), 6.90 (t,  $J = 7.6$  Hz, 1H), 3.38-3.23 (m, 1H), 1.93-1.83 (m, 4H), 1.80-1.71 (m, 1H), 1.55 (dd,  $J = 12.1, 3.4$  Hz, 2H), 1.47-1.36 (m, 2H), 1.34-1.20 (m, 1H) ppm;  $^{13}\text{C}$  NMR (101 MHz,  $\text{CDCl}_3$ )  $\delta = 210.2, 163.2, 136.2, 129.8, 118.78, 118.76, 118.2, 45.3, 29.6$  (2C), 25.9, 25.8 (2C) ppm;

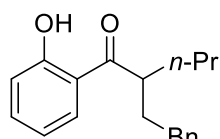

**3au**

*1-(2-Hydroxyphenyl)-2-phenethylpentan-1-one (3au)* was isolated through column chromatography on silica gel (petroleum ether: EtOAc= 20:1) as a colorless oil (28 mg, 50 % yield).  $^1\text{H}$  NMR (500 MHz,  $\text{CDCl}_3$ )  $\delta = 12.69$  (s, 1H), 7.60 (dd,  $J = 8.1, 1.5$  Hz, 1H), 7.51-7.44 (m, 1H), 7.29-7.23 (m, 2H), 7.22-7.16 (m, 1H), 7.15-7.09 (m, 2H), 7.00 (dd,  $J = 8.4, 1.1$  Hz, 1H), 6.90-6.81 (m, 1H), 3.53-3.36 (m, 1H), 2.67-2.52 (m, 2H), 2.19-2.04 (m, 1H), 1.86-1.73 (m, 2H), 1.60-1.47 (m, 1H), 1.29 (q,  $J = 7.6$  Hz, 2H), 0.87 (t,  $J = 7.3$  Hz, 3H) ppm;  $^{13}\text{C}$  NMR (101 MHz,  $\text{CDCl}_3$ )  $\delta = 210.6, 163.1, 141.5, 136.4, 129.9, 128.5$  (2C), 128.4 (2C), 126.0, 119.6, 118.8, 118.7, 44.4, 34.9, 34.0, 33.7, 20.7, 14.2 ppm; HRMS (ESI): calcd. for  $\text{C}_{19}\text{H}_{23}\text{O}_2$   $[\text{M}+\text{H}]^+$ : 283.1693 found: 283.1697.

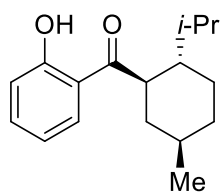

**3av**

*(2-Hydroxyphenyl)((1R,2S,5R)-2-isopropyl-5-methylcyclohexyl)methanone (3av)* was isolated through column chromatography on silica gel (petroleum ether: EtOAc= 5:1) as a colorless oil (37 mg, 71 % yield).  $^1\text{H}$  NMR (500 MHz,  $\text{CDCl}_3$ )  $\delta = 12.78$  (s, 1H), 7.85 (dd,  $J = 8.1, 1.5$  Hz, 1H), 7.50-7.45 (m, 1H), 7.00 (dd,  $J = 8.4, 1.1$  Hz, 1H), 6.94-6.87 (m, 1H), 3.40 (d,  $J = 3.3$  Hz, 1H), 1.90-1.82 (m, 2H), 1.83-1.75 (m, 2H), 1.61 (s, 1H), 1.55-1.42 (m, 1H), 1.20-1.10 (m, 2H), 1.08-0.97 (m, 1H), 0.89 (d,  $J = 6.8$  Hz, 3H), 0.73 (d,  $J = 6.9$  Hz, 3H) ppm;  $^{13}\text{C}$  NMR (101 MHz,  $\text{CDCl}_3$ )  $\delta = 211.0, 163.2, 136.4, 129.6, 119.2, 118.9, 118.8, 47.4, 43.7, 40.2, 34.6, 32.7, 28.9, 24.1, 22.3, 21.5, 16.6$  ppm; HRMS (ESI): calcd. for  $\text{C}_{17}\text{H}_{25}\text{O}_2$   $[\text{M}+\text{H}]^+$ : 261.1849 found: 261.1852.

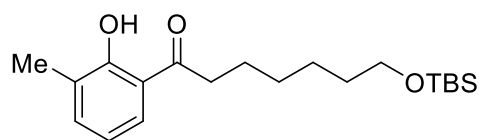

**3bk**

*7-((tert-Butyldimethylsilyl)oxy)-1-(2-hydroxy-3-methylphenyl)heptan-1-one (3bk)* was isolated through column chromatography on silica gel (petroleum ether: EtOAc= 20:1) as a colorless oil (30 mg, 43 % yield).  $^1\text{H}$  NMR (400 MHz,  $\text{CDCl}_3$ )  $\delta = 12.71$  (s, 1H), 7.65-7.55 (m, 1H), 7.33 (d,  $J = 7.3$  Hz, 1H), 6.79 (t,  $J = 7.7$  Hz, 1H), 3.61 (t,  $J = 6.4$  Hz, 2H), 2.98 (t,  $J = 7.5$  Hz, 2H), 2.26 (s, 3H), 1.84-1.69 (m, 2H), 1.59-1.48 (m, 2H), 1.44-1.35 (m, 4H), 0.89 (s, 9H), 0.05 (s, 6H) ppm;  $^{13}\text{C}$  NMR (101 MHz,  $\text{CDCl}_3$ )  $\delta = 207.1, 161.0, 136.9, 127.56, 118.6, 118.1, 63.1, 38.4, 32.7, 29.1, 26.0$  (3C), 25.7, 24.7, 18.9, 15.54, -5.3 (2C) ppm; HRMS (ESI): calcd. for  $\text{C}_{20}\text{H}_{35}\text{O}_3\text{Si}$   $[\text{M}+\text{H}]^+$ : 351.2350 found: 351.2352.

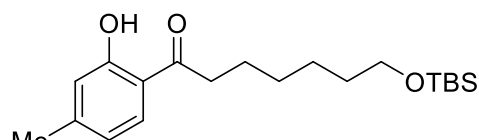

**3ck**

*7-((tert-Butyldimethylsilyl)oxy)-1-(2-hydroxy-4-methylphenyl)heptan-1-one (3ck)* was isolated through column chromatography on silica gel (petroleum ether: EtOAc= 20:1) as a colorless oil (56 mg, 80 % yield).  $^1\text{H}$  NMR (400 MHz,  $\text{CDCl}_3$ )  $\delta = 12.43$  (s, 1H), 7.63 (d,  $J = 8.2$  Hz, 1H), 6.78 (d,  $J = 1.5$  Hz, 1H), 6.70 (dd,  $J = 8.2, 1.7$  Hz, 1H), 3.61 (t,  $J = 6.4$  Hz, 2H), 2.94 (t,  $J = 7.5$  Hz, 2H), 2.34 (s, 3H), 1.80-1.64 (m, 2H), 1.62-1.47 (m, 2H), 1.46-1.31 (m, 4H), 0.89 (s, 9H), 0.05 (s, 6H) ppm;  $^{13}\text{C}$  NMR (101 MHz,  $\text{CDCl}_3$ )  $\delta = 206.3, 162.7, 147.8, 129.9, 120.1, 118.5, 117.1, 63.1, 38.1, 32.7, 29.1, 26.0$  (3C), 25.7, 24.7, 21.9, 18.4, -5.3 (2C) ppm; HRMS (ESI): calcd. for  $\text{C}_{20}\text{H}_{35}\text{O}_3\text{Si}$   $[\text{M}+\text{H}]^+$ : 351.2350 found: 351.2342.

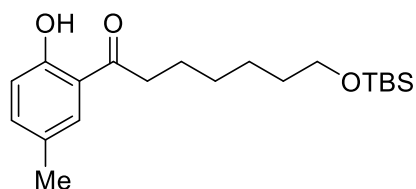

**3dk**

*7-((tert-Butyldimethylsilyl)oxy)-1-(2-hydroxy-5-methylphenyl)heptan-1-one (3dk)* was isolated through column chromatography on silica gel (petroleum ether: EtOAc= 20:1) as a colorless oil (68 mg, 97 % yield). <sup>1</sup>H NMR (400 MHz, CDCl<sub>3</sub>) δ= 12.22 (s, 1H), 7.63-7.49 (m, 1H), 7.31-7.23 (m, 1H), 6.88 (d, *J* = 8.4 Hz, 1H), 3.61 (t, *J* = 6.5 Hz, 2H), 2.97 (t, *J* = 7.4 Hz, 2H), 2.31 (s, 3H), 1.84-1.68 (m, 2H), 1.66-1.50 (m, 2H), 1.46-1.28 (m, 4H), 0.90 (s, 9H), 0.05 (s, 6H) ppm; <sup>13</sup>C NMR (101 MHz, CDCl<sub>3</sub>) δ= 206.7, 160.4, 137.2, 129.7, 127.9, 119.0, 118.3, 63.1, 38.2, 32.7, 29.1, 26.0, 25.7, 24.4, 20.6 (3C), 18.4, -5.6 (2C) ppm; HRMS (ESI): calcd. for C<sub>20</sub>H<sub>35</sub>O<sub>3</sub>Si [M+H]<sup>+</sup>: 351.2350 found: 351.2356.

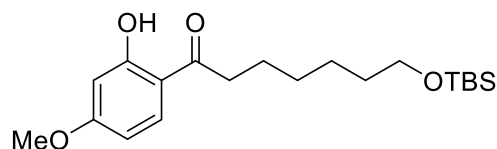

**3ek**

*7-((tert-Butyldimethylsilyl)oxy)-1-(2-hydroxy-4-methoxyphenyl)heptan-1-one (3ek)* was isolated through column chromatography on silica gel (petroleum ether: EtOAc= 10:1) as a colorless oil (31 mg, 42 % yield). <sup>1</sup>H NMR (400 MHz, CDCl<sub>3</sub>) δ= 12.90 (s, 1H), 7.80-7.59 (m, 1H), 6.56-6.30 (m, 2H), 3.84 (s, 3H), 3.61 (t, *J* = 6.5 Hz, 2H), 2.90 (t, *J* = 7.5 Hz, 2H), 1.80-1.67 (m, 2H), 1.57-1.46 (m, 2H), 1.44-1.35 (m, 4H), 0.89 (s, 9H), 0.05 (s, 6H) ppm; <sup>13</sup>C NMR (101 MHz, CDCl<sub>3</sub>) δ= 205.1, 165.9, 165.4, 131.6, 113.5, 107.6, 100.9, 63.1, 55.6, 38.0, 32.7, 29.2, 26.0 (3C), 25.7, 24.9, 18.4, -5.3 (2C) ppm; HRMS (ESI): calcd. for C<sub>20</sub>H<sub>35</sub>O<sub>4</sub>Si [M+H]<sup>+</sup>: 367.2299 found: 367.2300.

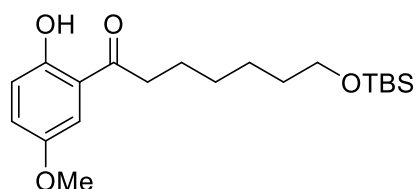

**3fk**

*7-((tert-Butyldimethylsilyl)oxy)-1-(2-hydroxy-5-methoxyphenyl)heptan-1-one (3fk)* was isolated through column chromatography on silica gel (petroleum ether: EtOAc= 10:1) as a colorless oil (54 mg, 74 % yield). <sup>1</sup>H NMR (400 MHz, CDCl<sub>3</sub>) δ= 11.98 (s, 1H), 7.20 (d, *J* = 3.0 Hz, 1H), 7.10 (dd, *J* = 9.1, 3.1 Hz, 1H), 6.92 (d, *J* = 9.0 Hz, 1H), 3.80 (s, 3H), 3.61 (t, *J* = 6.5 Hz, 2H), 2.96 (t, *J* = 7.4 Hz, 2H), 1.81-1.70 (m, 2H), 1.63-1.48 (m, 2H), 1.48-1.35 (m, 4H), 0.89 (s, 9H), 0.05 (s, 6H) ppm; <sup>13</sup>C NMR (101 MHz, CDCl<sub>3</sub>) δ= 206.3, 156.8, 151.6, 123.8, 119.3, 118.8, 112.9, 63.1, 56.0, 38.3, 32.7, 29.1, 26.0 (3C), 25.7, 24.3, 18.4, -5.3 (2C) ppm. HRMS (ESI): calcd. for C<sub>20</sub>H<sub>35</sub>O<sub>4</sub>Si [M+H]<sup>+</sup>: 367.2299 found: 367.2303.

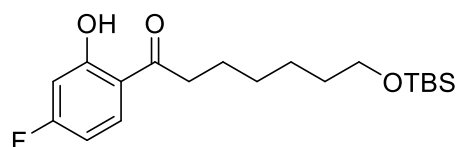

**3gk**

*7-((tert-Butyldimethylsilyl)oxy)-1-(4-fluoro-2-hydroxyphenyl)heptan-1-one (3gk)* was isolated through column chromatography on silica gel (petroleum ether: EtOAc= 20:1) as a colorless oil (63 mg, 89 % yield). <sup>1</sup>H NMR (400 MHz, CDCl<sub>3</sub>) δ= 12.73 (d, *J* = 1.5 Hz, 1H), 7.82-7.70 (m, 1H), 6.71-6.52 (m, 2H), 3.61 (t, *J* = 6.5 Hz, 2H), 2.94 (t, *J* = 7.4 Hz, 2H), 1.80-1.67 (m, 2H), 1.57-1.49 (m, 2H), 1.45-1.33 (m, 4H), 0.89 (s, 9H), 0.05 (s, 6H) ppm; <sup>13</sup>C NMR (101 MHz, CDCl<sub>3</sub>) δ= 205.7, 168.5 (C-F, <sup>1</sup>*J*<sub>C-F</sub> = 256.3 Hz), 166.0 (C-F, <sup>1</sup>*J*<sub>C-F</sub> = 256.3 Hz), 165.2 (C-F, <sup>3</sup>*J*<sub>C-F</sub> = 14.3 Hz), 165.0 (C-F, <sup>3</sup>*J*<sub>C-F</sub> = 14.3 Hz), 132.4 (C-F, <sup>3</sup>*J*<sub>C-F</sub> = 11.8 Hz), 132.3 (C-F, <sup>3</sup>*J*<sub>C-F</sub> = 11.8 Hz), 116.50 (C-F, <sup>4</sup>*J*<sub>C-F</sub> = 2.3 Hz), 116.47 (C-F, <sup>4</sup>*J*<sub>C-F</sub> = 2.3 Hz), 107.2 (C-F, <sup>2</sup>*J*<sub>C-F</sub> = 22.7 Hz), 107.0 (C-F, <sup>2</sup>*J*<sub>C-F</sub> = 22.7 Hz), 105.2 (C-F, <sup>2</sup>*J*<sub>C-F</sub> = 23.5 Hz), 104.9 (C-F, <sup>2</sup>*J*<sub>C-F</sub> = 23.5 Hz), 63.1, 38.3, 32.6, 29.1, 26.0 (3C), 25.7, 24.5, 18.4, -5.7 (2C) ppm; <sup>19</sup>F NMR (376 MHz, CDCl<sub>3</sub>) δ= -93.83- -108.03 (m, 1F) ppm; HRMS (ESI): calcd. for C<sub>19</sub>H<sub>32</sub>FO<sub>3</sub>Si [M+H]<sup>+</sup>: 355.2099 found: 355.2105

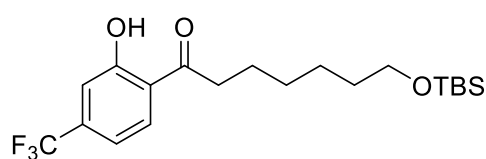

**3hk**

*7-((tert-Butyldimethylsilyl)oxy)-1-(2-hydroxy-4-(trifluoromethyl)phenyl)heptan-1-one (3hk)* was isolated through column chromatography on silica gel (petroleum ether: EtOAc= 20:1) as a colorless oil (65 mg, 80 % yield). <sup>1</sup>H NMR (400 MHz, CDCl<sub>3</sub>) δ= 12.42 (s, 1H), 7.88 (d, *J* = 8.3 Hz, 1H), 7.38-7.19 (m, 1H), 7.13 (dd, *J* = 8.4, 1.7 Hz, 1H), 3.62 (t, *J* = 6.4 Hz, 2H), 3.02 (t, *J* = 7.4 Hz, 2H), 1.84-1.72 (m, 2H), 1.59-1.50 (m, 2H), 1.47-1.35 (m, 4H), 0.89 (s, 9H), 0.05 (s, 6H) ppm; <sup>13</sup>C NMR (101 MHz, CDCl<sub>3</sub>) δ= 206.6, 162.3, 137.6 (C-F, <sup>2</sup>*J*<sub>C-F</sub> = 33.0 Hz), 137.3 (C-F, <sup>2</sup>*J*<sub>C-F</sub> = 33.0 Hz),

136.9 (C-F,  $^2J_{\text{C-F}} = 33.0$  Hz), 136.6 (C-F,  $^2J_{\text{C-F}} = 33.0$  Hz), 130.7, 127.1 (C-F,  $^1J_{\text{C-F}} = 273.7$  Hz), 124.4 (C-F,  $^1J_{\text{C-F}} = 273.7$  Hz), 121.7 (C-F,  $^1J_{\text{C-F}} = 273.7$  Hz), 121.2, 119.0 (C-F,  $^1J_{\text{C-F}} = 273.7$  Hz), 116.10 (C-F,  $^3J_{\text{C-F}} = 4.0$  Hz), 116.06 (C-F,  $^3J_{\text{C-F}} = 4.0$  Hz), 116.02 (C-F,  $^3J_{\text{C-F}} = 4.0$  Hz), 115.98 (C-F,  $^3J_{\text{C-F}} = 4.0$  Hz), 115.24 (C-F,  $^3J_{\text{C-F}} = 3.6$  Hz), 115.21 (C-F,  $^3J_{\text{C-F}} = 3.6$  Hz), 115.21 (C-F,  $^3J_{\text{C-F}} = 3.6$  Hz), 115.17 (C-F,  $^3J_{\text{C-F}} = 3.6$  Hz), 63.1, 38.6, 32.6, 29.0, 26.0 (3C), 25.6, 24.2, 18.4, -5.3 (2C) ppm;  $^{19}\text{F}$  NMR (376 MHz,  $\text{CDCl}_3$ )  $\delta = -63.91$  (s, 3F) ppm. HRMS (ESI): calcd. for  $\text{C}_{20}\text{H}_{32}\text{FO}_3\text{Si}$   $[\text{M}+\text{H}]^+$ : 405.2067 found: 405.2068

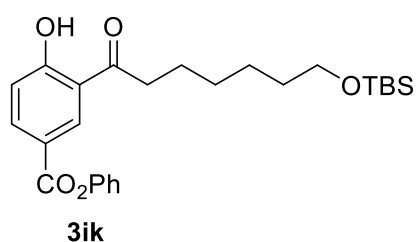

*Phenyl 3-(7-((tert-butyldimethylsilyl)oxy)heptanoyl)-4-hydroxybenzoate (3ik)* was isolated through column chromatography on silica gel (petroleum ether: EtOAc= 20:1) as a colorless oil (65 mg, 71 % yield).  $^1\text{H}$  NMR (500 MHz,  $\text{CDCl}_3$ )  $\delta = 12.92$  (s, 1H), 8.66 (t,  $J = 2.0$  Hz, 1H), 8.36-8.20 (m, 1H), 7.50-7.40 (m, 2H), 7.35-7.18 (m, 3H), 7.13-7.03 (m, 1H), 3.61 (t,  $J = 6.5$  Hz, 2H), 3.09 (t,  $J = 7.4$  Hz, 2H), 1.85-1.73 (m, 2H), 1.60-1.51 (m, 2H), 1.49-1.37 (m, 4H), 0.88 (s, 9H), 0.04 (s, 6H) ppm;  $^{13}\text{C}$  NMR (126 MHz,  $\text{CDCl}_3$ )  $\delta = 206.9, 166.7, 164.2, 150.9, 137.4, 133.2, 129.6$  (2C), 126.0,

121.7 (2C), 120.3, 119.04, 118.97, 63.1, 38.3, 32.7, 29.0, 26.0 (3C), 25.7, 24.2, 18.4, -5.3 (2C) ppm. HRMS (ESI): calcd. for  $\text{C}_{26}\text{H}_{37}\text{O}_5\text{Si}$   $[\text{M}+\text{H}]^+$ : 457.2405 found: 457.2414

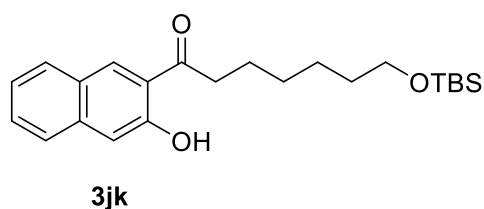

*7-((tert-Butyldimethylsilyl)oxy)-1-(3-hydroxynaphthalen-2-yl)heptan-1-one (3jk)* was isolated through column chromatography on silica gel (petroleum ether: EtOAc= 20:1) as a white solid (46 mg, 60 % yield).  $^1\text{H}$  NMR (400 MHz,  $\text{CDCl}_3$ )  $\delta = 11.70$  (s, 1H), 8.37 (s, 1H), 7.81 (d,  $J = 8.3$  Hz, 1H), 7.67 (d,  $J = 8.4$  Hz, 1H), 7.51 (t,  $J = 7.6$  Hz, 1H), 7.33 (t,  $J = 7.6$  Hz, 1H), 7.27 (d,  $J = 8.5$  Hz, 1H), 3.62 (t,  $J = 6.4$  Hz, 2H), 3.17 (t,  $J = 7.4$  Hz, 2H), 1.88-1.76 (m, 2H), 1.64-

1.50 (m, 2H), 1.52-1.39 (m, 4H), 0.90 (s, 9H), 0.05 (s, 6H) ppm;  $^{13}\text{C}$  NMR (101 MHz,  $\text{CDCl}_3$ )  $\delta = 207.1, 157.2, 138.1, 132.7, 129.6, 129.4, 126.8, 126.2, 124.0, 121.0, 112.3, 63.1, 38.5, 32.7, 29.1, 26.0$  (3C), 25.7, 24.6, 18.4, -5.2 (2C) ppm; HRMS (ESI): calcd. for  $\text{C}_{23}\text{H}_{35}\text{O}_3\text{Si}$   $[\text{M}+\text{H}]^+$ : 387.2350 found: 387.2357.

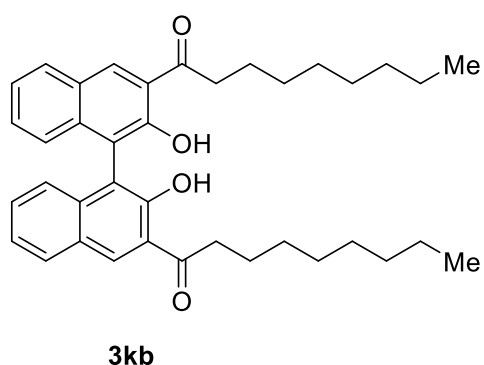

*1,1'-(2,2'-Dihydroxy-[1,1'-binaphthalene]-3,3'-diyl)bis(nonan-1-one) (3kb)* was isolated through column chromatography on silica gel (petroleum ether: EtOAc= 20:1) as a yellow solid (55 mg, 48 % yield).  $^1\text{H}$  NMR (500 MHz,  $\text{CDCl}_3$ )  $\delta = 11.70$  (s, 2H), 8.35 (s, 2H), 7.79 (d,  $J = 8.2$  Hz, 2H), 7.65 (d,  $J = 8.3$  Hz, 2H), 7.49 (t,  $J = 7.6$  Hz, 2H), 7.31 (t,  $J = 7.6$  Hz, 2H), 3.13 (t,  $J = 7.5$  Hz, 4H), 1.83-1.72 (m, 4H), 1.46-1.39 (m, 4H), 1.37-1.24 (m, 16H), 0.89 (t,  $J = 6.6$  Hz, 6H) ppm;  $^{13}\text{C}$  NMR (126 MHz,  $\text{CDCl}_3$ )  $\delta = 207.2$  (2C), 157.3 (2C), 138.1 (2C), 132.7 (2C), 129.6 (2C), 129.4 (2C), 126.8 (2C), 126.2 (2C), 124.0 (2C), 121.0 (2C), 112.3 (2C), 38.5 (2C), 31.9 (2C), 29.5 (2C), 29.4 (2C), 29.2 (2C), 24.6 (2C), 22.7 (2C), 14.1 (2C) ppm; HRMS (ESI): calcd. for  $\text{C}_{38}\text{H}_{47}\text{O}_4$   $[\text{M}+\text{H}]^+$ : 567.3469

found: 567.3469.

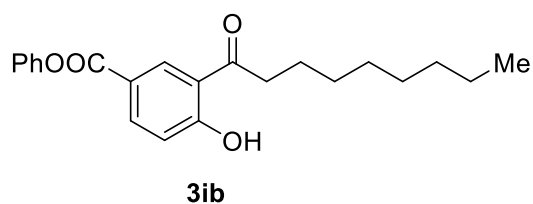

*Phenyl 4-hydroxy-3-nonanoylbenzoate (3ib)* was isolated through column chromatography on silica gel (petroleum ether: EtOAc= 20:1) as a colorless oil (87 mg, 86 % yield).  $^1\text{H}$  NMR (500 MHz,  $\text{CDCl}_3$ )  $\delta = 12.93$  (s, 1H), 8.65 (d,  $J = 2.1$  Hz, 1H), 8.28 (dd,  $J = 8.8, 2.2$  Hz, 1H), 7.44 (t,  $J = 7.9$  Hz, 2H), 7.28 (t,  $J = 7.5$  Hz, 1H), 7.21 (dd,  $J = 7.4, 1.6$  Hz, 2H), 7.07 (d,  $J = 8.8$  Hz, 1H), 3.08 (t,  $J = 7.4$  Hz, 2H), 1.85-1.70 (m, 2H), 1.45-1.37 (m, 2H), 1.39-

1.22 (m, 8H), 0.88 (t,  $J = 6.8$  Hz, 3H) ppm;  $^{13}\text{C}$  NMR (126 MHz,  $\text{CDCl}_3$ )  $\delta = 207.0, 166.7, 164.1, 150.8, 137.4, 133.2, 129.5$  (2C), 126.0, 121.7 (2C), 120.3, 119.00, 118.95, 38.4, 31.8, 29.4, 29.2, 29.1, 24.2, 22.7, 14.1 ppm; HRMS (ESI): calcd. for

C<sub>22</sub>H<sub>27</sub>O<sub>4</sub> [M+H]<sup>+</sup>: 355.1904 found: 355.1901.

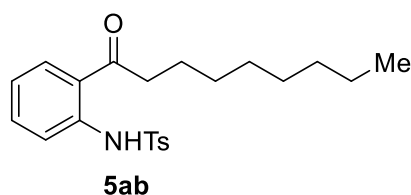

*4-Methyl-N-(2-nonanoylphenyl)benzenesulfonamide (5ab)* was isolated through column chromatography on silica gel (petroleum ether: EtOAc= 10:1) as a white solid (40 mg, 52 % yield). <sup>1</sup>H NMR (400 MHz, CDCl<sub>3</sub>) δ= 11.45 (s, 1H), 7.80 (dd, *J* = 7.9, 1.5 Hz, 1H), 7.75-7.66 (m, 3H), 7.49-7.38 (m, 1H), 7.21 (d, *J* = 8.0 Hz, 2H), 7.06 (t, *J* = 7.5 Hz, 1H), 2.87 (t, *J* = 7.4 Hz, 2H), 2.36 (s, 3H), 1.65-1.52 (m, 2H), 1.36-1.25 (m, 10H), 0.89 (t, *J* = 6.8 Hz, 3H) ppm; <sup>13</sup>C NMR (101 MHz, CDCl<sub>3</sub>) δ= 204.8, 143.7, 139.9, 136.6, 134.5, 131.0, 129.6 (2C), 127.2 (2C), 122.7, 122.5, 119.6, 39.7, 31.8, 29.4, 29.21, 29.15, 24.5, 22.7, 21.5, 14.1 ppm; HRMS (ESI): calcd. for C<sub>22</sub>H<sub>30</sub>NO<sub>3</sub>S [M+H]<sup>+</sup>: 388.1941 found: 388.1945.

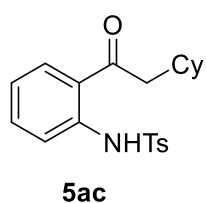

*N-(2-(2-cyclohexylacetyl)phenyl)-4-methylbenzenesulfonamide (5ac)* was isolated through column chromatography on silica gel (petroleum ether: EtOAc= 10:1) as a white solid (38 mg, 51% yield). <sup>1</sup>H NMR (400 MHz, CDCl<sub>3</sub>) δ= 11.51 (s, 1H), 7.79 (dd, *J* = 8.0, 1.5 Hz, 1H), 7.76-7.68 (m, 3H), 7.49-7.40 (m, 1H), 7.20 (d, *J* = 8.1 Hz, 2H), 7.11-7.02 (m, 1H), 2.73 (d, *J* = 6.8 Hz, 2H), 2.35 (s, 3H), 1.91-1.77 (m, 1H), 1.73-1.56 (m, 4H), 1.30-1.10 (m, 4H), 1.01-0.85 (m, 2H) ppm; <sup>13</sup>C NMR (101 MHz, CDCl<sub>3</sub>) δ= 204.5, 143.7, 140.1, 136.7, 134.6, 131.2, 129.6 (2C), 127.2 (2C), 122.7, 122.6, 119.6, 47.3, 34.8, 33.3 (2C), 26.2, 26.1 (2C), 21.5 ppm; HRMS (ESI): calcd. for C<sub>21</sub>H<sub>25</sub>NO<sub>3</sub>SNa [M+Na]<sup>+</sup>: 394.1447 found: 394.1445.

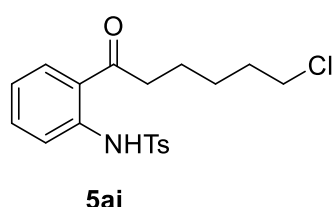

*N-(2-(6-chlorohexanoyl)phenyl)-4-methylbenzenesulfonamide (5ai)* was isolated through column chromatography on silica gel (petroleum ether: EtOAc= 10:1) as a white solid (46 mg, 61 % yield). <sup>1</sup>H NMR (500 MHz, CDCl<sub>3</sub>) δ= 11.41 (s, 1H), 7.80 (dd, *J* = 8.1, 1.5 Hz, 1H), 7.73 (s, 1H), 7.73-7.67 (m, 2H), 7.49-7.41 (m, 1H), 7.22 (d, *J* = 8.0 Hz, 2H), 7.06 (t, *J* = 7.7 Hz, 1H), 3.56 (t, *J* = 6.6 Hz, 2H), 2.91 (t, *J* = 7.3 Hz, 2H), 2.36 (s, 3H), 1.85-1.75 (m, 2H), 1.69-1.62 (m, 2H), 1.53-1.44 (m, 2H) ppm; <sup>13</sup>C NMR (126 MHz, CDCl<sub>3</sub>) δ= 204.1, 143.8, 140.0, 136.7, 134.7, 130.9, 129.6 (2C), 127.3 (2C), 122.7, 122.4, 119.6, 44.8, 39.4, 32.4, 26.4, 23.5, 21.5 ppm; HRMS (ESI): calcd. for C<sub>19</sub>H<sub>22</sub>ClNO<sub>3</sub>SNa [M+Na]<sup>+</sup>: 402.0901 found: 402.0904

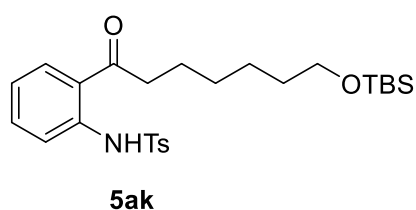

*N-(2-(7-((tert-butyldimethylsilyl)oxy)heptanoyl)phenyl)-4-methylbenzenesulfonamide (5ak)* was isolated through column chromatography on silica gel (petroleum ether: EtOAc= 10:1) as a white solid (55 mg, 56 % yield). <sup>1</sup>H NMR (400 MHz, CDCl<sub>3</sub>) δ= 11.45 (s, 1H), 7.80 (dd, *J* = 8.1, 1.5 Hz, 1H), 7.75-7.65 (m, 3H), 7.49-7.39 (m, 1H), 7.25- 7.17 (m, 2H), 7.11-7.02 (m, 1H), 3.61 (t, *J* = 6.5 Hz, 2H), 2.87 (t, *J* = 7.4 Hz, 2H), 2.35 (s, 3H), 1.68-1.58 (m, 2H), 1.57-1.47 (m, 2H), 1.38-1.31 (m, 4H), 0.90 (s, 9H), 0.06 (s, 6H) ppm; <sup>13</sup>C NMR (101 MHz, CDCl<sub>3</sub>) δ= 204.7, 143.8, 140.0, 136.6, 134.6, 131.0, 129.6 (2C), 127.3 (2C), 122.7, 122.4, 119.6, 63.1, 39.6, 32.7, 29.0, 26.0 (3C), 25.7, 24.4, 21.5, 18.4, -5.2 (2C) ppm; HRMS (ESI): calcd. for C<sub>26</sub>H<sub>40</sub>NO<sub>4</sub>SSi [M+H]<sup>+</sup>: 490.2442 found: 490.2437

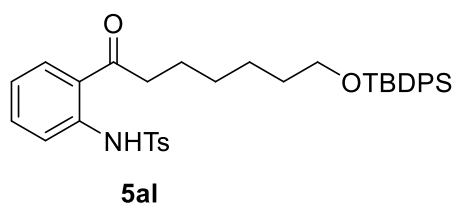

*N-(2-(7-((tert-butyldiphenylsilyl)oxy)heptanoyl)phenyl)-4-methylbenzenesulfonamide (5al)* was isolated through column chromatography on silica gel (petroleum ether: EtOAc= 10:1) as a white solid (75 mg, 61 % yield). <sup>1</sup>H NMR (400 MHz, CDCl<sub>3</sub>) δ= 11.46 (s, 1H), 7.78 (dd, *J* = 8.0, 1.6 Hz, 1H), 7.75-7.63 (m, 7H), 7.48-7.41 (m, 2H), 7.43-7.33 (m, 5H), 7.19 (d, *J* = 8.0 Hz, 2H), 7.05 (s, 1H), 3.67 (t, *J* = 6.4 Hz, 2H), 2.84 (t, *J* = 7.4 Hz, 2H), 2.33 (s, 3H), 1.64-1.53 (m, 4H), 1.42-1.33 (m, 2H), 1.35 -1.22 (m, 2H), 1.05 (s, 9H) ppm; <sup>13</sup>C NMR (101 MHz, CDCl<sub>3</sub>) δ= 204.6, 143.7, 139.9, 136.6, 135.5 (4C), 134.6, 134.0, 130.9, 129.6 (2C), 129.5 (2C), 127.6 (4C), 127.2 (2C), 122.7 (2C), 122.4, 119.6, 63.8, 39.6, 32.3, 28.9, 26.9 (3C), 25.6,

24.3, 21.5, 19.2 ppm; HRMS (ESI): calcd. for C<sub>36</sub>H<sub>43</sub>NO<sub>4</sub>SSiNa [M+Na]<sup>+</sup>: 636.2574 found: 636.2571

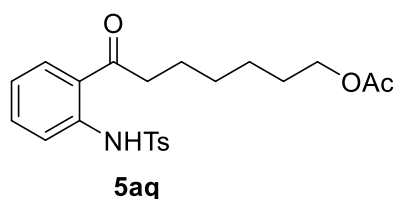

7-(2-((4-Methylphenyl)sulfonamido)phenyl)-7-oxoheptyl acetate (**5aq**) was isolated through column chromatography on silica gel (petroleum ether: EtOAc= 10:1) as a white solid (50 mg, 60 % yield). <sup>1</sup>H NMR (500 MHz, CDCl<sub>3</sub>) δ= 11.45 (s, 1H), 7.80 (dd, *J* = 8.1, 1.5 Hz, 1H), 7.75-7.66 (m, 3H), 7.44 (d, *J* = 1.6 Hz, 1H), 7.22 (d, *J* = 7.9 Hz, 2H), 7.08-7.02 (m, 1H), 4.07 (t, *J* = 6.7 Hz, 2H), 2.89 (t, *J* = 7.3 Hz, 2H), 2.36 (s, 3H), 2.05 (s, 3H), 1.70-1.61 (m, 4H), 1.43-1.29 (m, 4H) ppm; <sup>13</sup>C NMR (126 MHz, CDCl<sub>3</sub>) δ= 204.4, 171.2, 143.8, 140.0, 136.7, 134.6, 131.0, 129.6 (2C), 127.3 (2C), 122.7, 122.3, 119.5, 64.4, 39.5, 28.8, 28.5, 25.8, 24.2, 21.5, 21.0 ppm; HRMS (ESI): calcd. for C<sub>22</sub>H<sub>27</sub>NO<sub>5</sub>SSiNa [M+Na]<sup>+</sup>: 440.1502 found: 440.1506

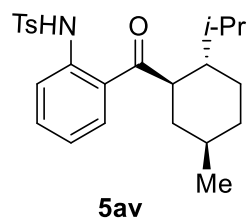

*N*-(2-((1*R*,2*S*,5*R*)-2-isopropyl-5-methylcyclohexane-1-carbonyl)phenyl)-4-methylbenzenesulfonamide (**5av**) was isolated through column chromatography on silica gel (petroleum ether: EtOAc= 10:1) as a white solid (56 mg, 68 % yield). <sup>1</sup>H NMR (500 MHz, CDCl<sub>3</sub>) δ= 11.55 (s, 1H), 7.86 (dd, *J* = 8.1, 1.5 Hz, 1H), 7.78 (dd, *J* = 8.4, 1.1 Hz, 1H), 7.72-7.65 (m, 2H), 7.47 (d, *J* = 1.5 Hz, 1H), 7.18 (d, *J* = 8.1 Hz, 2H), 7.10 (d, *J* = 7.1 Hz, 1H), 3.28 (d, *J* = 3.2 Hz, 1H), 2.34 (s, 3H), 1.82-1.71 (m, 3H), 1.61-1.52 (m, 1H), 1.44-1.34 (m, 2H), 1.08 (dd, *J* = 12.5, 3.1 Hz, 1H), 1.03-0.93 (m, 1H), 0.91 (d, *J* = 12.6 Hz, 1H), 0.86 (d, *J* = 3.2 Hz, 3H), 0.85 (d, *J* = 3.5 Hz, 3H), 0.61 (d, *J* = 7.0 Hz, 3H) ppm; <sup>13</sup>C NMR (126 MHz, CDCl<sub>3</sub>) δ= 208.8, 143.6, 140.4, 136.8, 134.6, 130.4, 129.6 (2C), 127.2 (2C), 123.0, 122.8, 120.3, 48.9, 43.8, 40.2, 34.5, 32.6, 28.8, 24.0, 22.3, 21.6, 21.5, 16.5 ppm; HRMS (ESI): calcd. for C<sub>24</sub>H<sub>31</sub>NO<sub>3</sub>SSiNa [M+Na]<sup>+</sup>: 436.1917 found: 436.1926.

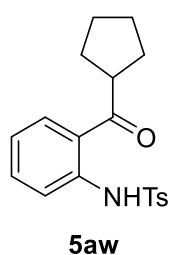

*N*-(2-(cyclopentanecarbonyl)phenyl)-4-methylbenzenesulfonamide (**5aw**) was isolated through column chromatography on silica gel (petroleum ether: EtOAc= 10:1) as a white solid (35 mg, 51 % yield). <sup>1</sup>H NMR (500 MHz, CDCl<sub>3</sub>) δ= 11.41 (s, 1H), 7.81 (dd, *J* = 8.1, 1.4 Hz, 1H), 7.73-7.65 (m, 3H), 7.48-7.41 (m, 1H), 7.20 (d, *J* = 8.0 Hz, 2H), 7.11-7.04 (m, 1H), 3.75-3.46 (m, 1H), 2.35 (s, 3H), 1.90-1.76 (m, 2H), 1.75-1.53 (m, 6H) ppm; <sup>13</sup>C NMR (126 MHz, CDCl<sub>3</sub>) δ= 207.0, 143.7, 140.2, 136.7, 134.3, 131.2, 129.6 (2C), 127.2 (2C), 122.9, 122.7, 120.2, 47.1, 30.1 (2C), 26.3 (2C), 21.5 ppm; HRMS (ESI): calcd. for C<sub>19</sub>H<sub>21</sub>NO<sub>3</sub>SSiNa [M+Na]<sup>+</sup>: 366.1134 found: 366.1147.

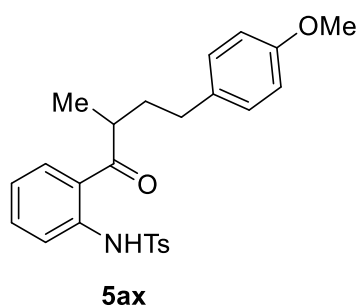

*N*-(2-(4-(4-methoxyphenyl)-2-methylbutanoyl)phenyl)-4-methylbenzenesulfonamide (**5ax**) was isolated through column chromatography on silica gel (petroleum ether: EtOAc= 10:1) as a white solid (54 mg, 62 % yield). <sup>1</sup>H NMR (500 MHz, CDCl<sub>3</sub>) δ= 11.45 (s, 1H), 7.74 (d, *J* = 8.4 Hz, 1H), 7.70 (d, *J* = 8.0 Hz, 2H), 7.60 (d, *J* = 8.0 Hz, 1H), 7.45 (t, *J* = 7.9 Hz, 1H), 7.16 (d, *J* = 7.9 Hz, 2H), 7.03-6.94 (m, 3H), 6.80 (d, *J* = 8.1 Hz, 2H), 3.78 (s, 3H), 3.41-3.32 (m, 1H), 2.50-2.40 (m, 2H), 2.27 (s, 3H), 2.04-1.92 (m, 1H), 1.64-1.50 (m, 1H), 1.09 (d, *J* = 6.8 Hz, 3H) ppm; <sup>13</sup>C NMR (126 MHz, CDCl<sub>3</sub>) δ= 208.4, 158.0, 143.8, 140.4, 136.7, 134.6, 133.4, 130.7, 129.6 (2C), 129.4 (2C), 127.2 (2C), 122.8, 122.1, 120.2, 113.8 (2C), 55.3, 40.3, 35.5, 32.4, 21.5, 17.4 ppm; HRMS (ESI): calcd. for C<sub>25</sub>H<sub>27</sub>NO<sub>4</sub>SSiNa [M+Na]<sup>+</sup>: 460.1553 found: 460.1559.

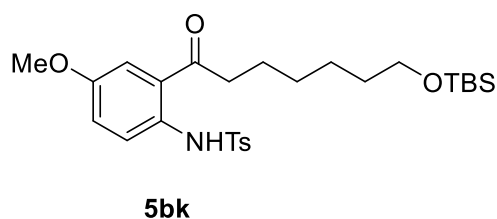

*N*-(2-(7-((*tert*-butyldimethylsilyl)oxy)heptanoyl)-4-methoxyphenyl)-4-methylbenzenesulfonamide (**5bk**) was isolated through column chromatography on silica gel (petroleum ether: EtOAc= 5:1) as a white solid (76 mg, 73 % yield). <sup>1</sup>H NMR (400 MHz, CDCl<sub>3</sub>) δ= 10.59 (s, 1H), 7.68 (d, *J* = 9.0 Hz, 1H), 7.57 (d, *J* = 8.4 Hz, 2H), 7.21 (d, *J* = 2.9 Hz, 1H), 7.20-7.13 (m, 2H), 7.04 (dd, *J* = 9.1, 2.9 Hz, 1H), 3.80 (s, 3H), 3.61 (t, *J* = 6.5 Hz, 2H), 2.71 (t, *J* = 7.4 Hz, 2H),

2.34 (s, 3H), 1.57-1.47 (m, 4H), 1.38-1.26 (m, 4H), 0.90 (s, 9H), 0.06 (s, 6H) ppm;  $^{13}\text{C}$  NMR (101 MHz,  $\text{CDCl}_3$ )  $\delta$  = 204.1, 155.4, 143.5, 136.3, 132.2, 129.4 (2C), 127.2 (2C), 125.3, 123.5, 119.4, 115.8, 63.1, 55.7, 39.6, 32.7, 29.0, 26.0 (3C), 25.7, 24.2, 21.5, 18.4, -5.3 (2C); HRMS (ESI): calcd. for  $\text{C}_{27}\text{H}_{41}\text{NO}_5\text{SSiNa}[\text{M}+\text{Na}]^+$ : 542.2367 found: 542.2368.

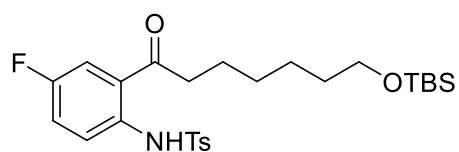

**5ck**

*N*-(2-(7-((*tert*-Butyldimethylsilyl)oxy)heptanoyl)-4-fluorophenyl)-4-methylbenzenesulfonamide (**5ck**) was isolated through column chromatography on silica gel (petroleum ether: EtOAc = 10:1) as a white solid (64 mg, 63 % yield).  $^1\text{H}$  NMR (400 MHz,  $\text{CDCl}_3$ )  $\delta$  = 10.96 (s, 1H), 7.73 (dd,  $J$  = 9.2, 4.9 Hz, 1H), 7.67-7.60 (m, 2H), 7.43 (dd,  $J$  = 9.1, 3.0 Hz, 1H), 7.24-7.16 (m, 3H), 3.61 (t,  $J$  = 6.5 Hz, 2H), 2.77 (t,  $J$  = 7.4 Hz, 2H), 2.36 (s, 3H), 1.62-1.48 (m, 4H), 1.39-1.28 (m, 4H), 0.90

(s, 9H), 0.06 (s, 6H) ppm;  $^{13}\text{C}$  NMR (101 MHz,  $\text{CDCl}_3$ )  $\delta$  = 203.39 (C-F,  $^4J_{\text{C-F}}$  = 2.2 Hz), 203.37 (C-F,  $^4J_{\text{C-F}}$  = 2.2 Hz), 159.1 (C-F,  $^1J_{\text{C-F}}$  = 244.7 Hz), 156.7 (C-F,  $^1J_{\text{C-F}}$  = 244.7 Hz), 143.9, 136.2, 135.8 (C-F,  $^4J_{\text{C-F}}$  = 2.6 Hz), 135.7 (C-F,  $^4J_{\text{C-F}}$  = 2.6 Hz), 129.6 (2C), 127.2 (2C), 124.3 (C-F,  $^3J_{\text{C-F}}$  = 5.8 Hz), 124.2 (C-F,  $^3J_{\text{C-F}}$  = 5.8 Hz), 122.7 (C-F,  $^3J_{\text{C-F}}$  = 7.4 Hz), 122.6 (C-F,  $^3J_{\text{C-F}}$  = 7.4 Hz), 121.7 (C-F,  $^2J_{\text{C-F}}$  = 22.4 Hz), 121.5 (C-F,  $^2J_{\text{C-F}}$  = 22.4 Hz), 116.9 (C-F,  $^2J_{\text{C-F}}$  = 23.4 Hz), 116.7 (C-F,  $^2J_{\text{C-F}}$  = 23.4 Hz), 63.0, 39.7, 32.6, 28.9, 26.0 (3C), 25.6, 24.1, 21.5, 18.4, -5.3 (2C) ppm;  $^{19}\text{F}$  NMR (376 MHz,  $\text{CDCl}_3$ )  $\delta$  = -111.55 - -121.87 (m, 1F) ppm; HRMS (ESI): calcd. for  $\text{C}_{26}\text{H}_{39}\text{FNO}_4\text{SSi}[\text{M}+\text{H}]^+$ : 508.2353 found: 508.2353.

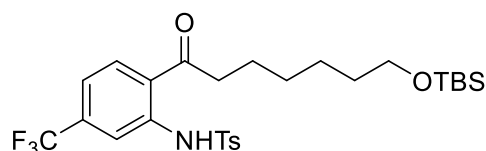

**5dk**

*N*-(2-(7-((*tert*-Butyldimethylsilyl)oxy)heptanoyl)-5-(trifluoromethyl)phenyl)-4-methylbenzenesulfonamide (**5dk**) was isolated through column chromatography on silica gel (petroleum ether: EtOAc = 10:1) as a white solid (39 mg, 35 % yield).  $^1\text{H}$  NMR (400 MHz,  $\text{CDCl}_3$ )  $\delta$  = 11.44 (s, 1H), 8.05-7.96 (m, 1H), 7.91 (d,  $J$  = 8.3 Hz, 1H), 7.80-7.69 (m, 2H), 7.31-7.21 (m, 3H), 3.61 (t,  $J$  = 6.4 Hz, 2H), 2.91 (t,  $J$  = 7.4 Hz, 2H), 2.37 (s, 3H), 1.71-1.60 (m, 2H), 1.57-1.47 (m, 2H),

1.39-1.32 (m, 4H), 0.90 (s, 9H), 0.05 (s, 6H) ppm;  $^{13}\text{C}$  NMR (101 MHz,  $\text{CDCl}_3$ )  $\delta$  = 204.0, 144.3, 140.4, 136.1, 135.8 (C-F,  $^2J_{\text{C-F}}$  = 33.2 Hz), 135.5 (C-F,  $^2J_{\text{C-F}}$  = 33.2 Hz), 131.5, 129.8 (2C), 127.3 (2C), 124.3 (C-F,  $^1J_{\text{C-F}}$  = 274.7 Hz), 124.1, 121.6 (C-F,  $^1J_{\text{C-F}}$  = 274.7 Hz), 118.90 (C-F,  $^3J_{\text{C-F}}$  = 3.6 Hz), 118.87 (C-F,  $^3J_{\text{C-F}}$  = 3.6 Hz), 116.3 (C-F,  $^3J_{\text{C-F}}$  = 3.9 Hz), 116.2 (C-F,  $^3J_{\text{C-F}}$  = 3.9 Hz), 63.1, 39.9, 32.6, 28.9, 26.0 (3C), 25.6, 24.2, 21.6, 18.4, 5.3 (2C) ppm;  $^{19}\text{F}$  NMR (376 MHz,  $\text{CDCl}_3$ )  $\delta$  = -63.76 (s, 3F) ppm; HRMS (ESI): calcd. for  $\text{C}_{27}\text{H}_{39}\text{F}_3\text{NO}_4\text{SSi}[\text{M}+\text{H}]^+$ : 558.2321 found: 558.2322.

## Derivatizations of the Products

### Synthesis of 2-Nonanoylphenyl Trifluoromethanesulfonate (**6**)

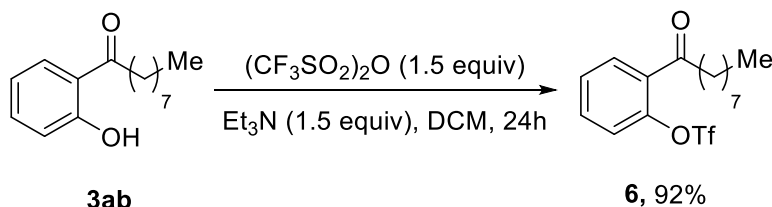

The phenol **3ab** (93.7 mg, 0.40 mmol, 1 equiv) was dissolved in DCM (0.8 mL), to which  $\text{Et}_3\text{N}$  (60.7 mg, 0.60 mmol, 1.5 equiv) was added dropwise. After cooling to 0  $^\circ\text{C}$ , trifluoromethanesulfonic anhydride (169.3 mg, 0.60 mmol, 1.5 equiv) was added dropwise to the mixture. After stirring at room temperature for 24 h, the reaction was quenched with water. The organic layer was separated and the aqueous phase was extracted with EtOAc. The combined organic phases were washed with water and saturated aqueous NaCl solution, dried over  $\text{Na}_2\text{SO}_4$ , filtered and concentrated under reduced pressure. The residue was purified through column chromatography on silica gel with the mixture eluent of petroleum ether and ethyl acetate (50:1) to

give the title compound **6** as a yellow oil (134.8 mg, 92 % yield). <sup>1</sup>H NMR (400 MHz, CDCl<sub>3</sub>) δ= 7.76 (dd, *J* = 7.7, 1.8 Hz, 1H), 7.62-7.55 (m, 1H), 7.51-7.44 (m, 1H), 7.34 (dd, *J* = 8.3, 1.1 Hz, 1H), 2.93 (t, *J* = 7.3 Hz, 2H), 1.78-1.66 (m, 2H), 1.39-1.23 (m, 10H), 0.87 (t, *J* = 7.0 Hz, 3H) ppm; <sup>13</sup>C NMR (101 MHz, CDCl<sub>3</sub>) δ= 199.6, 146.6, 133.2, 132.6, 130.2, 128.5, 122.7, 118.6 (q, *J* = 320.5 Hz), 41.8, 31.8, 29.3, 29.1 (2C), 23.9, 22.6, 14.1 ppm; HRMS (ESI): calcd. for C<sub>16</sub>H<sub>21</sub>F<sub>3</sub>O<sub>4</sub>SNa [M+Na]<sup>+</sup>: 389.1005 found: 389.1011.

### Synthesis of 1-([1,1'-Biphenyl]-2-yl)nonan-1-one (**7**)

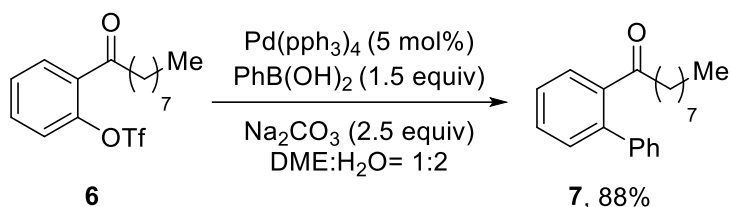

Under nitrogen, the triflate **6** (73.3 mg, 0.20 mmol, 1.0 equiv) and phenylboronic acid (36.6 mg, 0.30 mmol, 1.5 equiv) was dissolved in anhydrous 1,2-dimethoxyethane (0.25 mL) and water (0.50 mL). After addition of Na<sub>2</sub>CO<sub>3</sub> (53.0 mg, 0.50 mmol, 2.5 equiv) and Pd(PPh<sub>3</sub>)<sub>4</sub> (11.6 mg, 0.01 mmol, 5 mol%), the mixture was stirred at 100 °C (oil bath) for 12 hours. After cooling, the reaction mixture was passed through a plug of silica gel (washed with DCM) and the solvent was removed under reduced pressure. Purification by column chromatography (petroleum ether) afforded the title compound **7** as a yellow oil (52 mg, 88 % yield). <sup>1</sup>H NMR (400 MHz, CDCl<sub>3</sub>) δ= 7.44-7.36 (m, 2H), 7.35-7.28 (m, 5H), 7.27-7.17 (m, 2H), 2.14 (t, *J* = 7.5 Hz, 2H), 1.38-1.24 (m, 2H), 1.20-1.13 (m, 2H), 1.11-1.04 (m, 4H), 1.02-0.88 (m, 4H), 0.78 (t, *J* = 7.1 Hz, 3H) ppm; <sup>13</sup>C NMR (126 MHz, CDCl<sub>3</sub>) δ= 208.4, 141.3, 140.7, 140.0, 130.3, 130.1, 128.9 (2C), 128.7 (2C), 127.8, 127.6, 127.5, 43.0, 31.8, 29.1, 29.04, 28.96, 24.5, 22.6, 14.1 ppm; HRMS (ESI): calcd. for C<sub>21</sub>H<sub>26</sub>ONa [M+Na]<sup>+</sup>: 317.1876 found: 317.1876.

### Synthesis of 2-(6-Fluorohexanoyl)phenyl Trifluoromethanesulfonate (**9**)

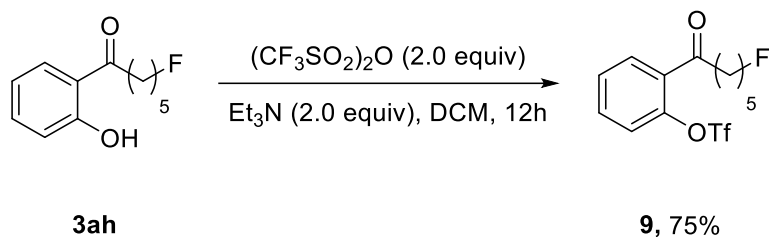

The phenol **3ah** (90.4 mg, 0.43 mmol, 1 equiv) was dissolved in DCM (0.8 mL), to which Et<sub>3</sub>N (87.0 mg, 0.86 mmol, 2.0 equiv) was added dropwise. After cooling to 0 °C, trifluoromethanesulfonic anhydride (242.6 mg, 0.86 mmol, 2.0 equiv) was added dropwise. After stirring at room temperature for 12 h, the reaction was quenched with water. The organic layer was separated and the aqueous phase was extracted with EtOAc. The combined organic phases were washed with water and saturated aqueous NaCl solution, dried over Na<sub>2</sub>SO<sub>4</sub>, filtered and concentrated under reduced pressure. The residue was purified through column chromatography on silica gel with the mixture eluent of petroleum ether and ethyl acetate (50:1) to give the title compound **9** as a yellow oil (110.4 mg, 75% yield). <sup>1</sup>H NMR (500 MHz, CDCl<sub>3</sub>) δ= 7.77 (dd, *J* = 7.7, 1.8 Hz, 1H), 7.64-7.56 (m, 1H), 7.51-7.43 (m, 1H), 7.34 (d, *J* = 8.2 Hz, 1H), 4.45 (dt, *J* = 47.3, 6.1 Hz, 2H), 2.97 (t, *J* = 7.3 Hz, 2H), 1.84-1.66 (m, 4H), 1.58-1.41 (m, 2H) ppm; <sup>13</sup>C NMR (126 MHz, CDCl<sub>3</sub>) δ= 199.2, 146.6, 133.4, 132.4, 130.2, 128.6, 122.7, 122.4 (C-F, <sup>1</sup>*J*<sub>C-F</sub> = 321.3 Hz), 119.9 (C-F, <sup>1</sup>*J*<sub>C-F</sub> = 321.3 Hz), 117.3 (C-F, <sup>1</sup>*J*<sub>C-F</sub> = 321.3 Hz), 114.8 (C-F, <sup>1</sup>*J*<sub>C-F</sub> = 321.3 Hz), 84.5 (C-F, <sup>1</sup>*J*<sub>C-F</sub> = 164.4 Hz), 83.2 (C-F, <sup>1</sup>*J*<sub>C-F</sub> = 164.4 Hz), 41.5, 30.3 (C-F, <sup>2</sup>*J*<sub>C-F</sub> = 19.4 Hz), 30.1 (C-F, <sup>2</sup>*J*<sub>C-F</sub> = 19.4 Hz), 24.8 (C-F, <sup>3</sup>*J*<sub>C-F</sub> = 5.4 Hz), 24.7 (C-F, <sup>3</sup>*J*<sub>C-F</sub> = 5.4 Hz), 23.4 ppm; <sup>19</sup>F NMR (471 MHz, CDCl<sub>3</sub>) δ= -73.40 (s, 3F), -218.53 (s, 1F) ppm; HRMS (ESI): calcd. for C<sub>13</sub>H<sub>14</sub>F<sub>4</sub>O<sub>4</sub>SNa [M+Na]<sup>+</sup>: 365.0441 found: 365.0453.



### Synthesis of (Z)-3-(5-Fluoropentylidene)isobenzofuran-1(3H)-one (**10**)<sup>15</sup>

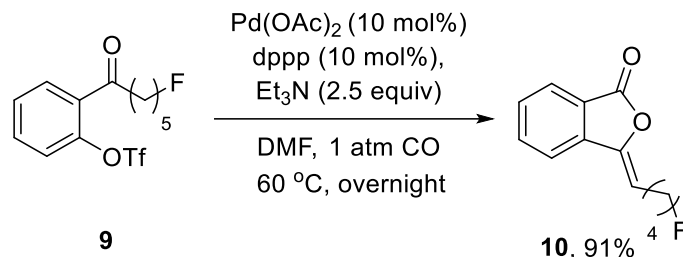

A mixture of the triflate **9** (102.7 mg, 0.3 mmol, 1.0 equiv), Et<sub>3</sub>N (60.7 mg, 0.75 mmol, 2.5 equiv), Pd(OAc)<sub>2</sub> (6.7 mg, 0.03 mmol, 10 mol%) and 1,3-bis(diphenylphosphino)propane (12.4 mg, 0.03 mmol, 10 mol%) in DMF (3.0 mL) was degassed by two freeze/pump/thaw cycles. The reaction vessel was filled with CO and stirred at 60 °C (oil bath) under a balloon of CO for 12 h. The reaction mixture was diluted with brine and extracted with Et<sub>2</sub>O. The combined organic phases were washed with brine, dried over MgSO<sub>4</sub>, filtered and evaporated under reduced pressure. Purification by flash column chromatography on silica gel (petroleum ether /ethyl acetate = 20:1) afforded the title compound **10** as a colorless oil (60.1 mg, 91 % yield). <sup>1</sup>H NMR (400 MHz, CDCl<sub>3</sub>) δ= 7.89 (dd, *J* = 7.7, 0.9 Hz, 1H), 7.72-7.62 (m, 2H), 7.55-7.49 (m, 1H), 5.64 (t, *J* = 7.8 Hz, 1H), 4.49 (dt, *J* = 47.2, 5.9 Hz, 2H), 2.53 (q, *J* = 7.5 Hz, 2H), 1.86-1.78 (m, 2H), 1.78-1.59 (m, 2H) ppm; <sup>13</sup>C NMR (101 MHz, CDCl<sub>3</sub>) δ= 167.1, 146.0, 139.4, 134.3, 129.5, 125.3, 124.4, 119.7, 108.7, 84.6 (C-F, <sup>1</sup>*J*<sub>C-F</sub> = 164.5 Hz), 82.3 (C-F, <sup>1</sup>*J*<sub>C-F</sub> = 164.5 Hz), 30.1 (C-F, <sup>2</sup>*J*<sub>C-F</sub> = 19.7 Hz), 30.0 (C-F, <sup>2</sup>*J*<sub>C-F</sub> = 19.7 Hz), 25.3, 25.0 (C-F, <sup>3</sup>*J*<sub>C-F</sub> = 4.9 Hz), 24.9 (C-F, <sup>3</sup>*J*<sub>C-F</sub> = 4.9 Hz) ppm; <sup>19</sup>F NMR (471 MHz, CDCl<sub>3</sub>) δ= -218.31- -219.04 (m, 1F); HRMS (ESI): calcd. for C<sub>13</sub>H<sub>13</sub>FO<sub>2</sub>Na [M+Na]<sup>+</sup>: 243.0792 found: 243.0798.

### Synthesis of Phenyl 4-Methoxy-3-nonanoylbenzoate (**14**)

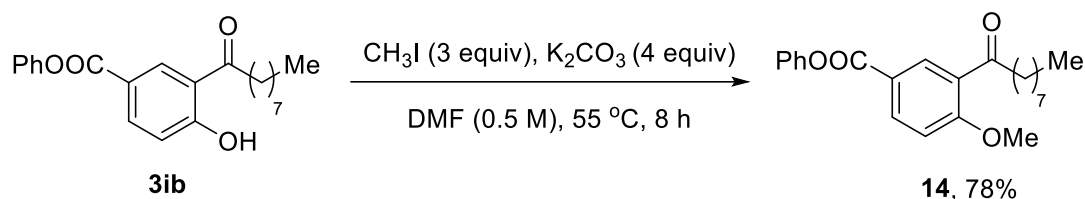

The phenol **3ib** (101.6 mg, 0.3 mmol, 1 equiv), K<sub>2</sub>CO<sub>3</sub> (165.9 mg, 1.2 mmol, 4 equiv) was dissolved in DMF (0.6 mL), to which CH<sub>3</sub>I (127.7 mg, 0.9 mmol, 3.0 equiv) was added. After stirring at 55 °C (oil bath) for 8 h, the reaction was quenched with water. The mixture was extracted with EtOAc and the combined organic phases were washed with water, brine, dried over Na<sub>2</sub>SO<sub>4</sub>, filtered and concentrated under reduced pressure. The residue was purified through column chromatography on silica gel with the mixture eluent of petroleum ether and ethyl acetate (10:1) to give the title compound **14** as a colorless oil (86 mg, 78 % yield). <sup>1</sup>H NMR (500 MHz, CDCl<sub>3</sub>) δ= 8.46 (d, *J* = 2.3 Hz, 1H), 8.27 (dd, *J* = 8.7, 2.3 Hz, 1H), 7.42 (t, *J* = 7.9 Hz, 2H), 7.27 (d, *J* = 8.2 Hz, 1H), 7.20 (d, *J* = 7.5 Hz, 2H), 7.06 (d, *J* = 8.7 Hz, 1H), 3.99 (s, 3H), 2.97 (t, *J* = 7.4 Hz, 2H), 1.76-1.65 (m, 2H), 1.37-1.25 (m, 10H), 0.88 (t, *J* = 6.7 Hz, 3H) ppm; <sup>13</sup>C NMR (126 MHz, CDCl<sub>3</sub>) δ= 202.4, 164.4, 162.0, 150.9, 135.2, 132.5, 129.5 (2C), 129.1, 125.9, 122.1, 121.7 (2C), 111.5, 56.0, 43.7, 31.9, 29.5, 29.4, 29.2, 24.3, 22.7, 14.1 ppm; HRMS (ESI): calcd. for C<sub>23</sub>H<sub>29</sub>O<sub>4</sub> [M+H]<sup>+</sup>: 369.2060 found: 369.2072.

## Synthesis of 4-Methoxy-3-nonanoyl-N-phenylbenzamide (**11**)<sup>16</sup>

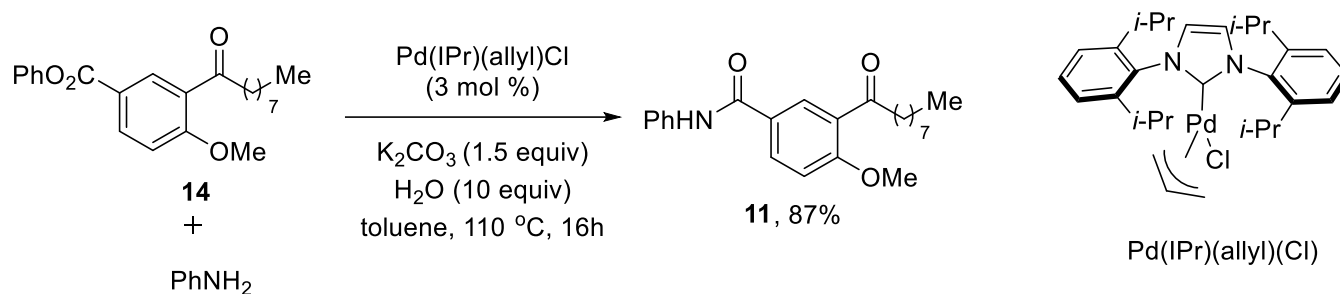

An oven dried screw-capped vial was charged with a magnetic stir bar, powdered  $\text{K}_2\text{CO}_3$  (41.5 mg, 0.3 mmol 1.5 equiv),  $\text{Pd}(\text{IPr})(\text{allyl})\text{Cl}$  (3.44 mg, 0.06 mmol, 3 mol%), the phenolic ester **14** (74.0 mg, 0.2 mmol, 1 equiv) and aniline (23.0 mg, 0.24 mmol, 1.2 equiv). The vial and contents were placed under vacuum and back-filled with  $\text{N}_2$  under a Schleck line three times. Dry toluene (1 mL, 0.2 M) and degassed water (36.0 mg, 2.0 mmol, 10 equiv) were then added successively under nitrogen. The vial was sealed and stirred vigorously at 110 °C (oil bath) for 16 h. After cooling to room temperature, the reaction mixture was diluted with ethyl acetate and filtered through a plug of silica gel (10 mL of EtOAc eluent). The crude mixture was concentrated in vacuo and was purified through column chromatography on silica gel (petroleum ether: EtOAc = 5:1) to give the title compound **11** as a white solid (87 mg, 87 % yield).  $^1\text{H}$  NMR (400 MHz,  $\text{CDCl}_3$ )  $\delta$  = 8.20 (s, 1H), 8.16-8.06 (m, 2H), 7.65 (d,  $J$  = 8.0 Hz, 2H), 7.35 (t,  $J$  = 7.8 Hz, 2H), 7.13 (t,  $J$  = 7.4 Hz, 1H), 7.03 (d,  $J$  = 8.6 Hz, 1H), 3.95 (s, 3H), 2.96 (t,  $J$  = 7.4 Hz, 2H), 1.74-1.55 (m, 2H), 1.35-1.16 (m, 10H), 0.88 (t,  $J$  = 7.0 Hz, 3H) ppm;  $^{13}\text{C}$  NMR (126 MHz,  $\text{CDCl}_3$ )  $\delta$  = 202.6, 164.5, 161.0, 138.0, 133.5, 129.1 (2C), 128.4, 128.0, 127.2, 124.5, 120.3 (2 C), 112.0, 55.9, 43.9, 31.9, 29.5, 29.4, 29.2, 24.3, 22.7, 14.1 ppm; HRMS (ESI): calcd. for  $\text{C}_{23}\text{H}_{30}\text{NO}_3$   $[\text{M}+\text{H}]^+$ : 368.2220 found: 368.2217.

## 5 mmol-Scale Reaction of Ni-Catalyzed Cross-Coupling of Phenyl Salicylic Acid Ester with *n*-Octyl Bromide

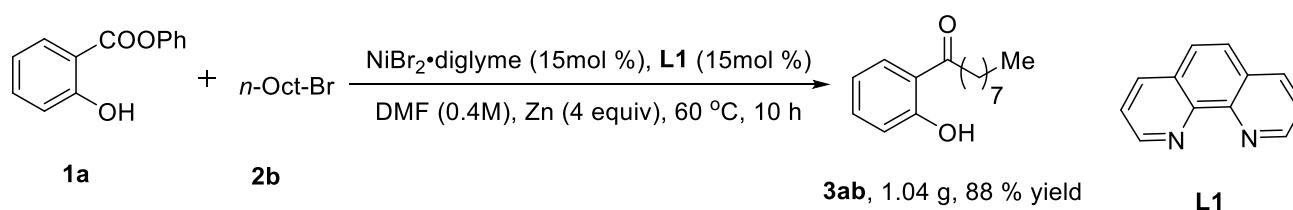

A vial charged with the **1a** (1.1 g, 5.0 mmol, 1 equiv), ligand **L1** (135.0 mg, 0.75 mmol, 15 mol%) and a stir bar was evacuated and filled with nitrogen (three cycles). In a nitrogen-filled glovebox,  $\text{NiBr}_2 \cdot \text{diglyme}$  (265.0 mg, 0.75 mmol, 15 mol%) and Zn-powder (1.3 g, 20.0 mmol, 4.0 equiv) were added to the mixture. The reaction tube was then sealed and removed from the glove box. Subsequently, DMF (10 mL) was added to the mixture under nitrogen atmosphere. Then the reaction mixture was heated to 60 °C with a heating block, before alkyl bromides **2b** (1.45 g, 7.5 mmol, 1.5 equiv) were added. After stirring at this temperature for 10 h, the mixture was then filtered through a pad of Celite and concentrated under reduced pressure. The residue was purified through column chromatography on silica gel (petroleum ether/ethyl acetate = 10:1) to afford **3ab** (1.04 g, 88 % yield).

## Control Experiments

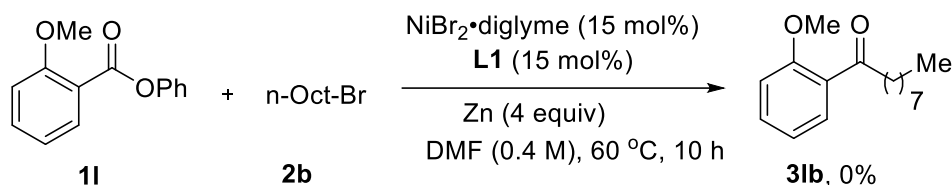

A sealed reaction tube charged with the phenolic esters **1l** (45.7 mg, 0.2 mmol, 1 equiv), ligand **L1** (5.4 mg, 0.03 mmol, 15 mol%) and a stir bar was evacuated and filled with nitrogen (three cycles). In a nitrogen-filled glovebox,  $\text{NiBr}_2 \cdot \text{diglyme}$  (10.6 mg, 0.03 mmol, 15 mol%) and Zn-powder (52 mg, 0.8 mmol, 4.0 equiv) were added to the mixture. The reaction tube was then sealed and removed from the glove box. Subsequently, DMF (0.5 mL) was added to the mixture under nitrogen atmosphere. Then the reaction mixture was heated to 60 °C with a heating block, before 1-bromooctane **2b** (57.9 mg, 0.3 mmol, 1.5 equiv) was added. After stirring at this temperature for 10 h, the mixture was then filtered through a pad of Celite and concentrated under reduced pressure. The residue was subjected to TLC and NMR analysis, indicating that the desired coupling product **3lb** was not formed.

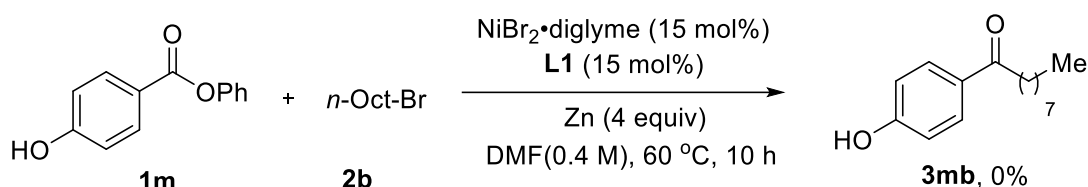

A sealed reaction tube charged with the phenolic esters **1m** (45.7 mg, 0.2 mmol, 1 equiv), ligand **L1** (5.4 mg, 0.03 mmol, 15 mol%) and a stir bar was evacuated and filled with nitrogen (three cycles). In a nitrogen-filled glovebox,  $\text{NiBr}_2 \cdot \text{diglyme}$  (10.6 mg, 0.03 mmol, 15 mol%) and Zn-powder (52 mg, 0.8 mmol, 4.0 equiv) were added to the mixture. The reaction tube was then sealed and removed from the glove box. Subsequently, DMF (0.5 mL) was added to the mixture under nitrogen atmosphere. Then the reaction mixture was heated with a heating block, before 1-bromooctane **2b** (57.9 mg, 0.3 mmol, 1.5 equiv) was added. After stirring at this temperature for 10 h, the mixture was then filtered through a pad of Celite and concentrated under reduced pressure. The residue was subjected to TLC and NMR analysis, indicating that the desired coupling product **3mb** was not formed.

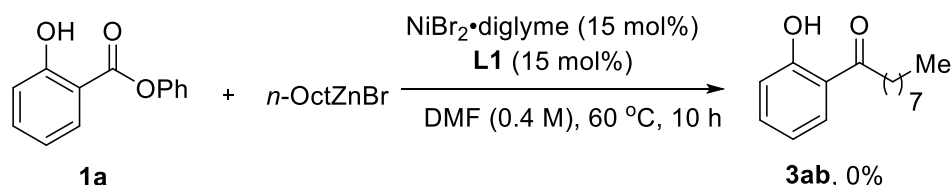

A sealed reaction tube charged with the phenolic esters **1a** (42.8 mg, 0.2 mmol, 1 equiv), ligand **L1** (5.4 mg, 0.03 mmol, 15 mol%) and a stir bar was evacuated and filled with nitrogen (three cycles). In a nitrogen-filled glovebox,  $\text{NiBr}_2 \cdot \text{diglyme}$  (10.6 mg, 0.03 mmol, 15 mol%) was added to the mixture. The reaction tube was then sealed and removed from the glove box. Subsequently, DMF (0.5 mL) was added to the mixture under nitrogen atmosphere. Then the reaction mixture was heated to 60 °C with a heating block, before  $n\text{-OctZnBr}^{17}$  (0.72 mL, 0.83 M in THF, 3 equiv) was added. After stirring at this temperature for 10 h, the mixture was then filtered through a pad of Celite and concentrated under reduced pressure. The residue was subjected to TLC and NMR analysis, indicating that the desired coupling product **3ab** was not formed.

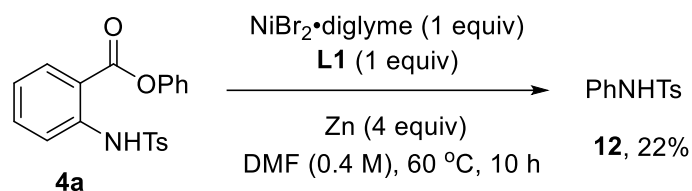

A sealed reaction tube charged with the phenolic esters **4a** (73.5 mg, 0.2 mmol, 1 equiv), ligand **L1** (36.0 mg, 0.2 mmol, 1 equiv) and a stir bar was evacuated and filled with nitrogen (three cycles). In a nitrogen-filled glovebox,  $\text{NiBr}_2\cdot\text{diglyme}$  (71.0 mg, 0.2 mmol, 1 equiv) and Zn-powder (52 mg, 0.8 mmol, 4.0 equiv) were added to the mixture. The reaction tube was then sealed and removed from the glove box. Subsequently, DMF (0.5 mL) was added to the mixture under nitrogen atmosphere. After stirring at 60 °C with a heating block for 10 h, the mixture was then filtered through a pad of Celite and concentrated under reduced pressure. The residue was purified through column chromatography on silica gel (petroleum ether/ethyl acetate = 10:1) to afford PhNHTs (**12**) as a colorless oil (11 mg, 22 % yield).  $^1\text{H}$  NMR (400 MHz,  $\text{CDCl}_3$ )  $\delta$  = 7.66 (d,  $J$  = 8.2 Hz, 2H), 7.24-7.17 (m, 4H), 7.15-7.03 (m, 3H), 6.82 (s, 1H), 2.37 (s, 3H) ppm;  $^{13}\text{C}$  NMR (101 MHz,  $\text{CDCl}_3$ )  $\delta$  = 143.9, 136.5, 136.1, 129.6 (2C), 129.3 (2C), 127.3 (2C), 125.3, 121.6 (2C), 21.5 ppm. HRMS (ESI): calcd. for  $\text{C}_{13}\text{H}_{13}\text{NO}_2\text{SNa}[\text{M}+\text{Na}]^+$ : 270.0559 found: 270.0566.

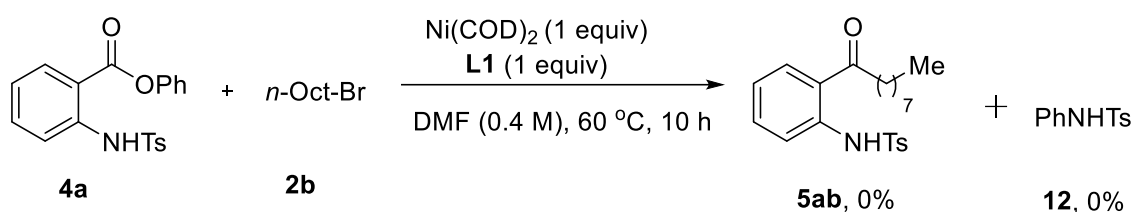

A sealed reaction tube charged with the phenolic esters **4a** (73.5 mg, 0.2 mmol, 1 equiv), ligand **L1** (36.0 mg, 0.2 mmol, 1 equiv) and a stir bar was evacuated and filled with nitrogen (three cycles). In a nitrogen-filled glovebox,  $\text{Ni(COD)}_2$  (55.0 mg, 0.2 mmol, 1 equiv) was added to the mixture. The reaction tube was then sealed and removed from the glove box. Subsequently, DMF (0.5 mL) and 1-bromooctane **2b** (57.9 mg, 0.3 mmol, 1.5 equiv) were added to the mixture under nitrogen atmosphere. After stirring at 60 °C with a heating block for 10 h, the mixture was then filtered through a pad of Celite and concentrated under reduced pressure. The residue was subjected to TLC and NMR analysis, indicating that neither of the desired coupling product **5ab** and PhNHTs was formed.

## Radical Clock Experiment

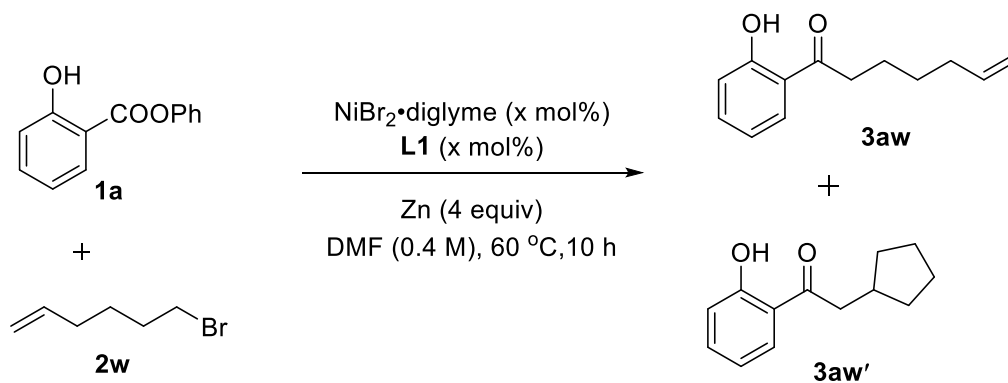

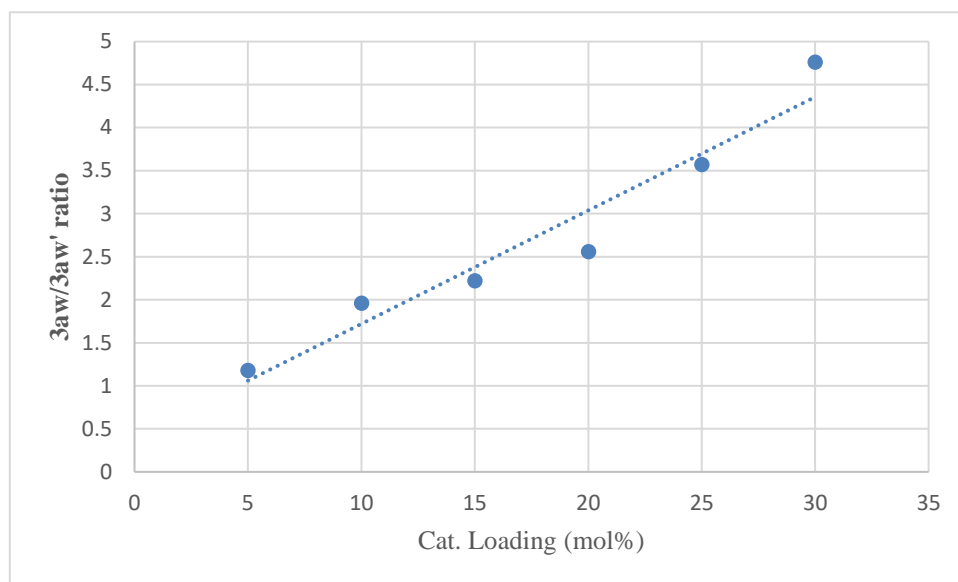

A sealed reaction tube charged with the phenolic esters **1a** (42.8 mg, 0.2 mmol, 1 equiv), ligand **L1** (1.8 mg, 0.015 mmol, 5 mol%) and a stir bar was evacuated and filled with nitrogen (three cycles). In a nitrogen-filled glovebox, NiBr<sub>2</sub>•diglyme (3.5 mg, 0.015 mmol, 5 mol%) and Zn-powder (52 mg, 0.8 mmol, 4.0 equiv) were added to the mixture. The reaction tube was then sealed and removed from the glove box. Subsequently, DMF (0.5 mL) was added to the mixture under nitrogen atmosphere. Then the reaction mixture was heated to 60 °C with a heating block, before 1-bromooctane **2w** (48.6 mg, 0.3 mmol, 1.5 equiv) was added. After stirring at this temperature for 10 h, the mixture was then filtered through a pad of Celite and concentrated under reduced pressure. The residue was purified through column chromatography on silica gel (petroleum ether) to afford the corresponding products **3aw:3aw'**= **1:0.85**.

A sealed reaction tube charged with the phenolic esters **1a** (42.8 mg, 0.2 mmol, 1 equiv), ligand **L1** (3.6 mg, 0.02 mmol, 10 mol%) and a stir bar was evacuated and filled with nitrogen (three cycles). In a nitrogen-filled glovebox, NiBr<sub>2</sub>•diglyme (7.0 mg, 0.02 mmol, 10 mol%) and Zn-powder (52 mg, 0.8 mmol, 4.0 equiv) were added to the mixture. The reaction tube was then sealed and removed from the glove box. Subsequently, DMF (0.5 mL) was added to the mixture under nitrogen atmosphere. Then the reaction mixture was heated to 60 °C with a heating block, before 1-bromooctane **2w** (48.6 mg, 0.3 mmol, 1.5 equiv) was added. After stirring at this temperature for 10 h, the mixture was then filtered through a pad of Celite and concentrated under reduced pressure. The residue was purified through column chromatography on silica gel (petroleum ether) to afford the corresponding products **3aw:3aw'**= **1:0.51**.

A sealed reaction tube charged with the phenolic esters **1a** (42.8 mg, 0.2 mmol, 1 equiv), ligand **L1** (5.4mg, 0.03 mmol, 15 mol%) and a stir bar was evacuated and filled with nitrogen (three cycles). In a nitrogen-filled glovebox, NiBr<sub>2</sub>•diglyme (10.6 mg, 0.015 mmol, 15 mol%) and Zn-powder (52 mg, 0.8 mmol, 4.0 equiv) were added to the mixture. The reaction tube was then sealed and removed from the glove box. Subsequently, DMF (0.5 mL) was added to the mixture under nitrogen atmosphere. Then the reaction mixture was heated to 60 °C with a heating block, before 1-bromooctane **2w** (48.6 mg, 0.3 mmol, 1.5 equiv) was added. After stirring at this temperature for 10 h, the mixture was then filtered through a pad of Celite and concentrated under reduced pressure. The residue was purified through column chromatography on silica gel (petroleum ether) to afford the corresponding products **3aw:3aw'**= **1:0.45**.

A sealed reaction tube charged with the phenolic esters **1a** (42.8 mg, 0.2 mmol, 1 equiv), ligand **L1** (7.2 mg, 0.04 mmol, 20 mol%) and a stir bar was evacuated and filled with nitrogen (three cycles). In a nitrogen-filled glovebox, NiBr<sub>2</sub>•diglyme (14.0 mg, 0.04 mmol, 20 mol%) and Zn-powder (52 mg, 0.8 mmol, 4.0 equiv) were added to the mixture. The reaction tube was then sealed and removed from the glove box. Subsequently, DMF (0.5 mL) was added to the mixture under nitrogen

atmosphere. Then the reaction mixture was heated to 60 °C with a heating block, before 1-bromooctane **2w** (48.6 mg, 0.3 mmol, 1.5 equiv) was added. After stirring at this temperature for 10 h, the mixture was then filtered through a pad of Celite and concentrated under reduced pressure. The residue was purified through column chromatography on silica gel (petroleum ether) to afford the corresponding products **3aw:3aw'**= **1:0.39**.

A sealed reaction tube charged with the phenolic esters **1a** (42.8 mg, 0.2 mmol, 1 equiv), ligand **L1** (9.0 mg, 0.05 mmol, 25 mol%) and a stir bar was evacuated and filled with nitrogen (three cycles). In a nitrogen-filled glovebox, NiBr<sub>2</sub>•diglyme (17.5 mg, 0.015 mmol, 25 mol%) and Zn-powder (52 mg, 0.8 mmol, 4.0 equiv) were added to the mixture. The reaction tube was then sealed and removed from the glove box. Subsequently, DMF (0.5 mL) was added to the mixture under nitrogen atmosphere. Then the reaction mixture was heated to 60 °C with a heating block, before 1-bromooctane **2w** (48.6 mg, 0.3 mmol, 1.5 equiv) was added. After stirring at this temperature for 10 h, the mixture was then filtered through a pad of Celite and concentrated under reduced pressure. The residue was purified through column chromatography on silica gel (petroleum ether) to afford the corresponding products **3aw:3aw'**= **1:0.28**.

A sealed reaction tube charged with the phenolic esters **1a** (42.8 mg, 0.2 mmol, 1 equiv), ligand **L1** (10.8 mg, 0.06 mmol, 30 mol%) and a stir bar was evacuated and filled with nitrogen (three cycles). In a nitrogen-filled glovebox, NiBr<sub>2</sub>•diglyme (121.0 mg, 0.06 mmol, 30 mol%) and Zn-powder (52 mg, 0.8 mmol, 4.0 equiv) were added to the mixture. The reaction tube was then sealed and removed from the glove box. Subsequently, DMF (0.5 mL) was added to the mixture under nitrogen atmosphere. Then the reaction mixture was heated to 60 °C with a heating block, before 1-bromooctane **2w** (48.6 mg, 0.3 mmol, 1.5 equiv) was added. After stirring at this temperature for 10 h, the mixture was then filtered through a pad of Celite and concentrated under reduced pressure. The residue was purified through column chromatography on silica gel (petroleum ether) to afford the corresponding products **3aw:3aw'**= **1:0.21**.

Compound **3aw**: <sup>1</sup>H NMR (400 MHz, CDCl<sub>3</sub>) δ= 12.38 (s, 1 H), 7.76 (dd, *J* = 8.1, 1.8 Hz, 1H), 7.51-7.39 (m, 1H), 6.98 (dd, *J* = 8.3, 1.2 Hz, 1H), 6.92-6.85 (m, 1H), 5.89-5.74 (m, 1H), 5.09-4.85 (m, 2H), 3.05-2.91 (m, 2 H), 2.23-2.02 (m, 2H), 1.83-1.69 (m, 2H), 1.55-1.44 (m, 2H) ppm.

Compound **3aw'**: <sup>1</sup>H NMR (400 MHz, CDCl<sub>3</sub>) δ= 12.40 (s, 1H), 7.76 (dd, *J* = 8.1, 1.8 Hz, 1H), 7.51-7.39 (m, 1H), 6.98 (dd, *J* = 8.3, 1.2 Hz, 1H), 6.92-6.85 (m, 1H), 3.05-2.91 (m, 2H), 2.23-2.02 (m, 1H), 1.83-1.54 (m, 8H) ppm.

## References

1. N. A. Serratore, C. B. Anderson, G. B. Frost, T. G. Hoang, S. J. Underwood, P. M. Gemmel, M. A. Hardy, C. J. Douglas, *J. Am. Chem. Soc.* **2018**, *140*, 10025–10033
2. D. Alpers, K. P. Cole, C. R. J. Stephenson, *Angew. Chem. Int. Ed.* **2018**, *57*, 12167–12170.
3. M. Shang, S.-Z. Sun, H.-X. Dai, J.-Q. Yu, *J. Am. Chem. Soc.* **2014**, *136*, 3354–3357.
4. D. Gartner, A. L. Stein, S. Grupe, J. Arp, A. J. von Wangelin, *Angew. Chem. Int. Ed.* **2015**, *54*, 10545-10549.
5. F. Brunel, C. Lautard, F. Garzino, S. Giorgio, J. M. Raimundo, J. M. Bolla, M. Camplo, *Bioorg. Med. Chem. Lett.* **2016**, *2*, 3770–3773.
6. Y. Liu, L. Ji, M. Eno, S. Kudalkar, A.-L. Li, M. Schimpfen, O. Benchama, P. Morales, S. Xu, D. Hurst, S. Wu, K. A. Mohammad, J. T. Wood, N. Zvonok, D. P. Papahatjis, H. Zhou, C. Honrao, K. Mackie, P. Reggio, A. G. Hohmann, L. J. Marnett, A. Makriyannis, S. P. Nikas, *J. Med. Chem.* **2018**, *61*, 8639–8657.
7. D. Ding, H. Dong, C. Wang, *iScience* **2020**, *23*, 101017.
8. Z. Lin, Y. Lan, C. Wang, *Org. Lett.* **2019**, *21*, 8316–8322.
9. T. C. Atack, S. P. Cook, *J. Am. Chem. Soc.* **2016**, *138*, 6139–6142.
10. M. Von Delius, C. M. Le, V. M. Dong, *J. Am. Chem. Soc.* **2012**, *134*, 15022–15032.
11. A. D. Alorati, A. D. Gibb, P. R. Mullens, Gavin. W. Stewart, *Org. Proc. Res. Dev.* **2012**, *16*, 1947–1952.

12. M. Vimal, U. Pathak, A. K. Halve, *Synth. Commun.* **2019**, *49*, 2805–2814.
13. R. Perrone, F. Berardi, N. A. Colabufo, E. Lacivita, M. Leopoldo, V. Tortorella, *J. Med. Chem.* **2003**, *46*, 646–649.
14. L. Hu, Y. Zhang, Q.-W. Zhang, Q. Yin, X. Zhang, *Angew. Chem. Int. Ed.* **2020**, *59*, 5321–5325.
15. P. G. Cittani, G. Mastropietro, E. Morera, G. Ortar, *Tetrahedron Lett.* **1993**, *34*, 3763–3766.
16. T. B. Halima, J. K. Vandavasi, M. Shkoor, S. G. Newman, *ACS Catal.* **2017**, *7*, 2176–2180.
17. J. Pan, M. Zhang, S. Zhang, *Org. Biomol. Chem.* **2012**, *10*, 1060–1067.

## NMR-Spectra

$^1\text{H}$  NMR-spectrum (500 MHz,  $\text{CDCl}_3$ ) of **1i**

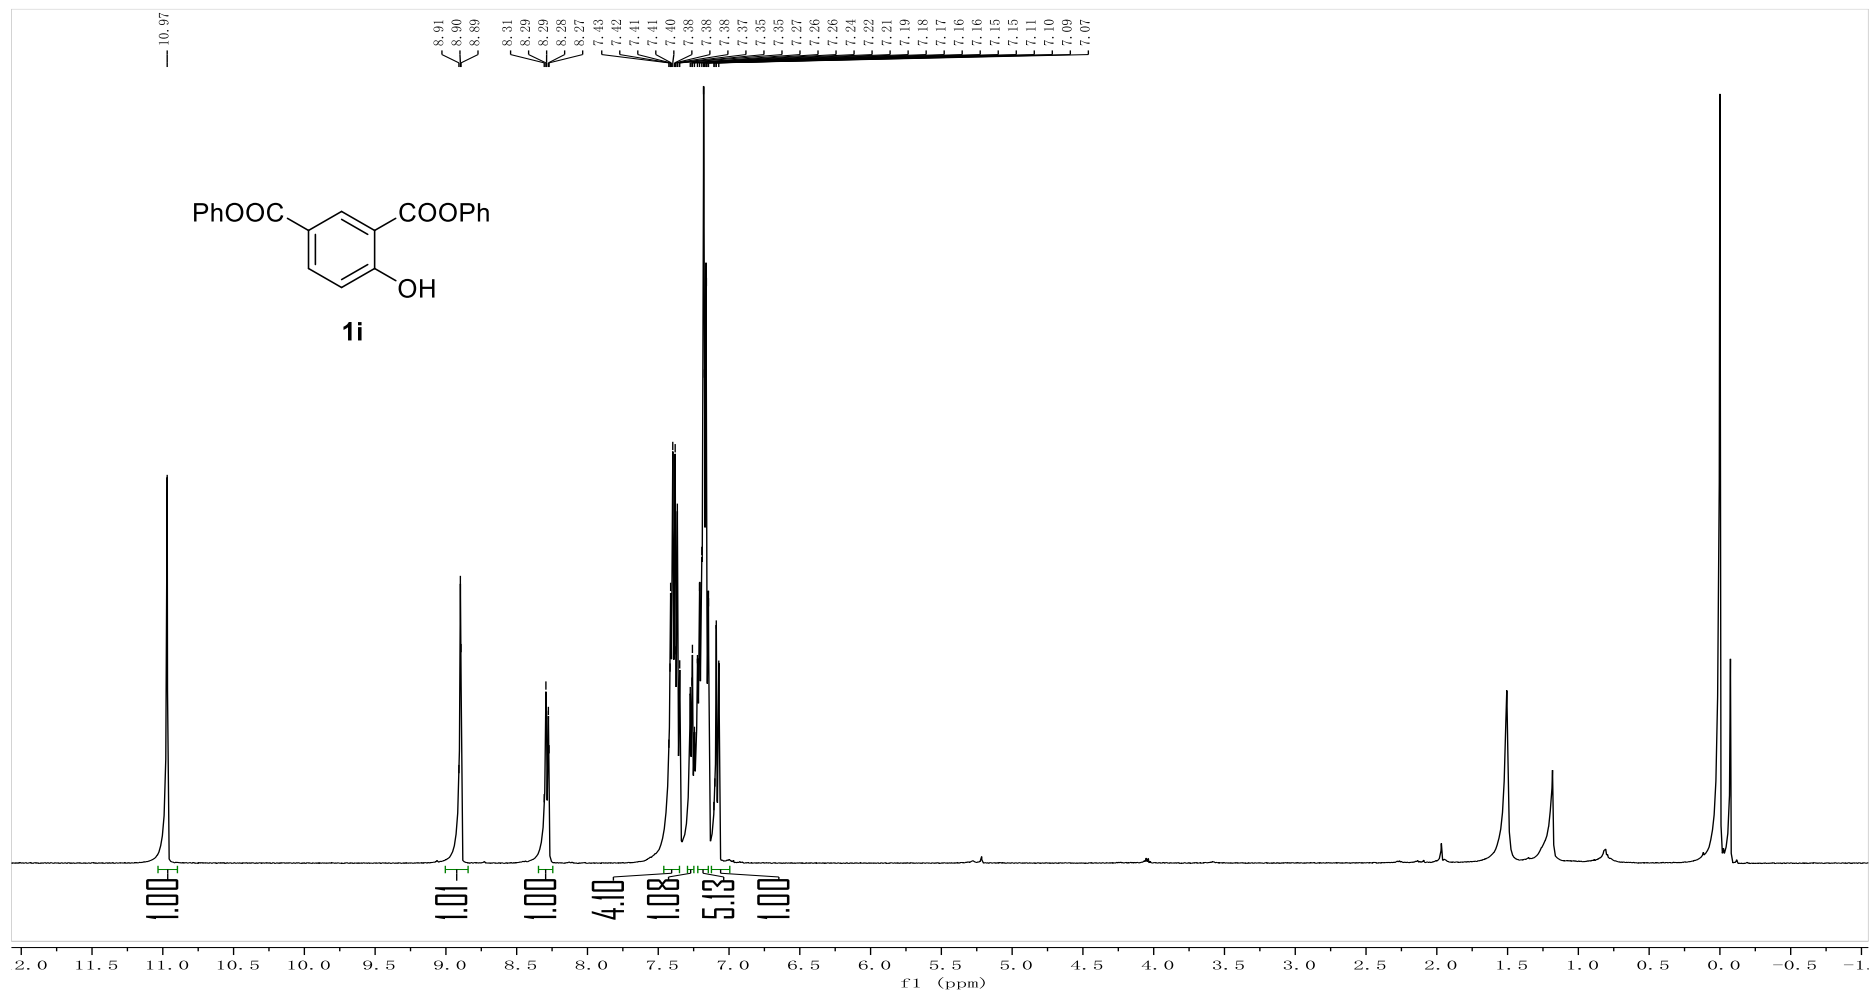



$^{13}\text{C}$  NMR-spectrum (126 MHz,  $\text{CDCl}_3$ ) of **1i**

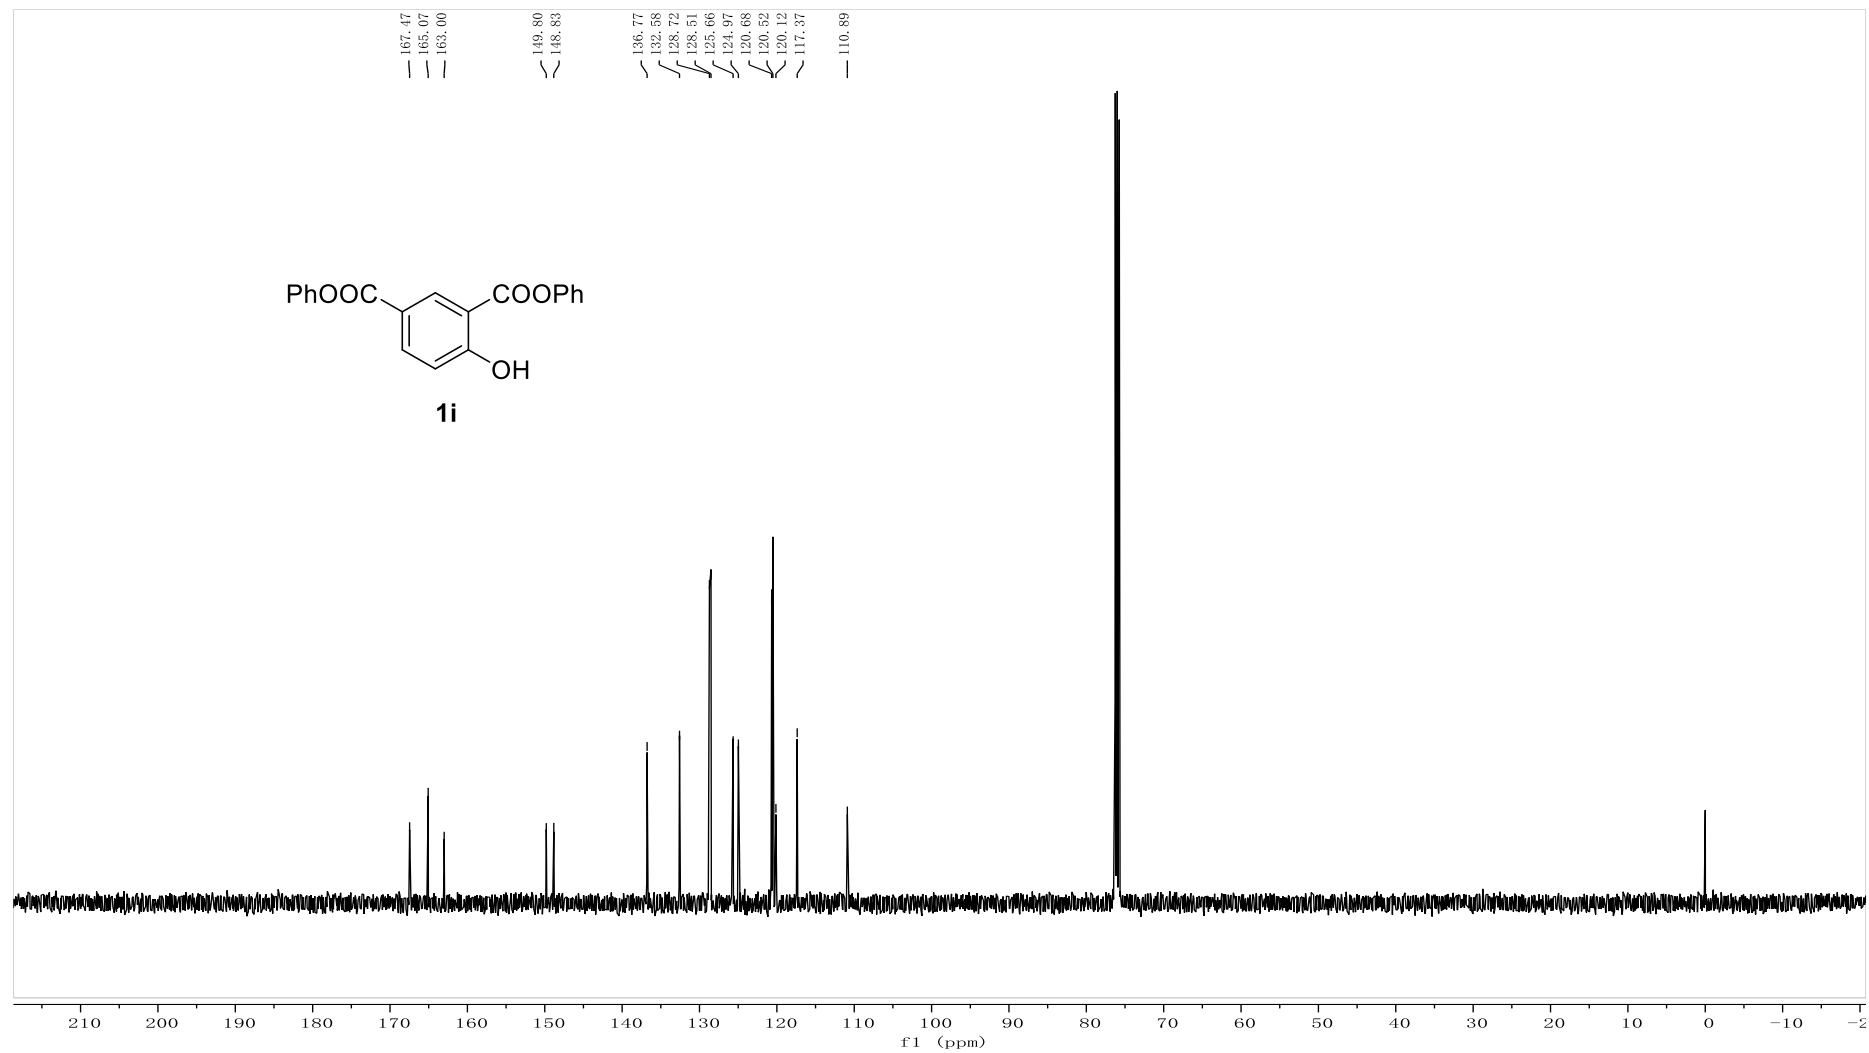

<sup>1</sup>H NMR-spectrum (400 MHz, CDCl<sub>3</sub>) of **1j**

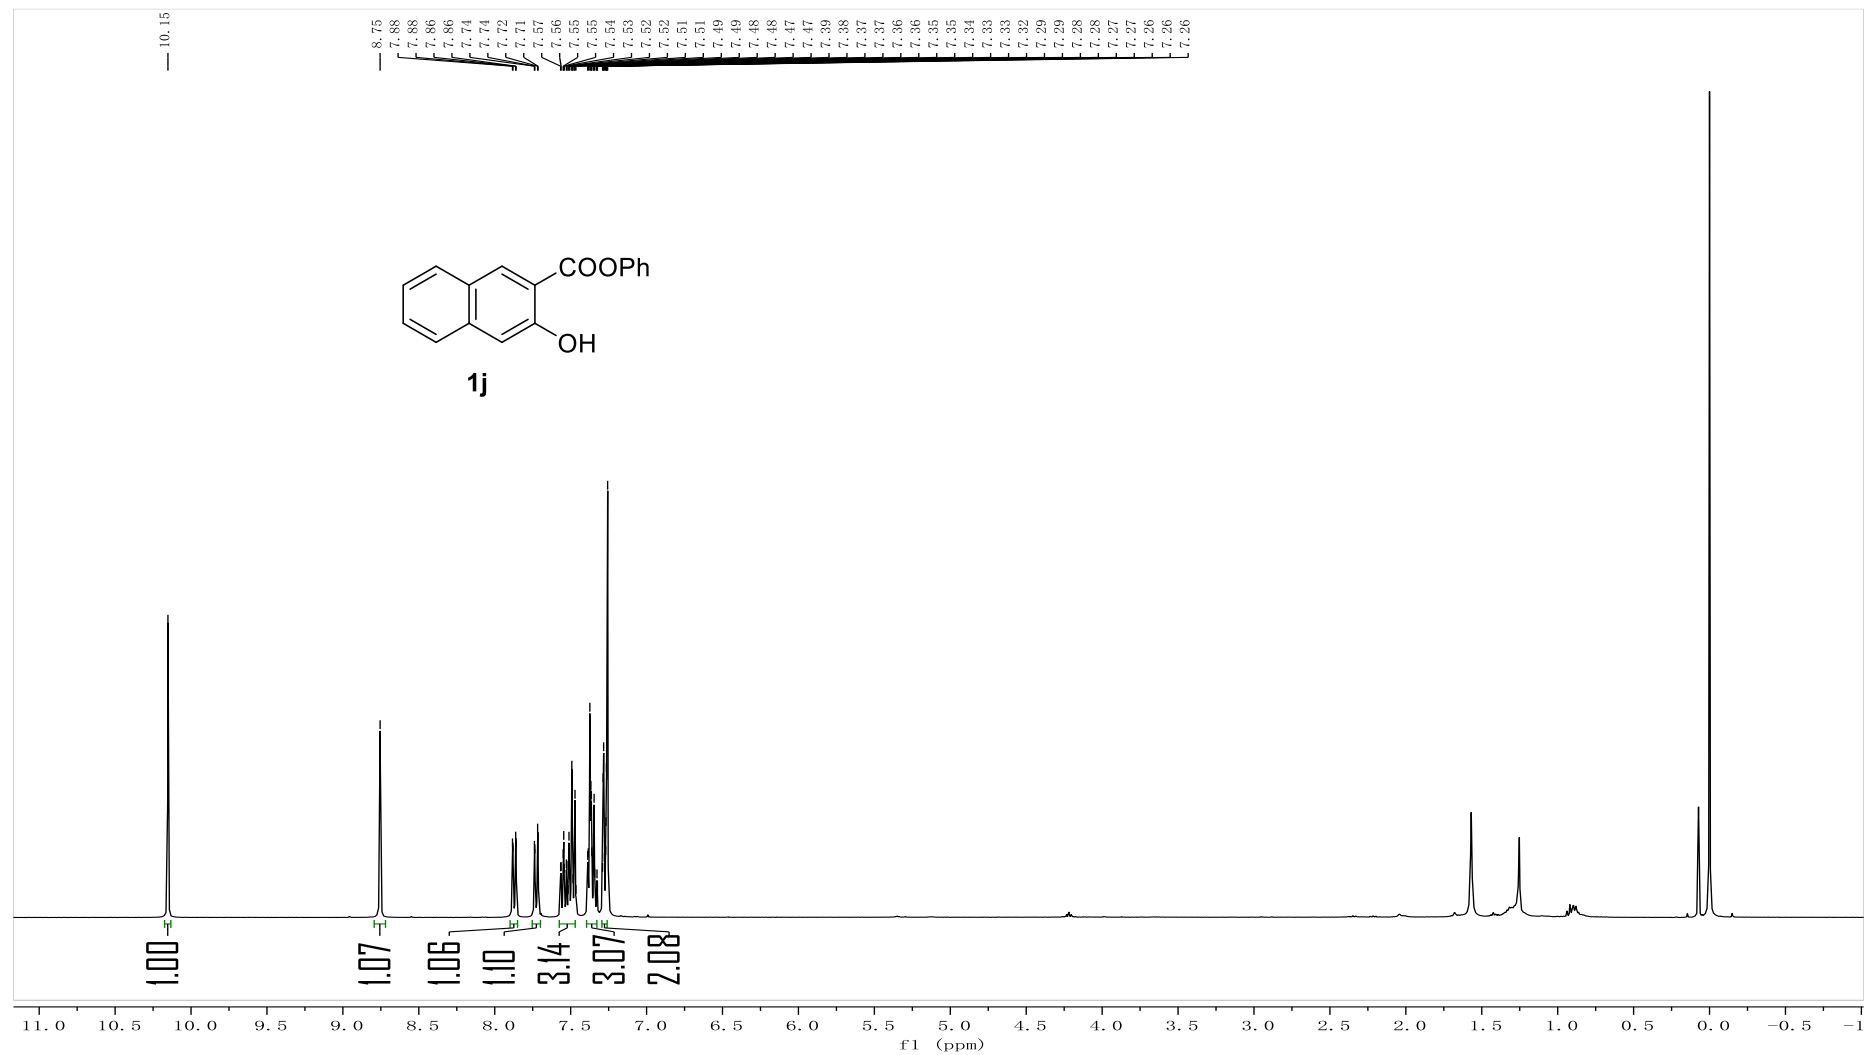

$^{13}\text{C}$  NMR-spectrum (101 MHz,  $\text{CDCl}_3$ ) of **1j**

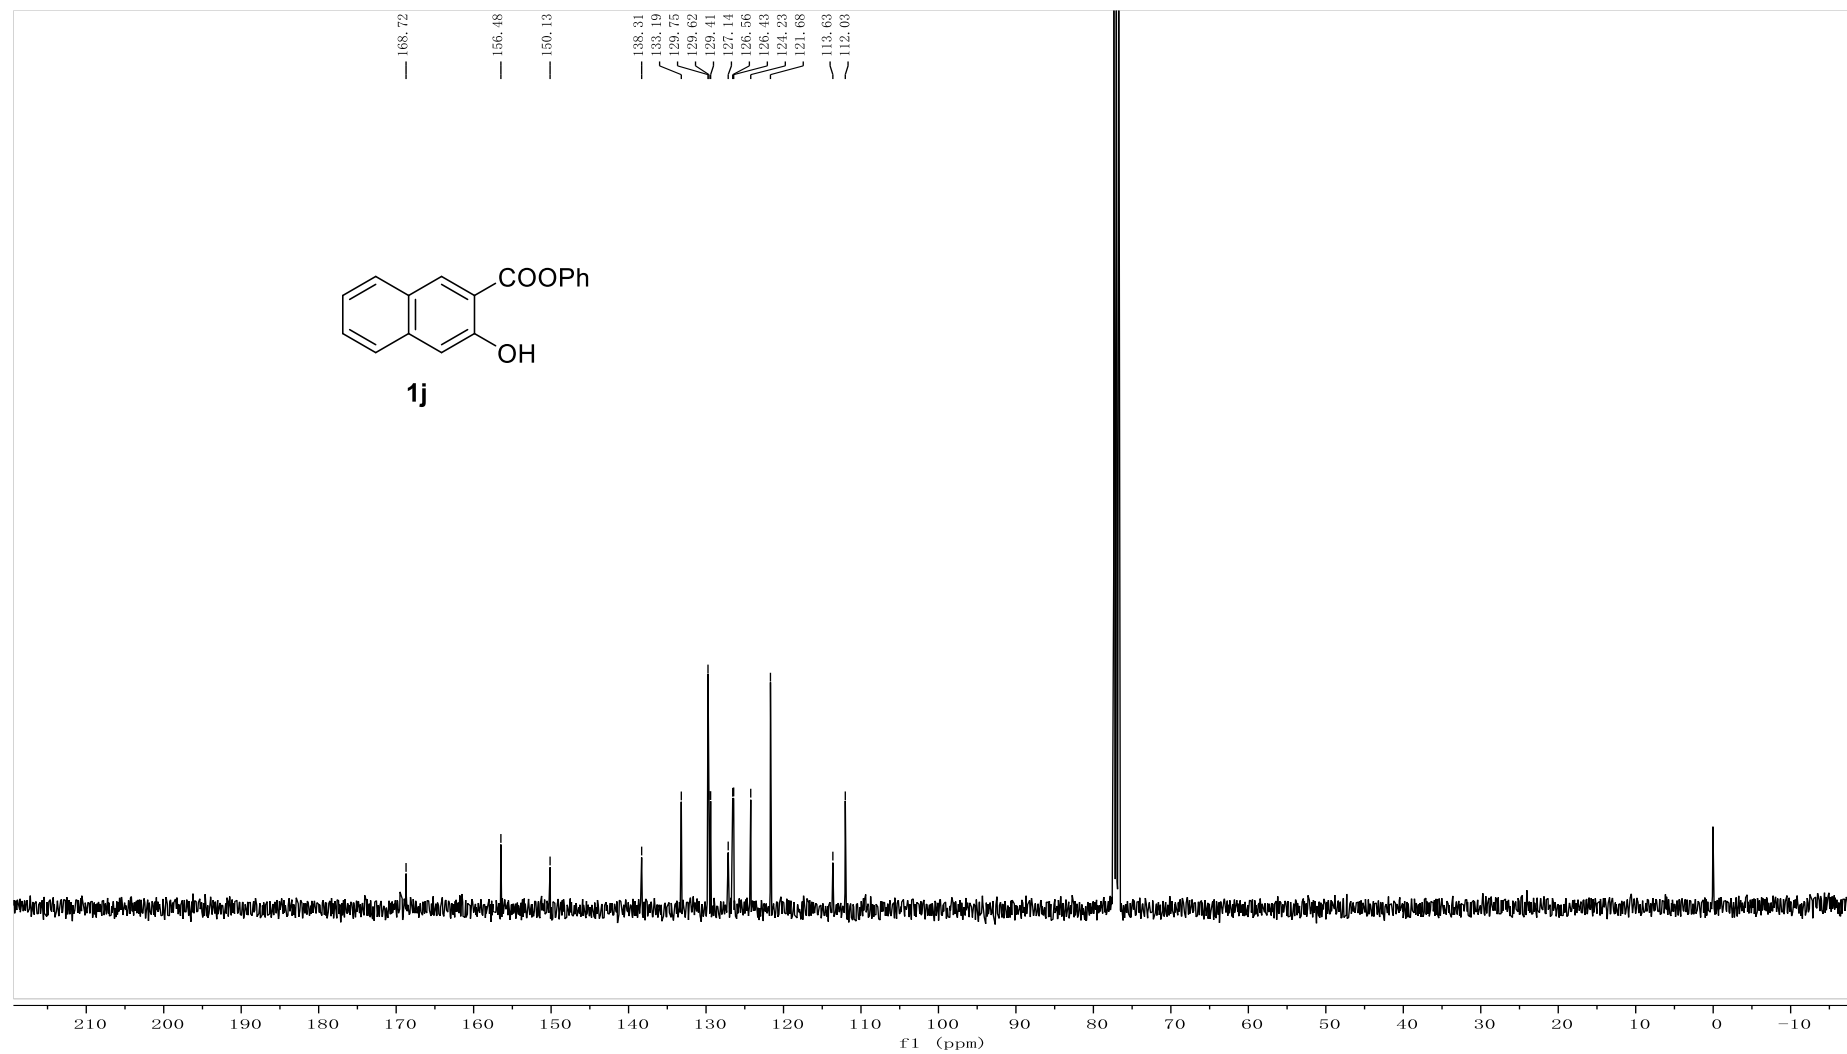

<sup>1</sup>H NMR-spectrum (400 MHz, DMSO-*d*<sub>6</sub>) of **S-1**

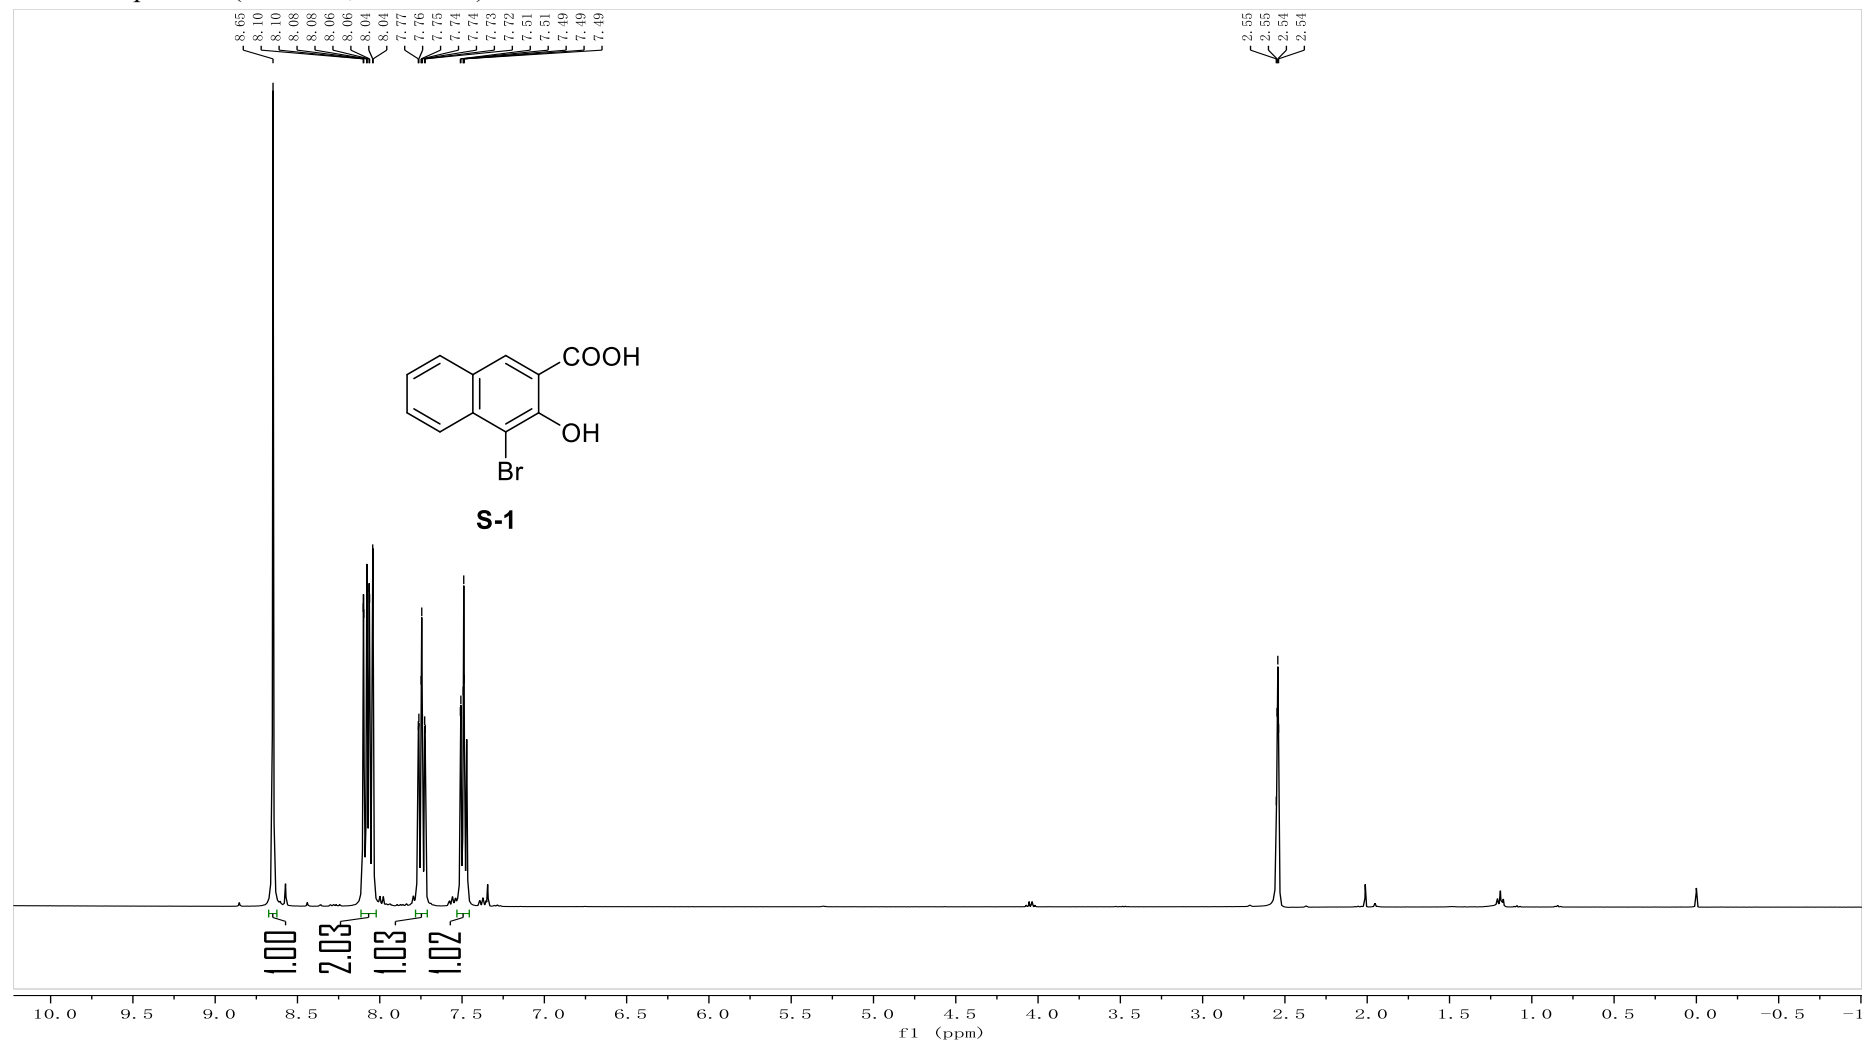

$^{13}\text{C}$  NMR-spectrum (101 MHz,  $\text{DMSO-}d_6$ ) of **S-1**

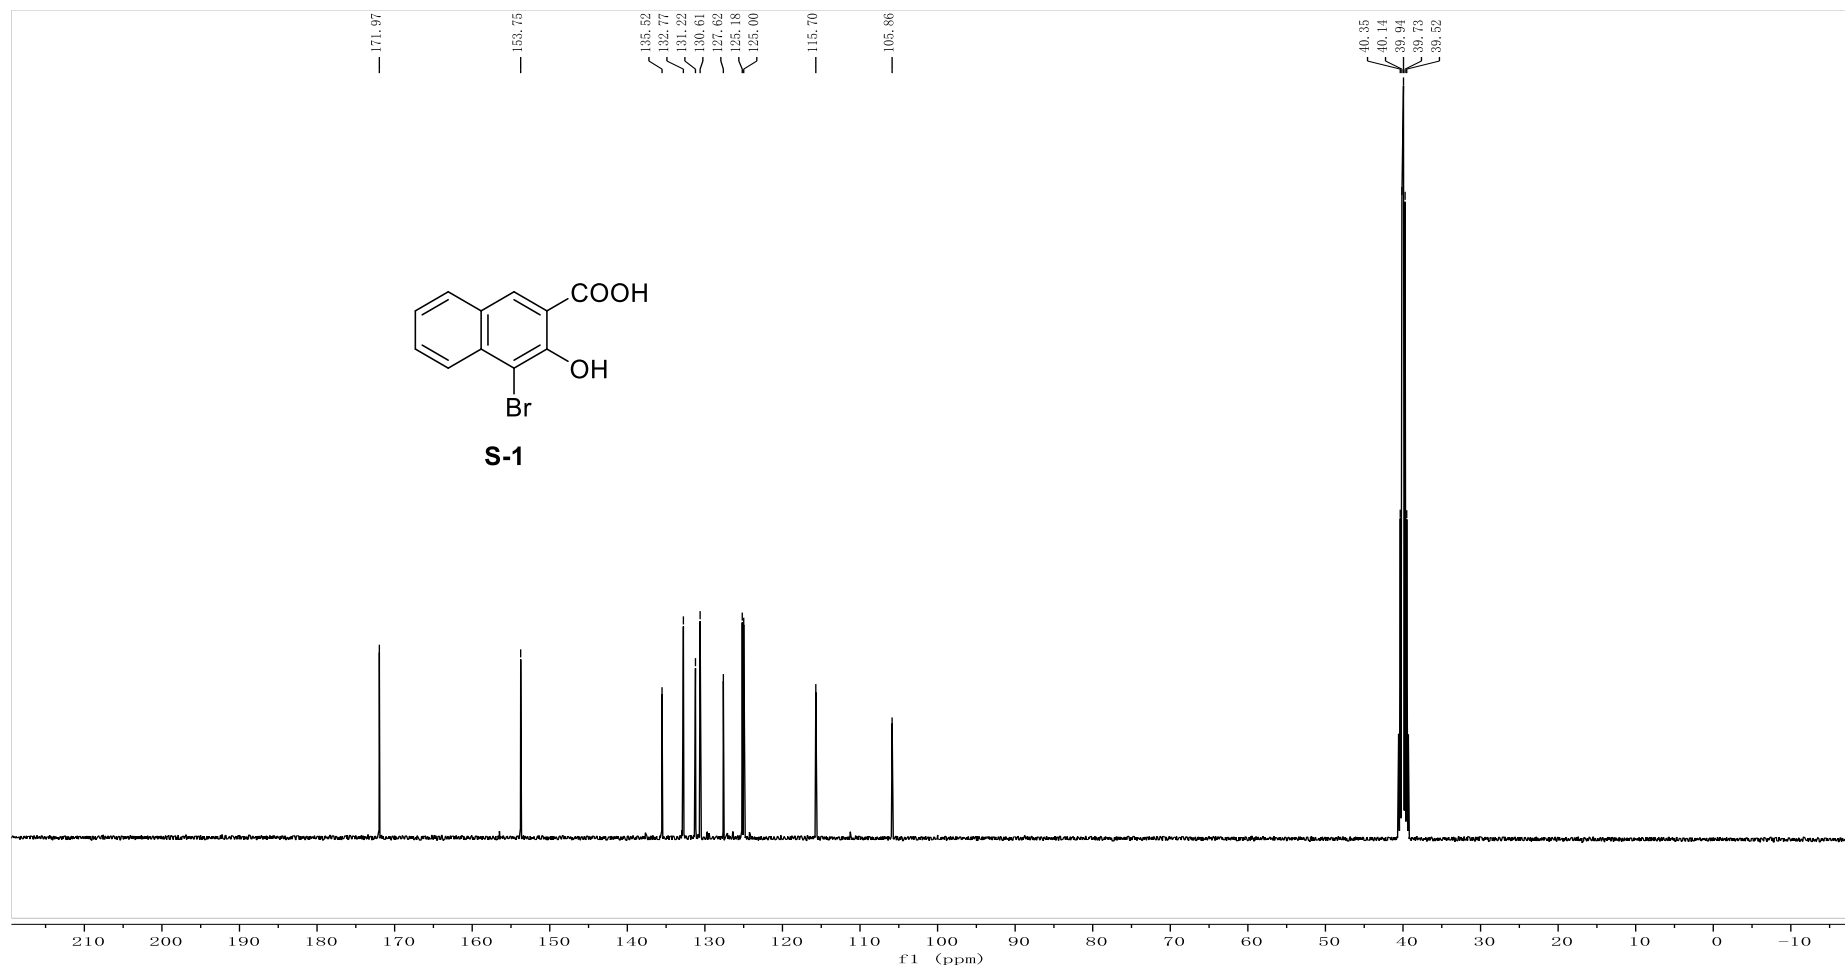

$^1\text{H}$  NMR-spectrum (400 MHz,  $\text{CDCl}_3$ ) of **S-2**

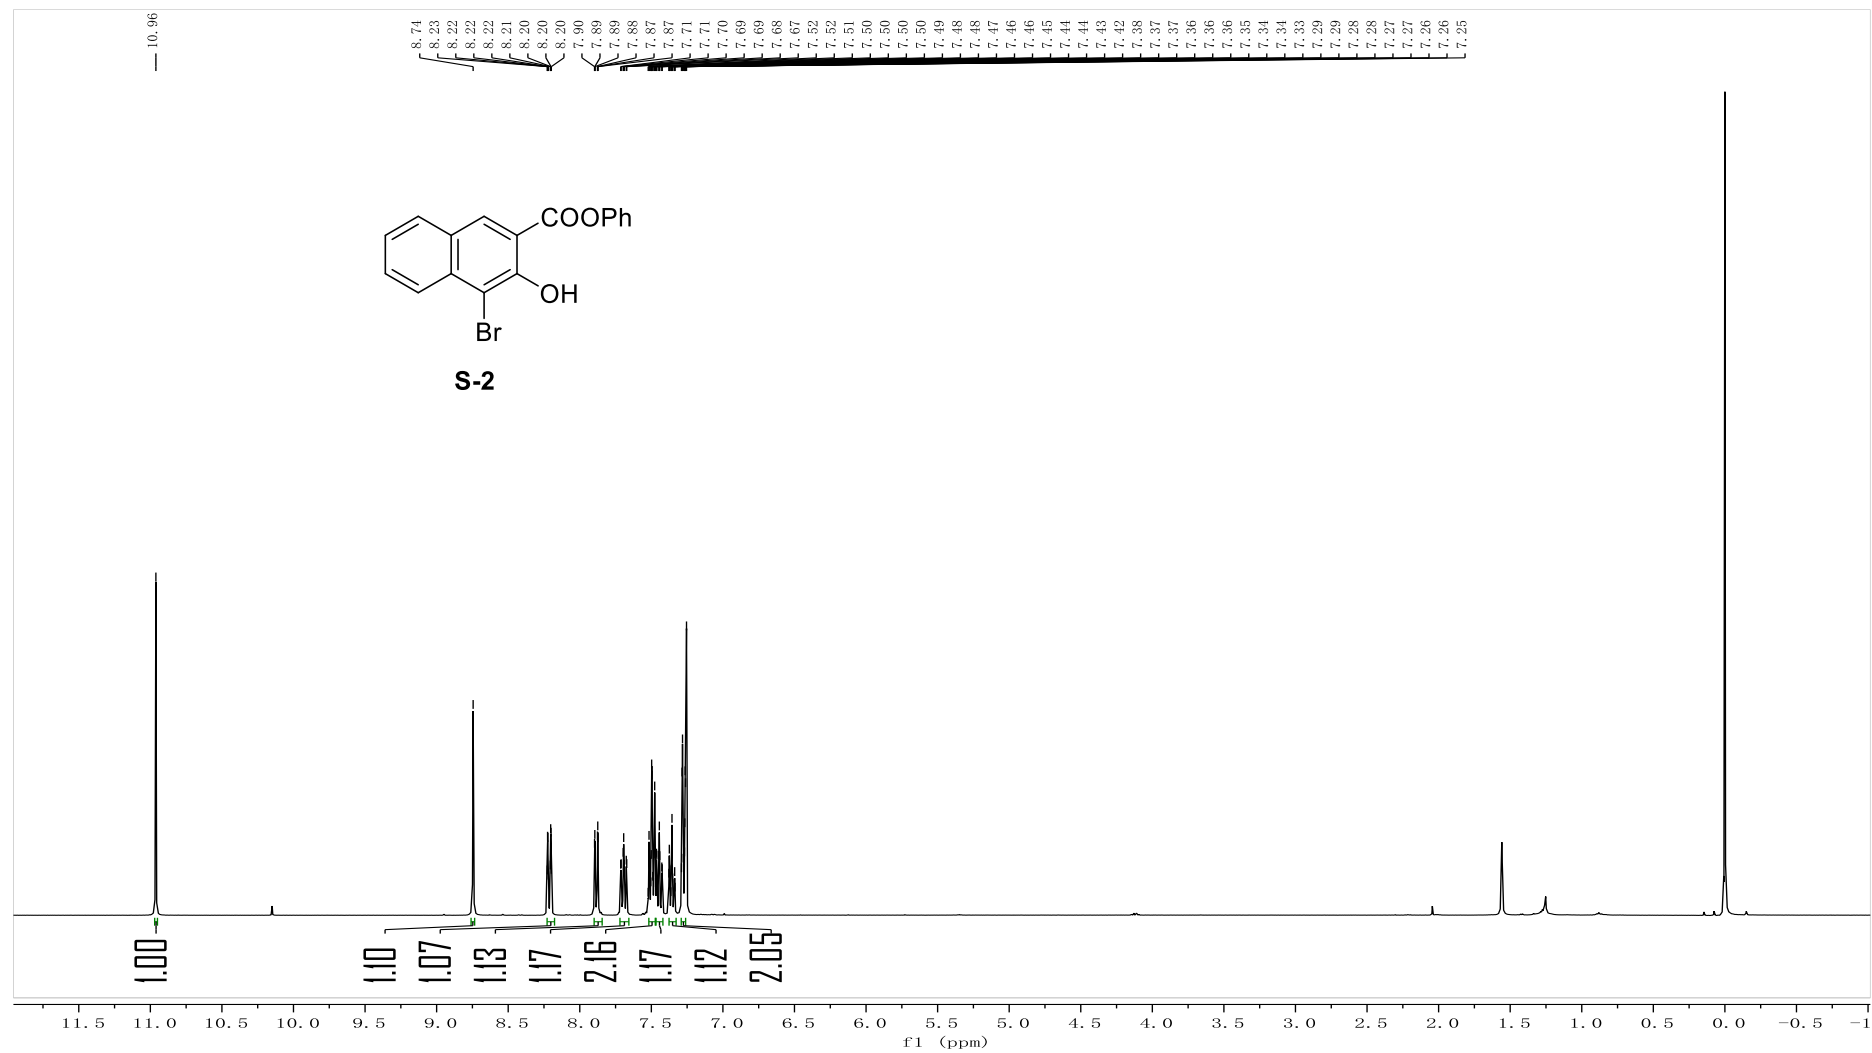

$^{13}\text{C}$  NMR-spectrum (101 MHz,  $\text{CDCl}_3$ ) of **S-2**

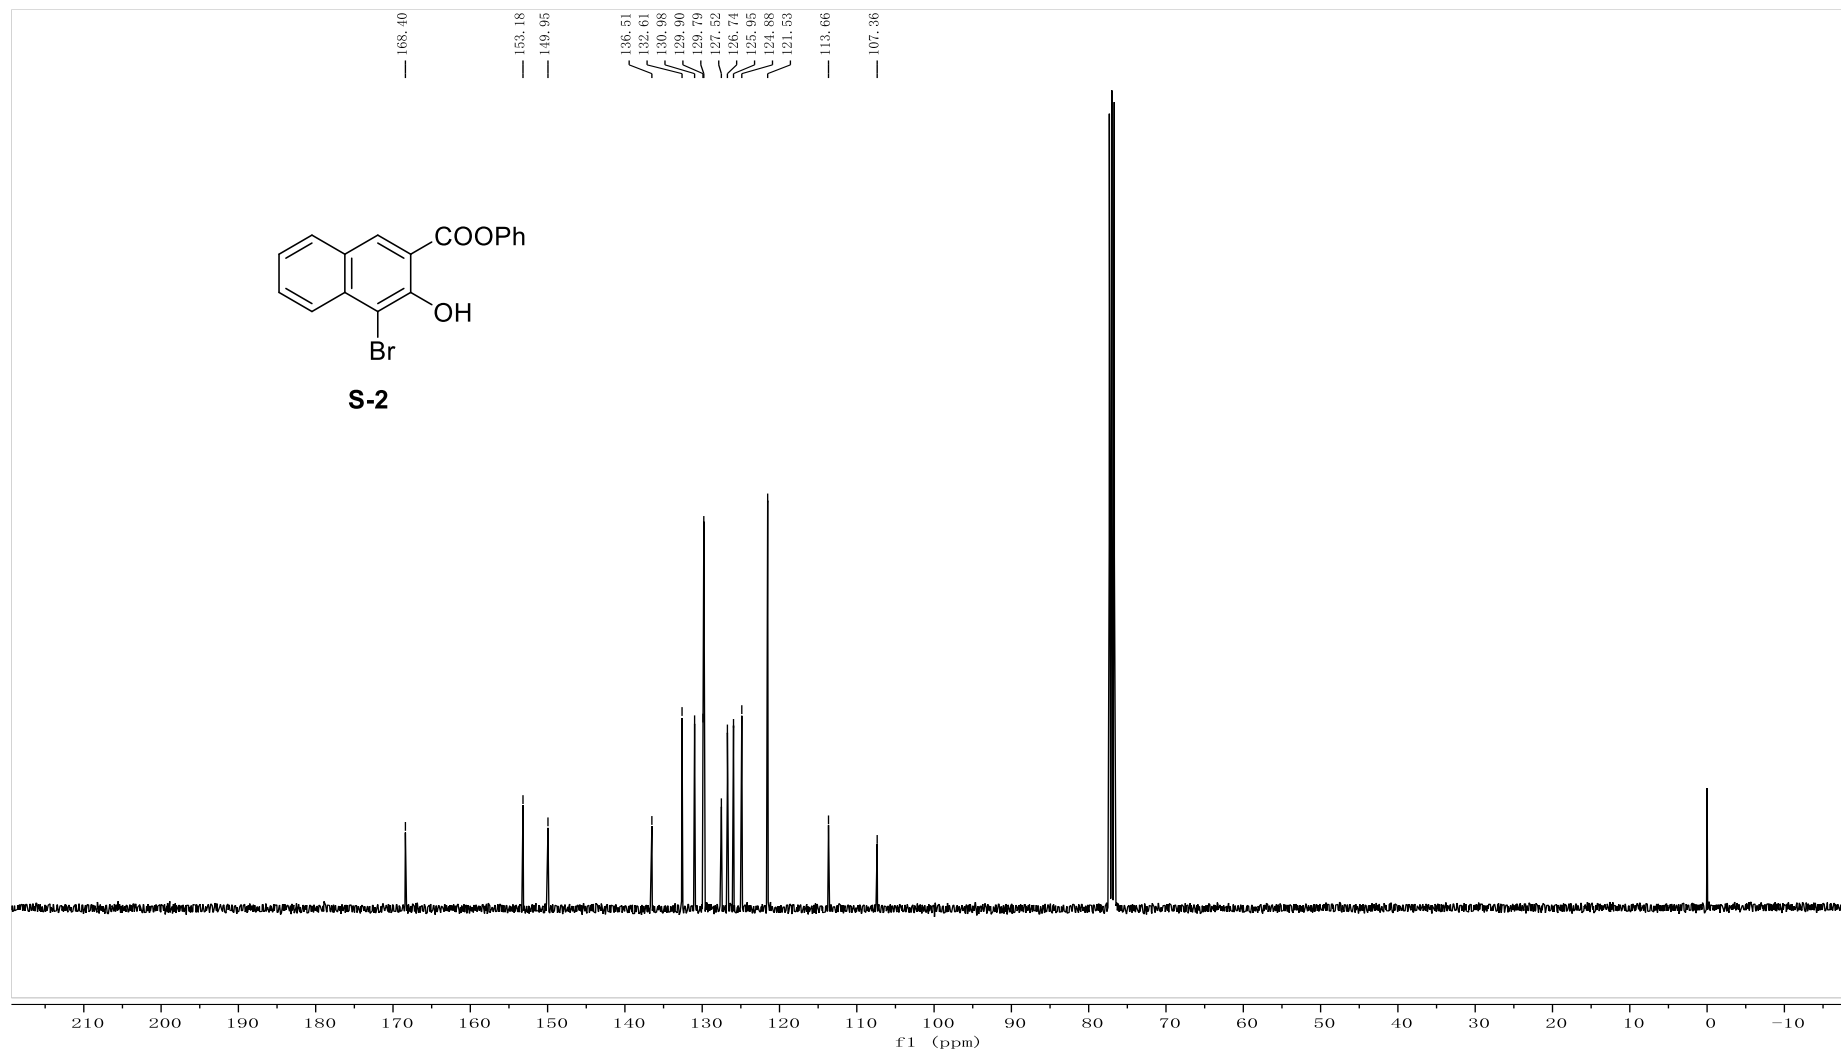

$^1\text{H}$  NMR-spectrum (400 MHz,  $\text{CDCl}_3$ ) of **1k**

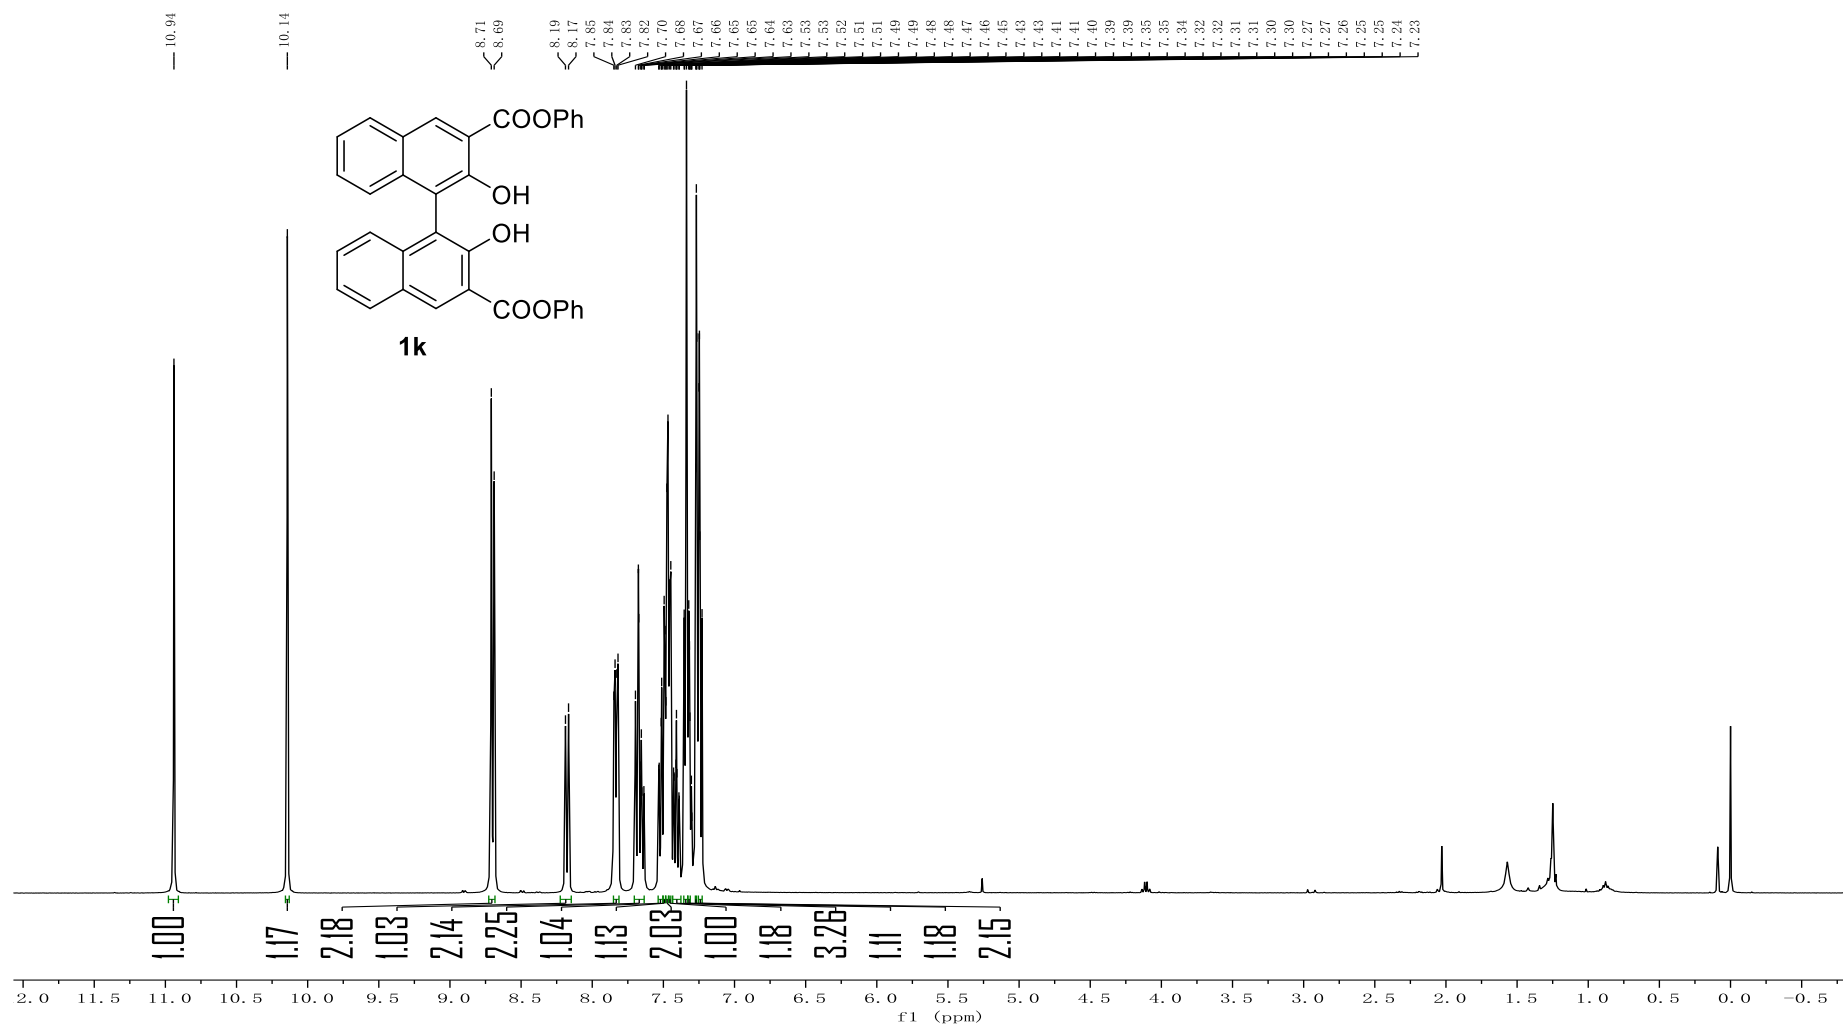



$^{13}\text{C}$  NMR-spectrum (126 MHz,  $\text{CDCl}_3$ ) of **1k**

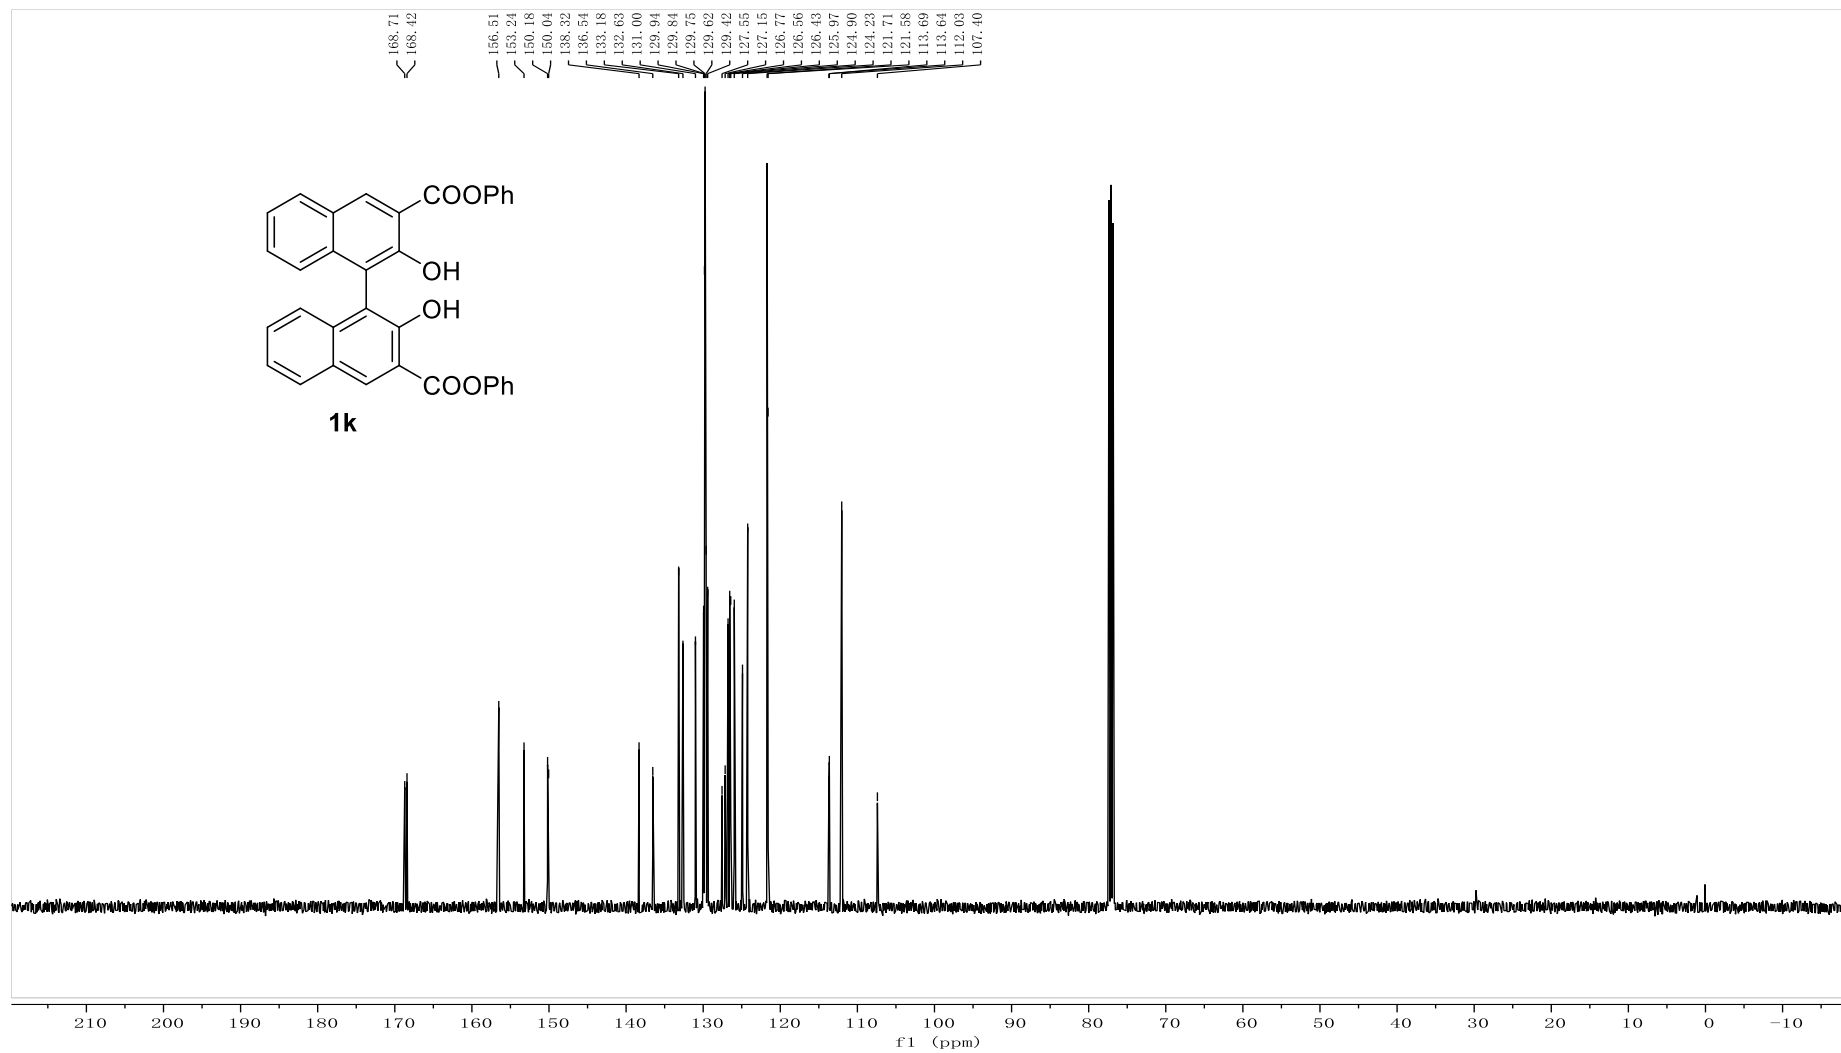

$^1\text{H}$  NMR-spectrum (400 MHz,  $\text{CDCl}_3$ ) of **S-3c**

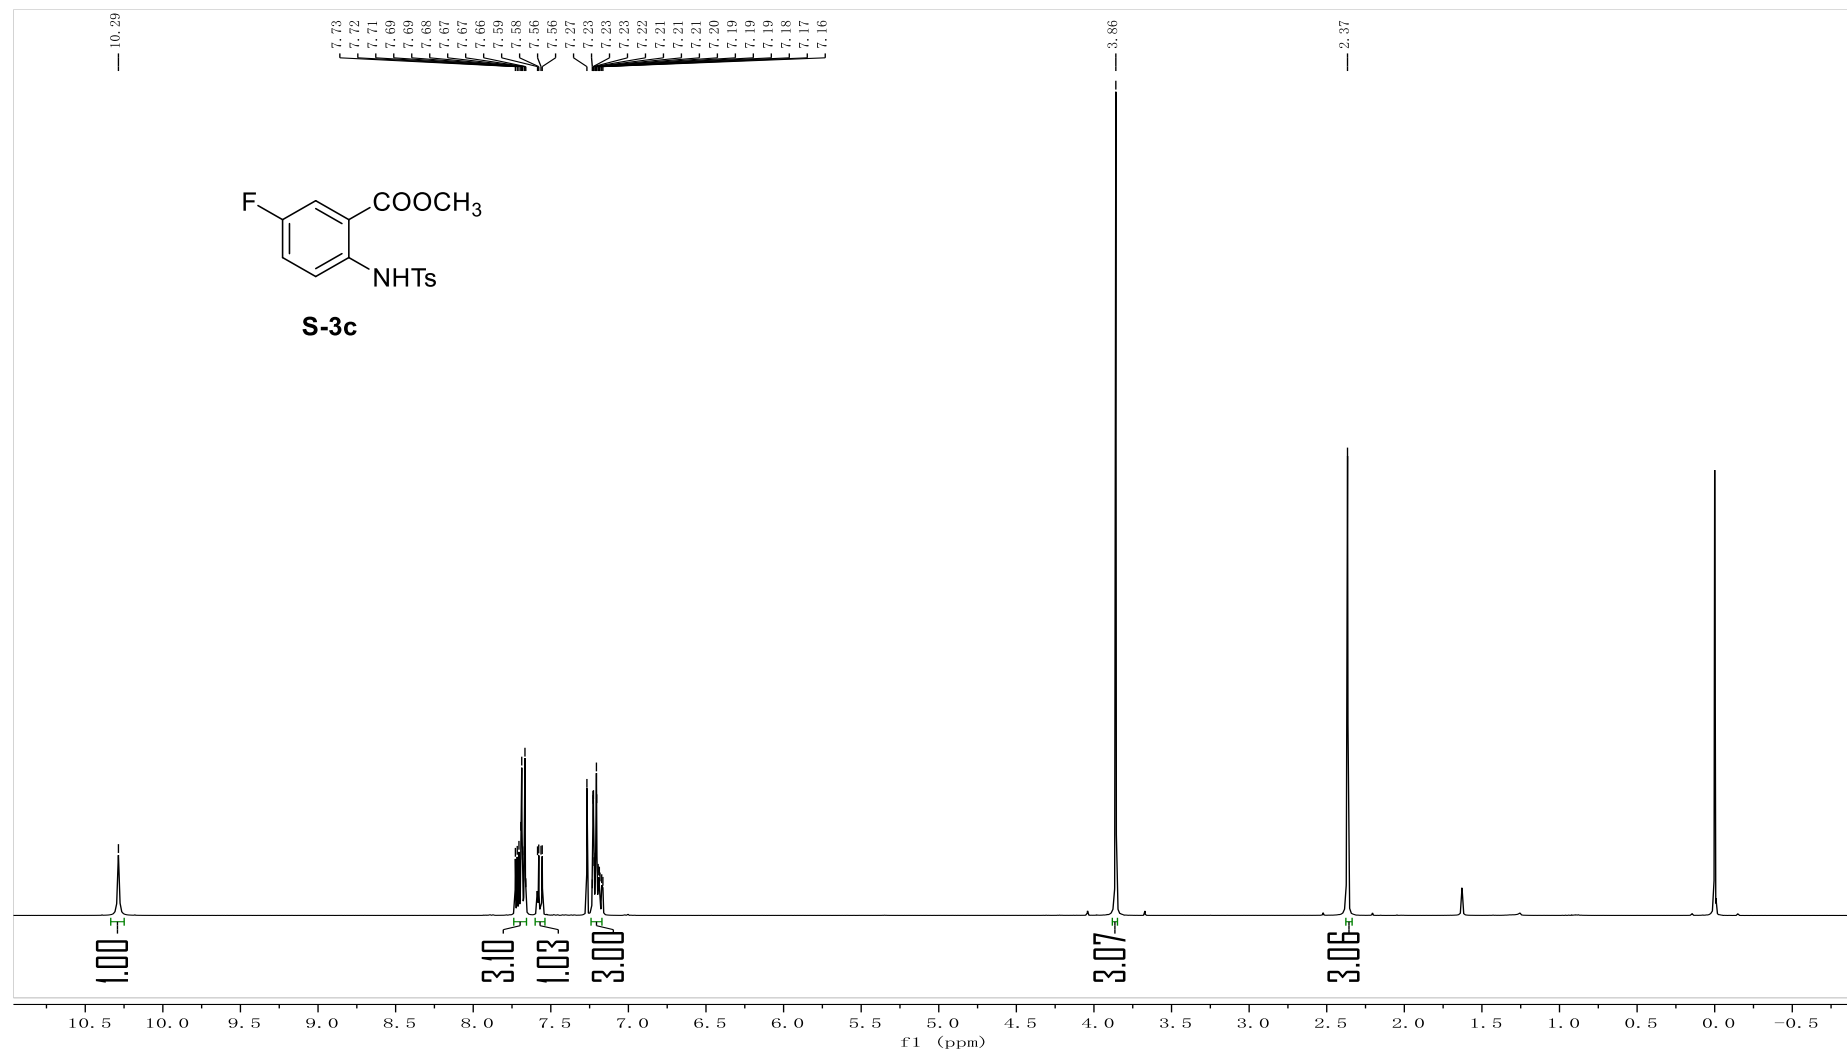

$^{13}\text{C}$  NMR-spectrum (101 MHz,  $\text{CDCl}_3$ ) of **S-3c**

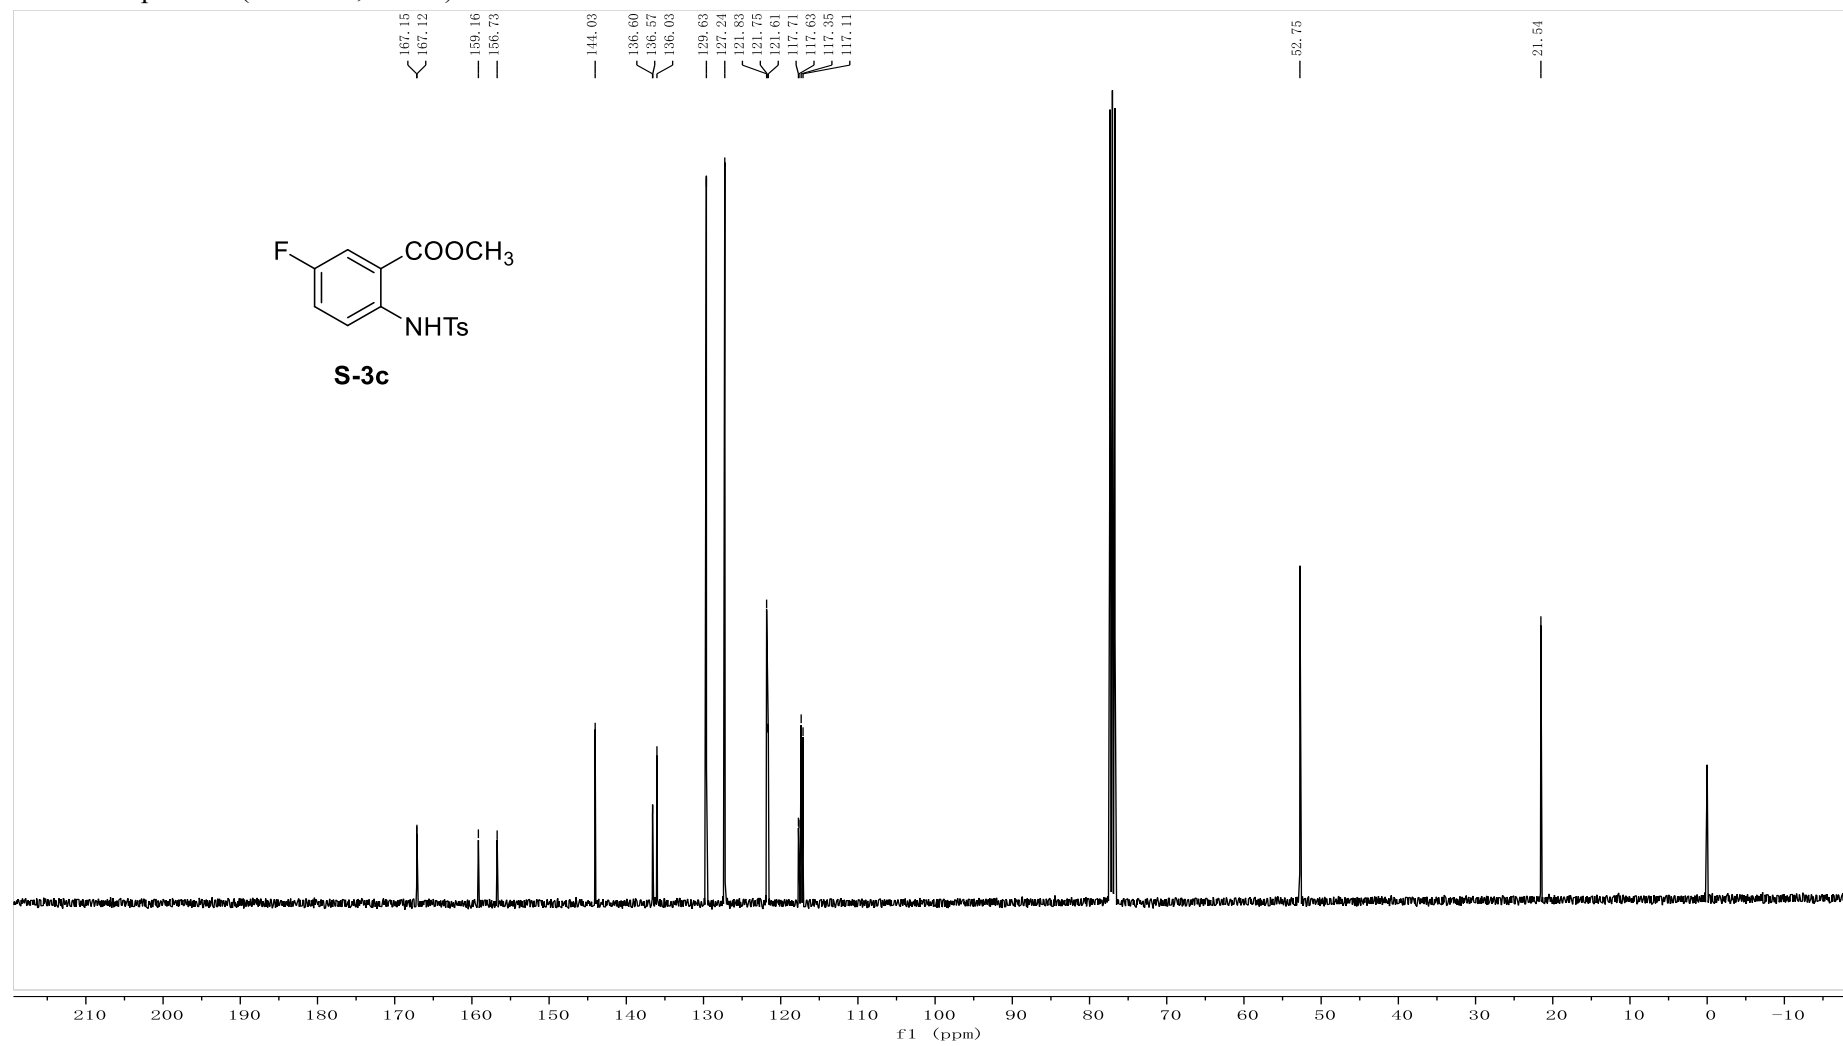

$^{19}\text{F}$  NMR-spectrum (376 MHz,  $\text{CDCl}_3$ ) of **S-3c**

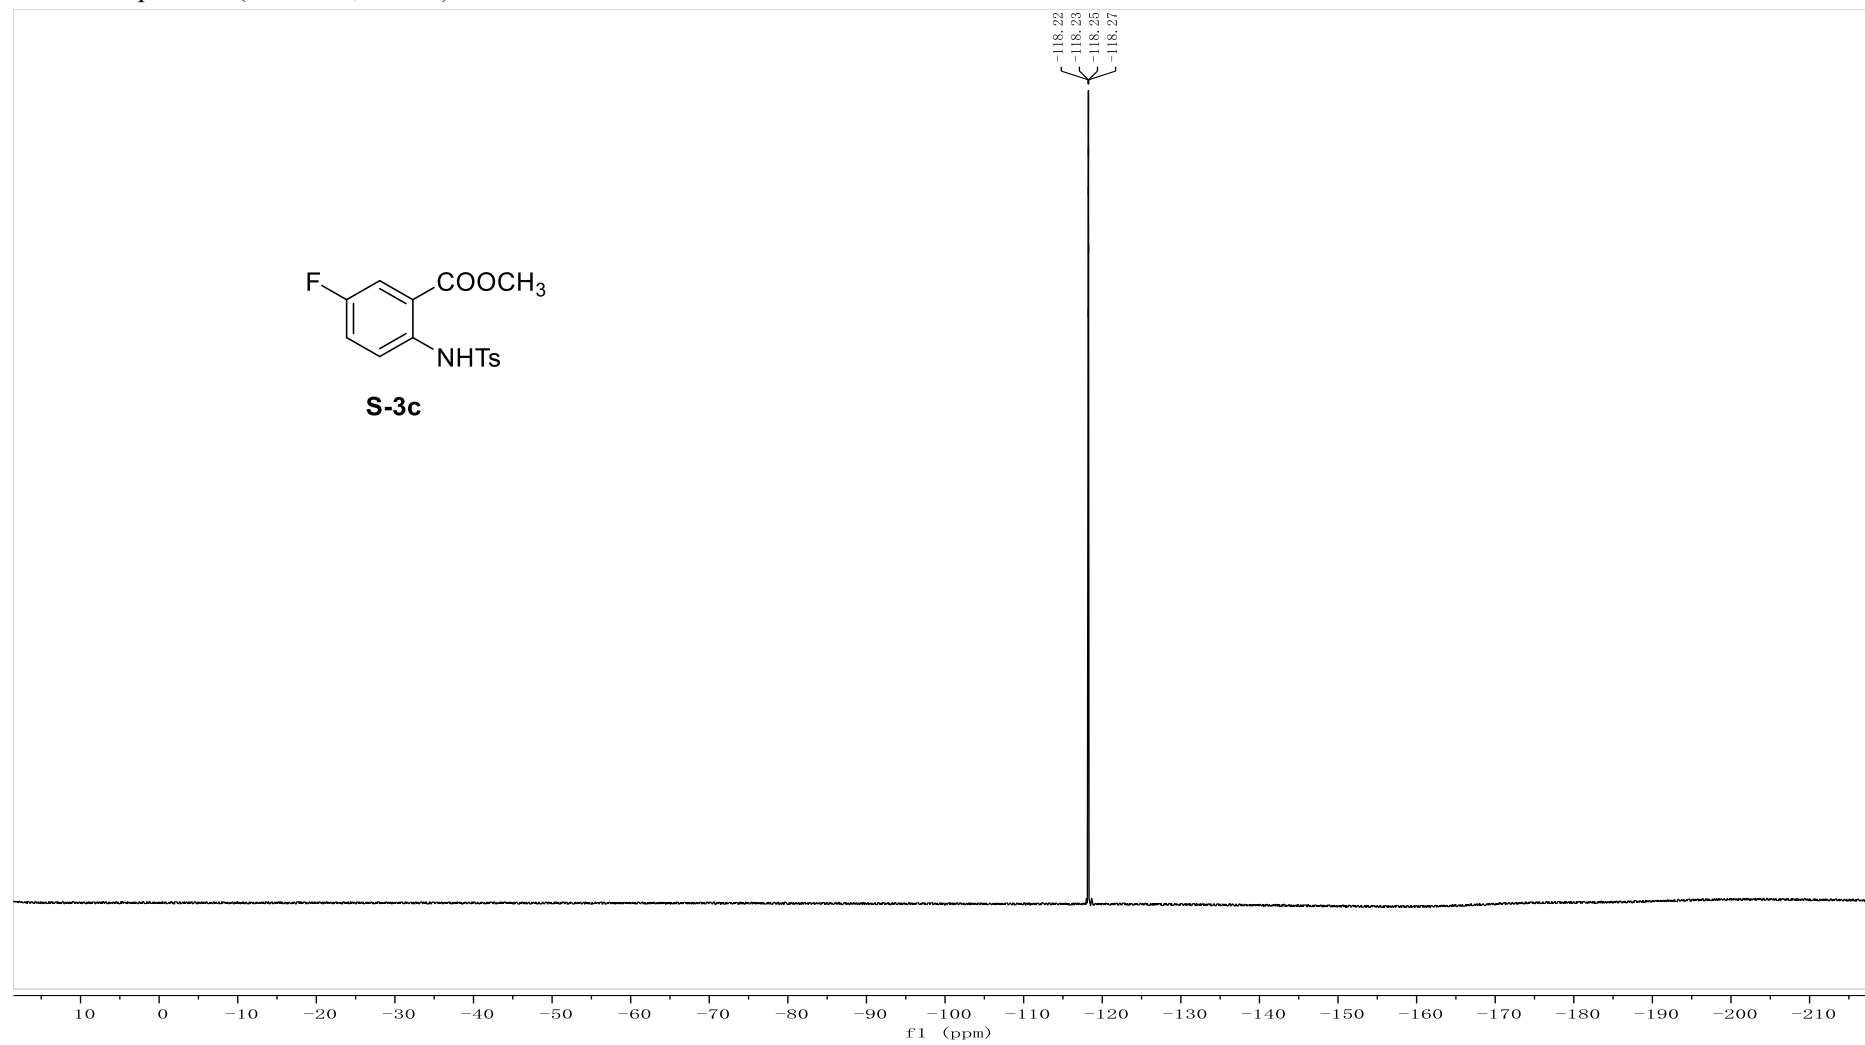

<sup>1</sup>H NMR-spectrum (400 MHz, CDCl<sub>3</sub>) of **S-3d**

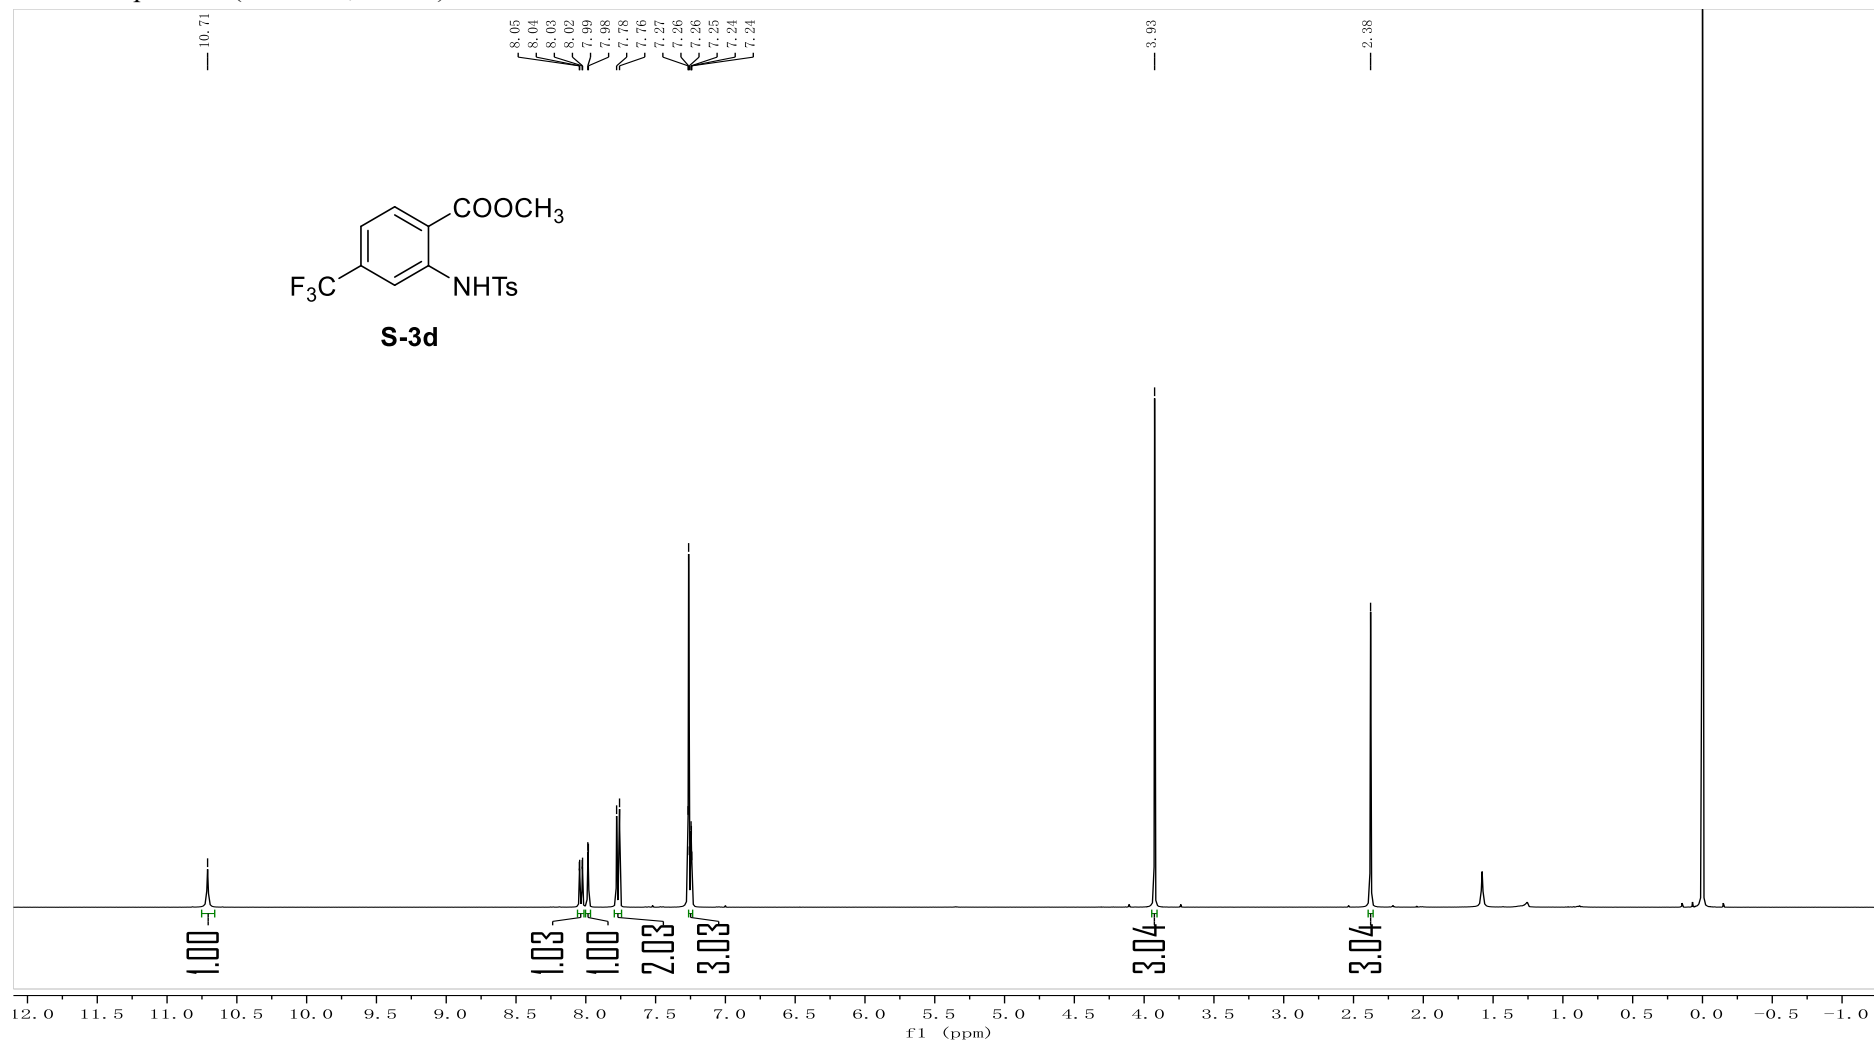

$^{13}\text{C}$  NMR-spectrum (101 MHz,  $\text{CDCl}_3$ ) of **S-3d**

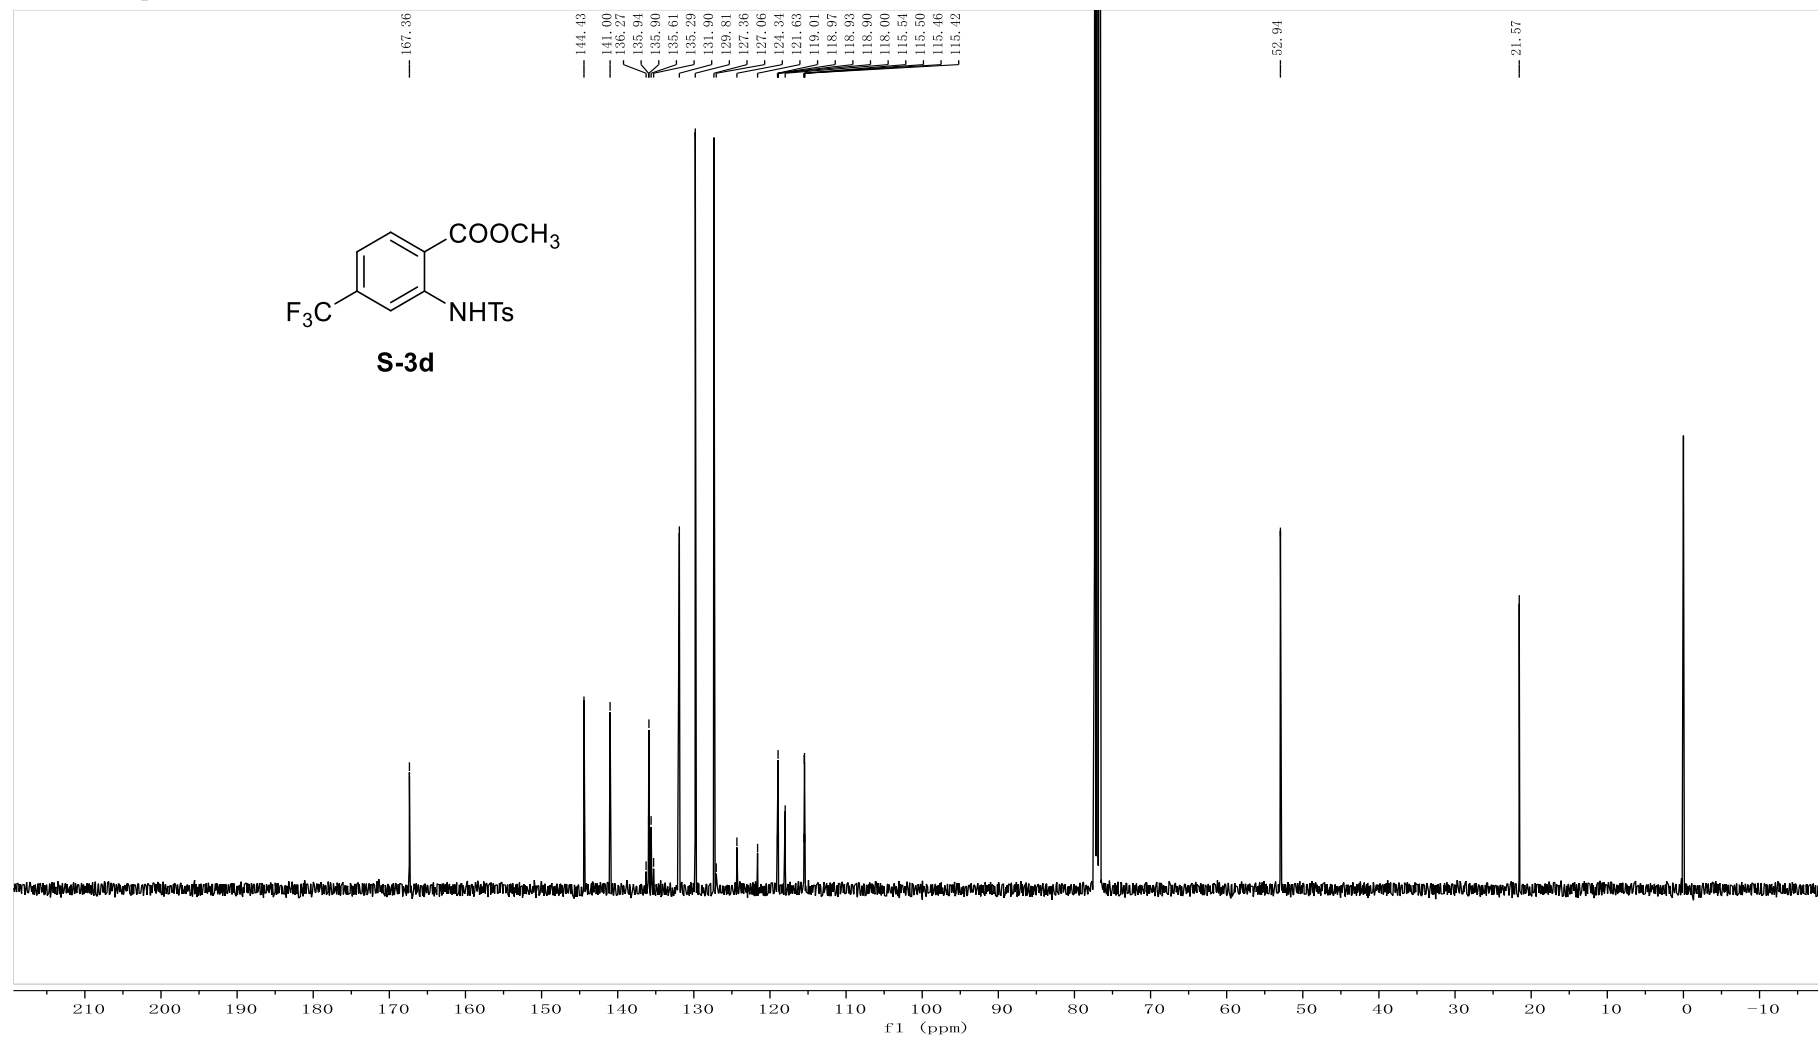

$^{19}\text{F}$  NMR-spectrum (376 MHz,  $\text{CDCl}_3$ ) of **S-3d**

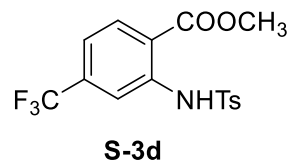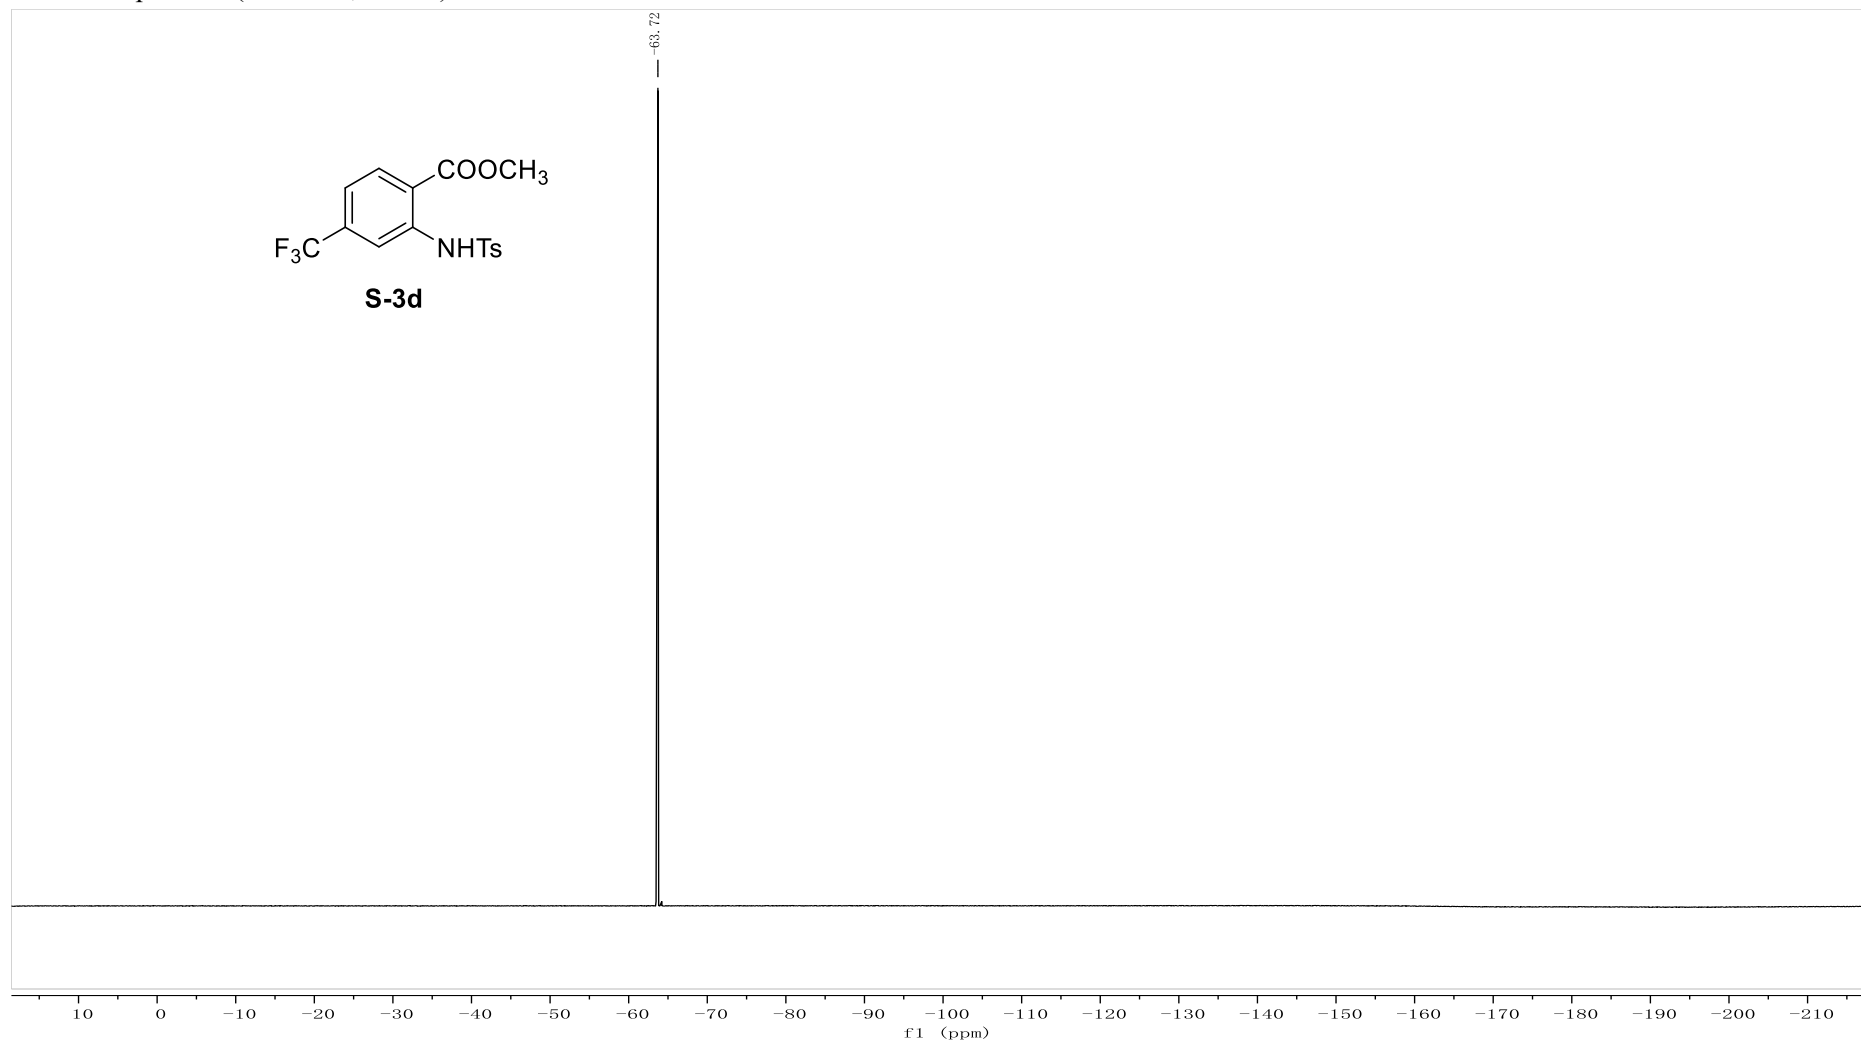

<sup>1</sup>H NMR-spectrum (400 MHz, DMSO-*d*<sub>6</sub>) of **S-4c**

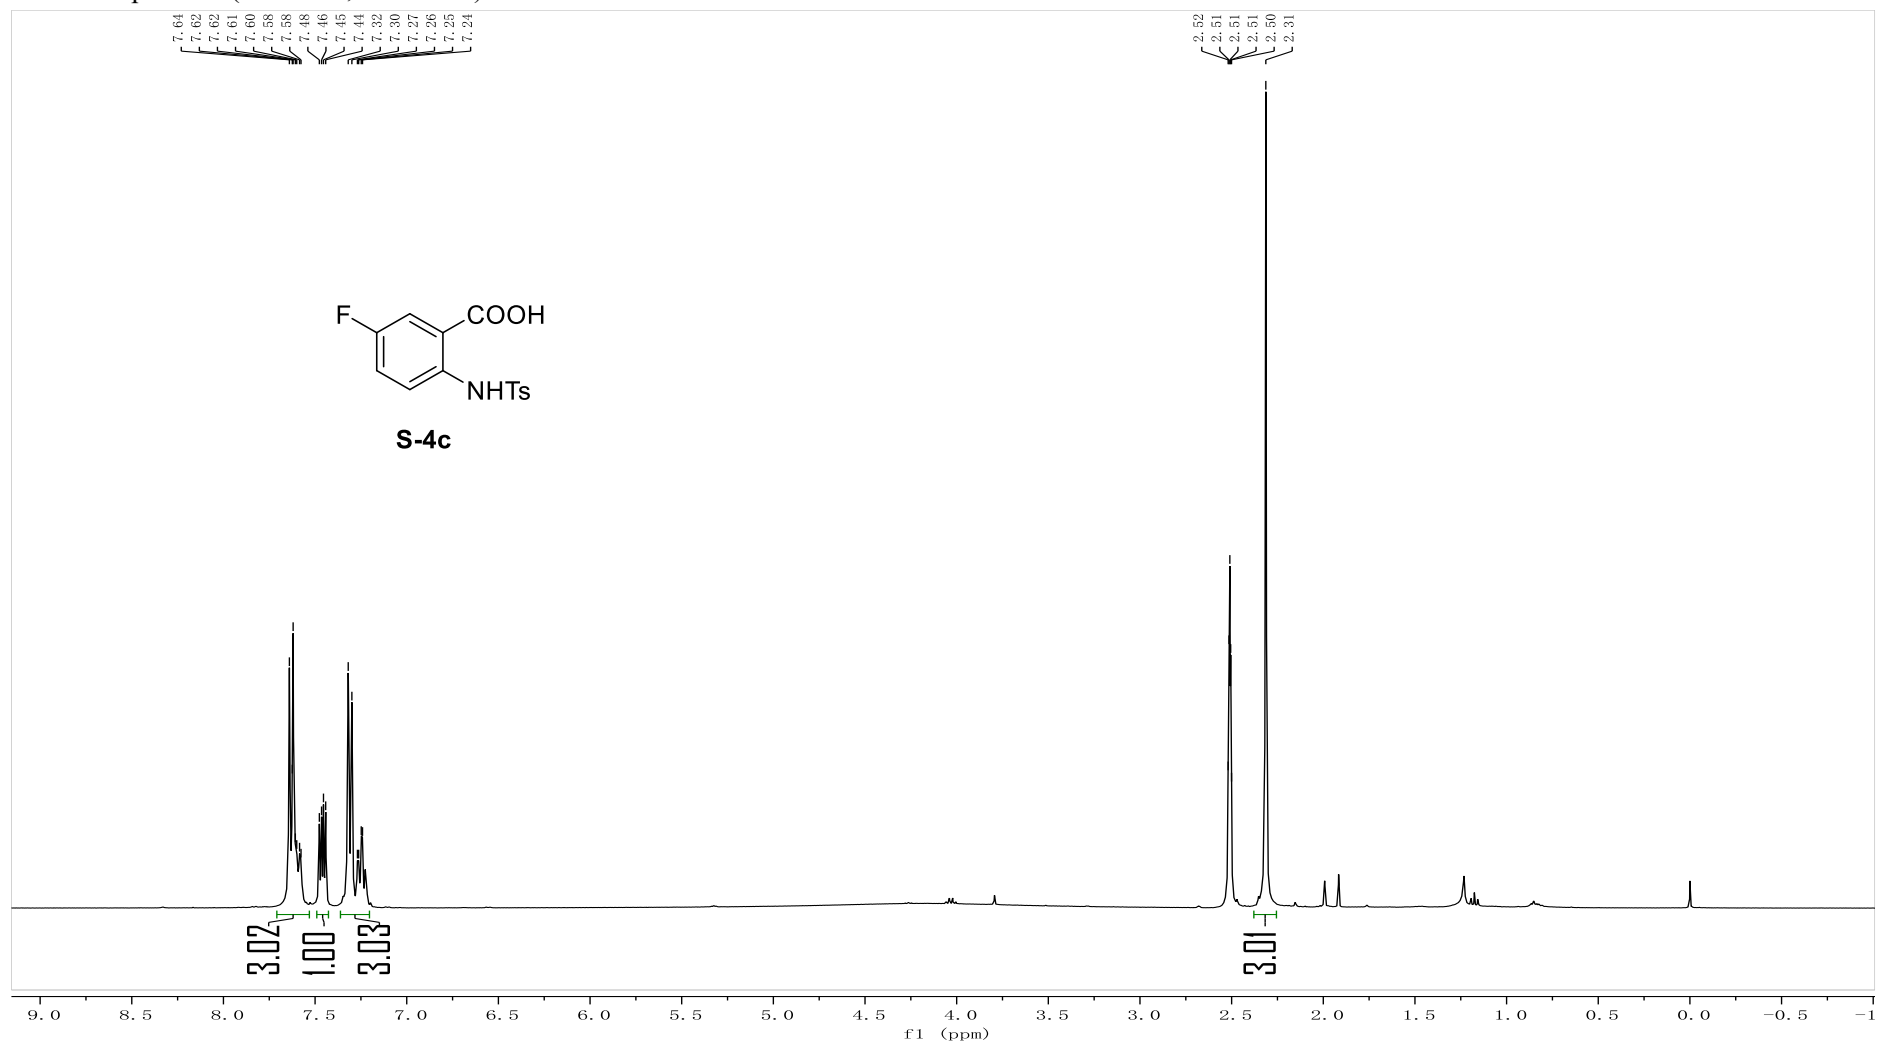



$^{13}\text{C}$  NMR-spectrum (126 MHz,  $\text{DMSO-}d_6$ ) of **S-4c**

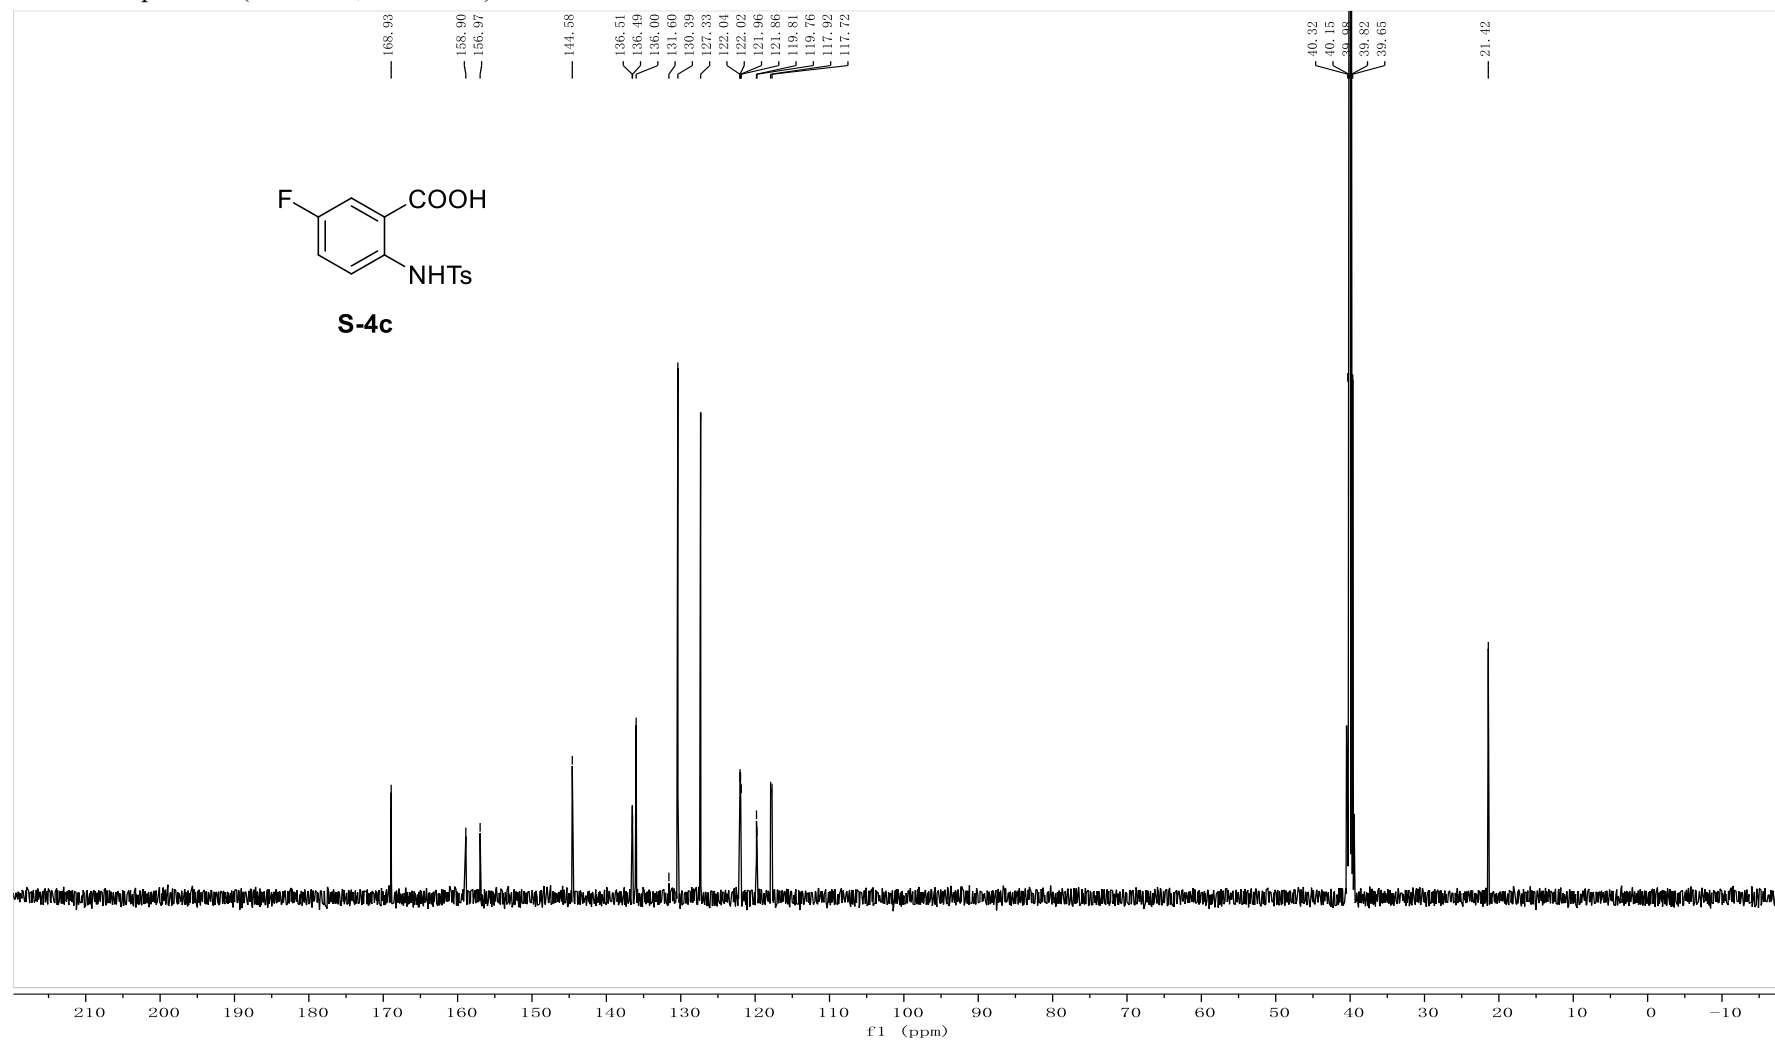

$^{19}\text{F}$  NMR-spectrum (471 MHz,  $\text{DMSO-}d_6$ ) of **S-4c**

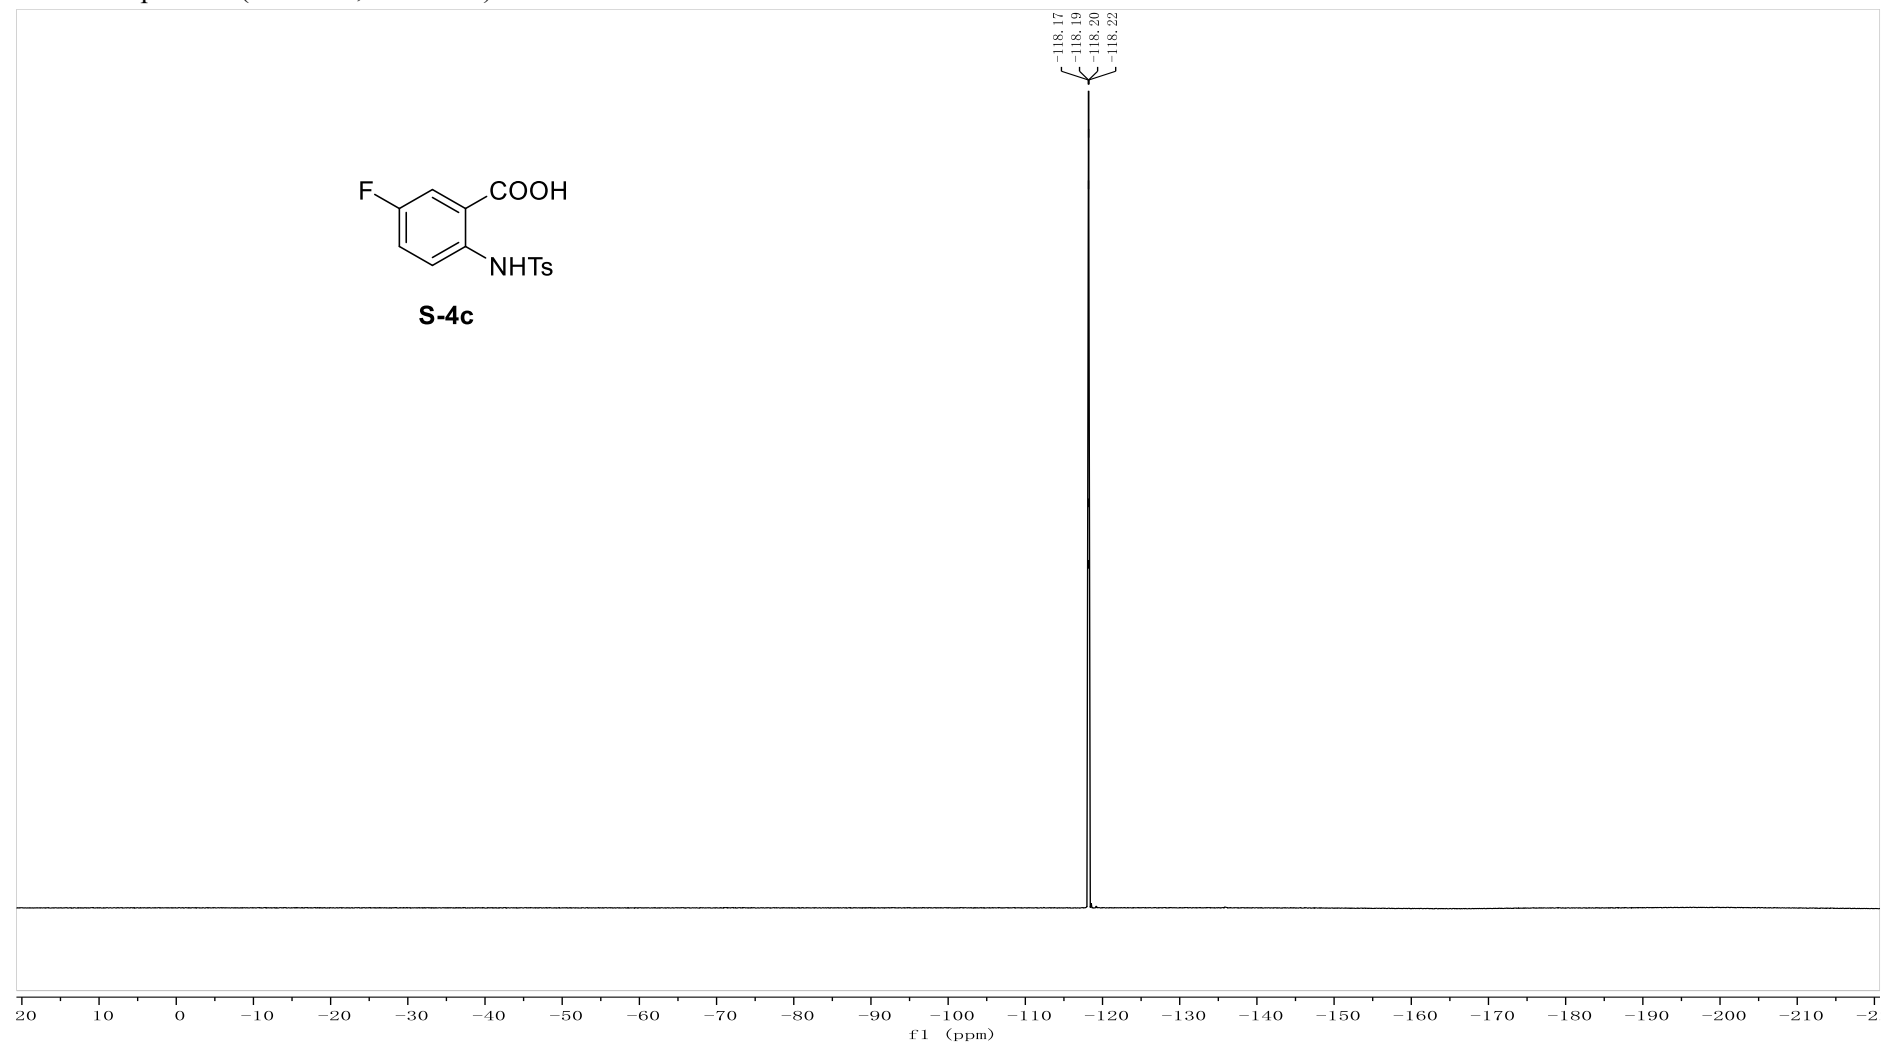

<sup>1</sup>H NMR-spectrum (400 MHz, DMSO-*d*<sub>6</sub>) of **S-4d**

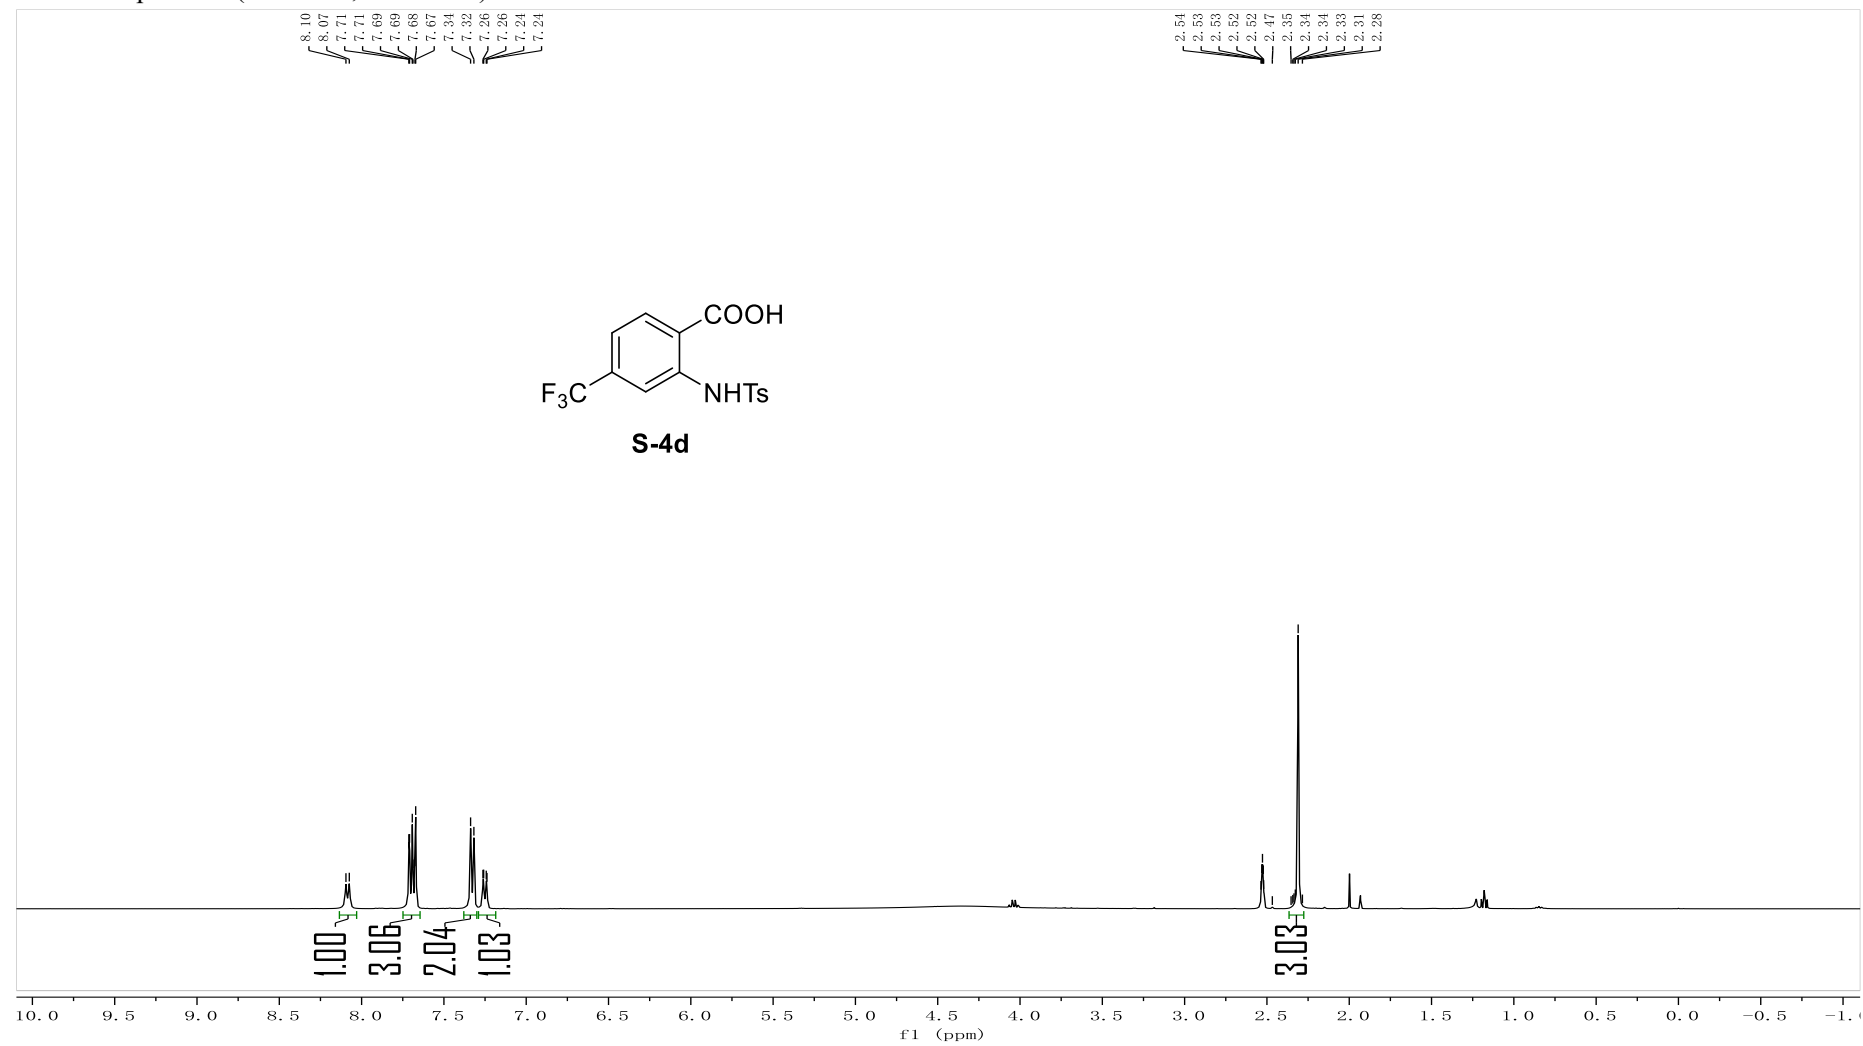

$^{13}\text{C}$  NMR-spectrum (101 MHz,  $\text{DMSO-}d_6$ ) of **S-4d**

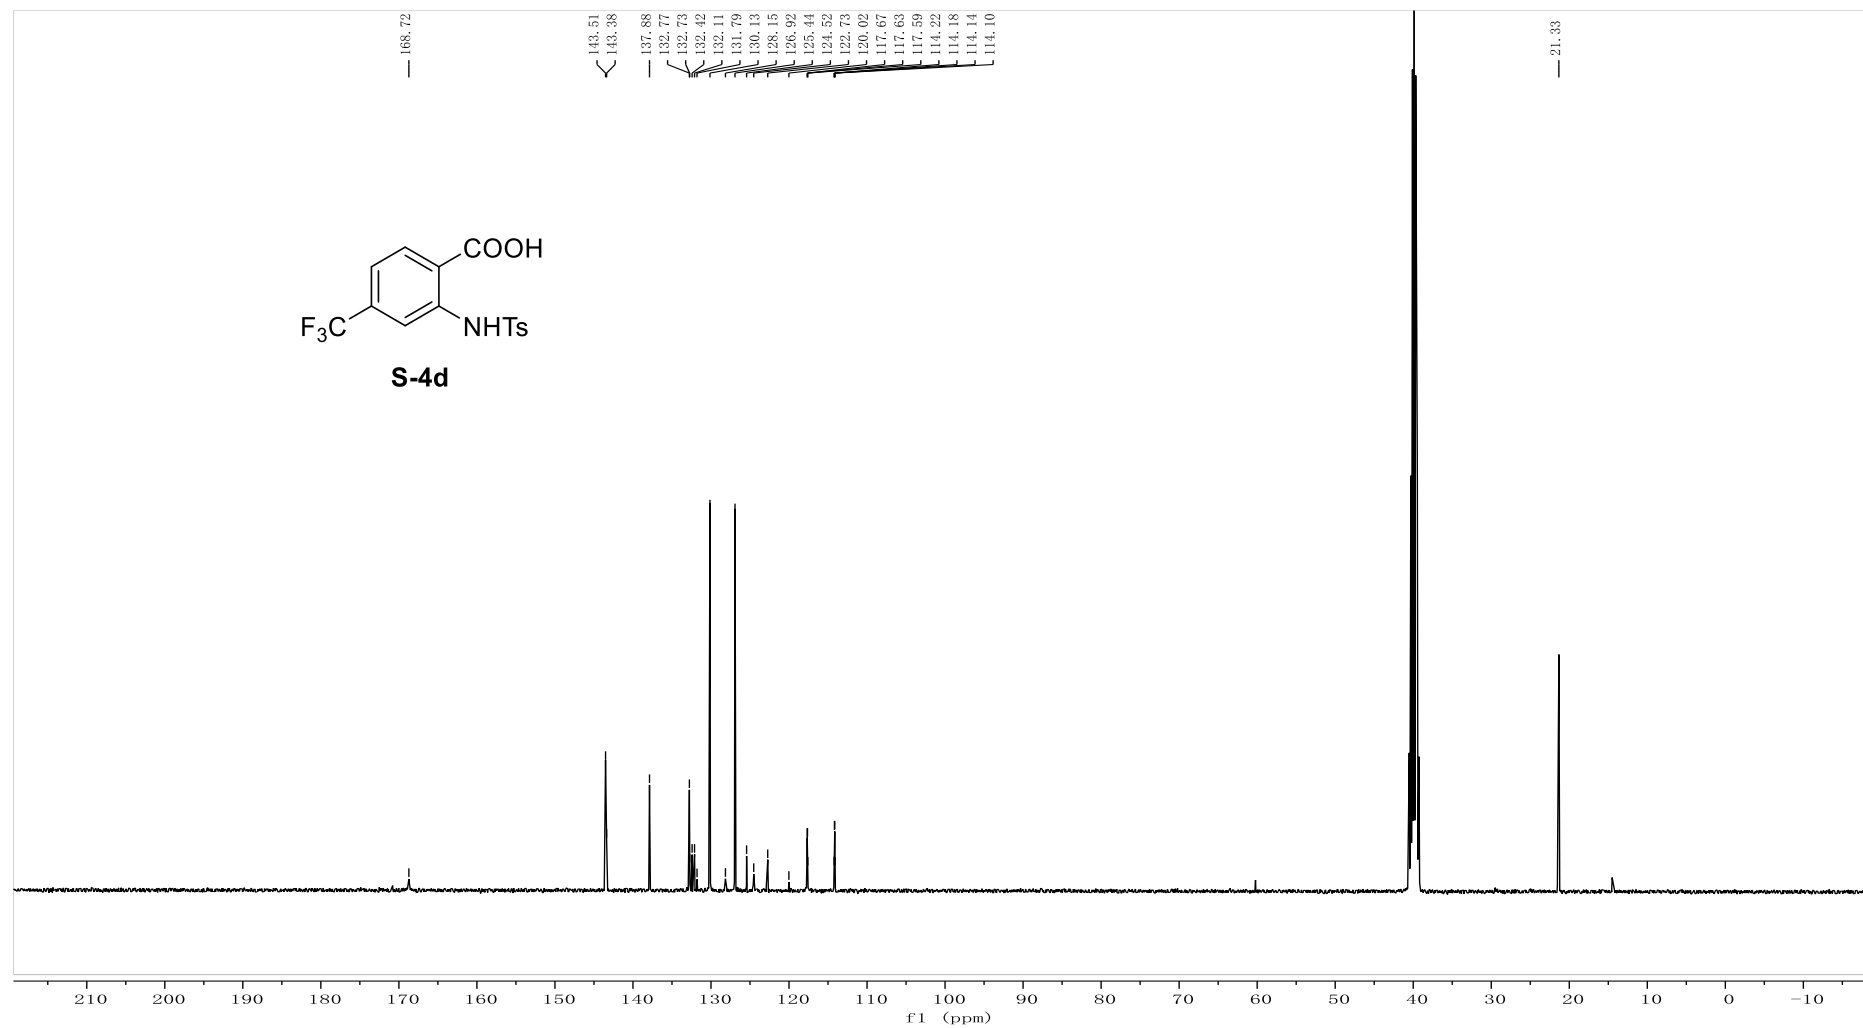

$^{19}\text{F}$  NMR-spectrum (376 MHz,  $\text{DMSO-}d_6$ ) of **S-4d**

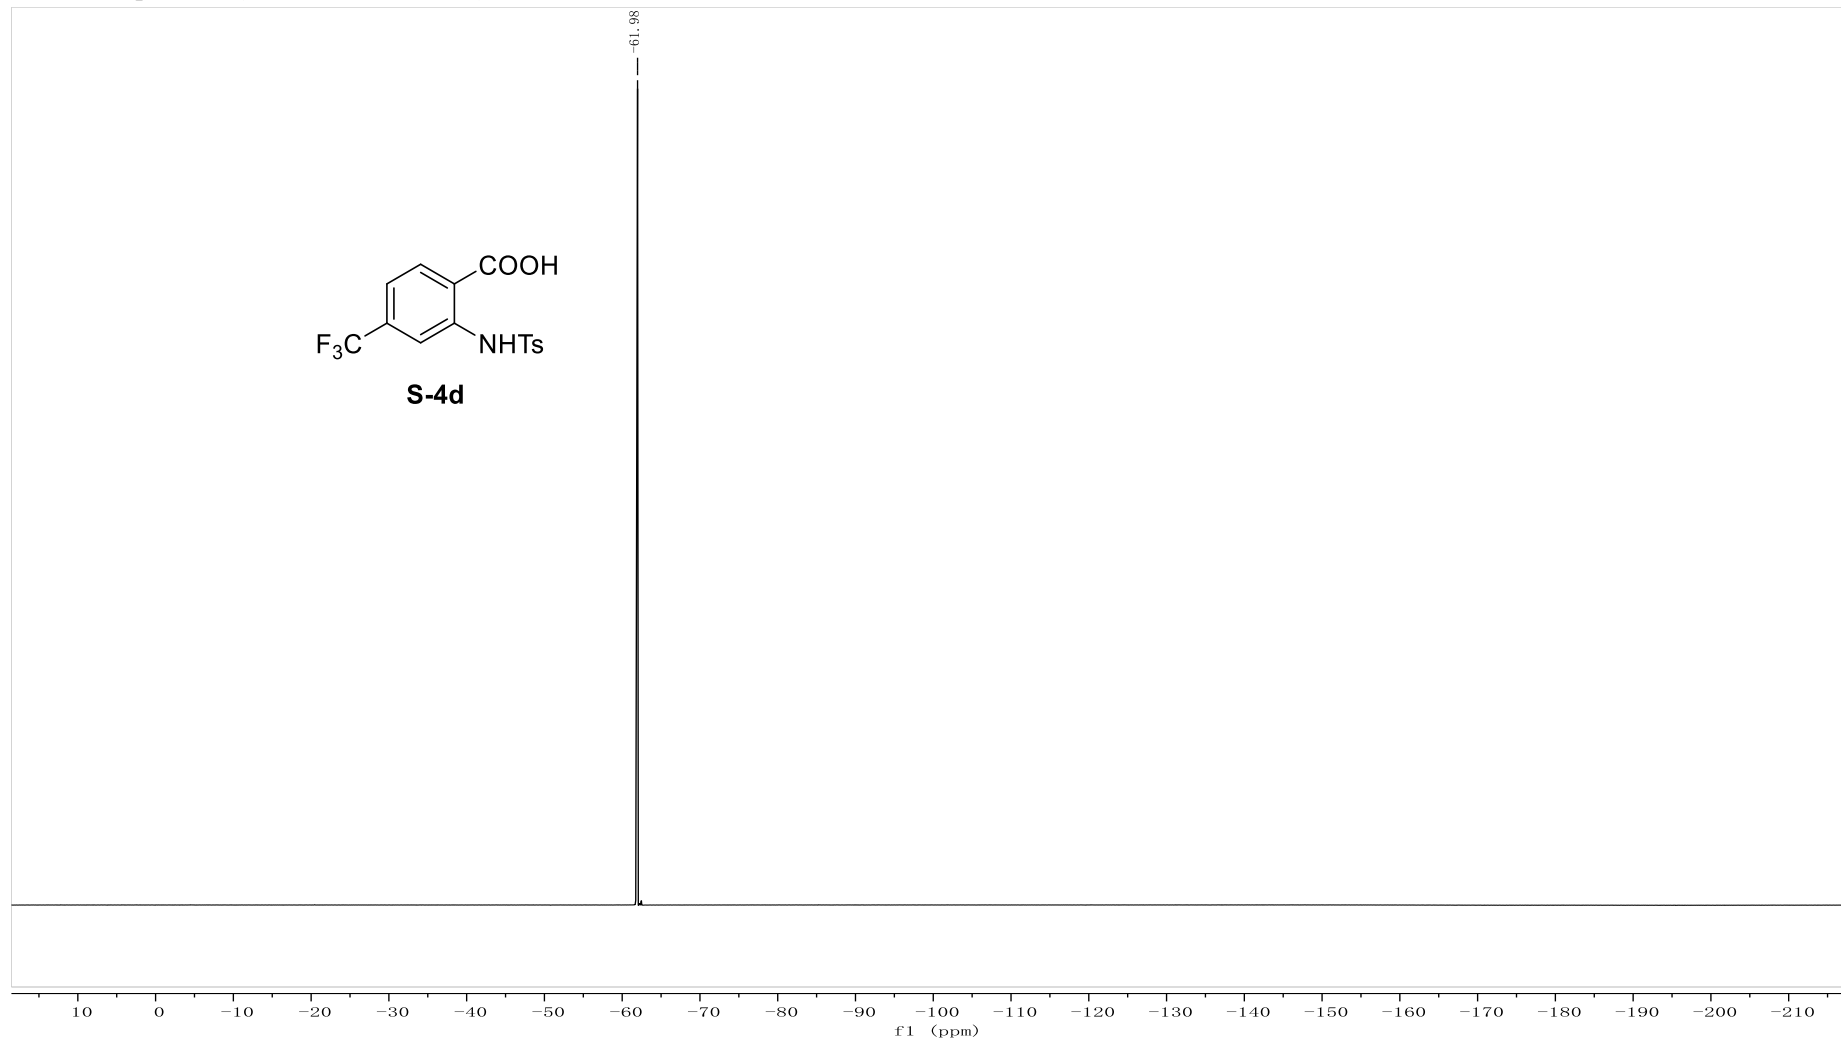

<sup>1</sup>H NMR-spectrum (500 MHz, DMSO-*d*<sub>6</sub>) of **S-5**

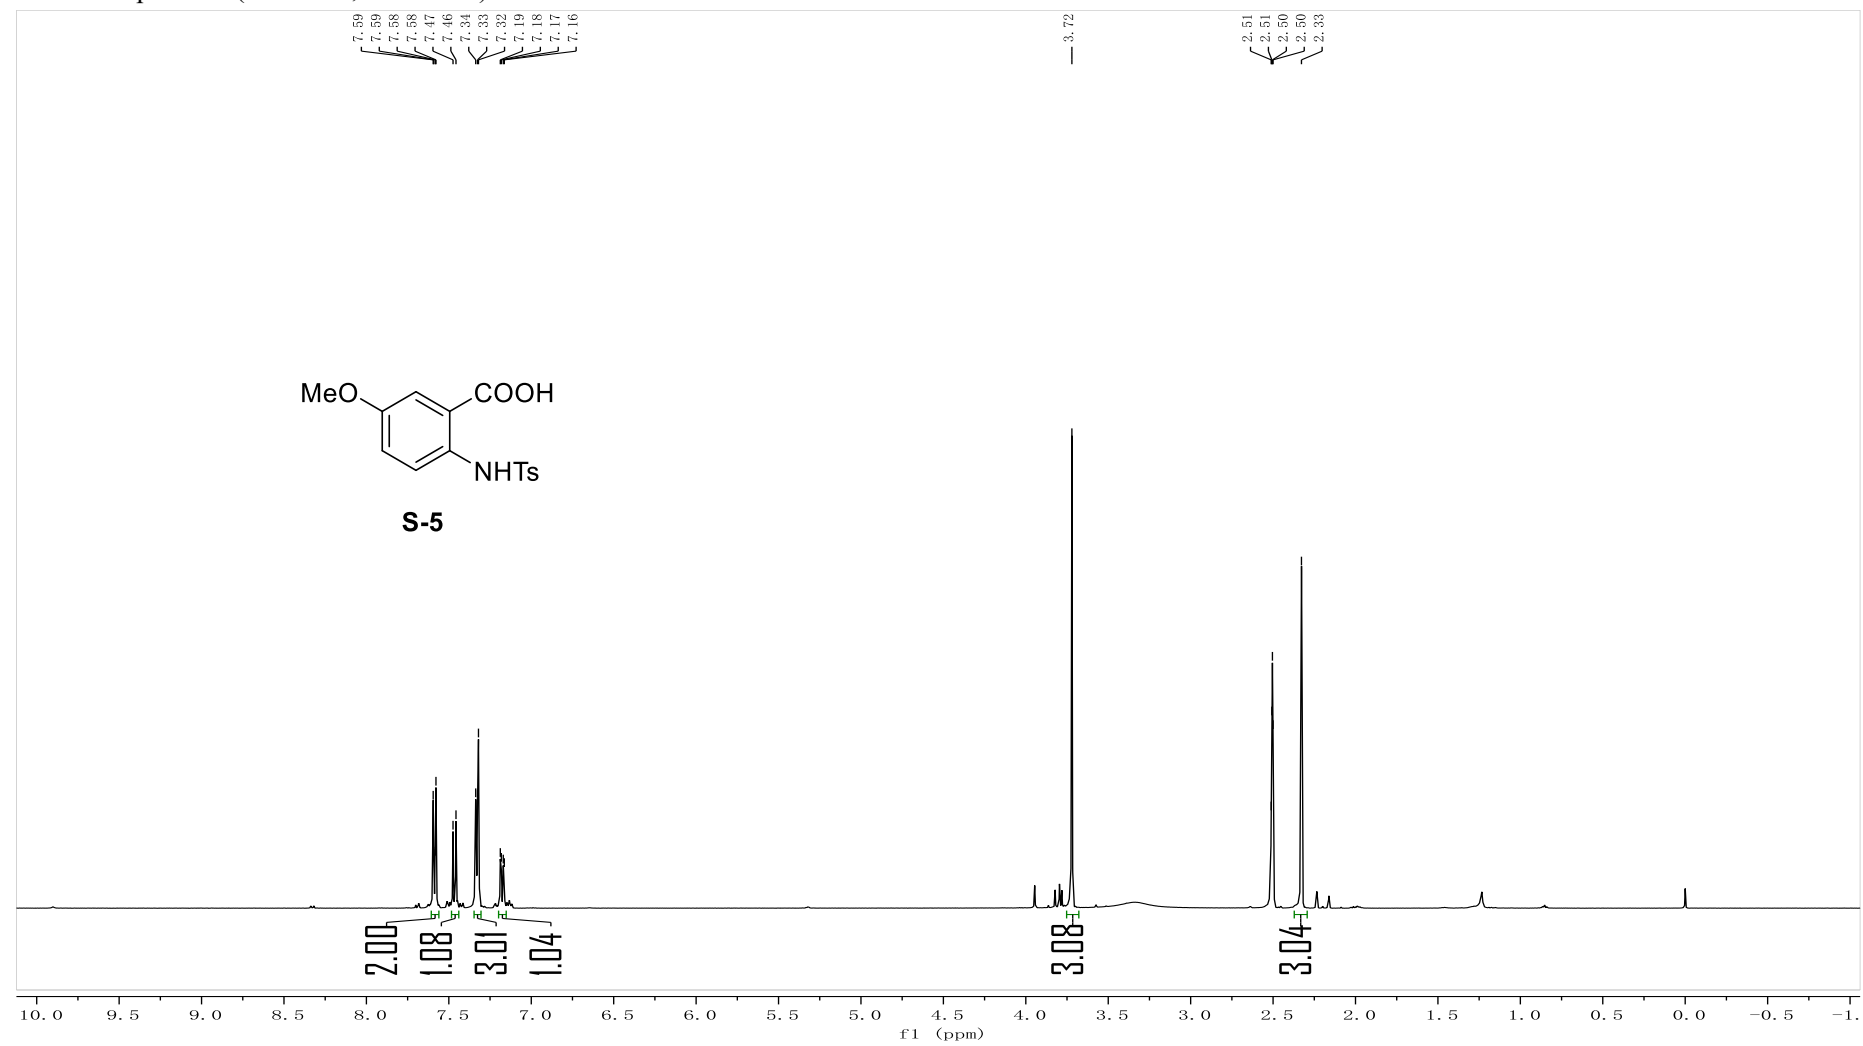

<sup>13</sup>C NMR-spectrum (126 MHz, DMSO-*d*<sub>6</sub>) of **S-5**

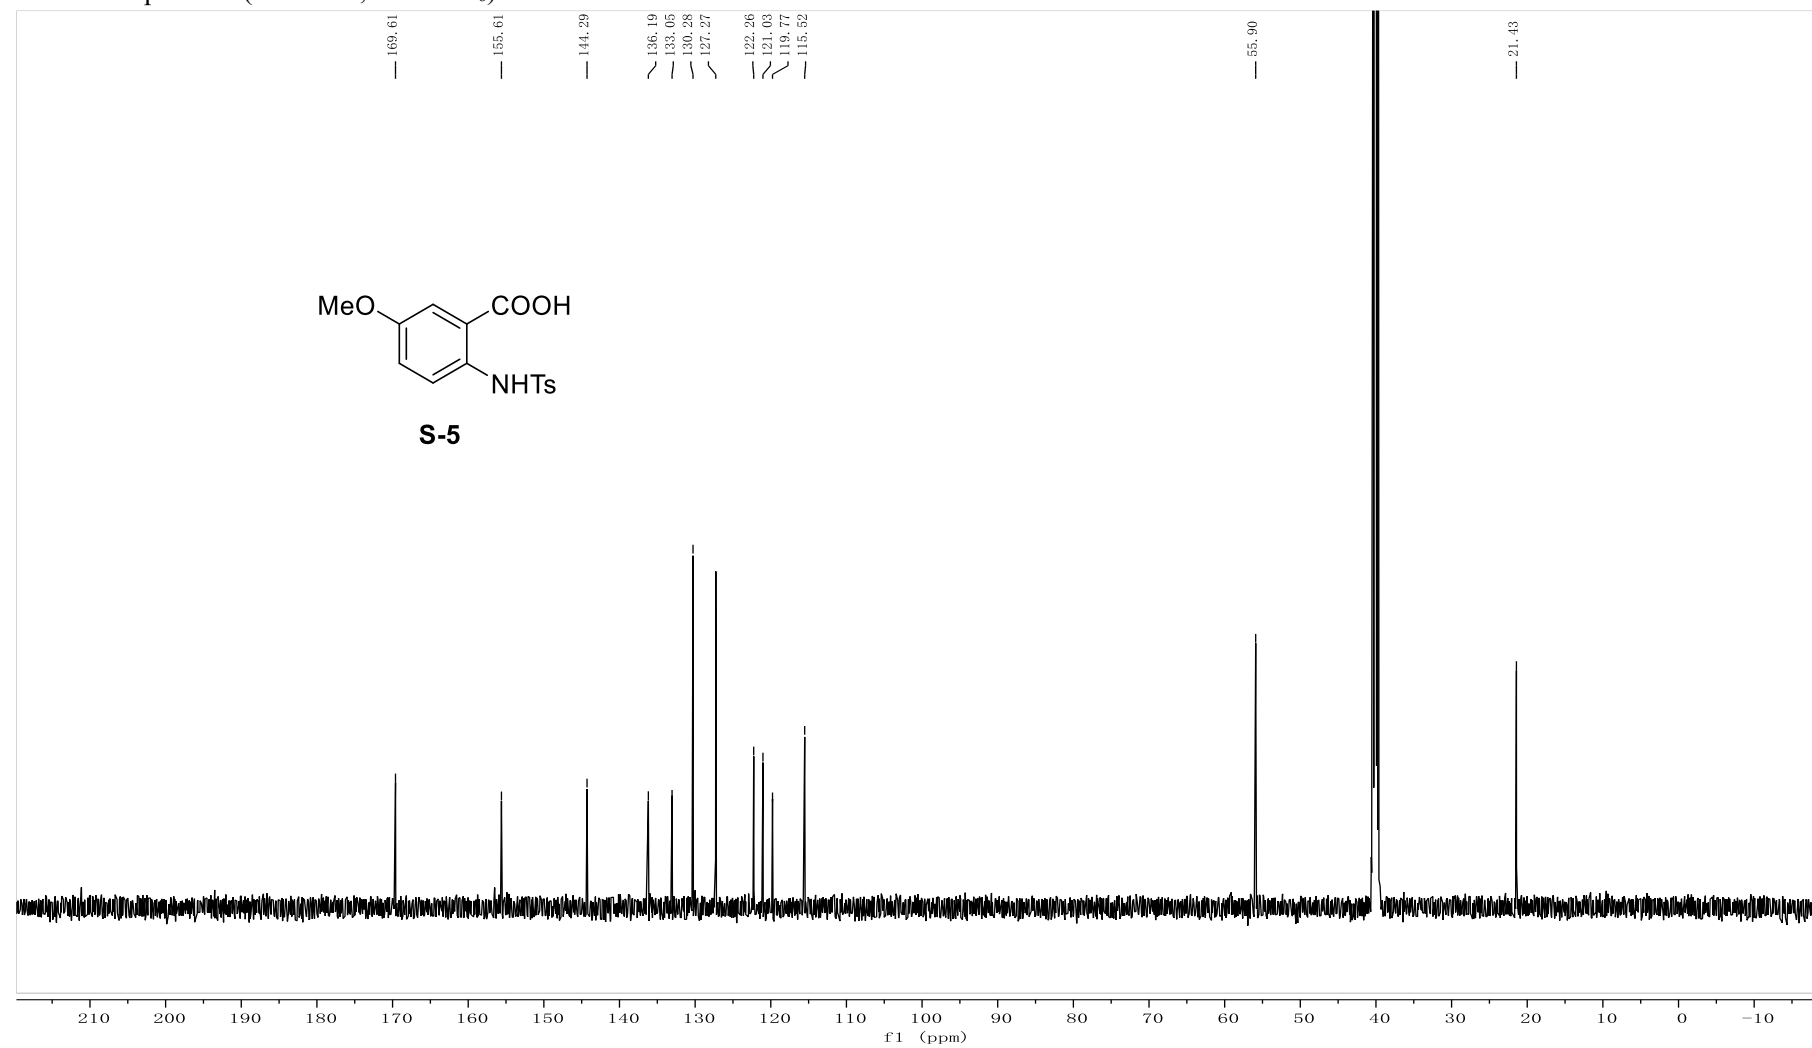

<sup>1</sup>H NMR-spectrum (400 MHz, CDCl<sub>3</sub>) of **4a**

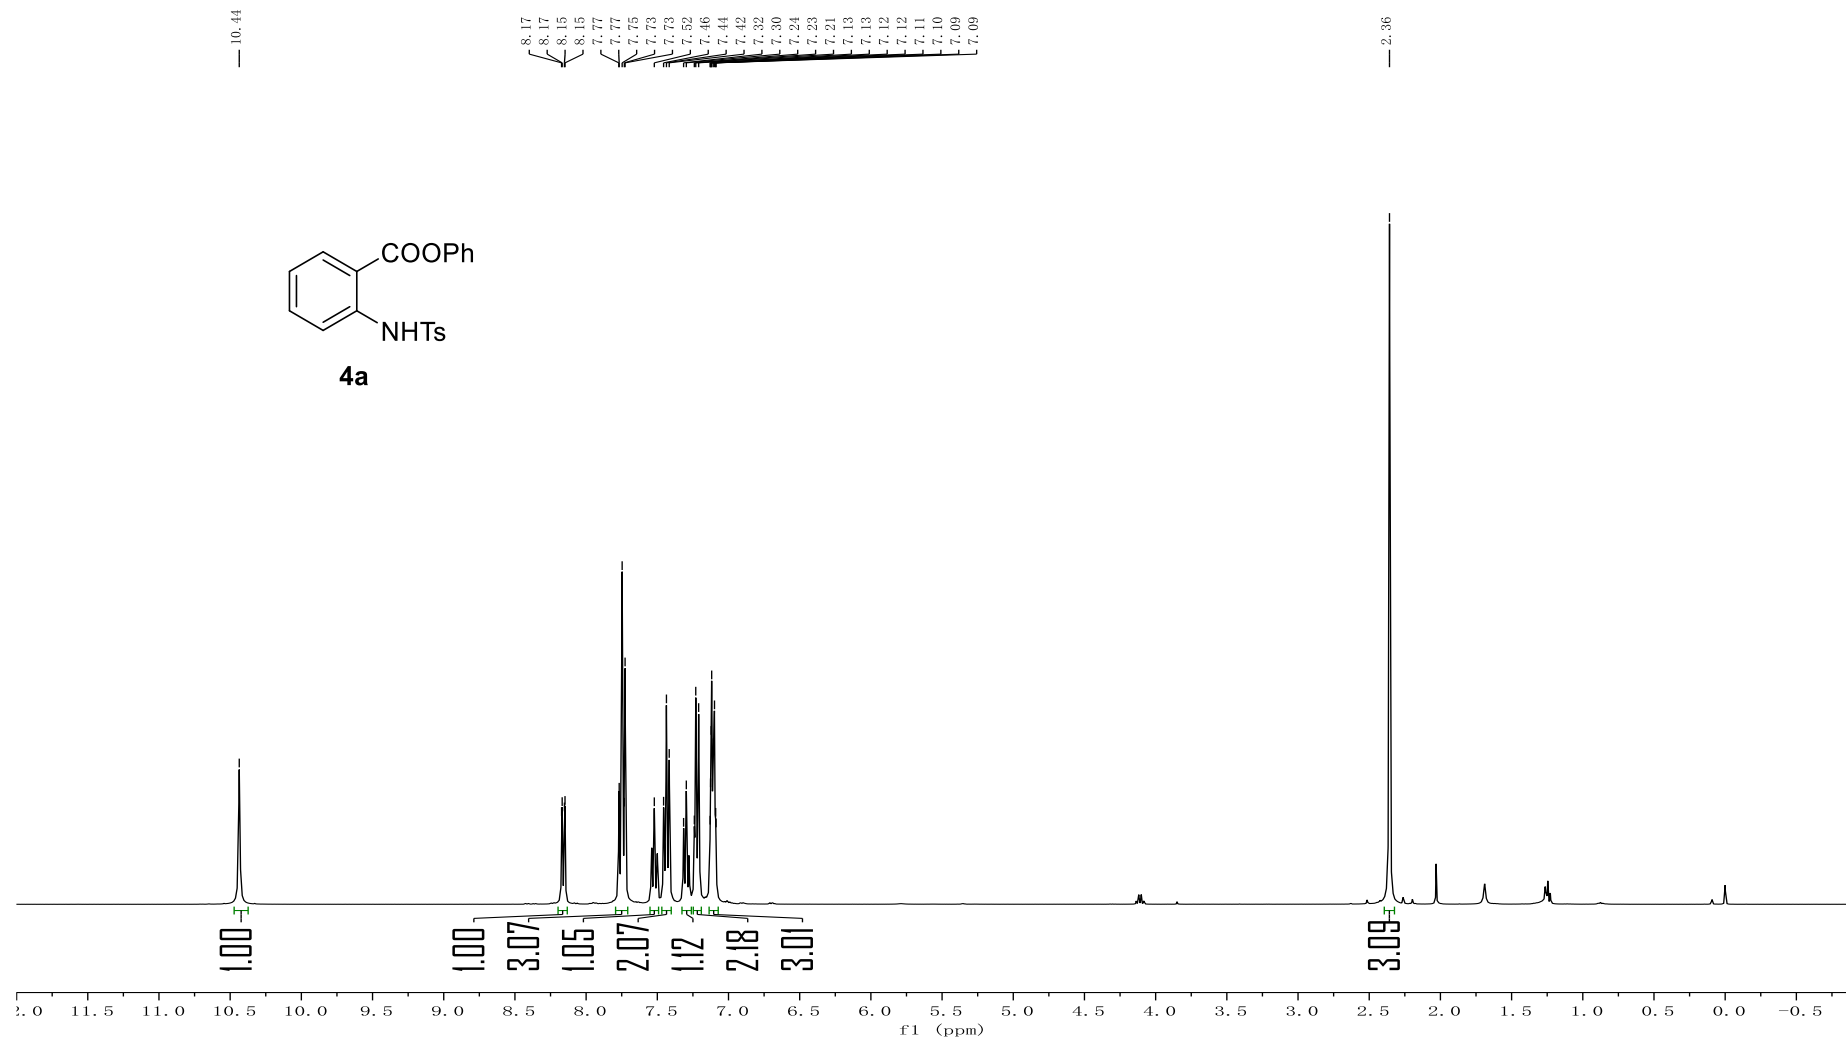



$^{13}\text{C}$  NMR-spectrum (101 MHz,  $\text{CDCl}_3$ ) of **4a**

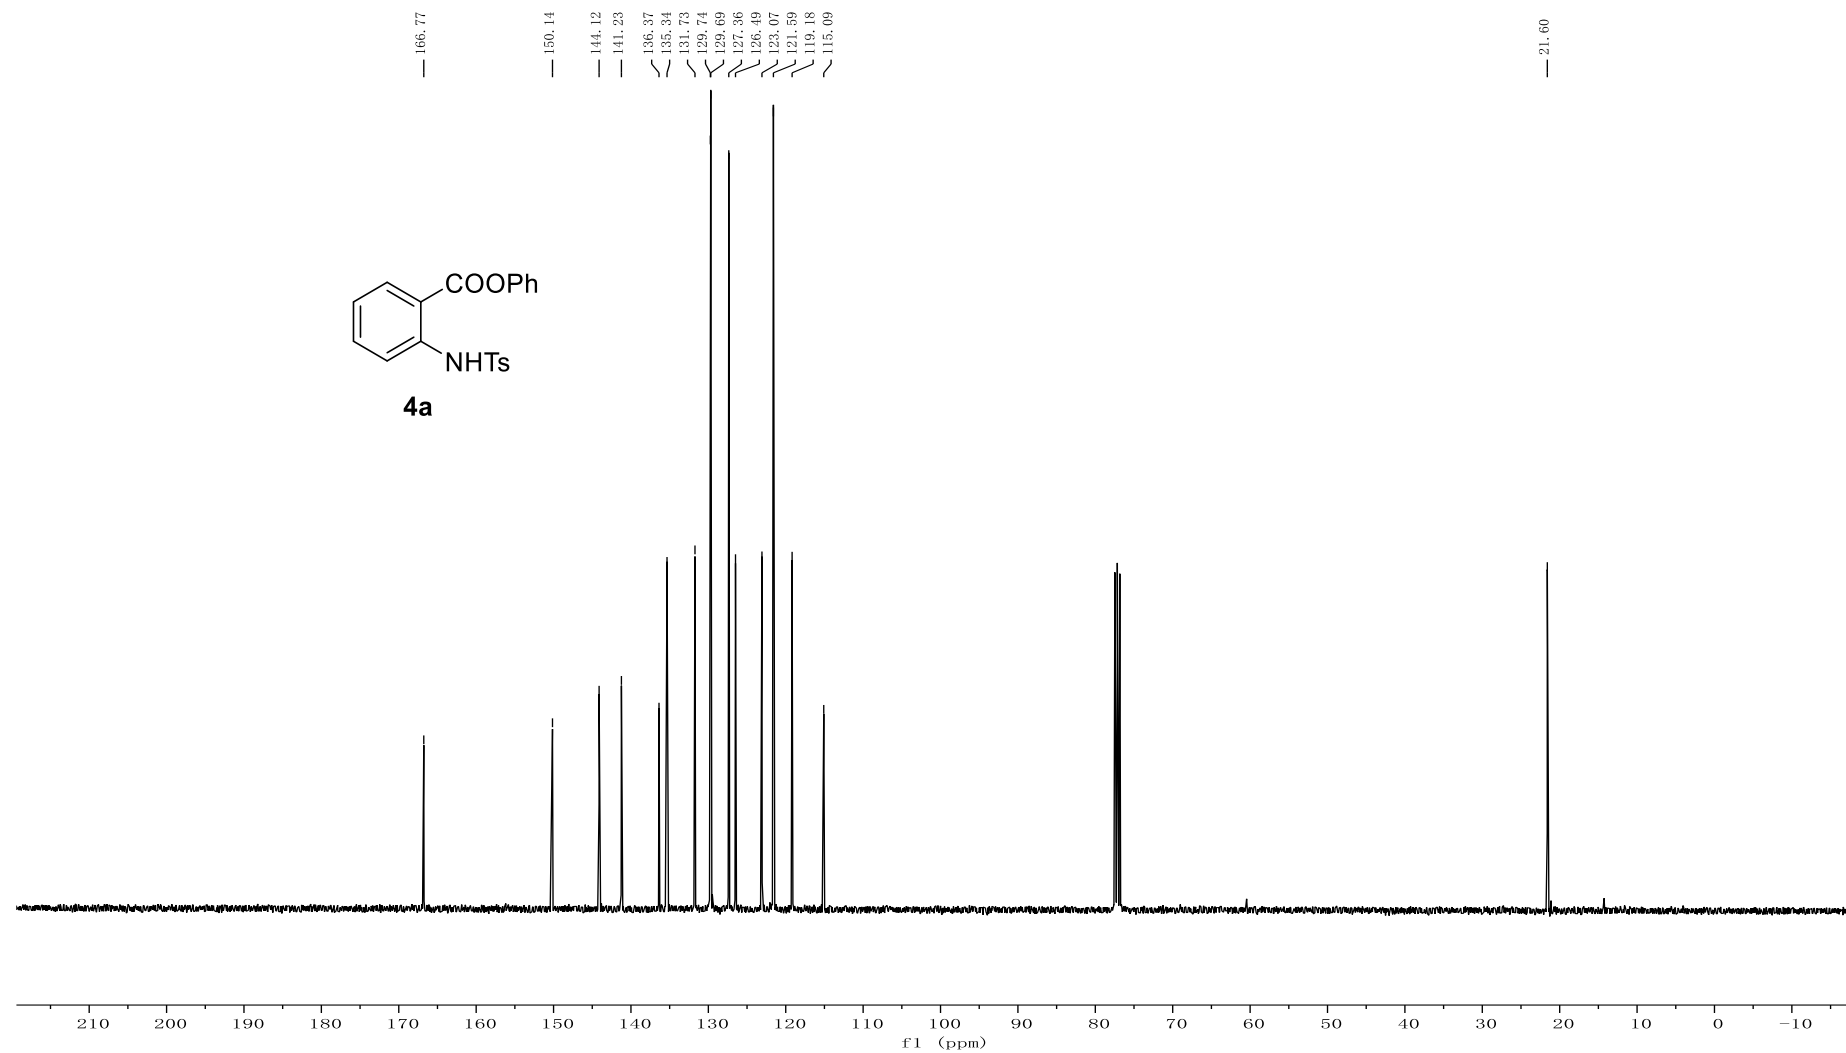

$^1\text{H}$  NMR-spectrum (400 MHz,  $\text{CDCl}_3$ ) of **4c**

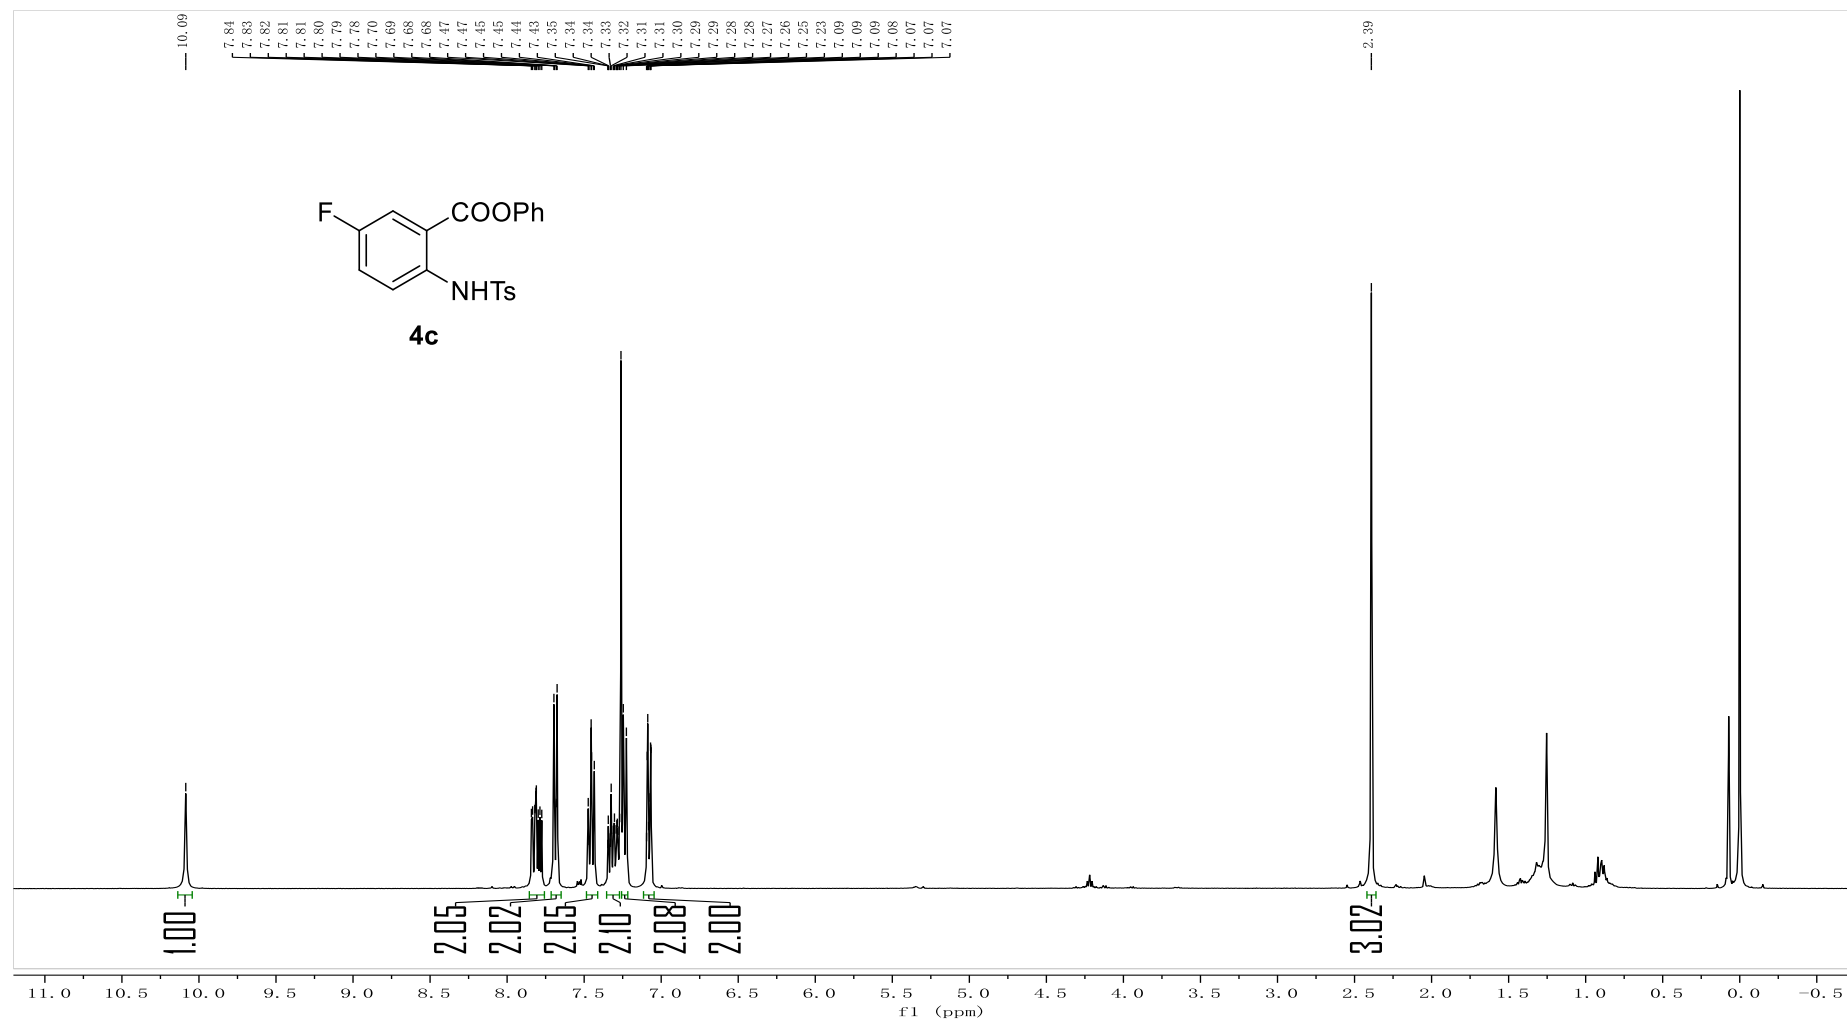

$^{13}\text{C}$  NMR-spectrum (101 MHz,  $\text{CDCl}_3$ ) of **4c**

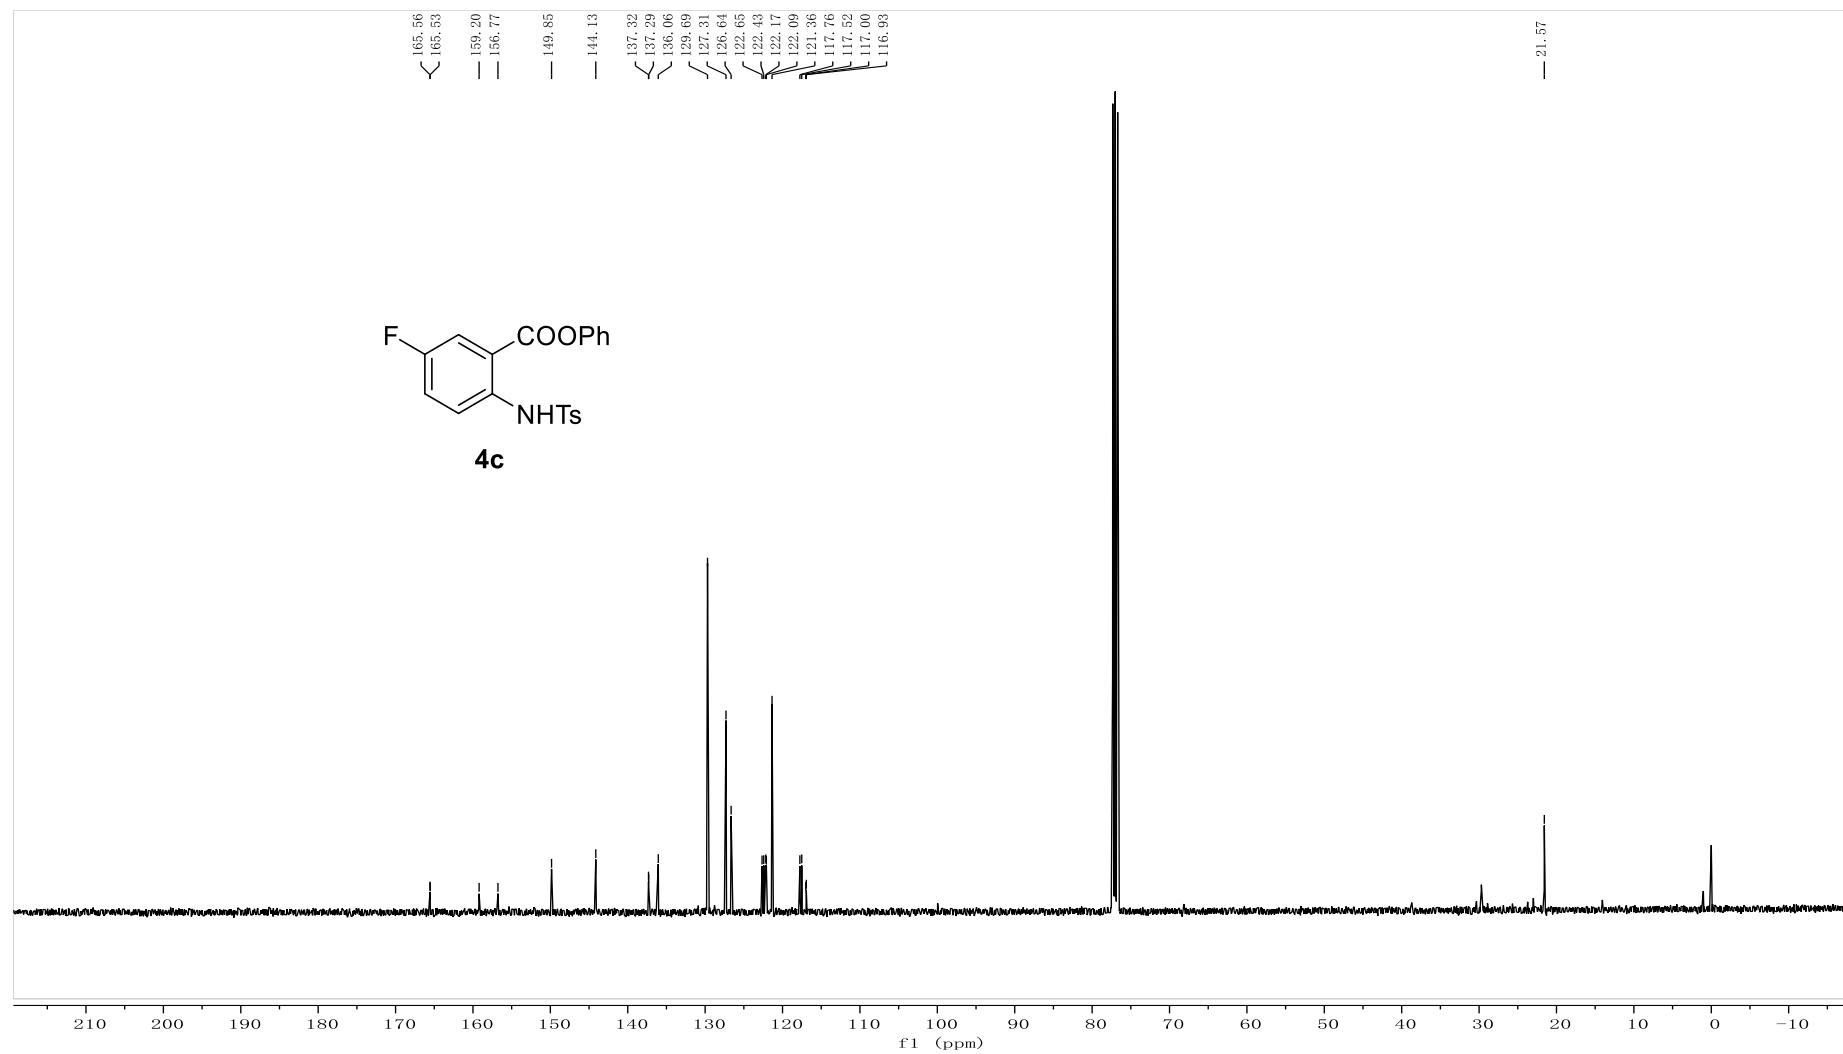

$^{19}\text{F}$  NMR-spectrum (376 MHz,  $\text{CDCl}_3$ ) of **4c**

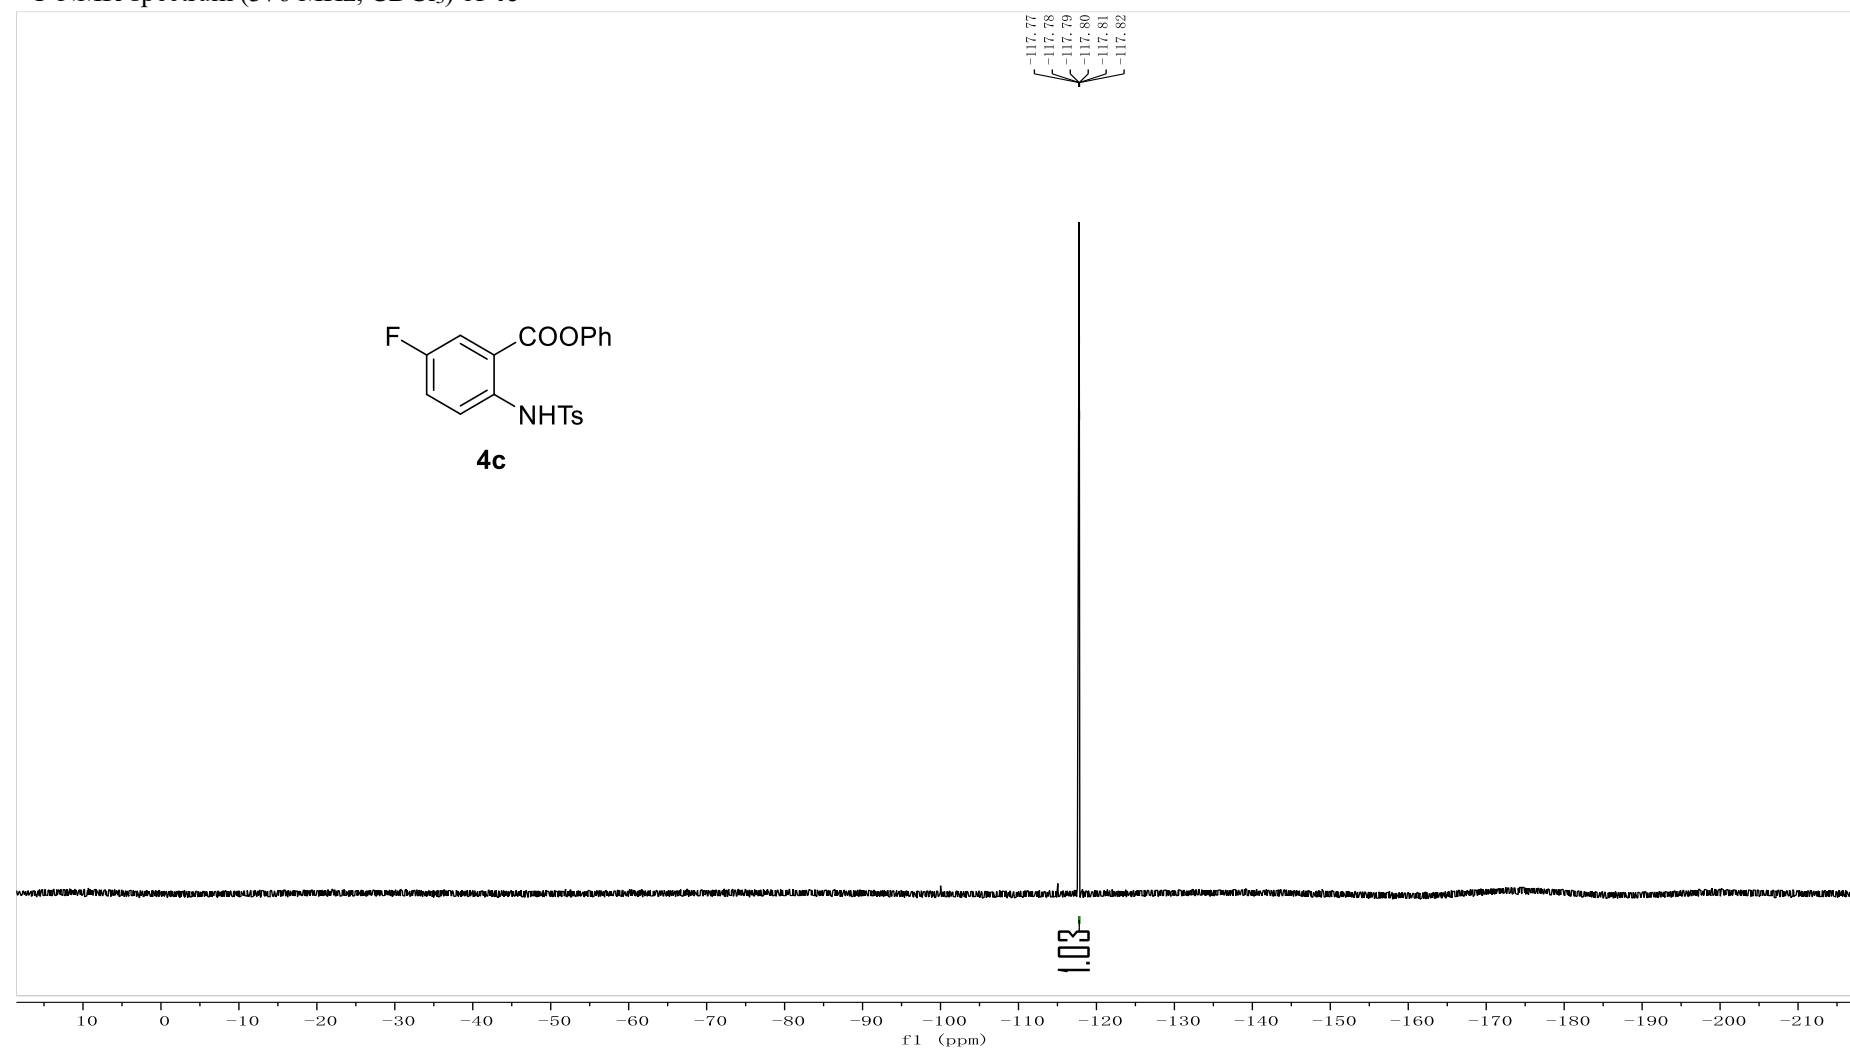

<sup>1</sup>H NMR-spectrum (400 MHz, CDCl<sub>3</sub>) of **4b**

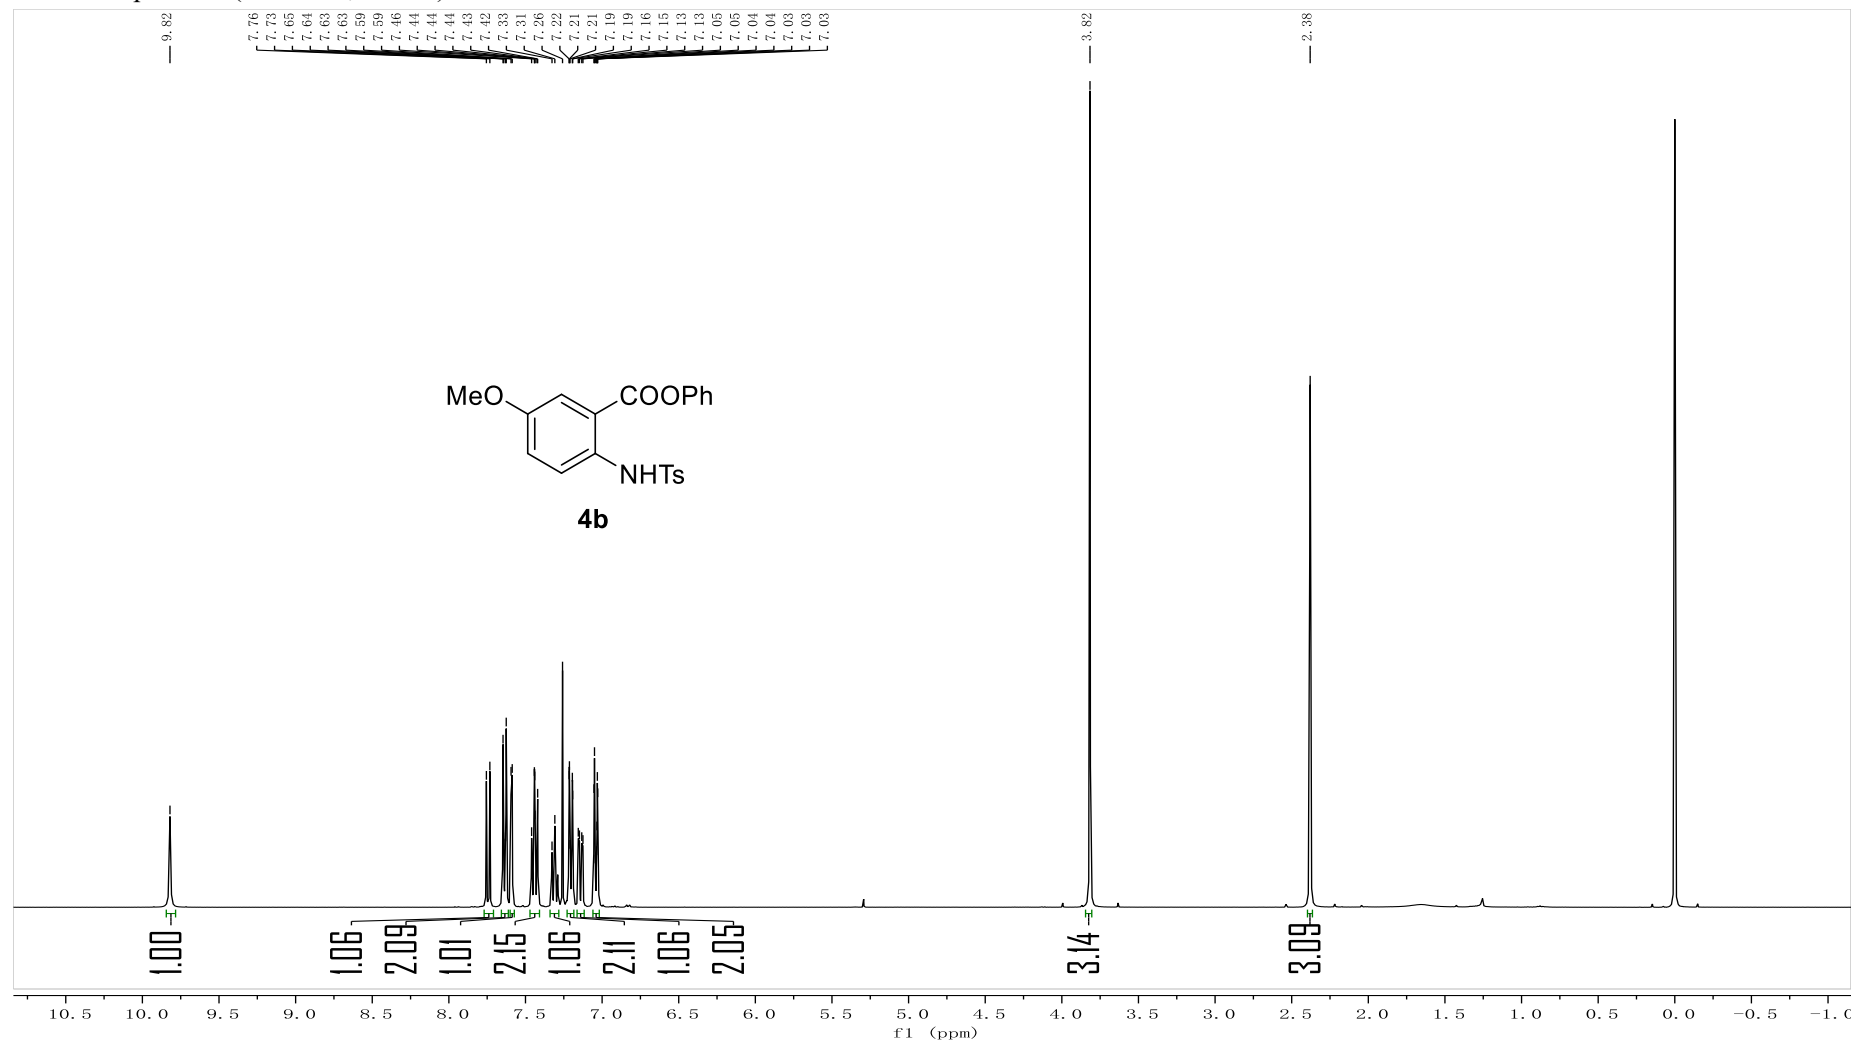

$^{13}\text{C}$  NMR-spectrum (101 MHz,  $\text{CDCl}_3$ ) of **4b**

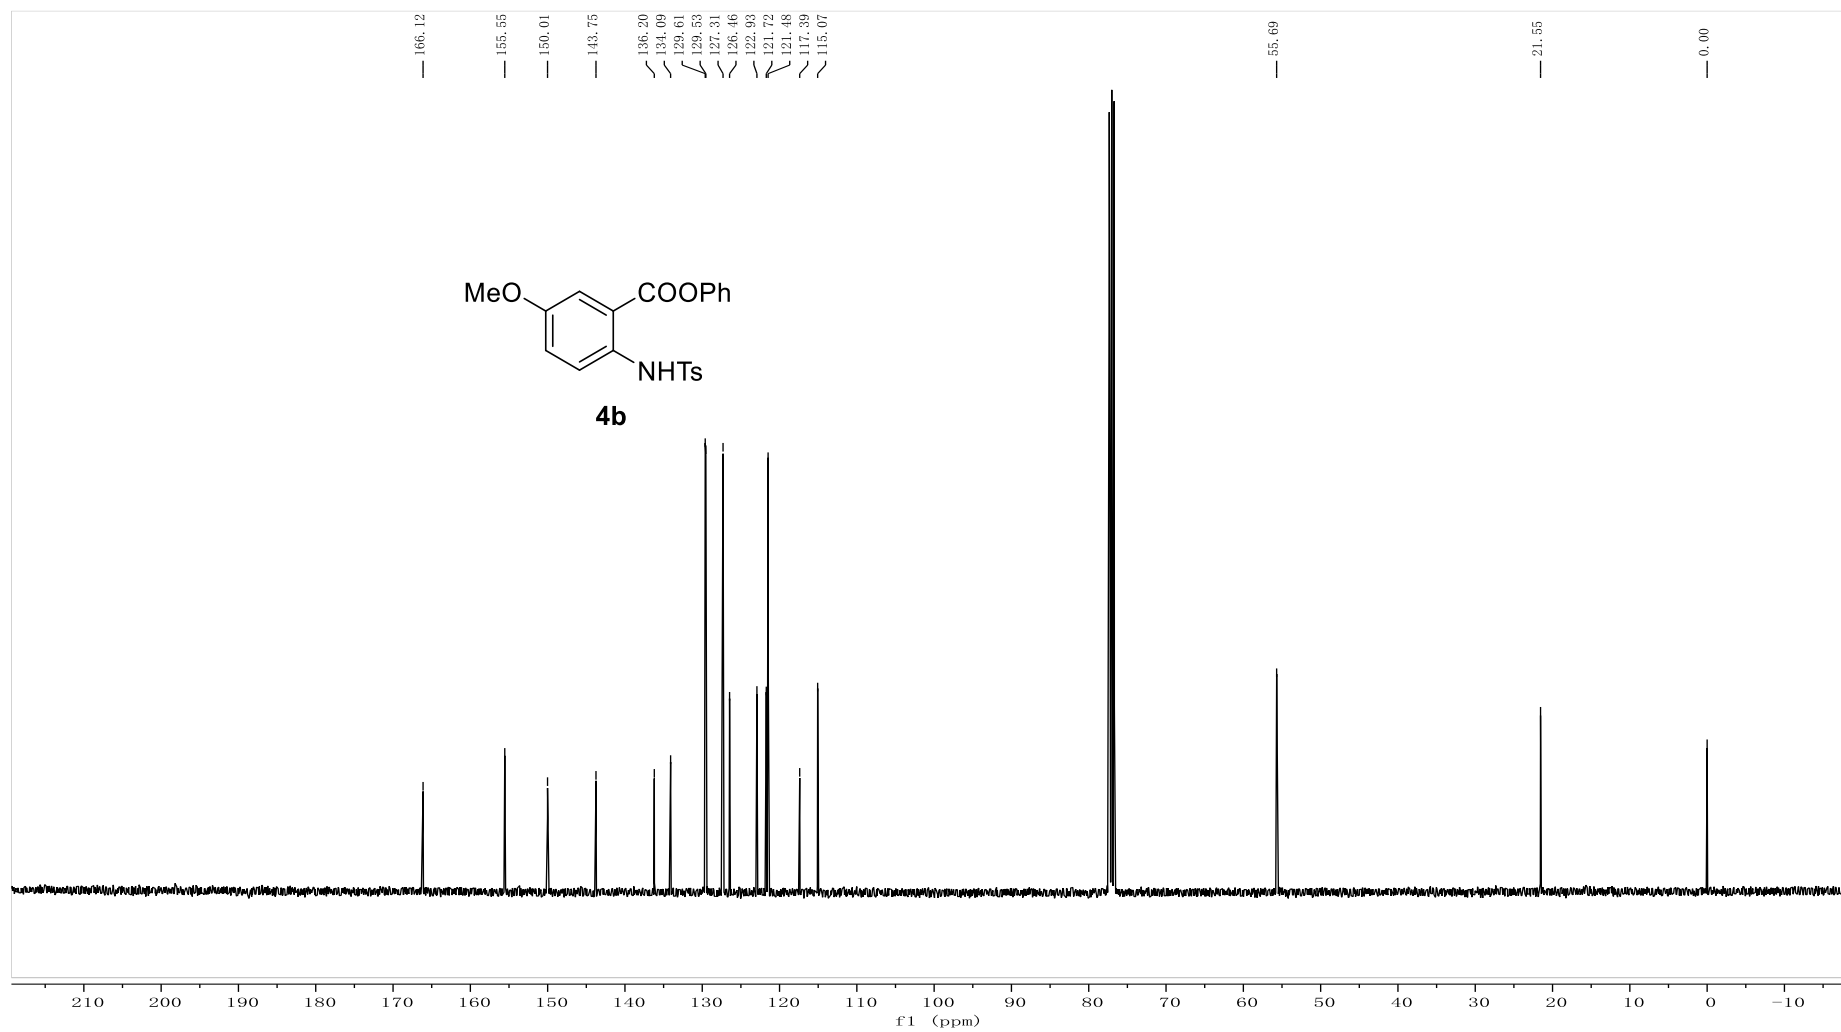

<sup>1</sup>H NMR-spectrum (400 MHz, CDCl<sub>3</sub>) of **4d**

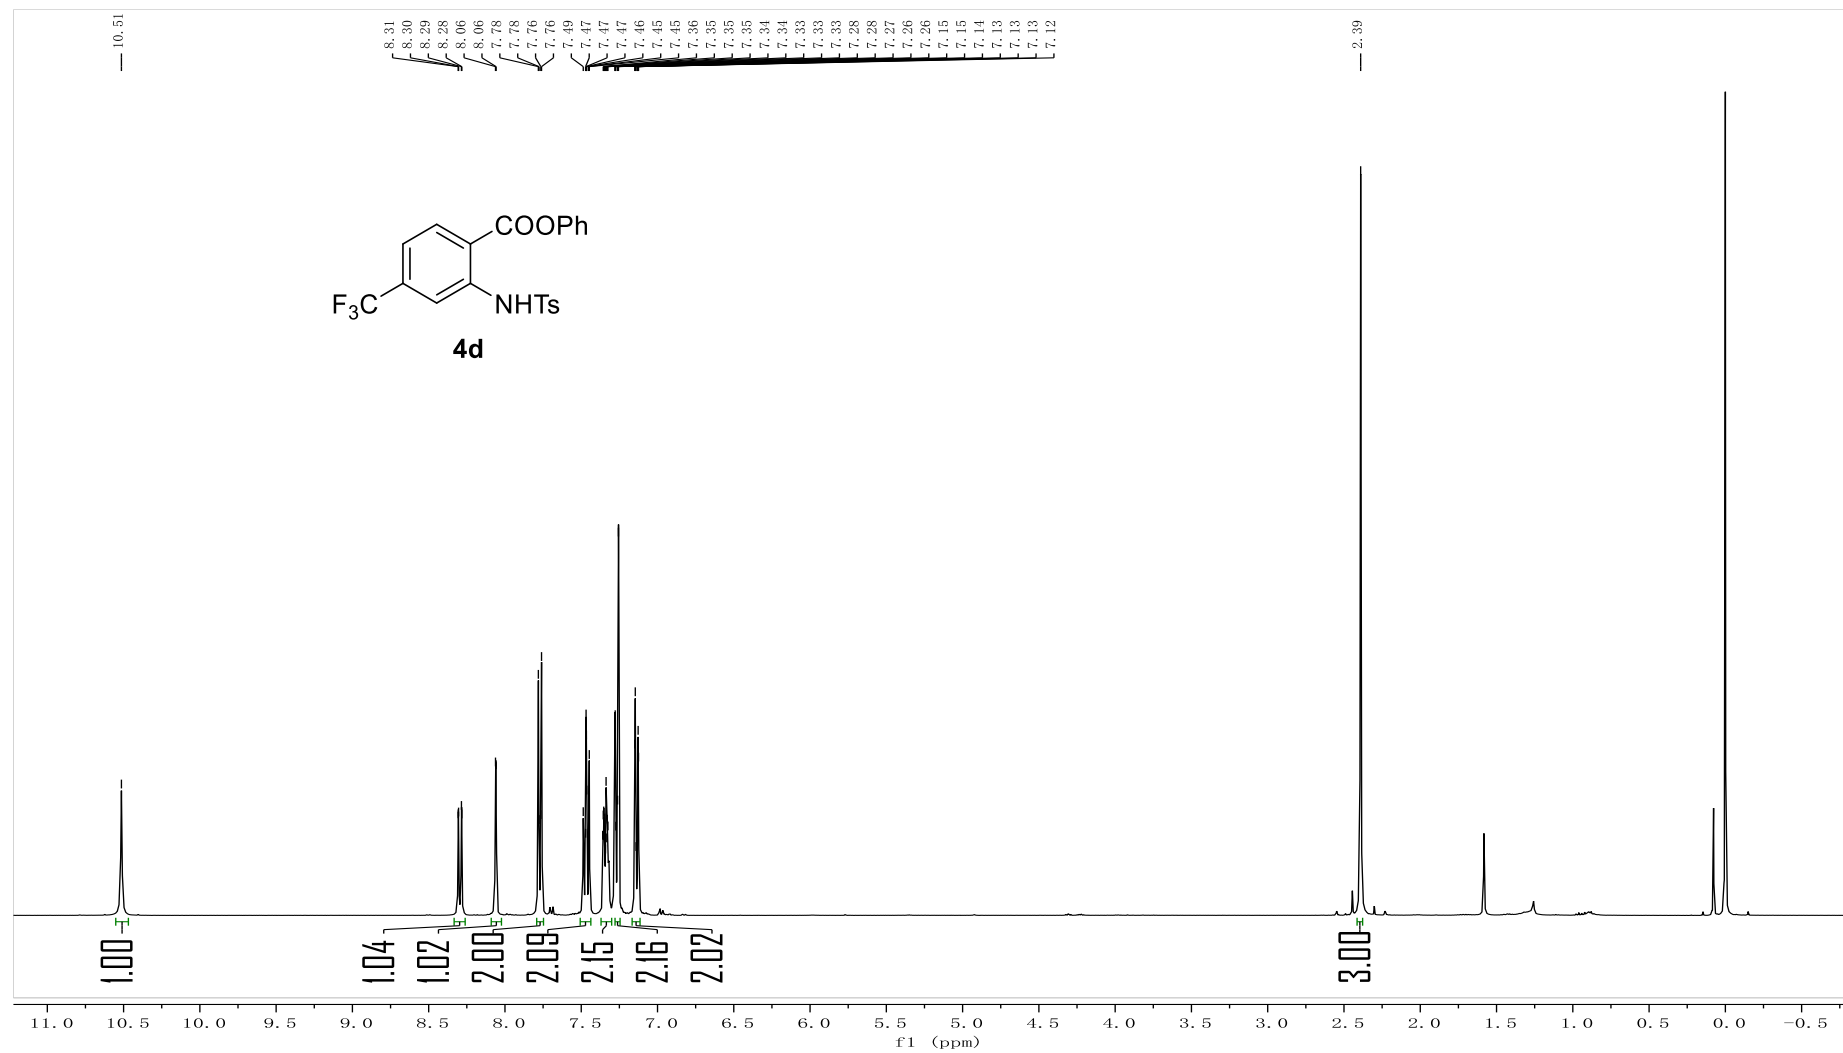

$^{13}\text{C}$  NMR-spectrum (101 MHz,  $\text{CDCl}_3$ ) of **4d**

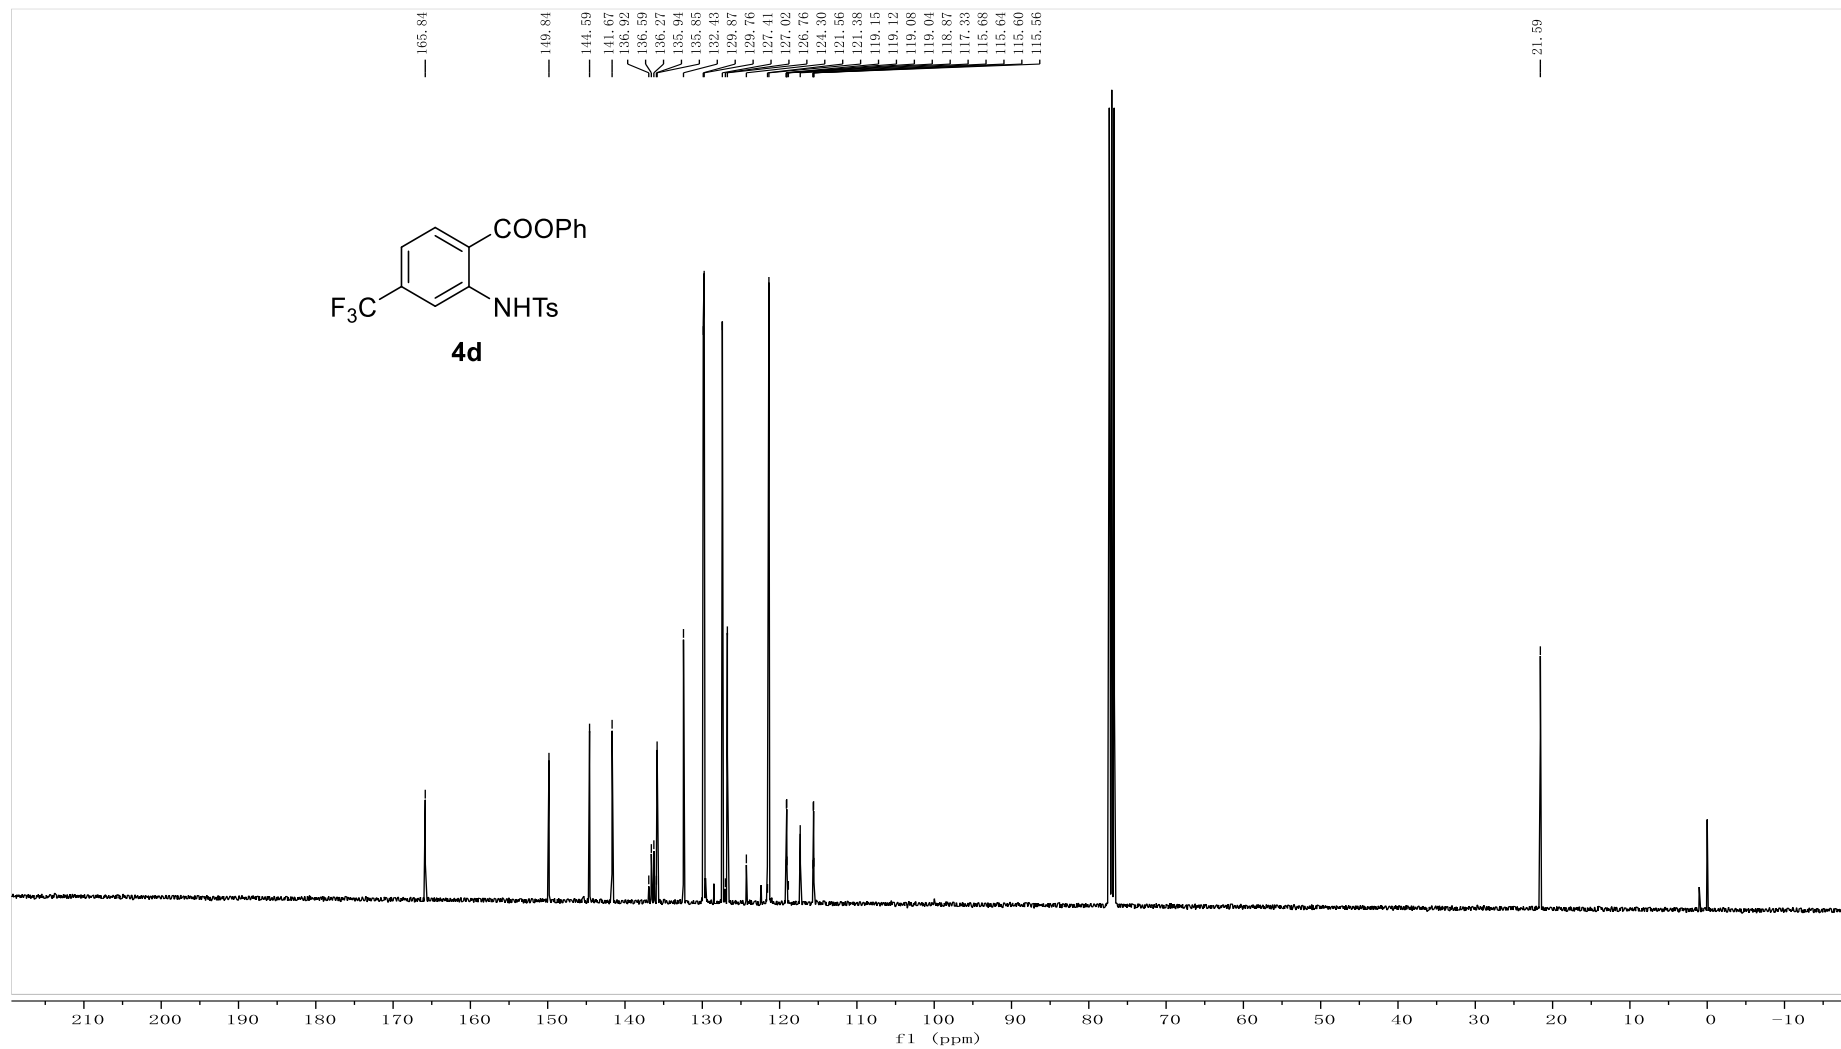



$^{19}\text{F}$  NMR-spectrum (376 MHz,  $\text{CDCl}_3$ ) of **4d**

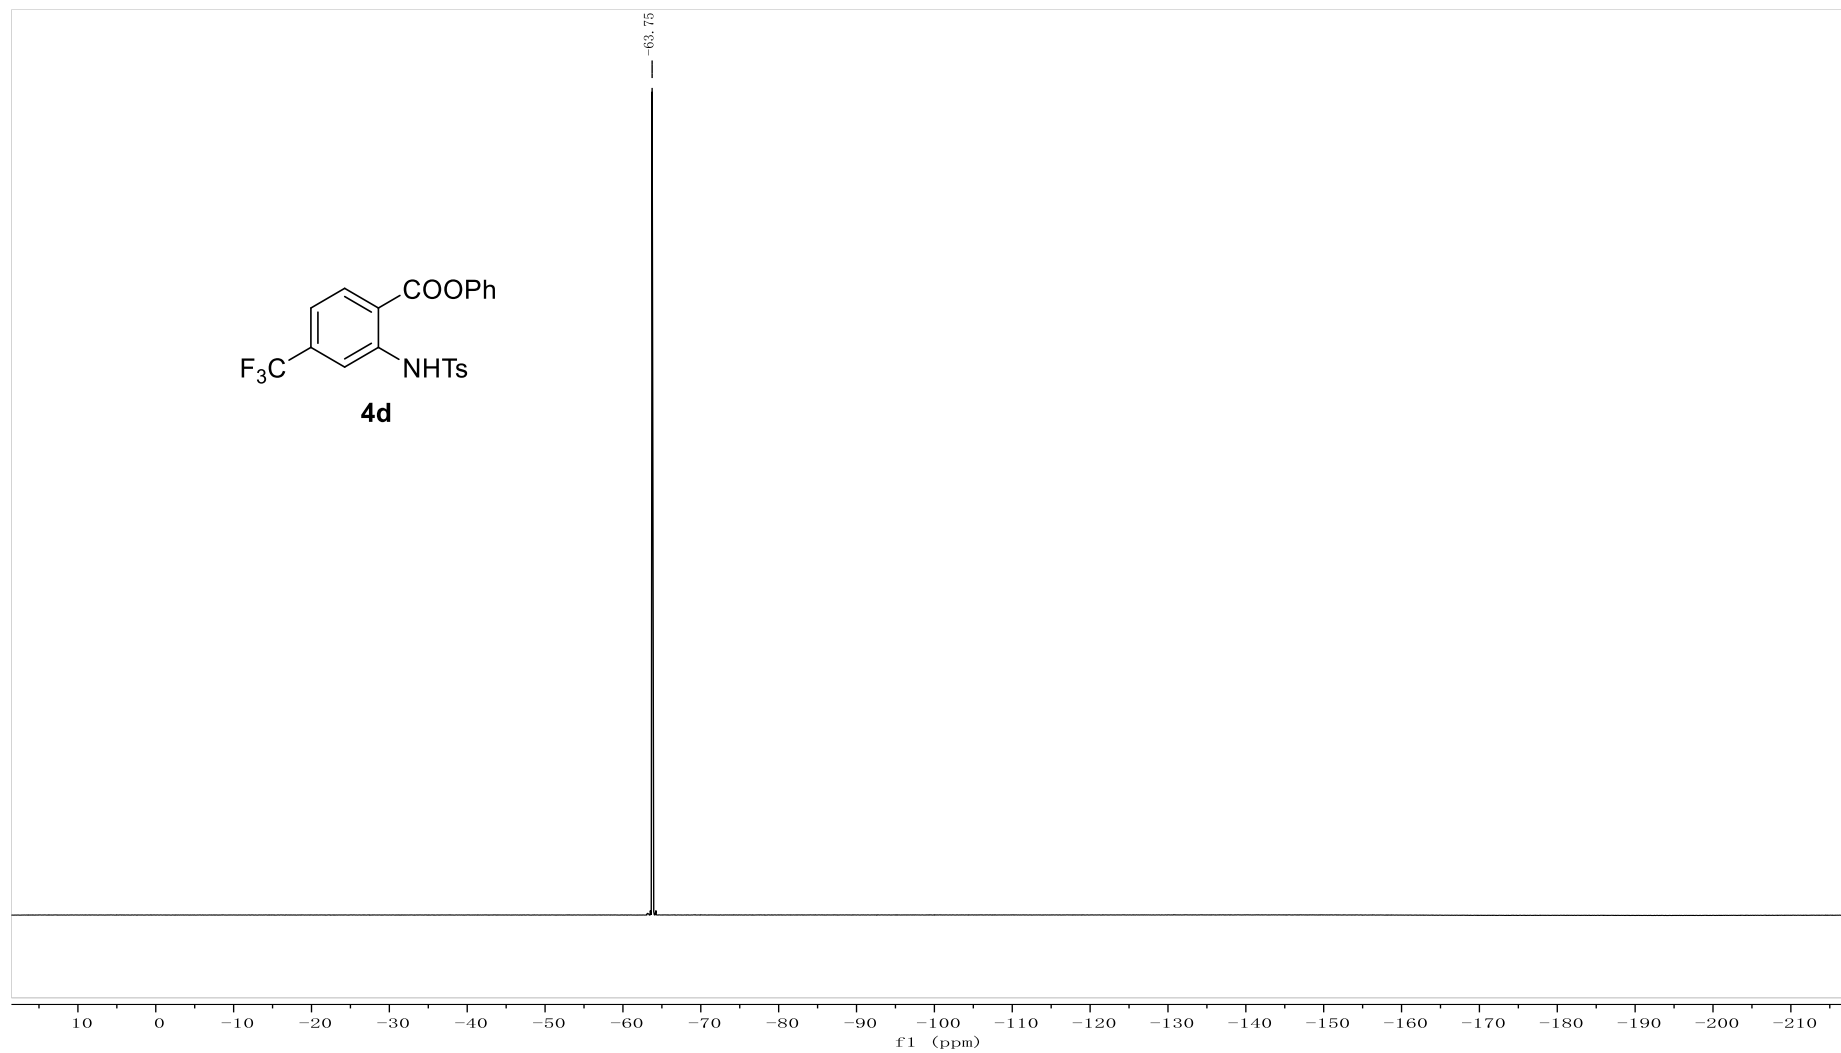

$^1\text{H}$  NMR-spectrum (500 MHz,  $\text{CDCl}_3$ ) of **2m**

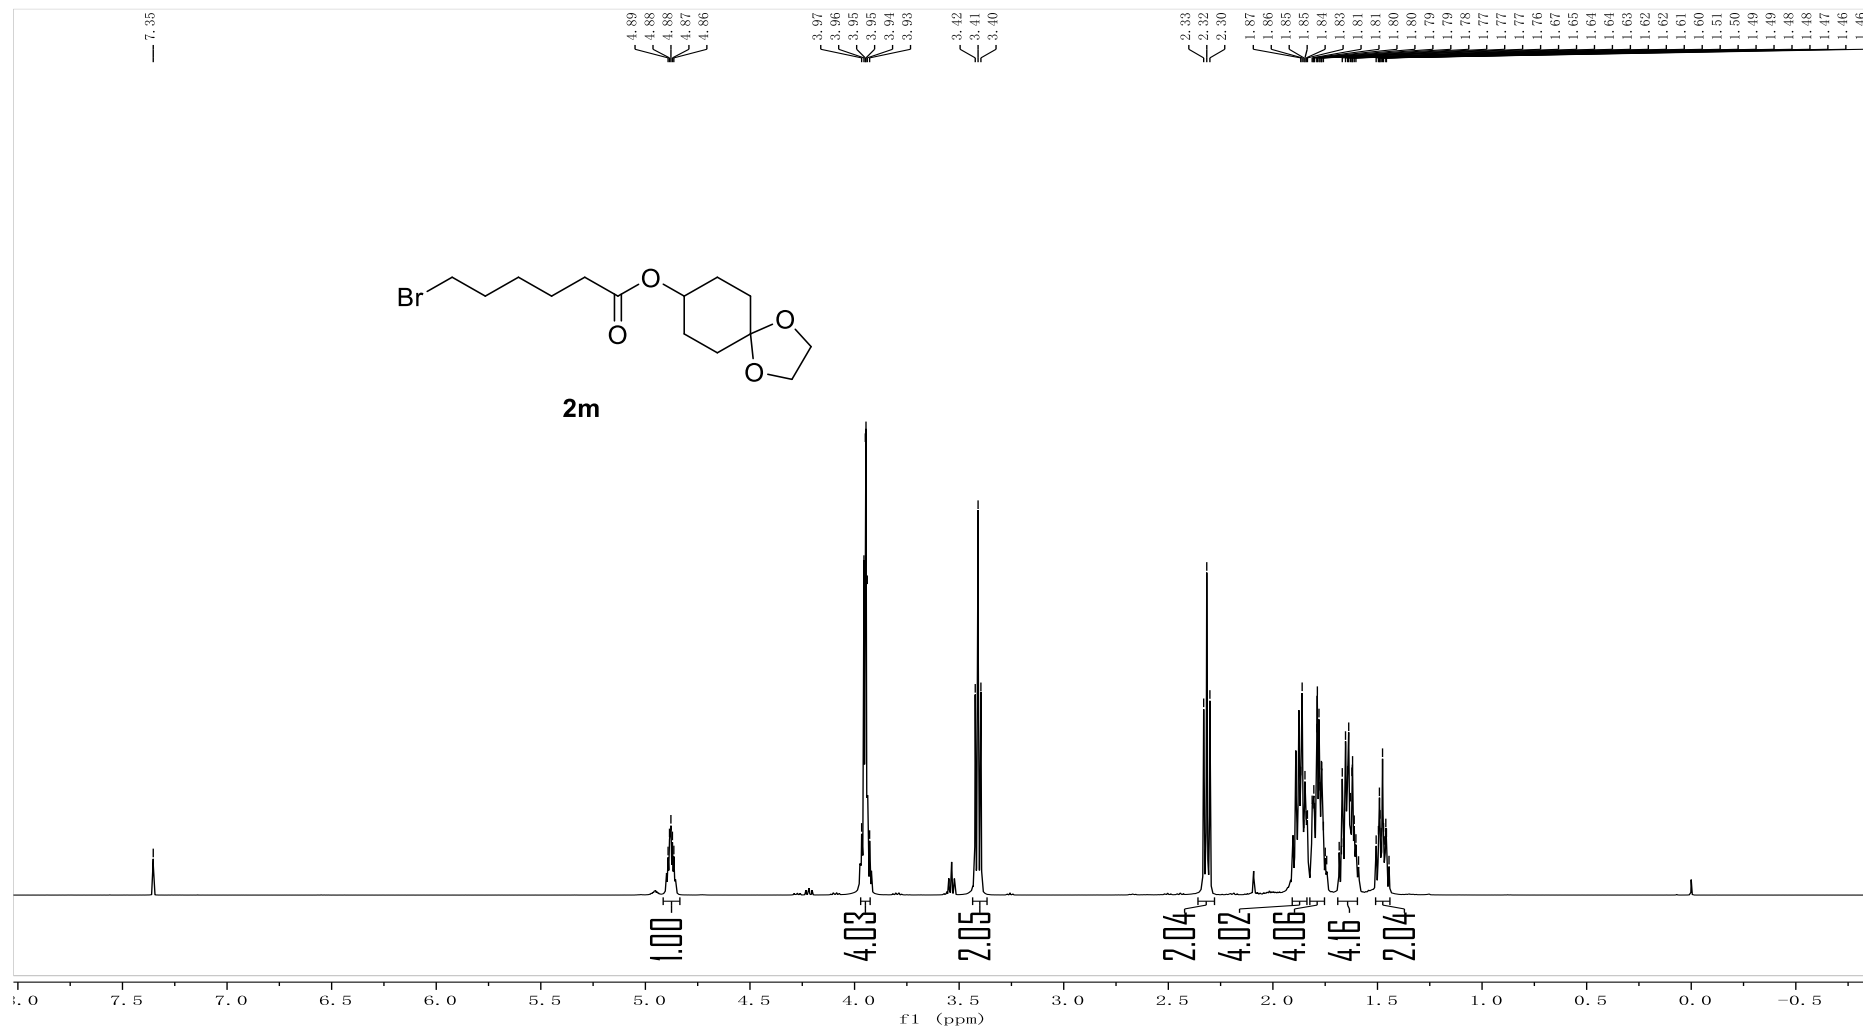

$^{13}\text{C}$  NMR-spectrum (126 MHz,  $\text{CDCl}_3$ ) of **2m**

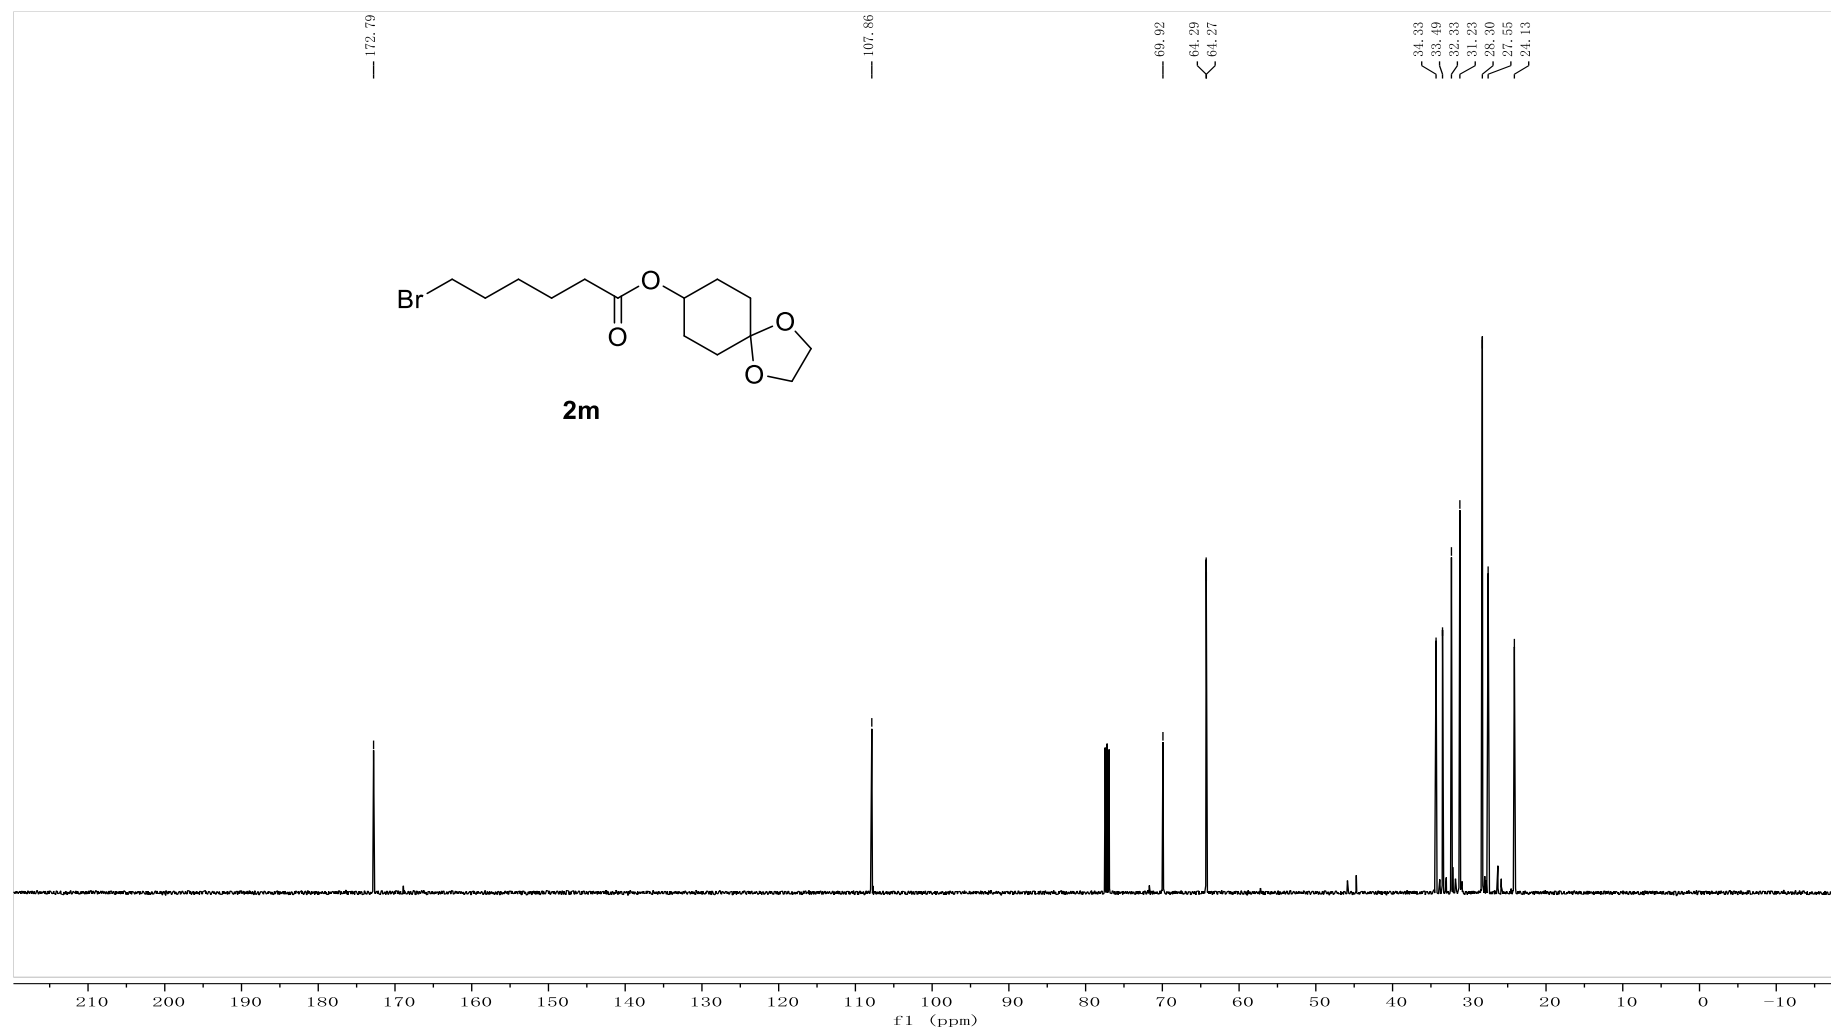

$^1\text{H}$  NMR-spectrum (500 MHz,  $\text{CDCl}_3$ ) of **2r**

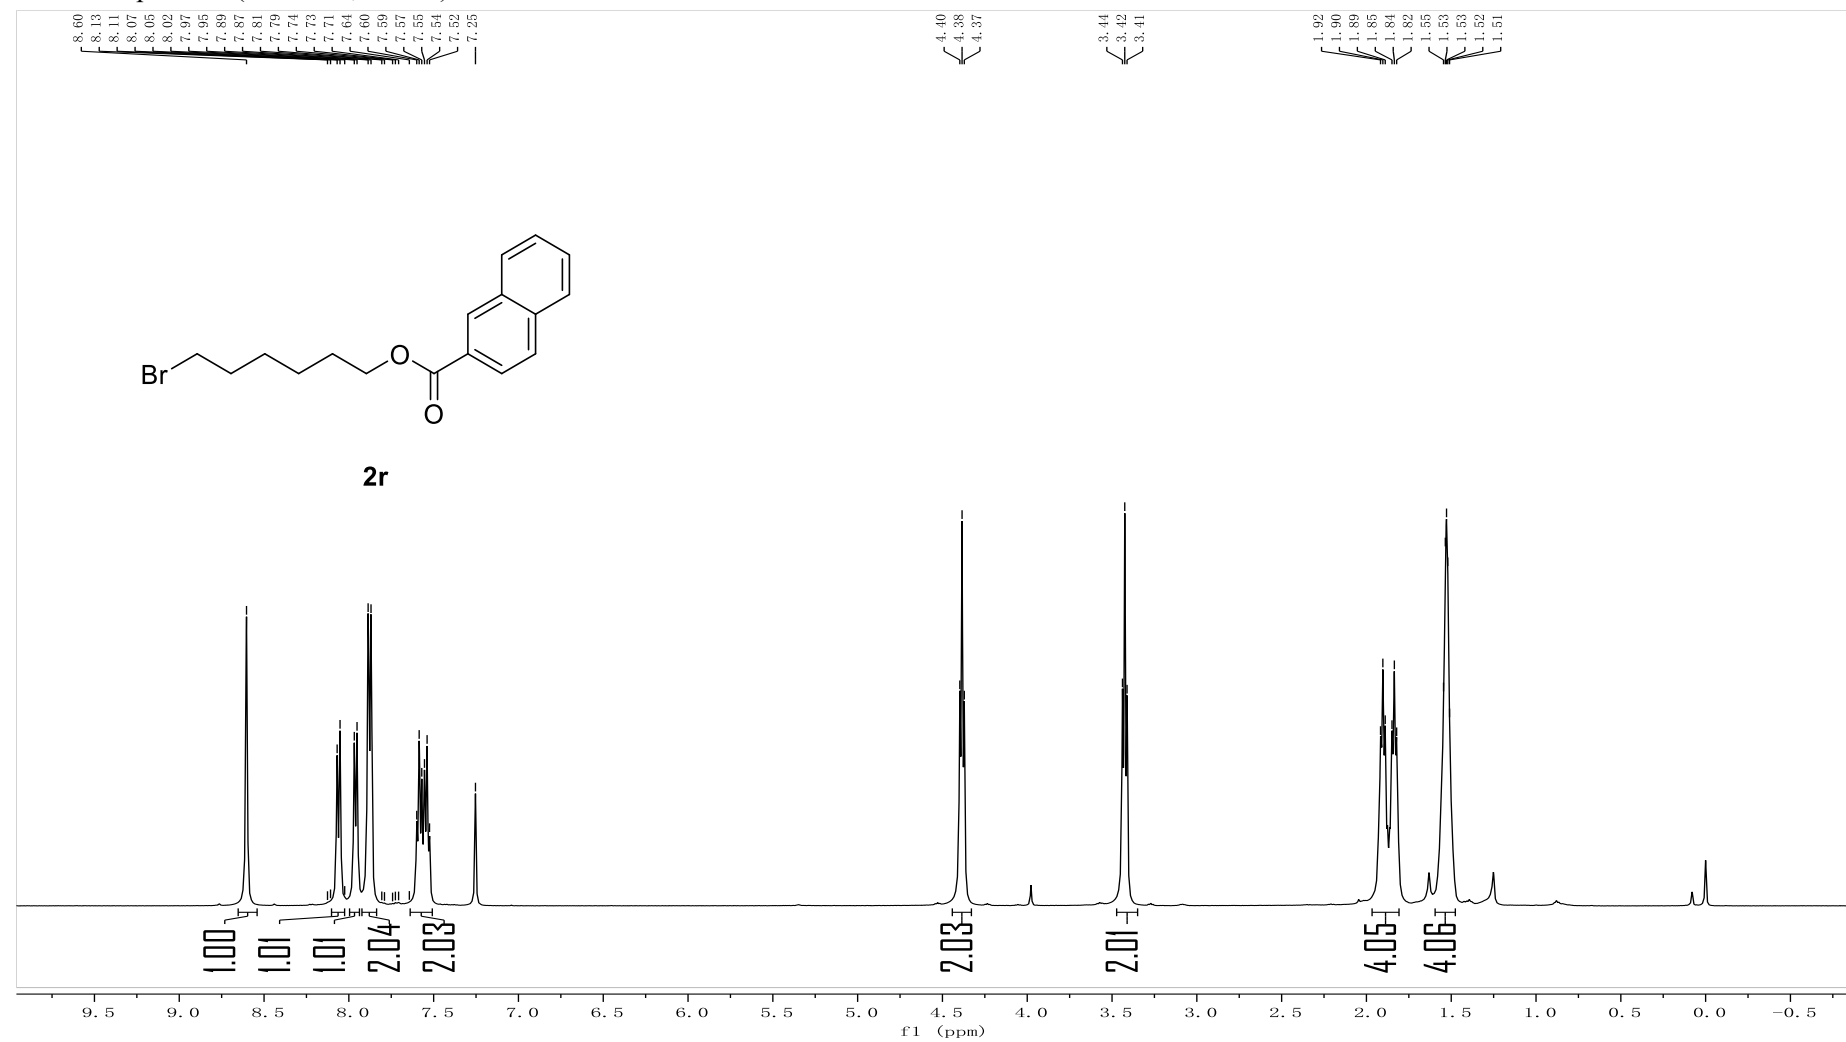

$^{13}\text{C}$  NMR-spectrum (101 MHz,  $\text{CDCl}_3$ ) of **2r**

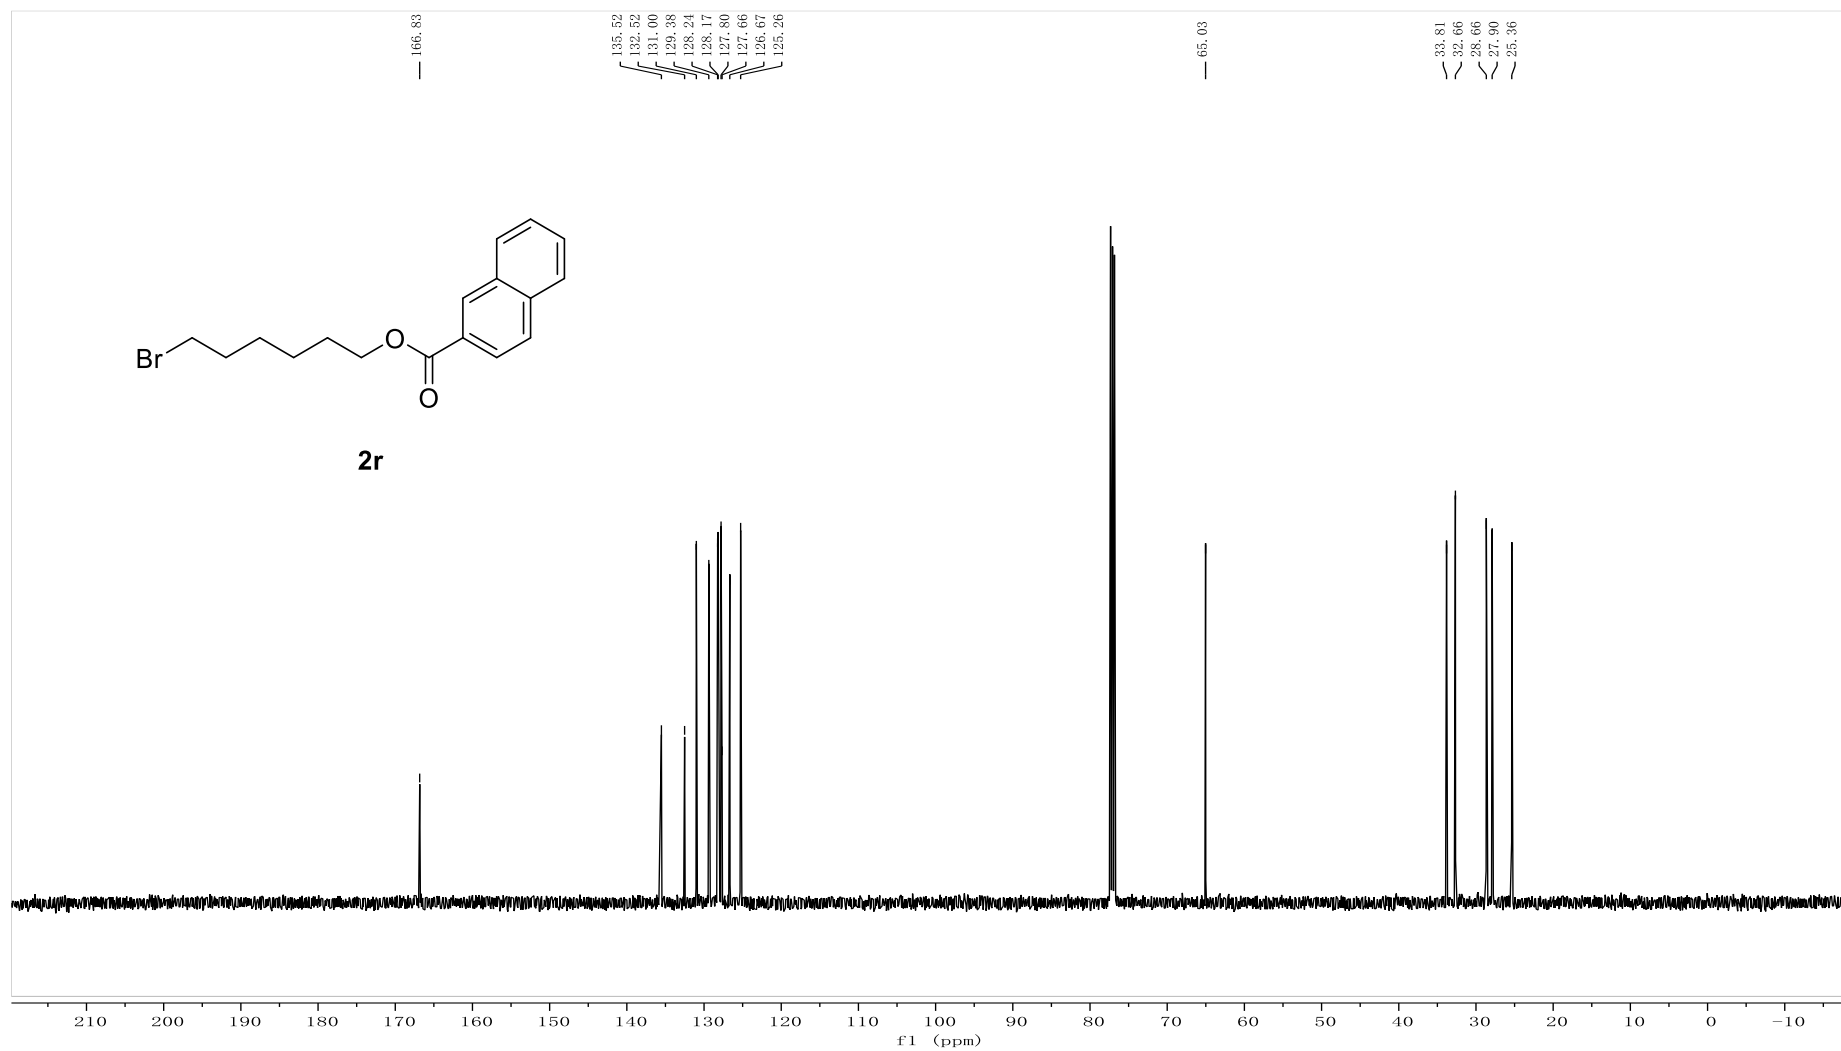

$^1\text{H}$  NMR-spectrum (400 MHz,  $\text{CDCl}_3$ ) of **3aa**

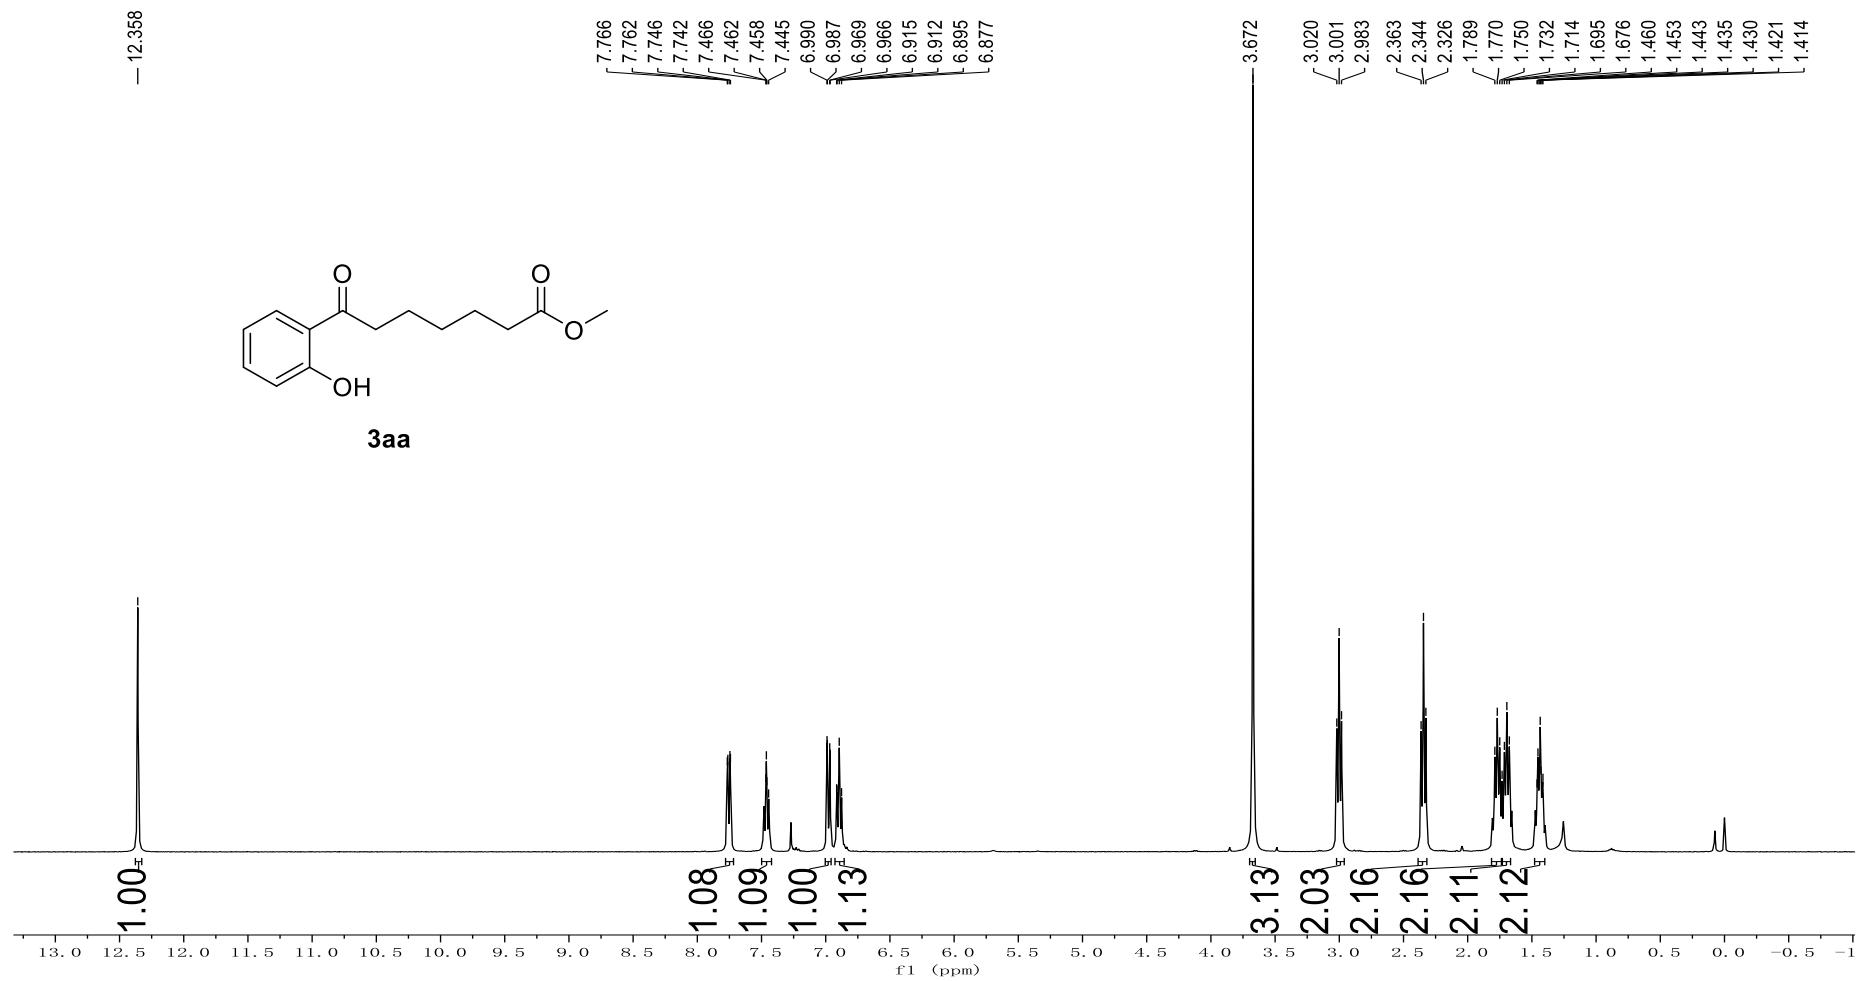

$^{13}\text{C}$  NMR-spectrum (101 MHz,  $\text{CDCl}_3$ ) of **3aa**

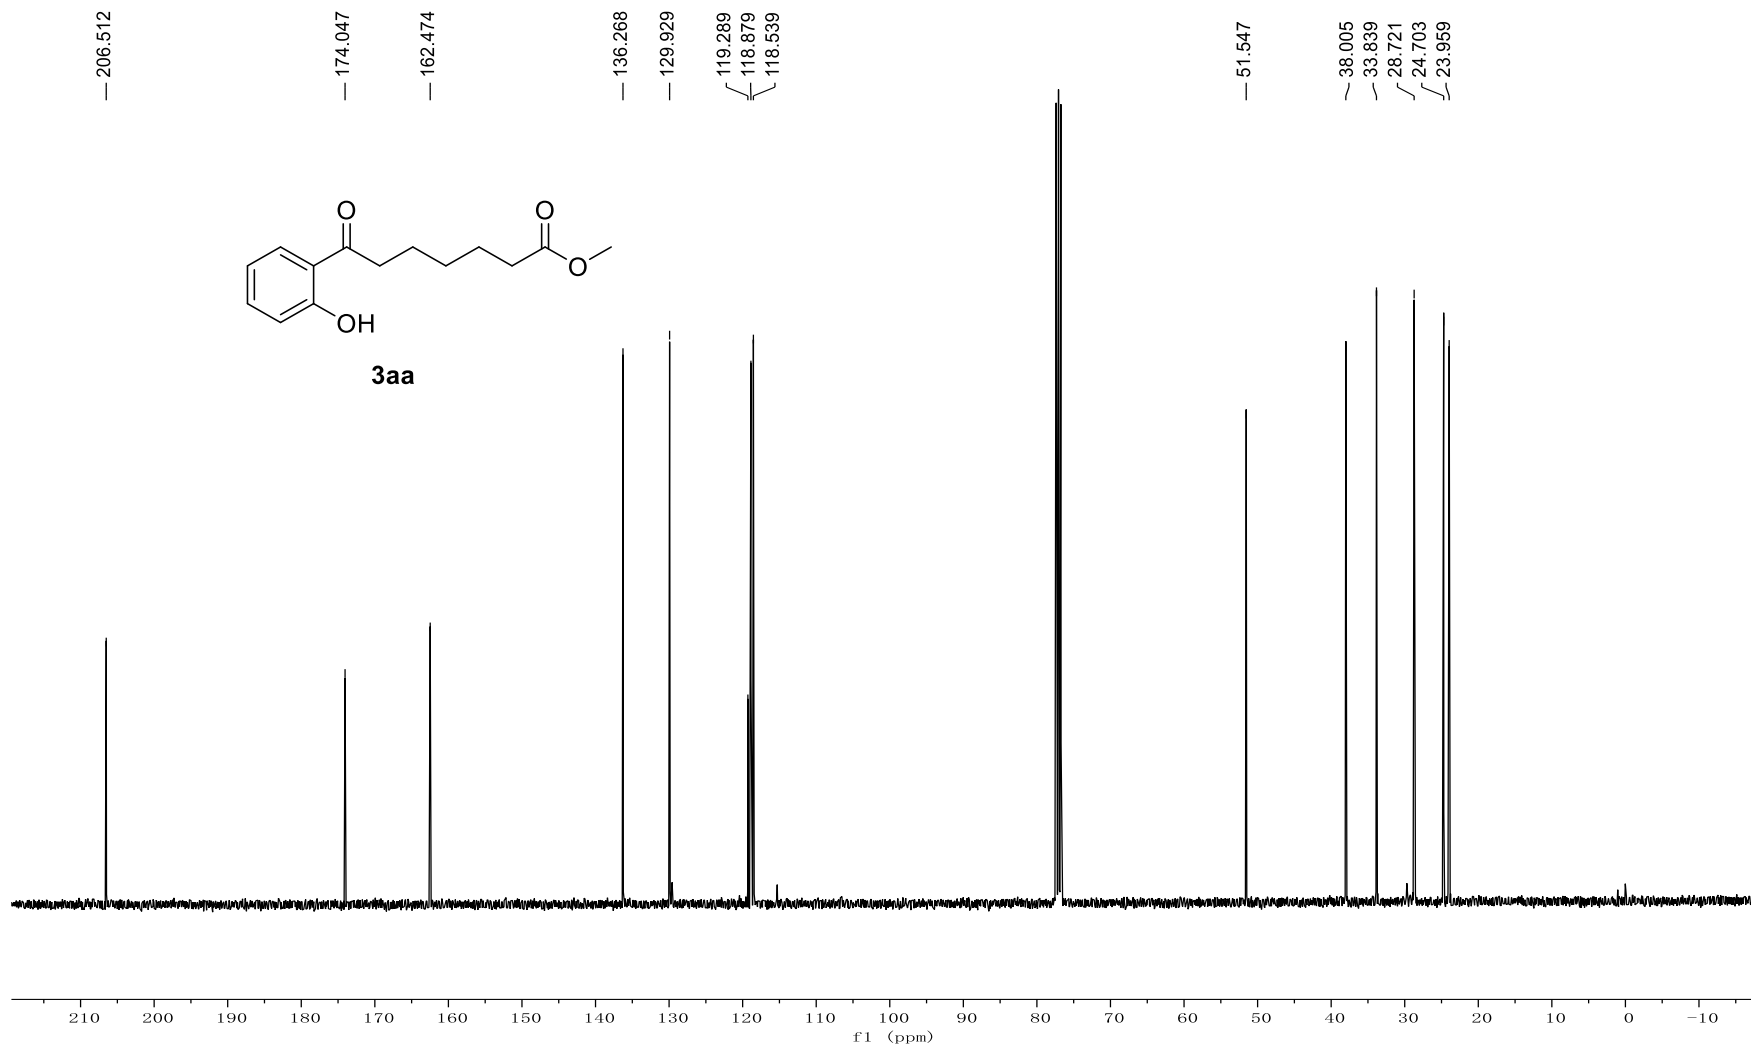

$^1\text{H}$  NMR-spectrum (500 MHz,  $\text{CDCl}_3$ ) of **3ab**

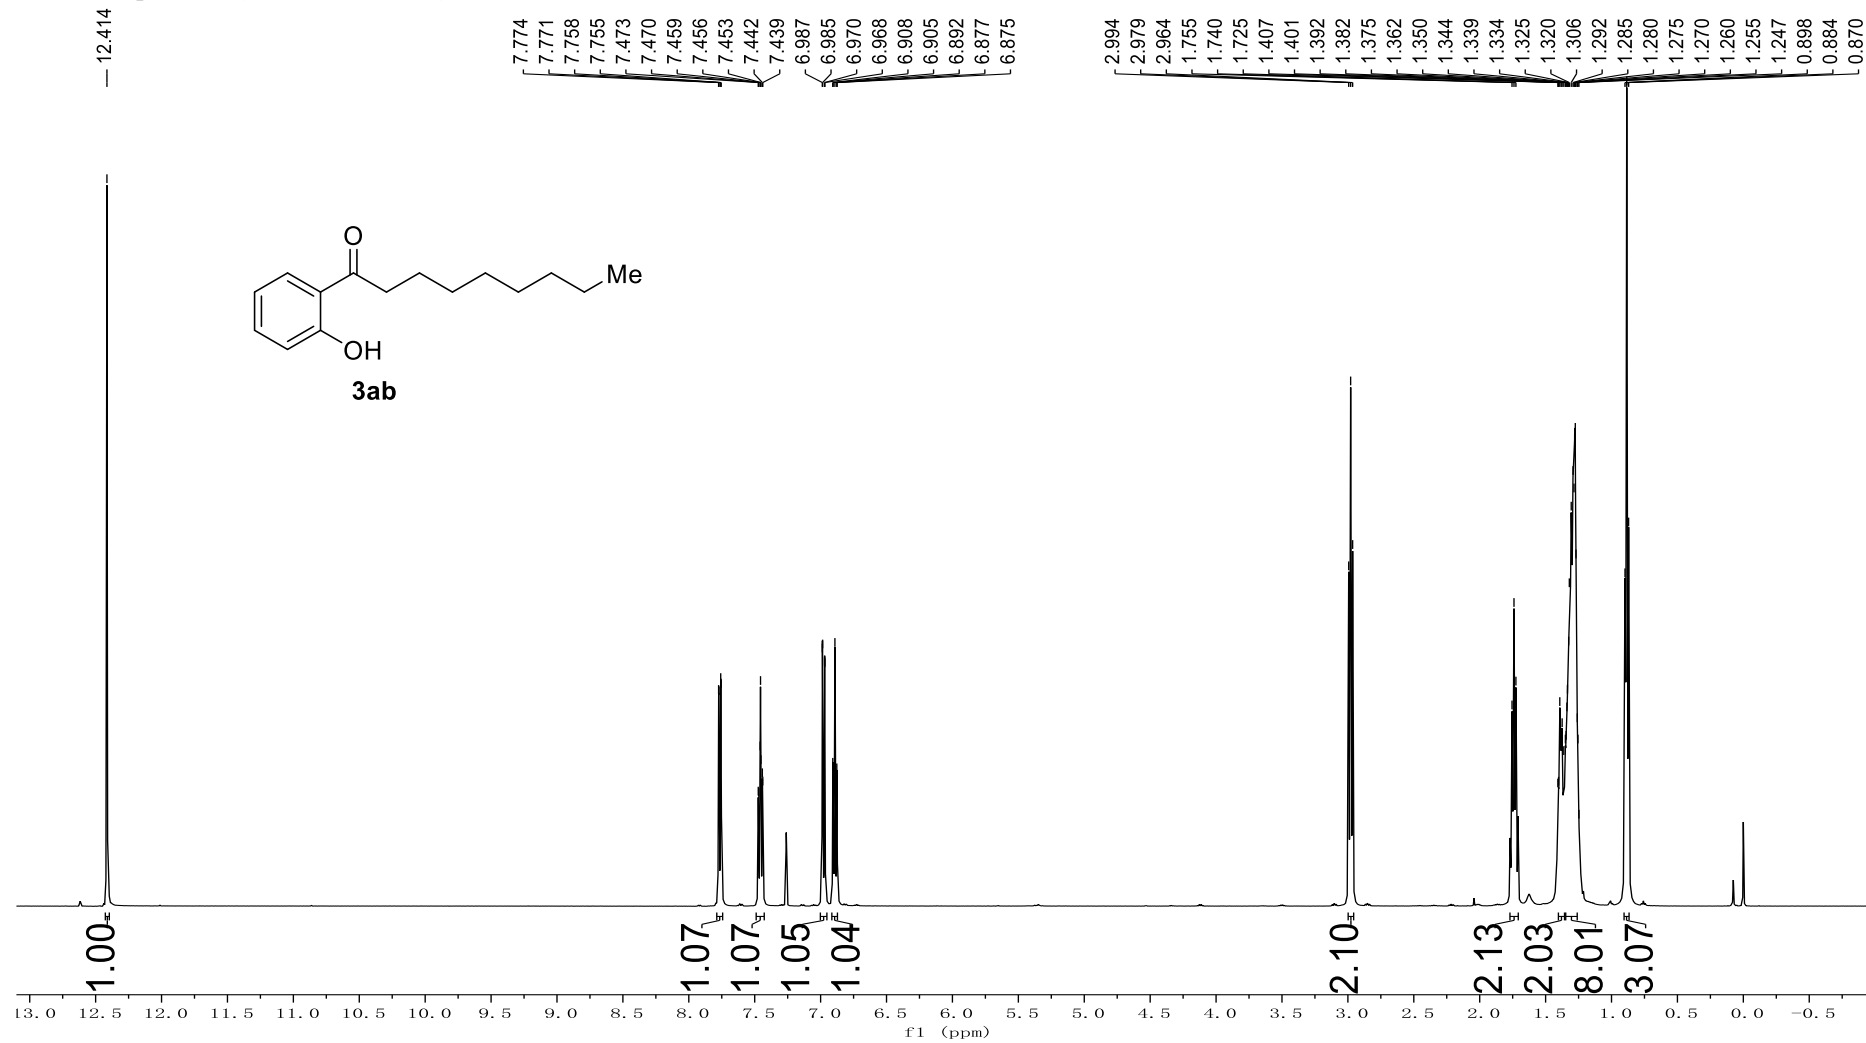



$^{13}\text{C}$  NMR-spectrum (126 MHz,  $\text{CDCl}_3$ ) of **3ab**

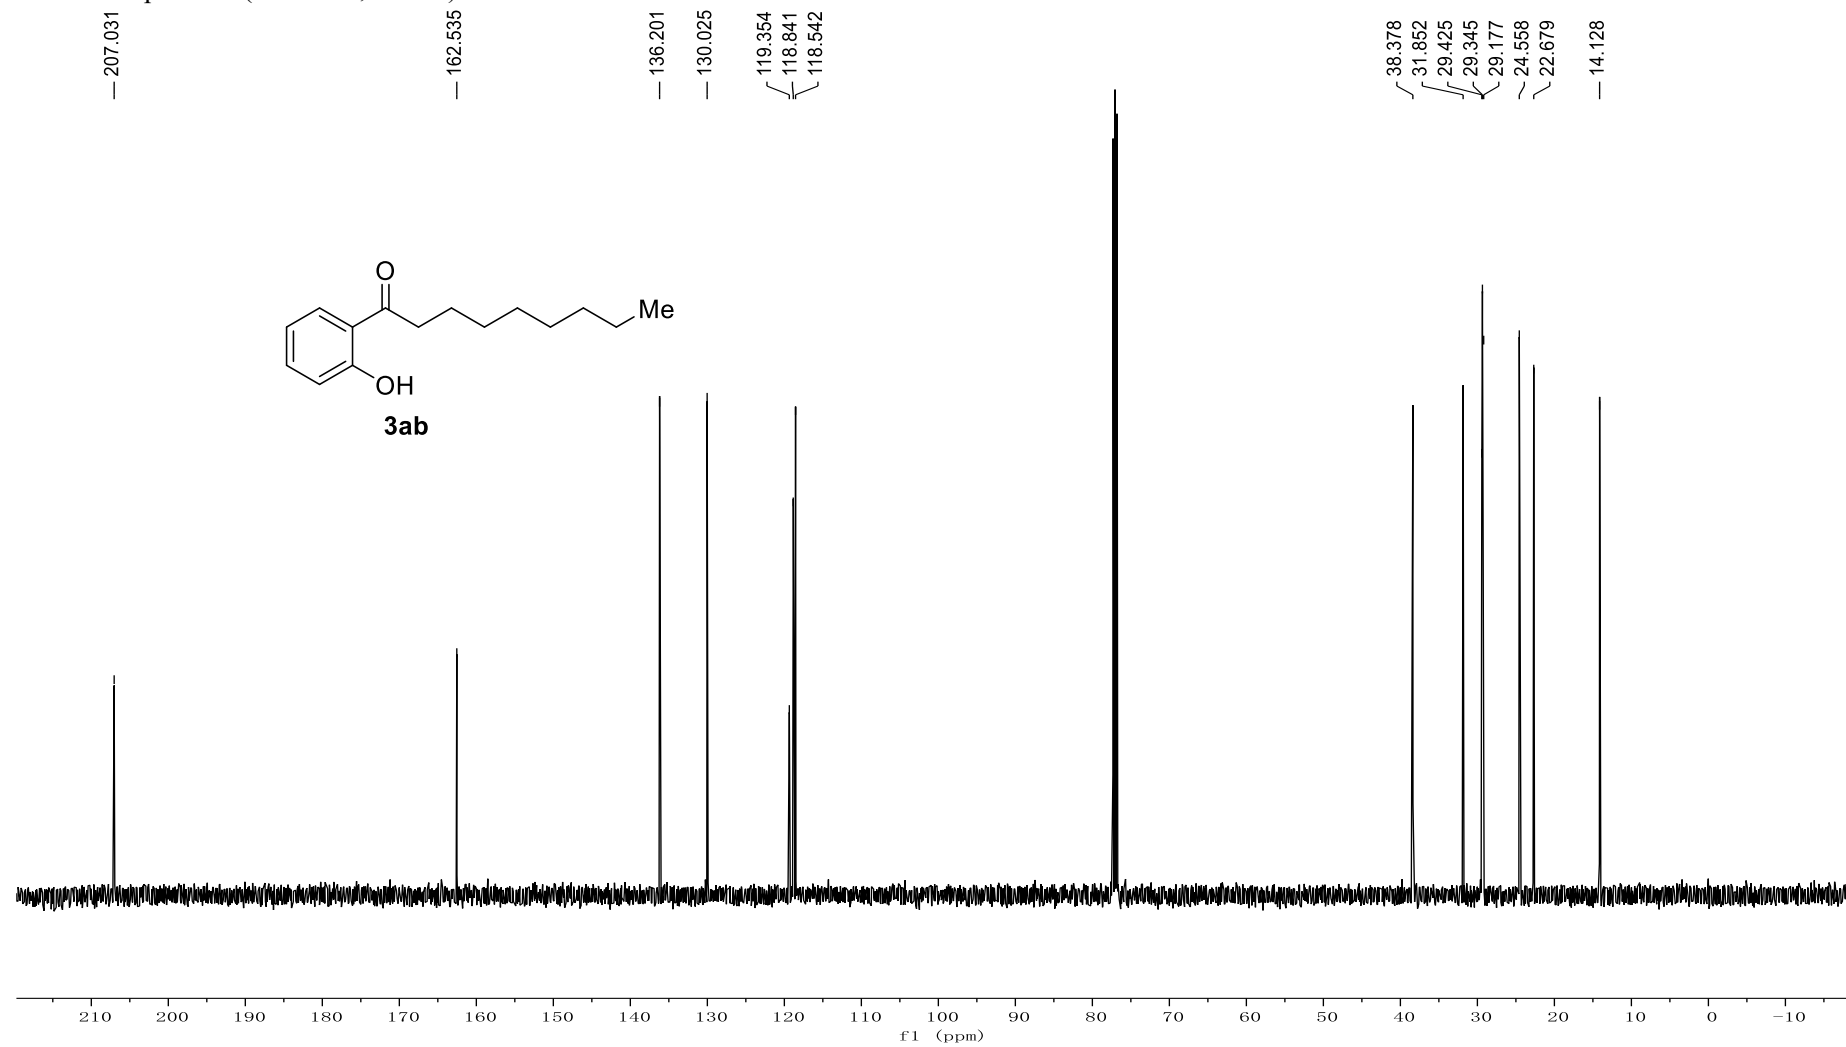

$^1\text{H}$  NMR-spectrum (500 MHz,  $\text{CDCl}_3$ ) of **3ac**

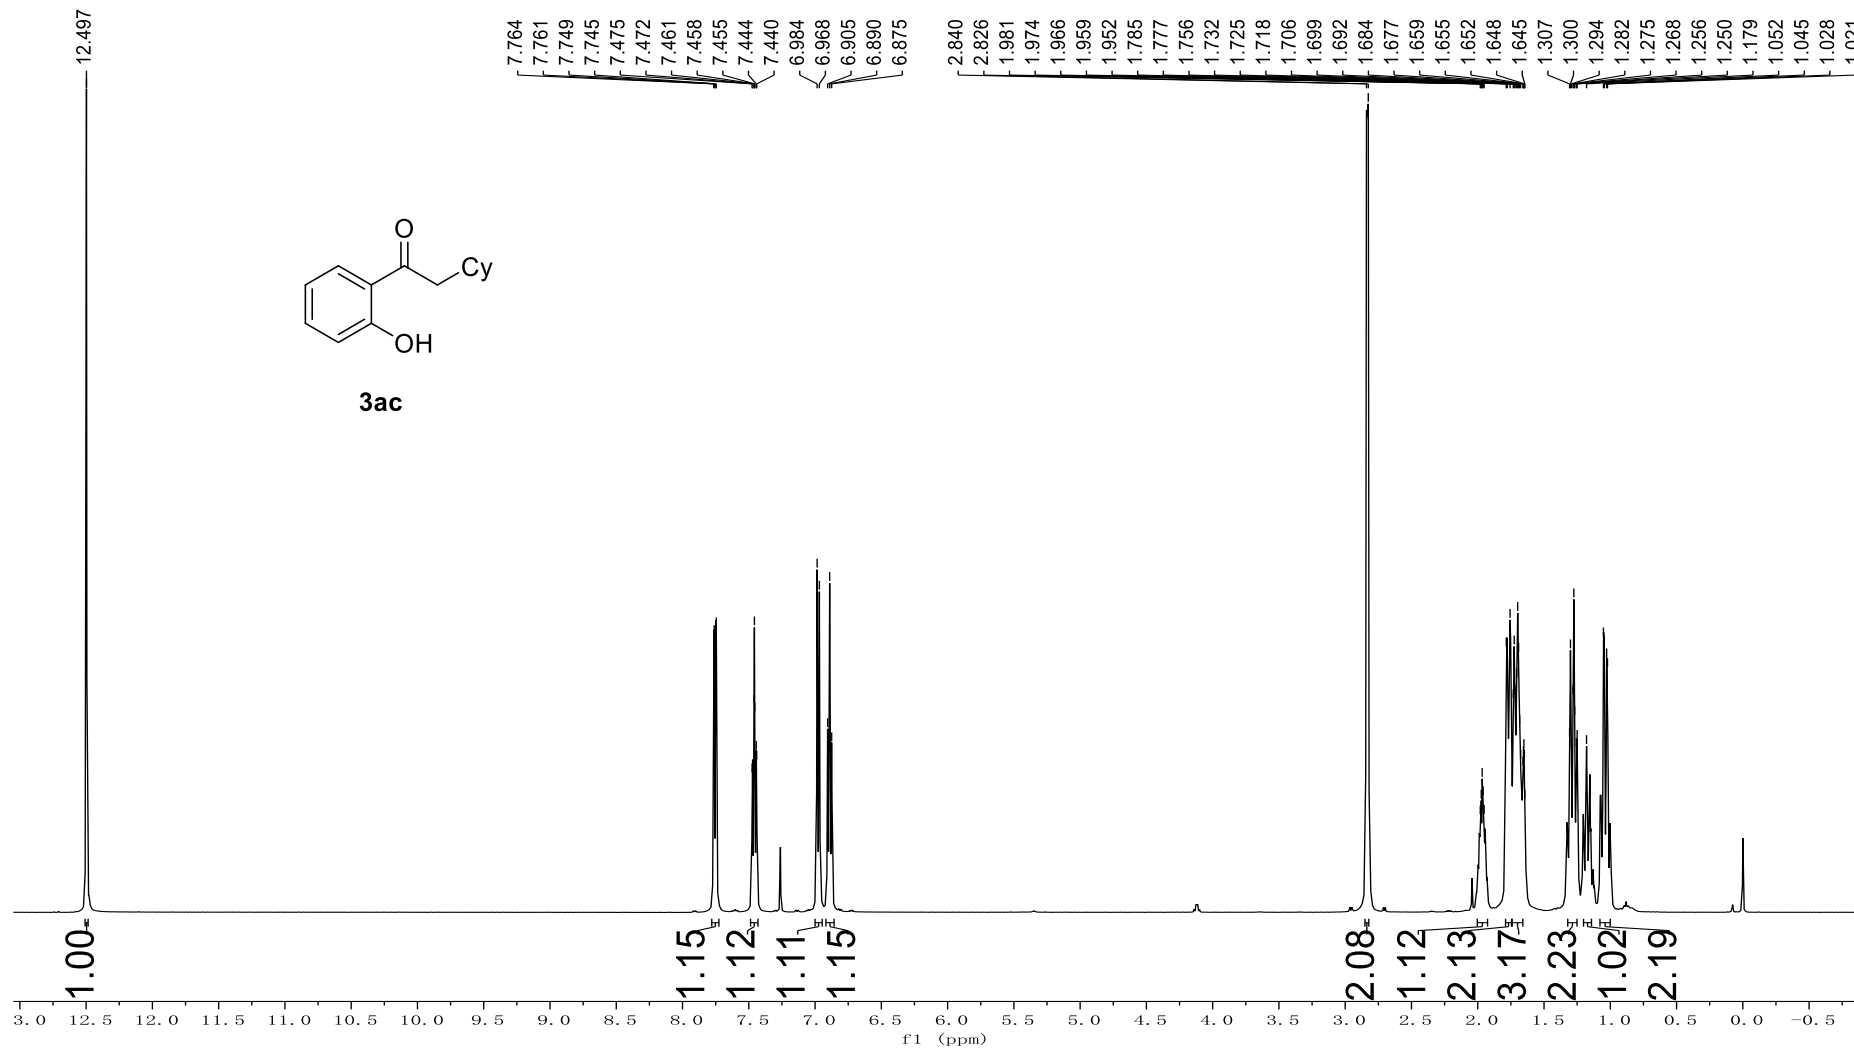

$^{13}\text{C}$  NMR-spectrum (126 MHz,  $\text{CDCl}_3$ ) of **3ac**

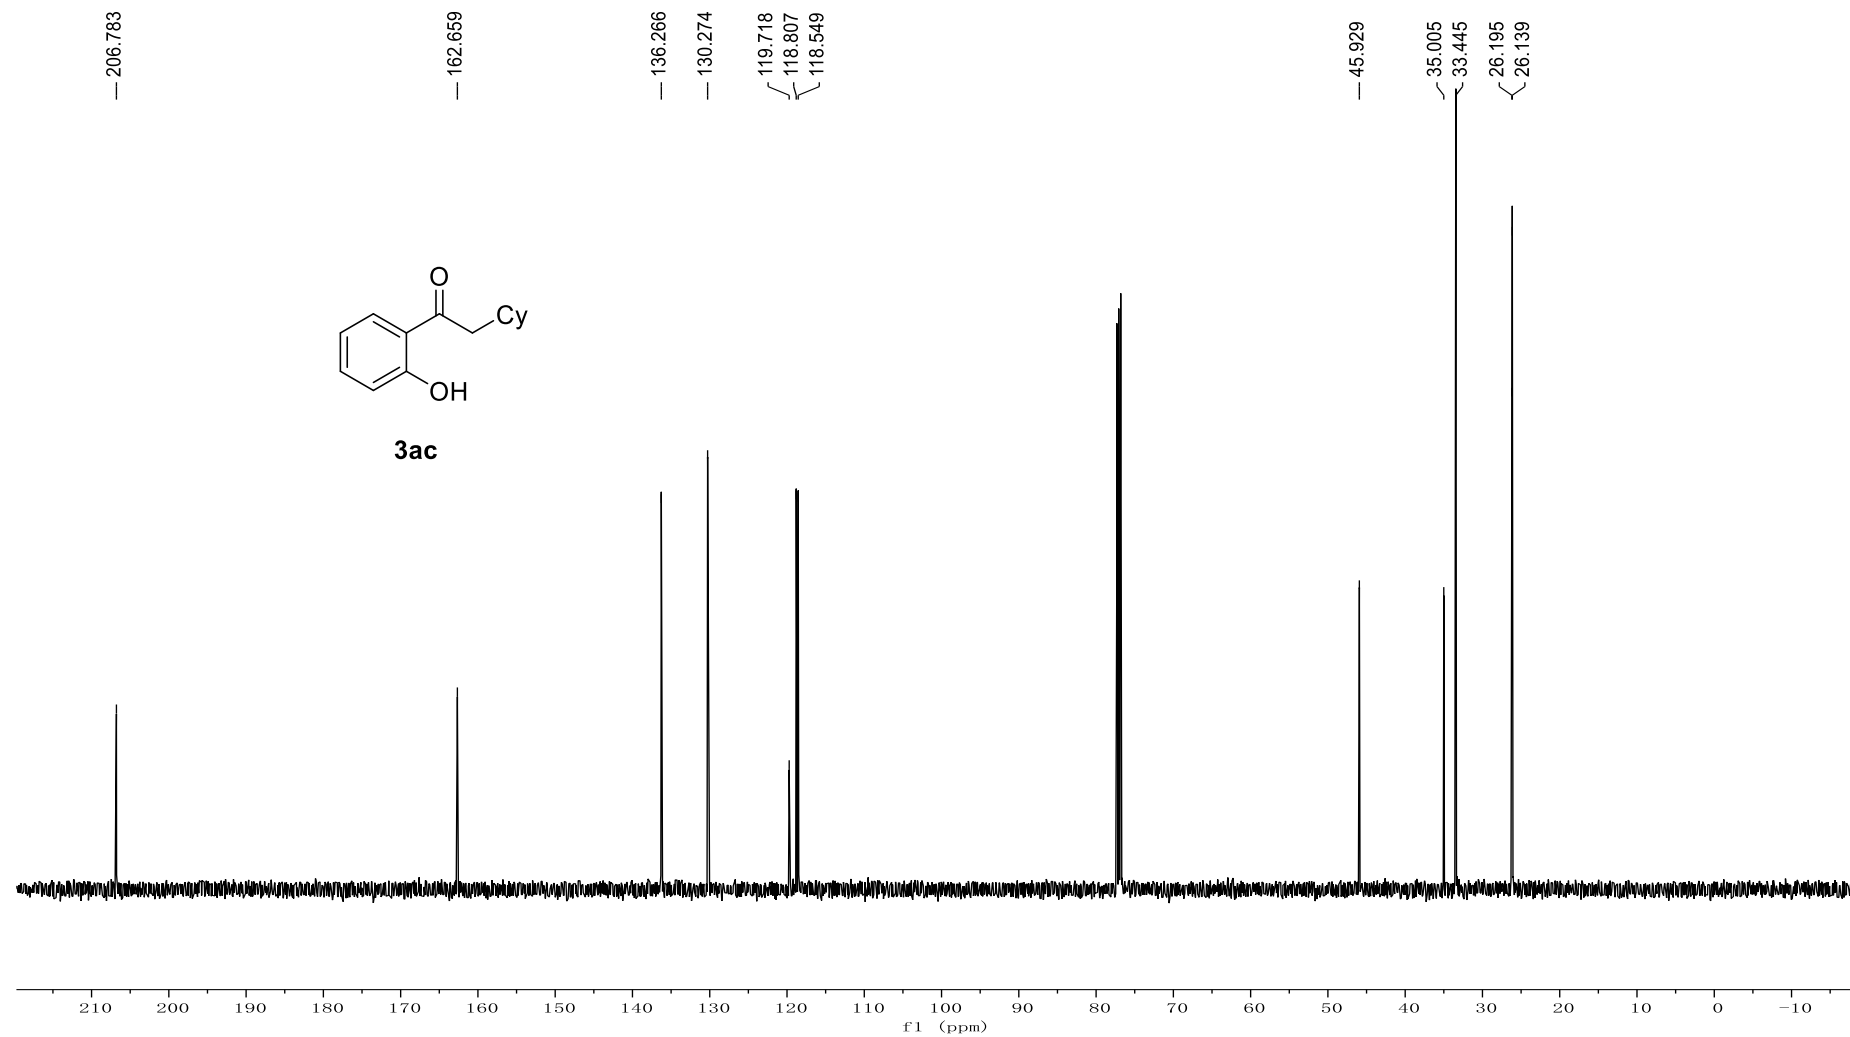

<sup>1</sup>H NMR-spectrum (500 MHz, CDCl<sub>3</sub>) of **3ad**

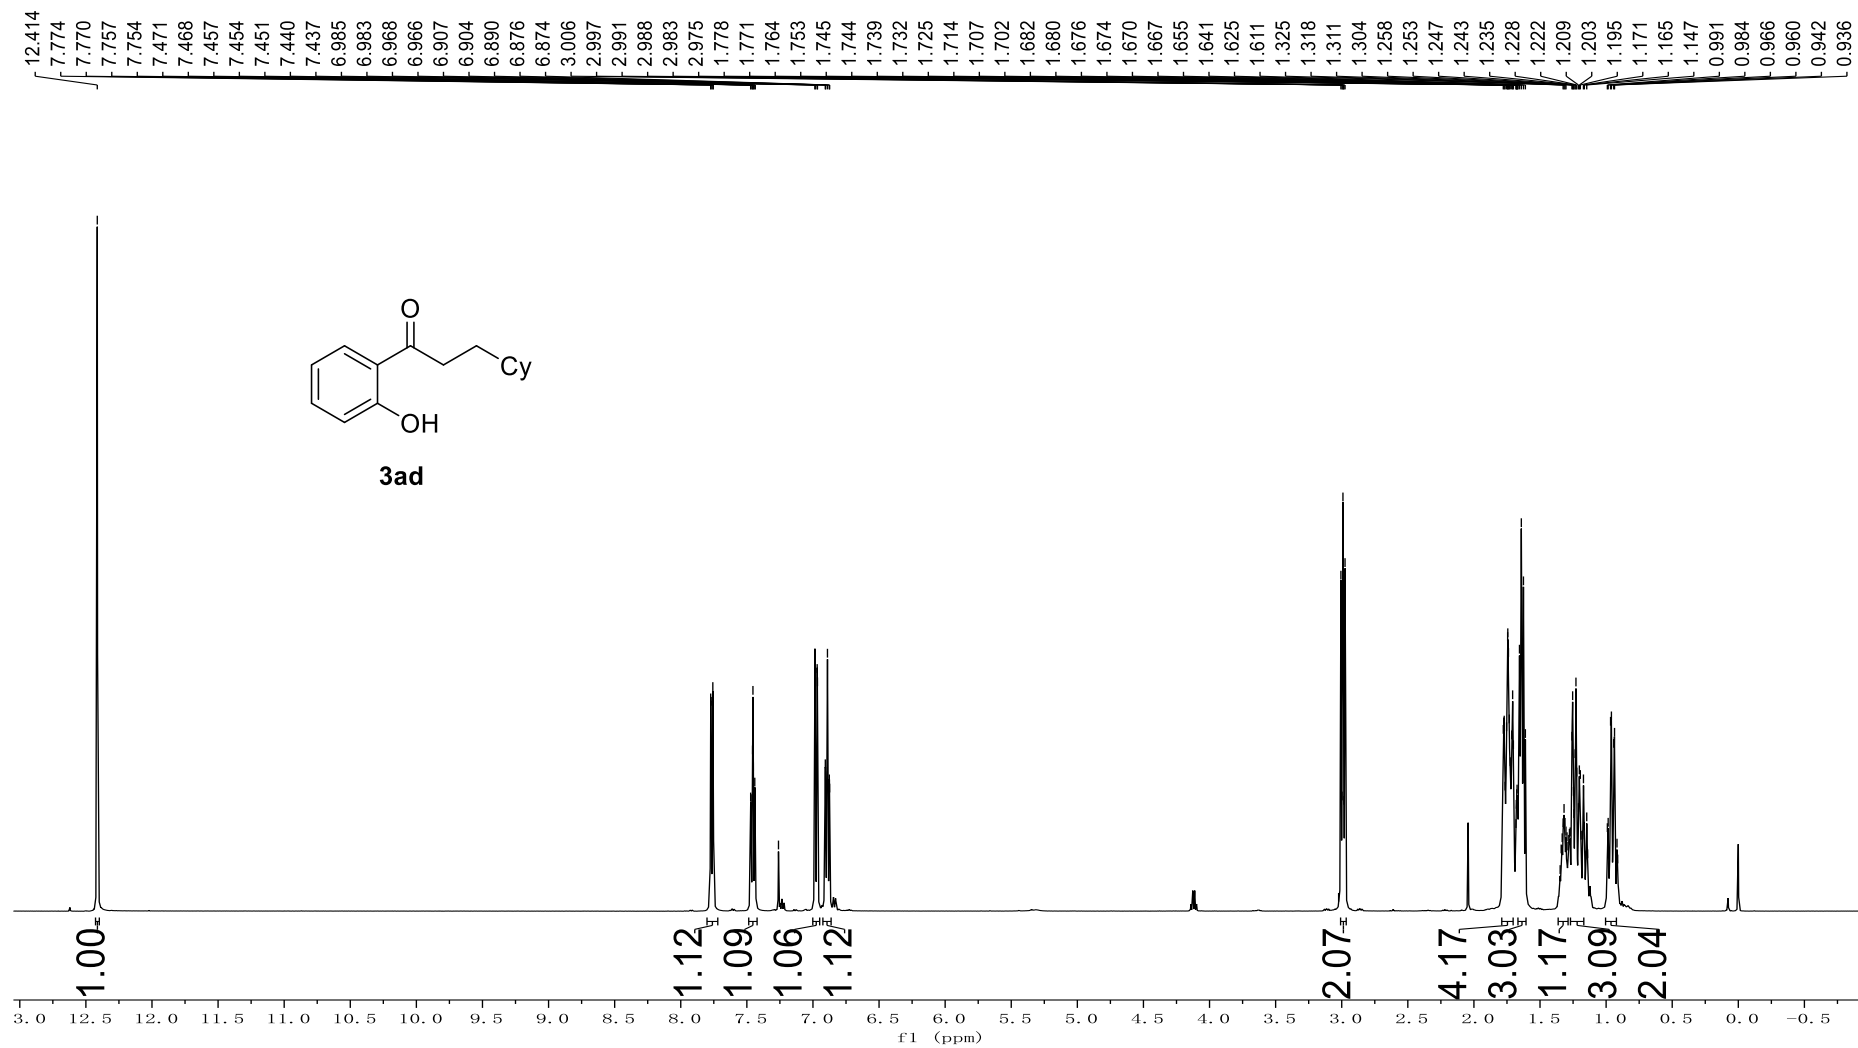

$^{13}\text{C}$  NMR-spectrum (126 MHz,  $\text{CDCl}_3$ ) of **3ad**

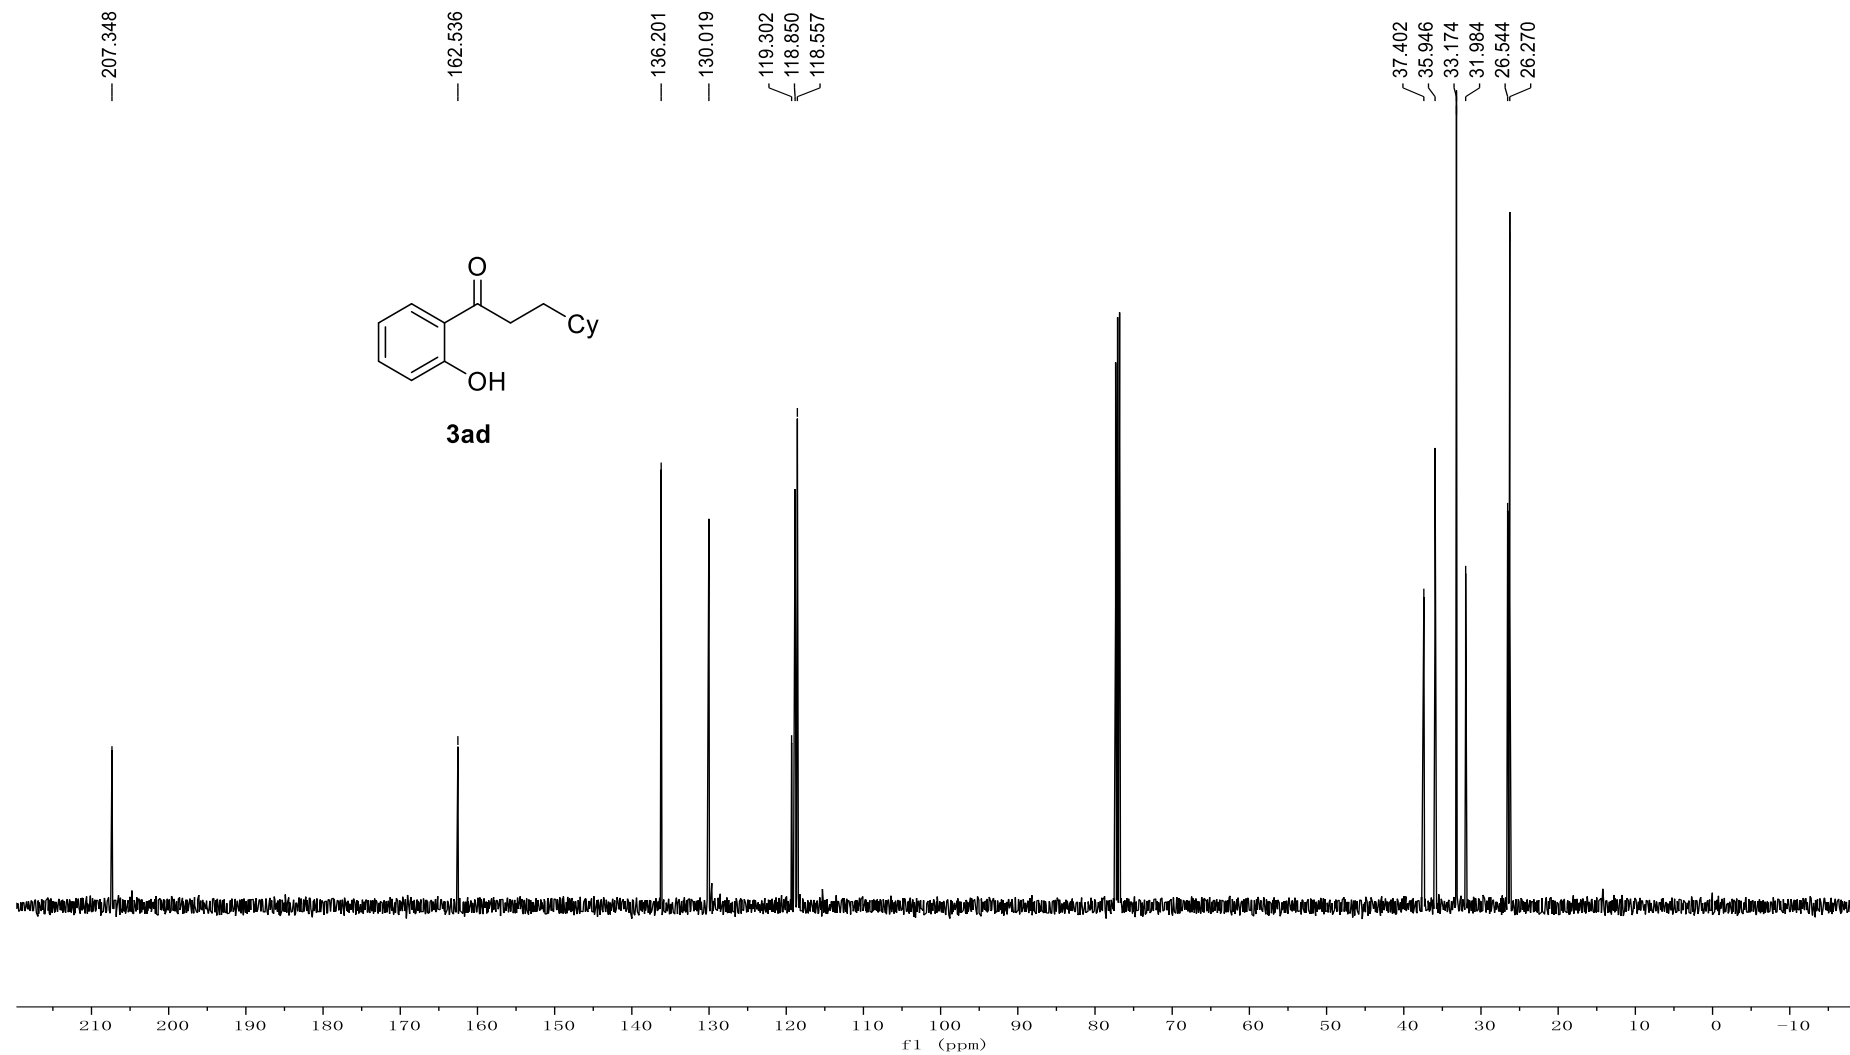

$^1\text{H}$  NMR-spectrum (500 MHz,  $\text{CDCl}_3$ ) of **3ae**

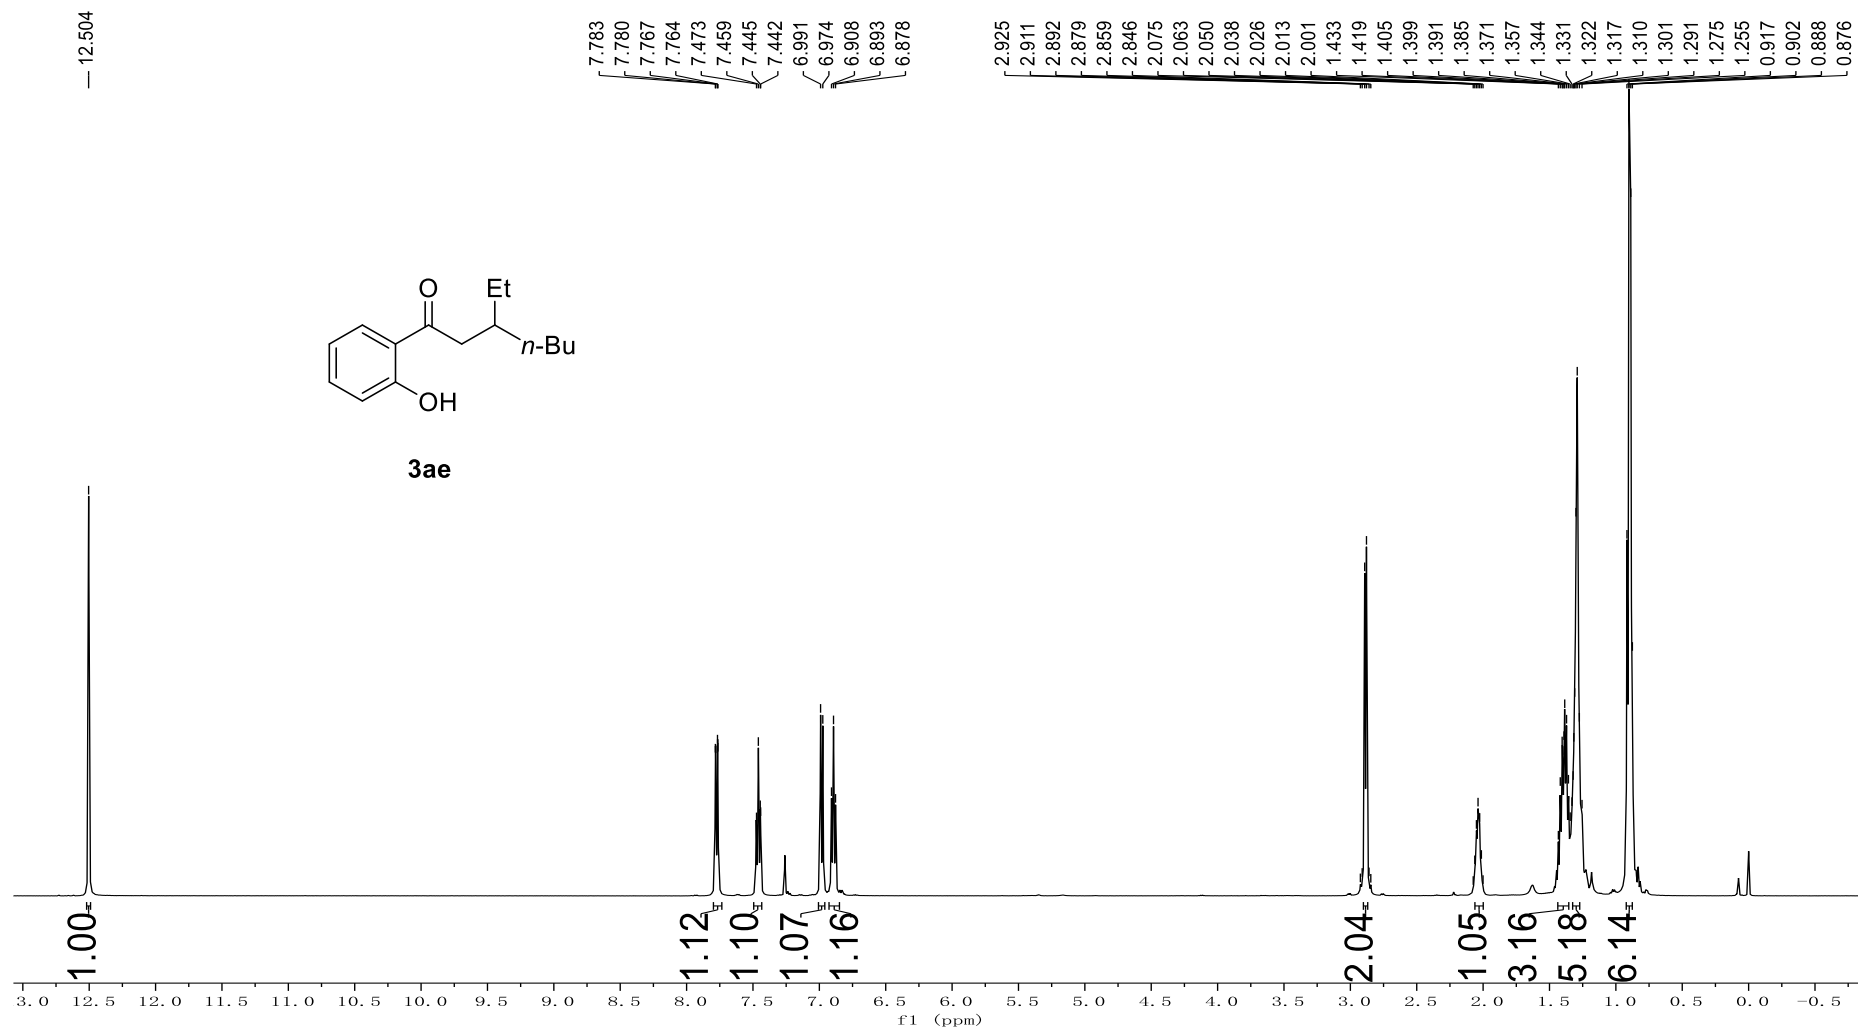

$^{13}\text{C}$  NMR-spectrum (126 MHz,  $\text{CDCl}_3$ ) of **3ae**

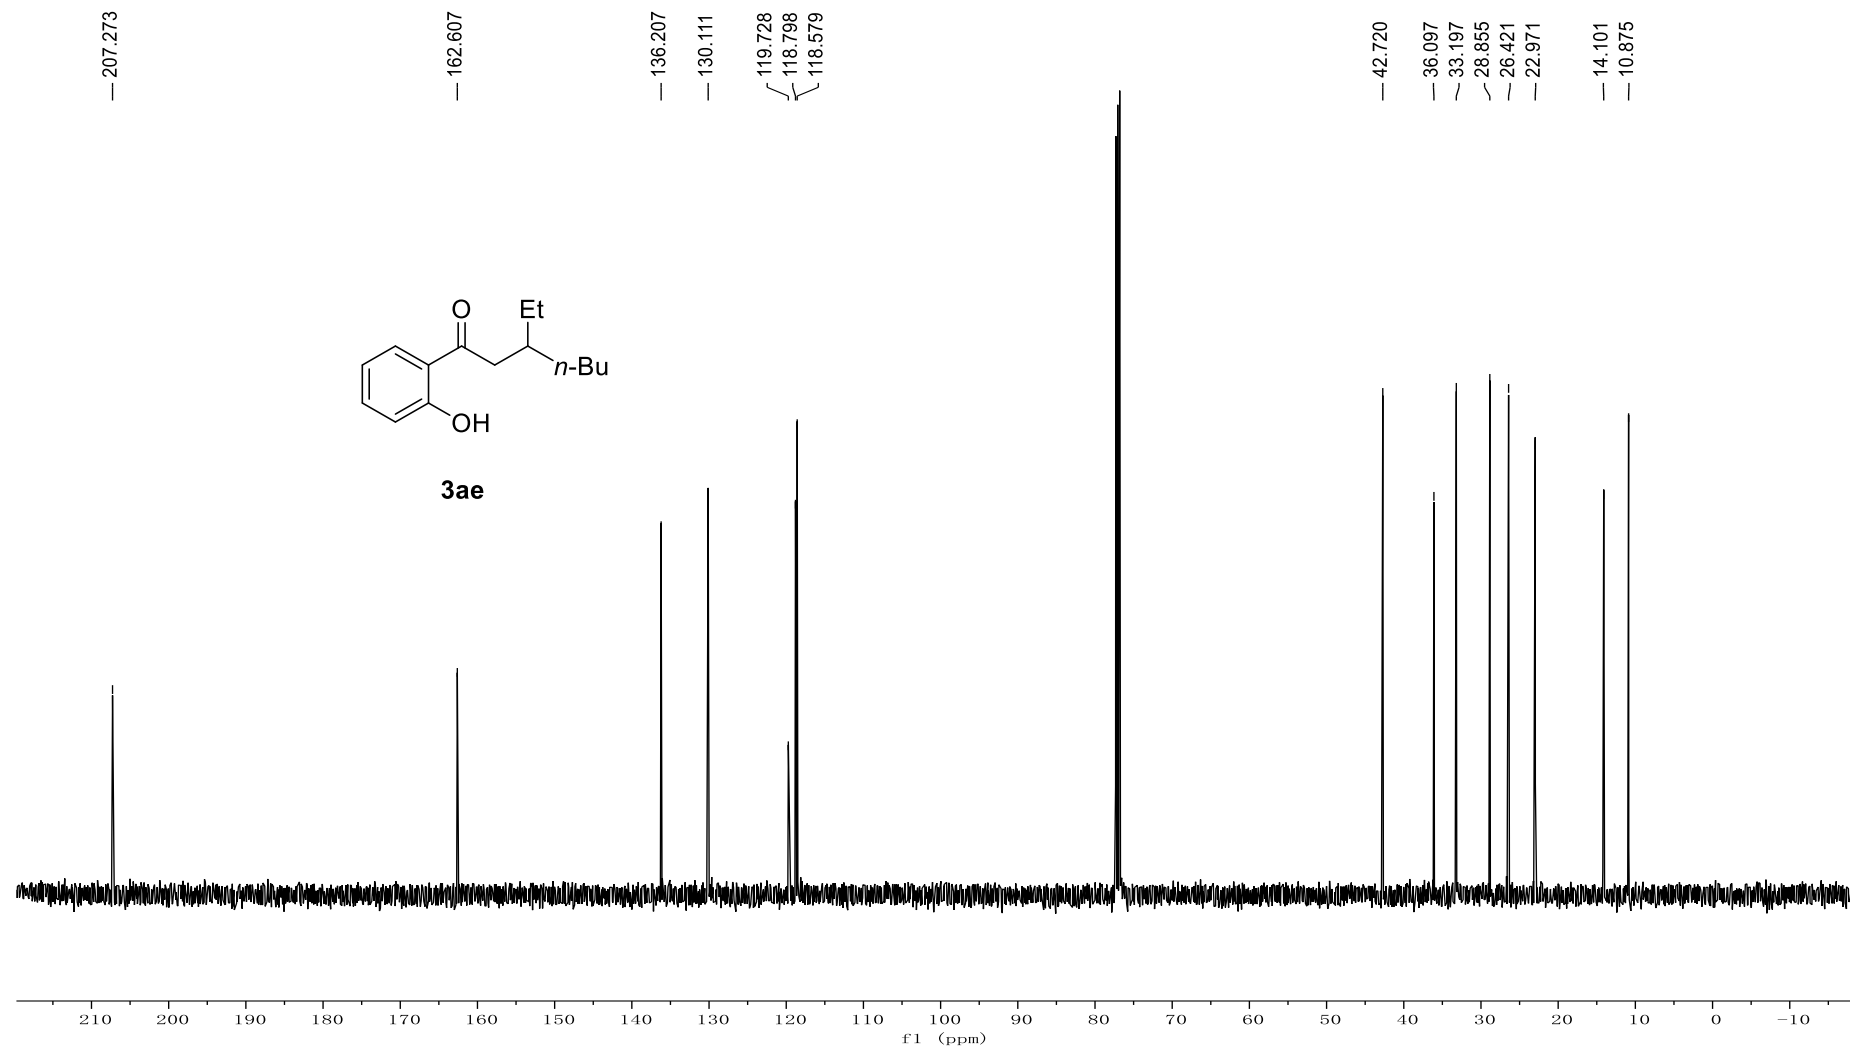

<sup>1</sup>H NMR-spectrum (400 MHz, CDCl<sub>3</sub>) of **3af**

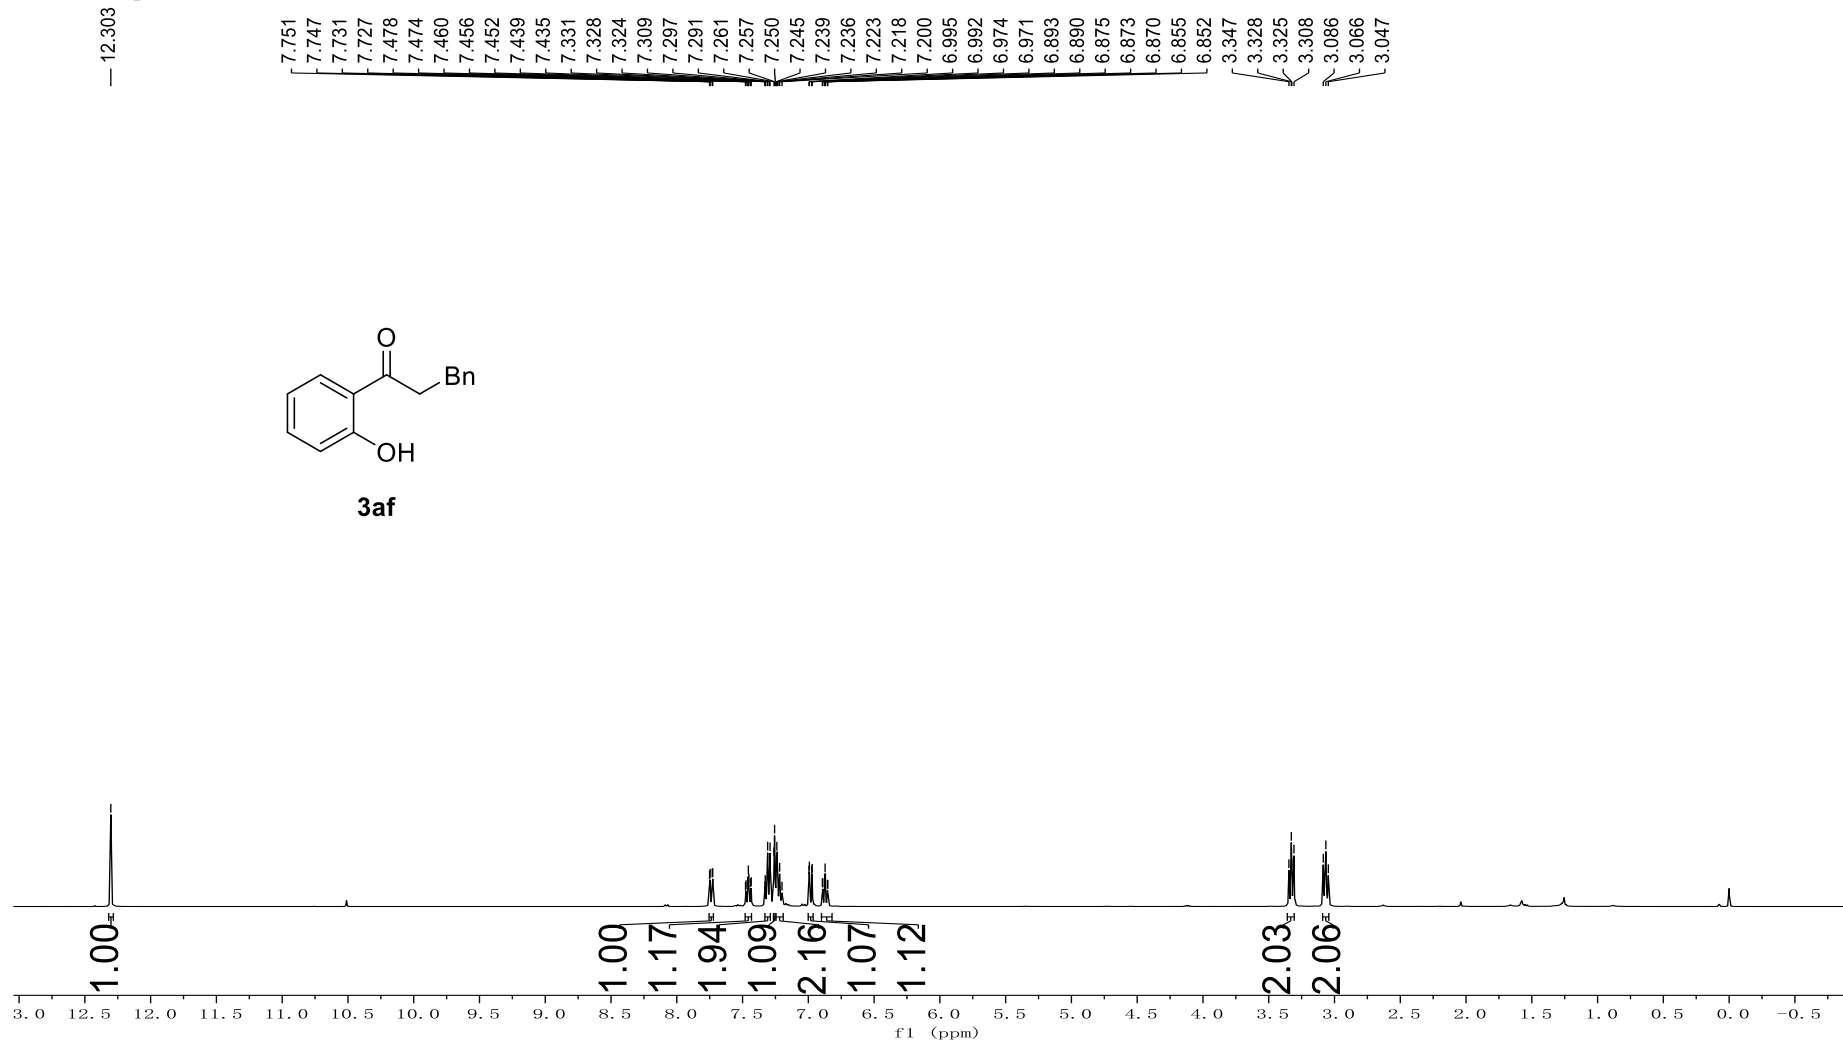



$^{13}\text{C}$  NMR-spectrum (101 MHz,  $\text{CDCl}_3$ ) of **3af**

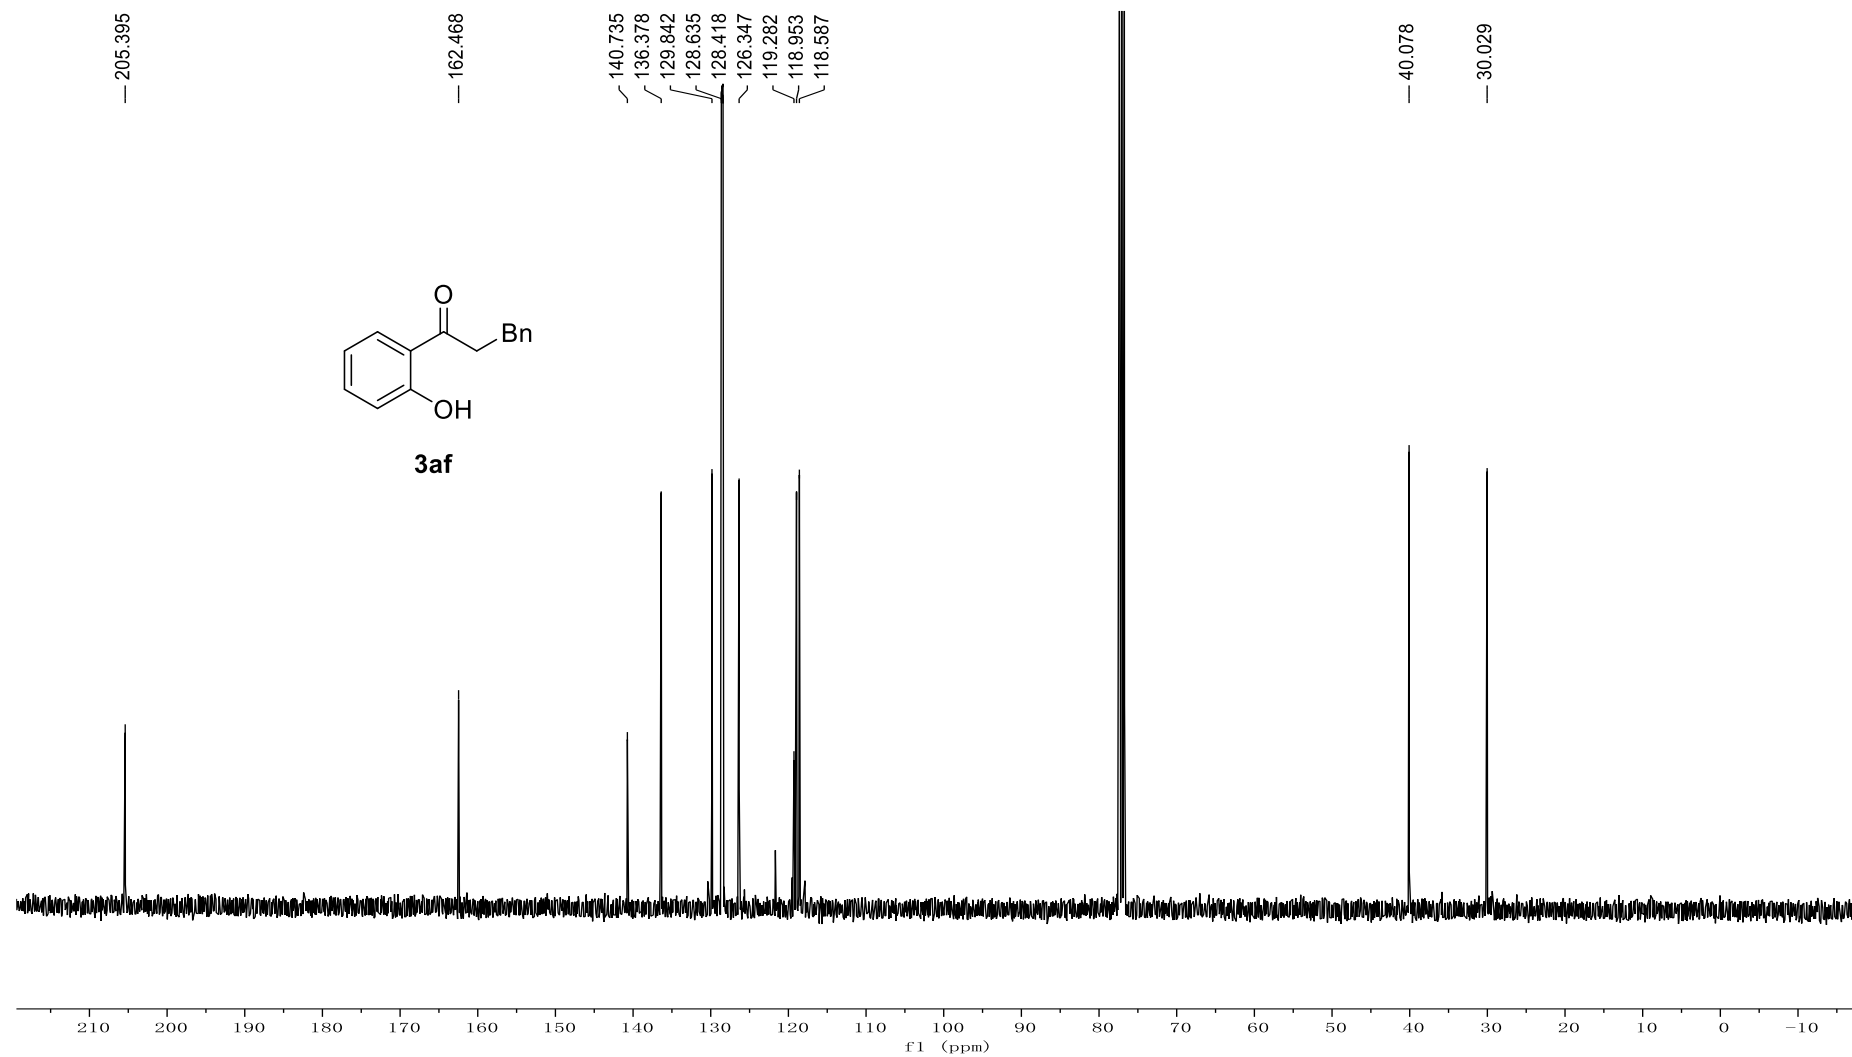

$^1\text{H}$  NMR-spectrum (400 MHz,  $\text{CDCl}_3$ ) of **3ah**

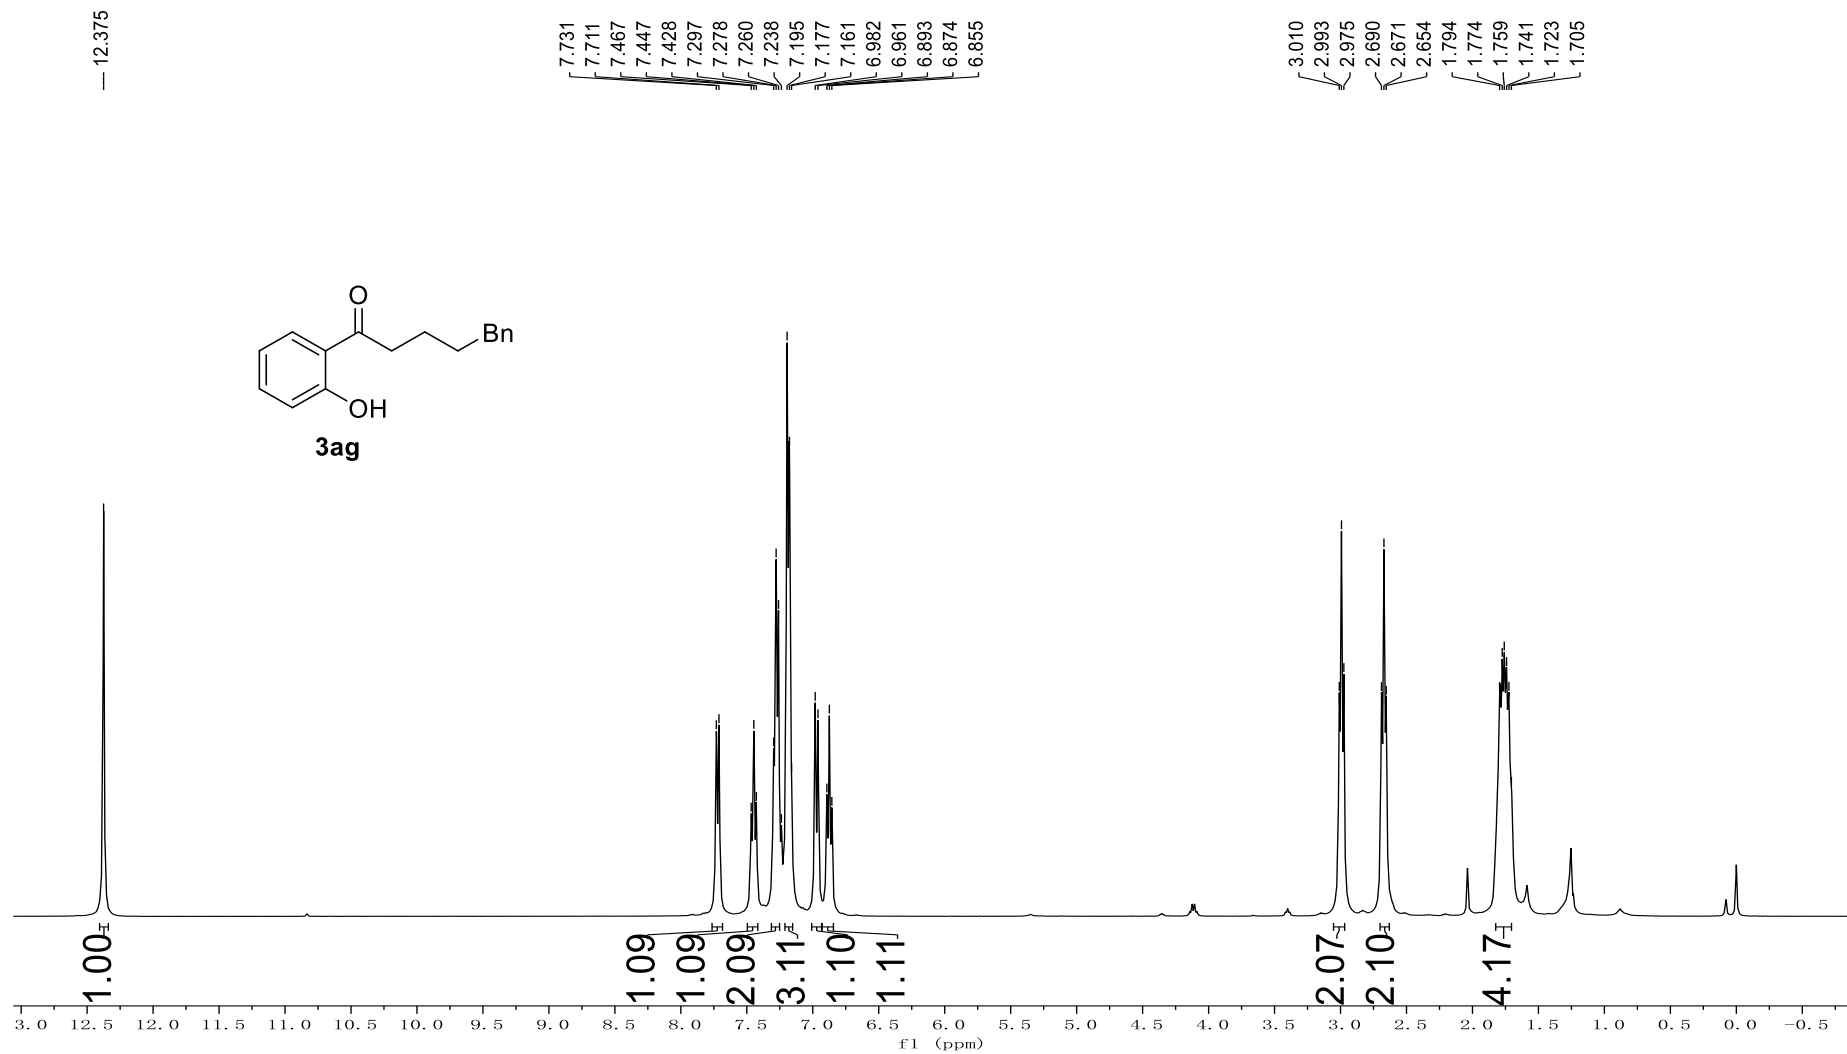

$^{13}\text{C}$  NMR-spectrum (101 MHz,  $\text{CDCl}_3$ ) of **3ah**

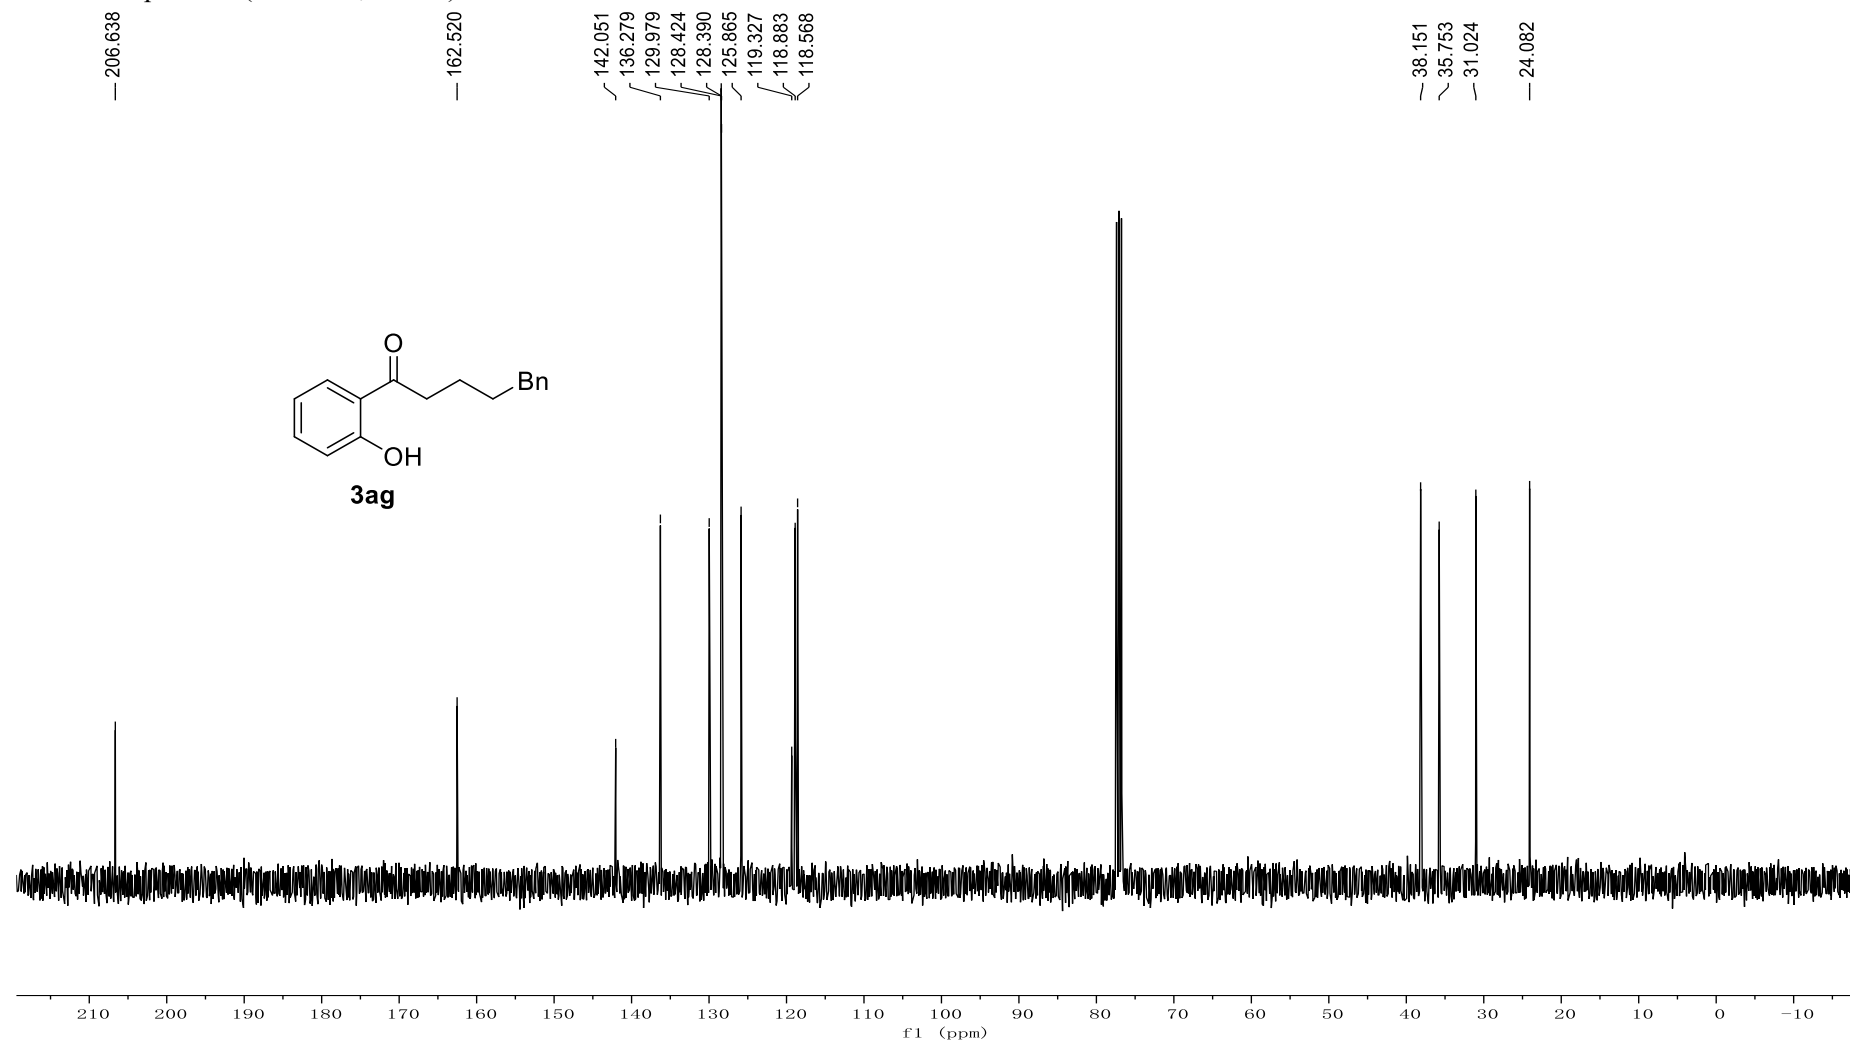

$^1\text{H}$  NMR-spectrum (500 MHz,  $\text{CDCl}_3$ ) of **3ah**

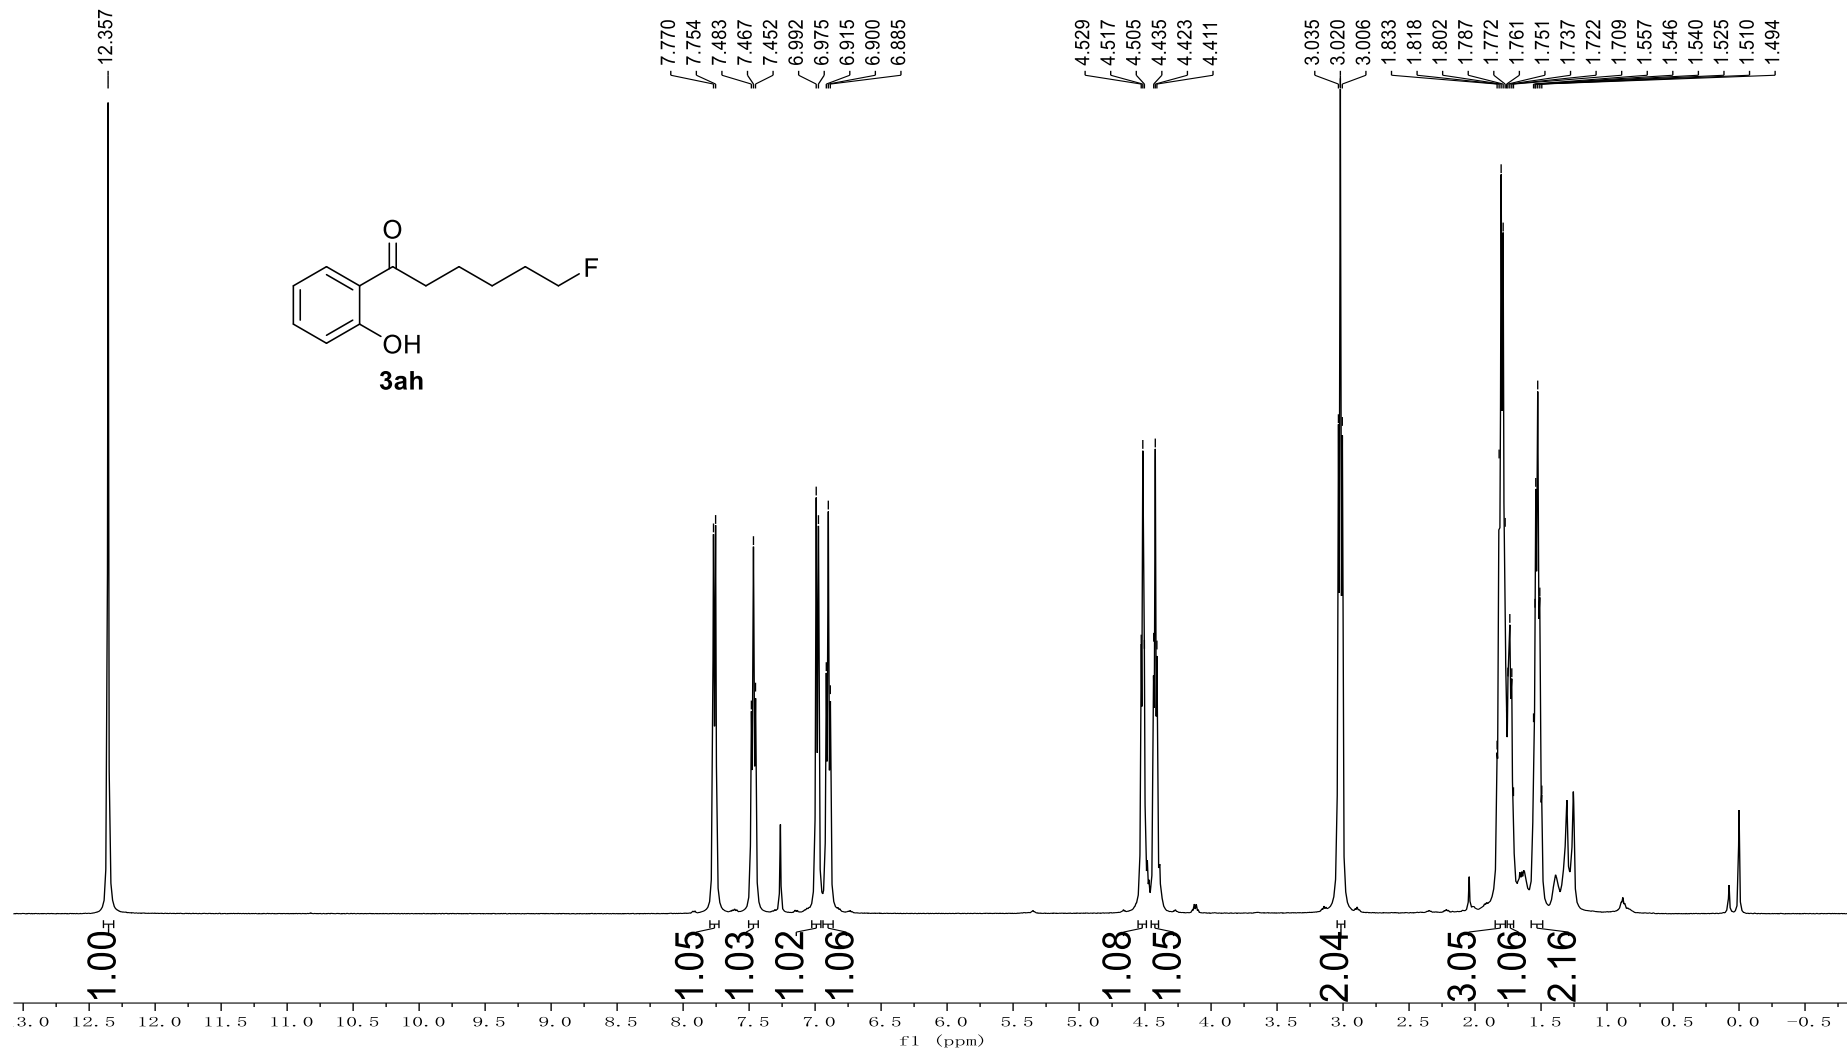

$^{13}\text{C}$  NMR-spectrum (126 MHz,  $\text{CDCl}_3$ ) of **3ah**

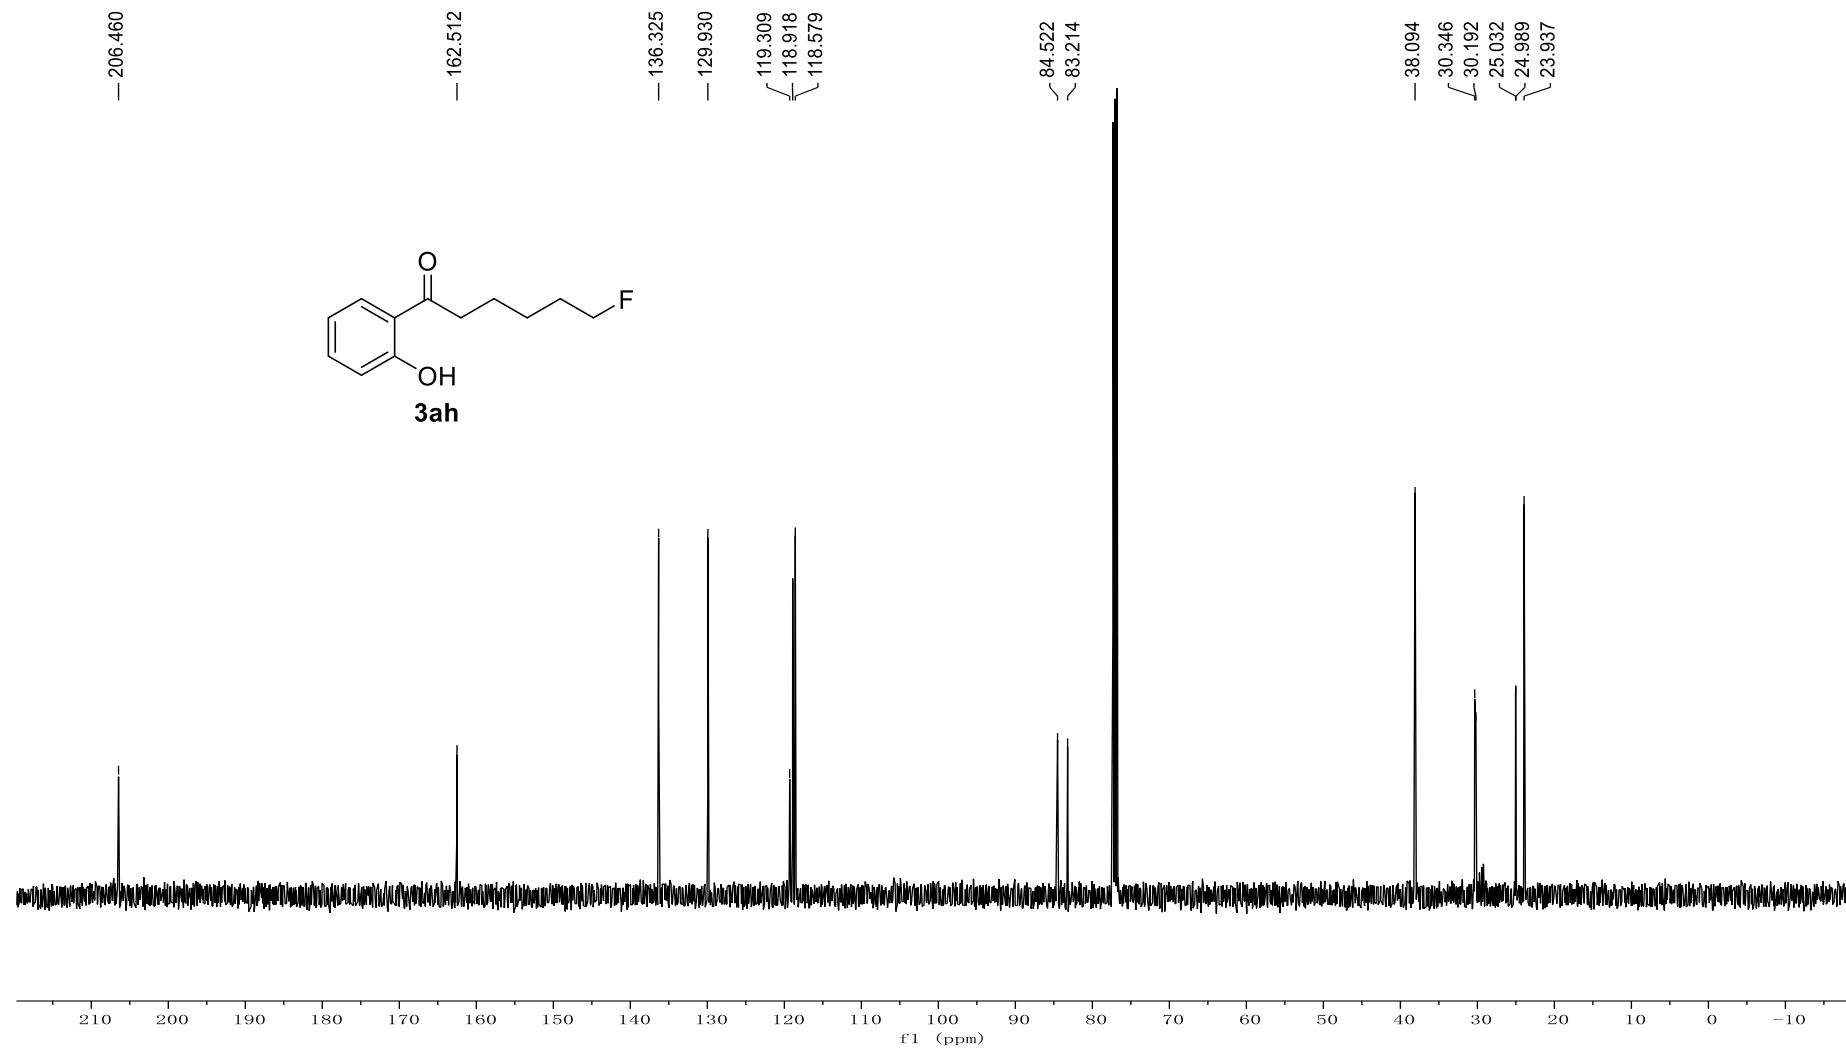

$^{19}\text{F}$  NMR-spectrum (376 MHz,  $\text{CDCl}_3$ ) of **3ah**

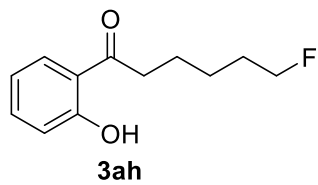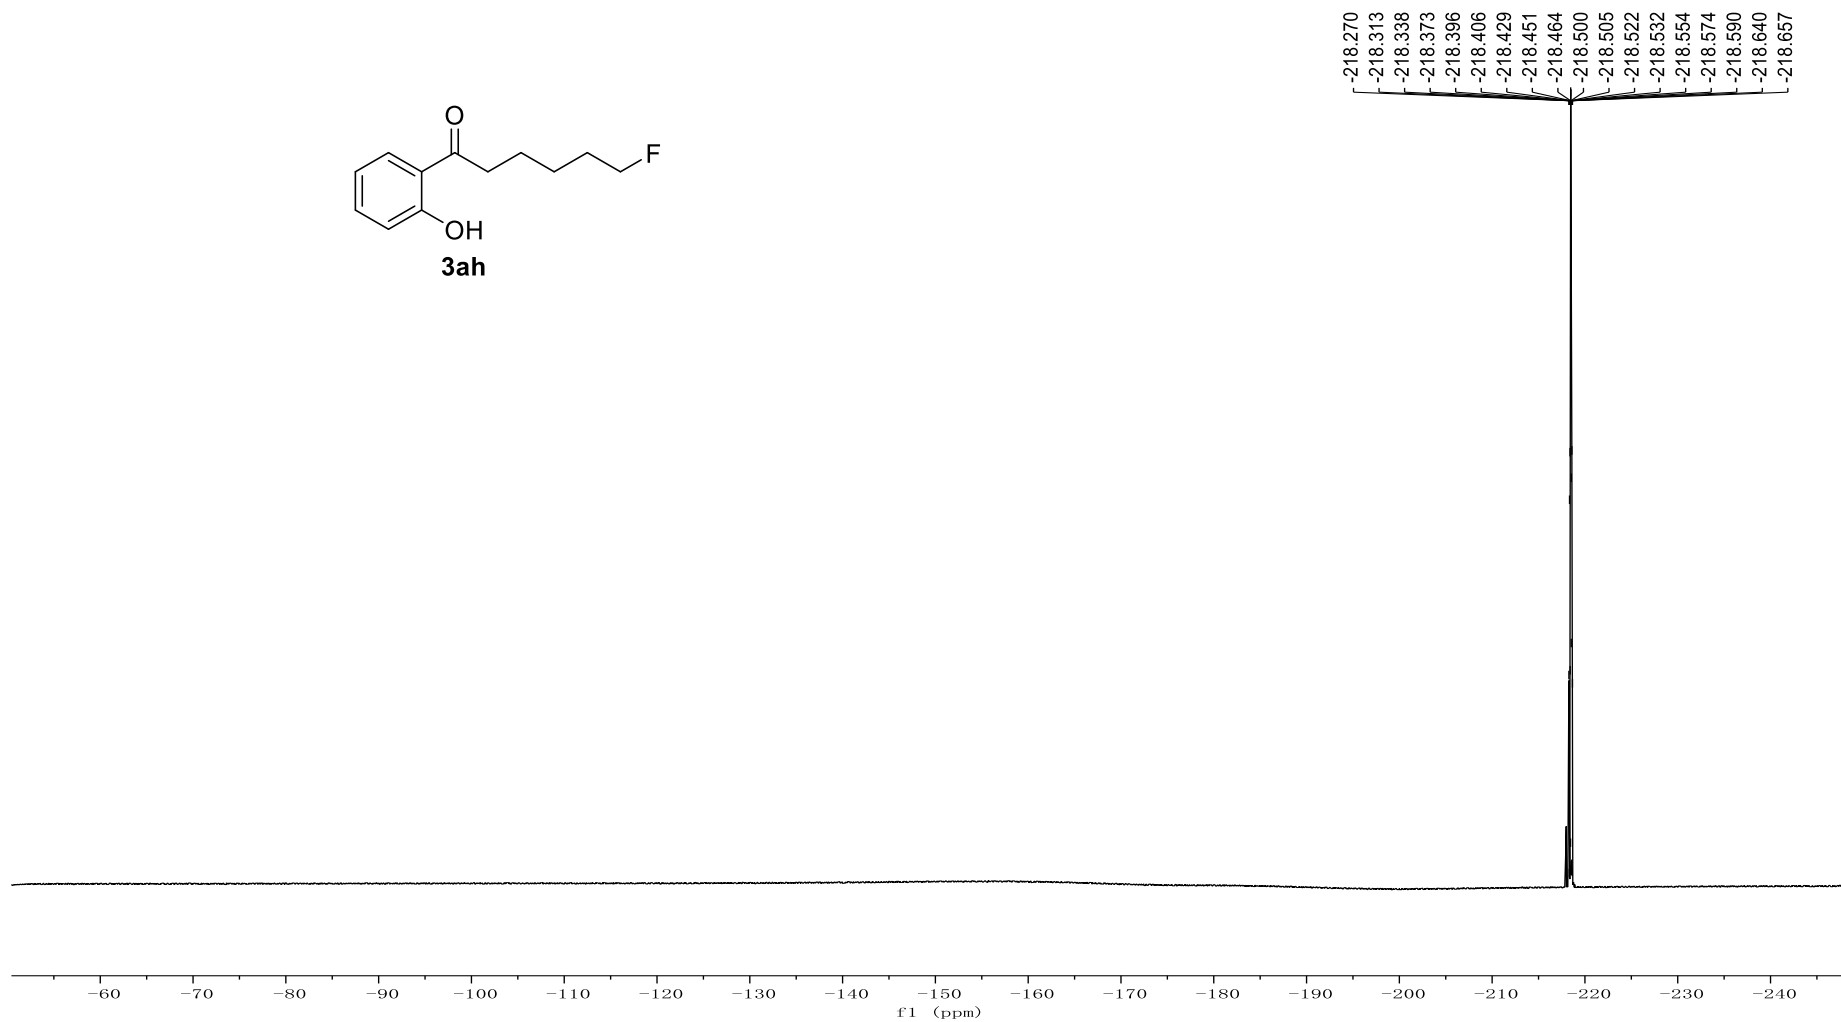

$^1\text{H}$  NMR-spectrum (400 MHz,  $\text{CDCl}_3$ ) of **3ai**

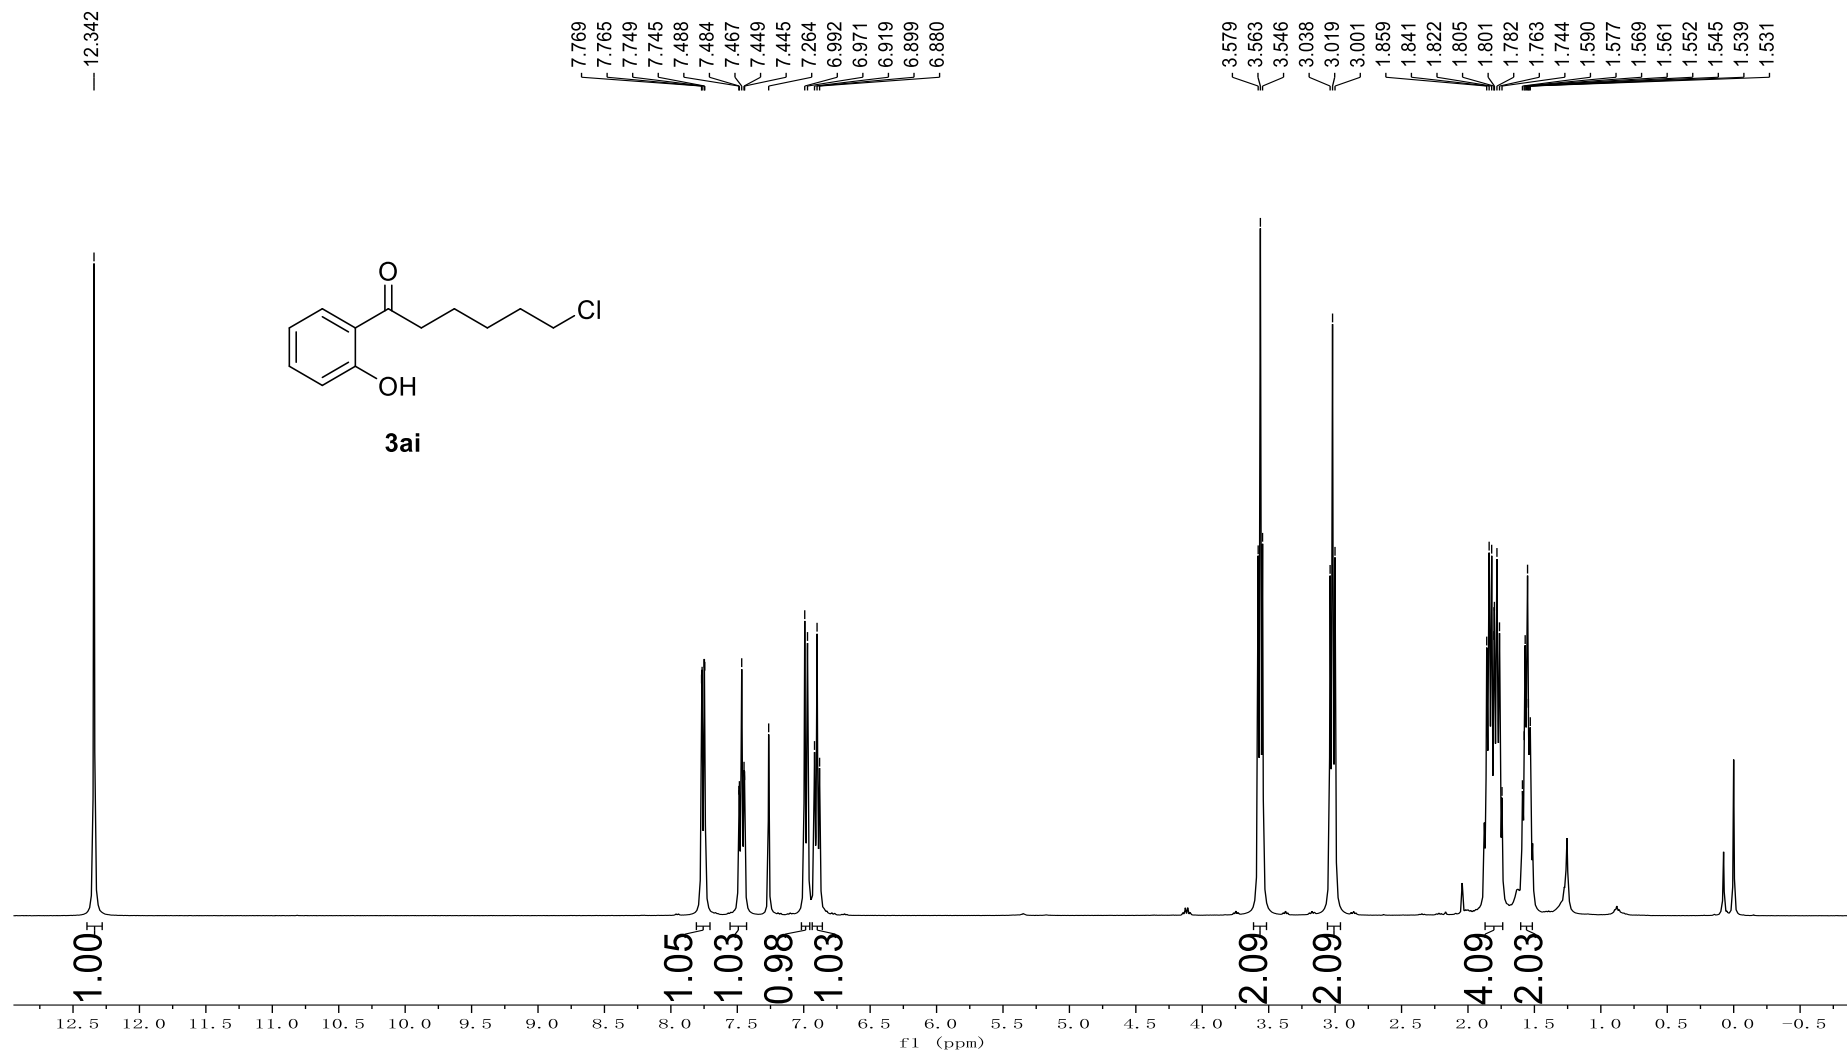

$^{13}\text{C}$  NMR-spectrum (101 MHz,  $\text{CDCl}_3$ ) of **3ai**

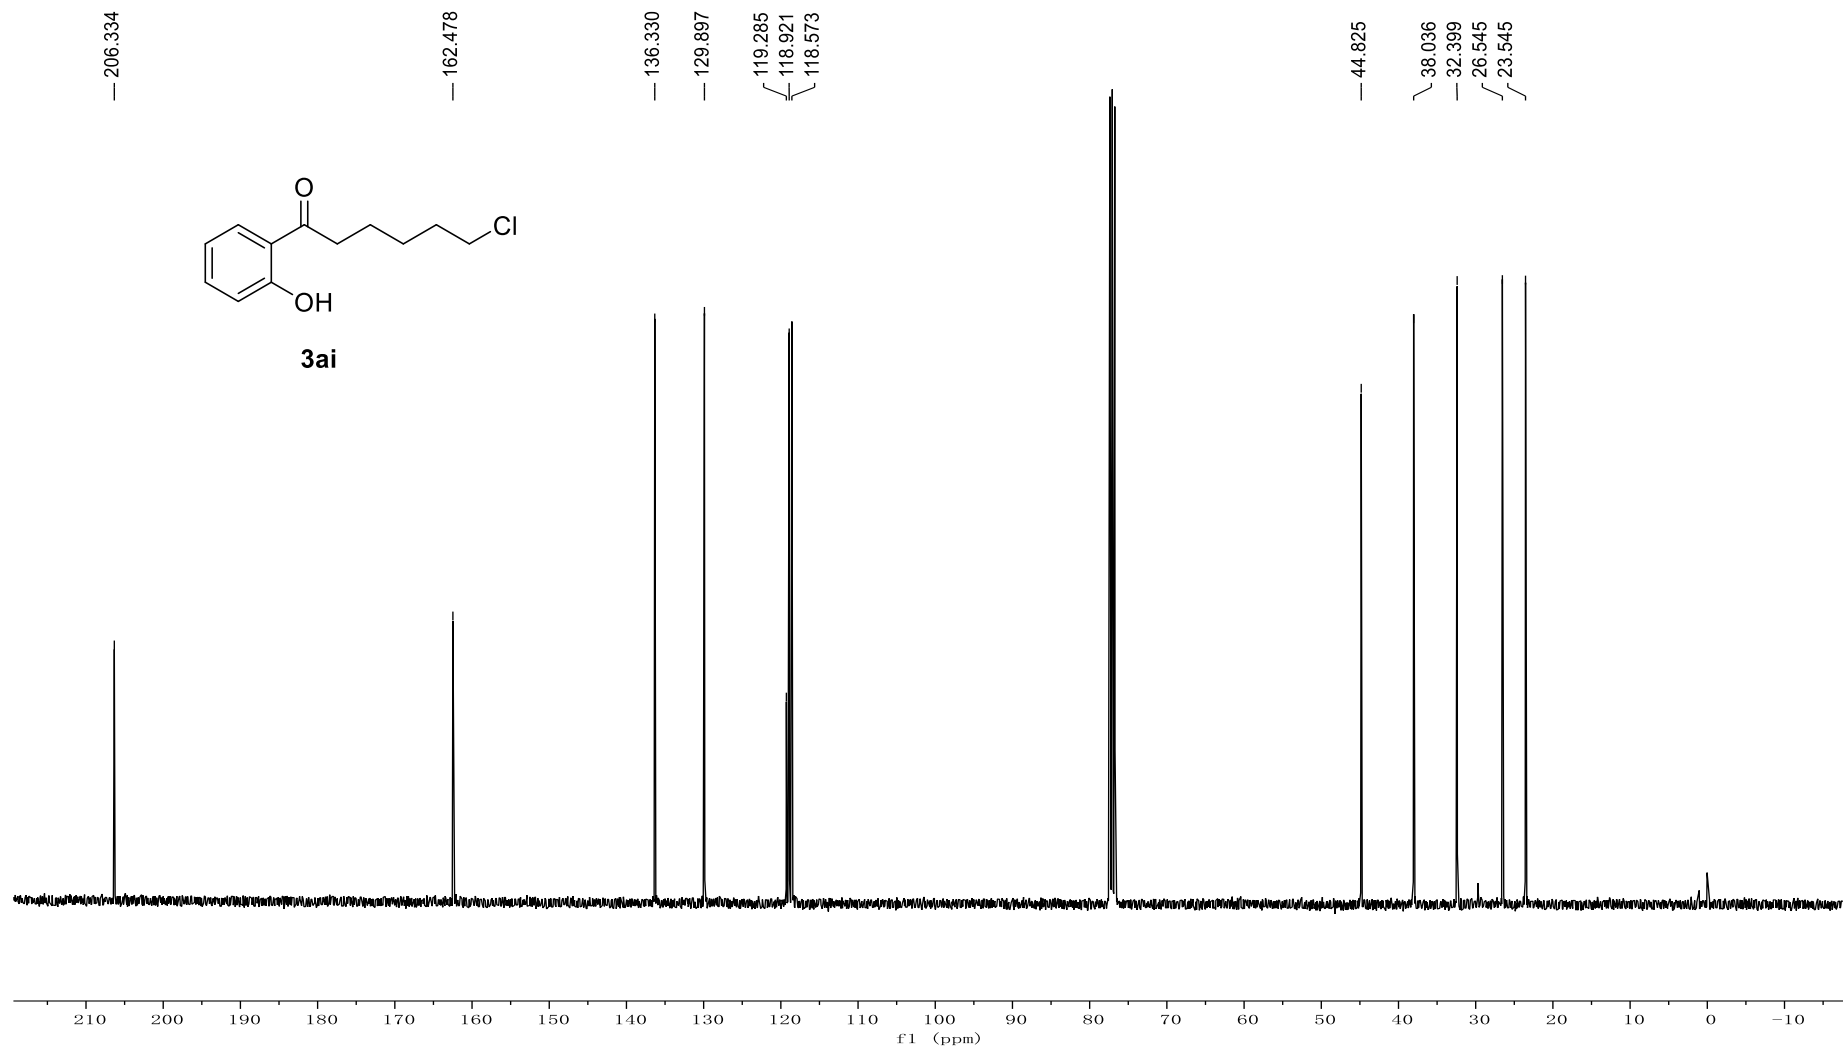



<sup>1</sup>H NMR-spectrum (400 MHz, CDCl<sub>3</sub>) of **3aj**

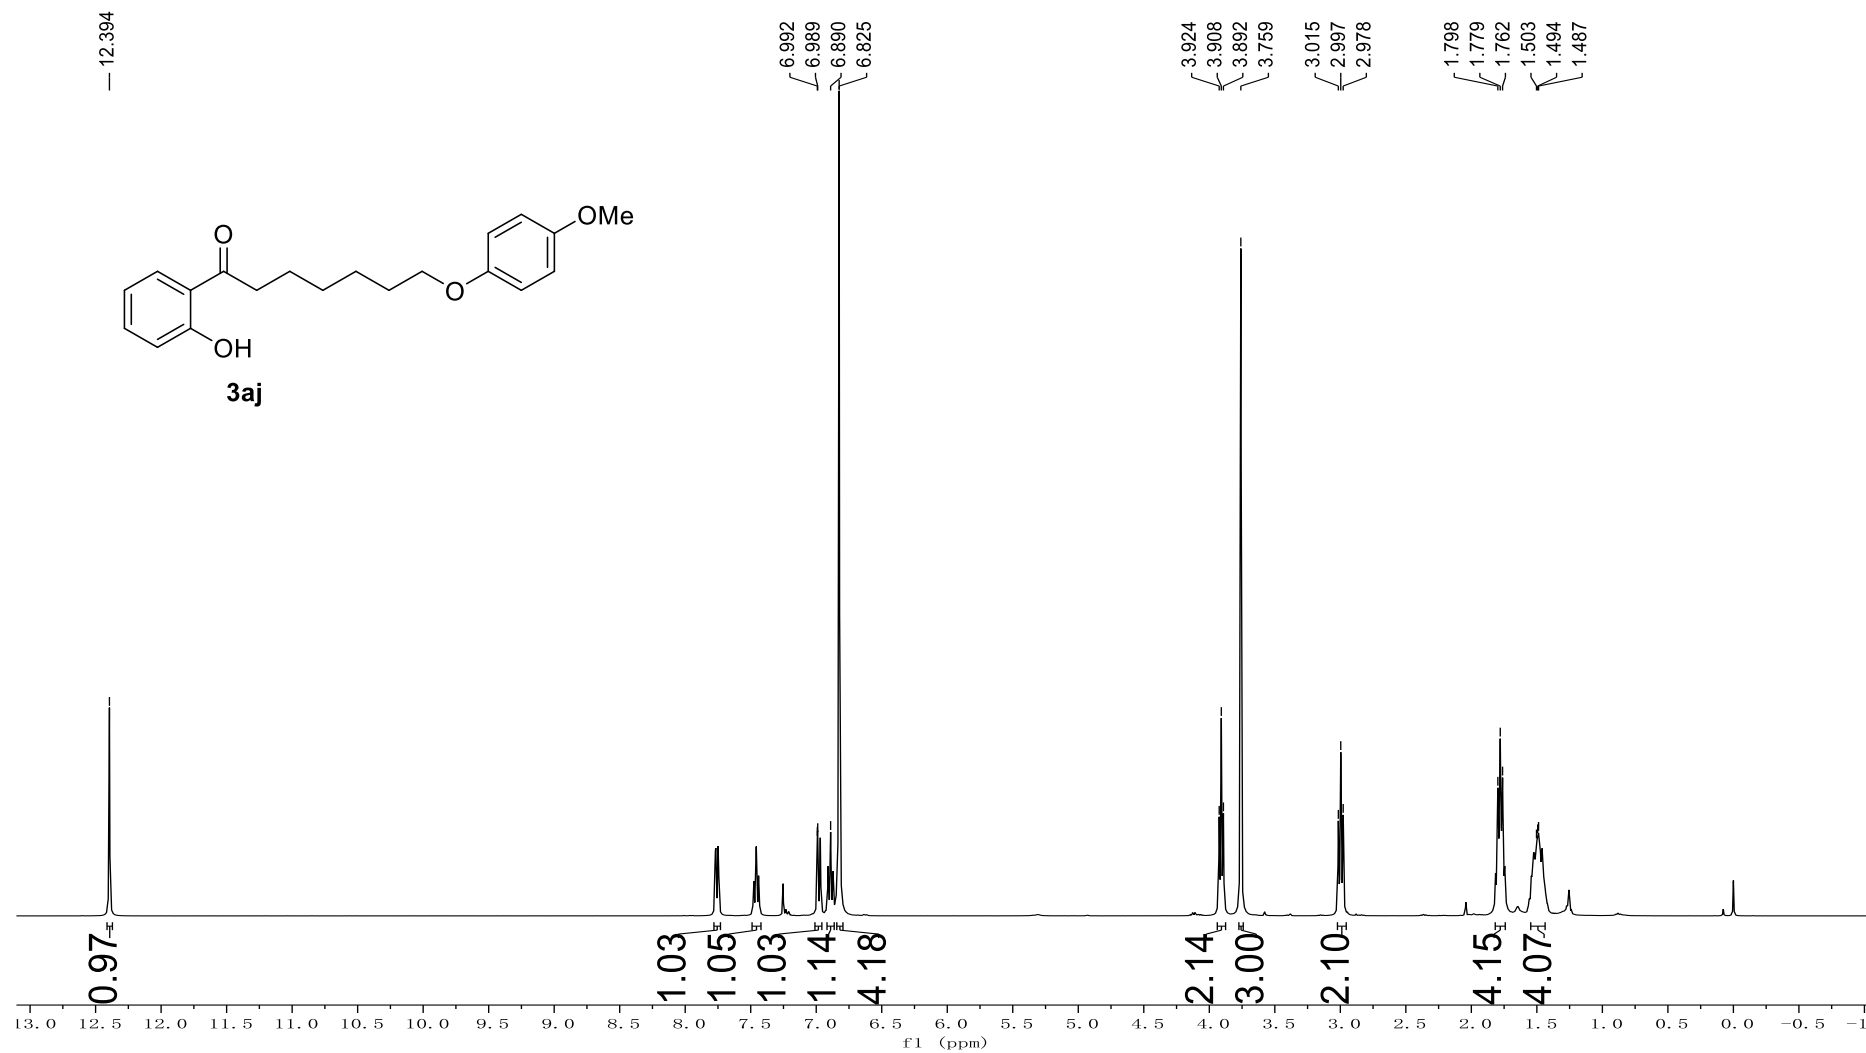

$^{13}\text{C}$  NMR-spectrum (101 MHz,  $\text{CDCl}_3$ ) of **3aj**

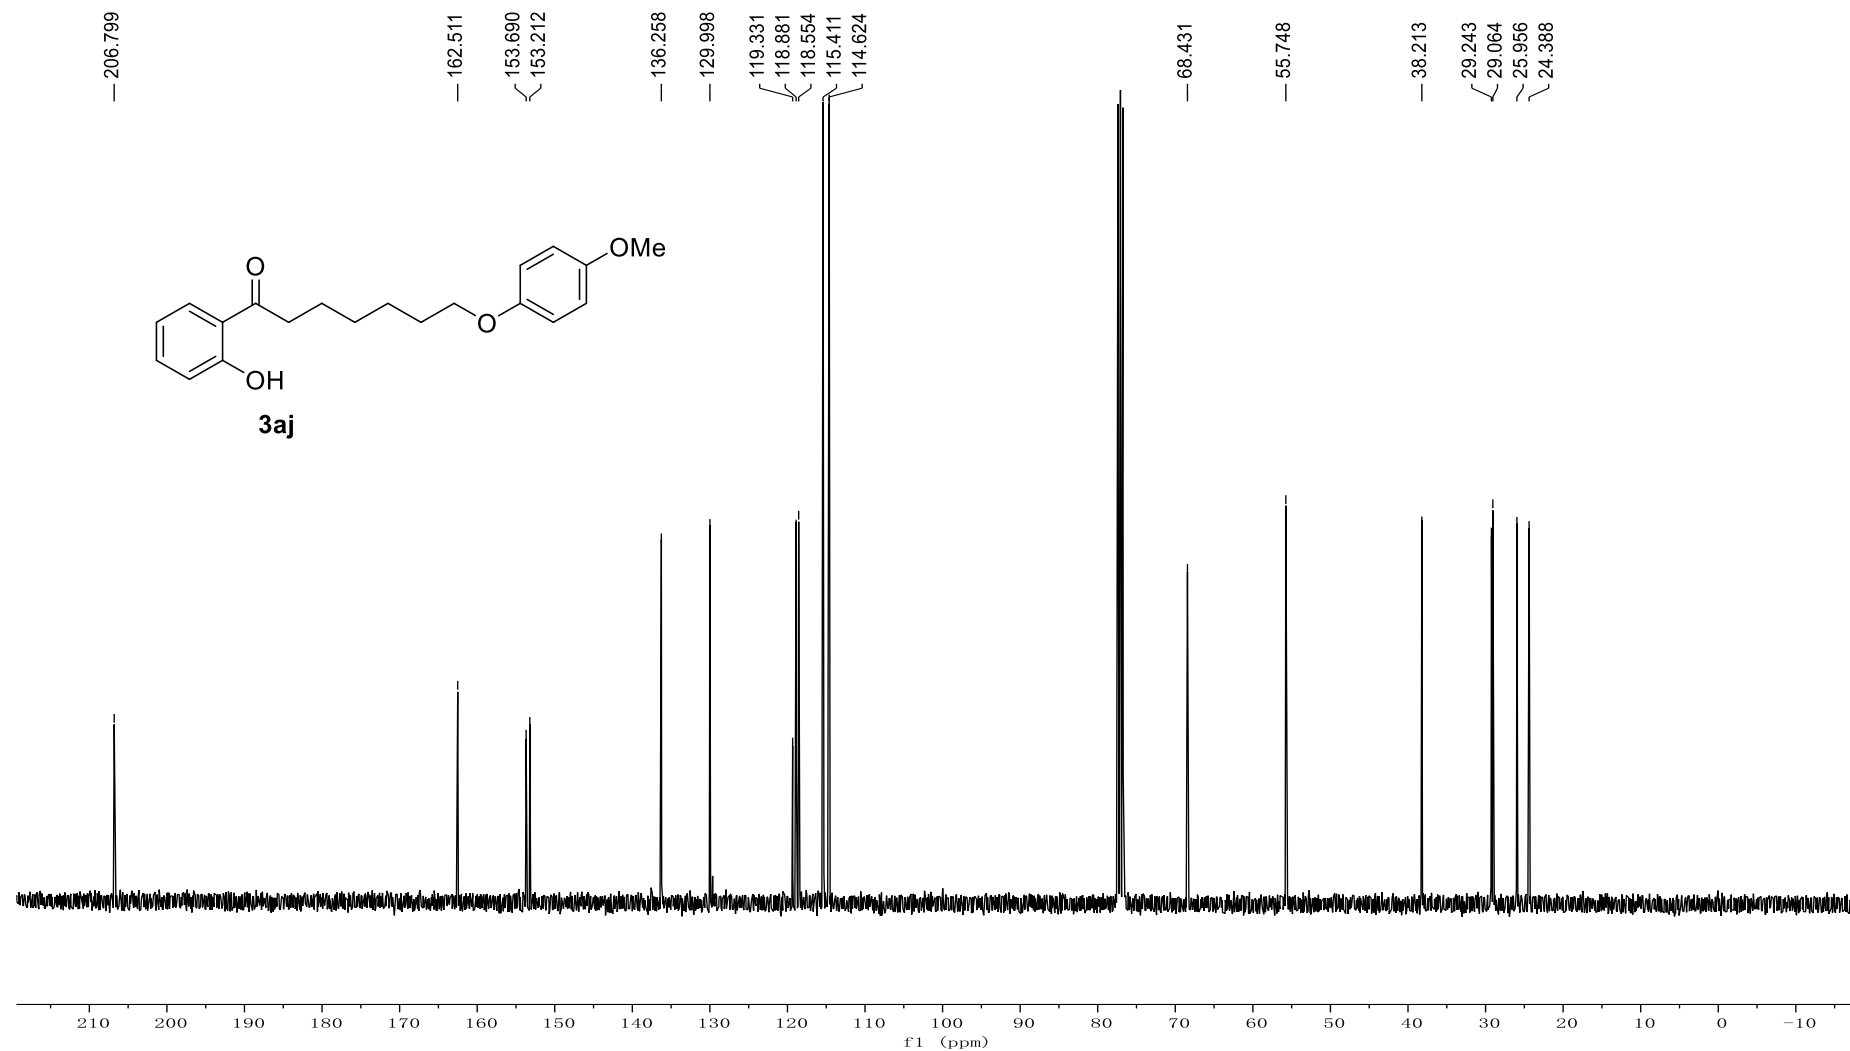

<sup>1</sup>H NMR-spectrum (400 MHz, CDCl<sub>3</sub>) of **3ak**

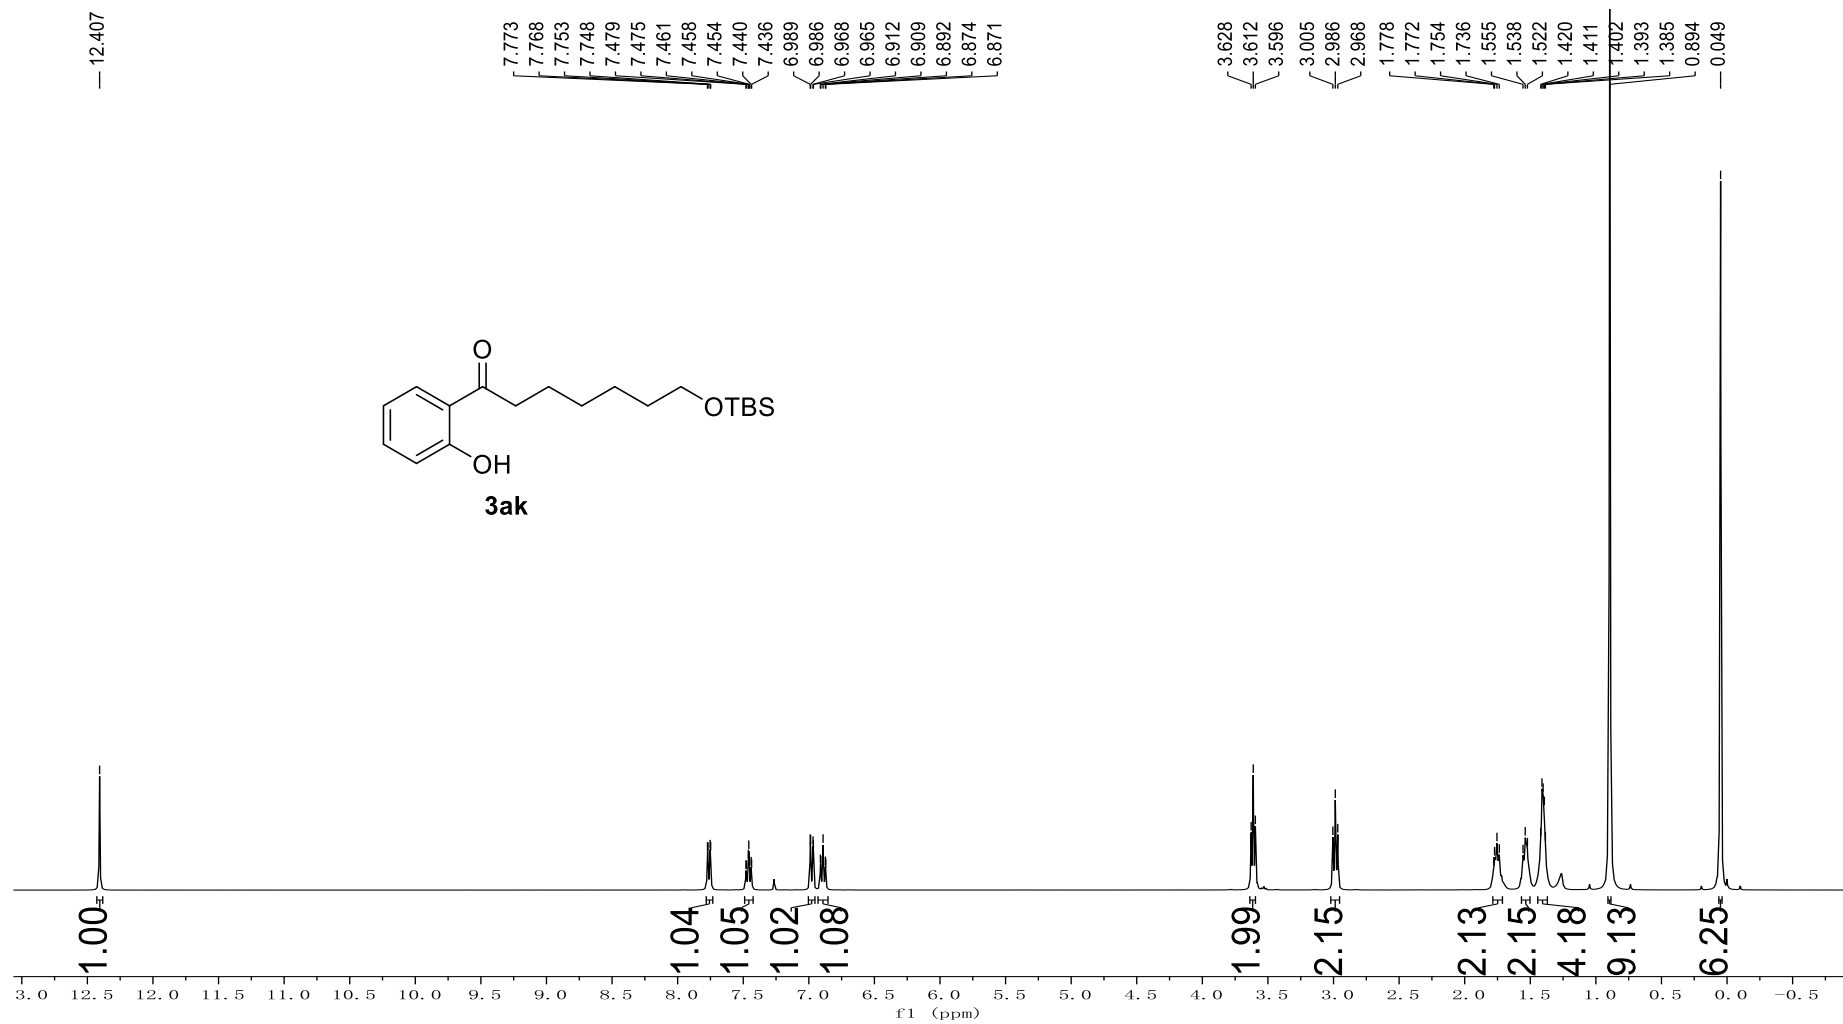

$^{13}\text{C}$  NMR-spectrum (101 MHz,  $\text{CDCl}_3$ ) of **3ak**

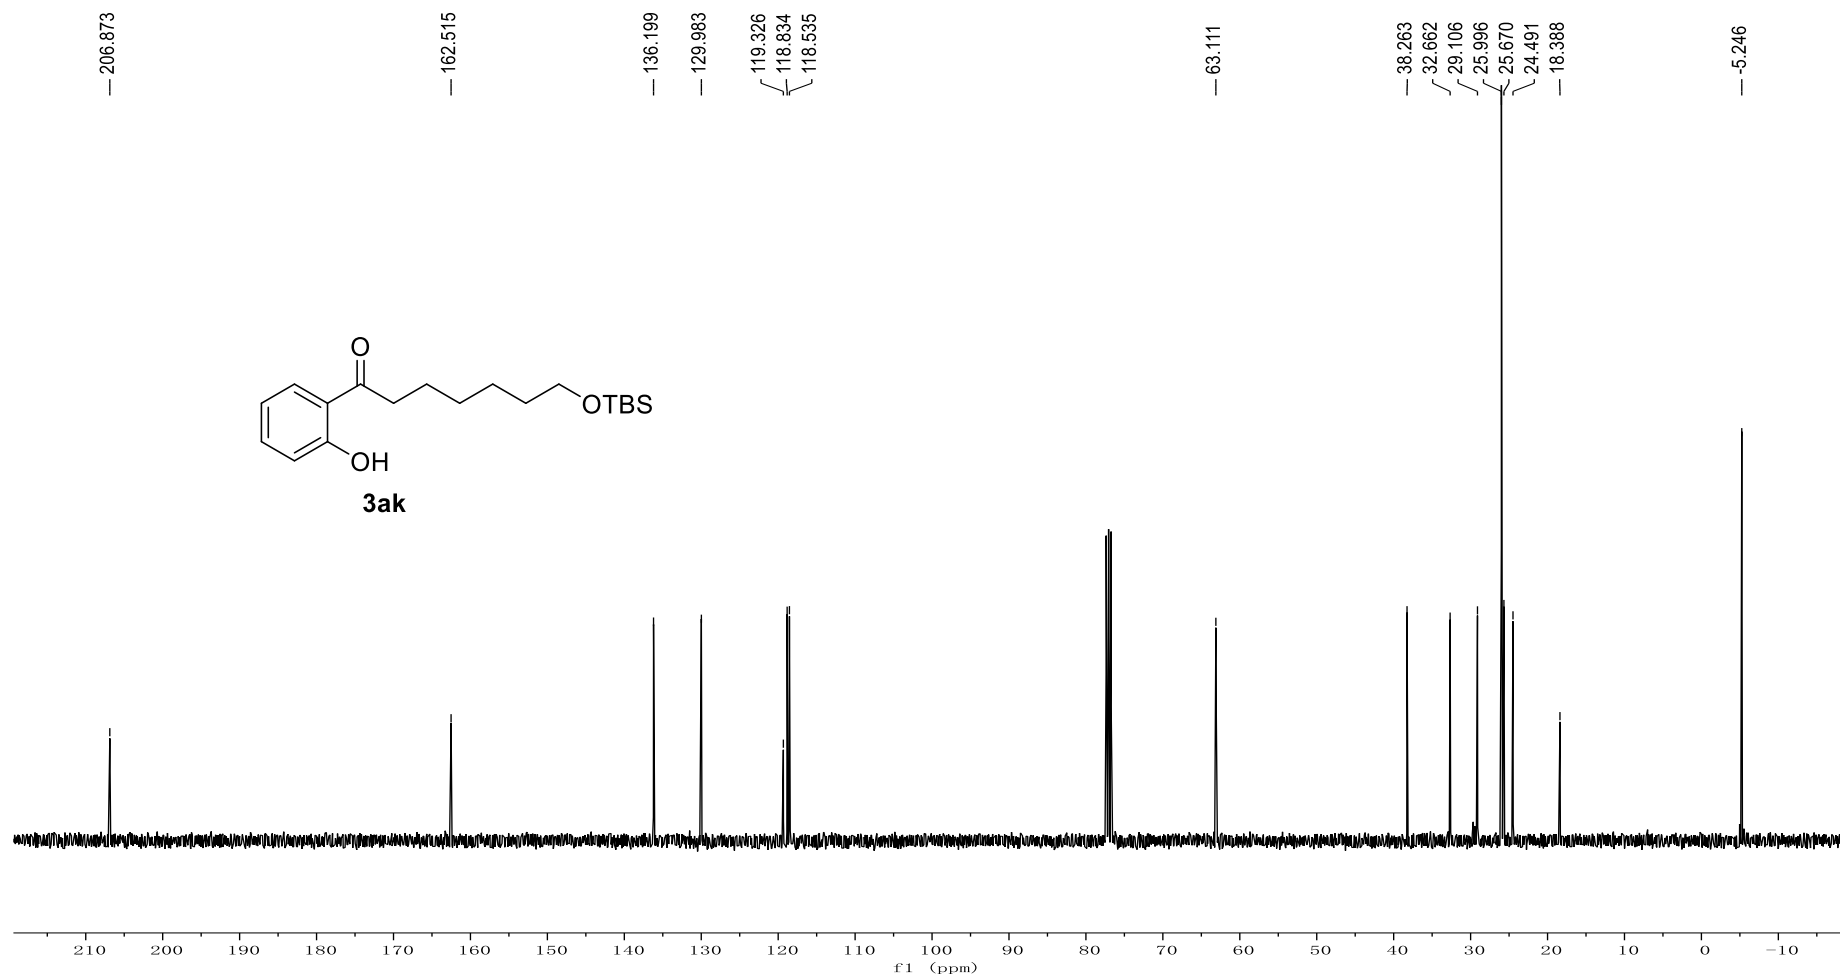

$^1\text{H}$  NMR-spectrum (400 MHz,  $\text{CDCl}_3$ ) of **3al**

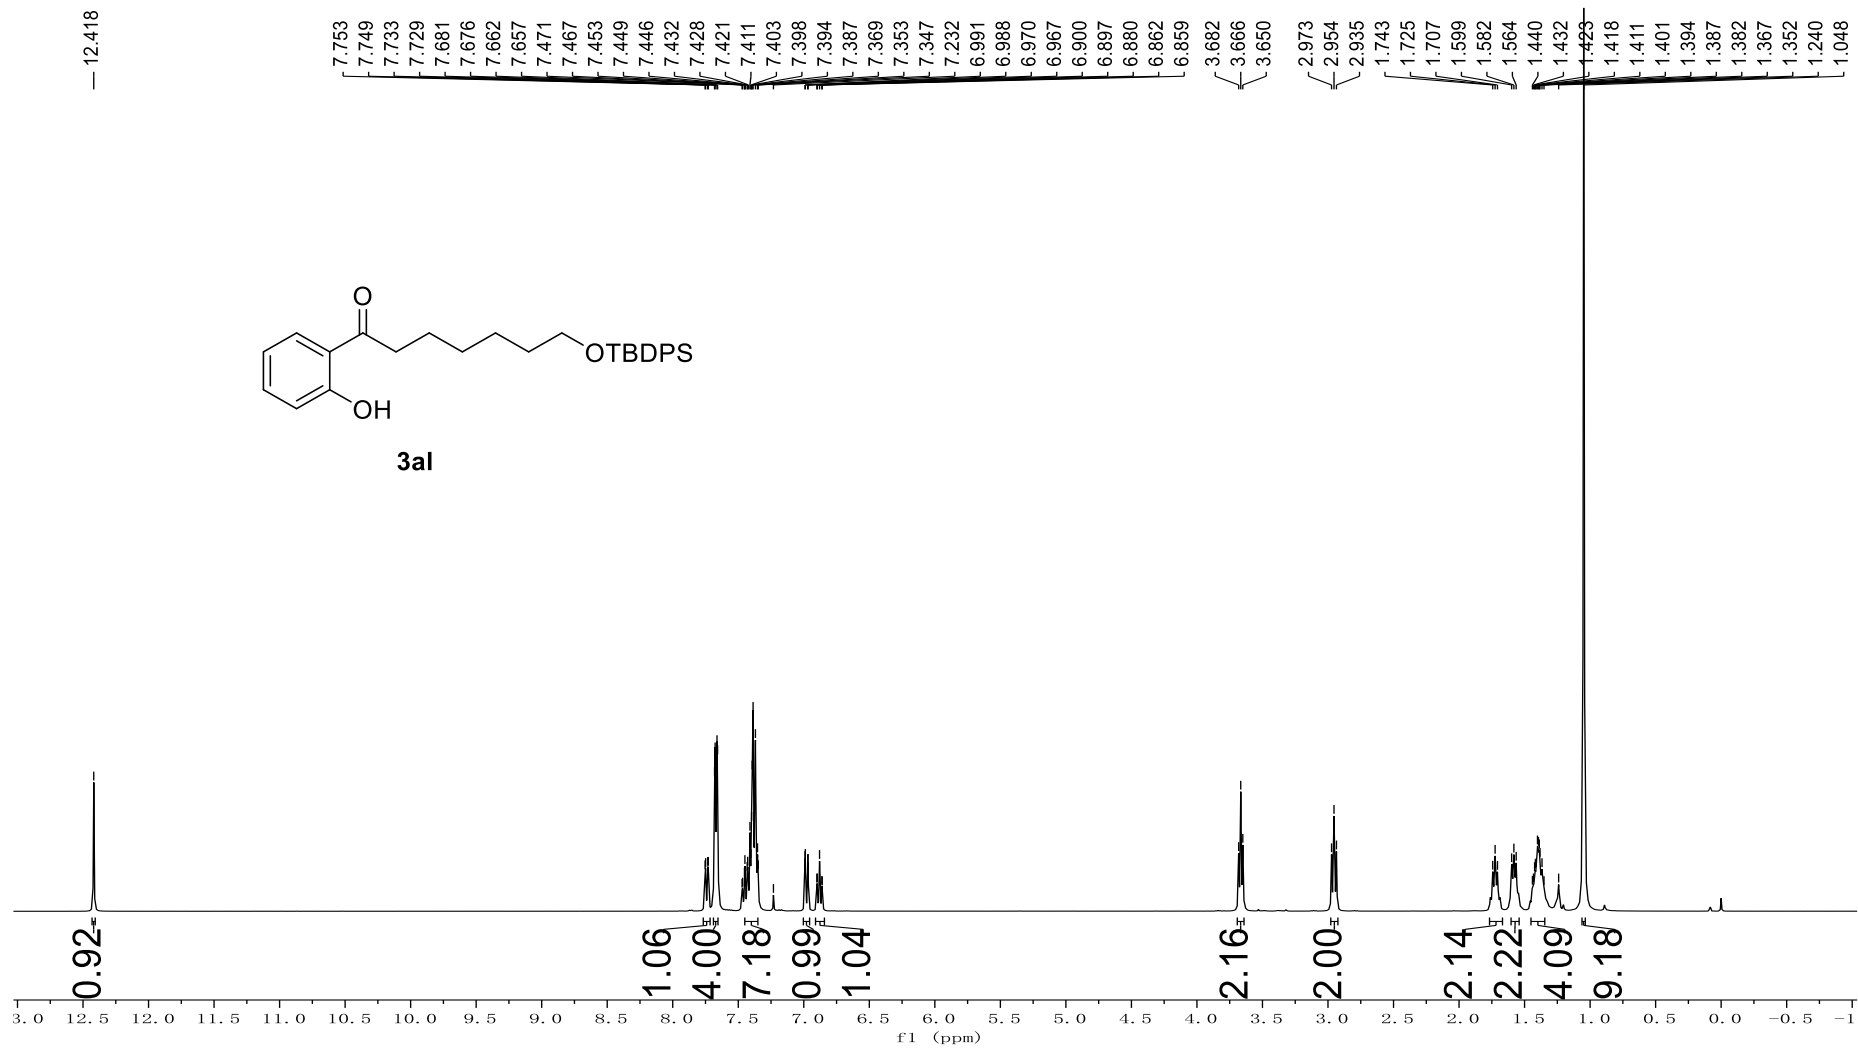

$^{13}\text{C}$  NMR-spectrum (101 MHz,  $\text{CDCl}_3$ ) of **3al**

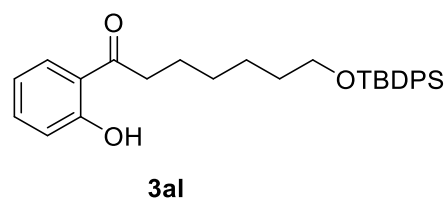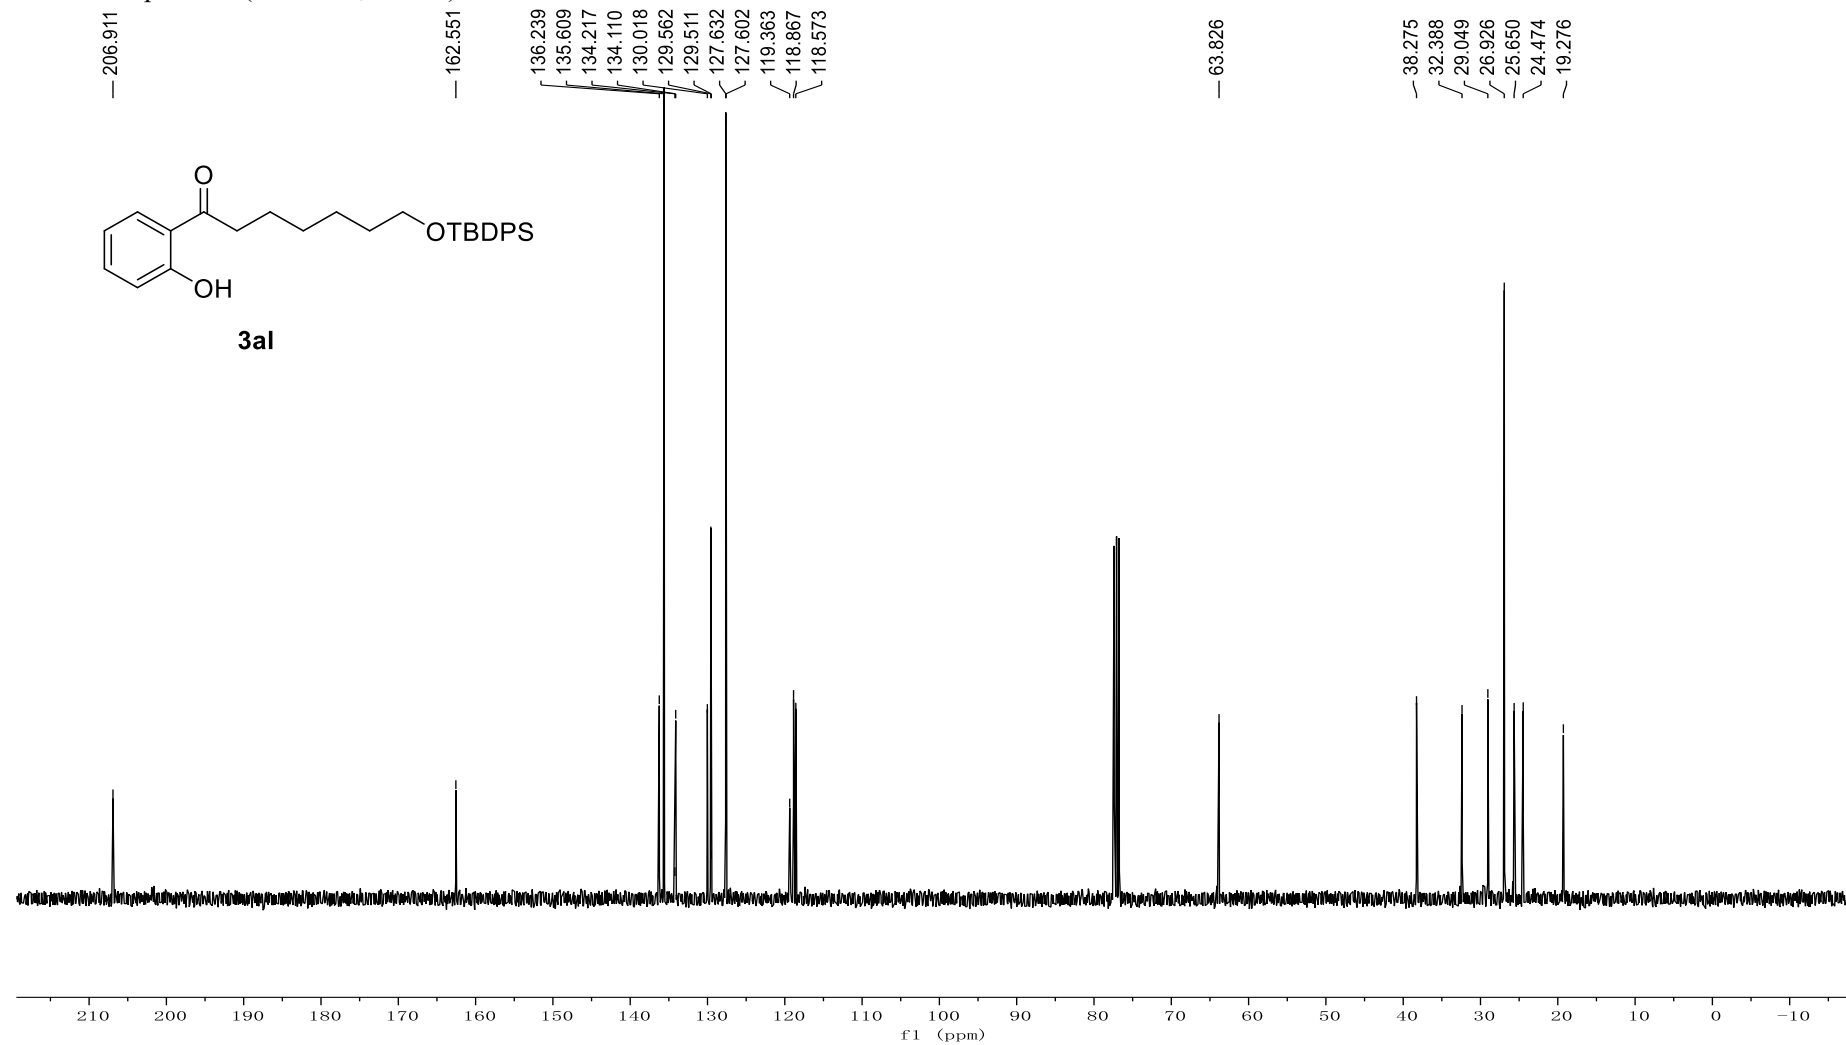

<sup>1</sup>H NMR-spectrum (400 MHz, CDCl<sub>3</sub>) of **3am**

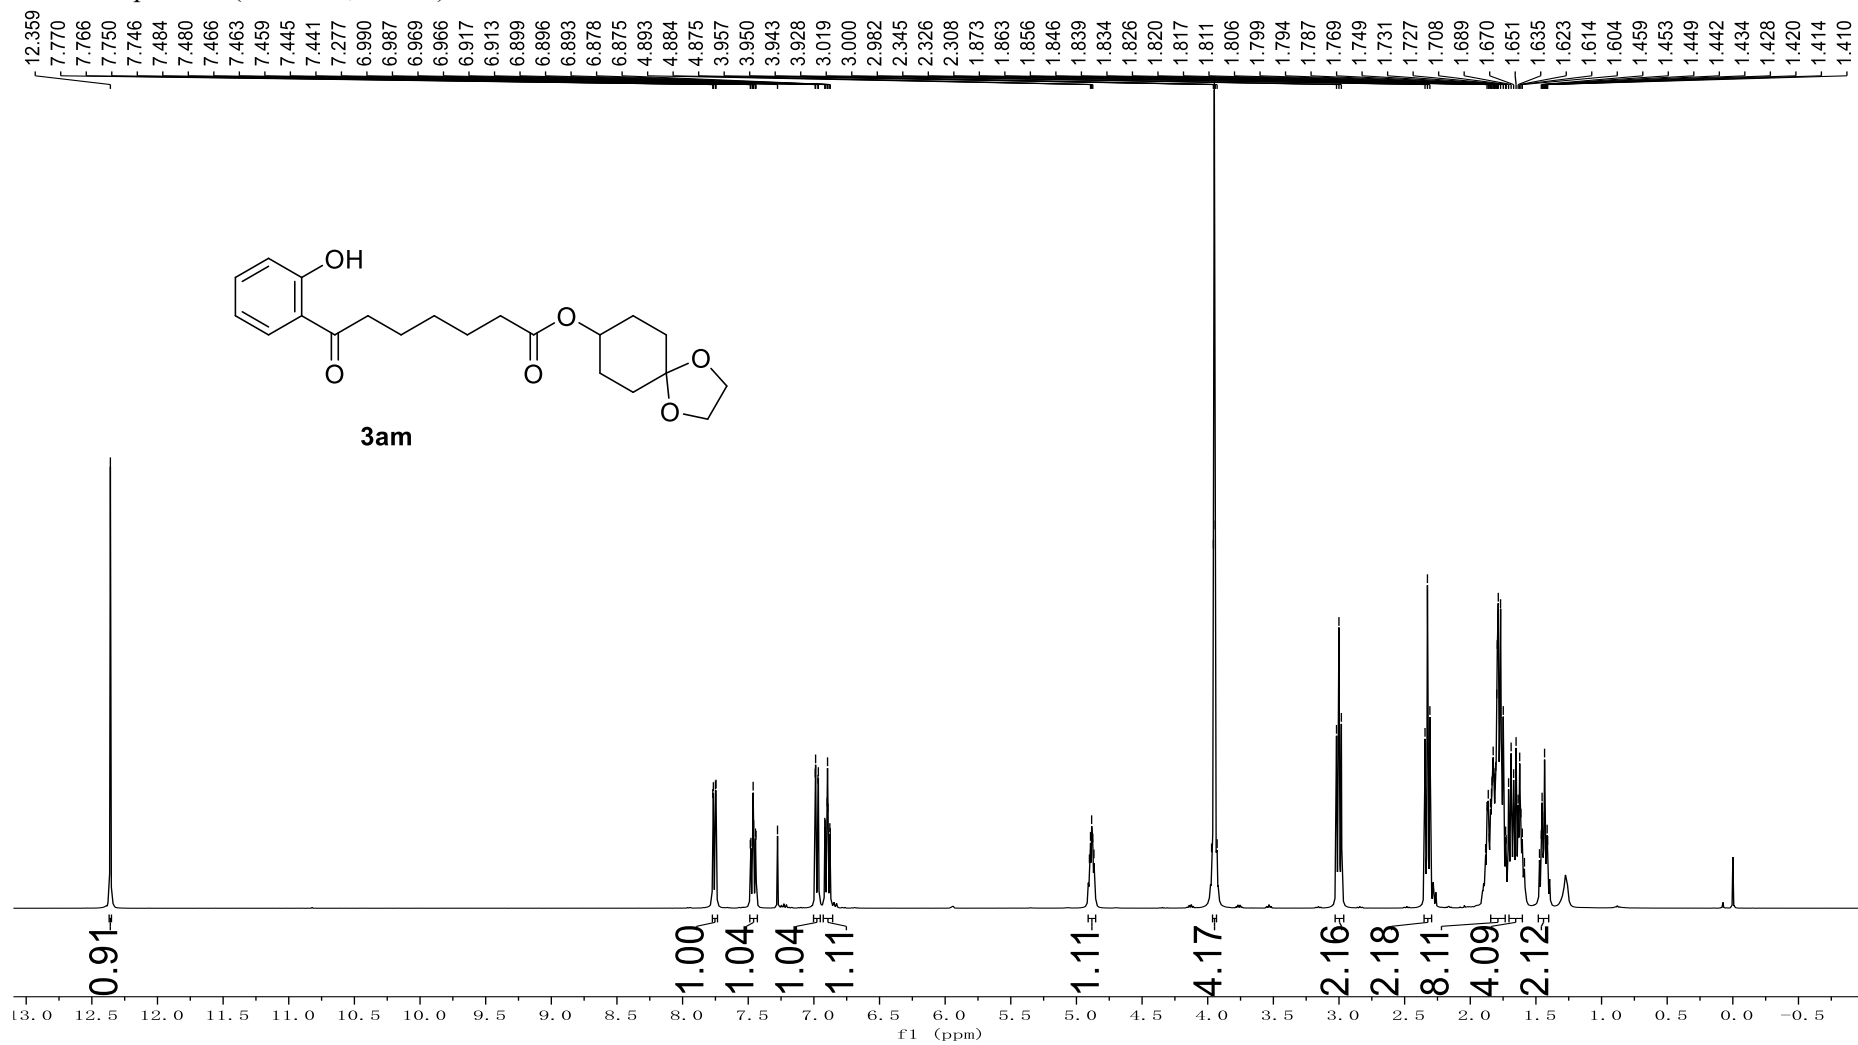

$^{13}\text{C}$  NMR-spectrum (101 MHz,  $\text{CDCl}_3$ ) of **3am**

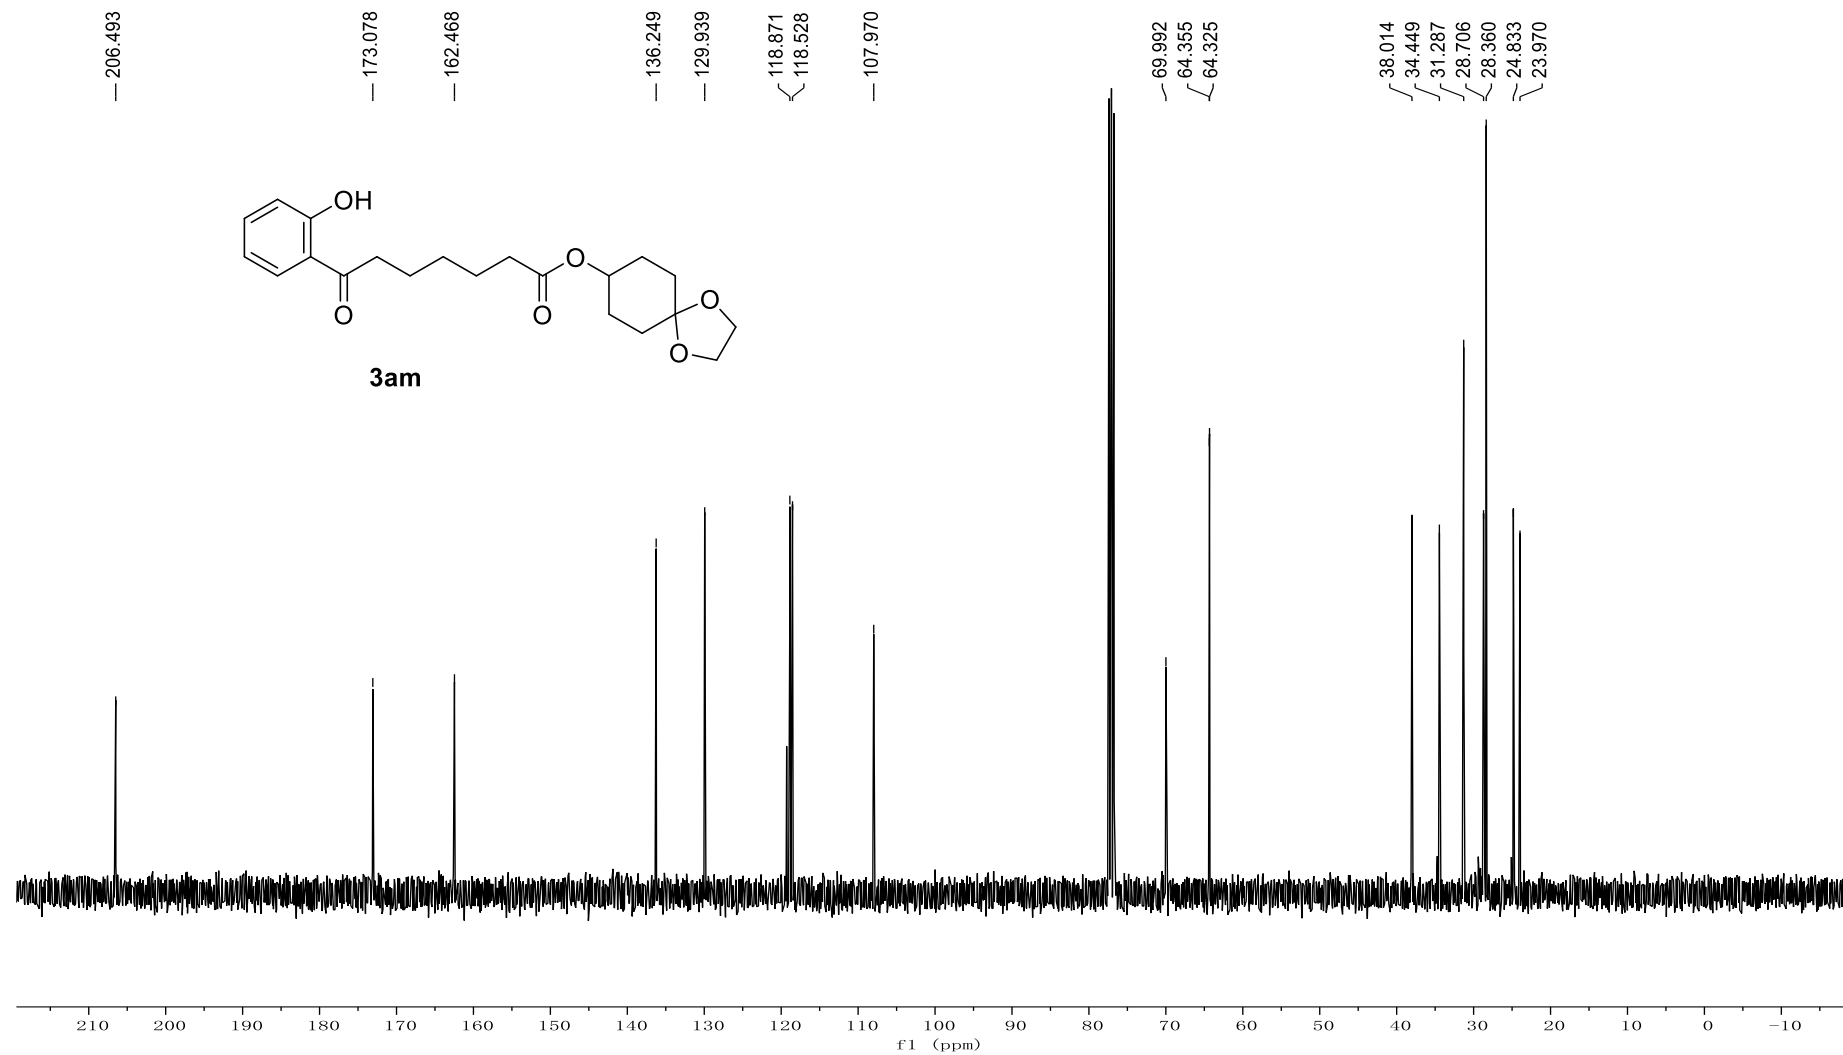



<sup>1</sup>H NMR-spectrum (500 MHz, CDCl<sub>3</sub>) of **3an**

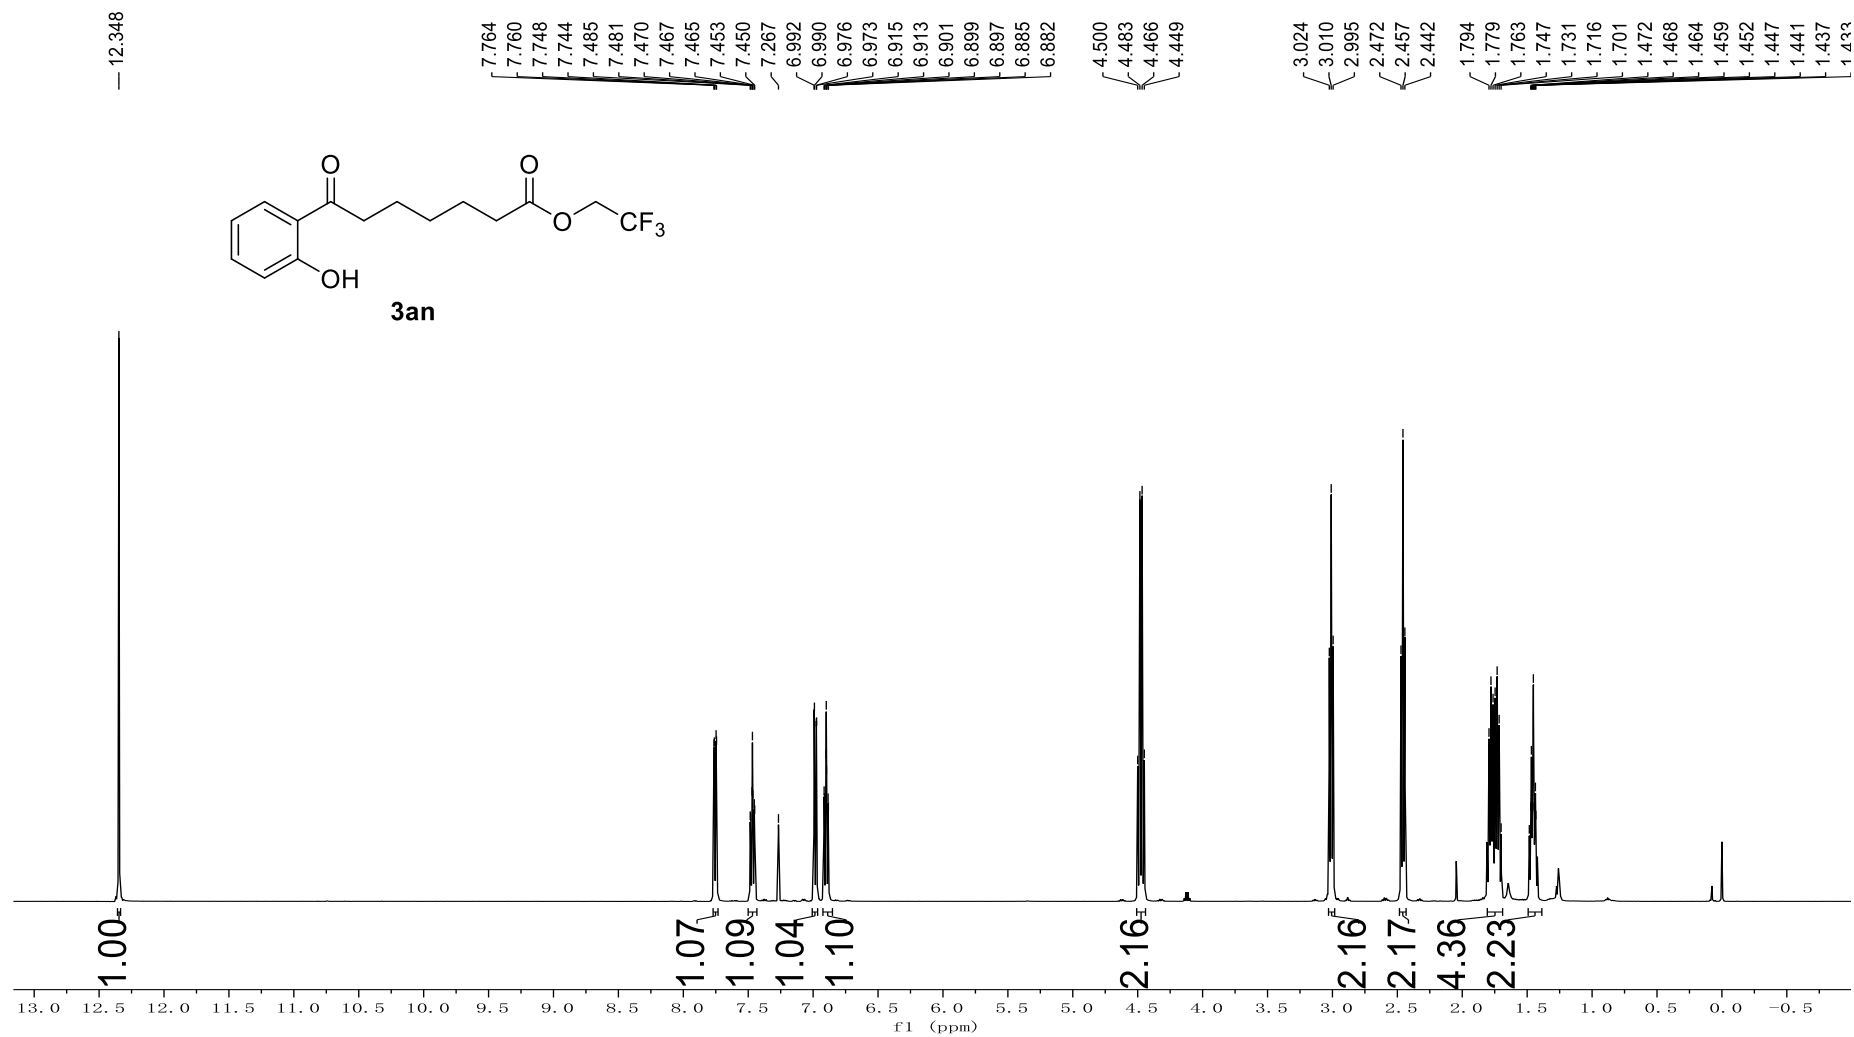

$^{13}\text{C}$  NMR-spectrum (126 MHz,  $\text{CDCl}_3$ ) of **3an**

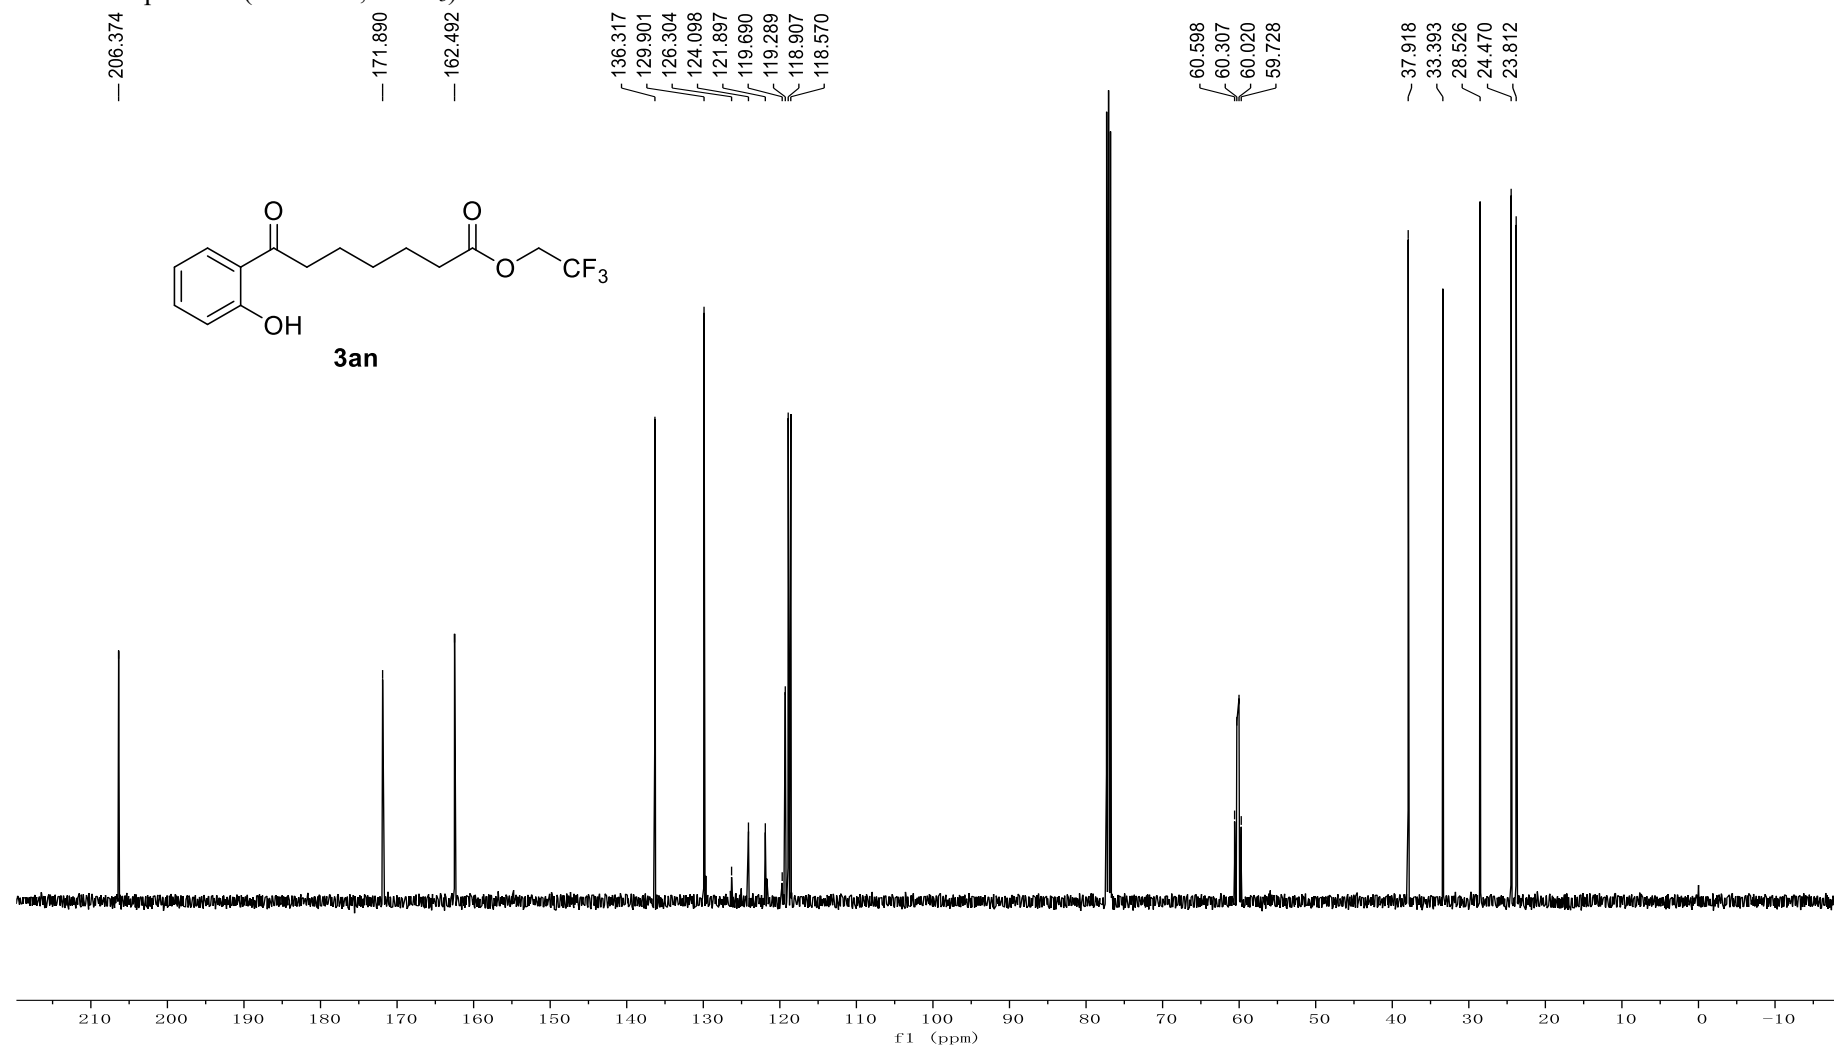

$^{19}\text{F}$  NMR-spectrum (376 MHz,  $\text{CDCl}_3$ ) of **3an**

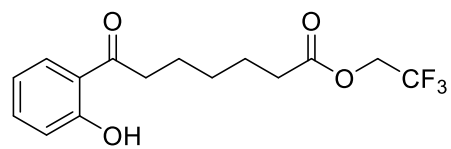

**3an**

-73.811  
-73.833  
-73.858

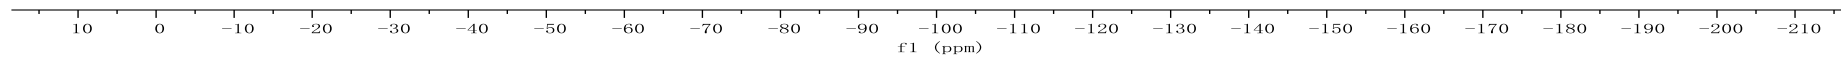

<sup>1</sup>H NMR-spectrum (500 MHz, CDCl<sub>3</sub>) of **3ao**

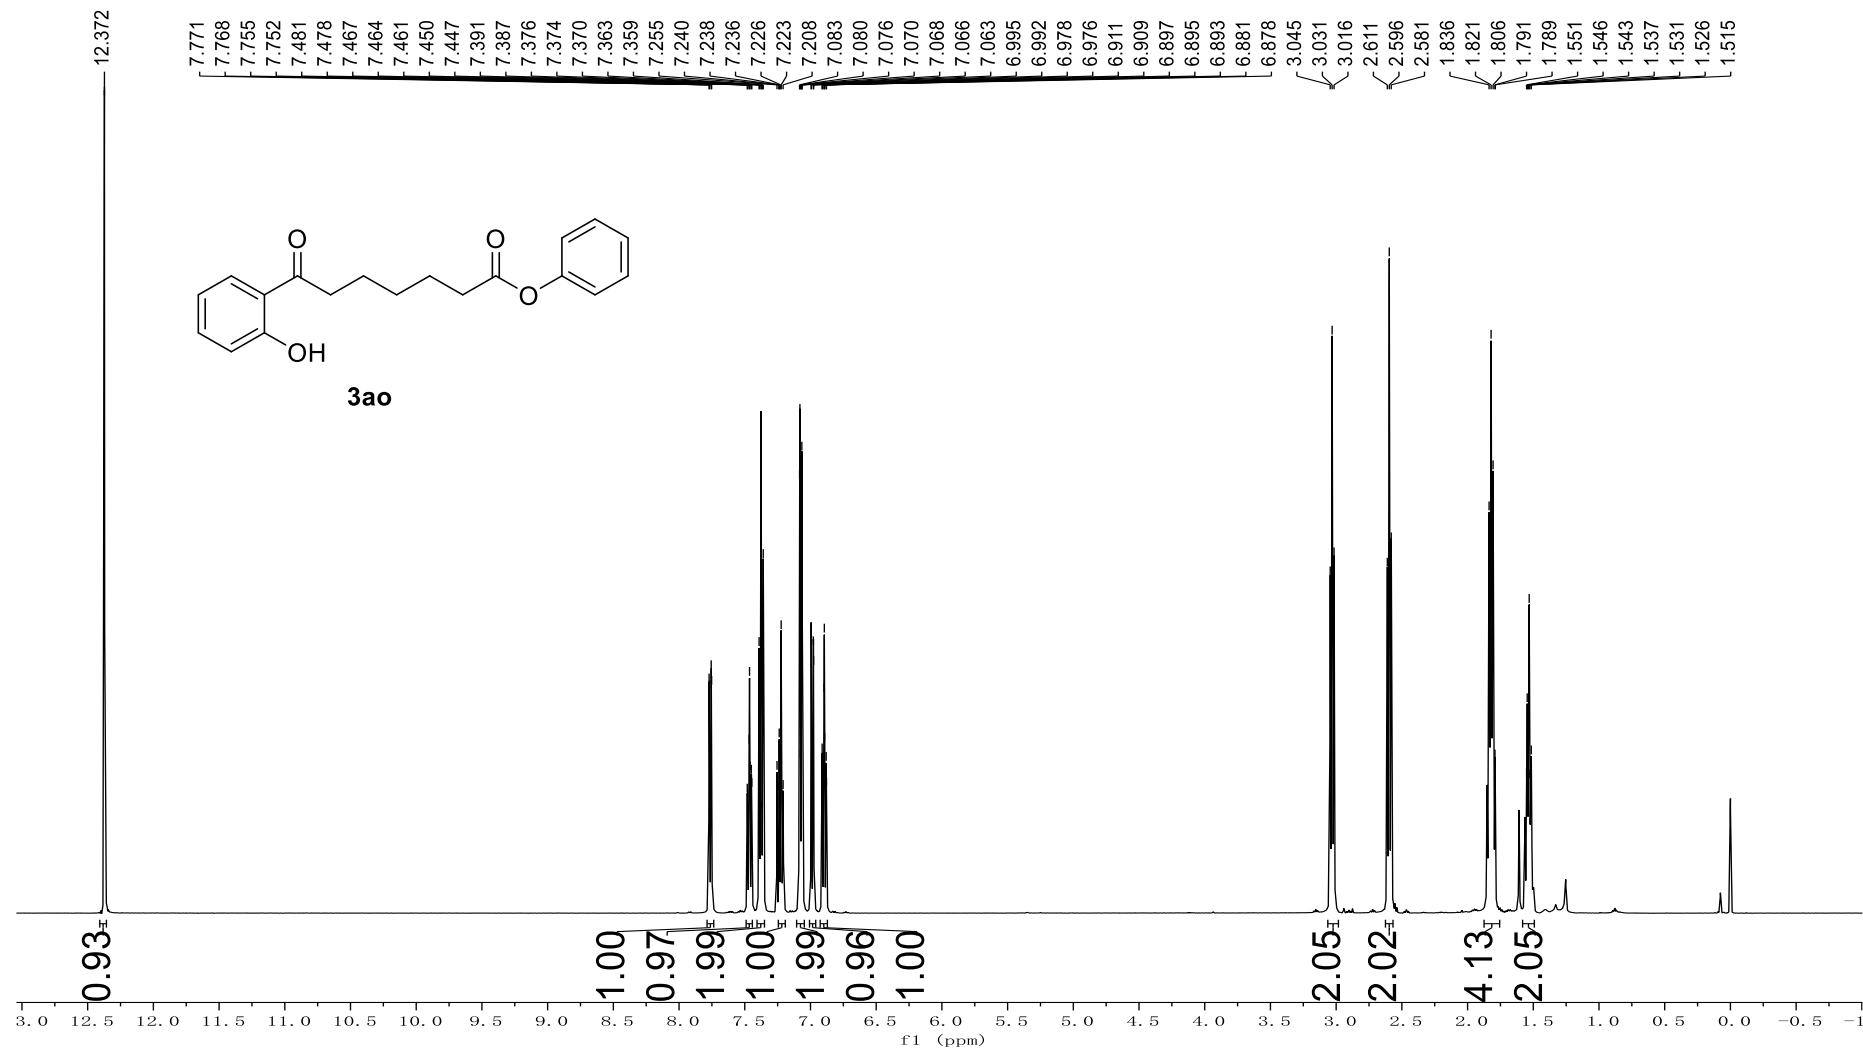

$^{13}\text{C}$  NMR-spectrum (126 MHz,  $\text{CDCl}_3$ ) of **3ao**

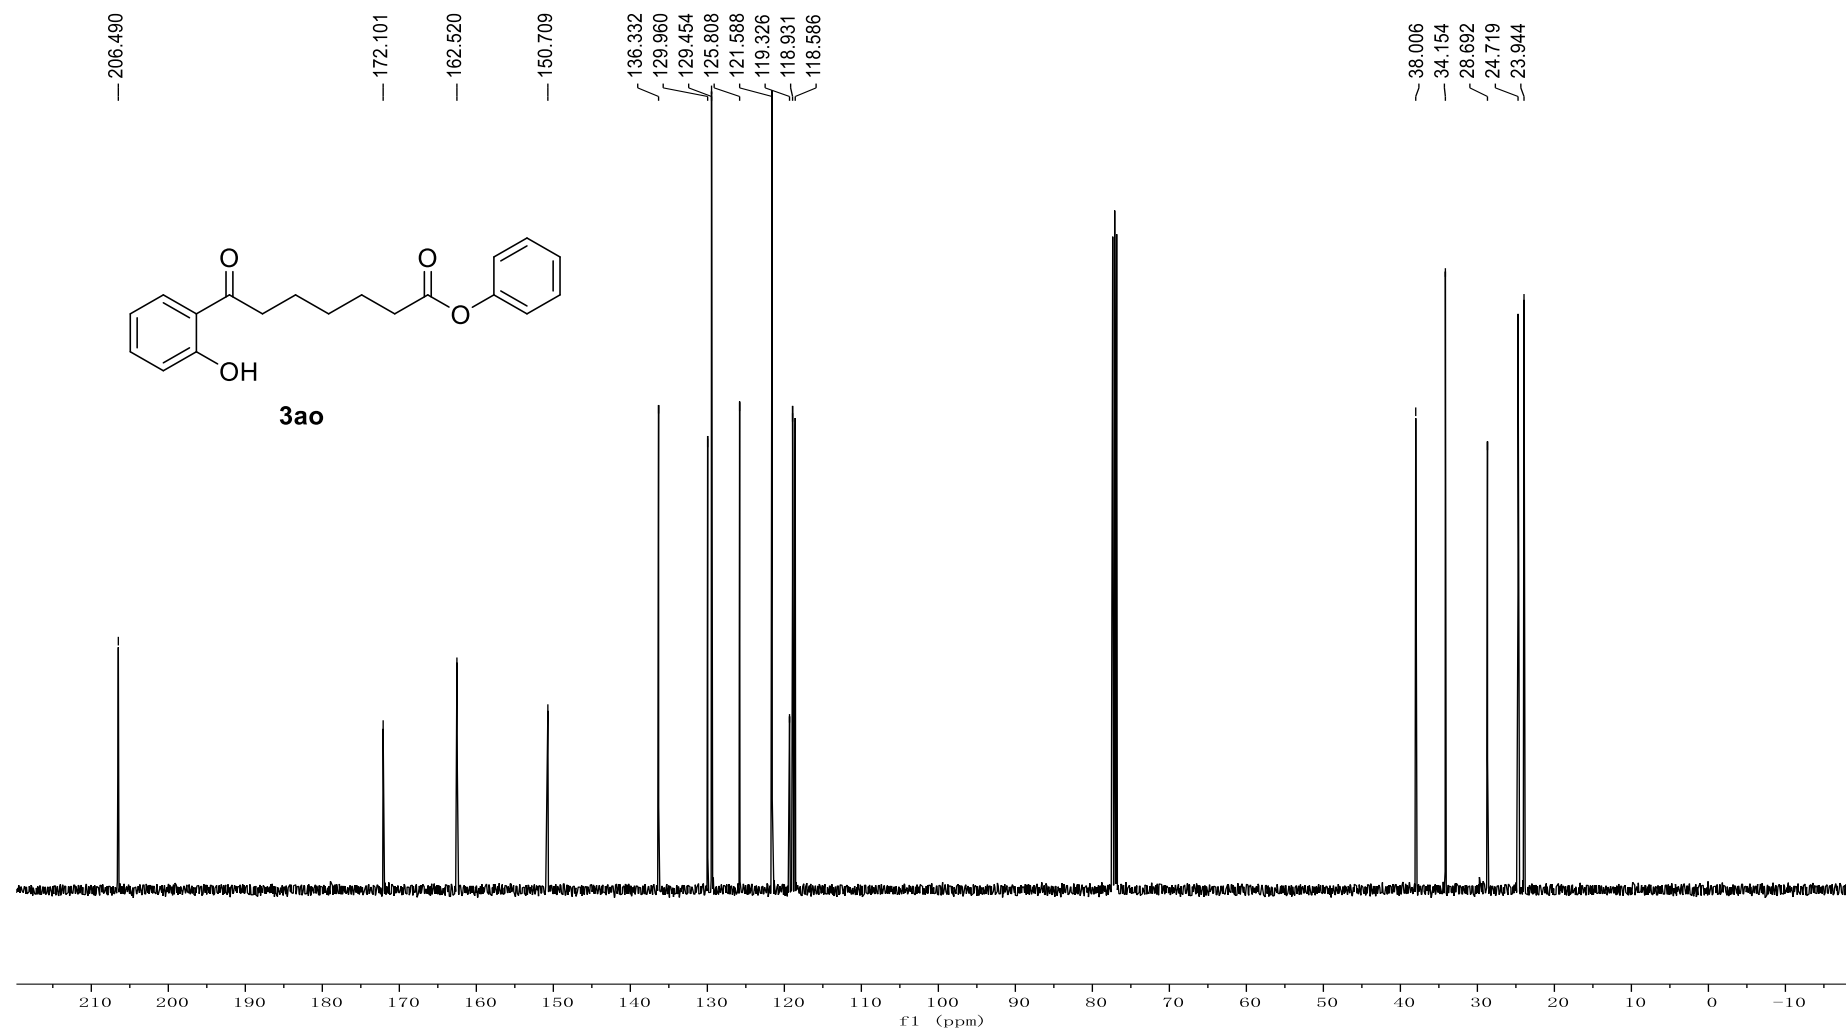

<sup>1</sup>H NMR-spectrum (400 MHz, CDCl<sub>3</sub>) of **3ap**

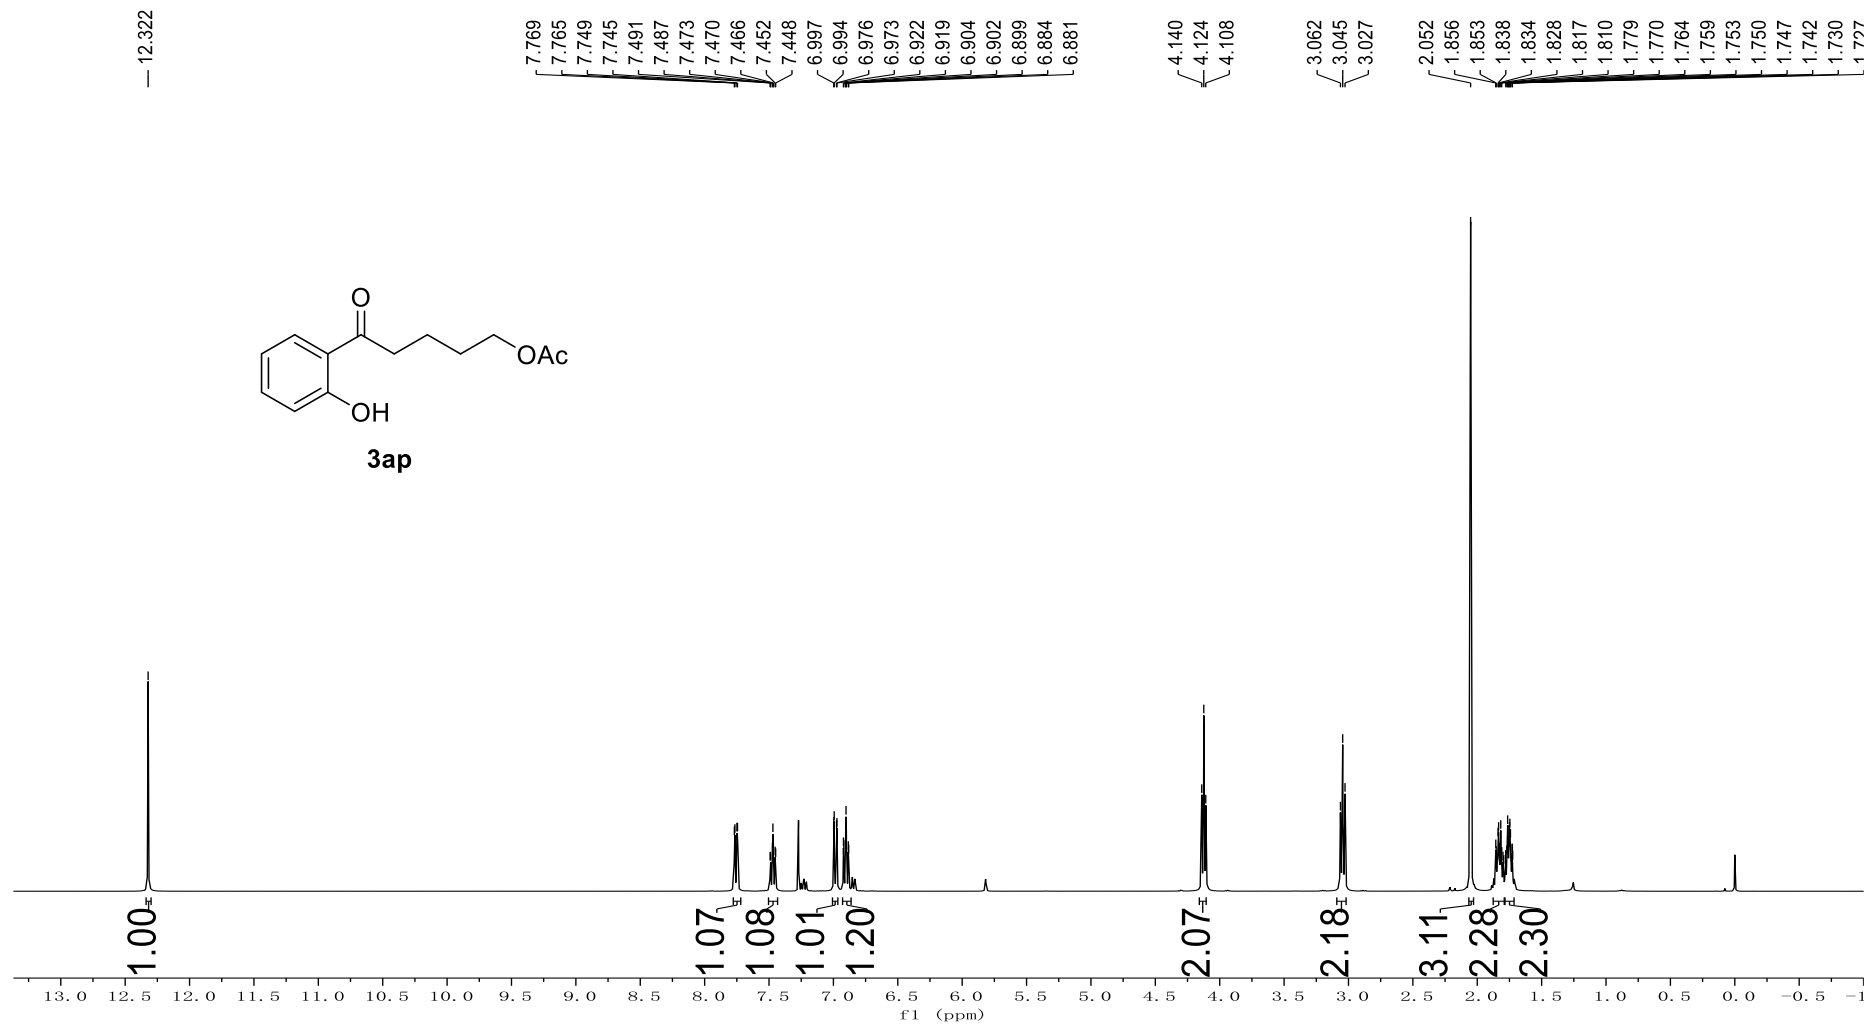

$^{13}\text{C}$  NMR-spectrum (101 MHz,  $\text{CDCl}_3$ ) of **3ap**

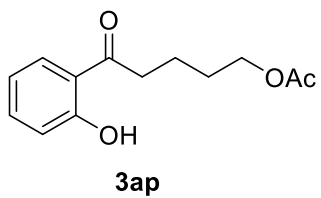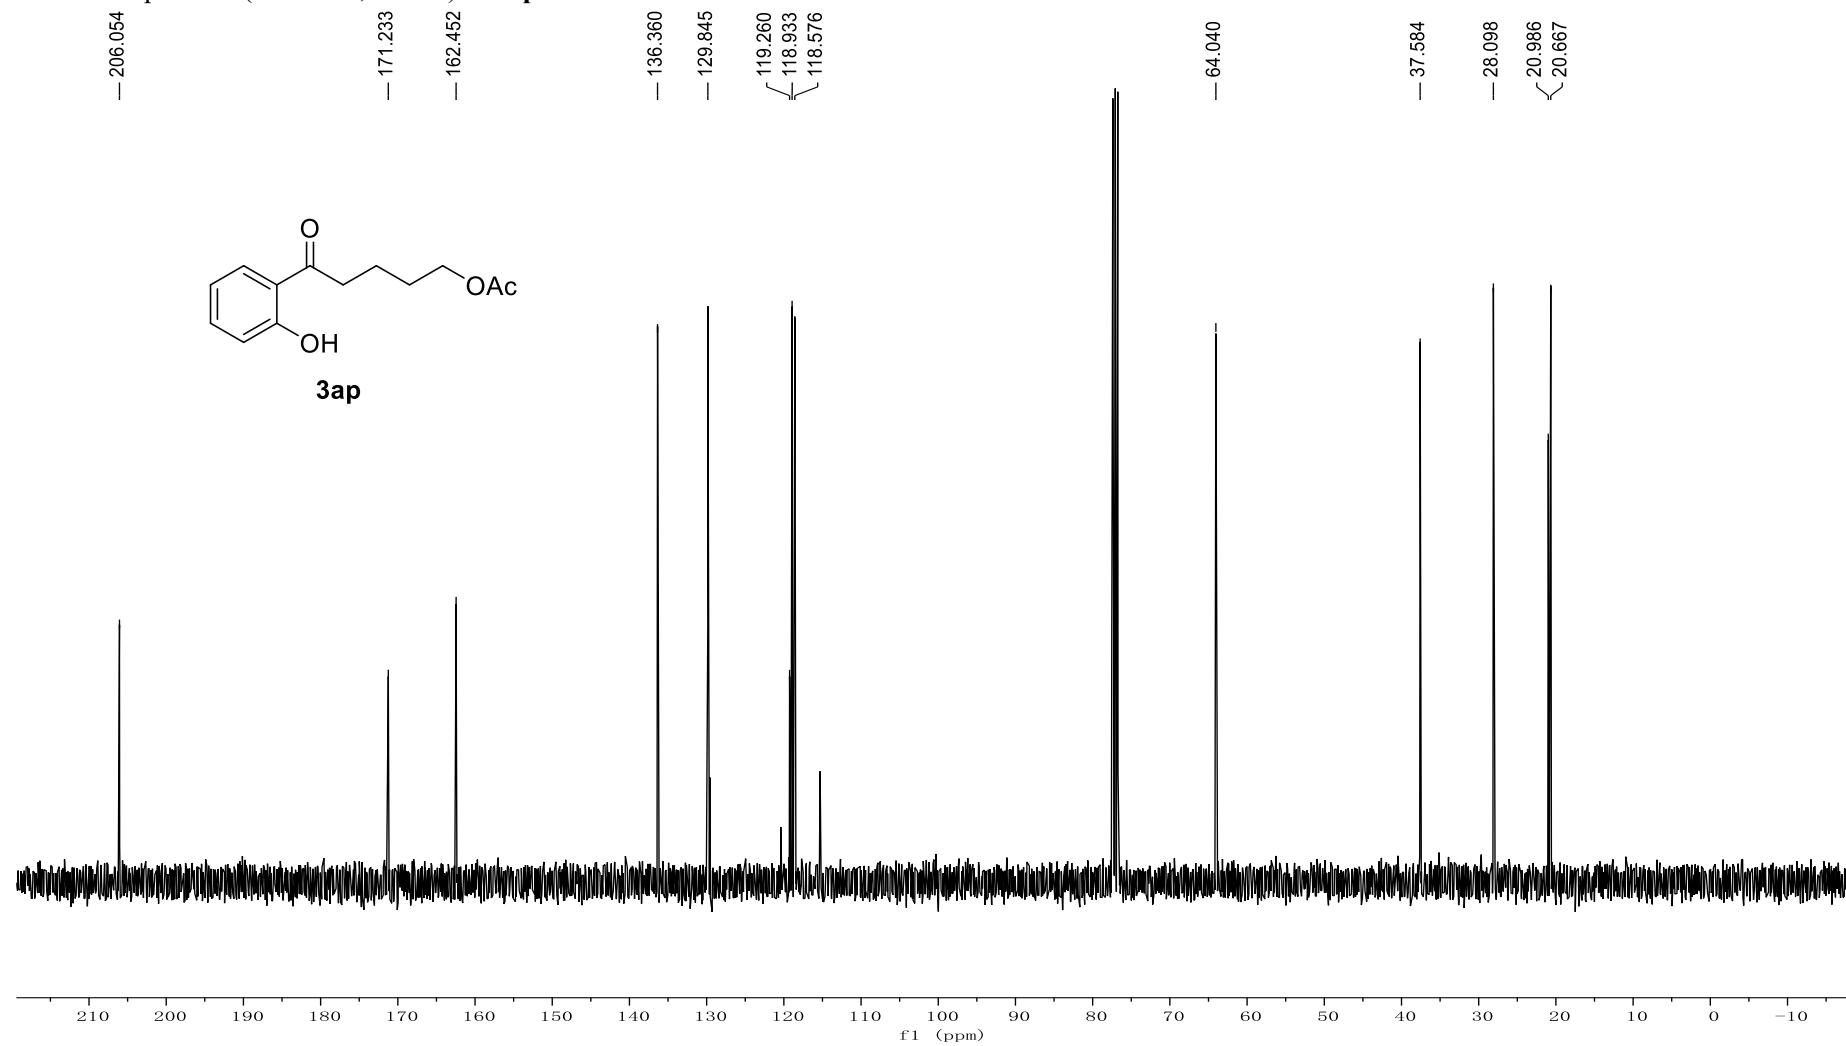

$^1\text{H}$  NMR-spectrum (400 MHz,  $\text{CDCl}_3$ ) of **3aq**

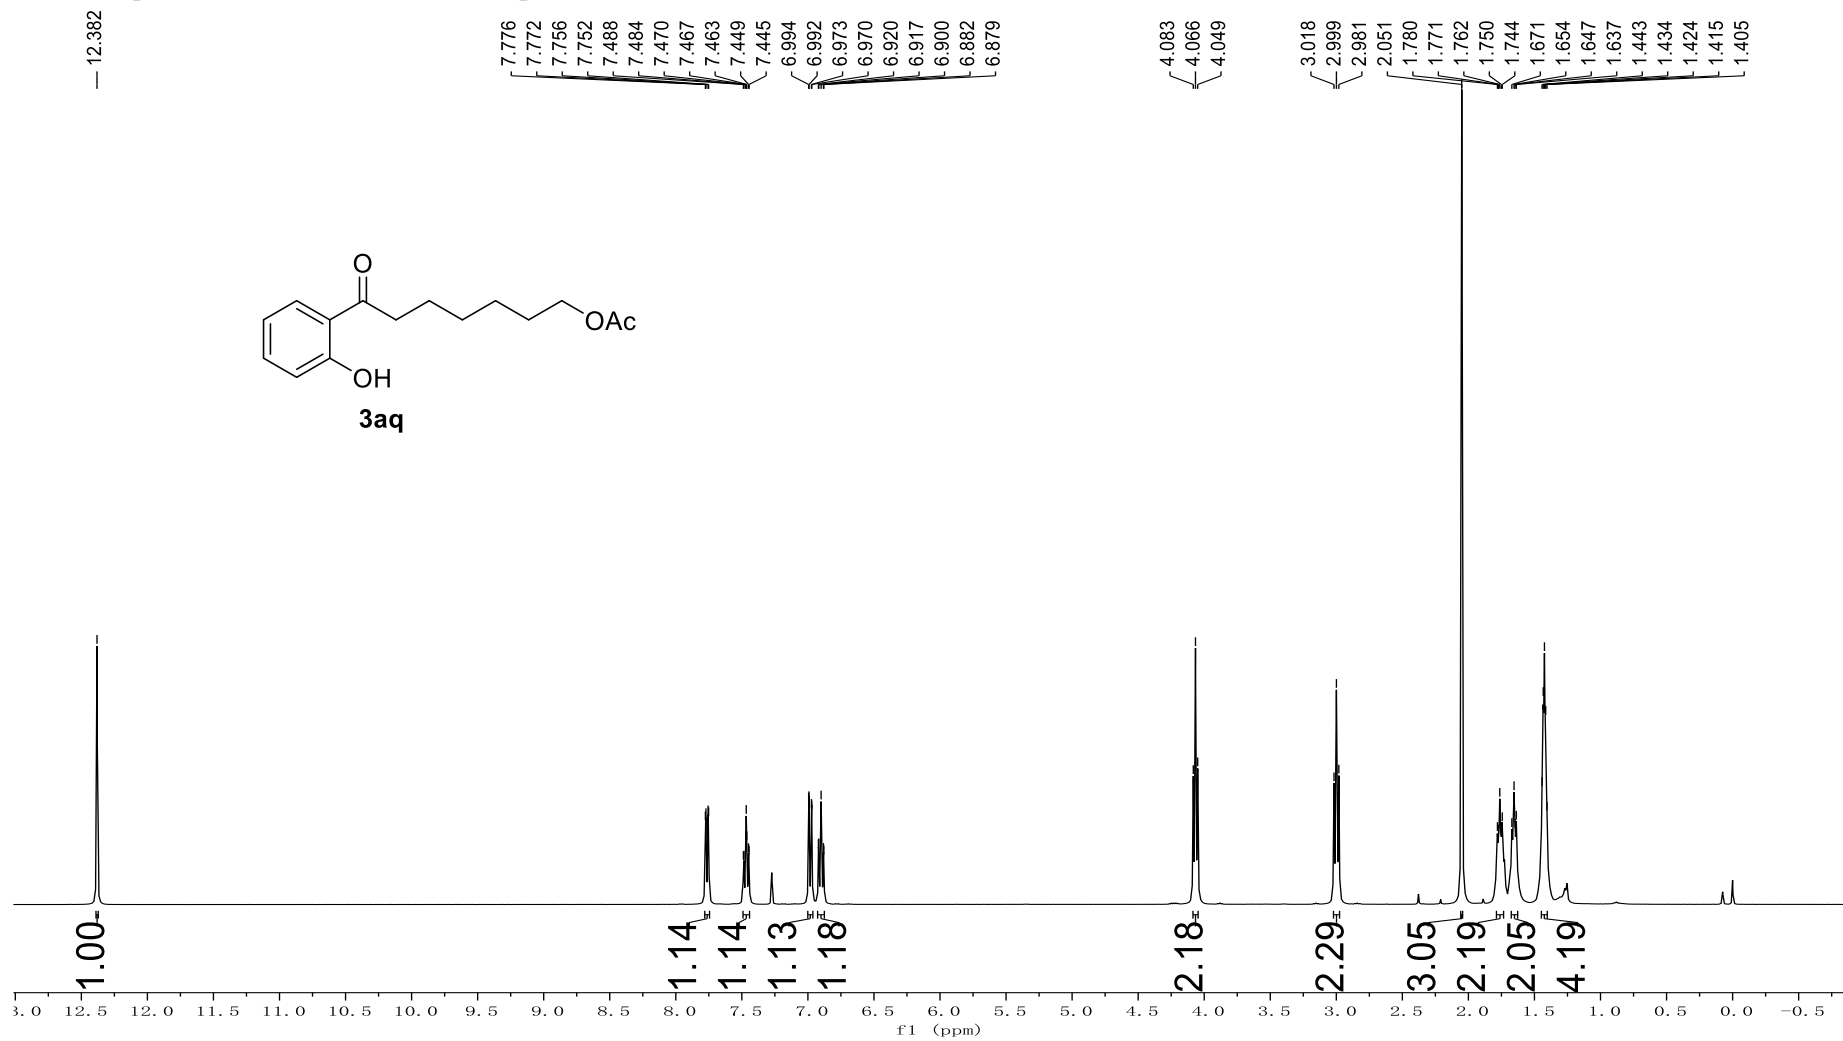



$^{13}\text{C}$  NMR-spectrum (101 MHz,  $\text{CDCl}_3$ ) of **3aq**

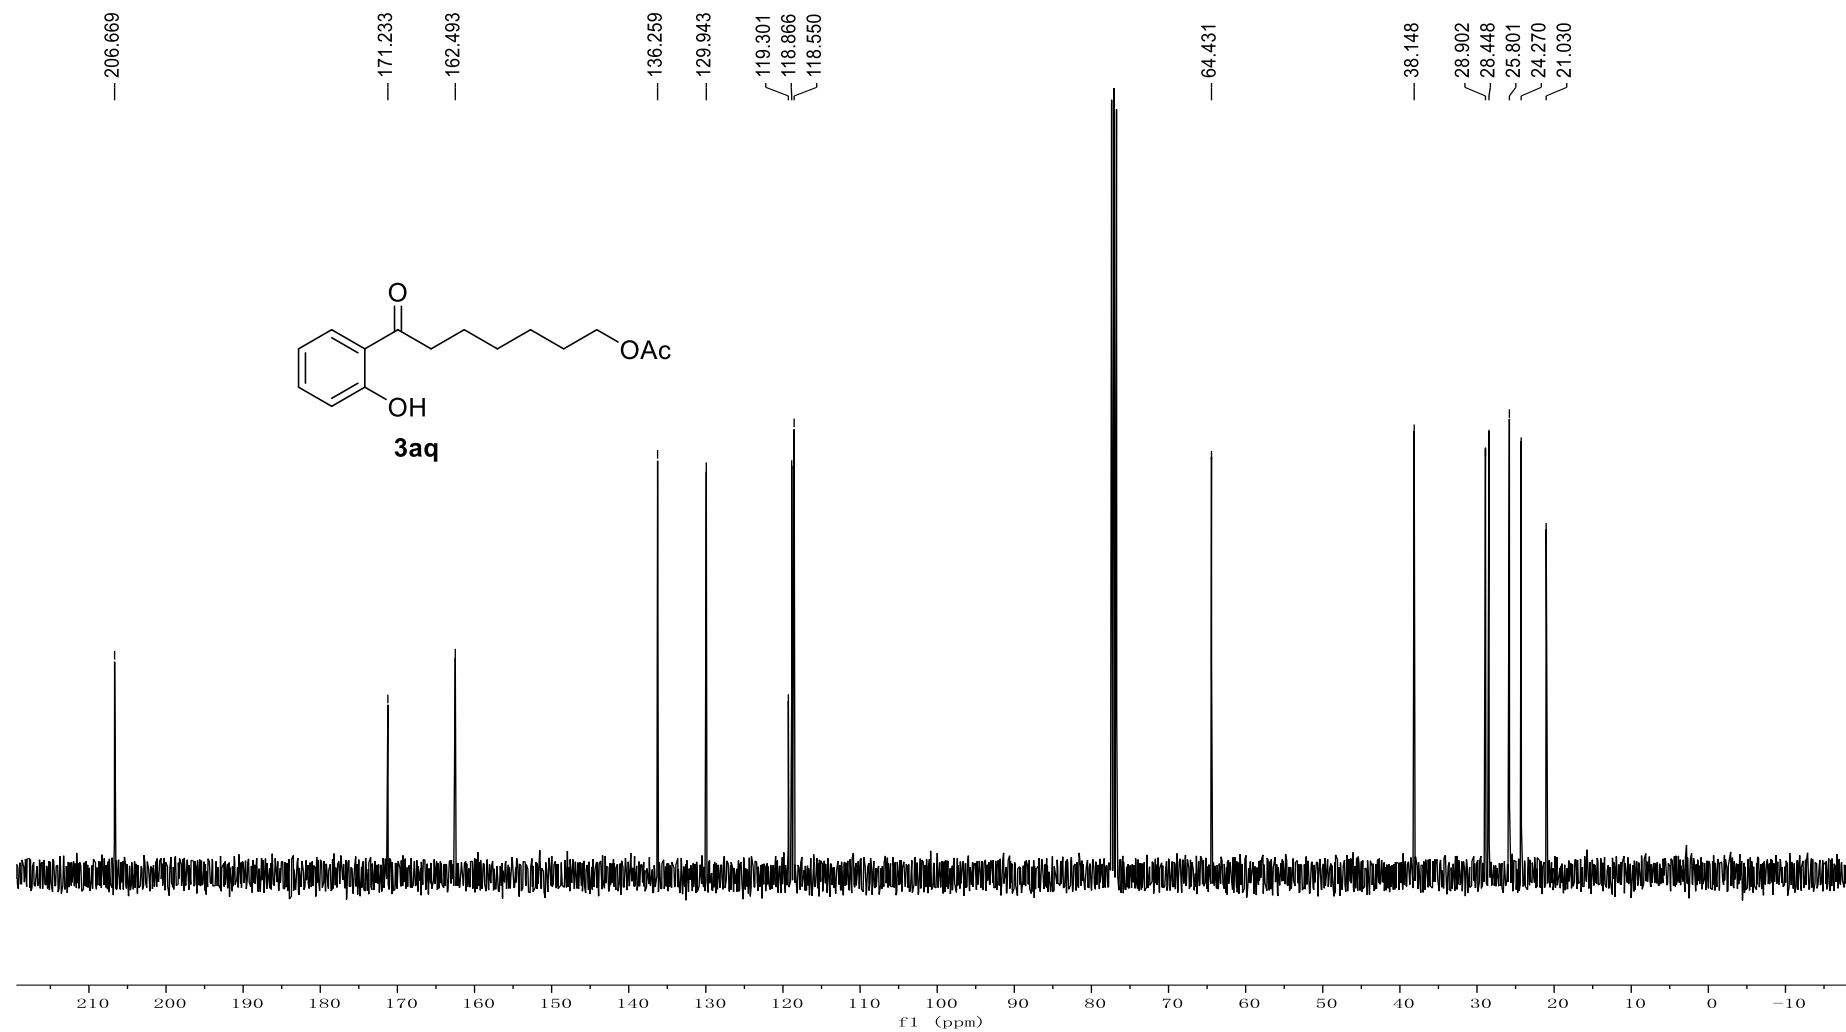

$^1\text{H}$  NMR-spectrum (400 MHz,  $\text{CDCl}_3$ ) of **3ar**

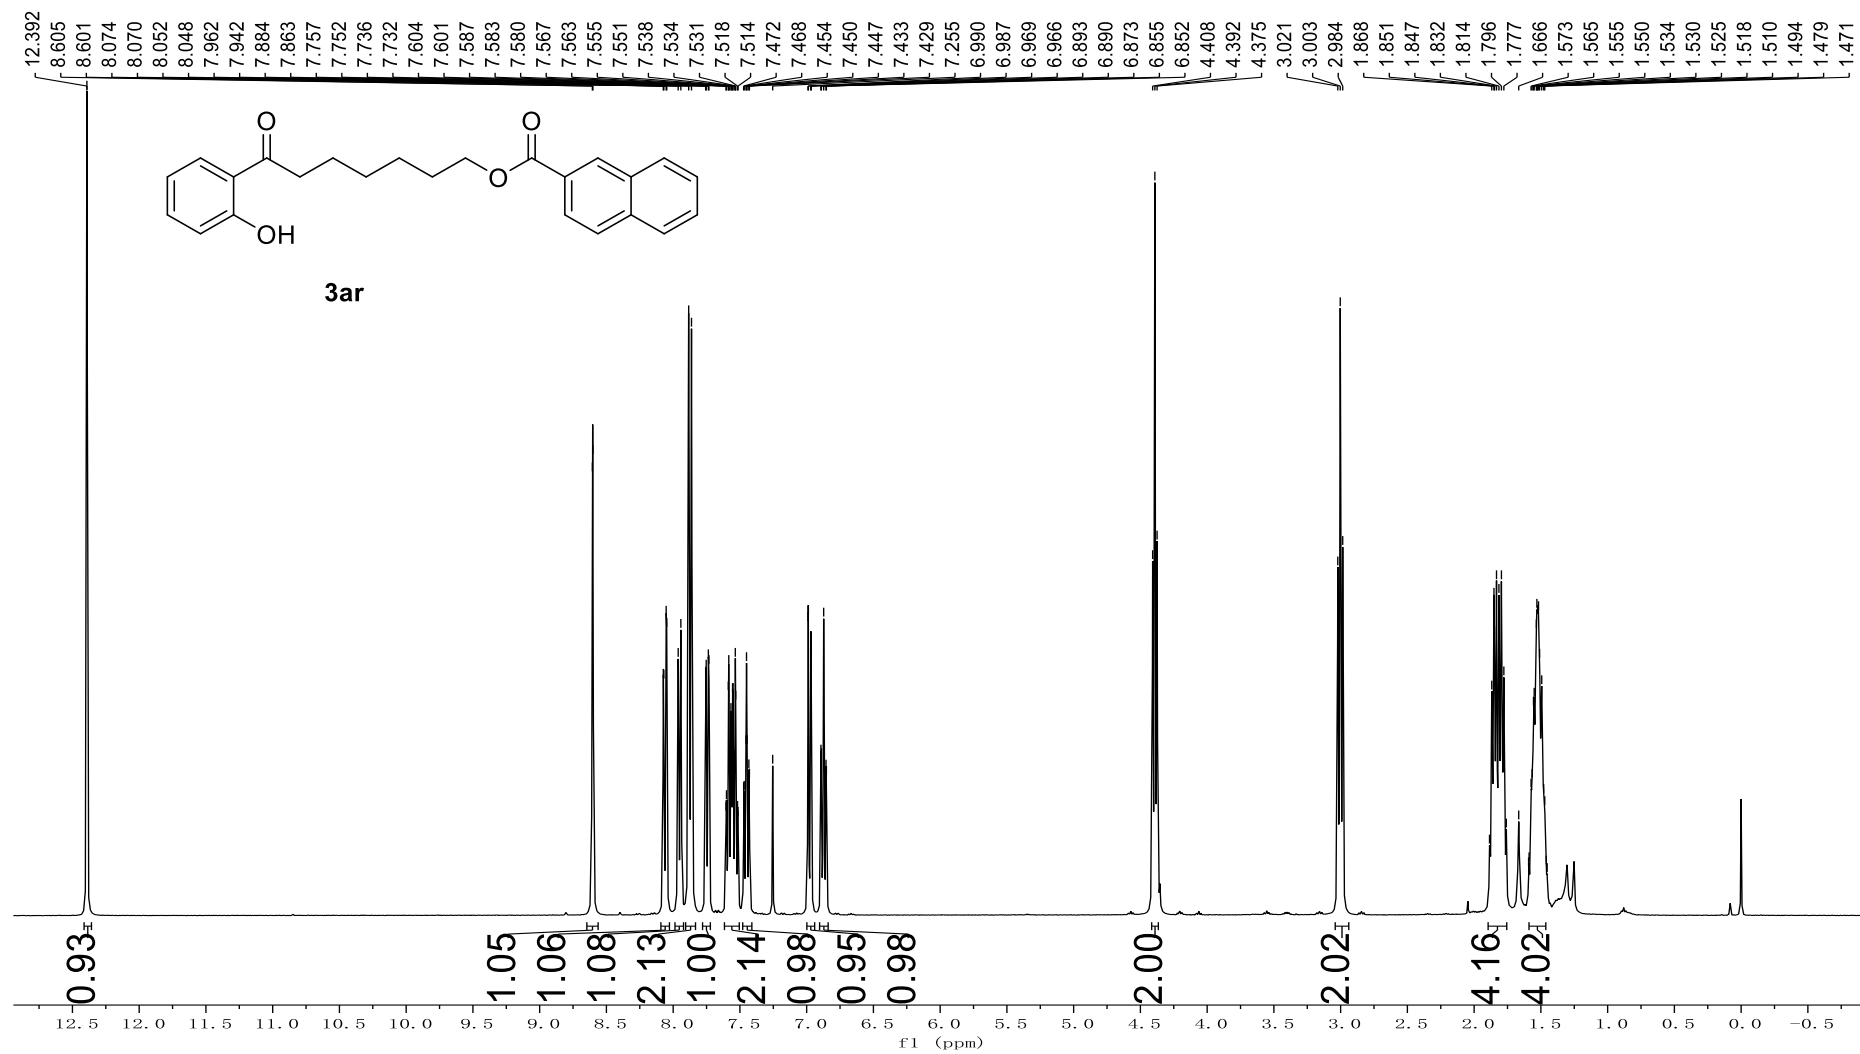

<sup>13</sup>C NMR-spectrum (101 MHz, CDCl<sub>3</sub>) of **3ar**

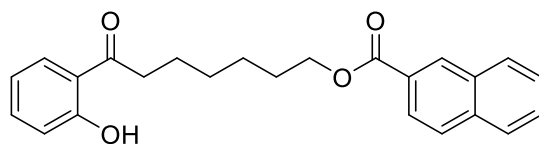

**3ar**

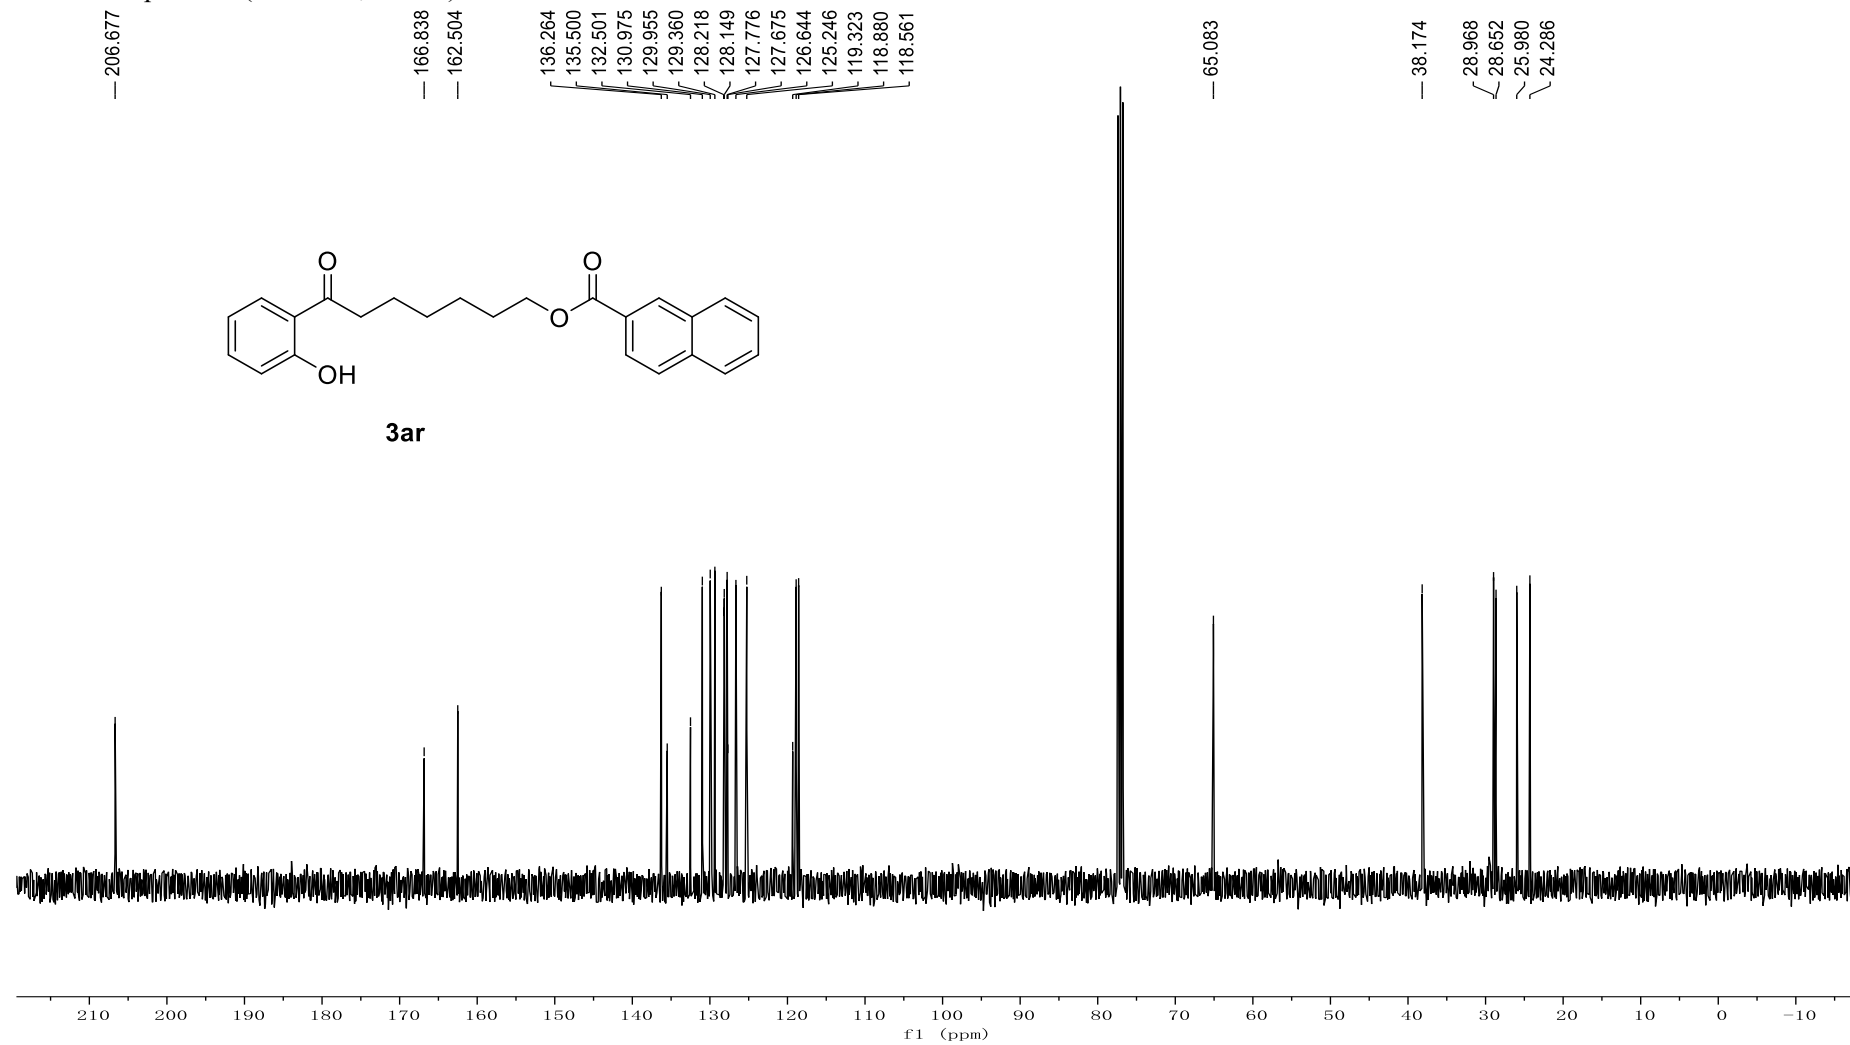

$^1\text{H}$  NMR-spectrum (500 MHz,  $\text{CDCl}_3$ ) of **3as**

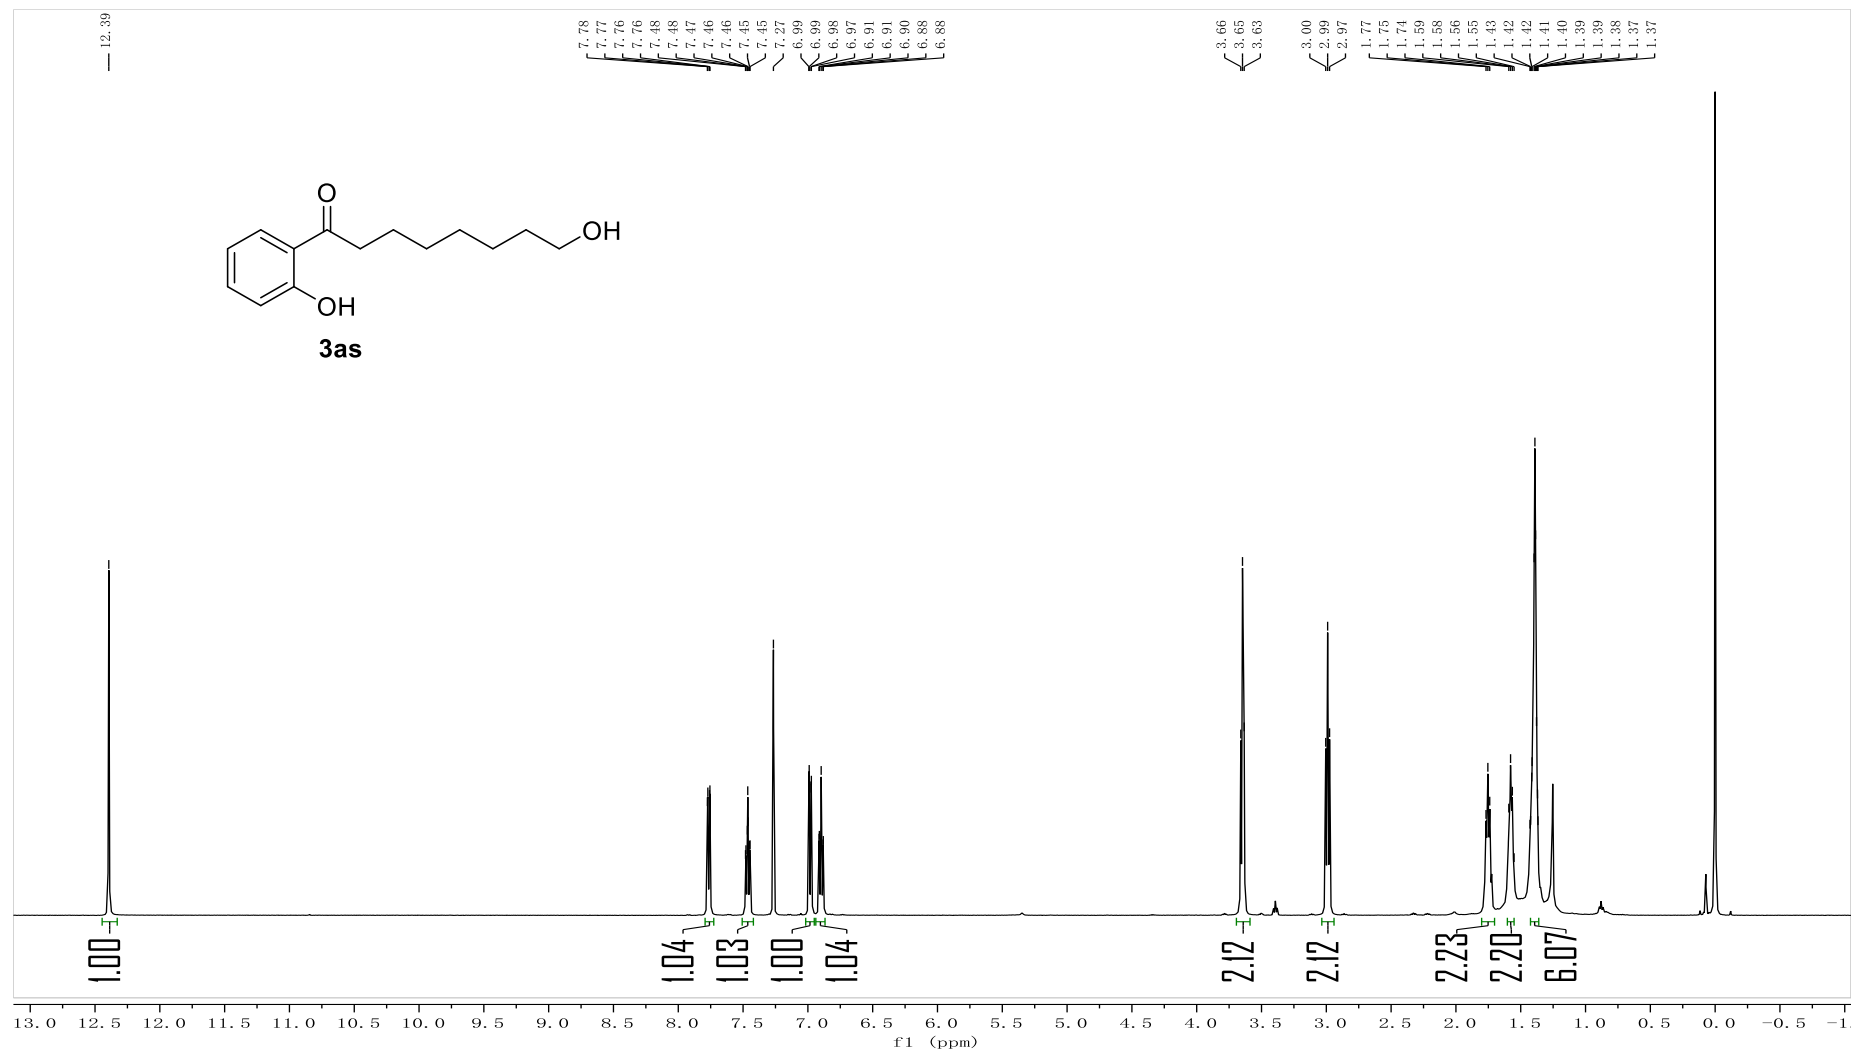

$^{13}\text{C}$  NMR-spectrum (126 MHz,  $\text{CDCl}_3$ ) of **3as**

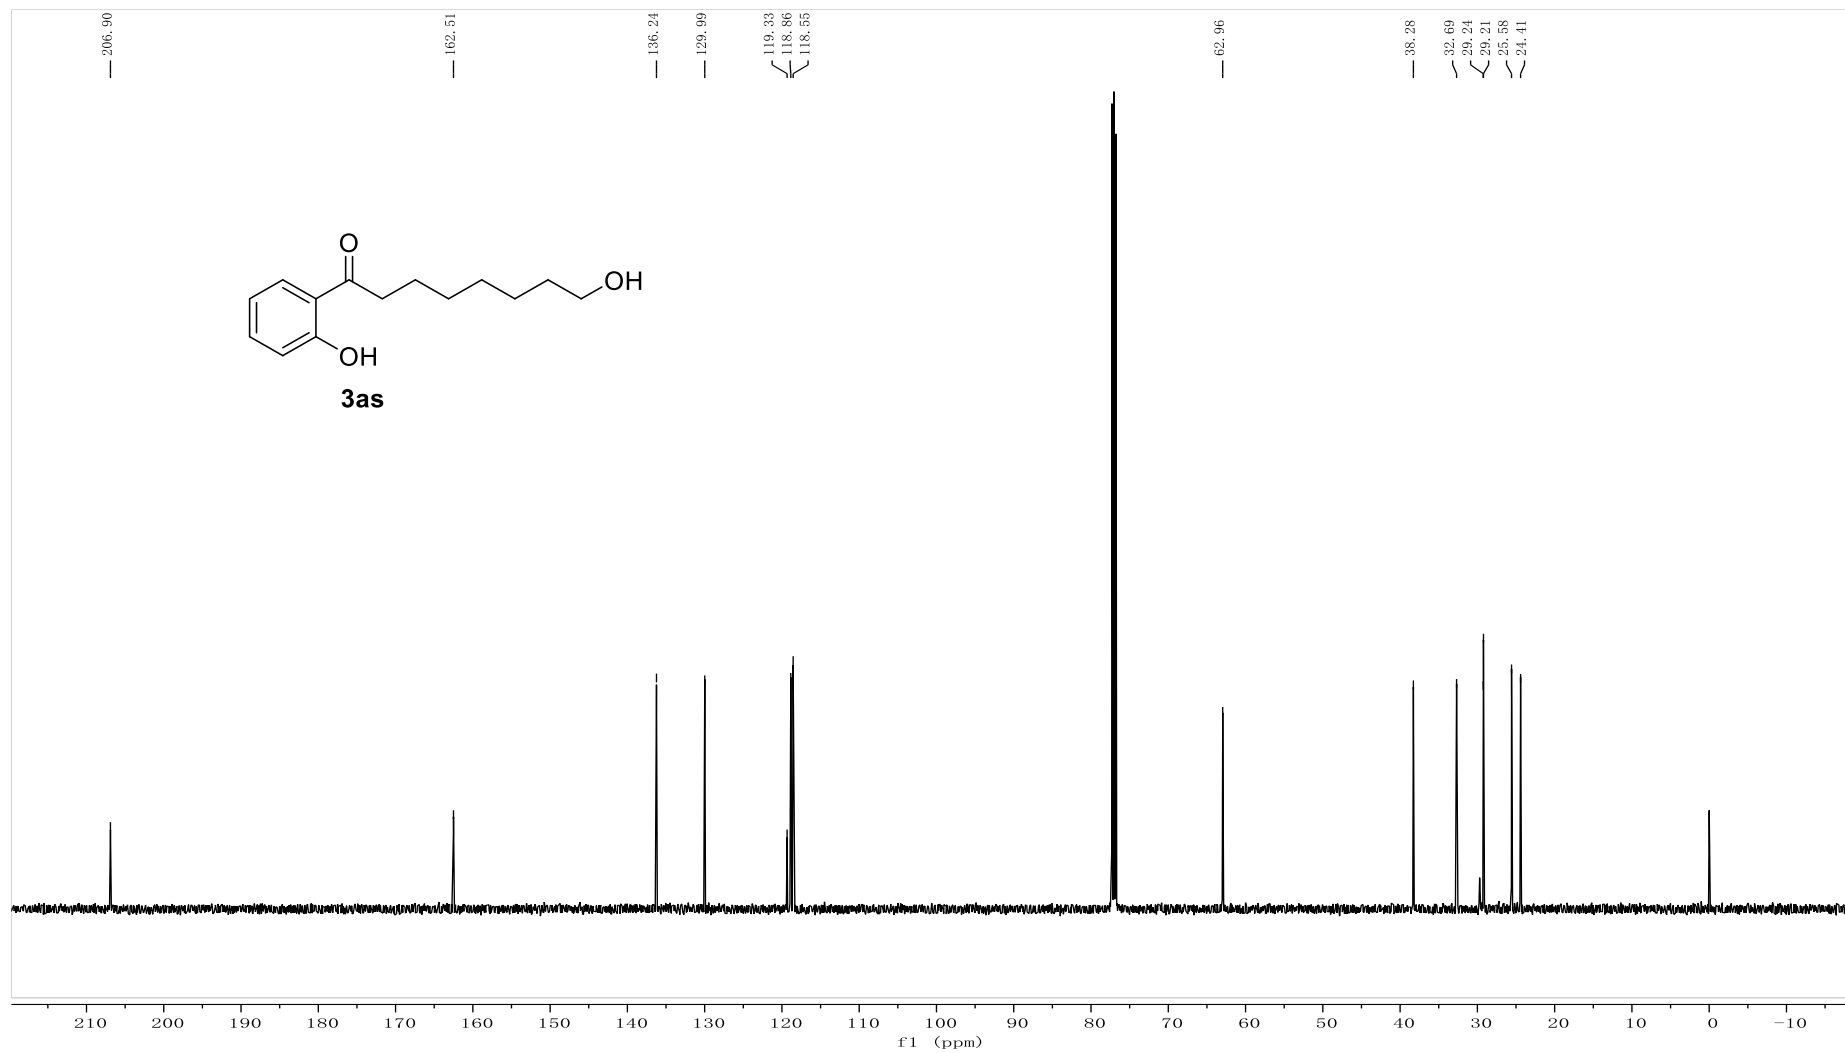

$^1\text{H}$  NMR-spectrum (400 MHz,  $\text{CDCl}_3$ ) of **3at**

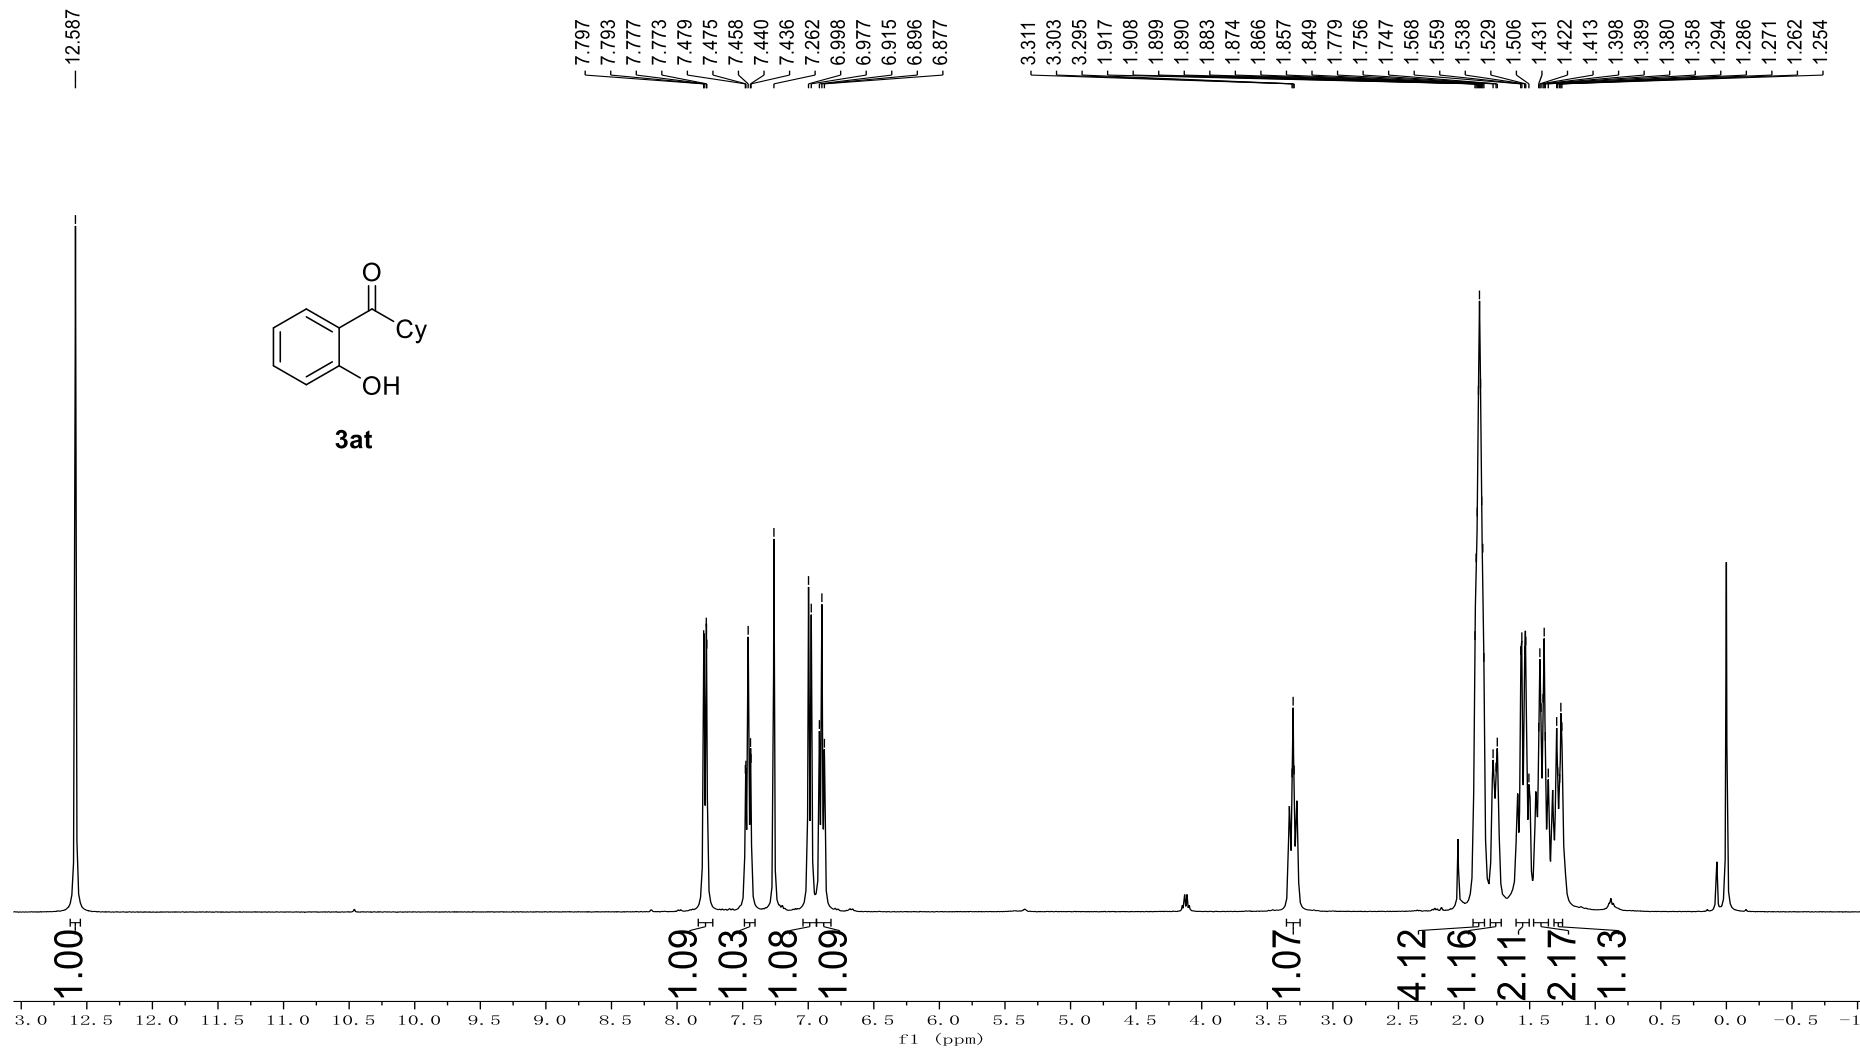

$^{13}\text{C}$  NMR-spectrum (101 MHz,  $\text{CDCl}_3$ ) of **3at**

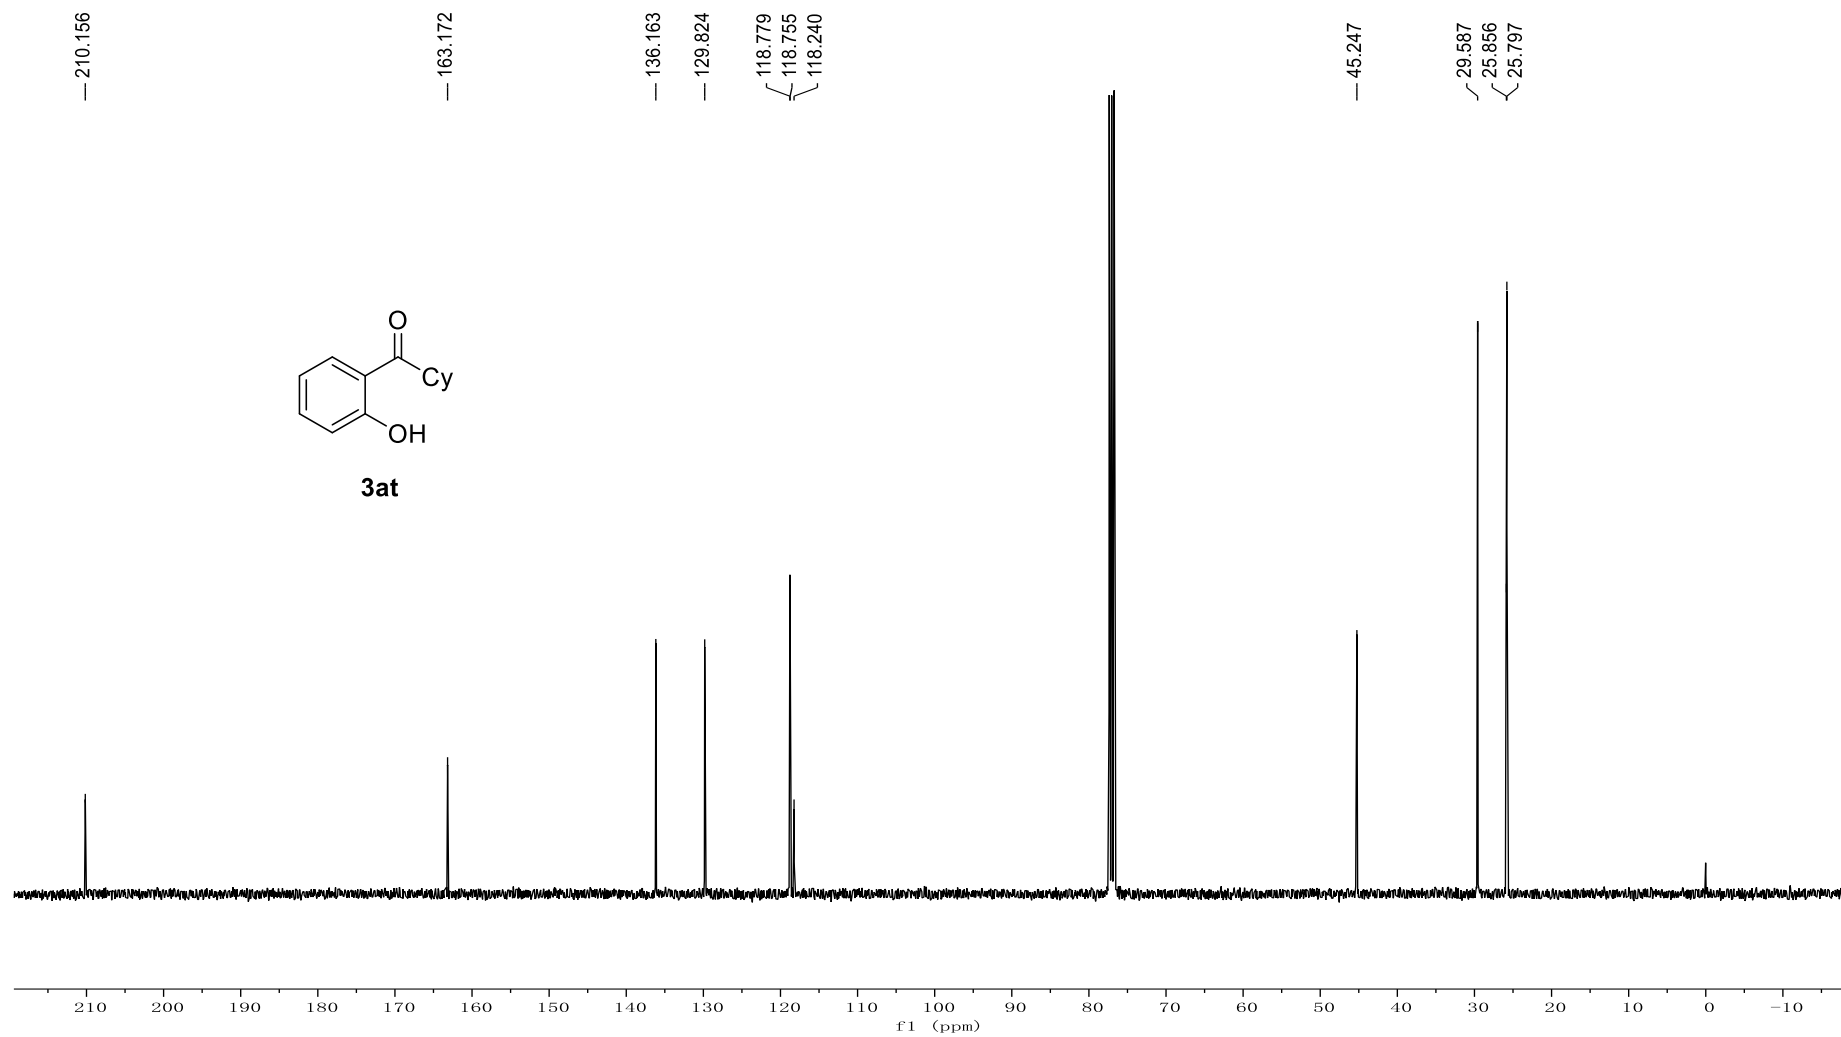

$^1\text{H}$  NMR-spectrum (500 MHz,  $\text{CDCl}_3$ ) of **3au**

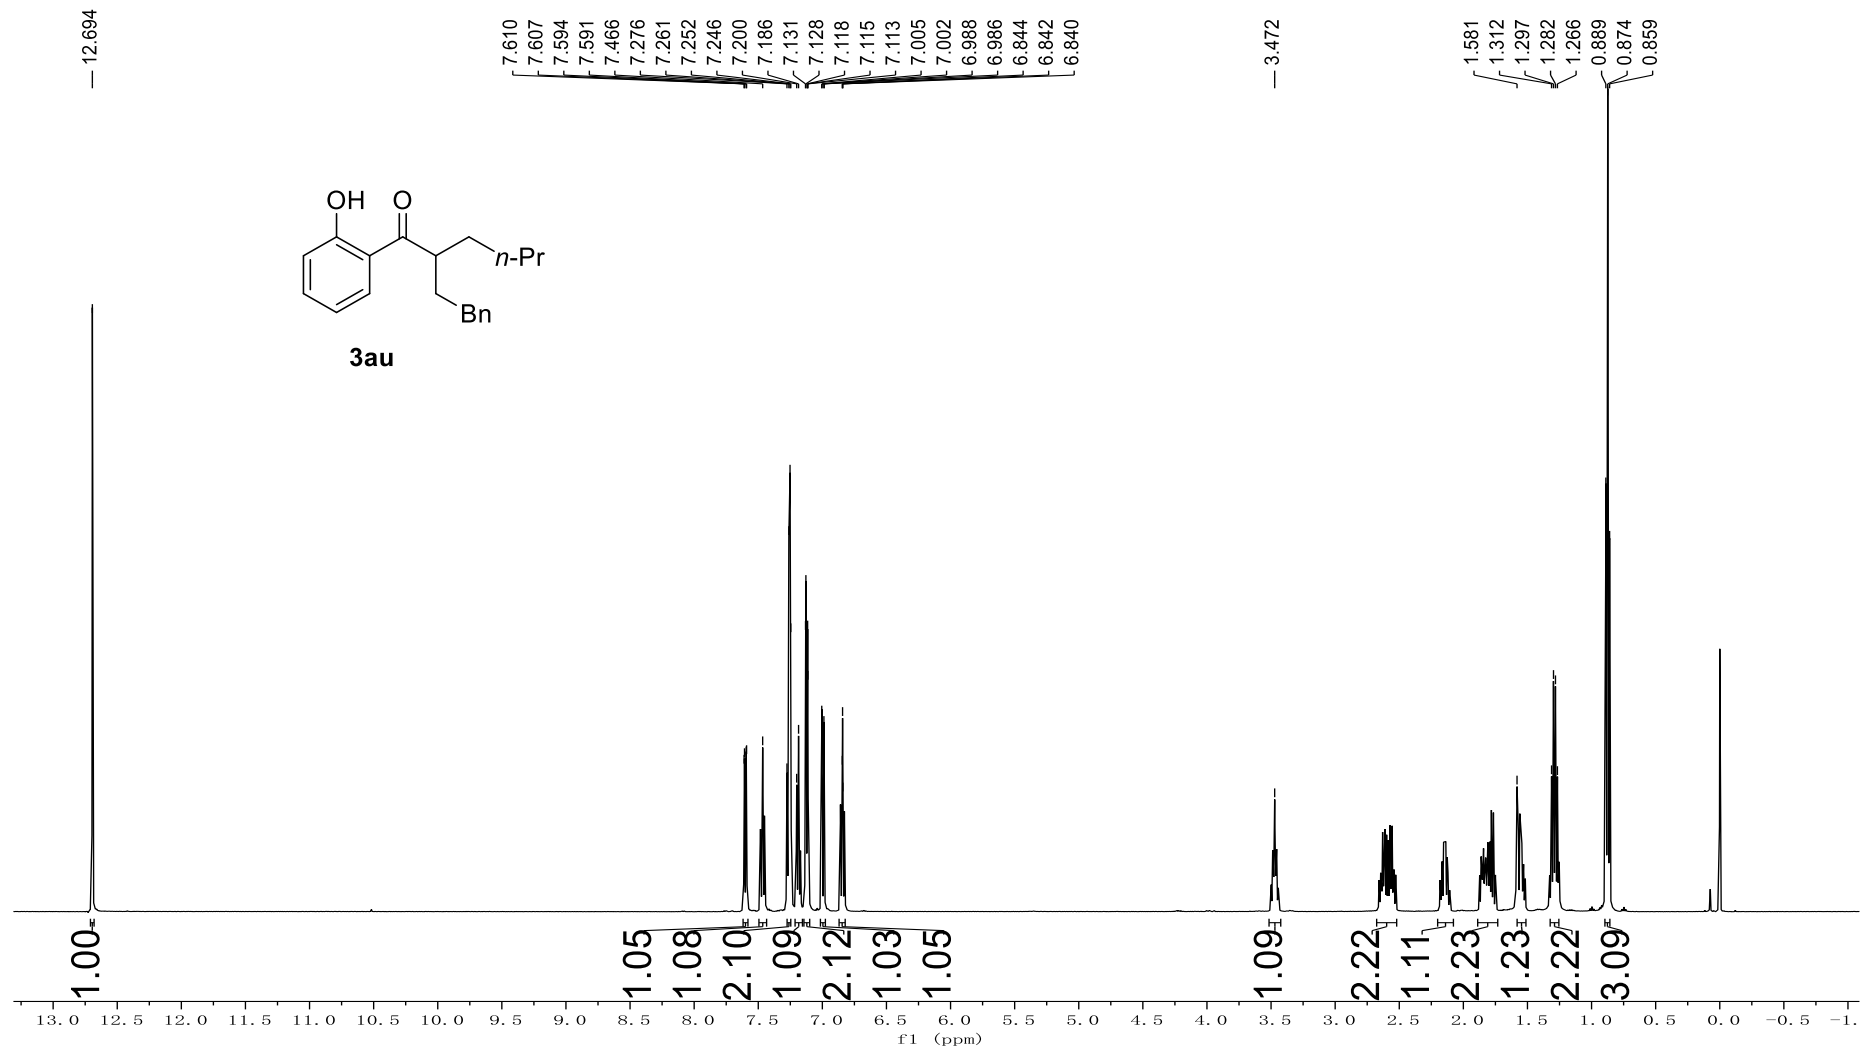



$^{13}\text{C}$  NMR-spectrum (101 MHz,  $\text{CDCl}_3$ ) of **3au**

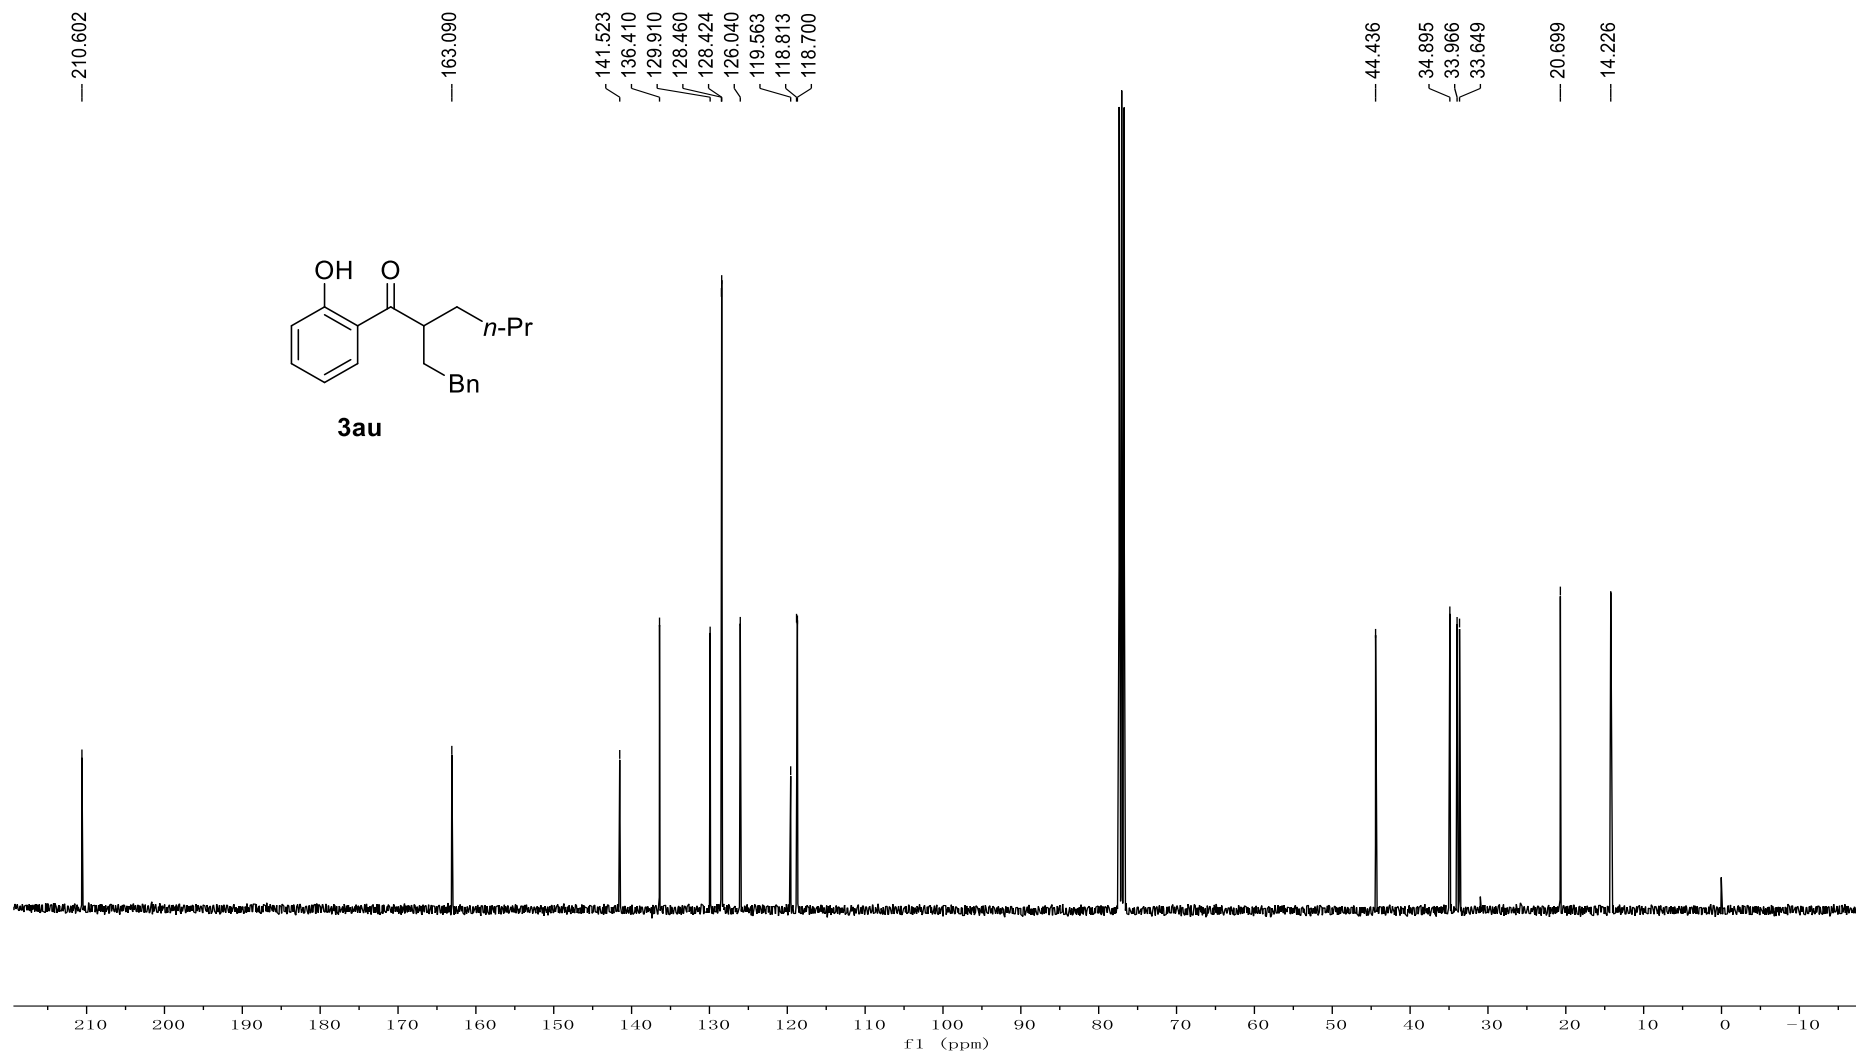

<sup>1</sup>H NMR-spectrum (500 MHz, CDCl<sub>3</sub>) of **3av**

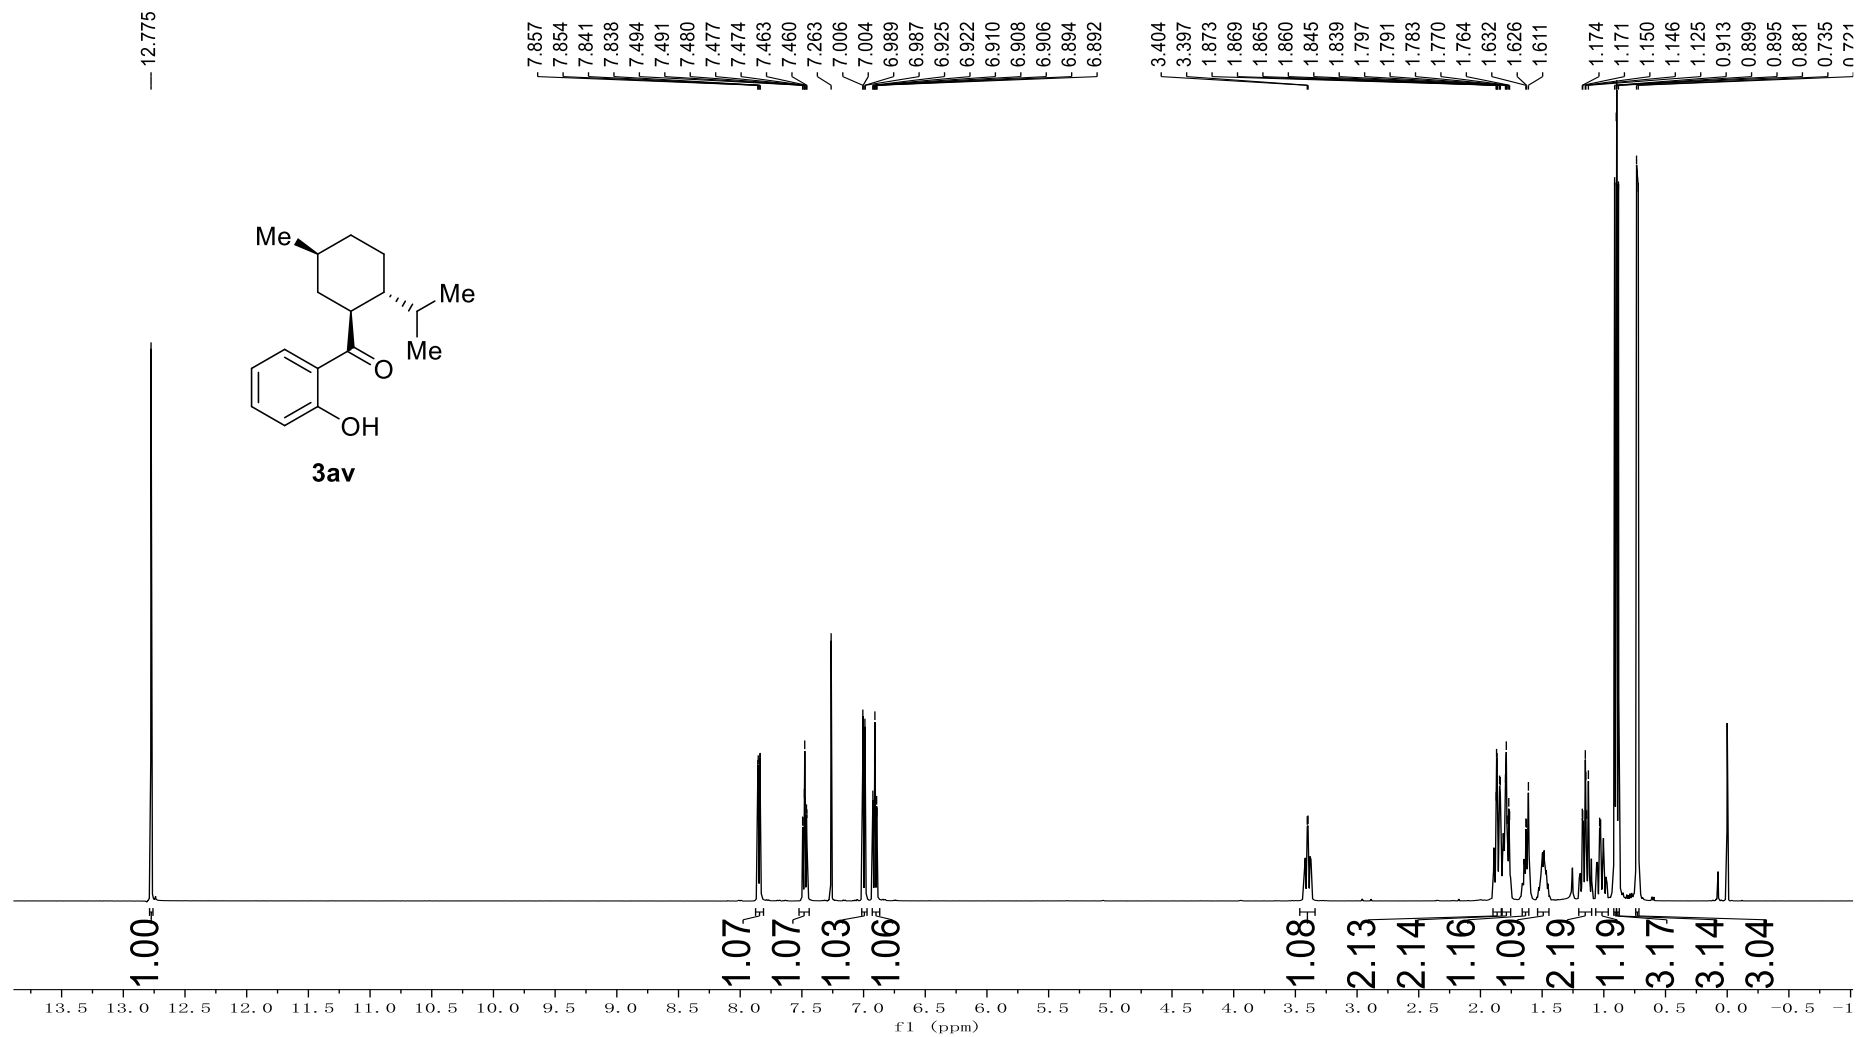

$^{13}\text{C}$  NMR-spectrum (101 MHz,  $\text{CDCl}_3$ ) of **3av**

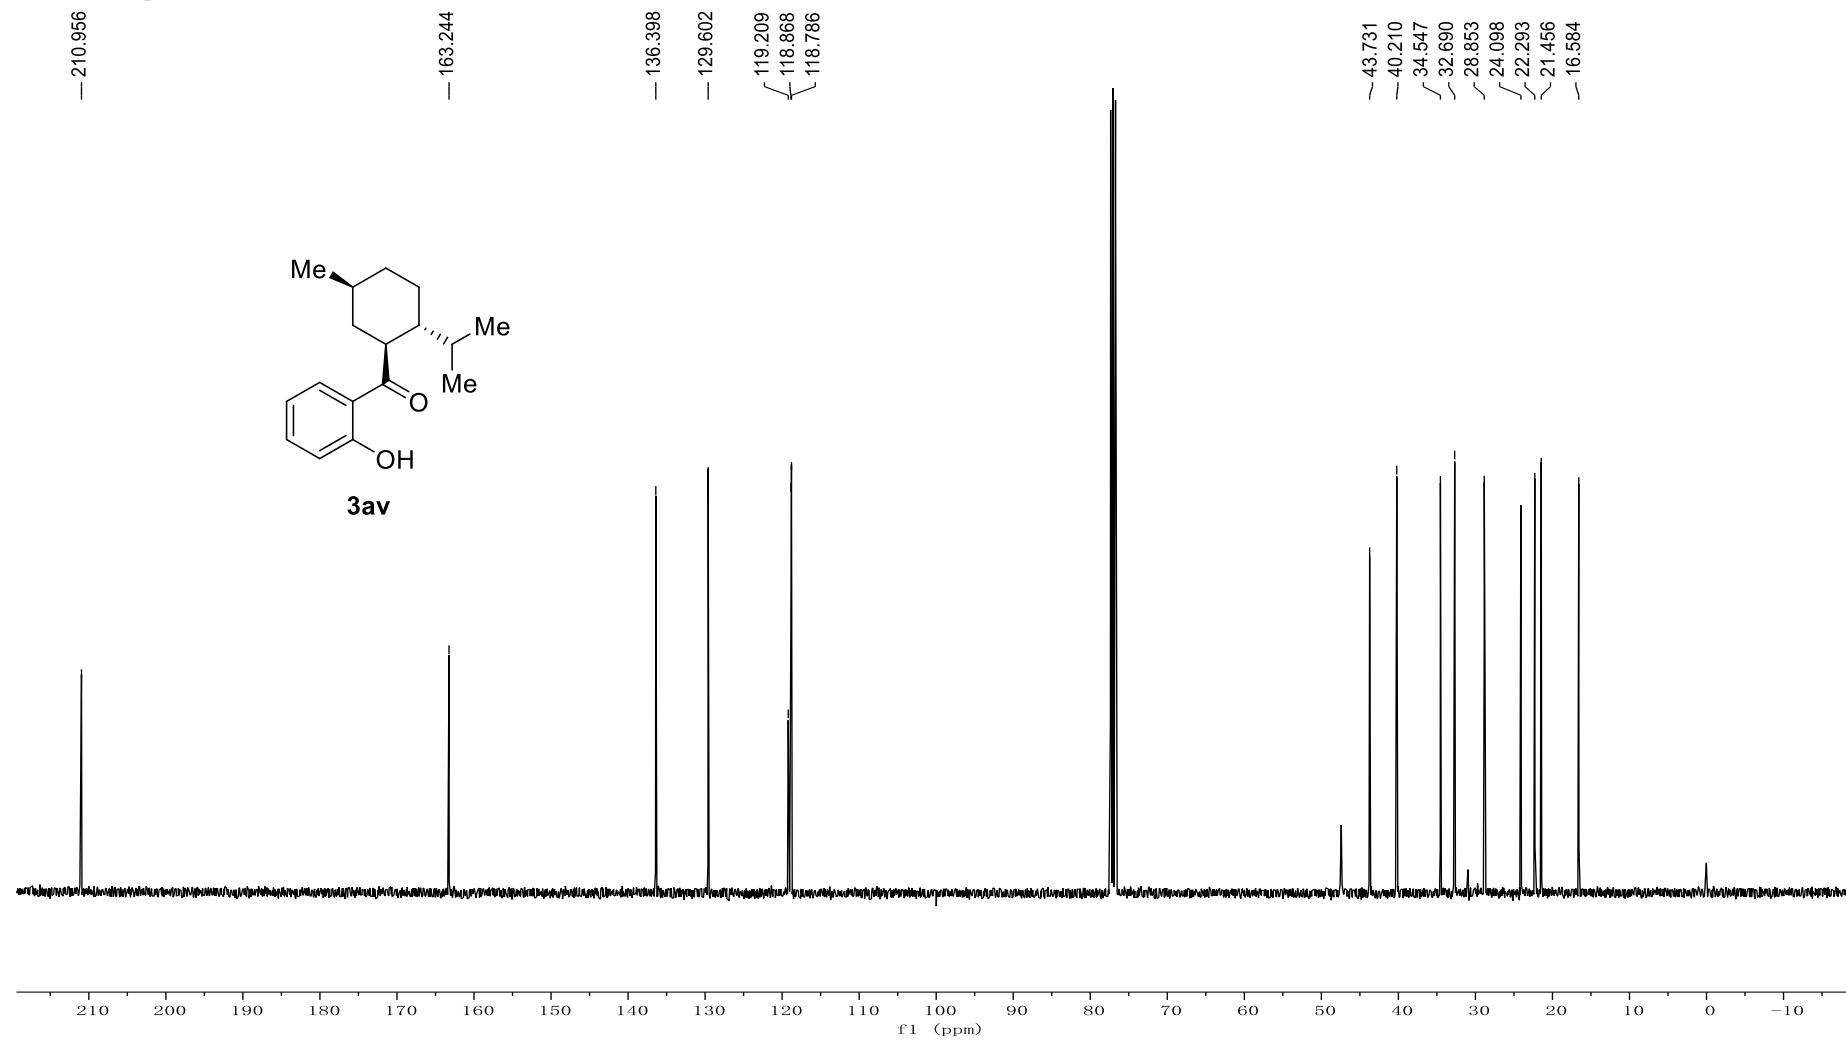

COSY-spectrum of **3av**

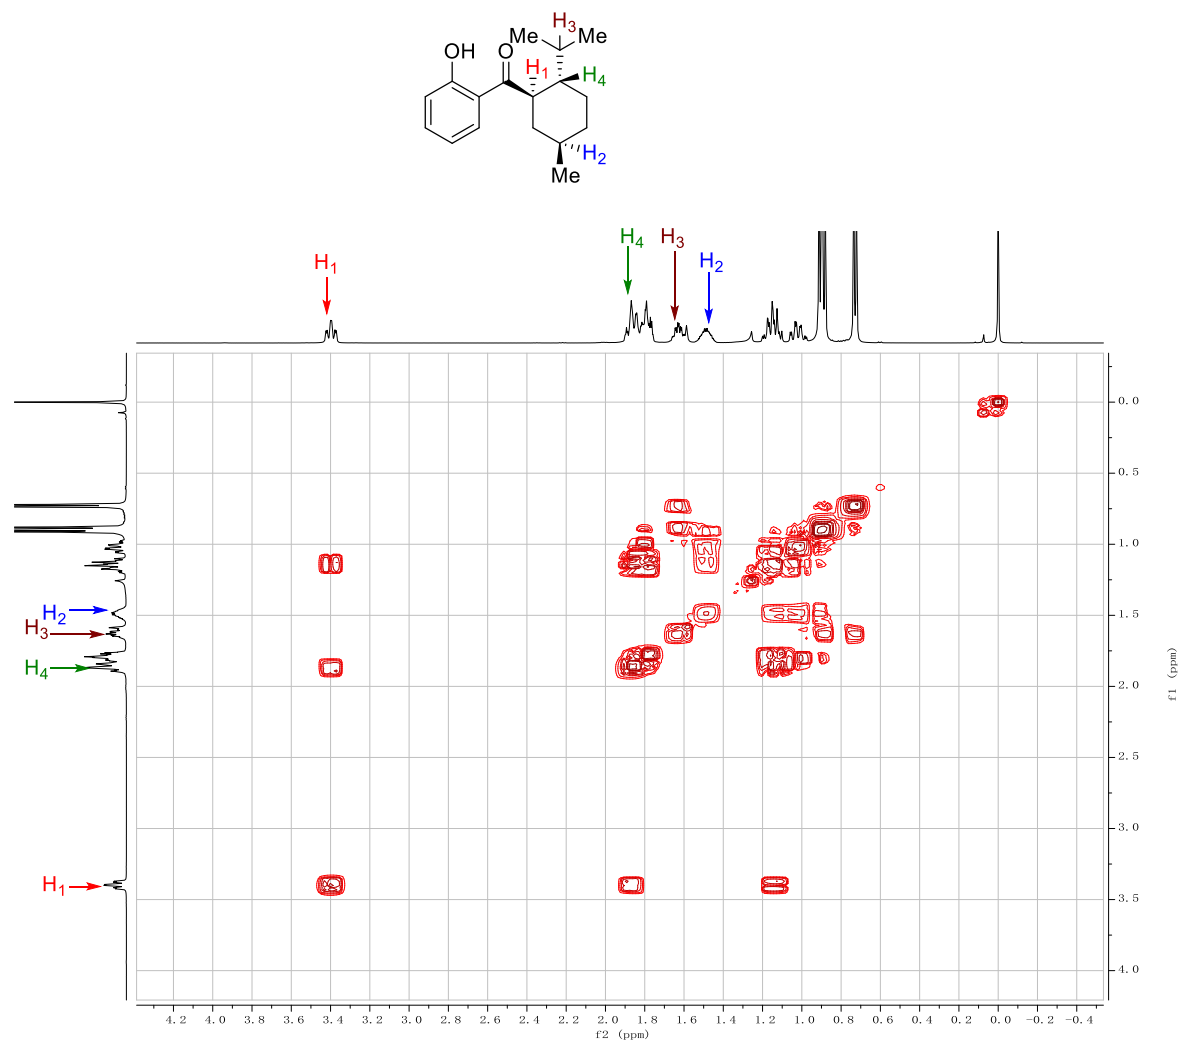

DEPT-135°-spectrum of **3av**

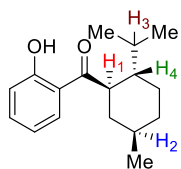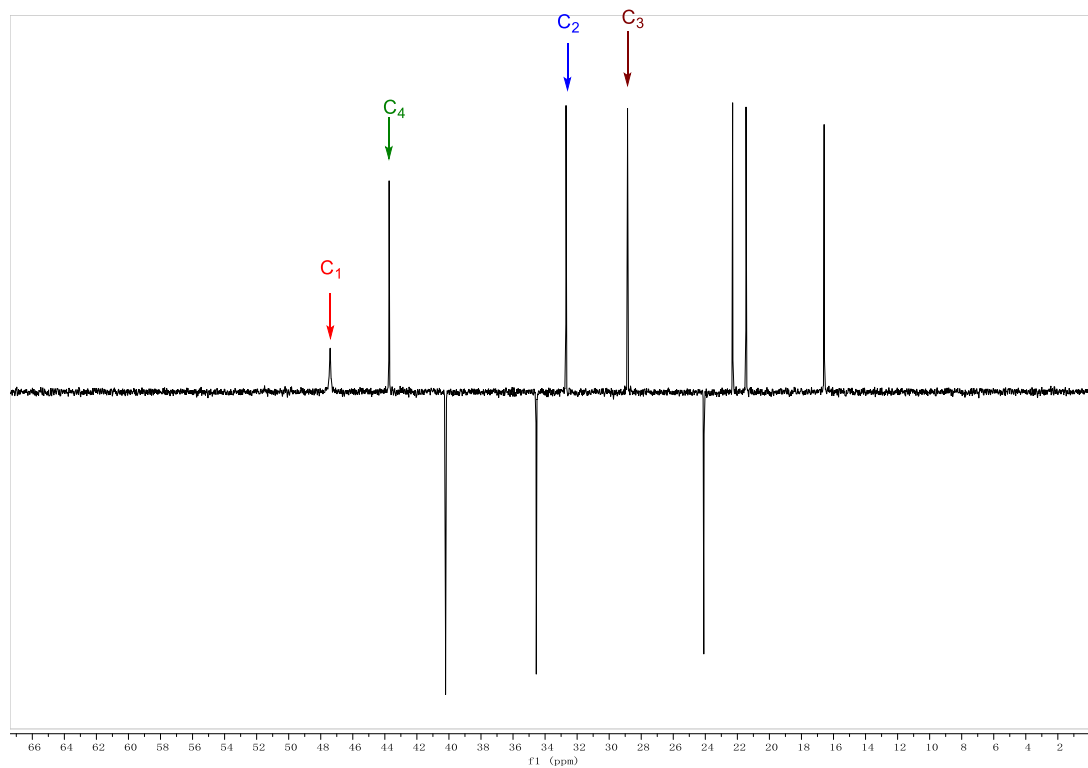

HSQC-spectrum of **3av**

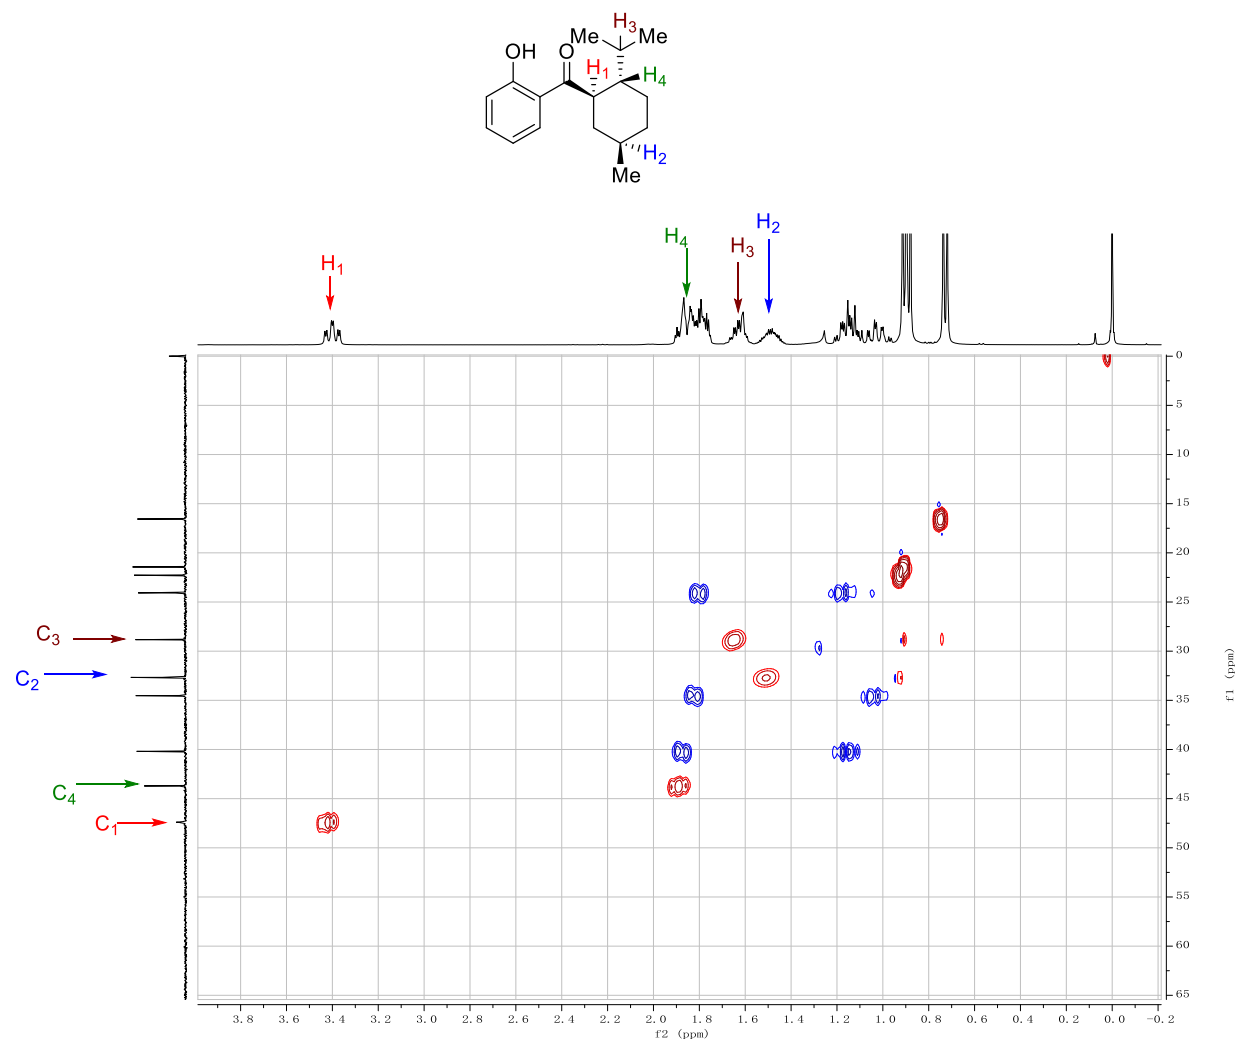

NOSEY-spectrum of **3av**

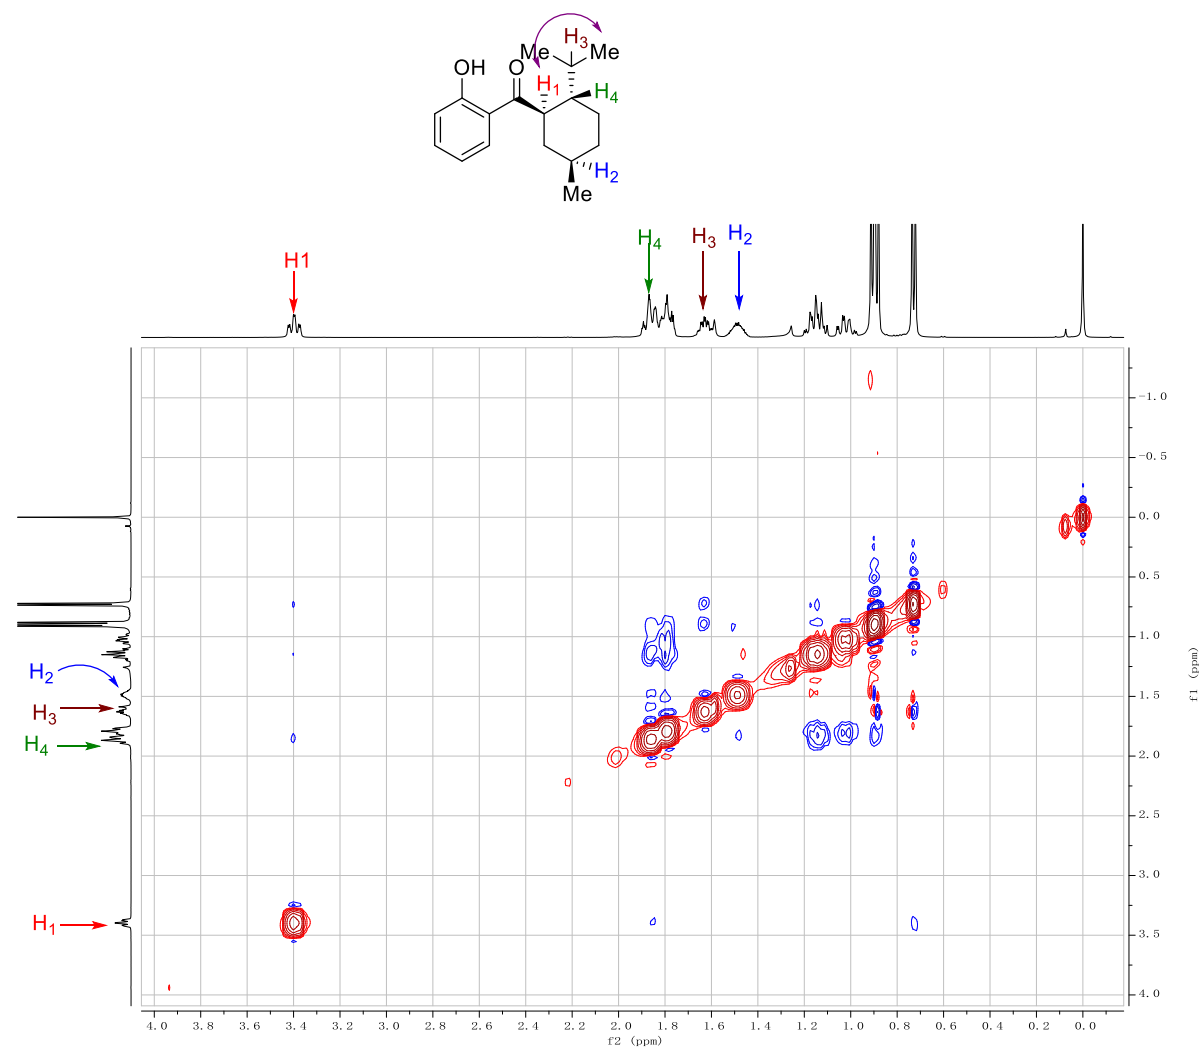

<sup>1</sup>H NMR-spectrum (500 MHz, CDCl<sub>3</sub>) of **3aw** and **3aw'**

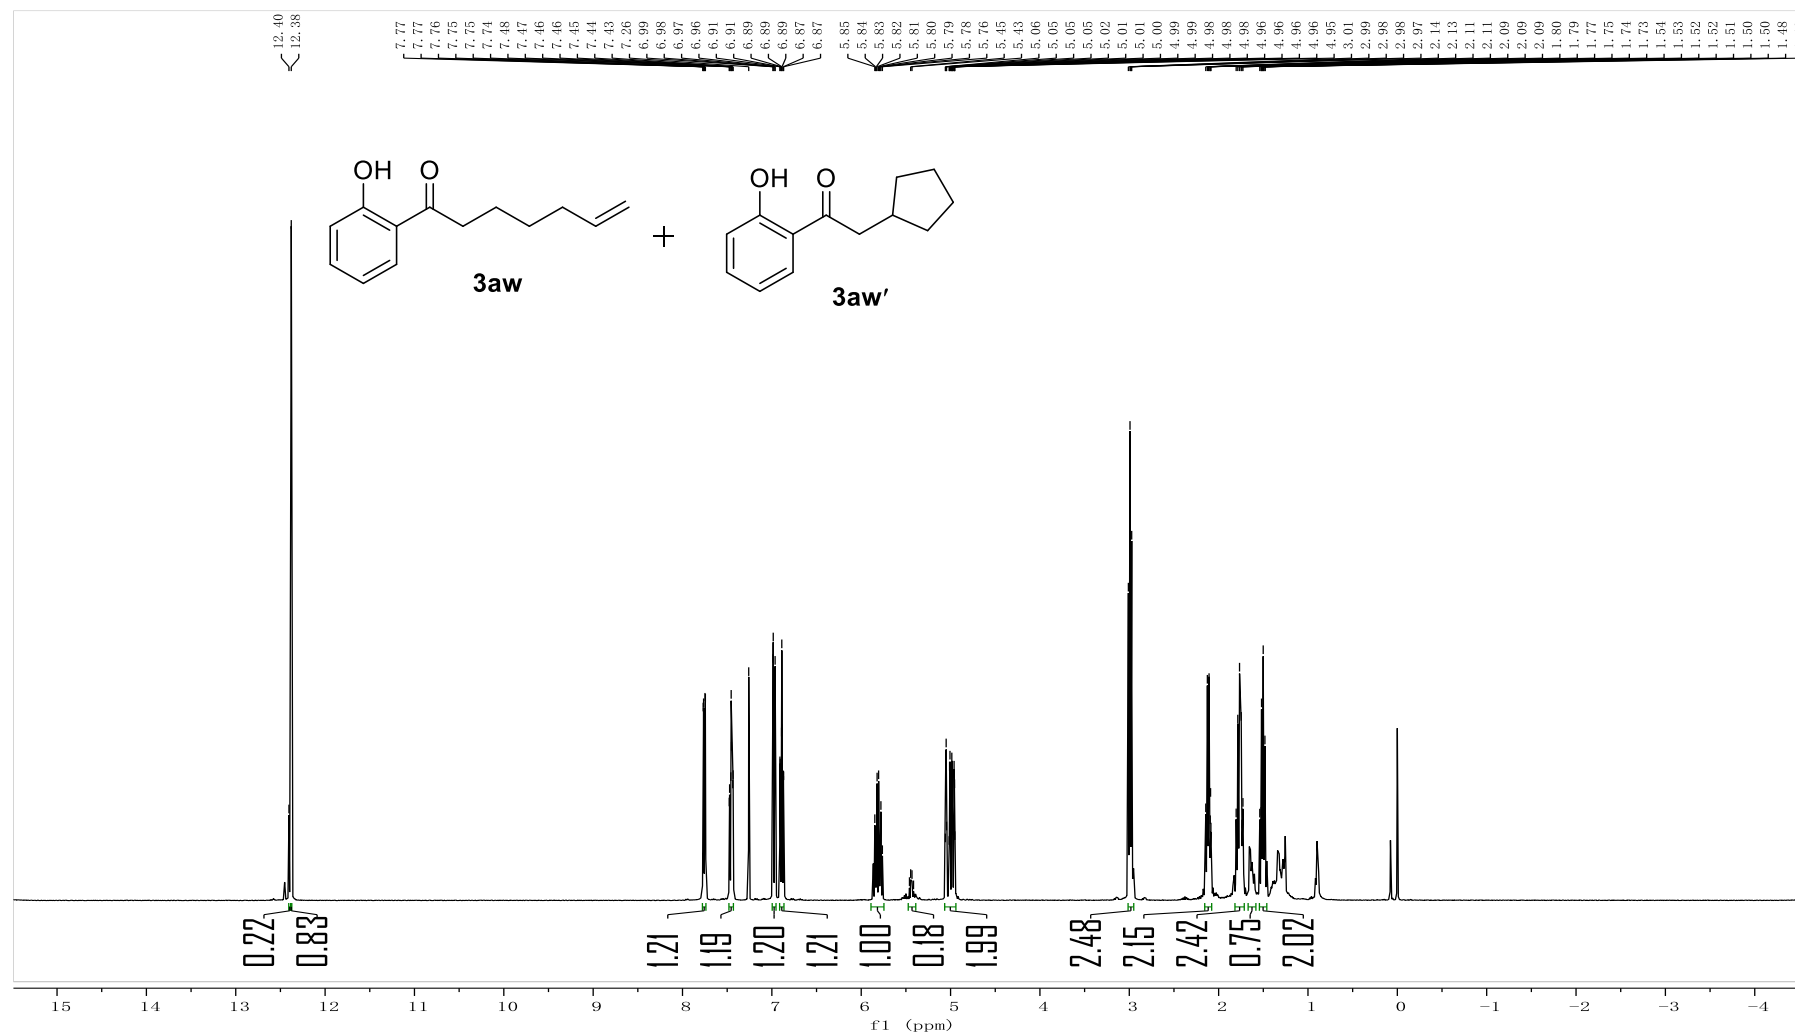



$^1\text{H}$  NMR-spectrum (400 MHz,  $\text{CDCl}_3$ ) of **3bk**

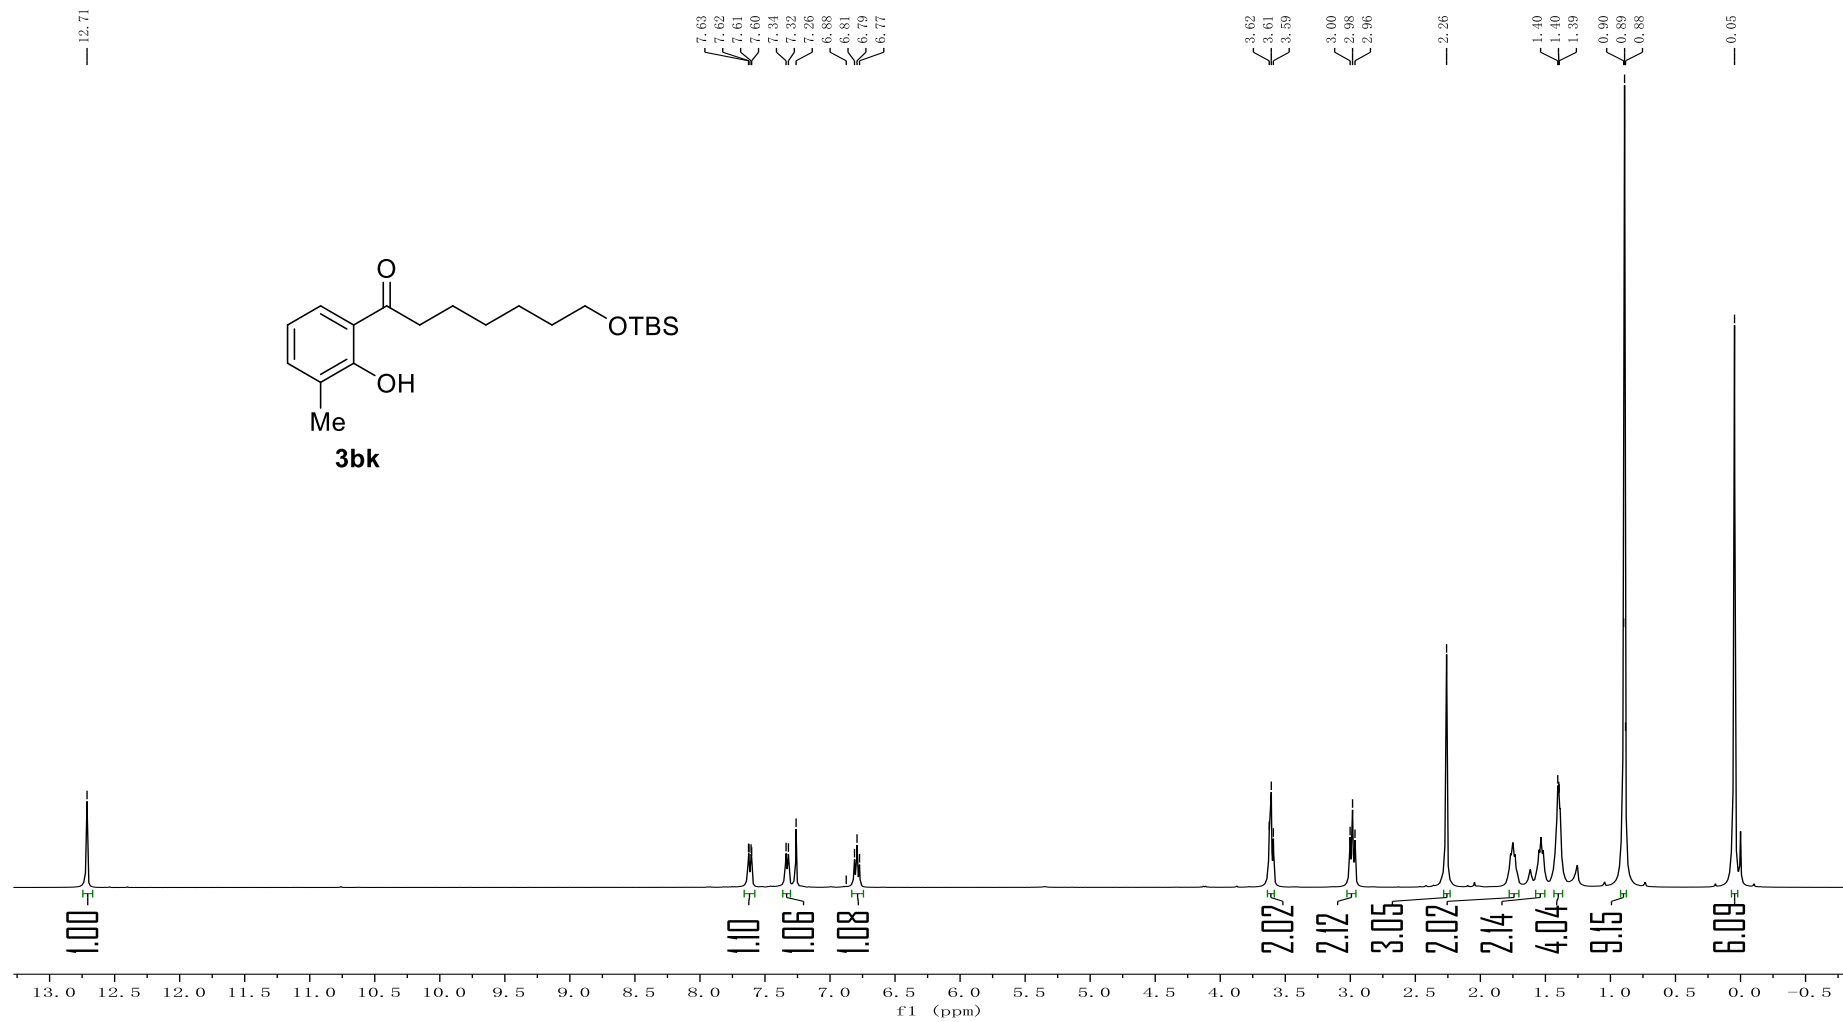

$^{13}\text{C}$  NMR-spectrum (101 MHz,  $\text{CDCl}_3$ ) of **3bk**

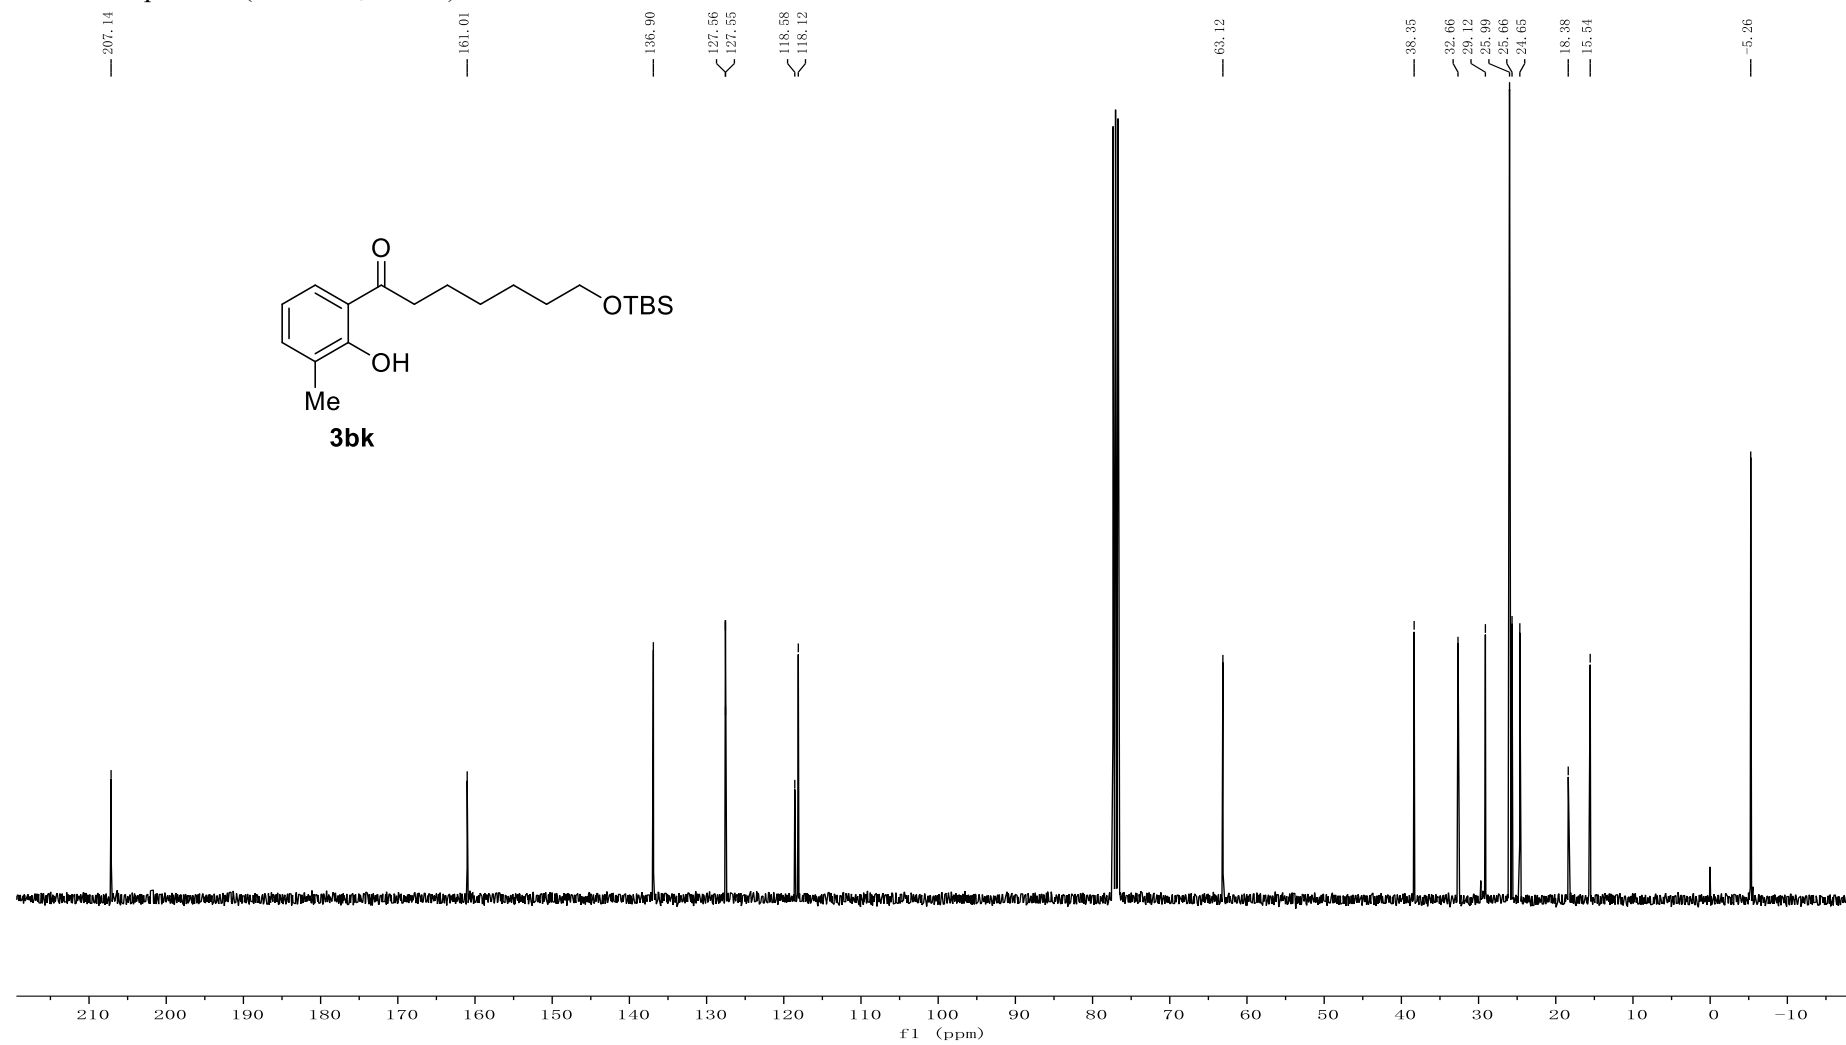

<sup>1</sup>H NMR-spectrum (400 MHz, CDCl<sub>3</sub>) of **3ck**

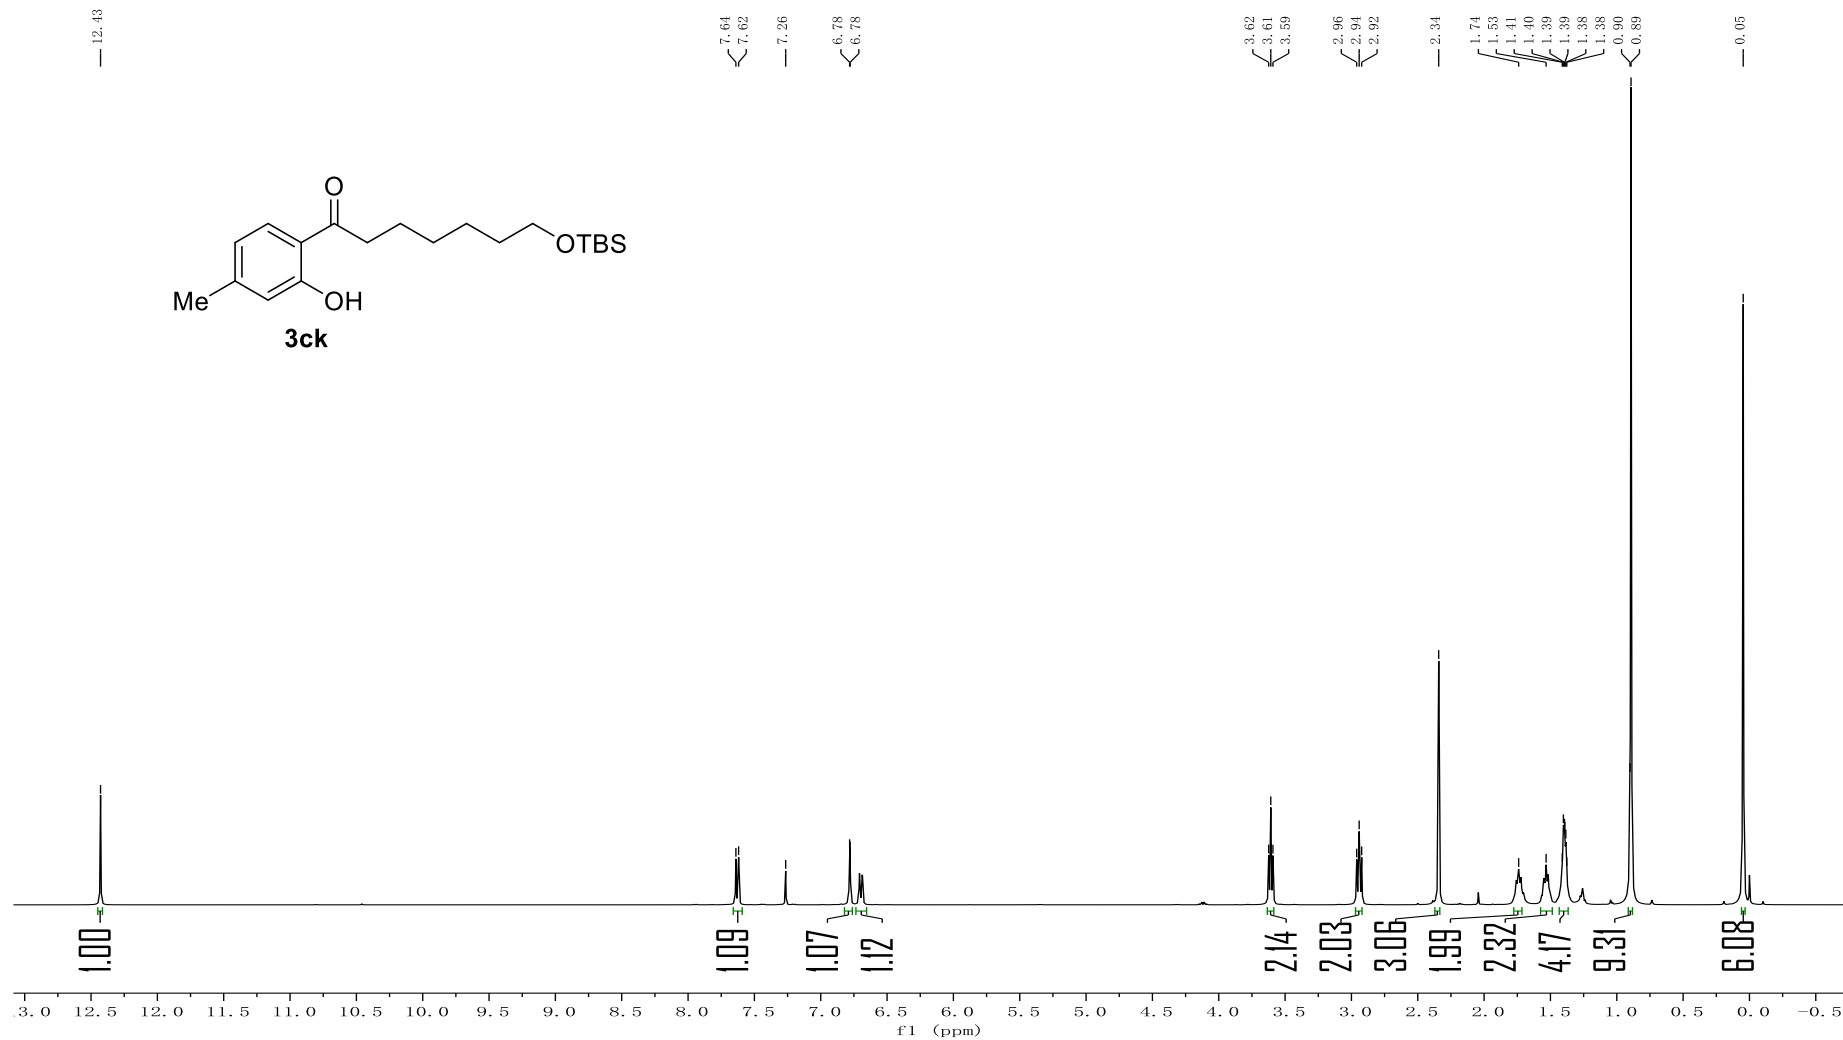

$^{13}\text{C}$  NMR-spectrum (101 MHz,  $\text{CDCl}_3$ ) of **3ck**

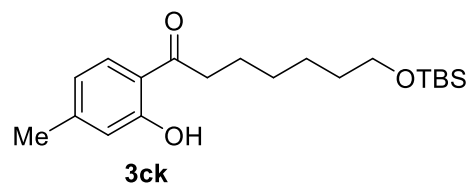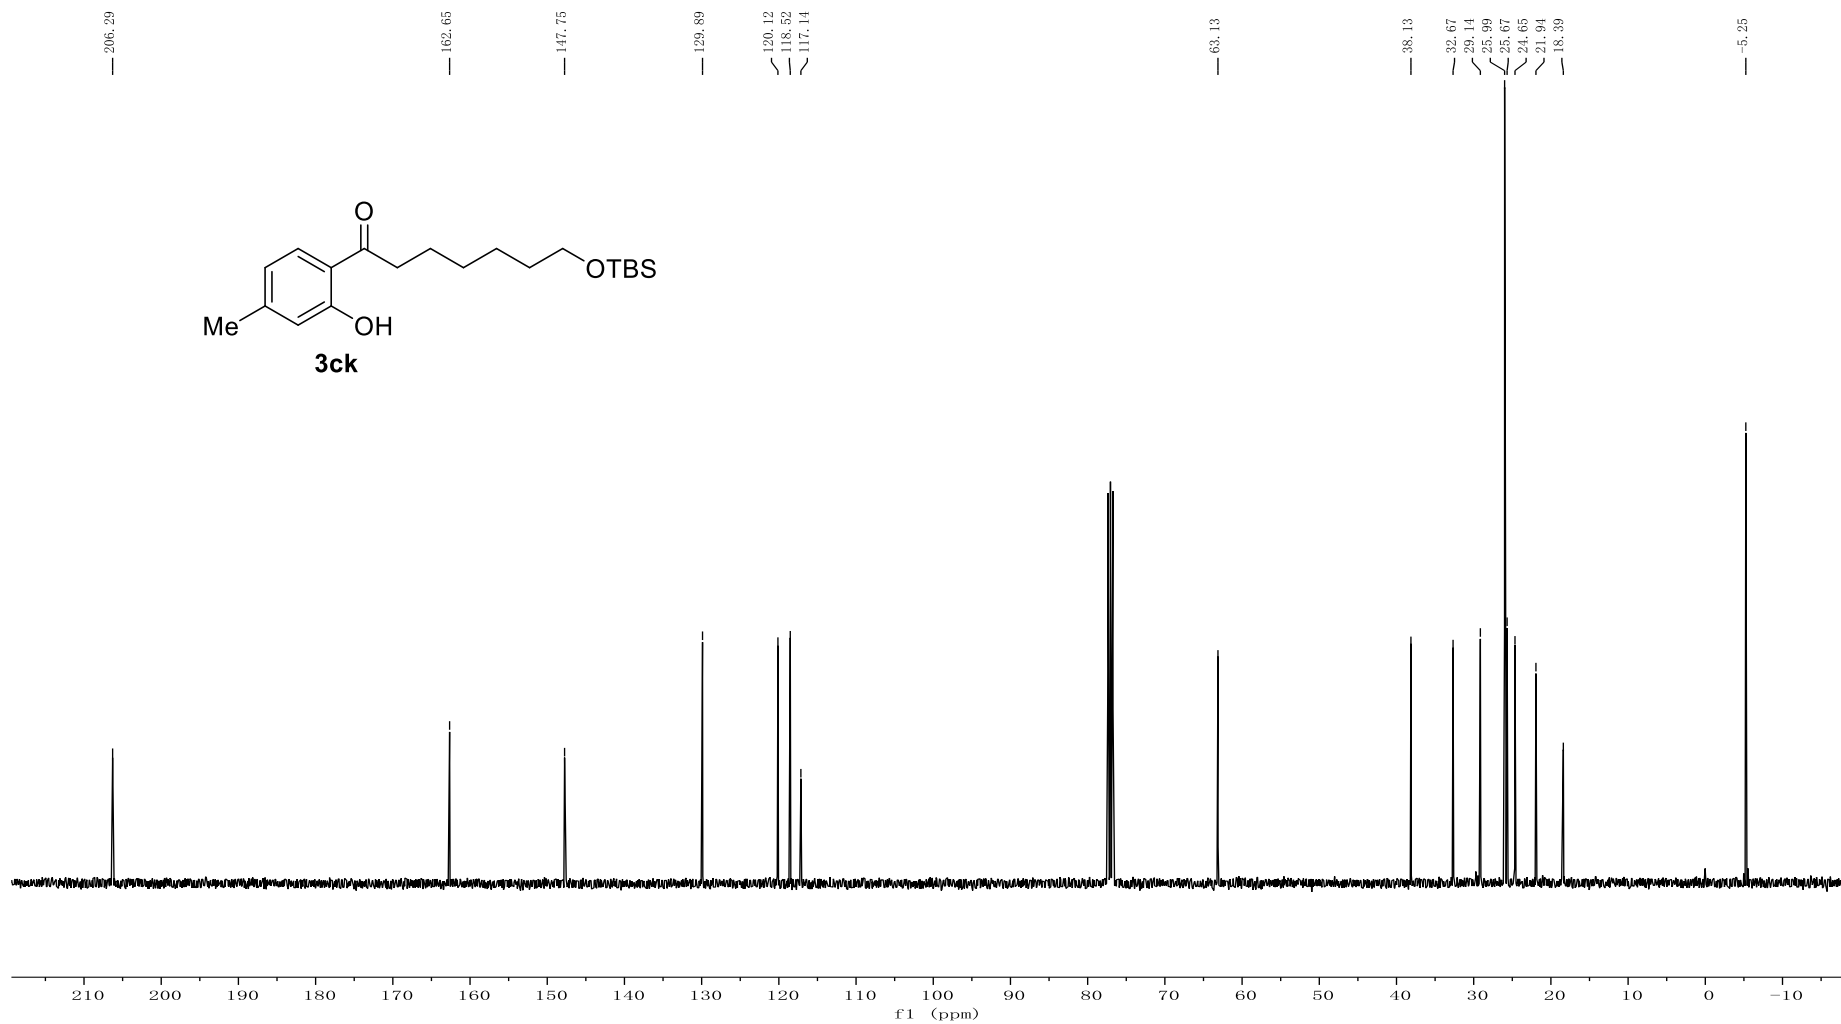

$^1\text{H}$  NMR-spectrum (400 MHz,  $\text{CDCl}_3$ ) of **3dk**

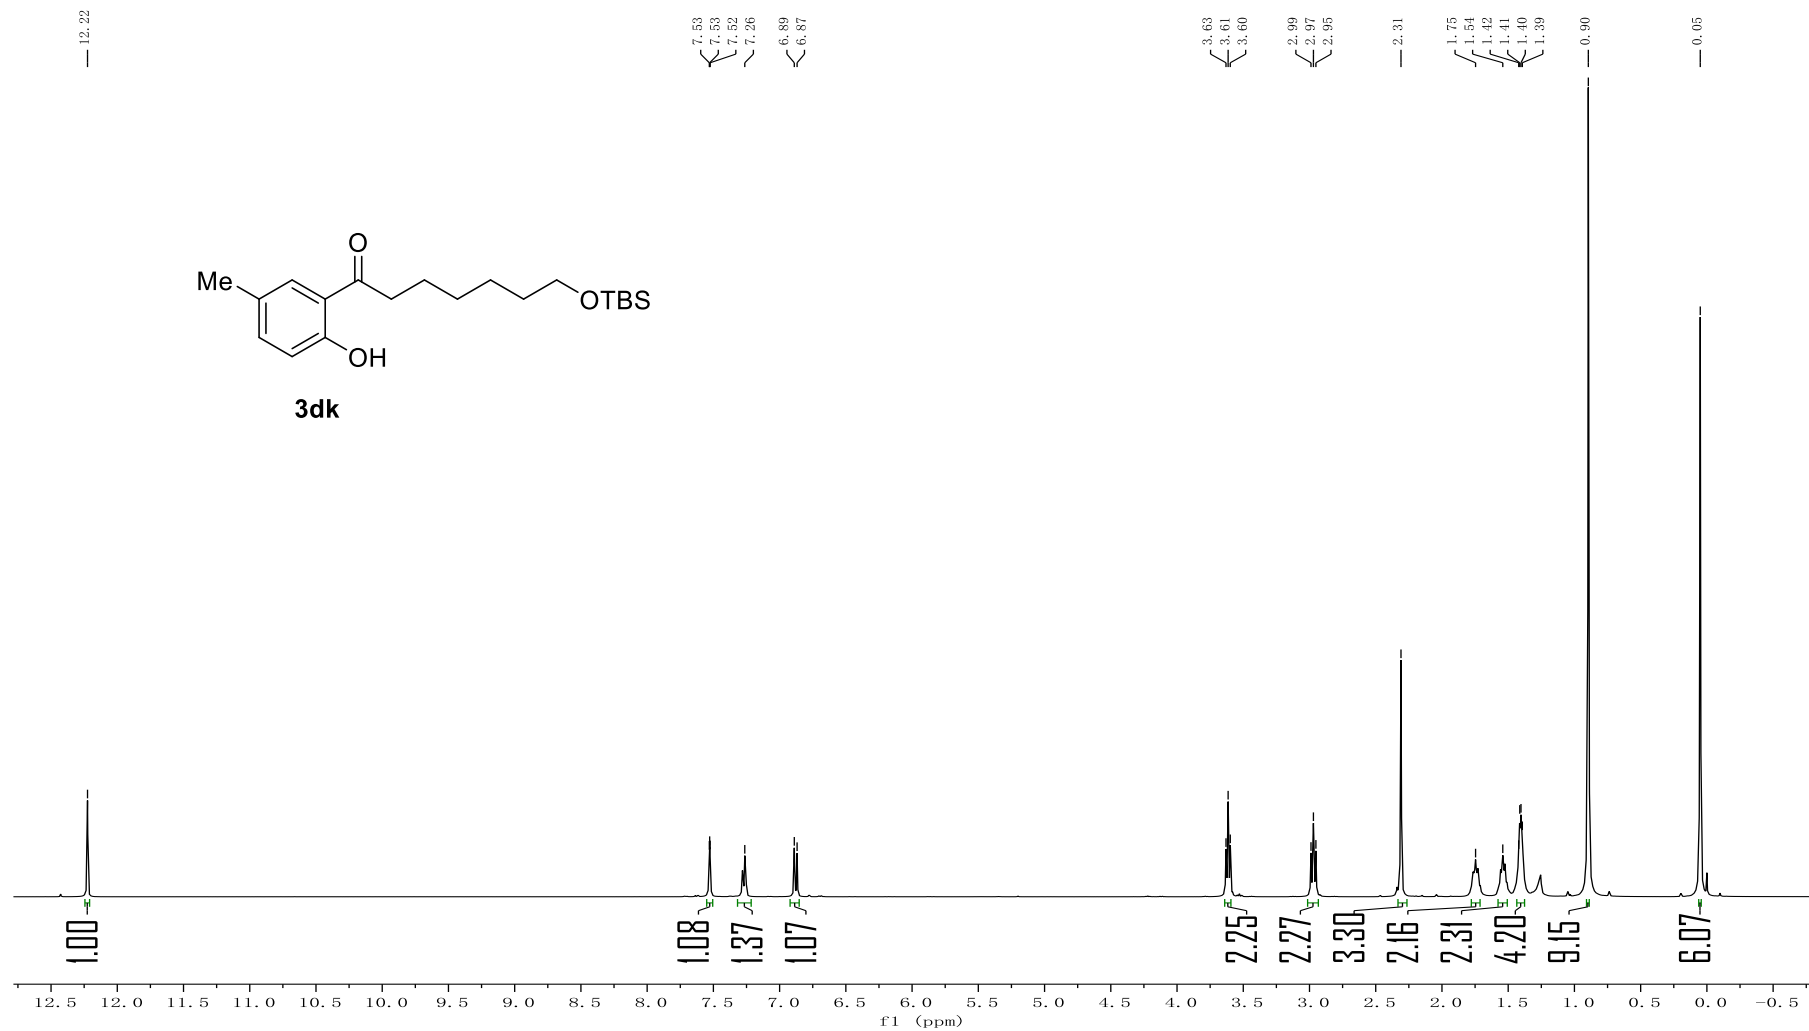

$^{13}\text{C}$  NMR-spectrum (101 MHz,  $\text{CDCl}_3$ ) of **3dk**

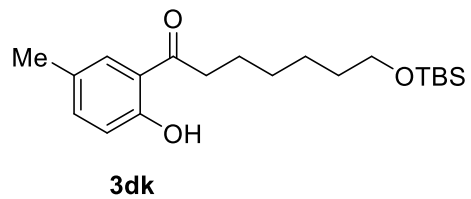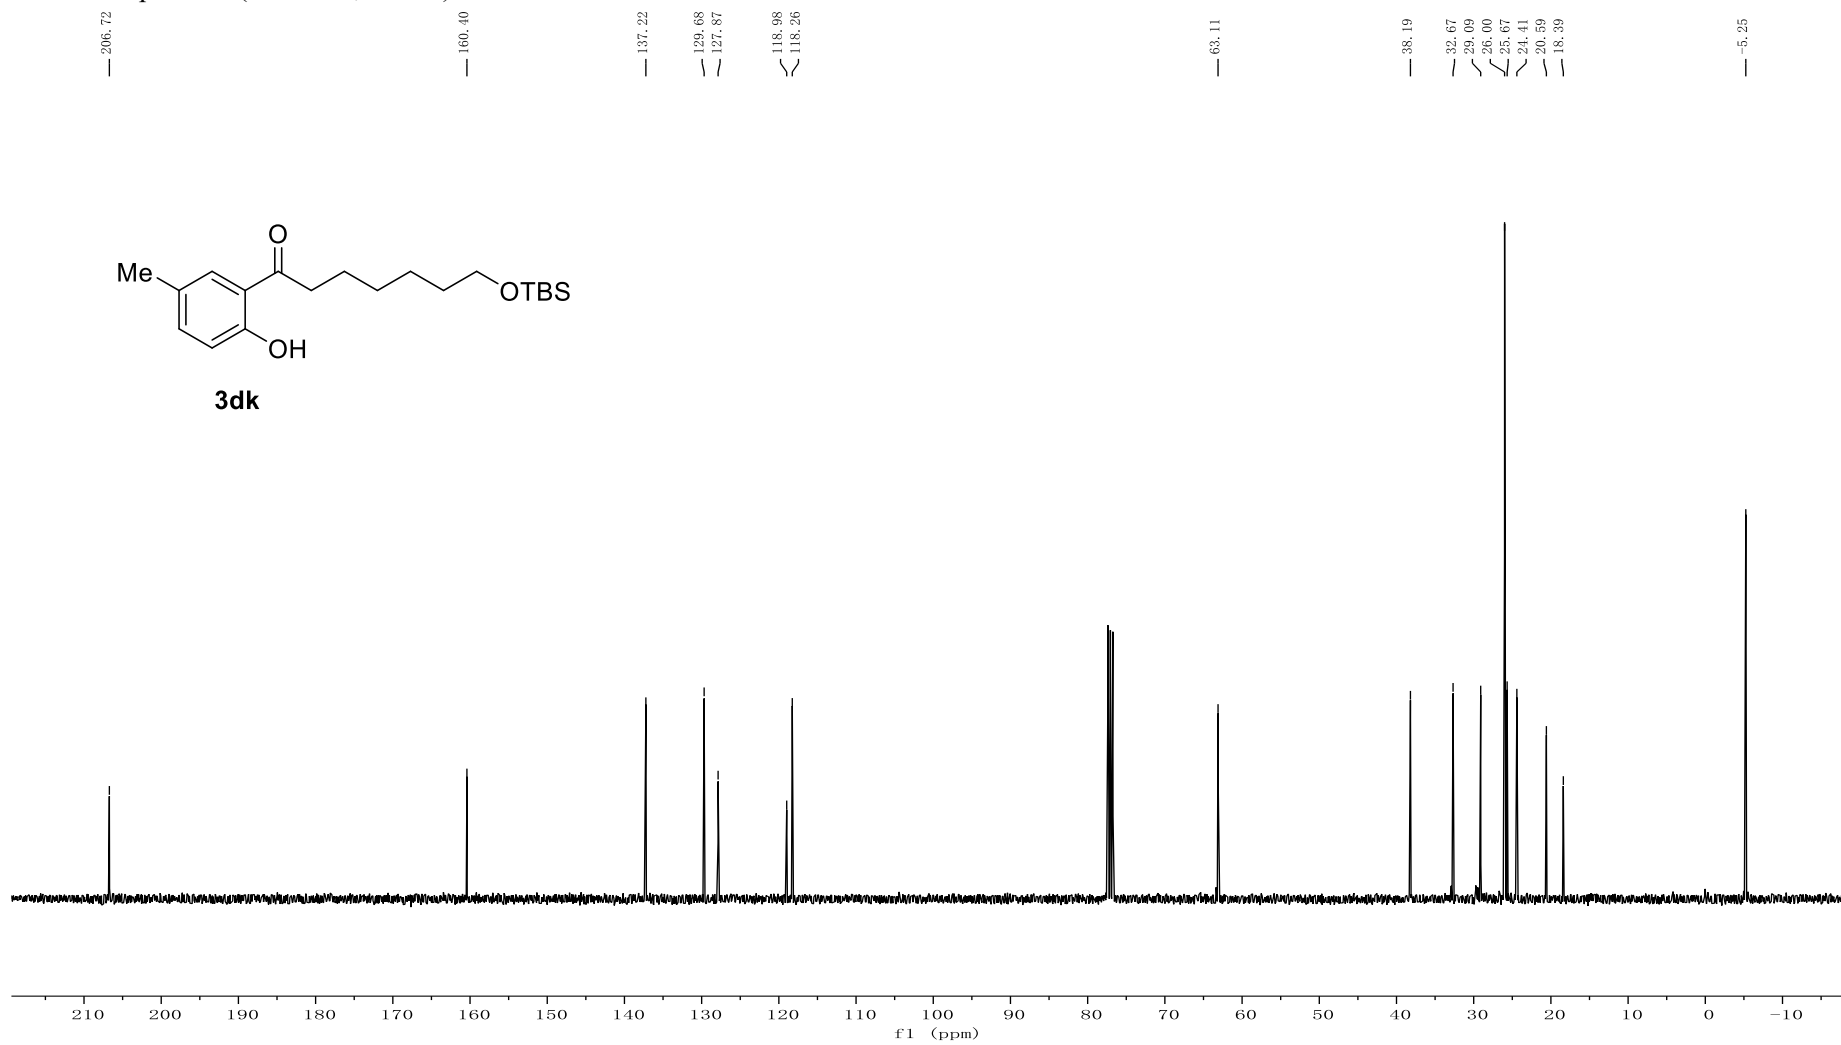

$^1\text{H}$  NMR-spectrum (400 MHz,  $\text{CDCl}_3$ ) of **3ek**

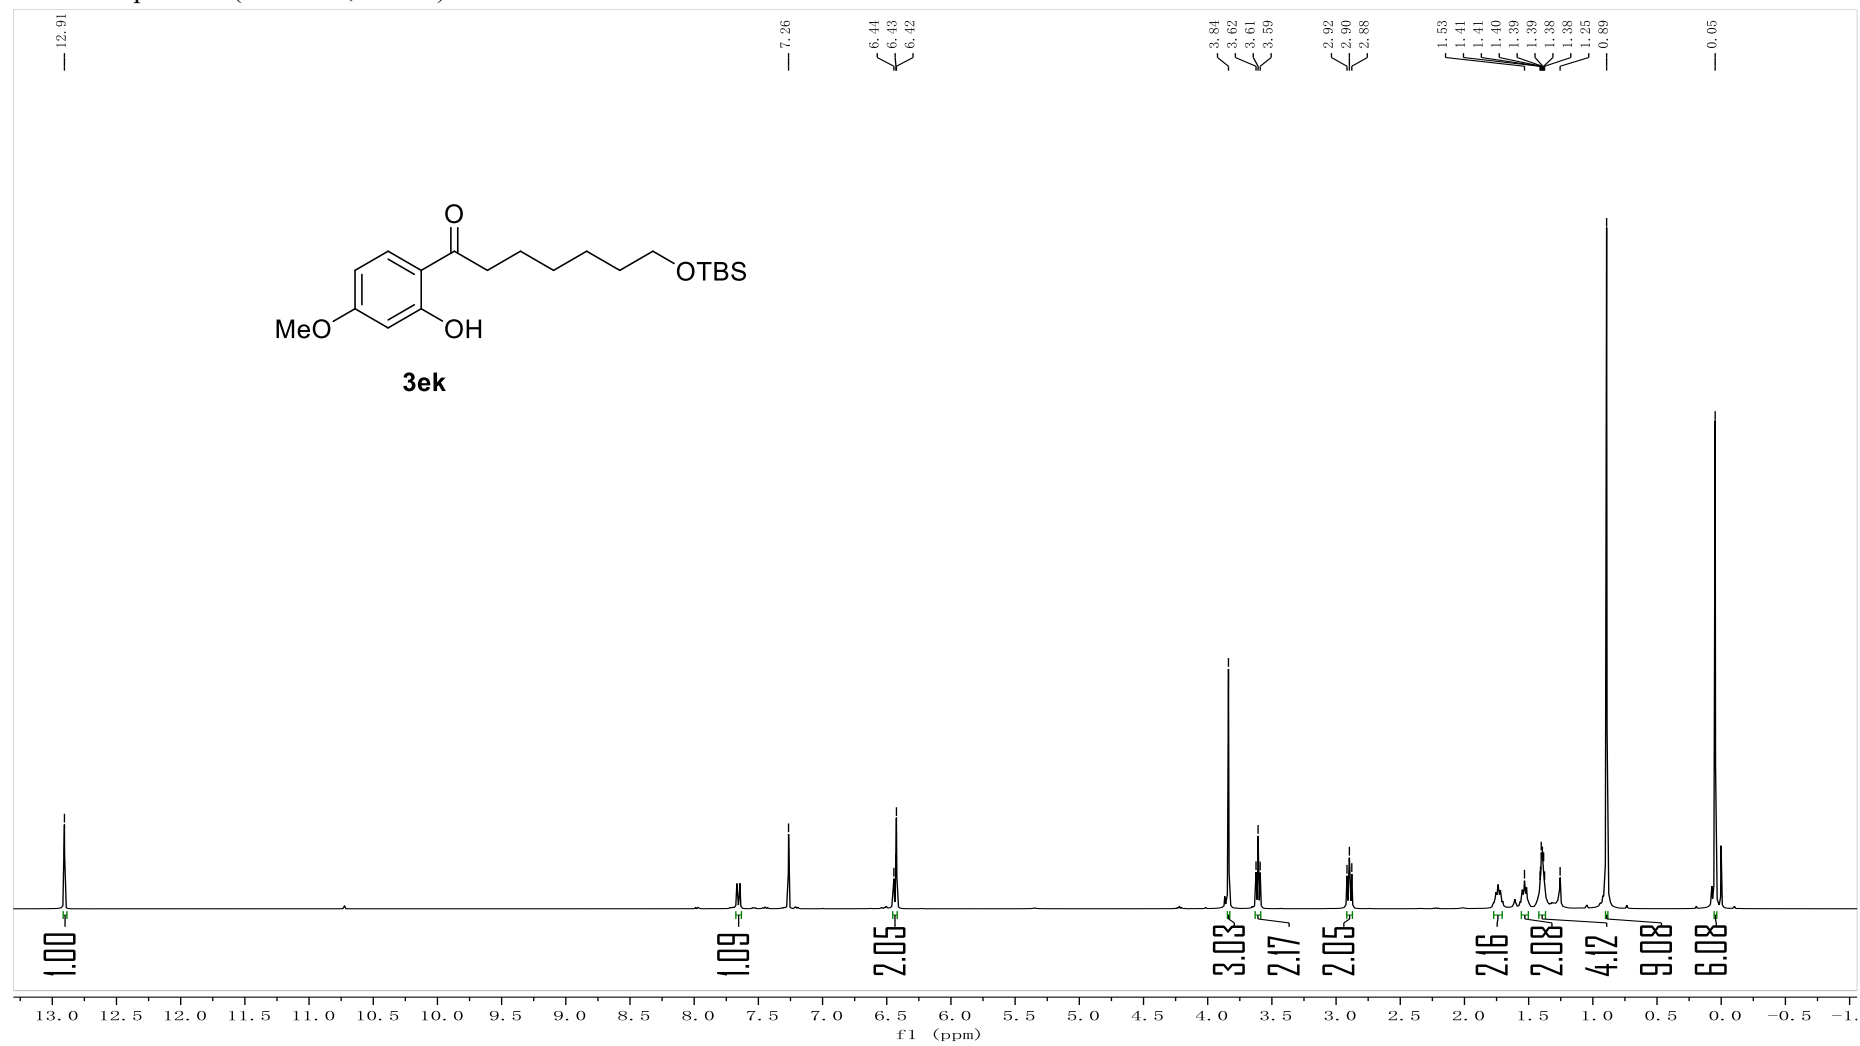

Chemical structure of compound **3ek** is shown above the spectrum:

COc1ccc(cc1C(=O)CCCCCO[Si](C)(C)C)O

The spectrum displays the following chemical shifts (ppm):

| Chemical Shift (ppm) |
|----------------------|
| 205.10               |
| 165.89               |
| 165.44               |
| 131.61               |
| 113.47               |
| 107.56               |
| 100.93               |
| 63.14                |
| 55.56                |
| 37.95                |
| 32.68                |
| 29.18                |
| 26.00                |
| 25.67                |
| 24.86                |
| 18.40                |
| -5.25                |



$^1\text{H}$  NMR-spectrum (400 MHz,  $\text{CDCl}_3$ ) of **3fk**

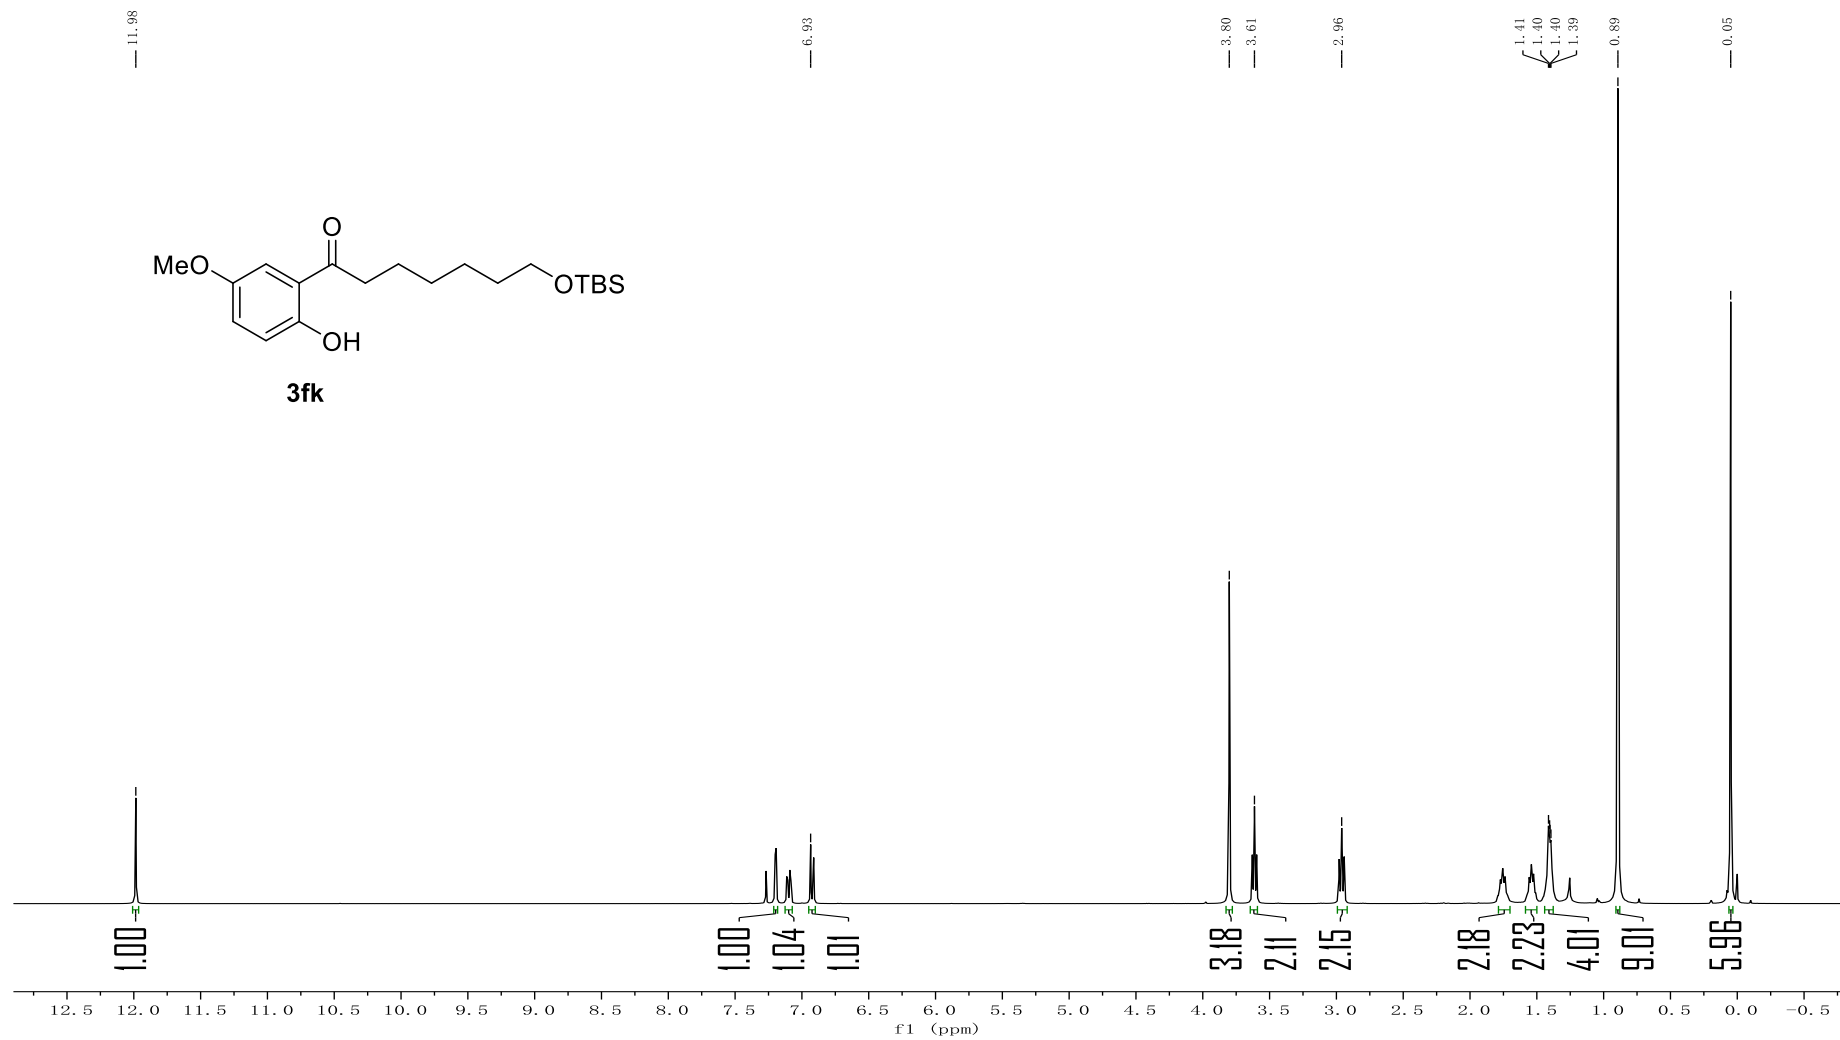

<sup>13</sup>C NMR-spectrum (101 MHz, CDCl<sub>3</sub>) of **3fk**

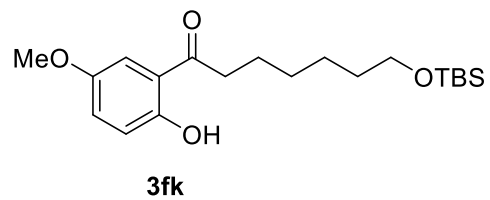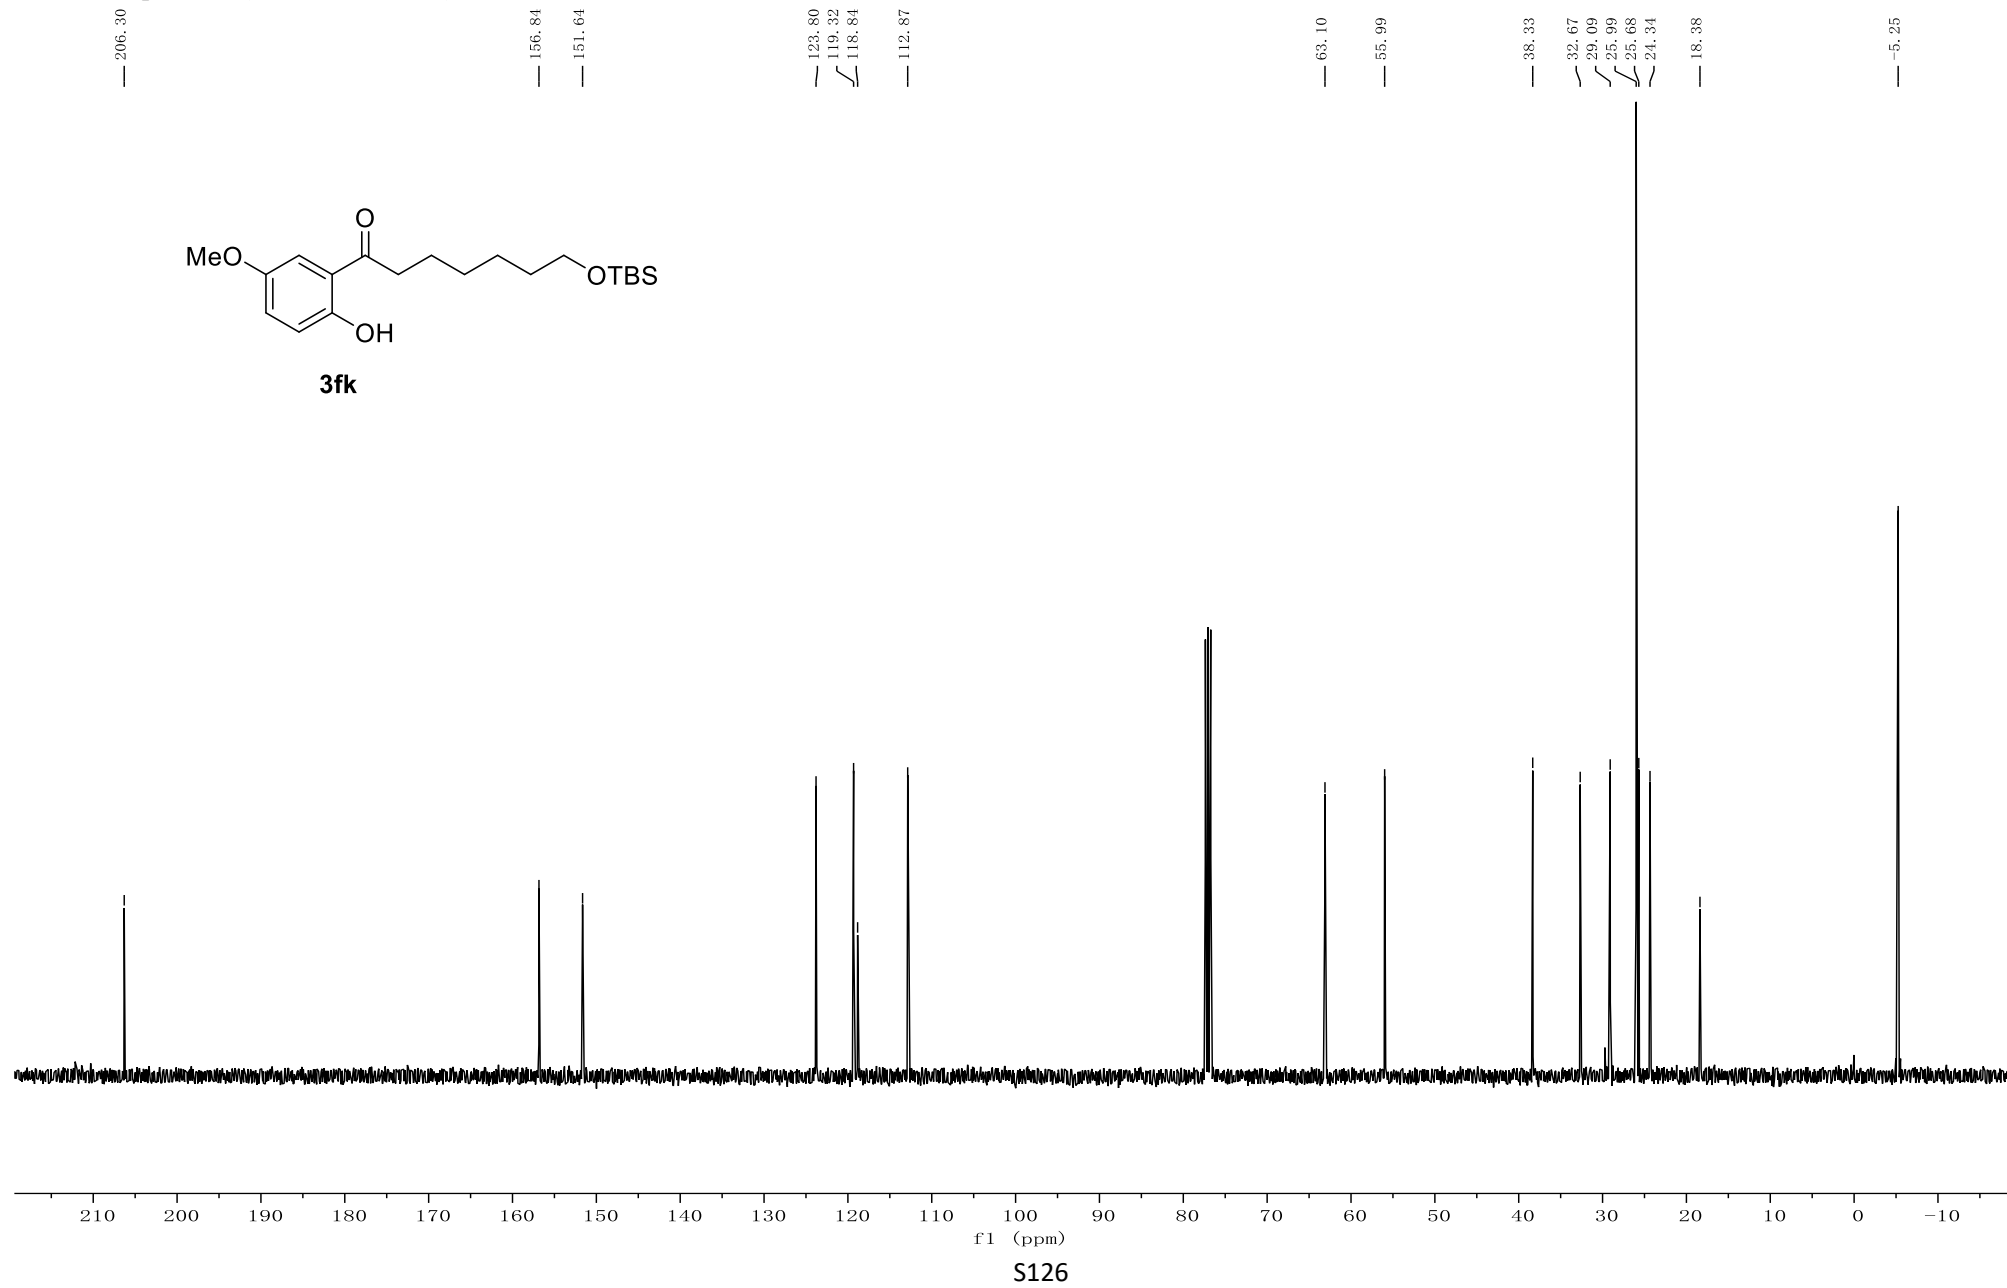

<sup>1</sup>H NMR-spectrum (400 MHz, CDCl<sub>3</sub>) of **3gk**

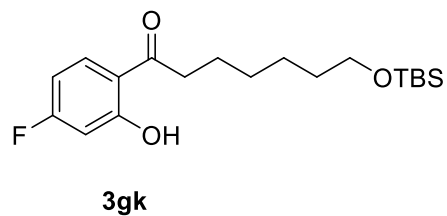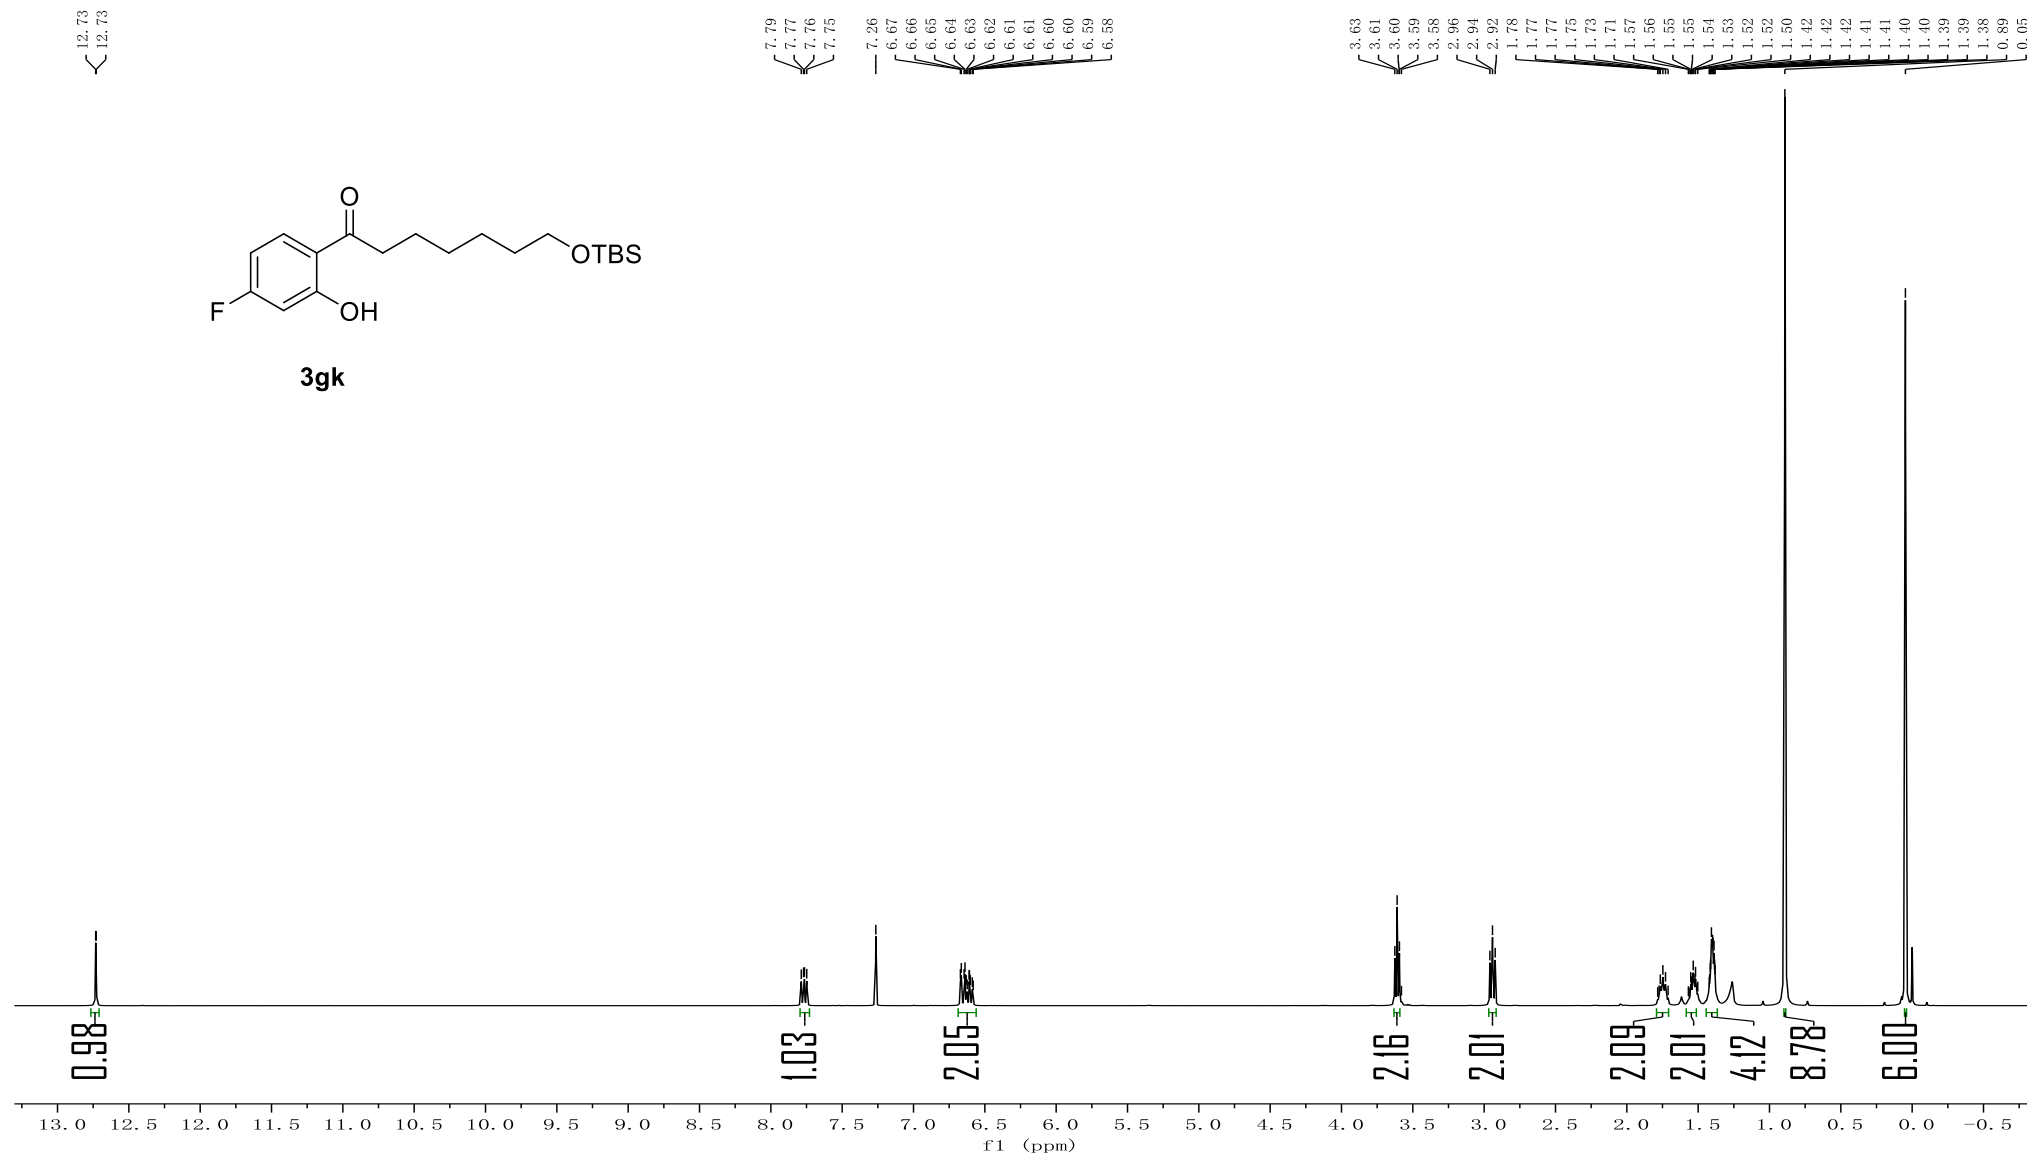

$^{13}\text{C}$  NMR-spectrum (101 MHz,  $\text{CDCl}_3$ ) of **3gk**

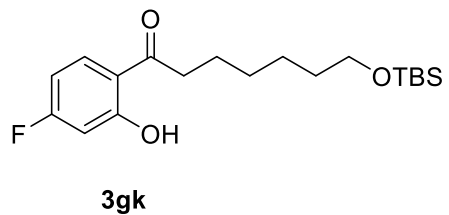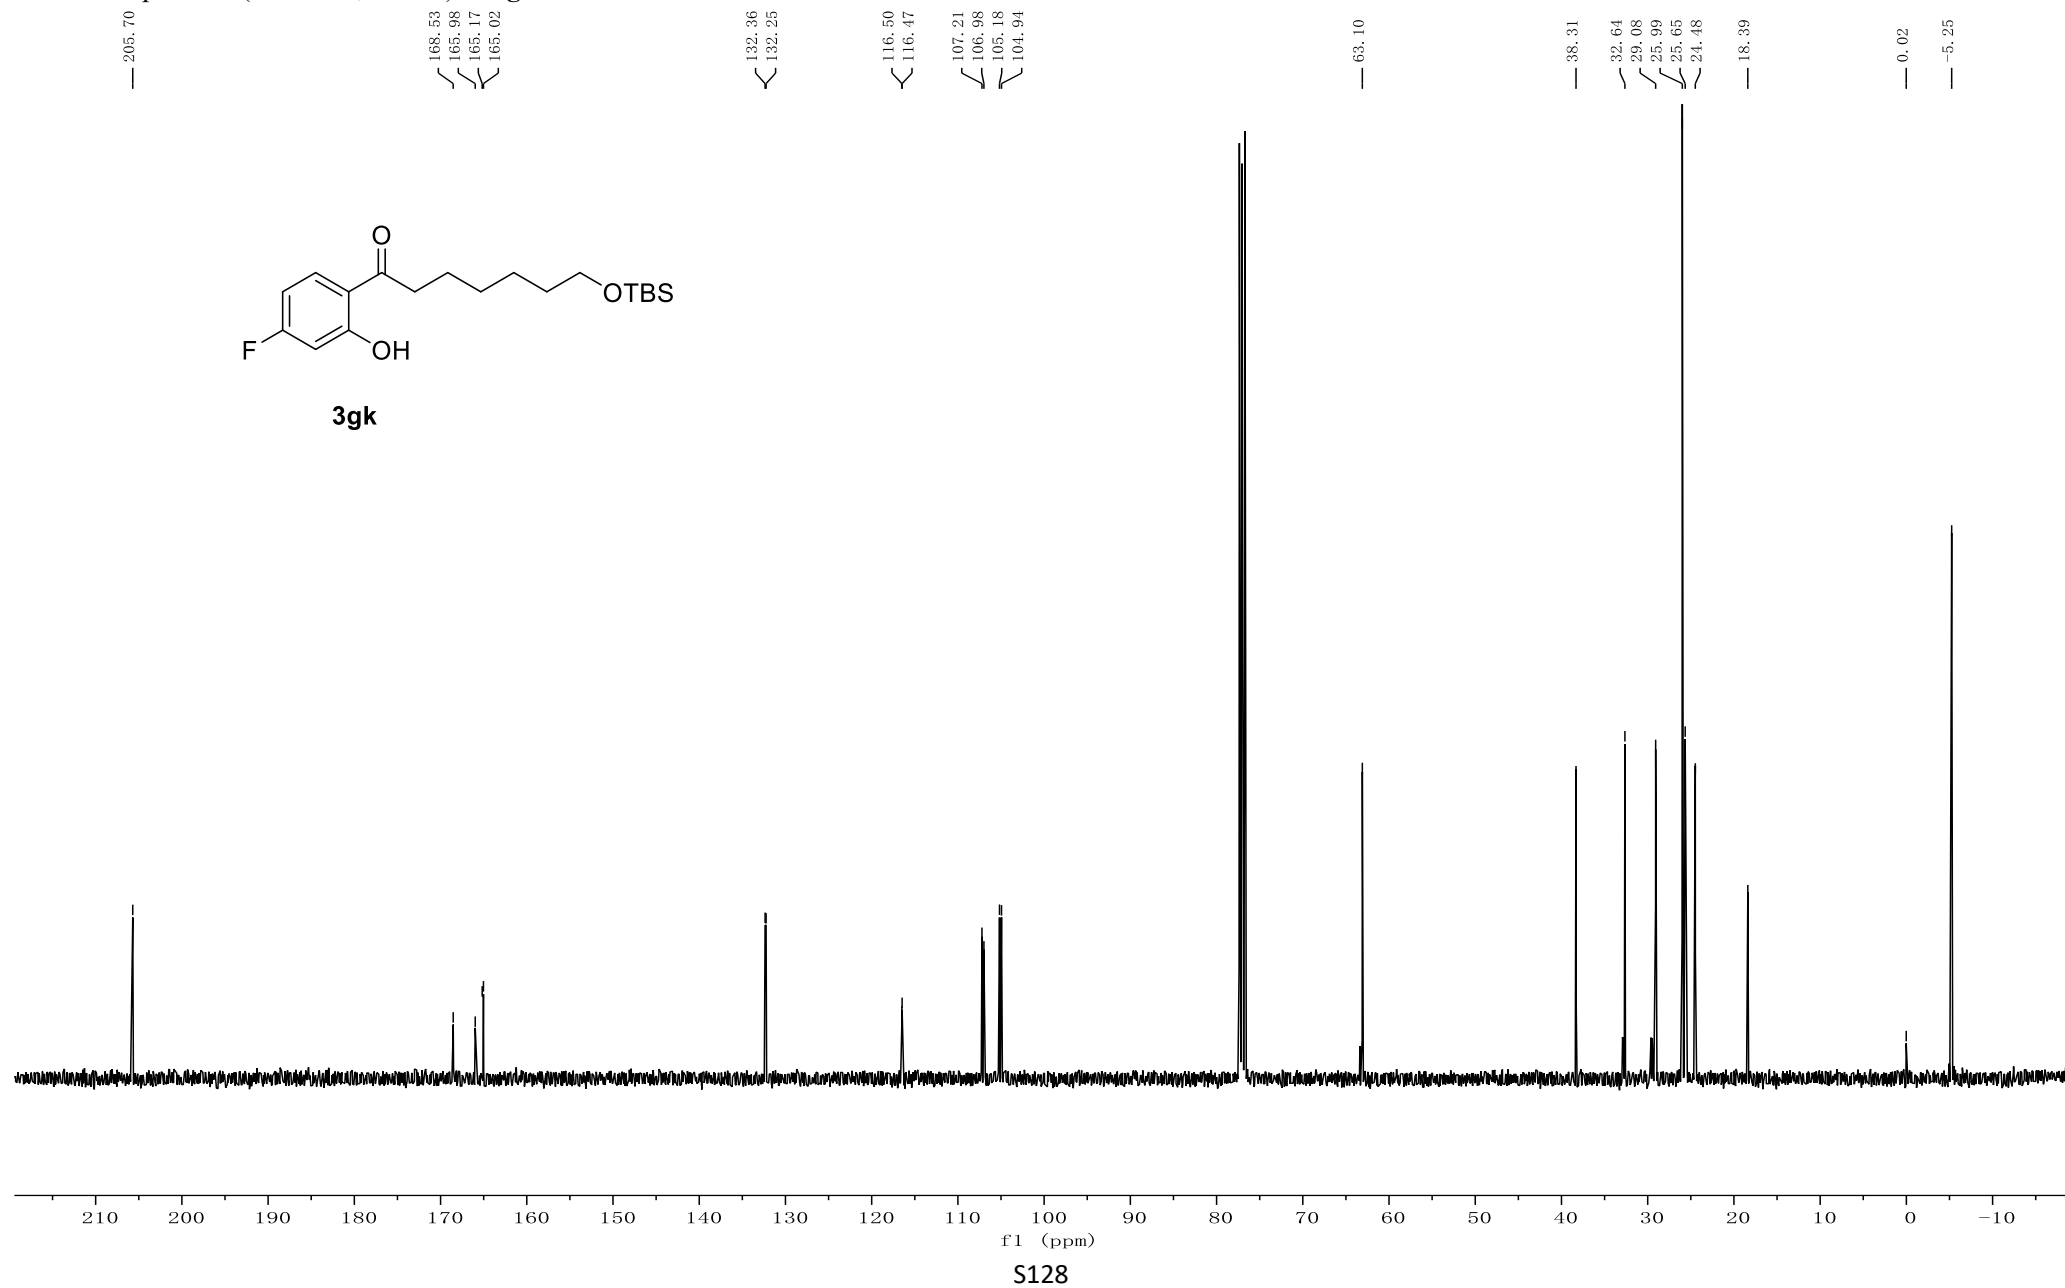

$^{19}\text{F}$  NMR-spectrum (376 MHz,  $\text{CDCl}_3$ ) of **3gk**

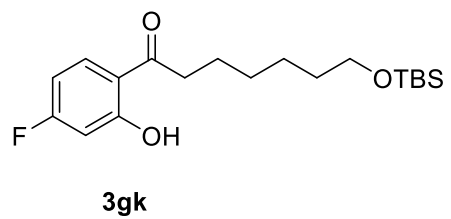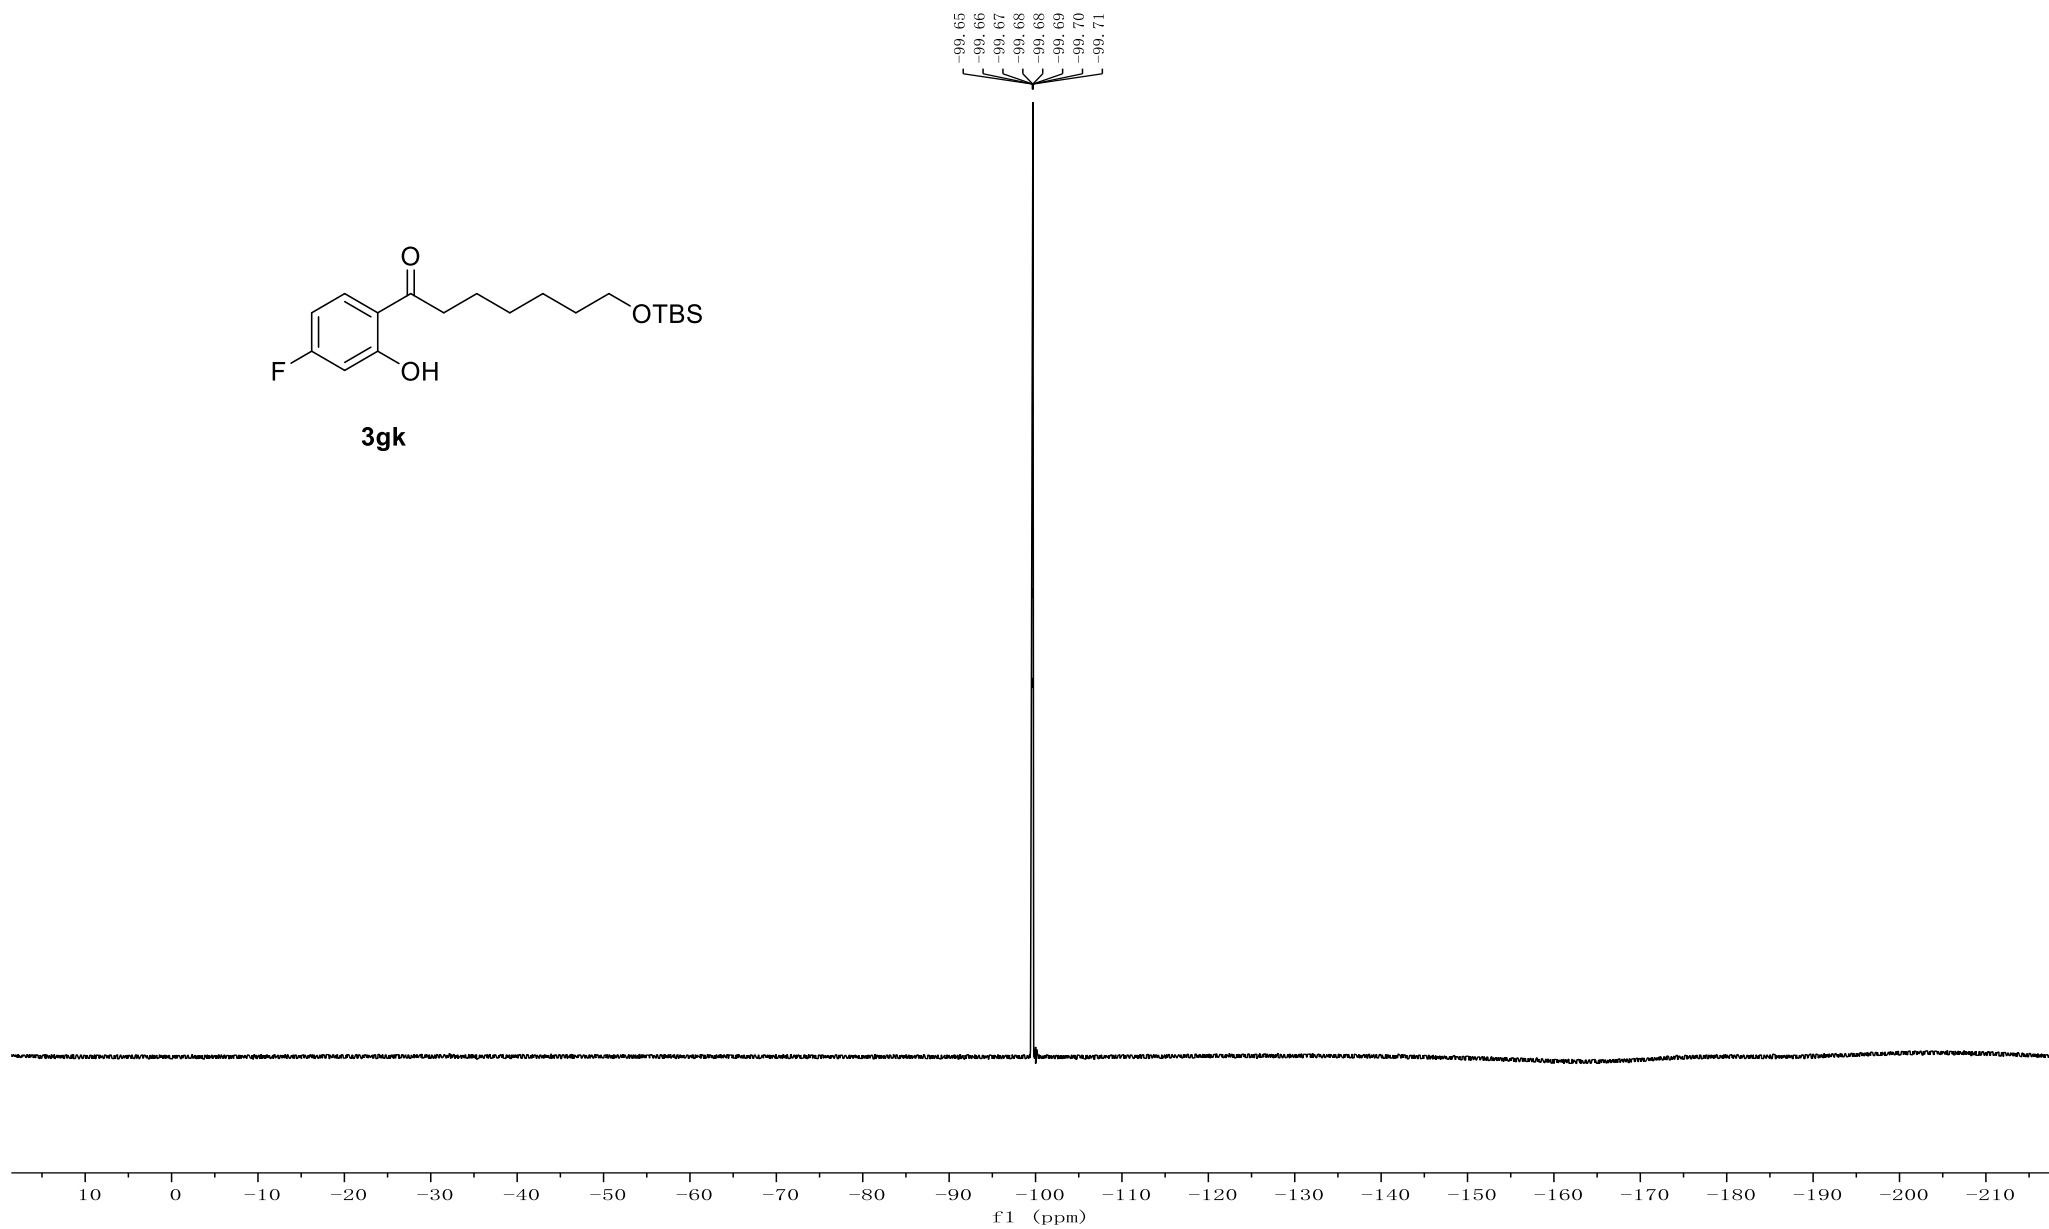

S129

<sup>1</sup>H NMR-spectrum (400 MHz, CDCl<sub>3</sub>) of **3hk**

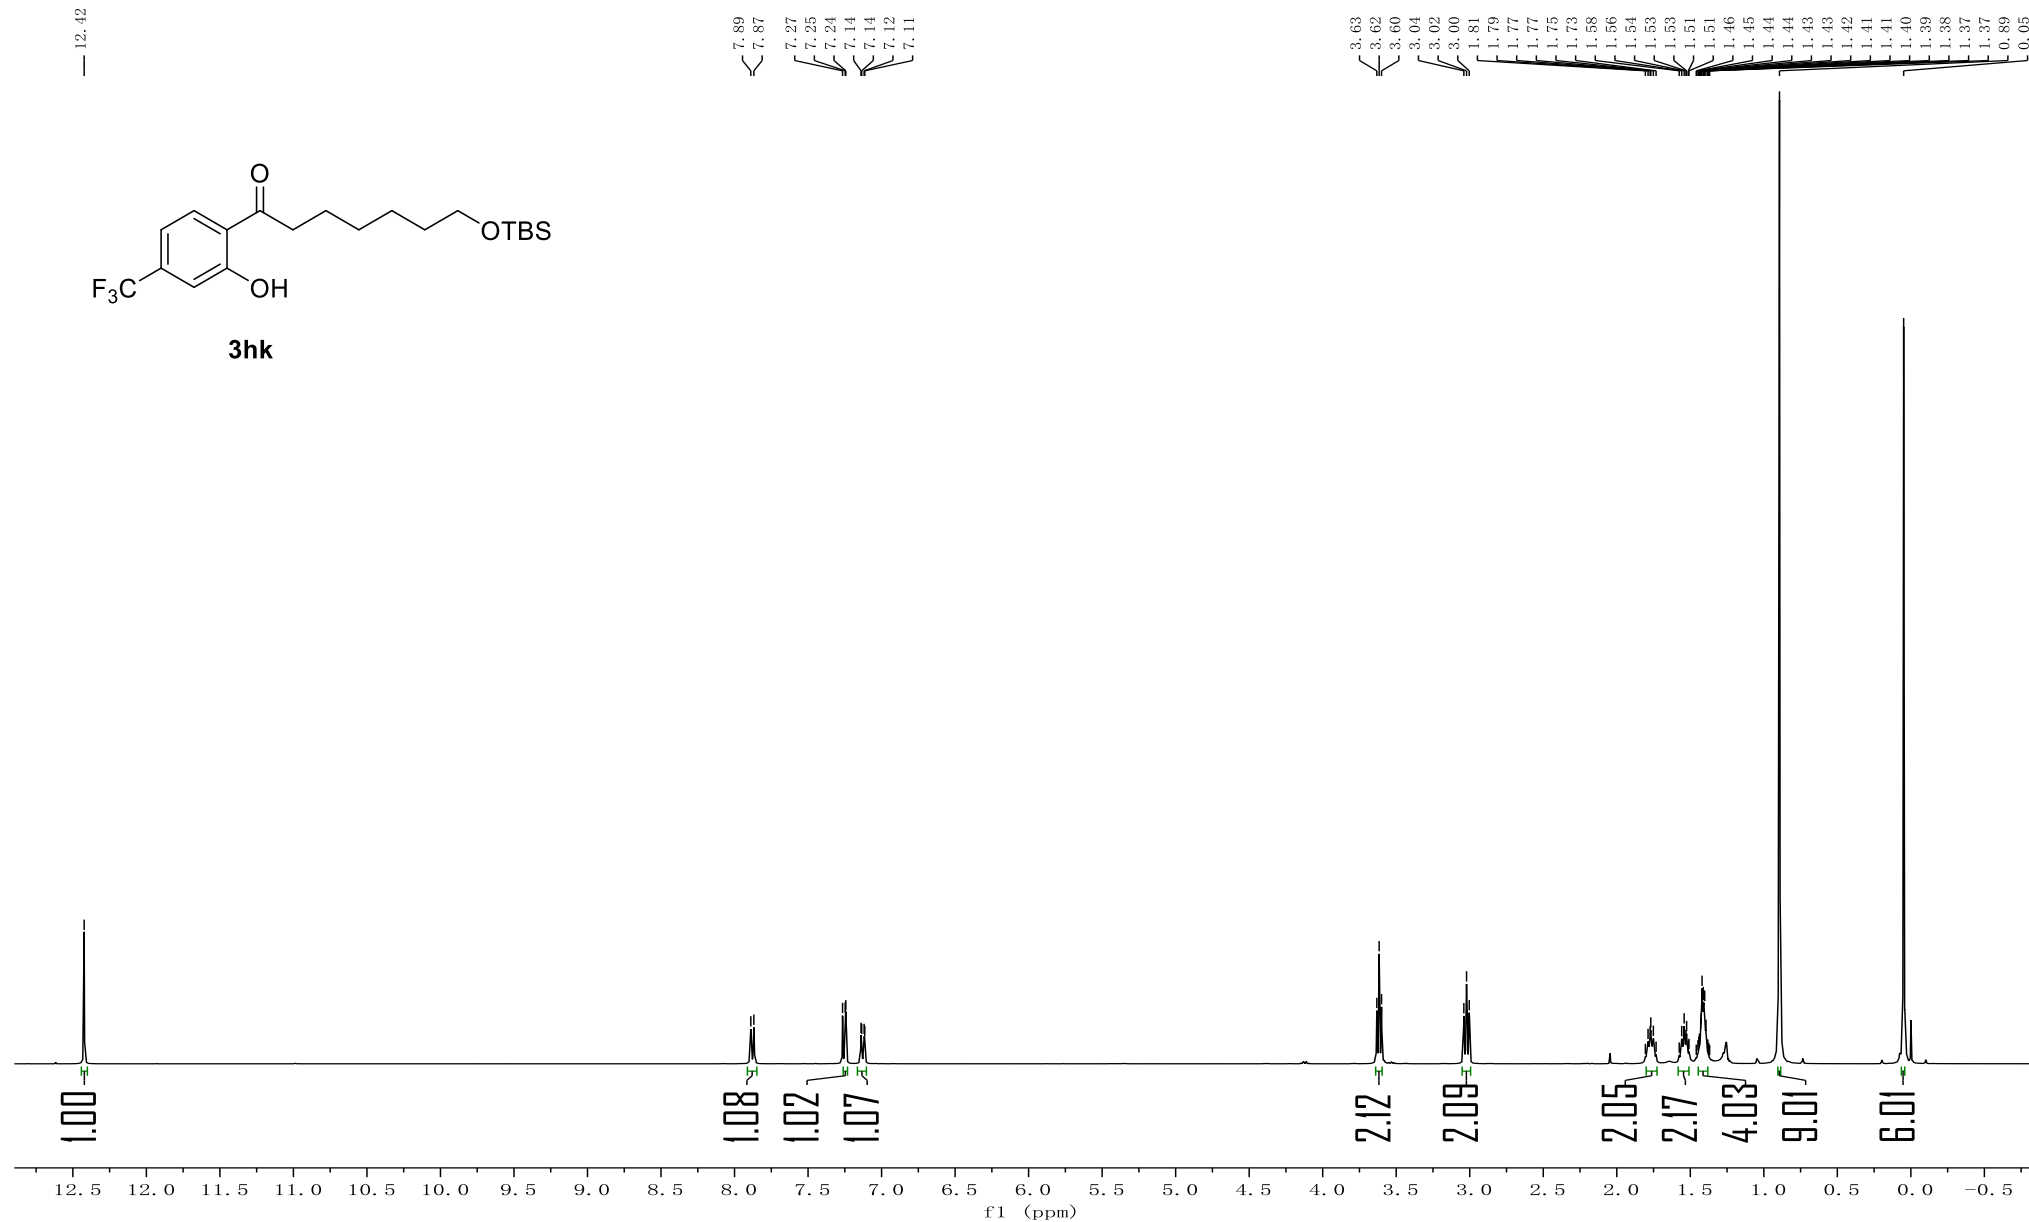

<sup>13</sup>C NMR-spectrum (101 MHz, CDCl<sub>3</sub>) of **3hk**

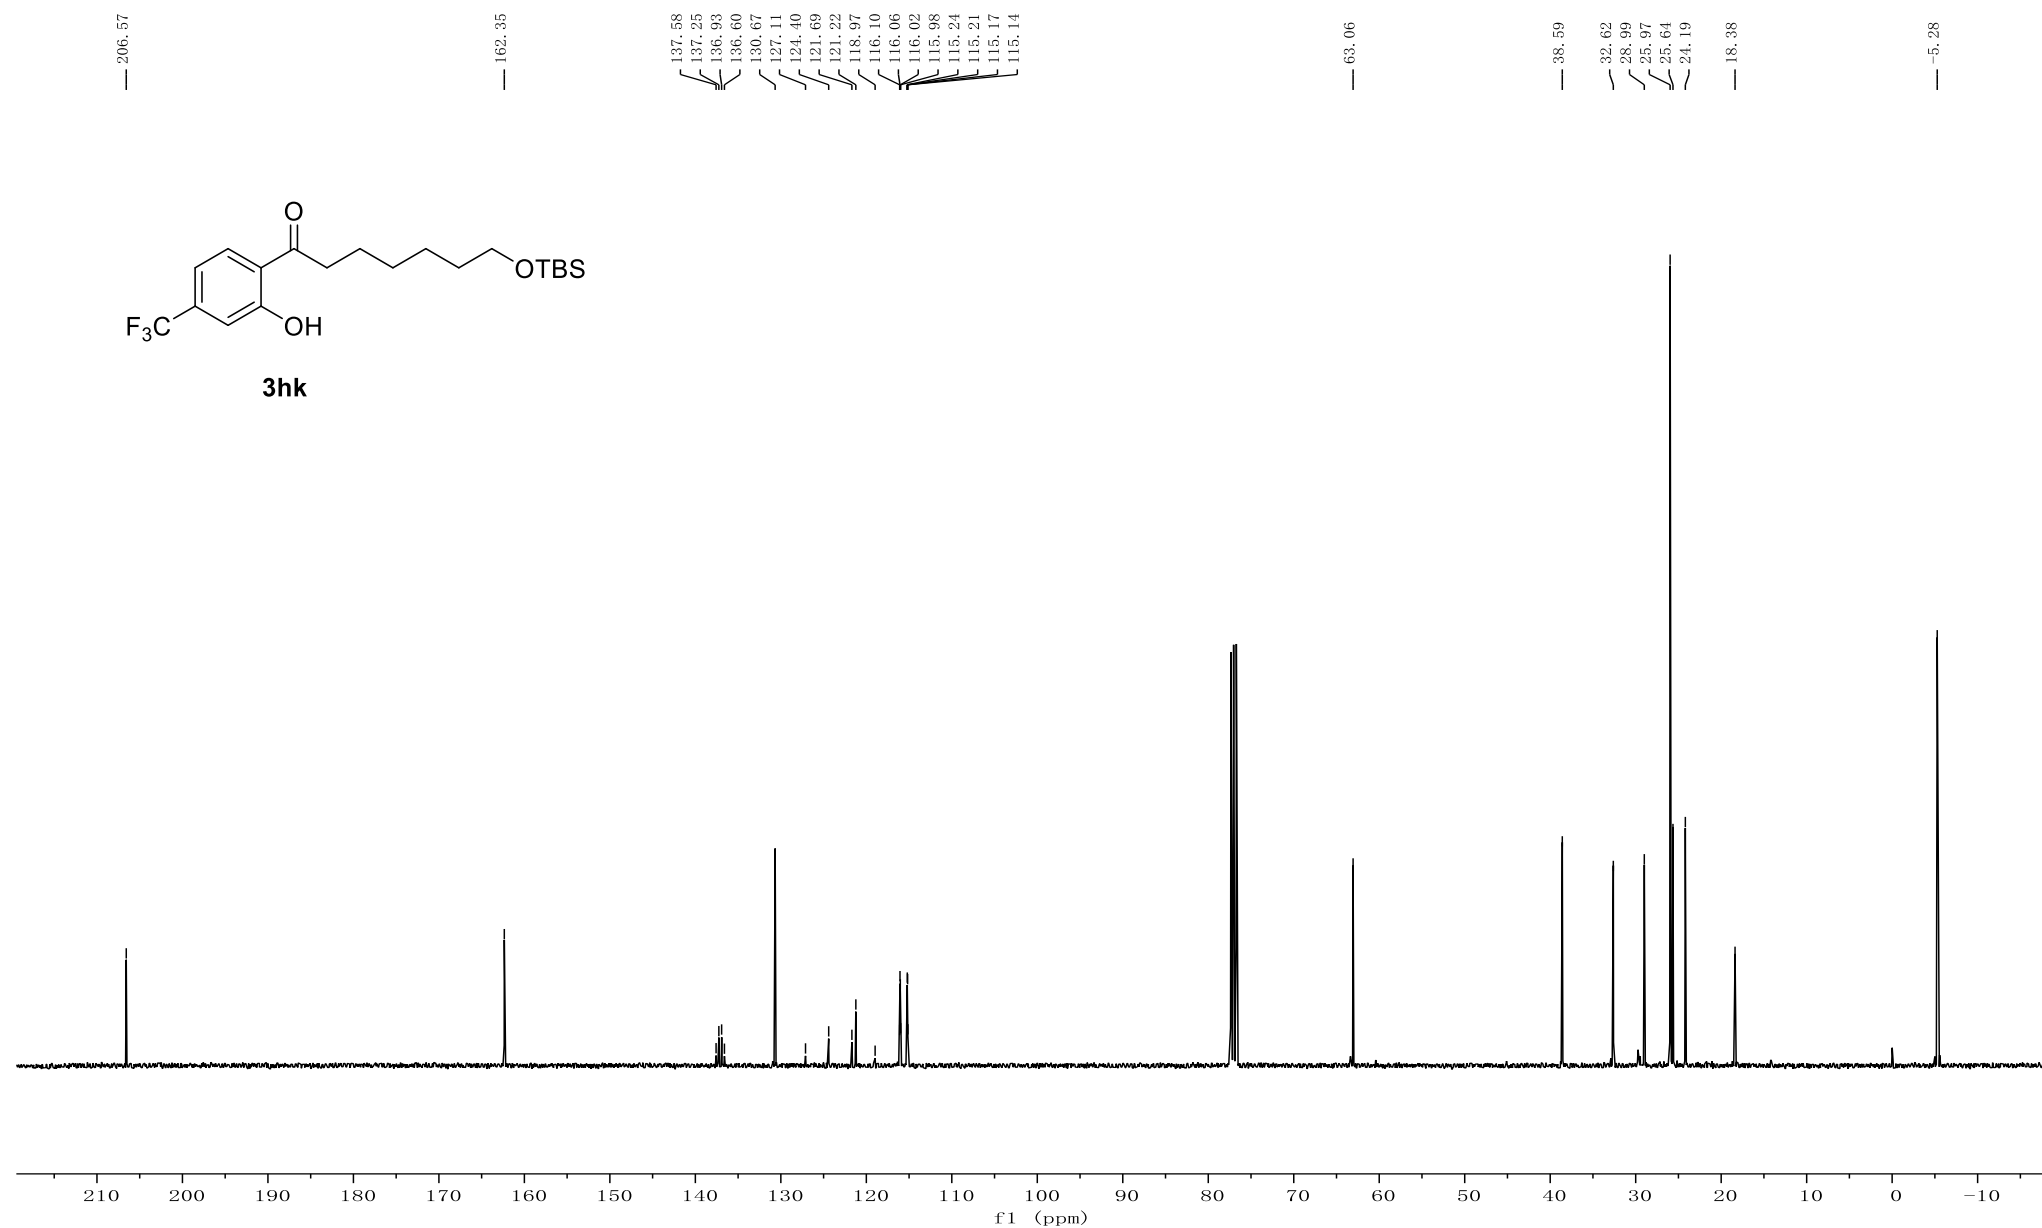

S131

$^{19}\text{F}$  NMR-spectrum (376 MHz,  $\text{CDCl}_3$ ) of **3hk**

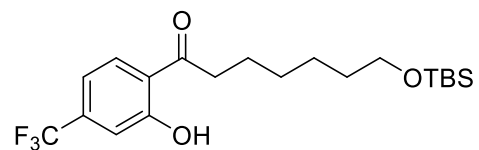

**3hk**

-63.91

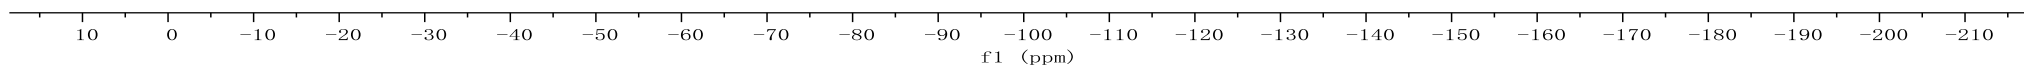

S132



<sup>1</sup>H NMR-spectrum (500 MHz, CDCl<sub>3</sub>) of **3ik**

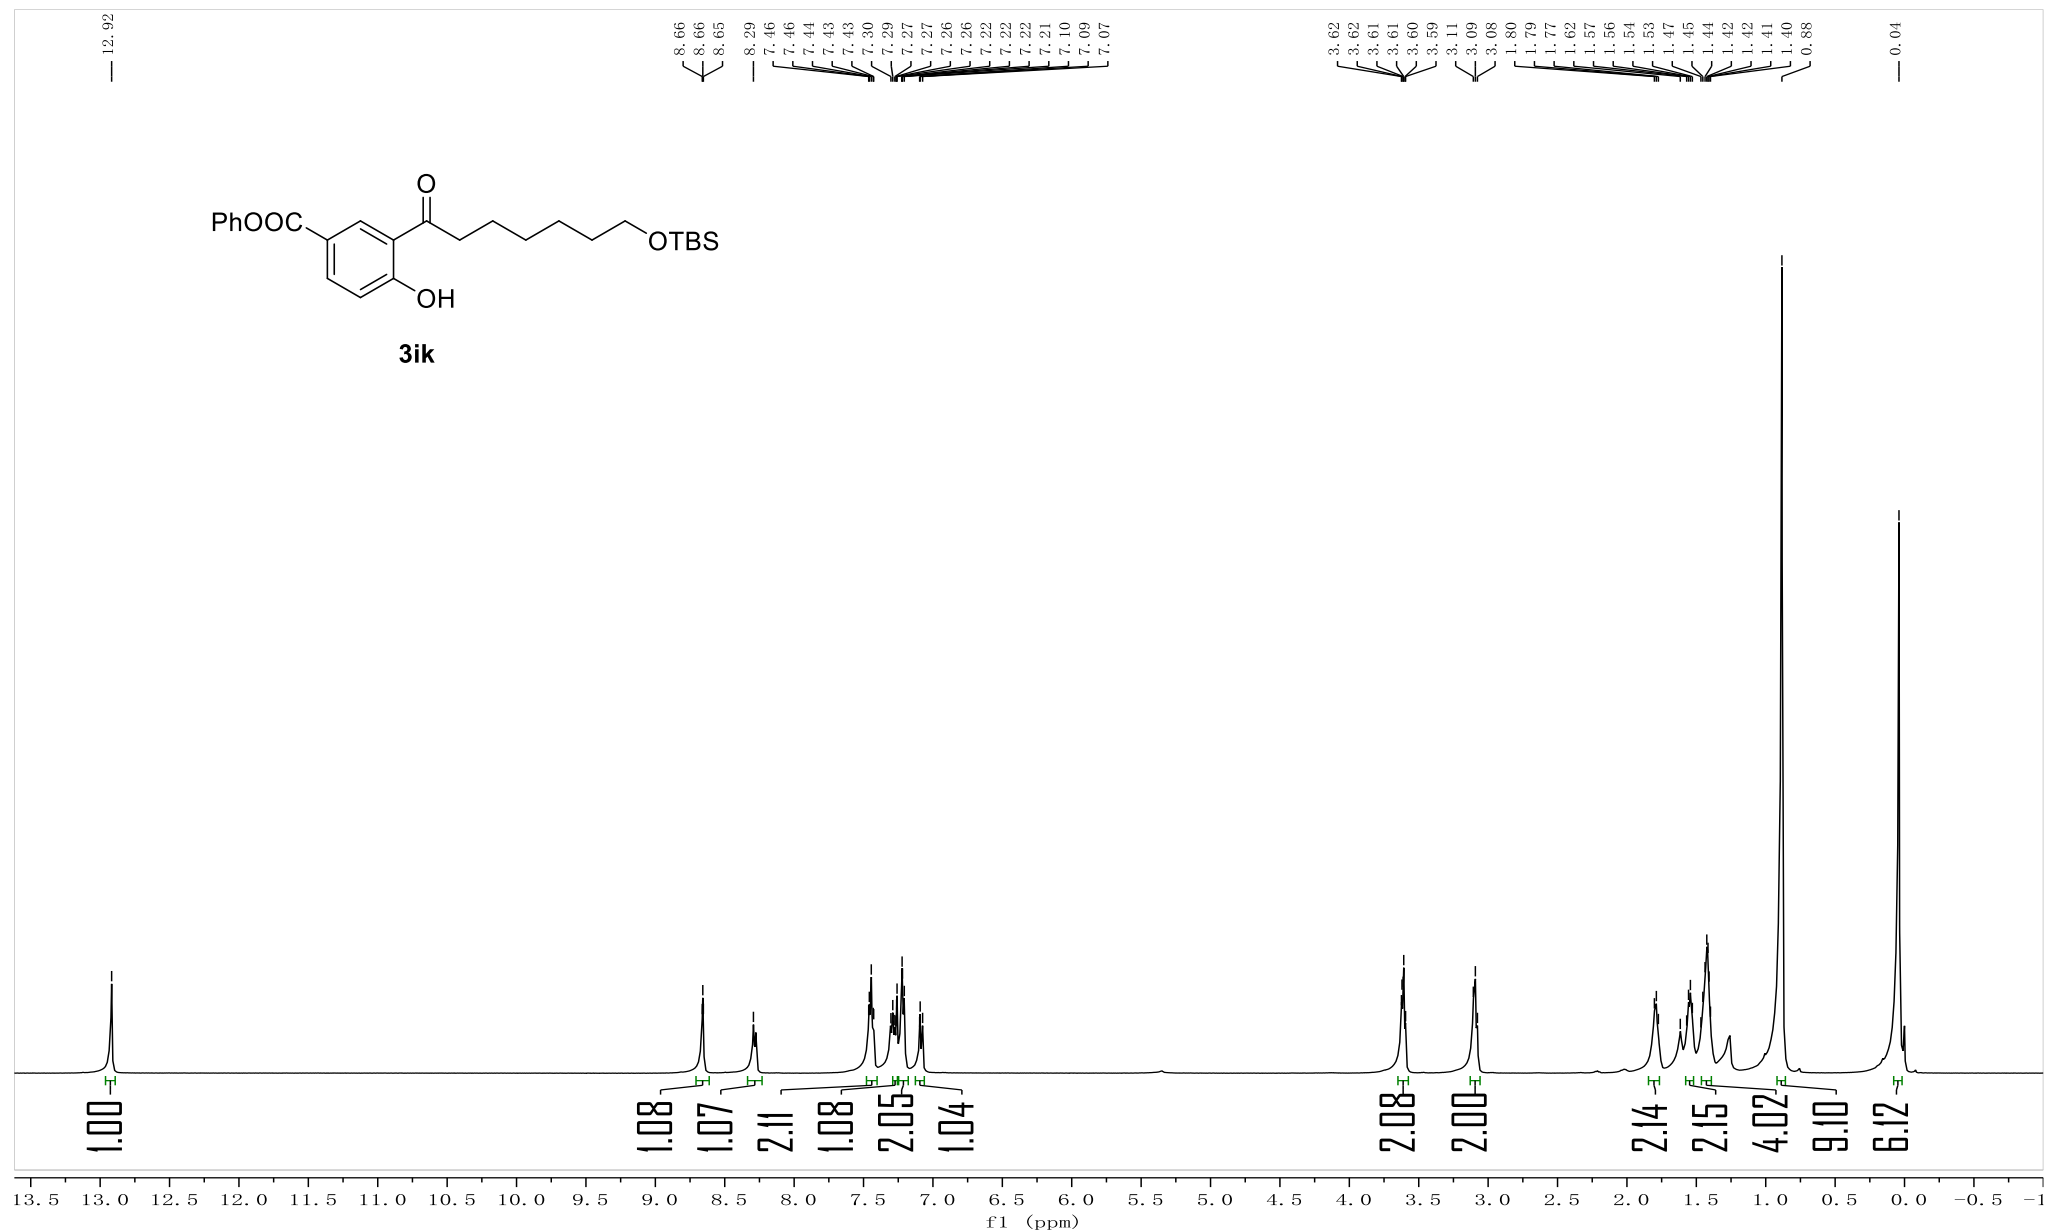

S133

$^{13}\text{C}$  NMR-spectrum (101 MHz,  $\text{CDCl}_3$ ) of **3ik**

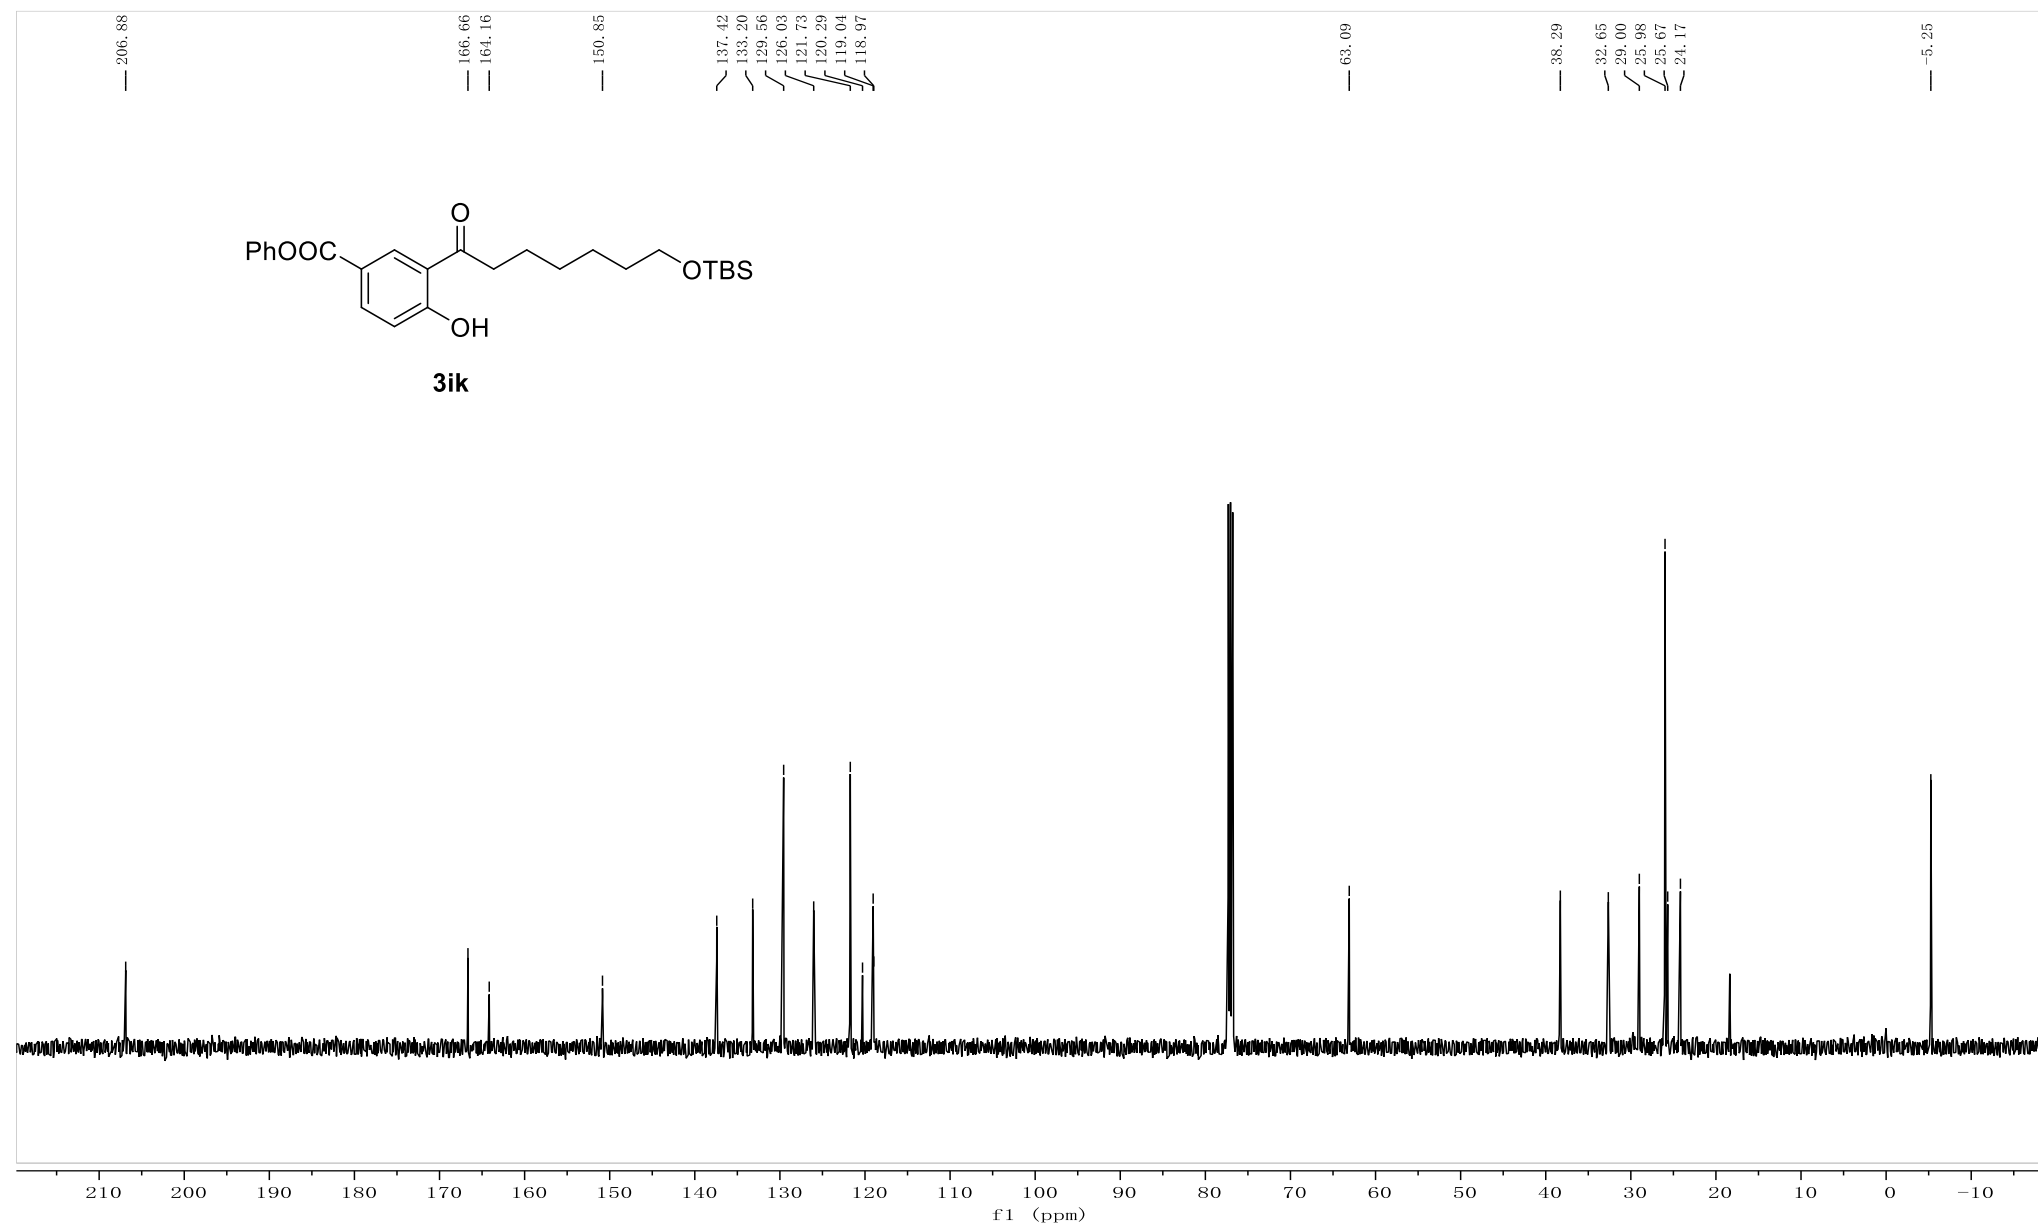

S134

COSY-spectrum of **3ik**

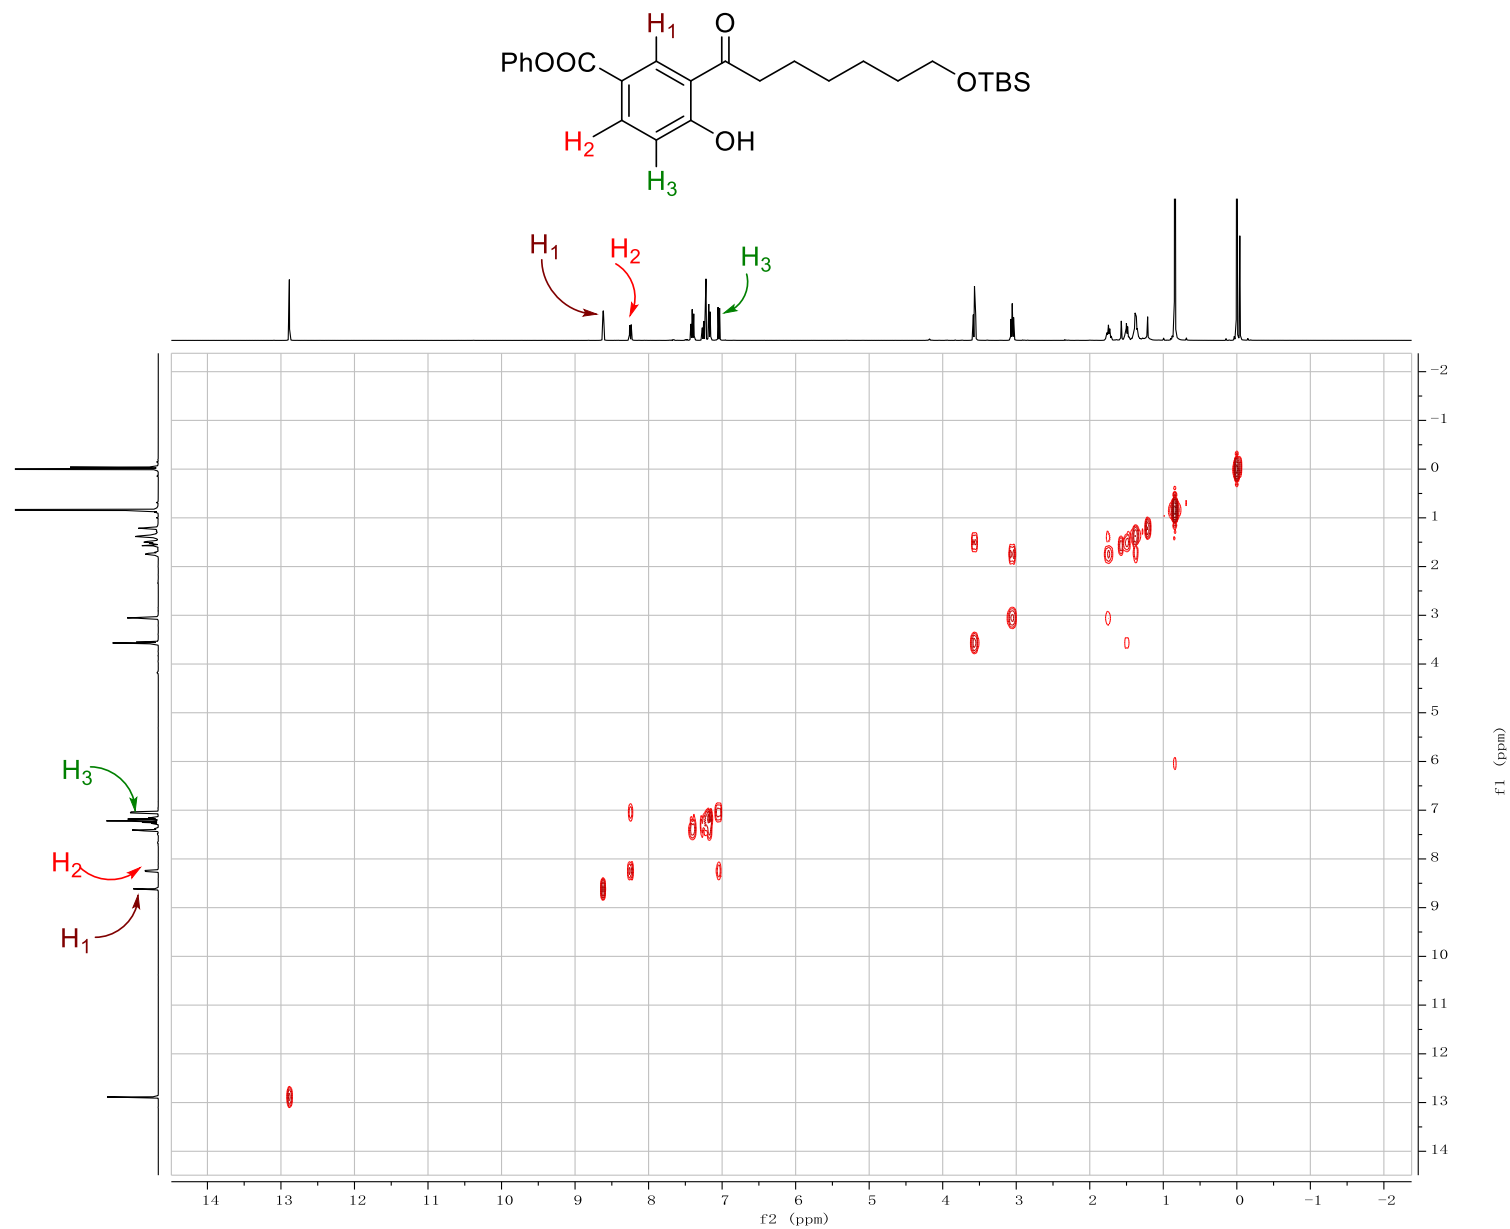

S135

HSQC-spectrum of **3ik**

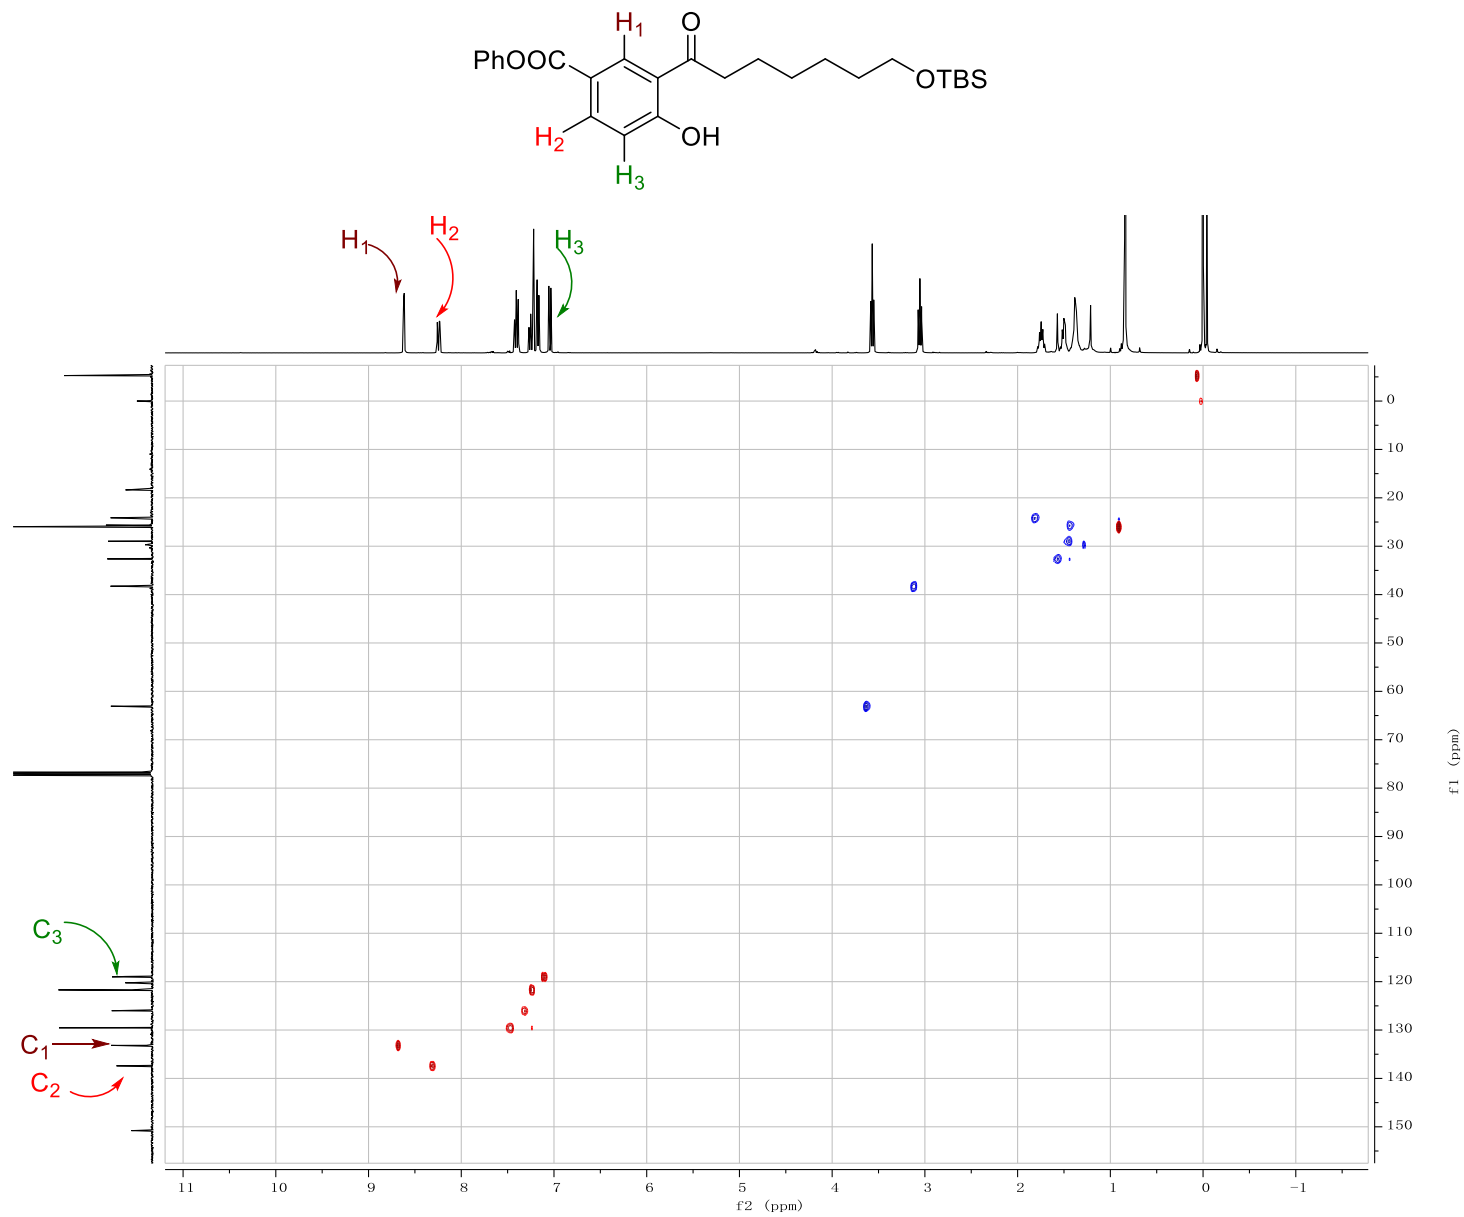

HMBC-spectrum of **3ik**

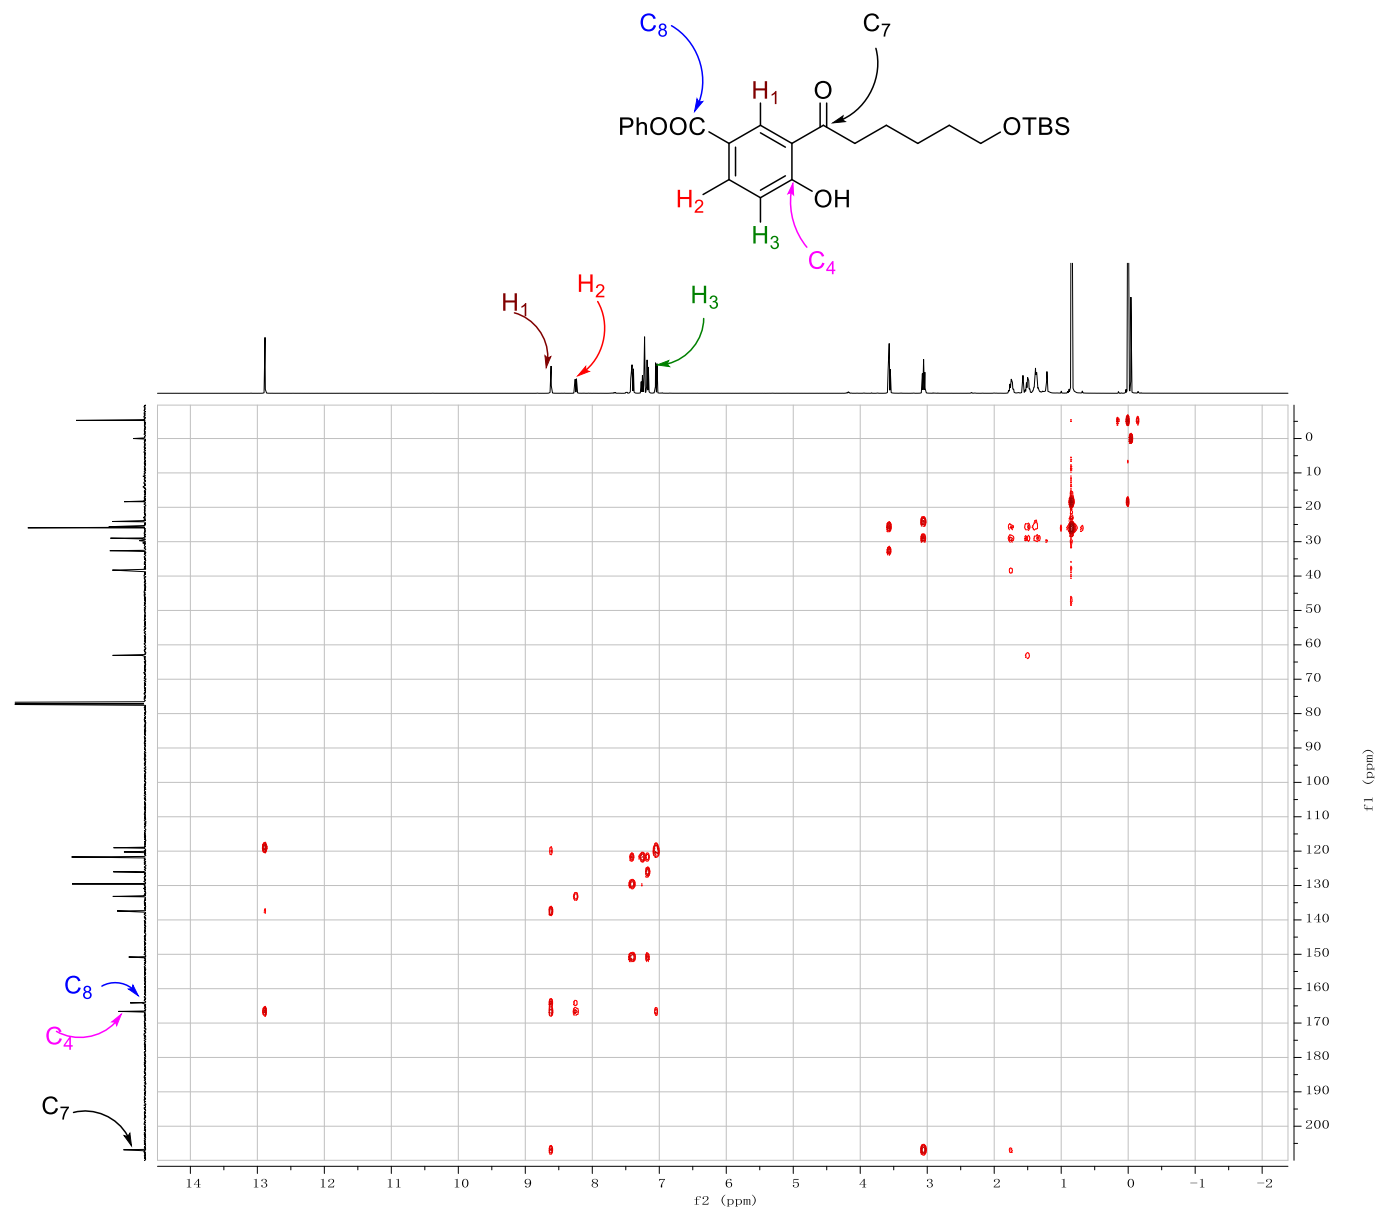

S137

<sup>1</sup>H NMR-spectrum (400 MHz, CDCl<sub>3</sub>) of **3jk**

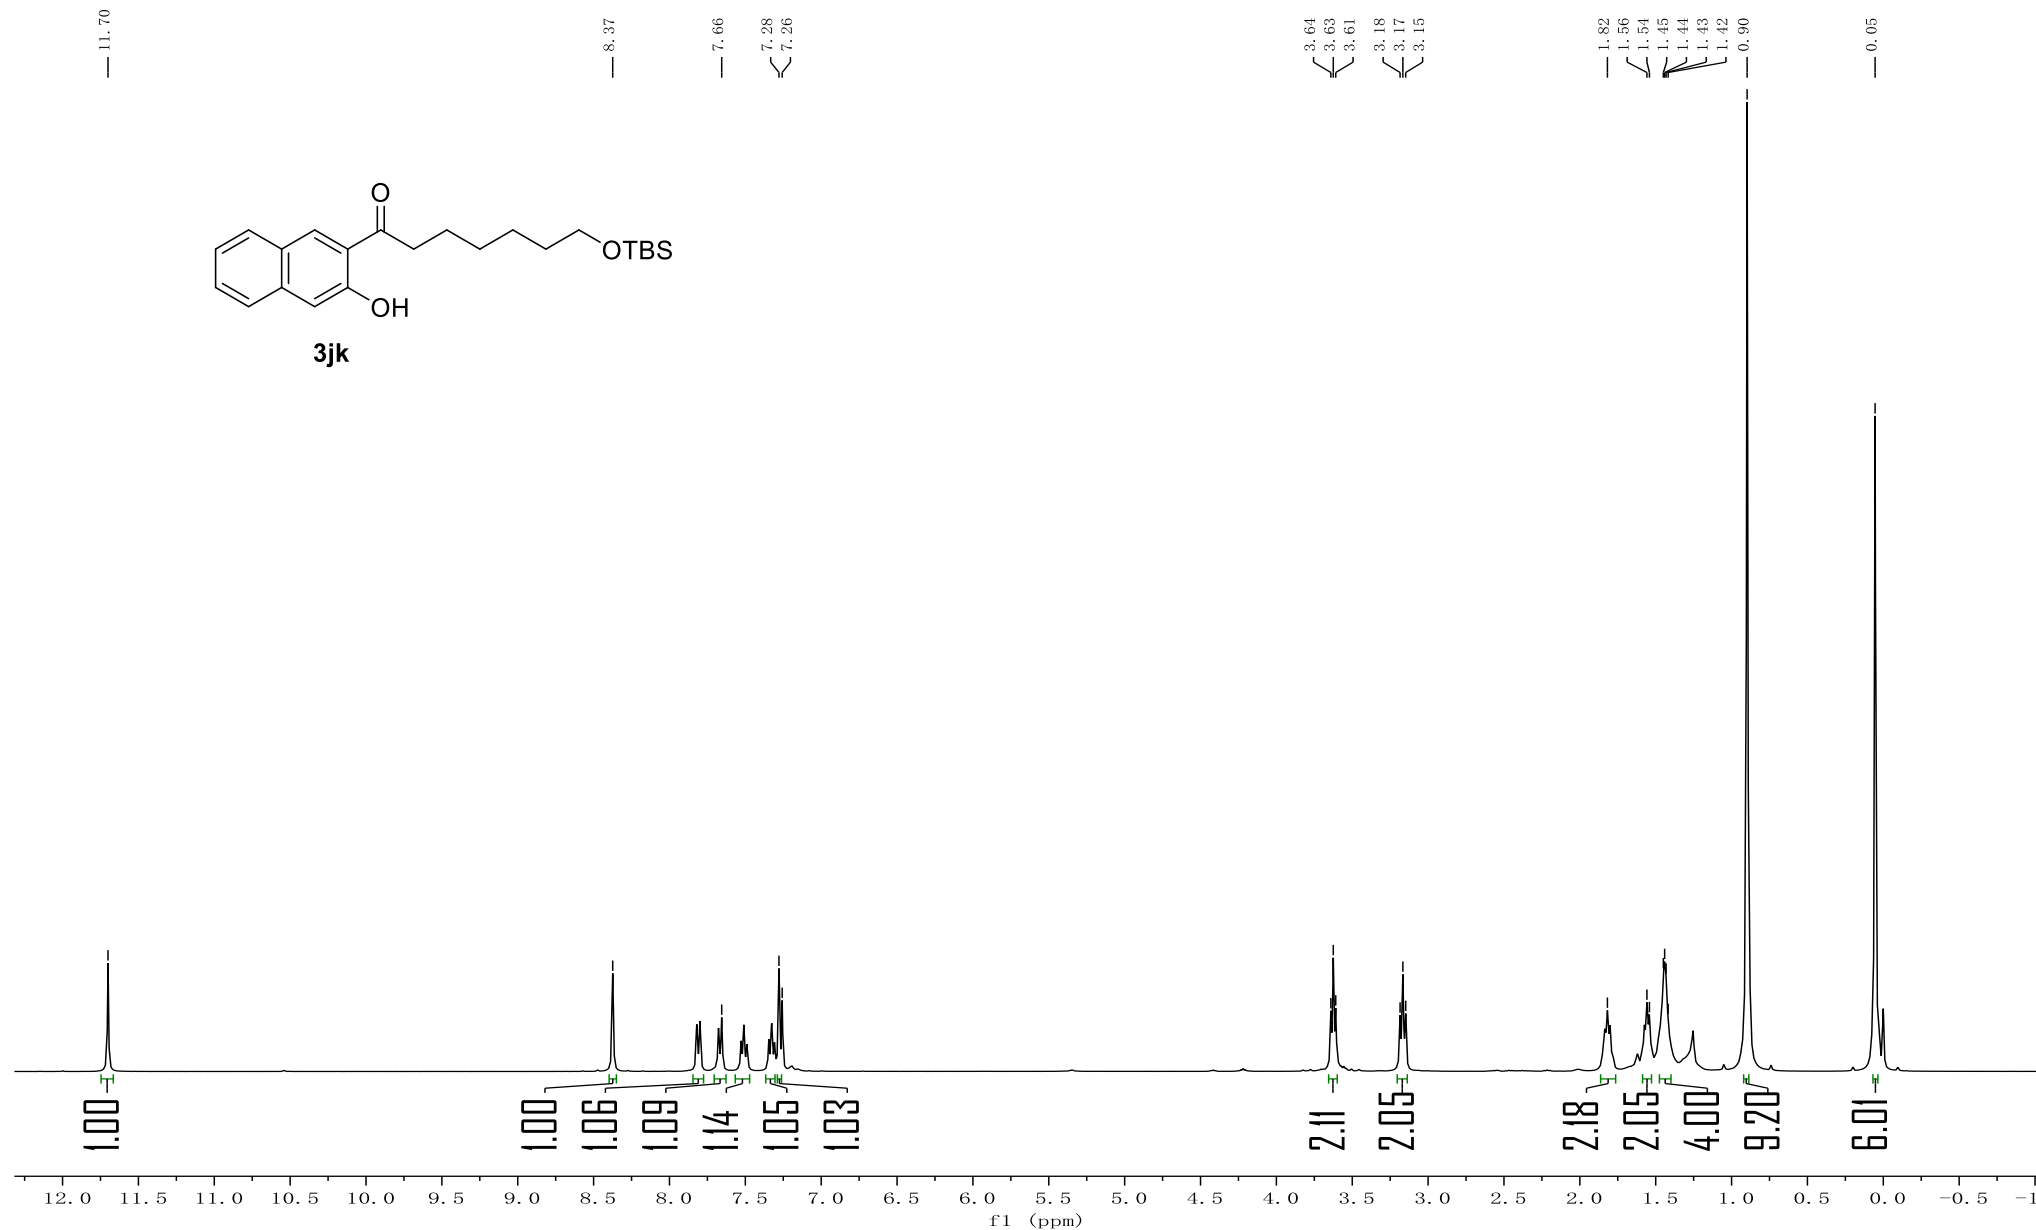

<sup>13</sup>CNMR-spectrum (101 MHz, CDCl<sub>3</sub>) of **3jk**

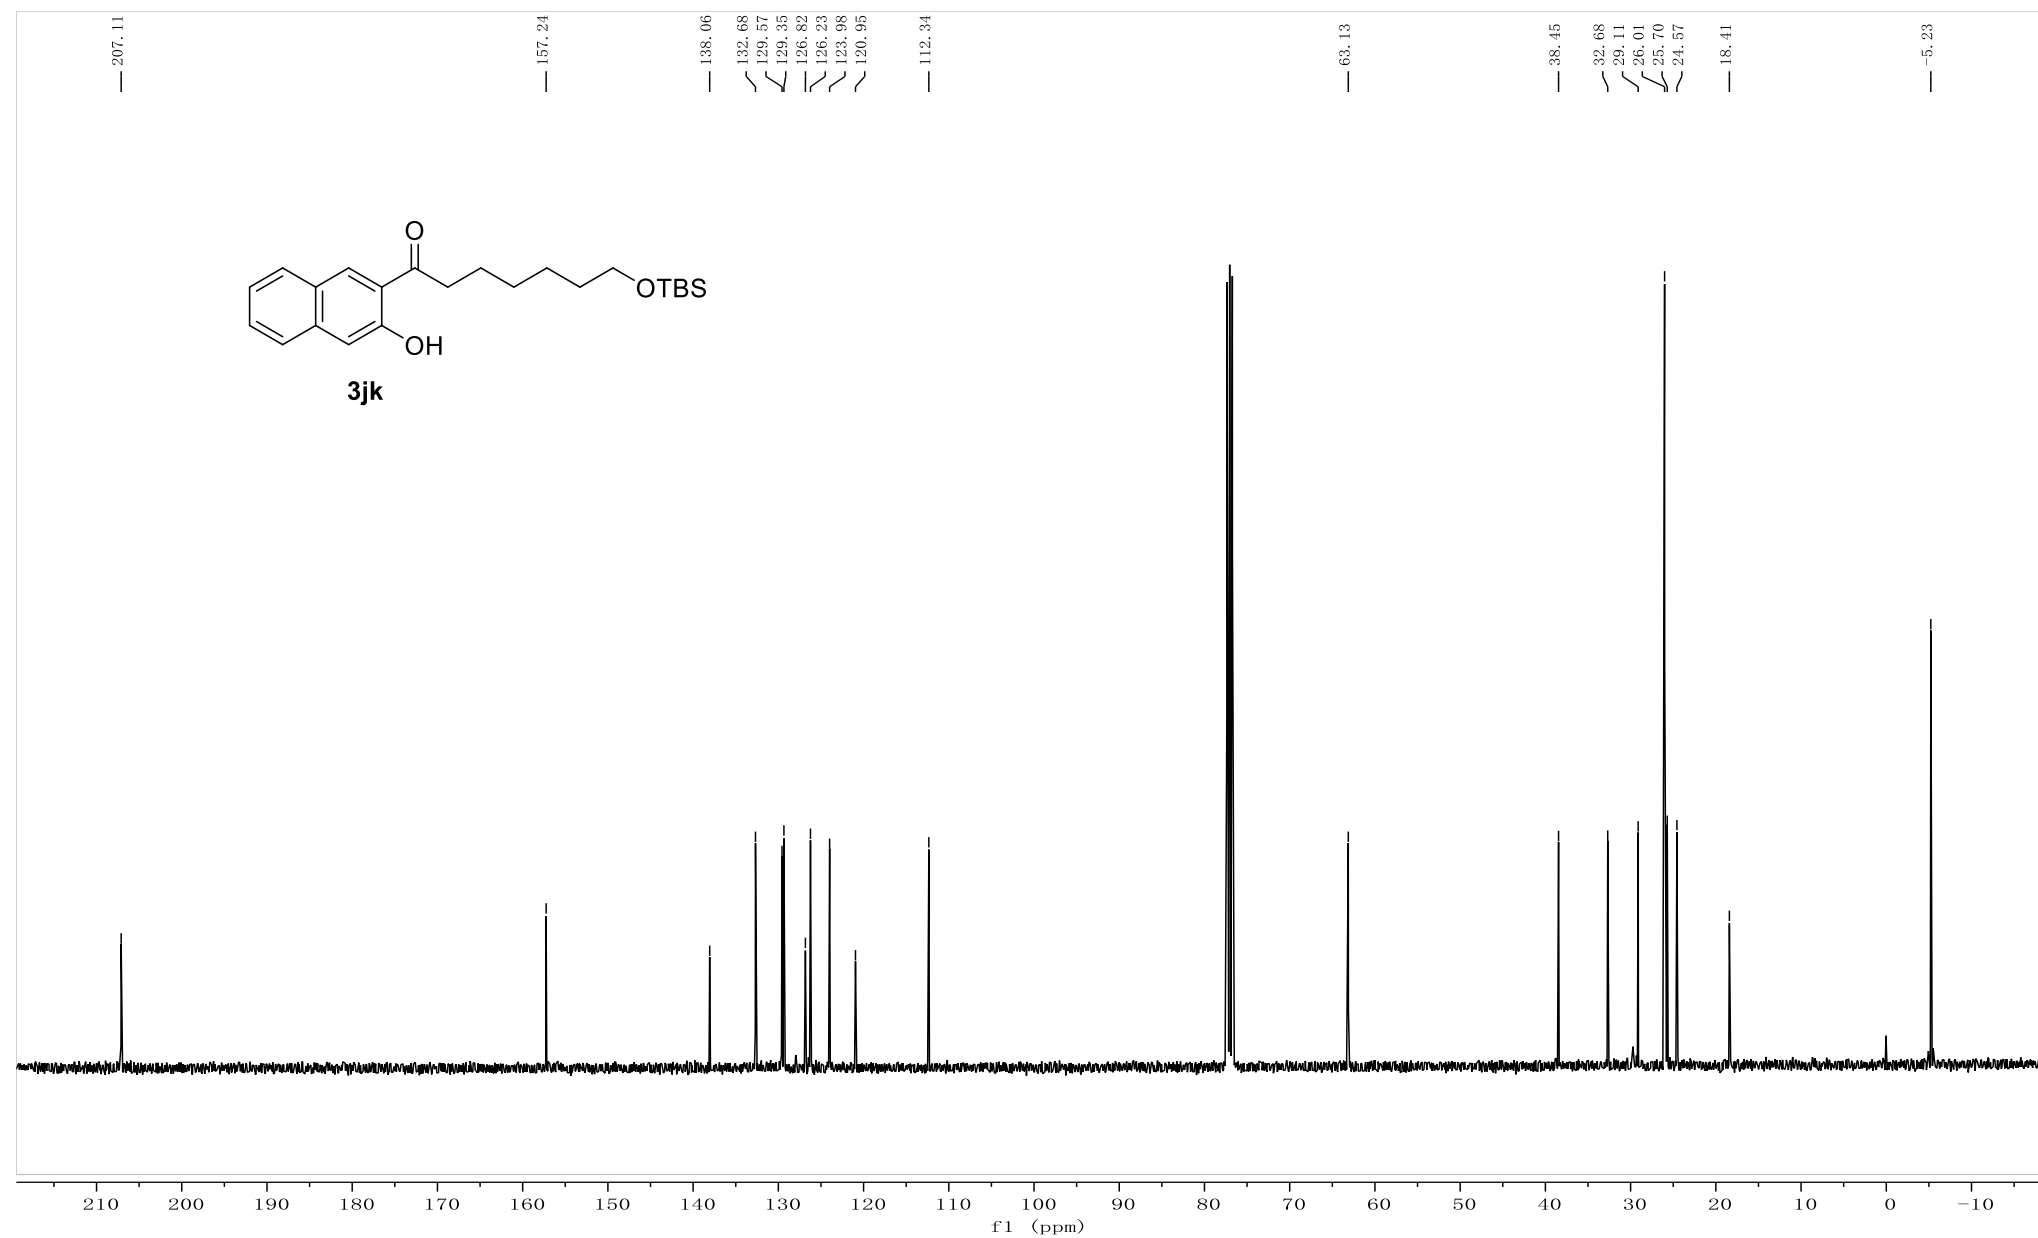

S139

<sup>1</sup>H NMR-spectrum (500 MHz, CDCl<sub>3</sub>) of **3kb**

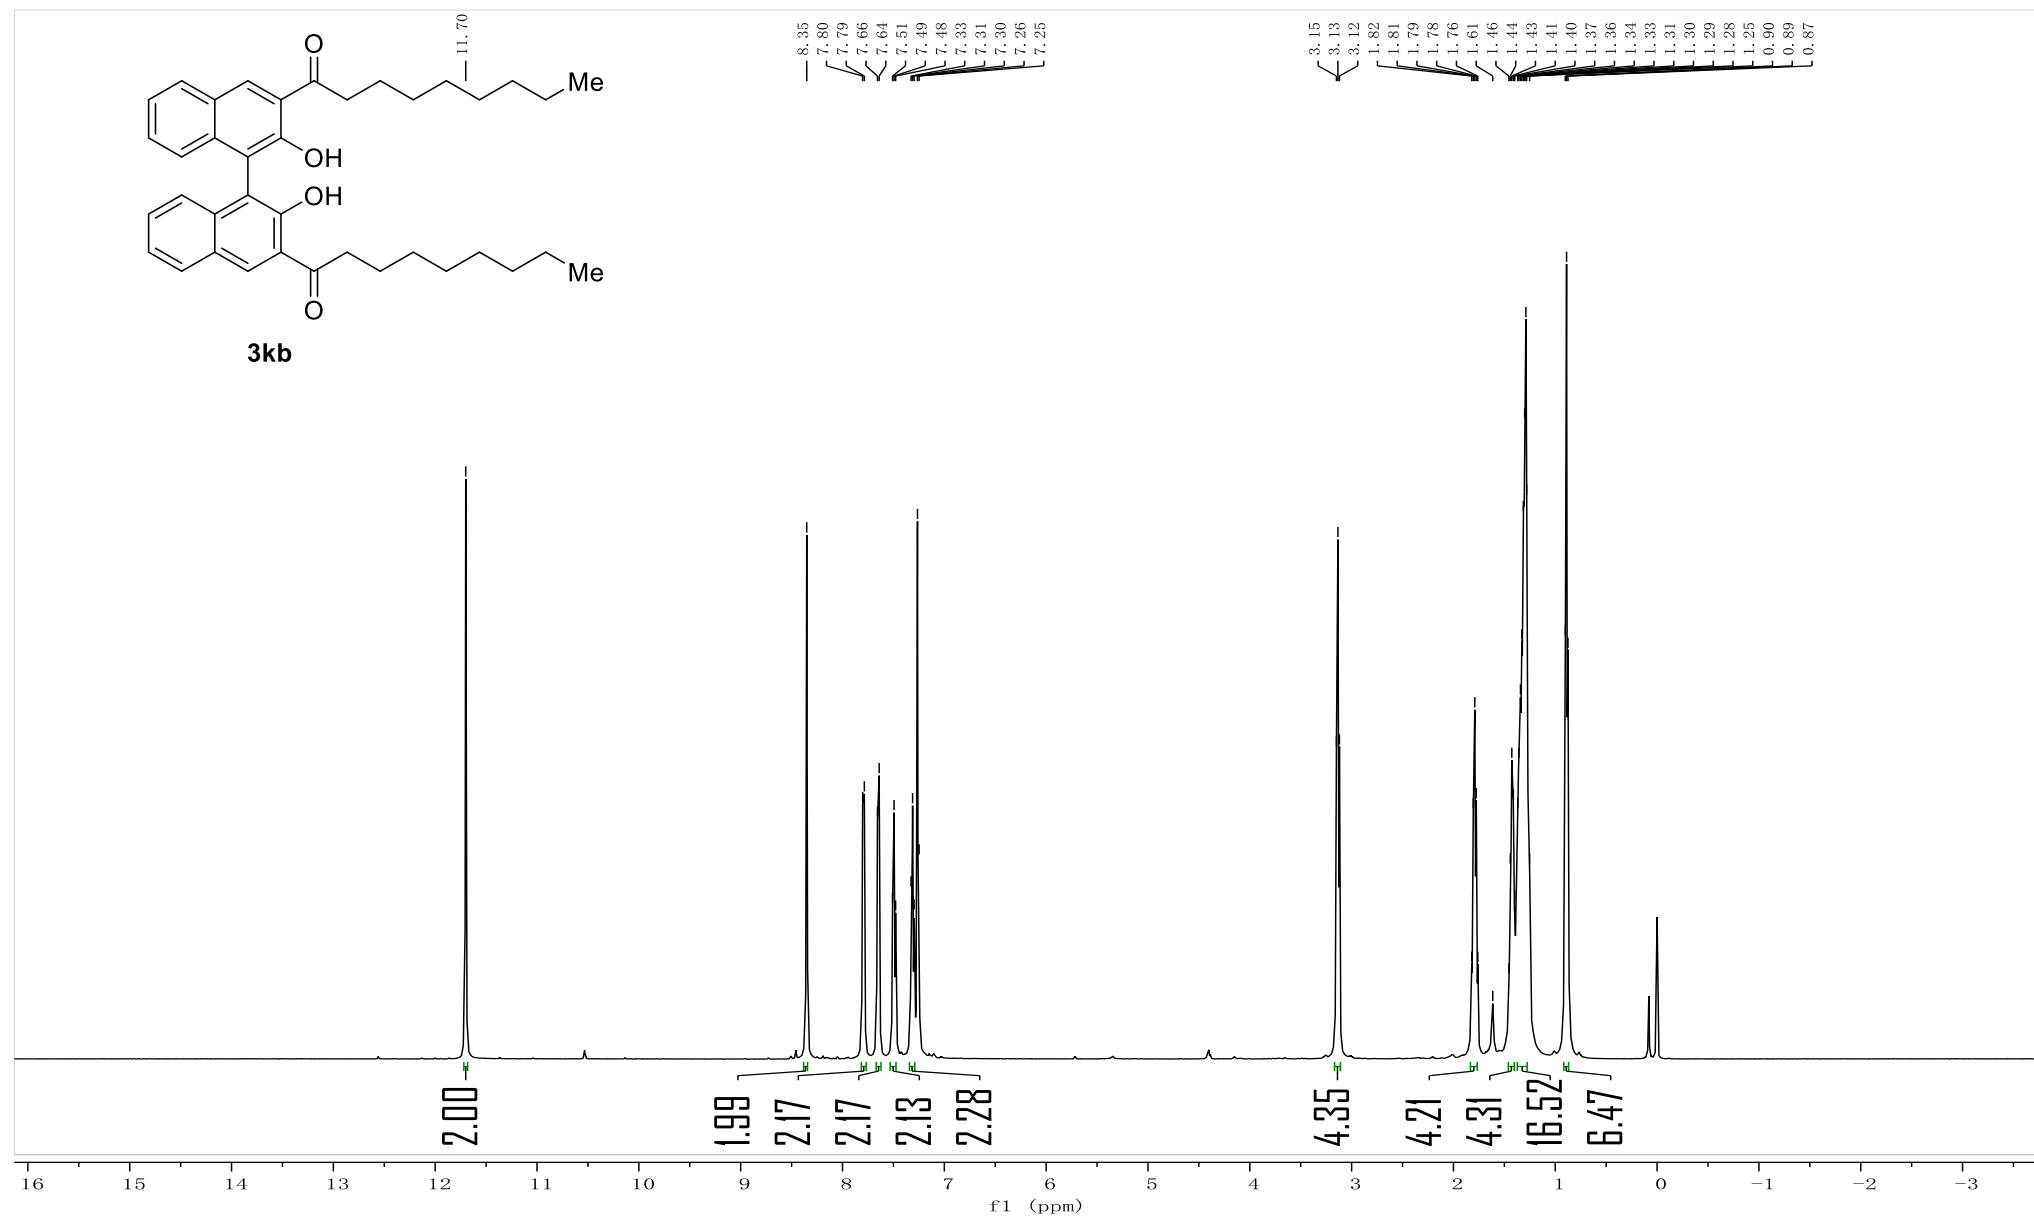



$^{13}\text{C}$ NMR-spectrum (126 MHz,  $\text{CDCl}_3$ ) of **3kb**

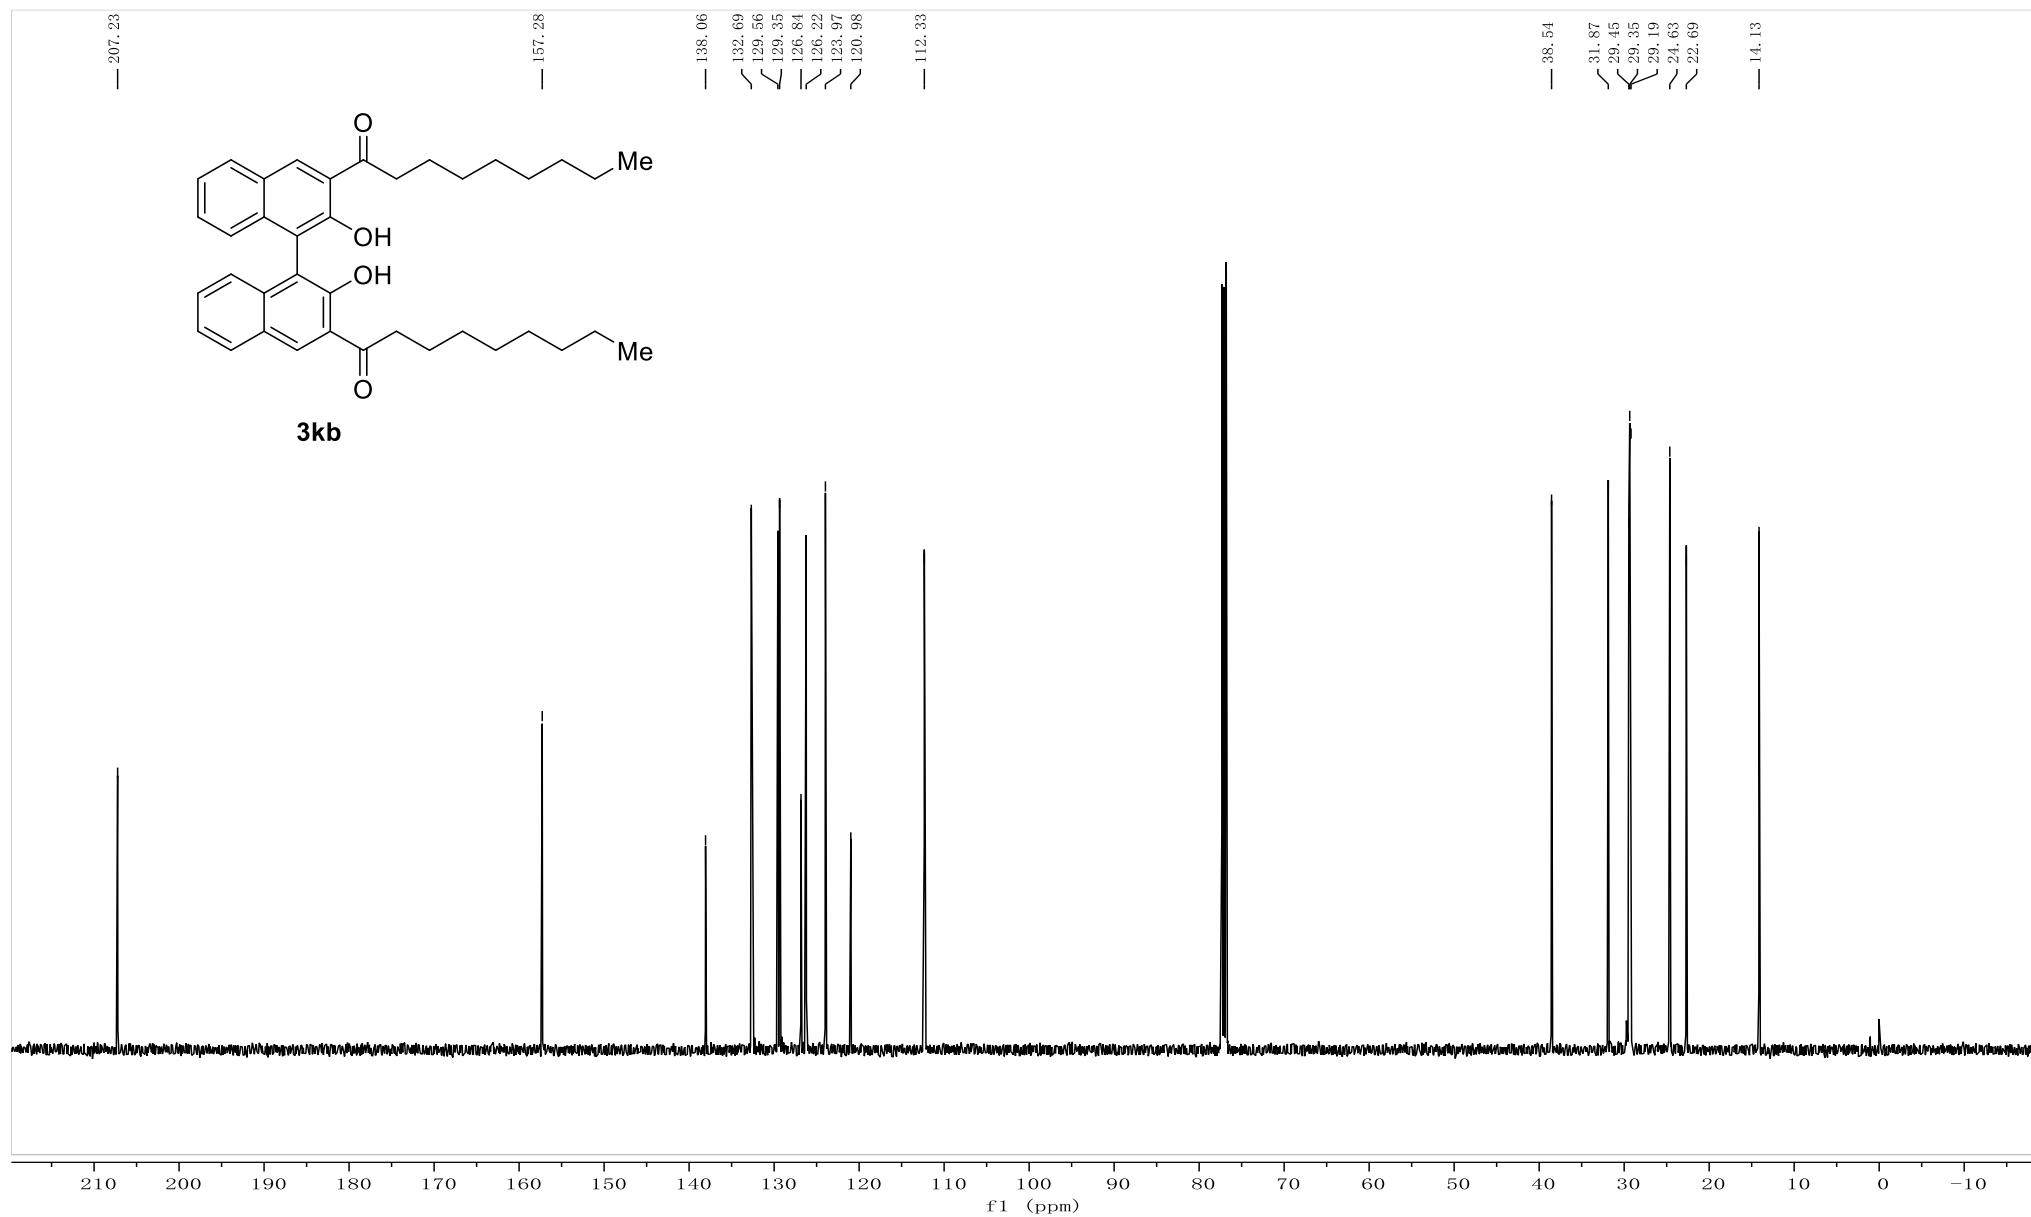

S141

<sup>1</sup>H NMR-spectrum (500 MHz, CDCl<sub>3</sub>) of **3ib**

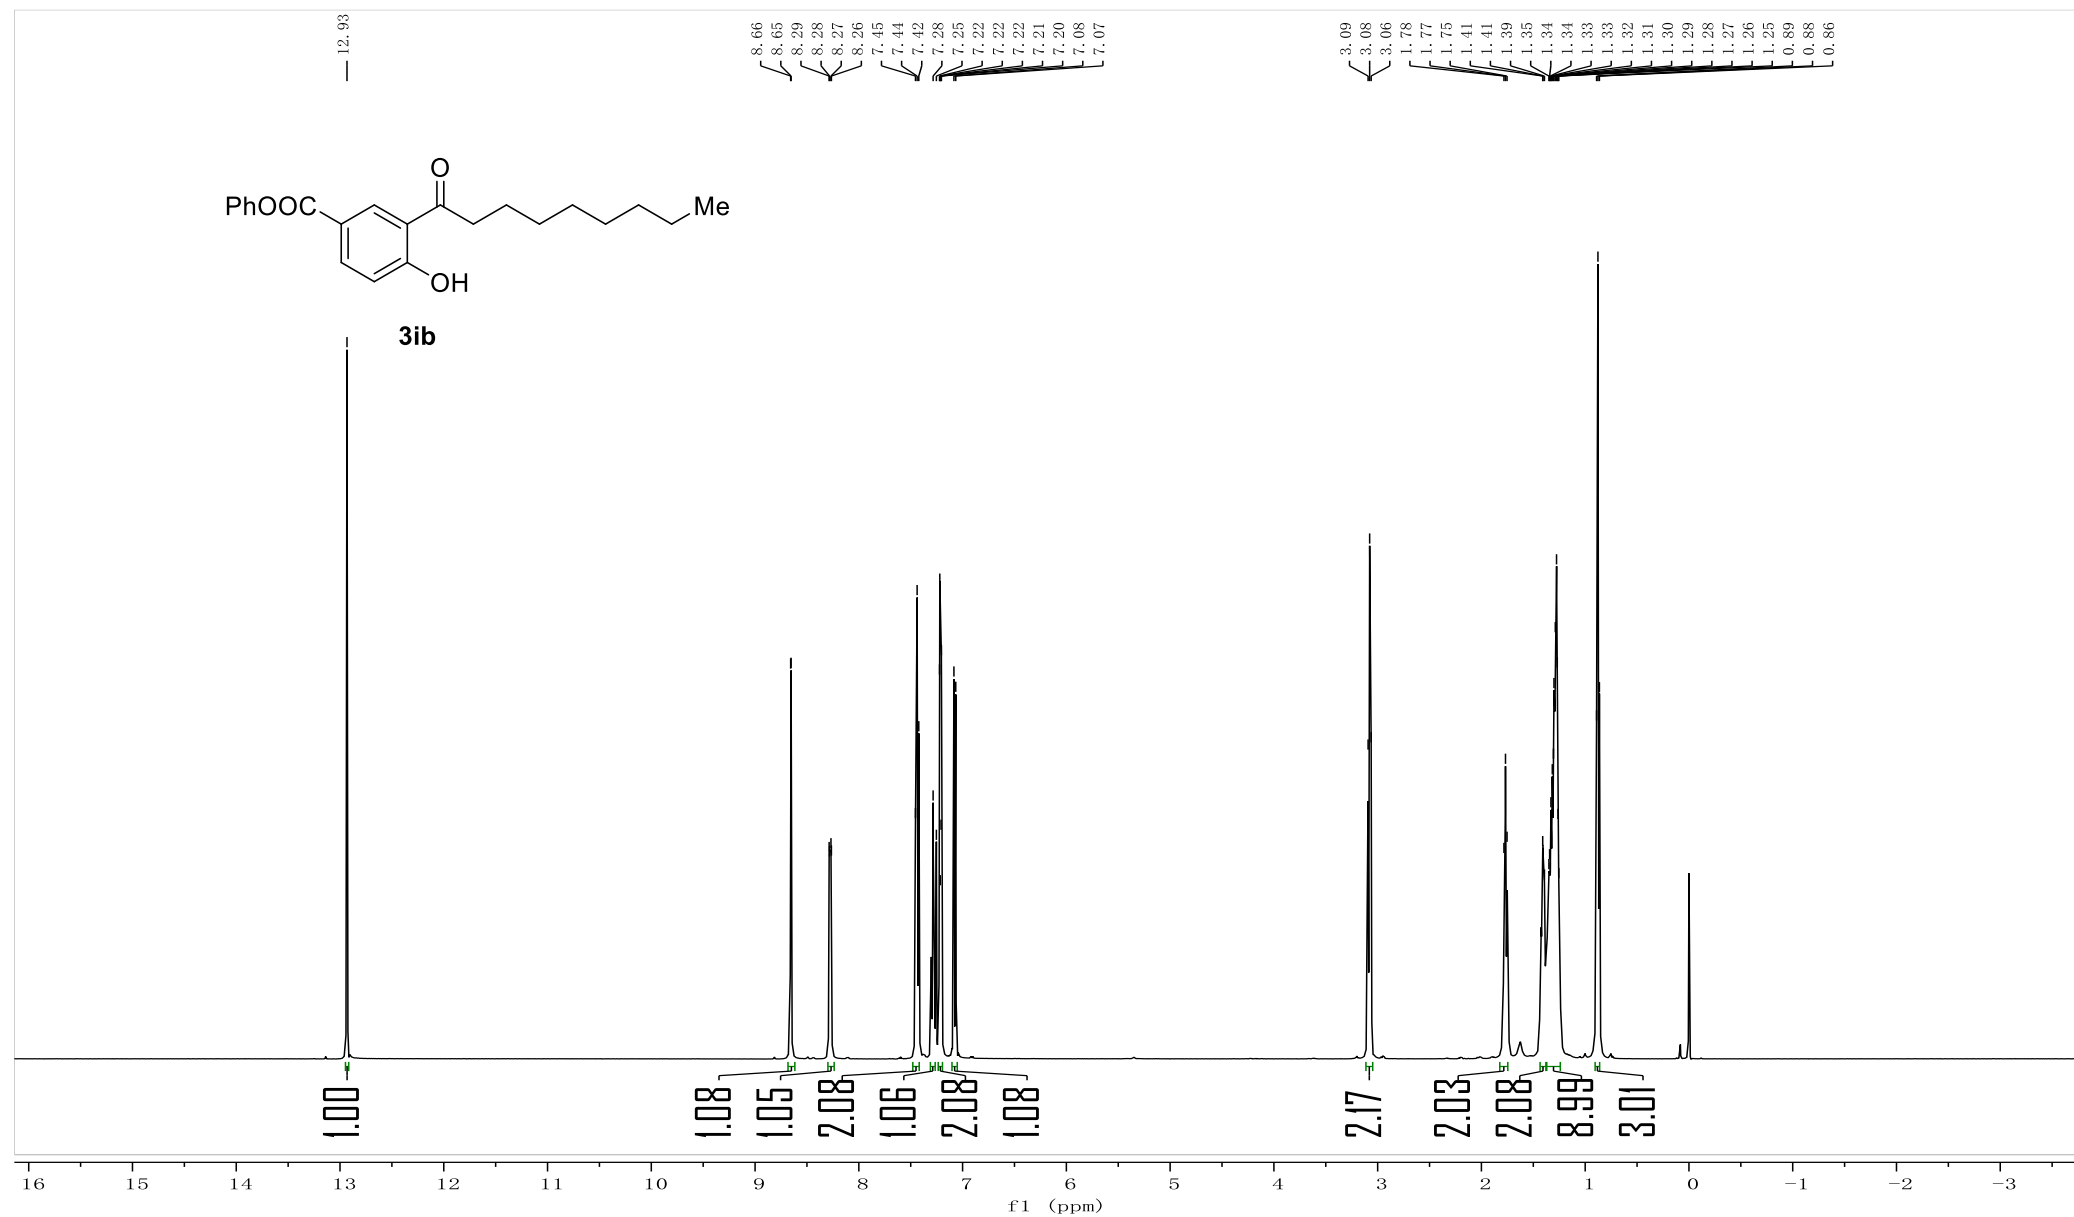

$^{13}\text{C}$ NMR-spectrum (126 MHz,  $\text{CDCl}_3$ ) of **3ib**

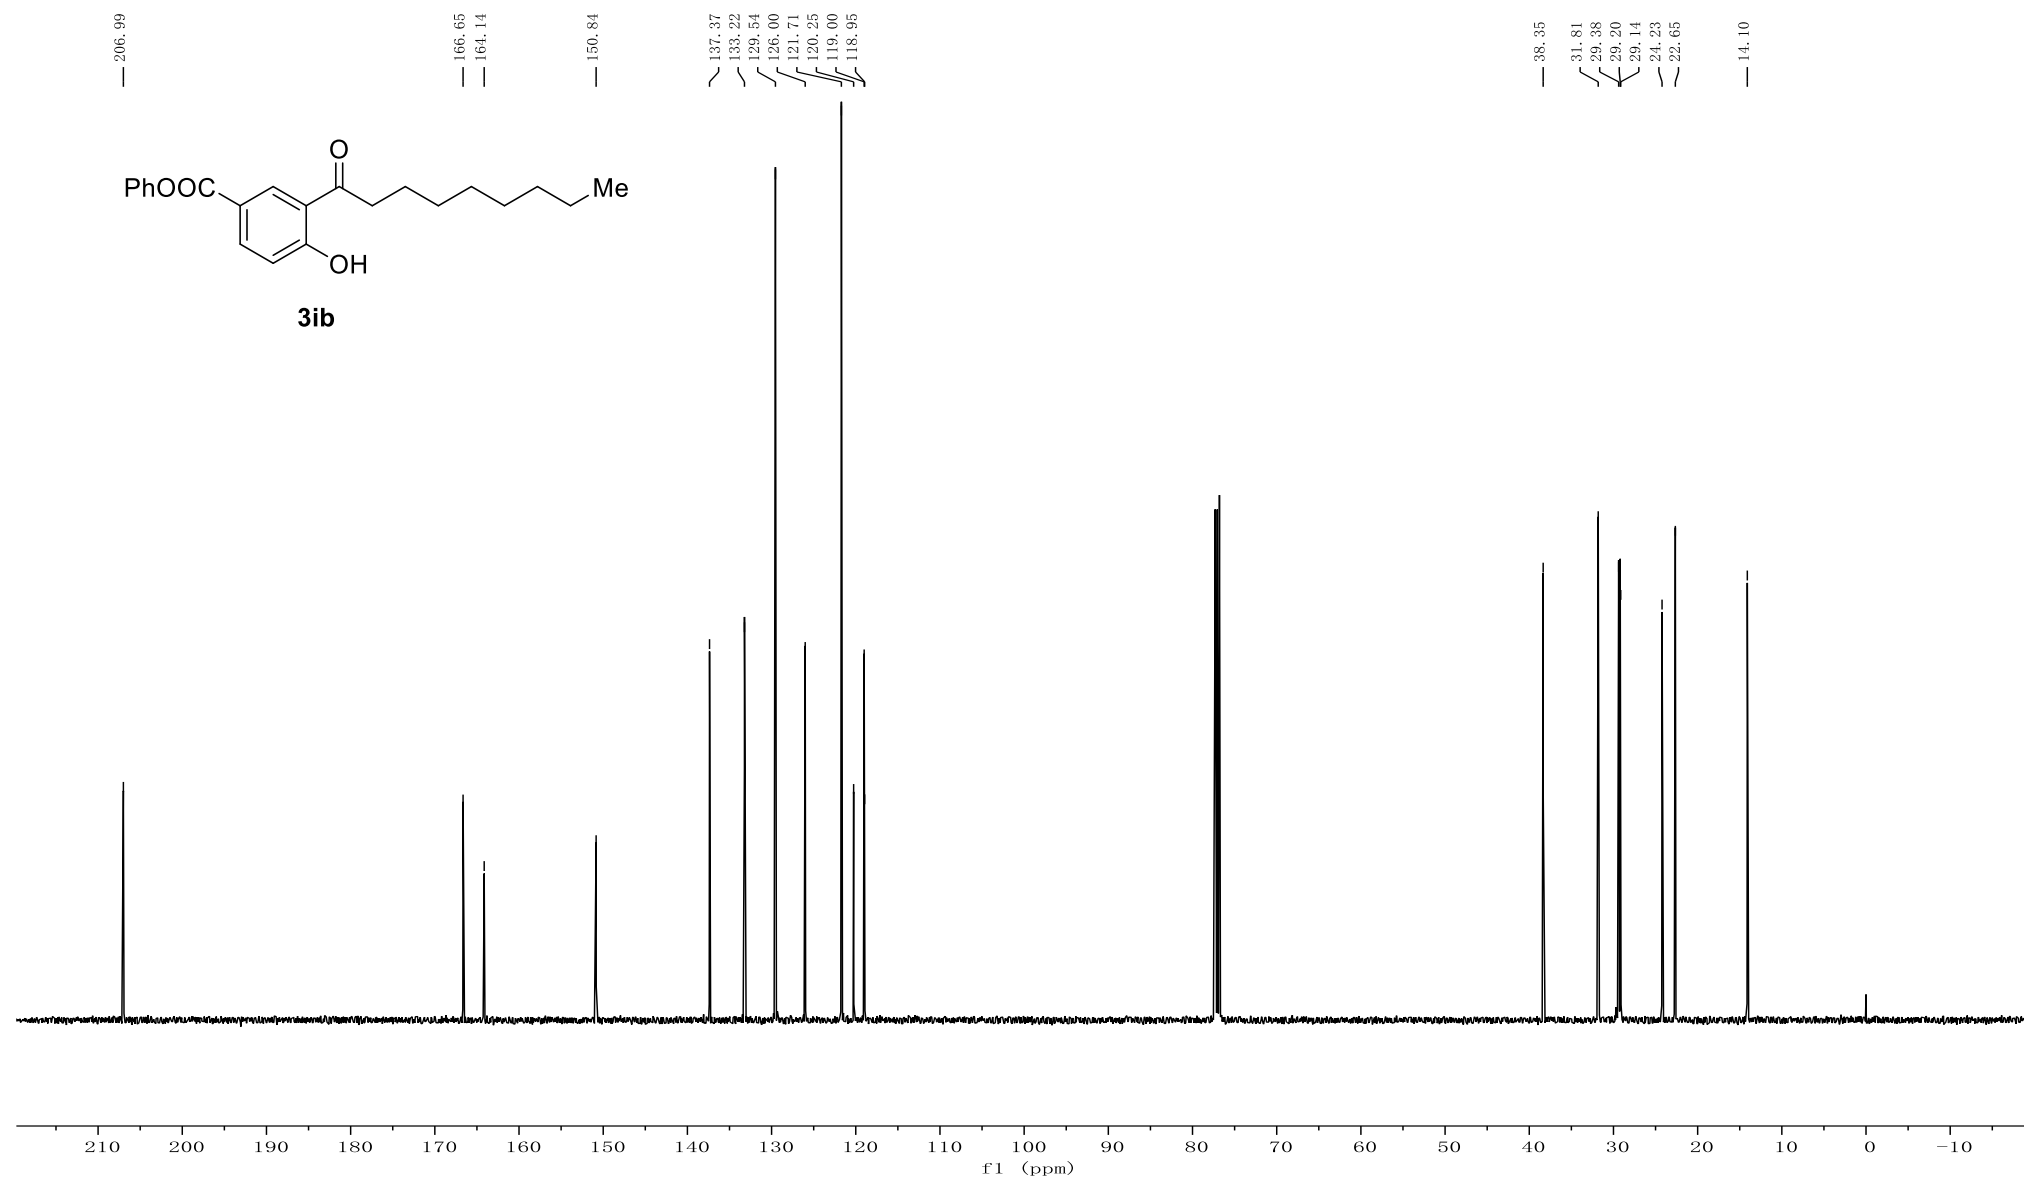

COSY-spectrum of **3ib**

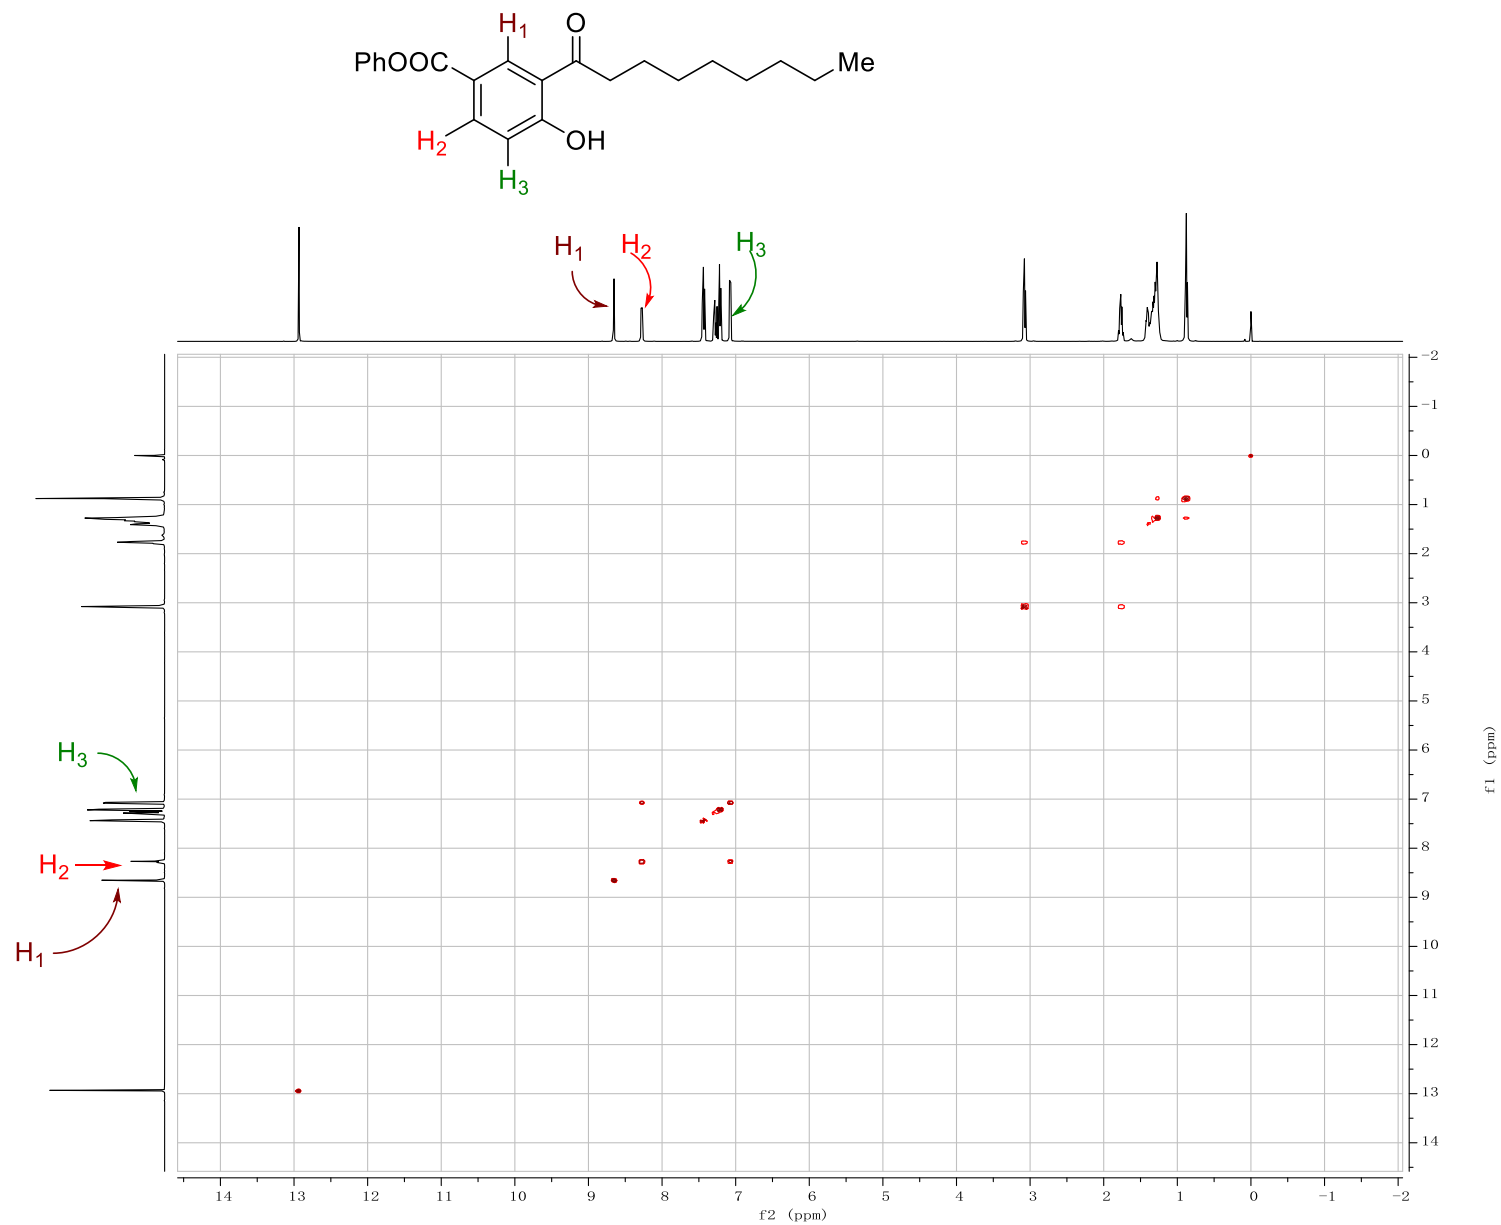

HSQC-spectrum of **3ib**

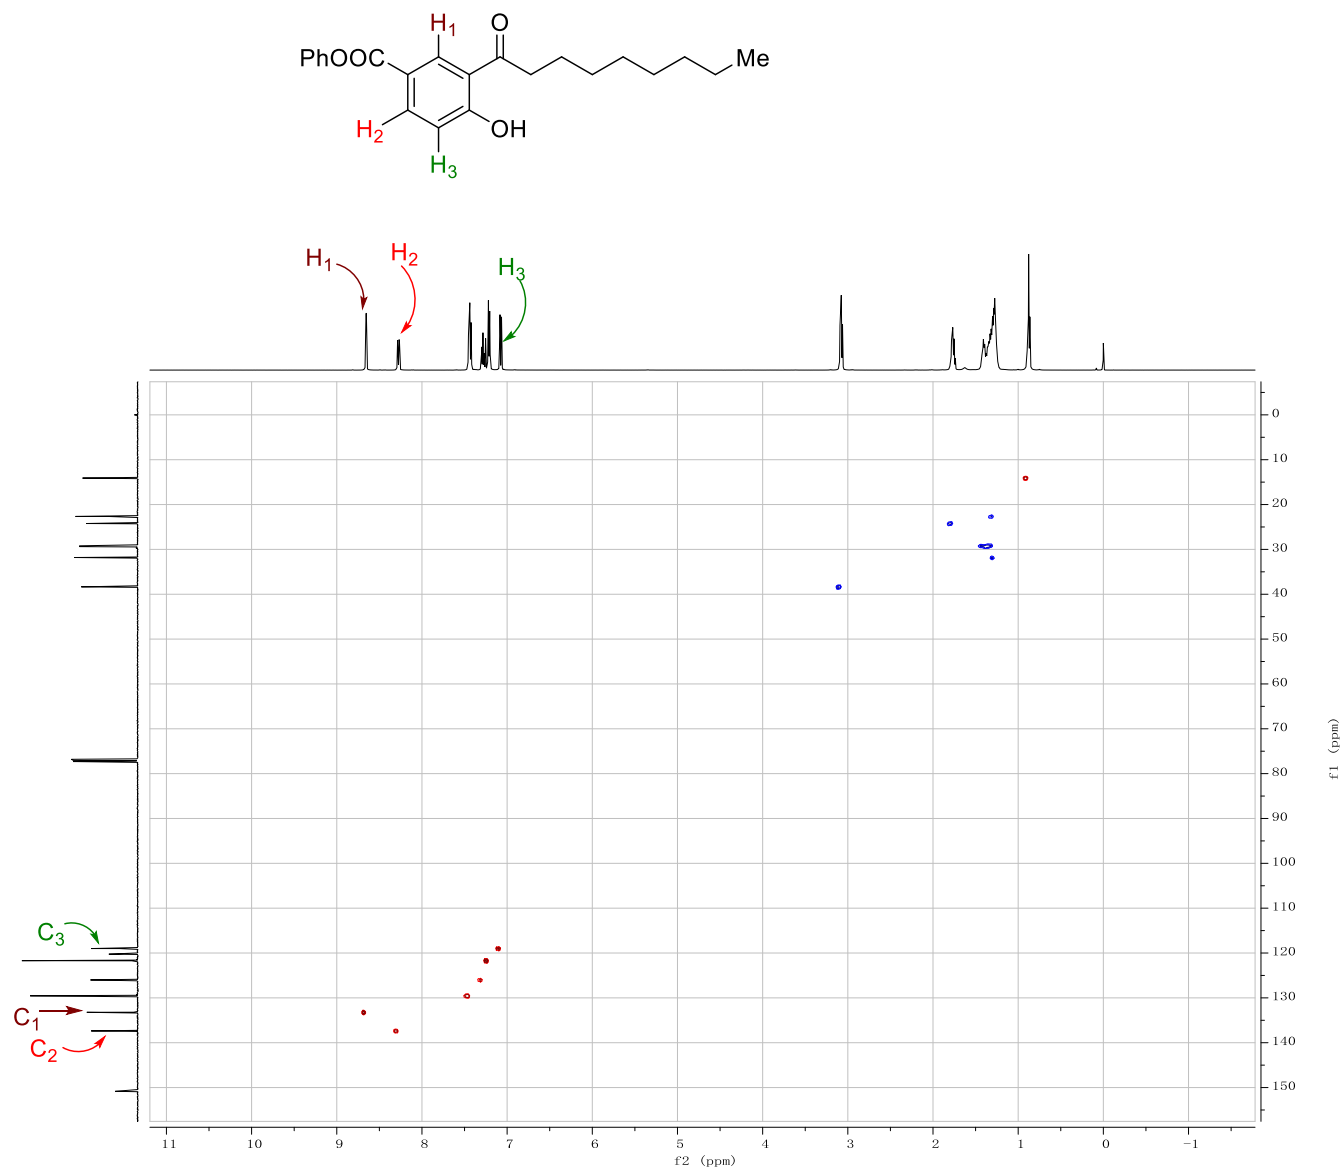

# HMBC-spectrum of **3ib**

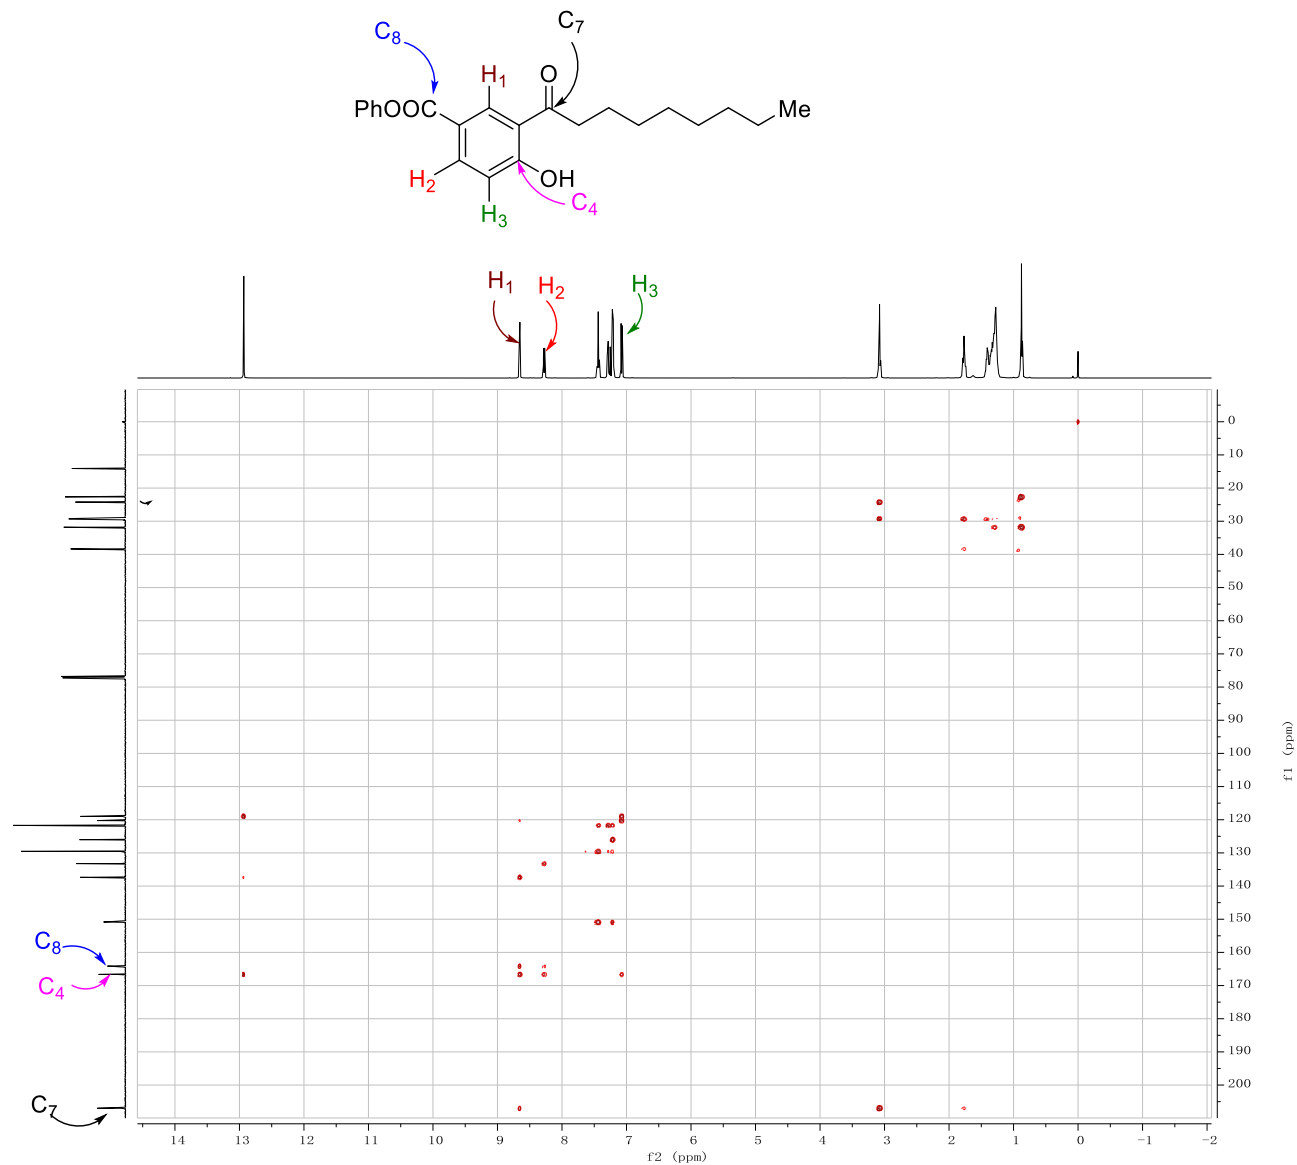

<sup>1</sup>H NMR-spectrum (400 MHz, CDCl<sub>3</sub>) of **5ab**

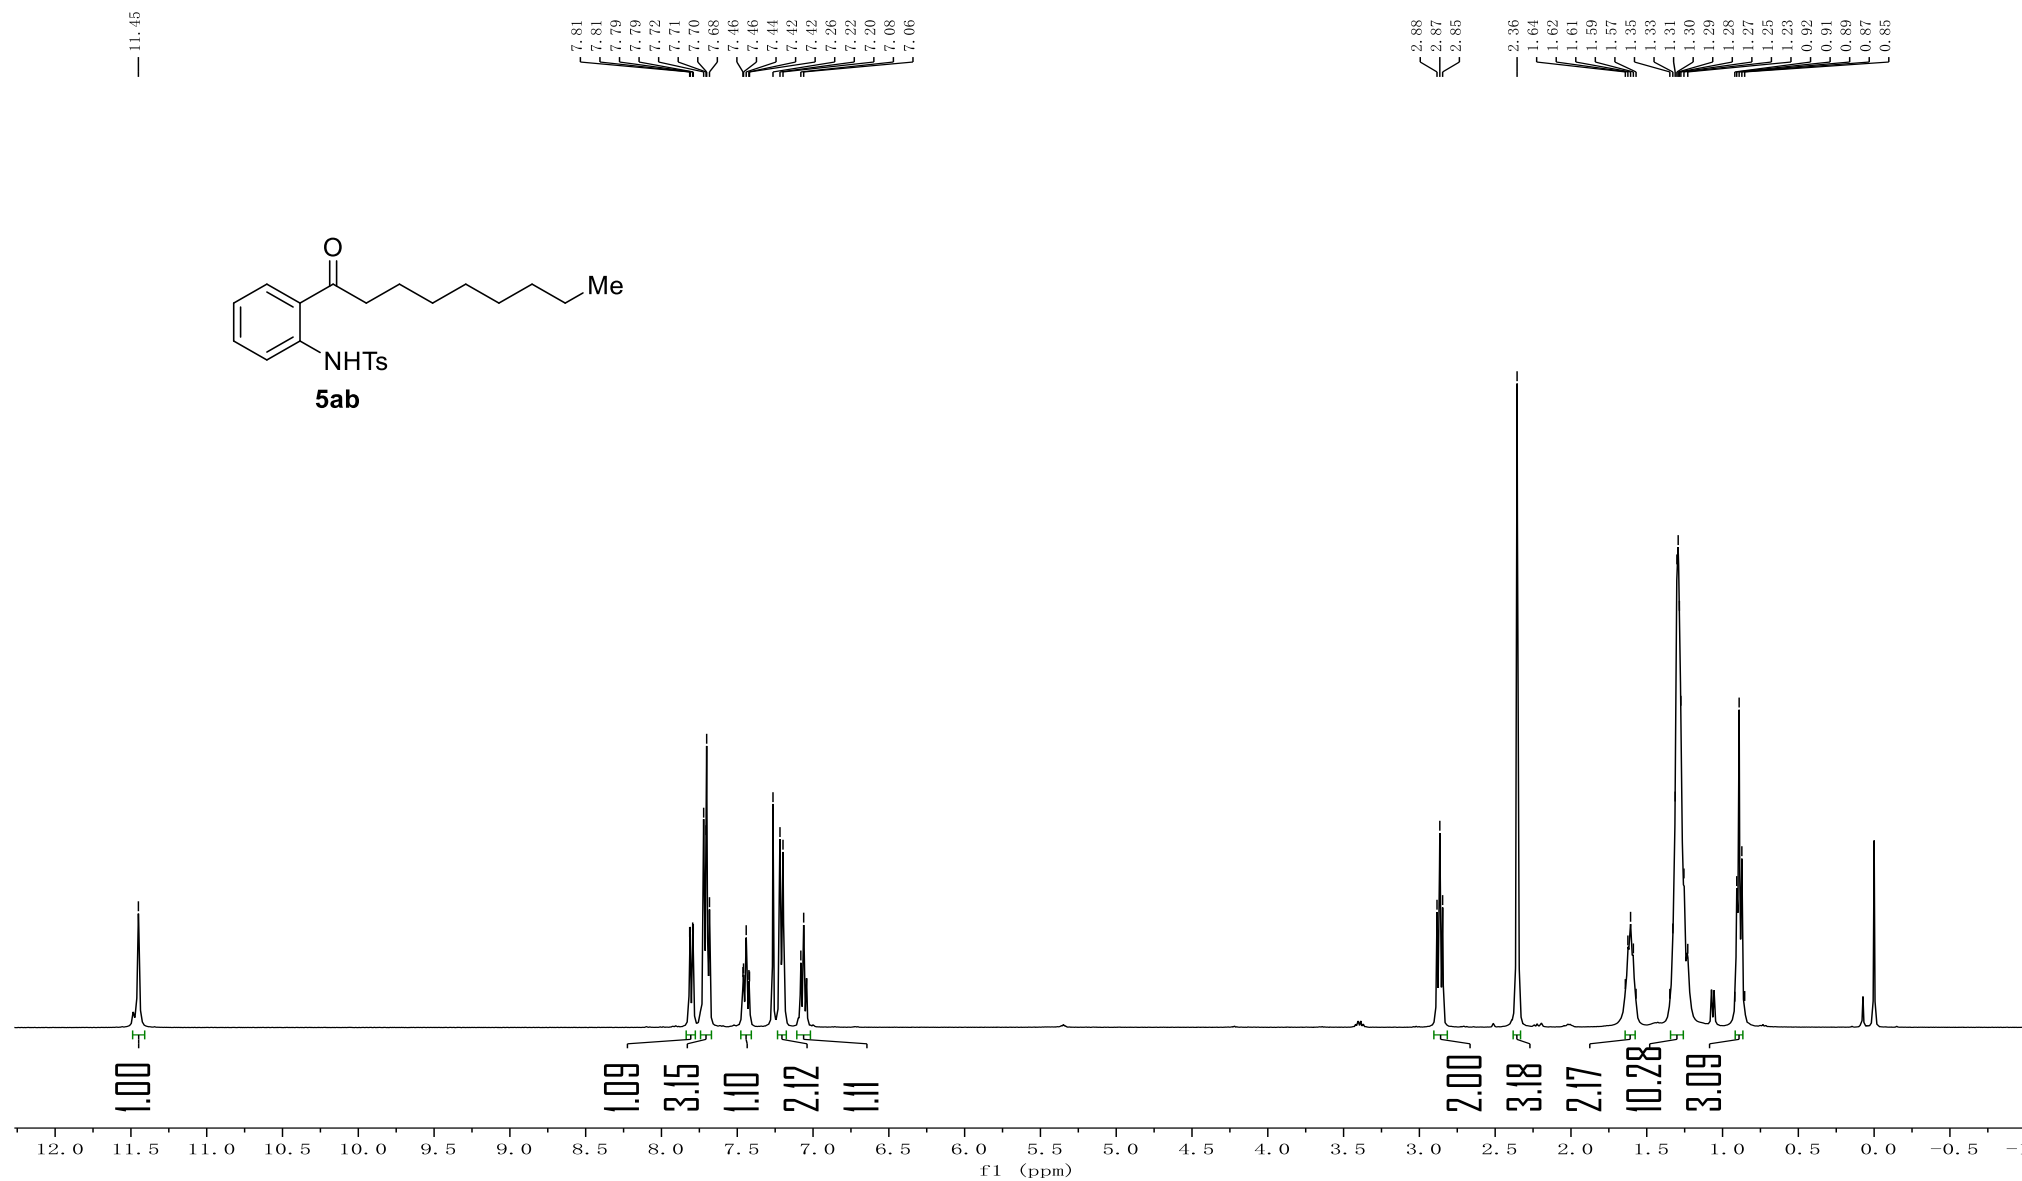

$^{13}\text{C}$ NMR-spectrum (101 MHz,  $\text{CDCl}_3$ ) of **5ab**

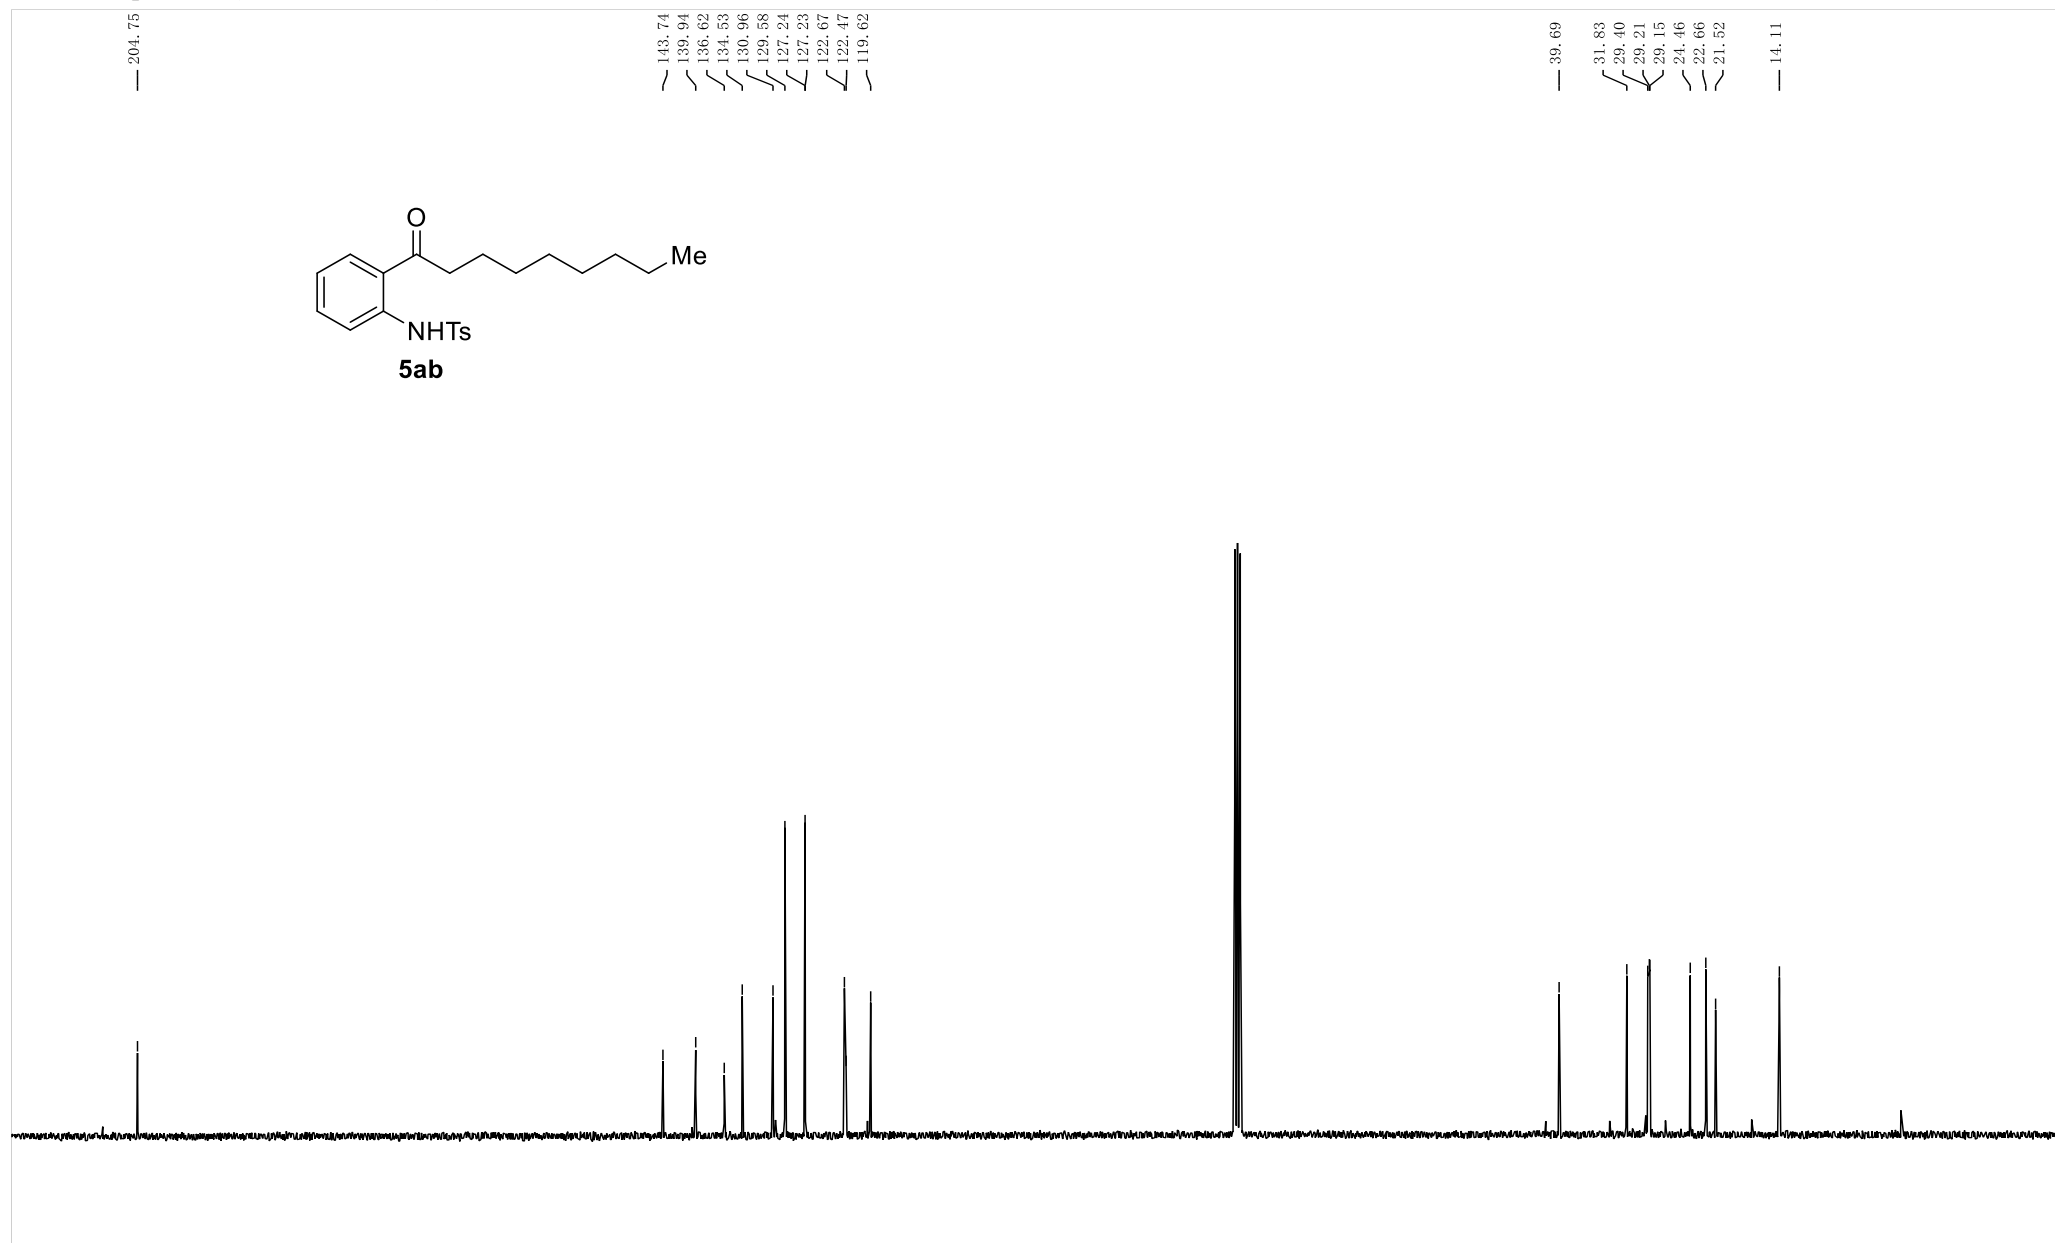



<sup>1</sup>H NMR-spectrum (400 MHz, CDCl<sub>3</sub>) of **5ac**

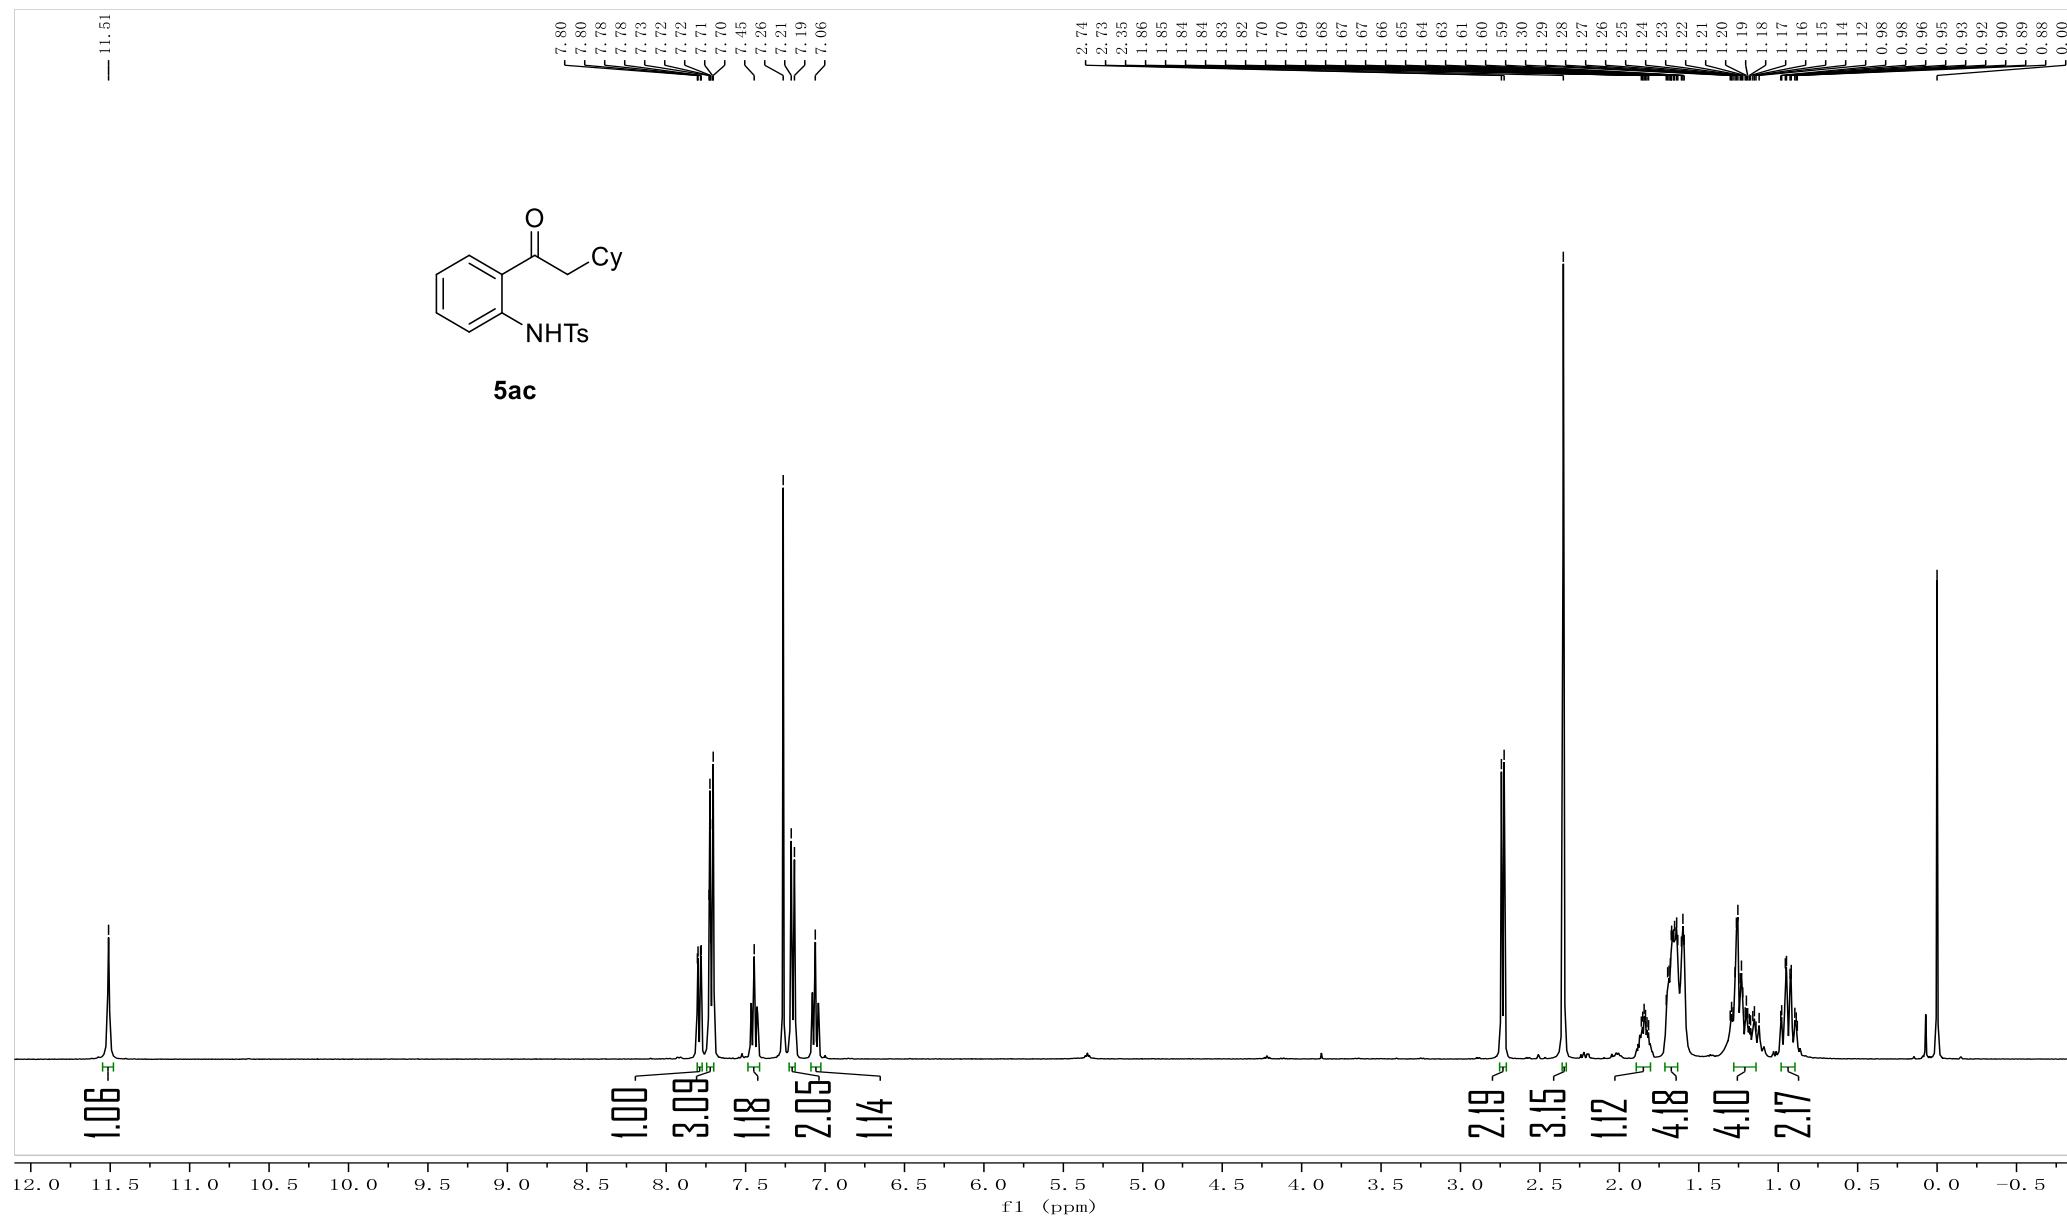

$^{13}\text{C}$ NMR-spectrum (101 MHz,  $\text{CDCl}_3$ ) of **5ac**

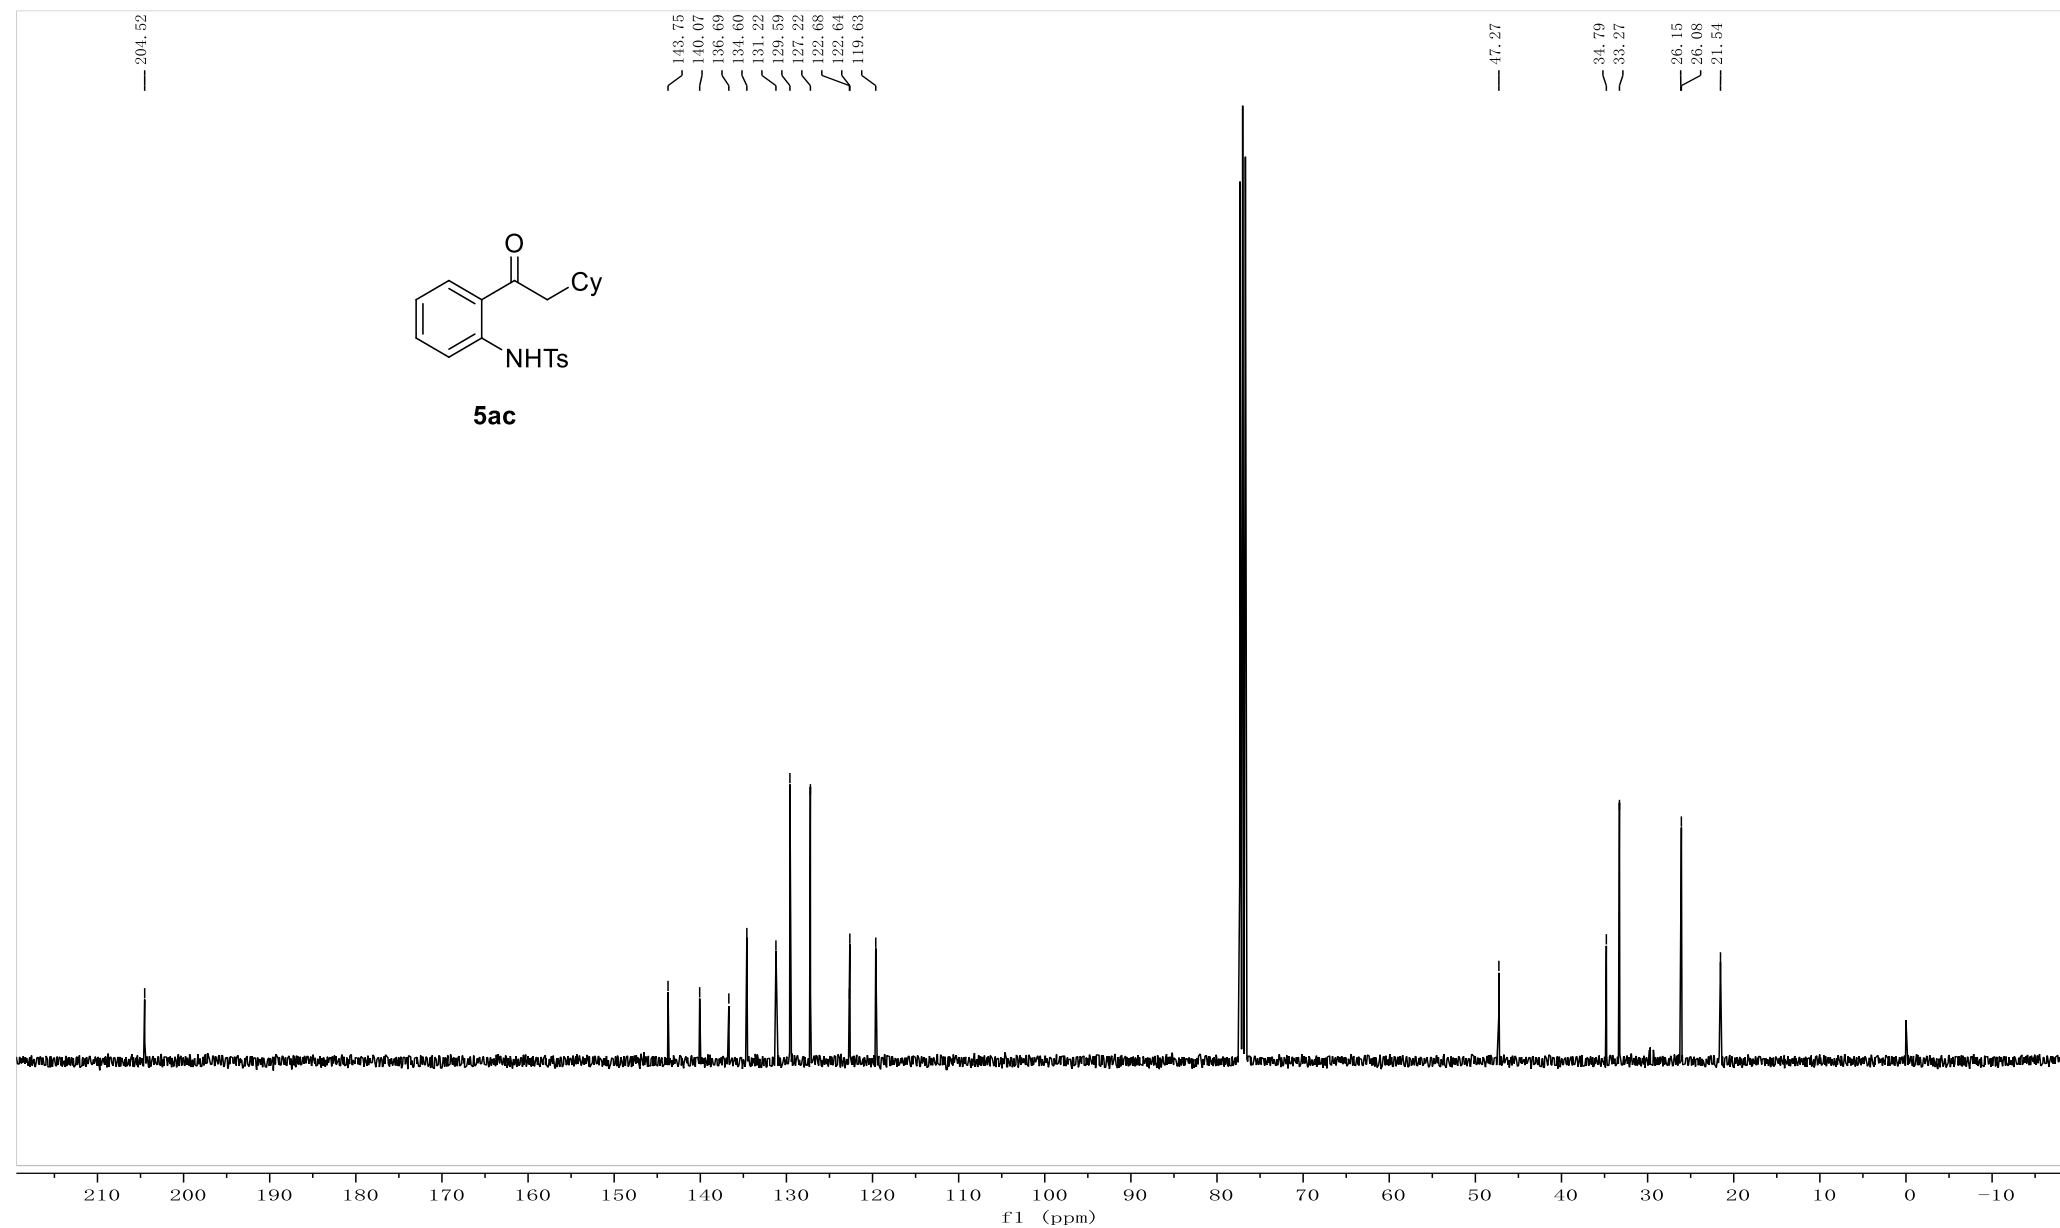

S150

<sup>1</sup>H NMR-spectrum (500 MHz, CDCl<sub>3</sub>) of **5ai**

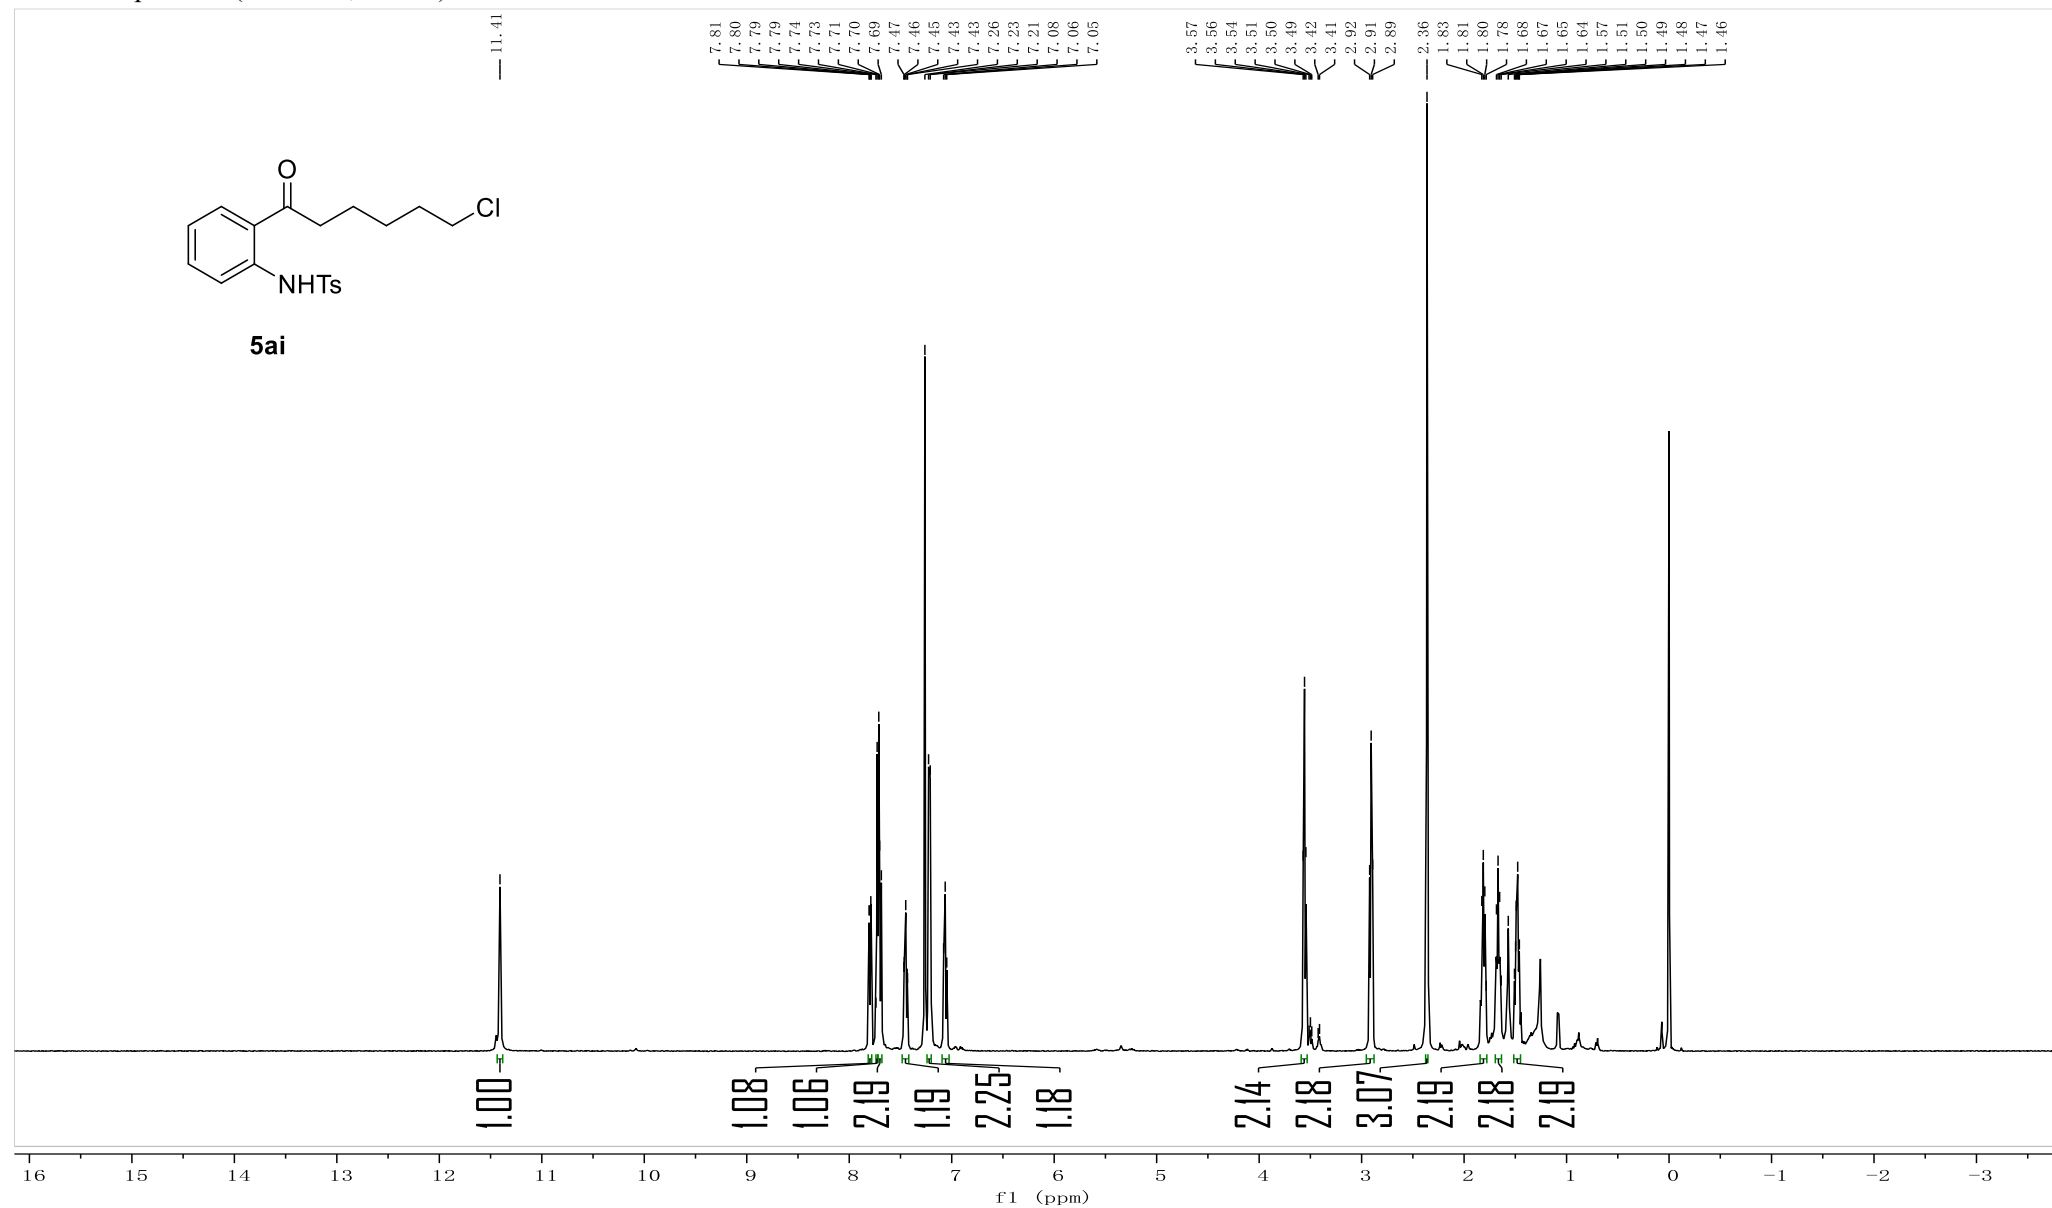

<sup>13</sup>CNMR-spectrum (126 MHz, CDCl<sub>3</sub>) of **5ai**

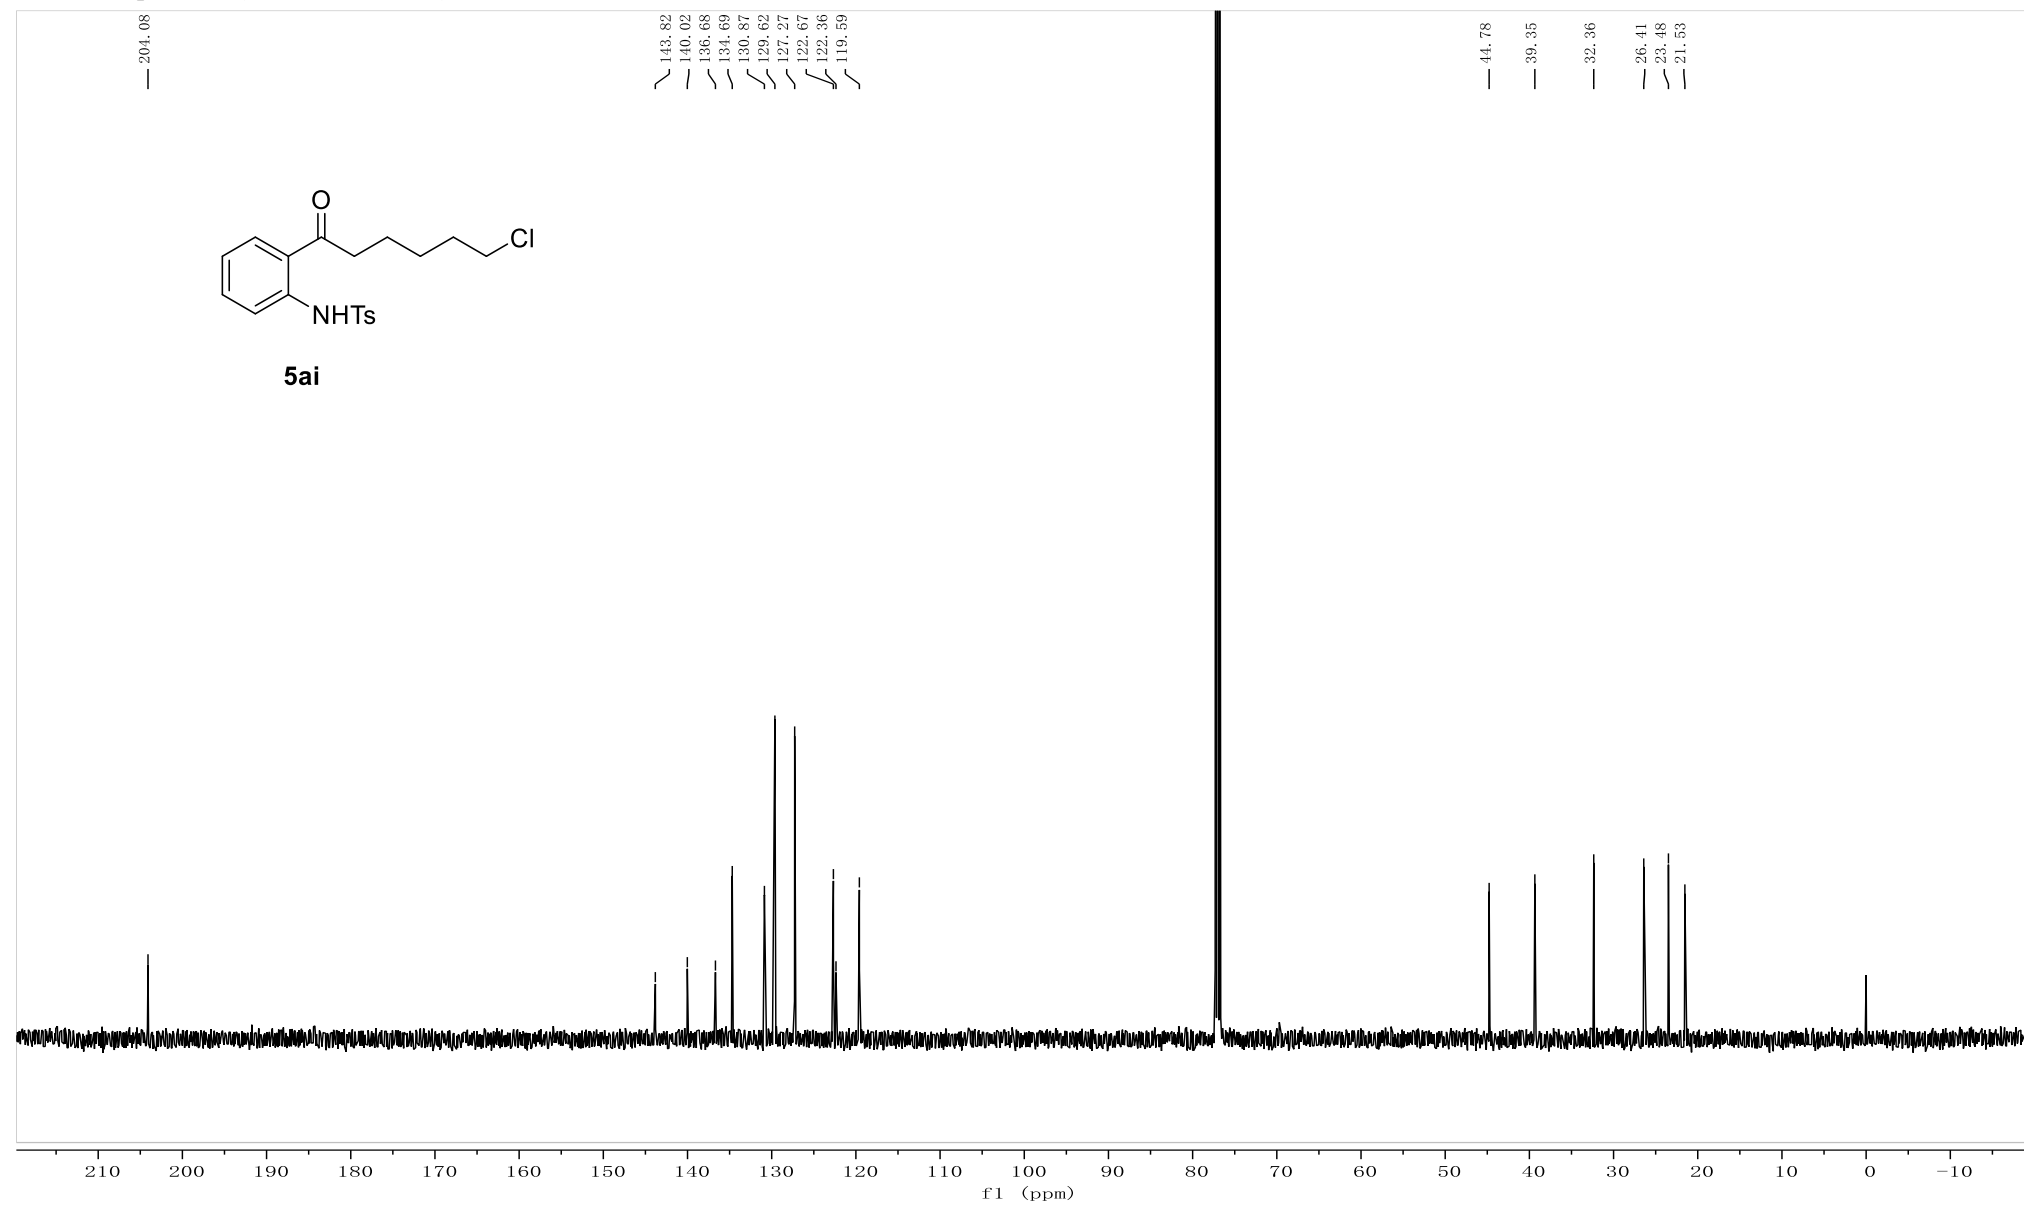

<sup>1</sup>H NMR-spectrum (400 MHz, CDCl<sub>3</sub>) of **5ak**

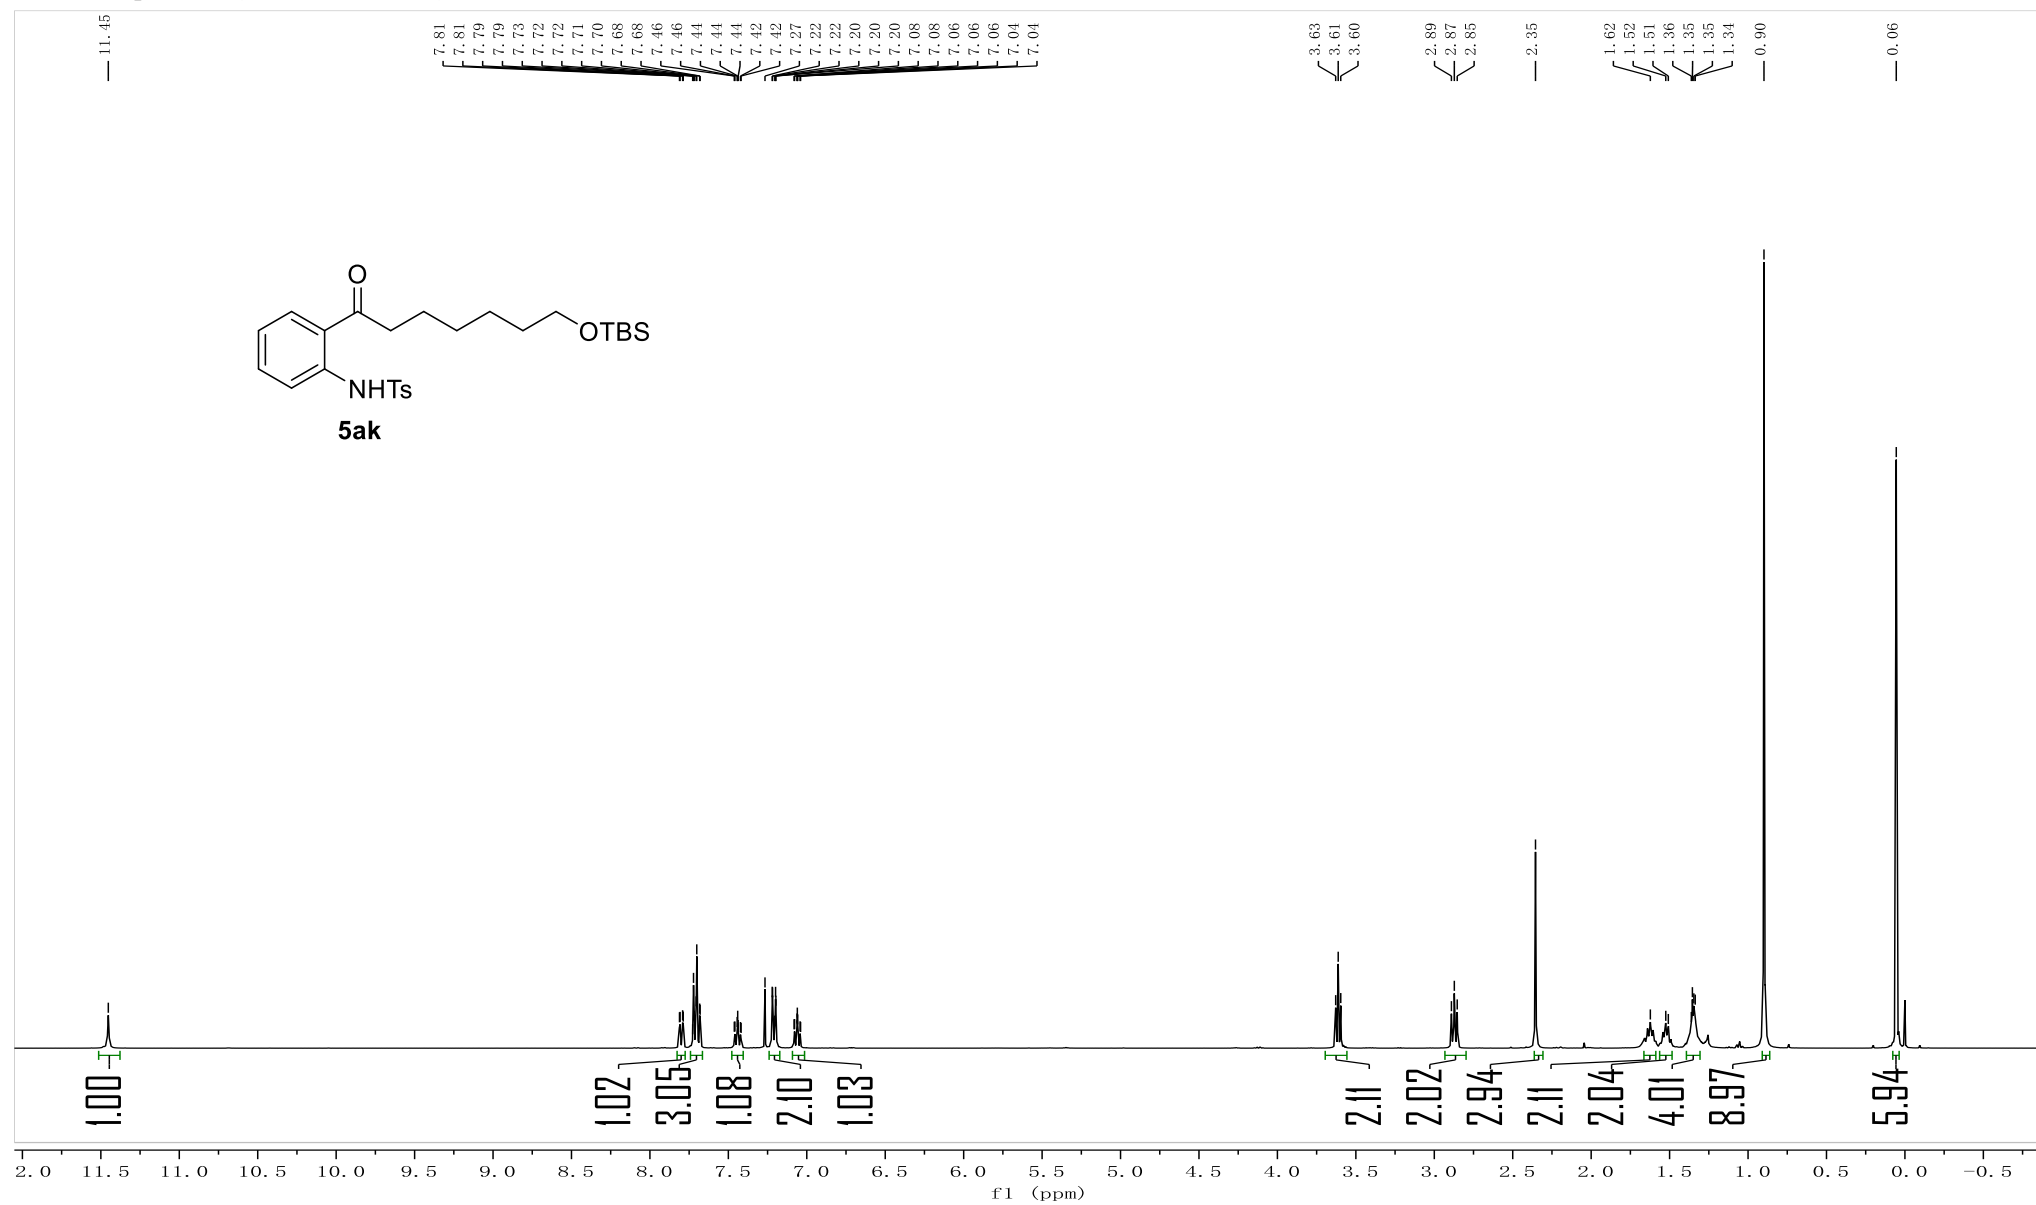

$^{13}\text{C}$ NMR-spectrum (101 MHz,  $\text{CDCl}_3$ ) of **5ak**

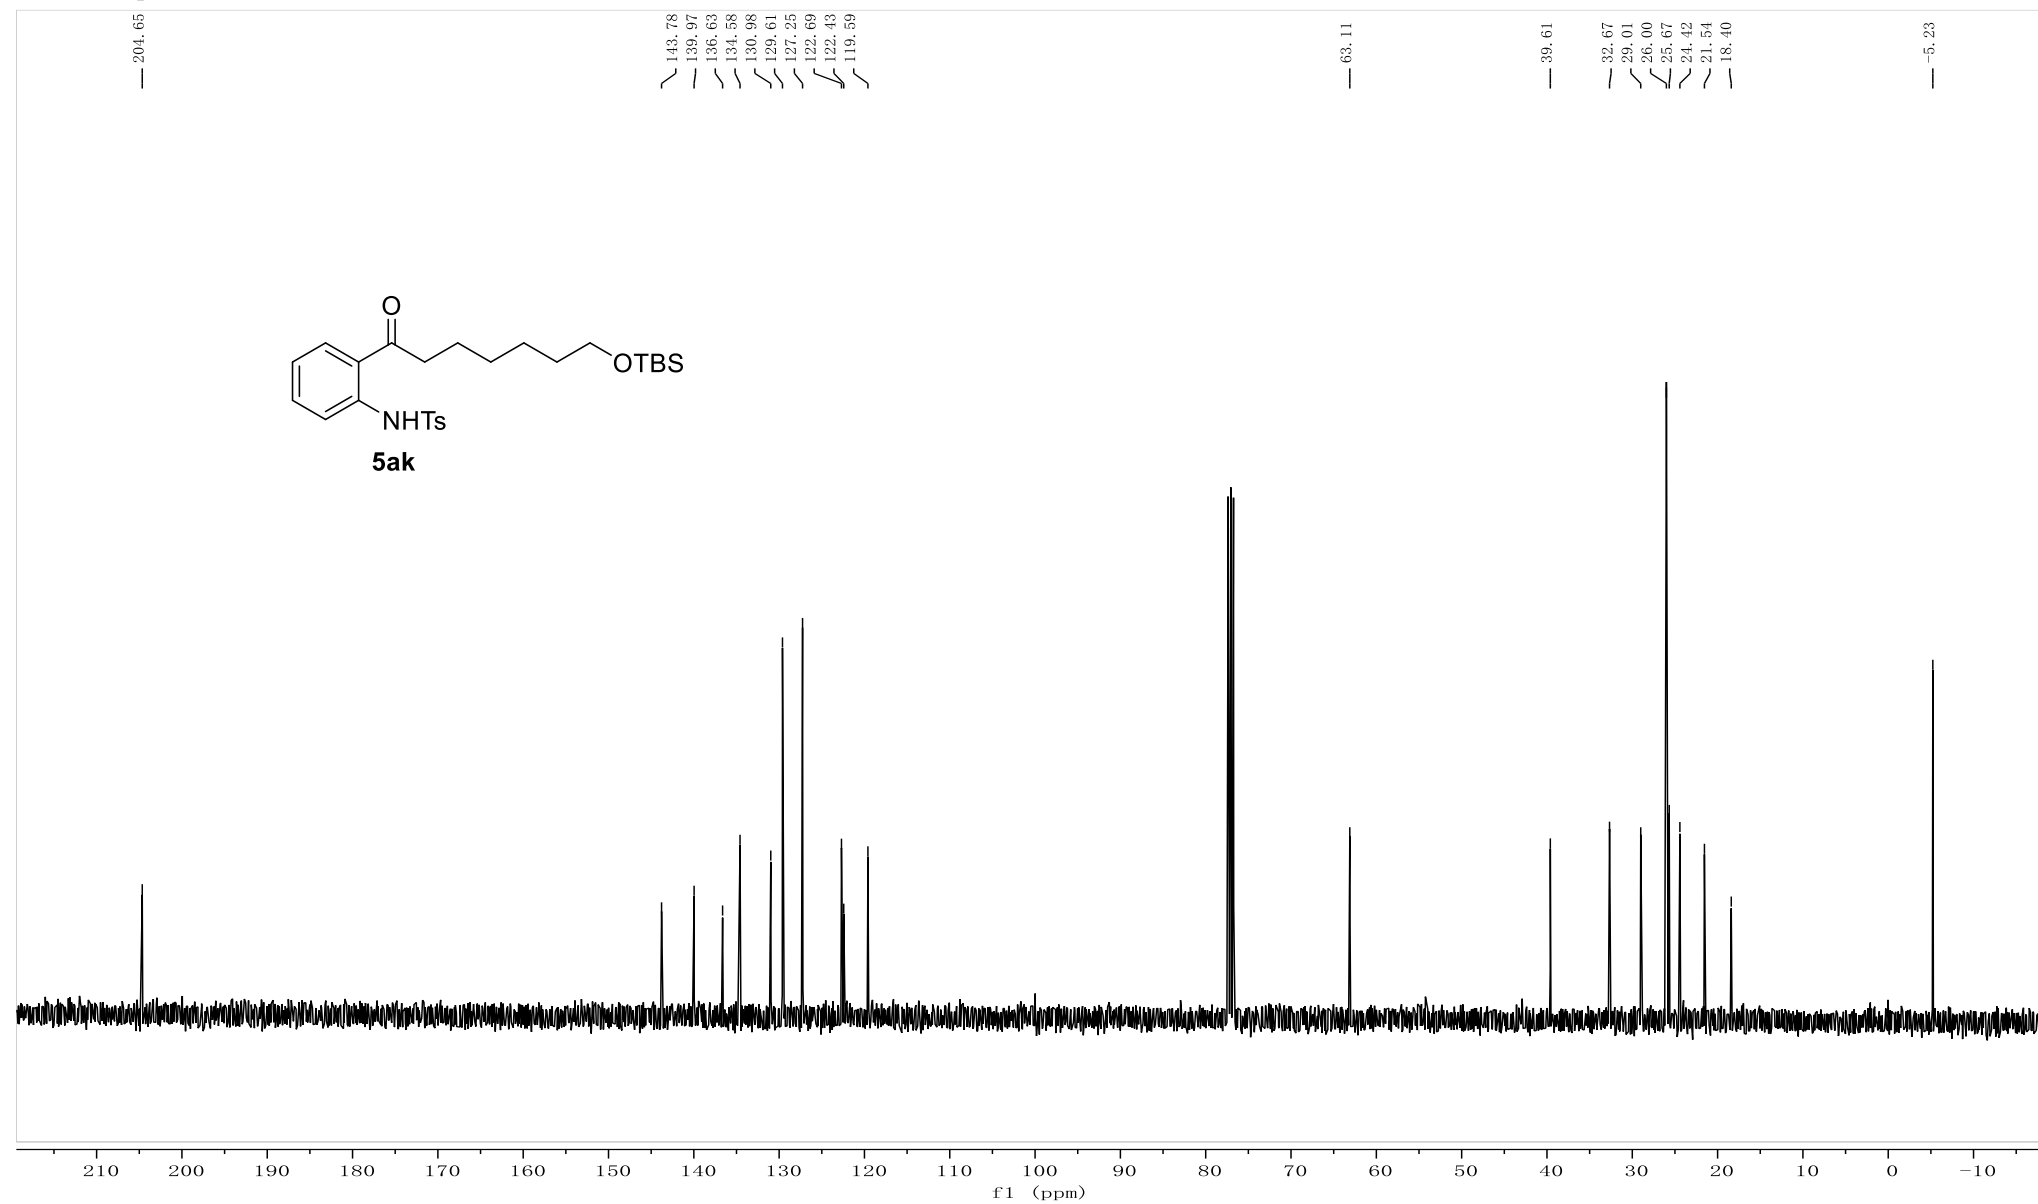

<sup>1</sup>H NMR-spectrum (400 MHz, CDCl<sub>3</sub>) of **5al**

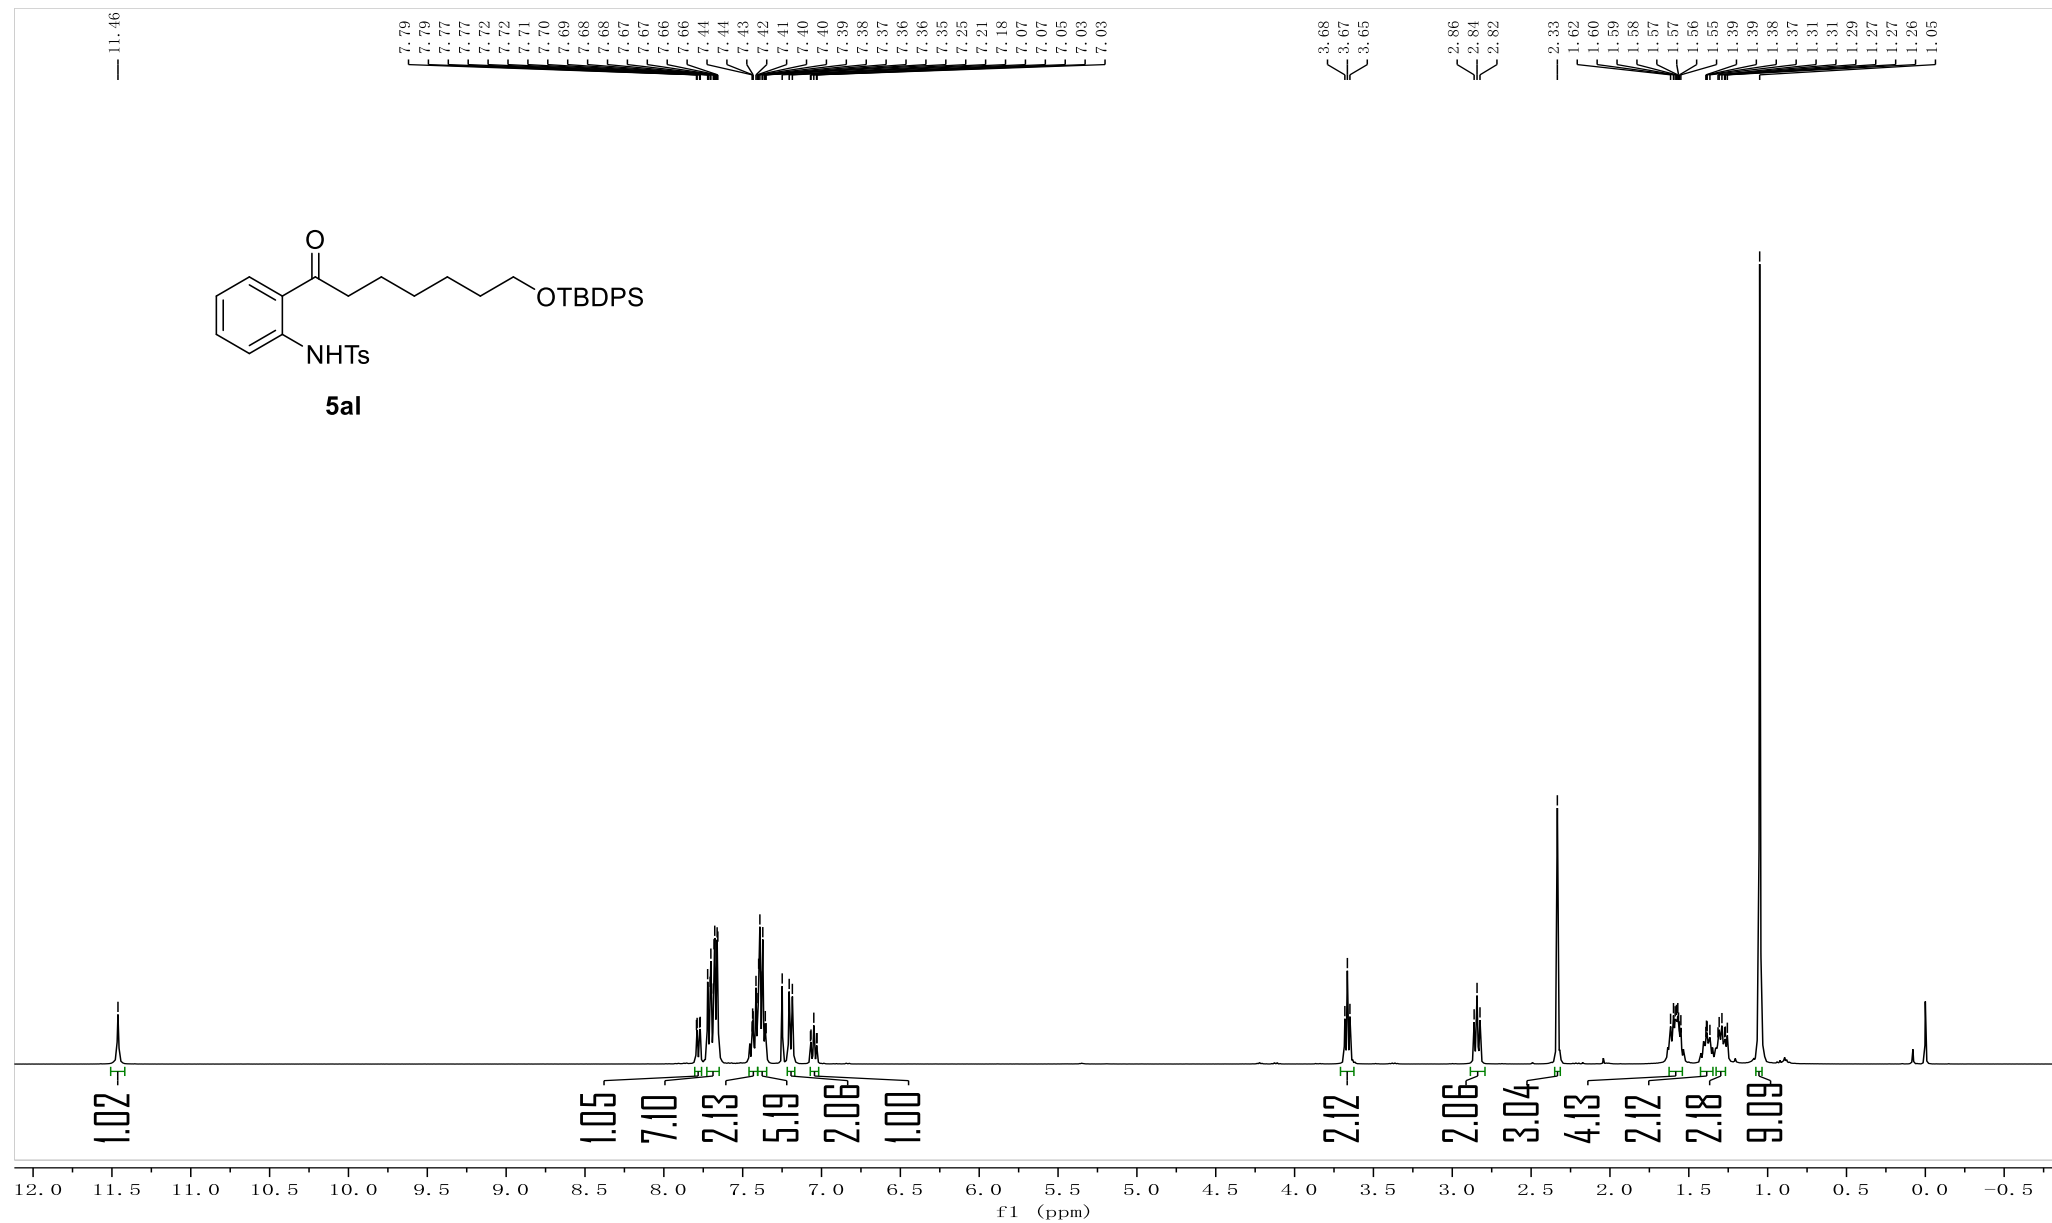

$^{13}\text{C}$ NMR-spectrum (101 MHz,  $\text{CDCl}_3$ ) of **5al**

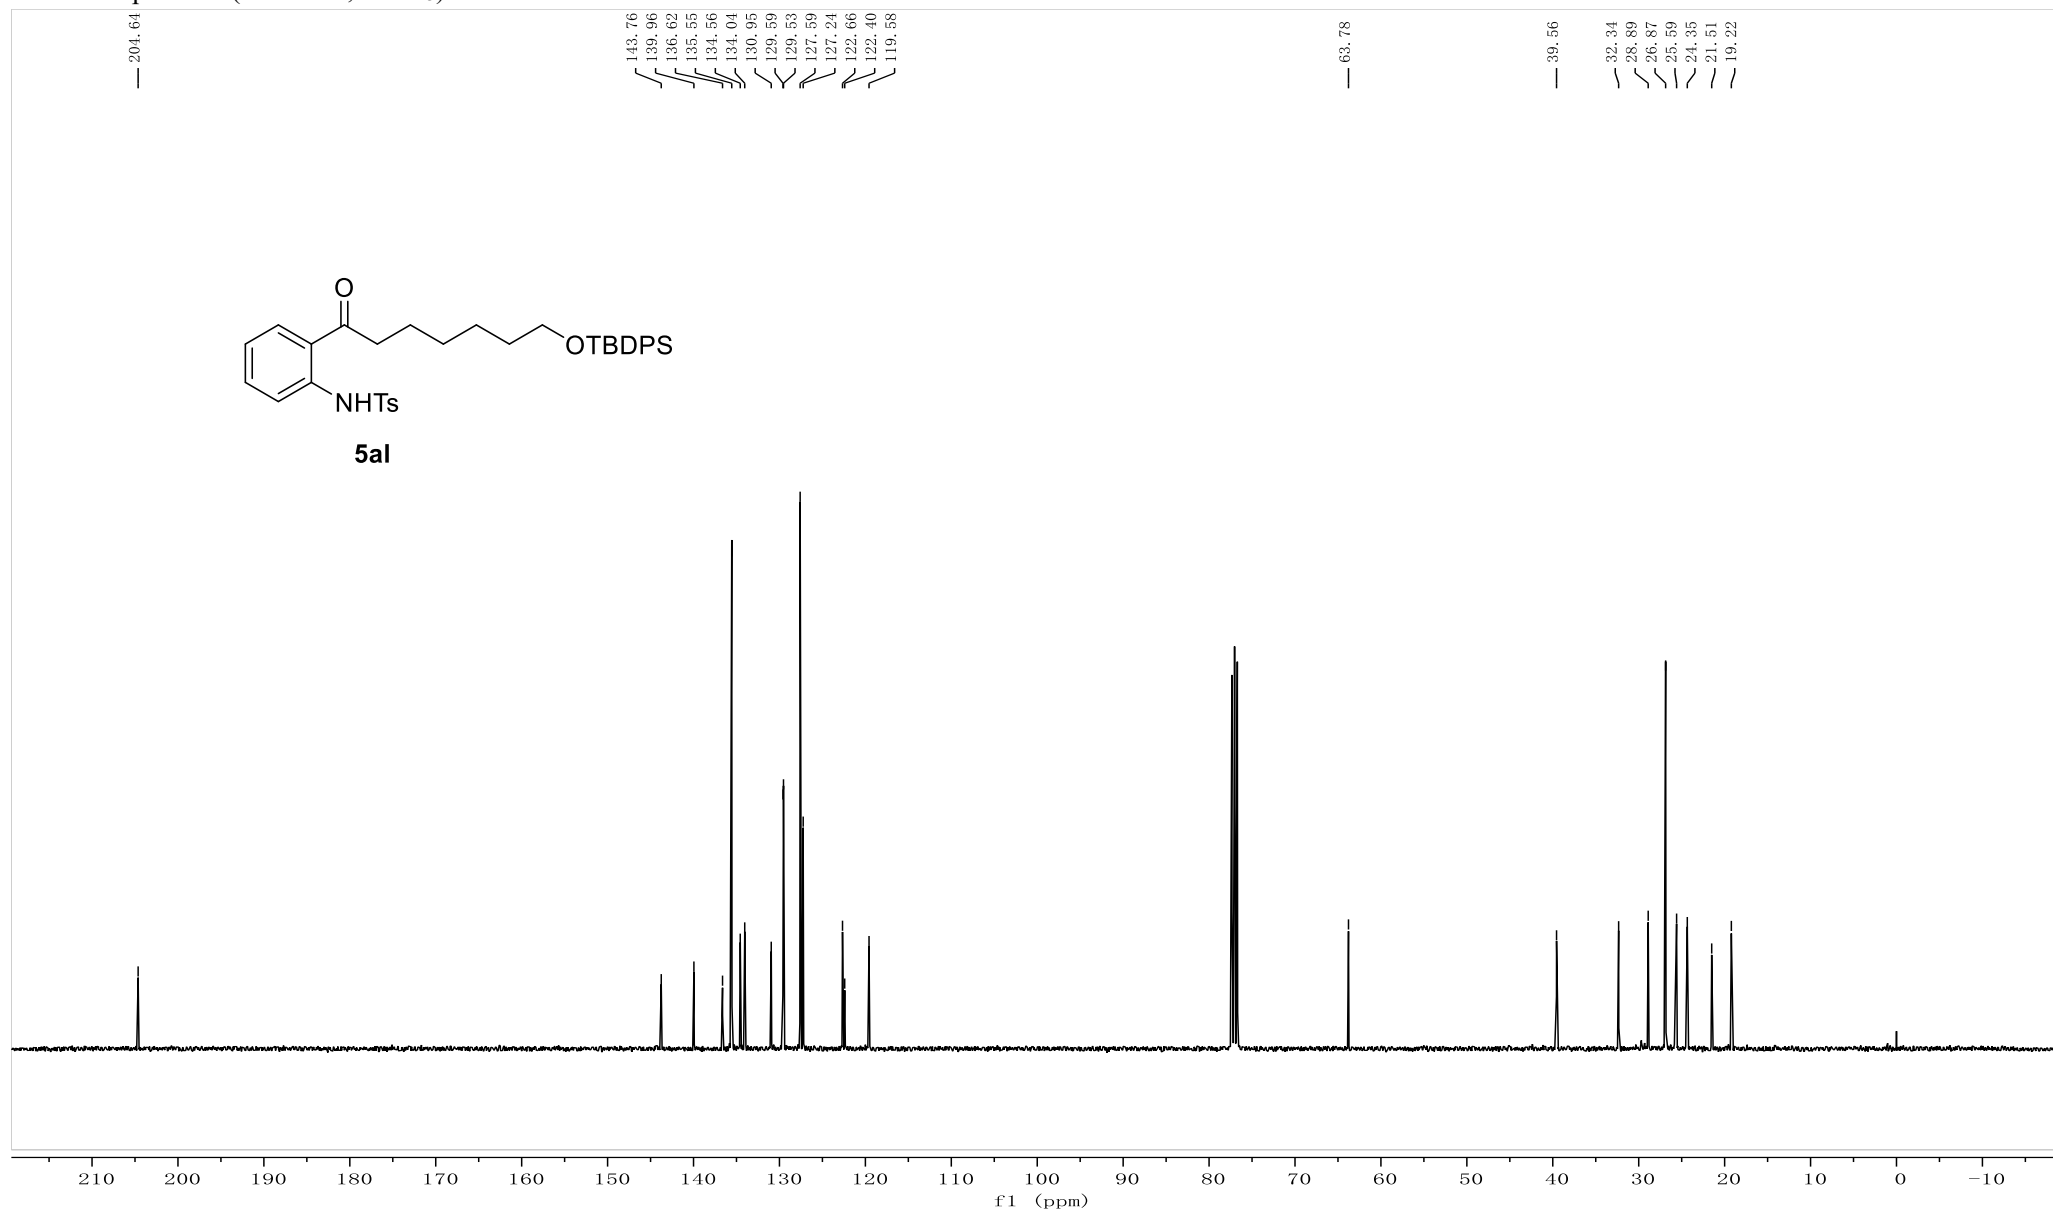



<sup>1</sup>H NMR-spectrum (500 MHz, CDCl<sub>3</sub>) of **5aq**

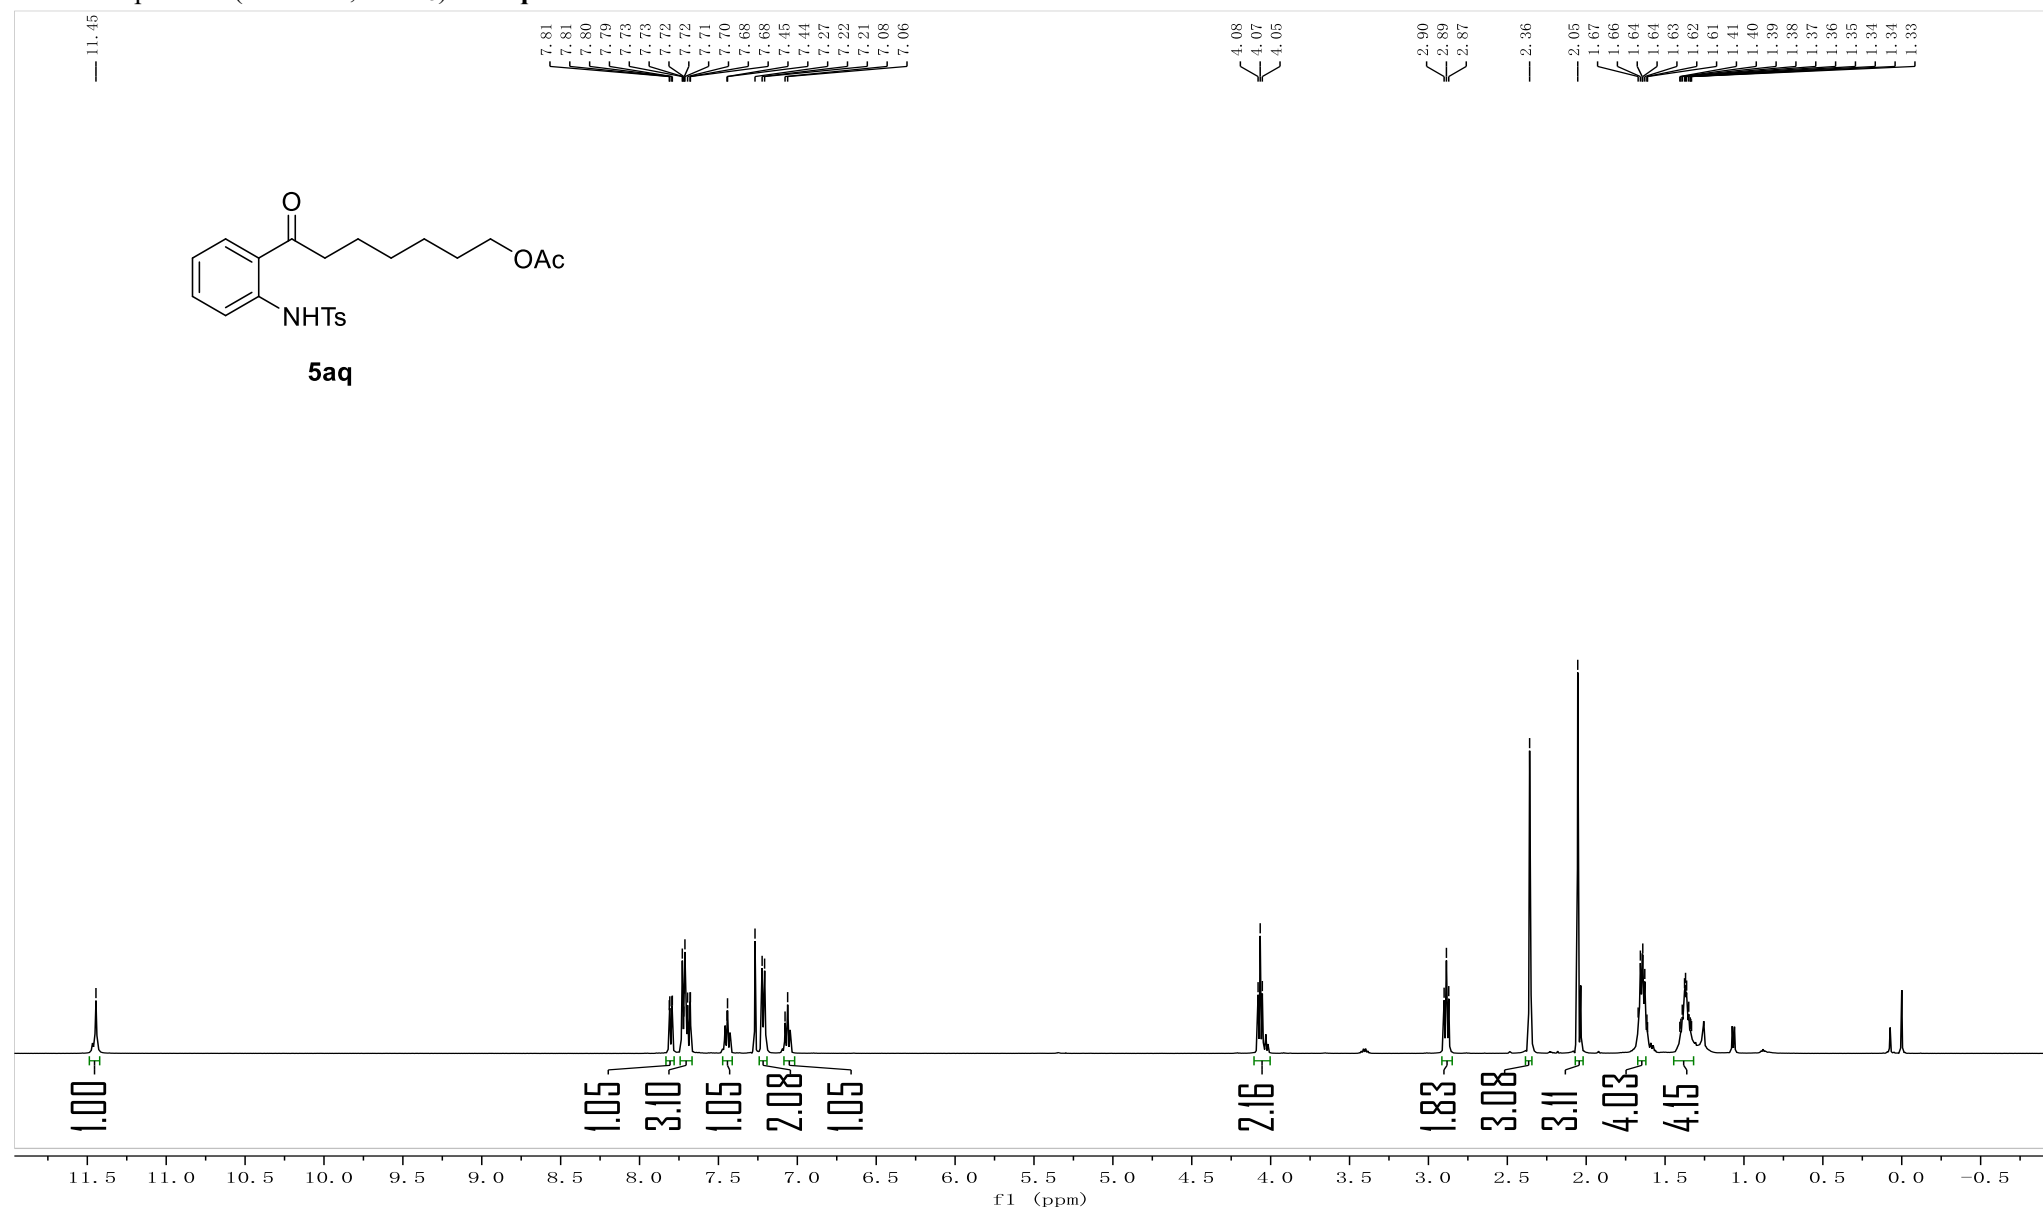

$^{13}\text{C}$ NMR-spectrum (126 MHz,  $\text{CDCl}_3$ ) of **5aq**

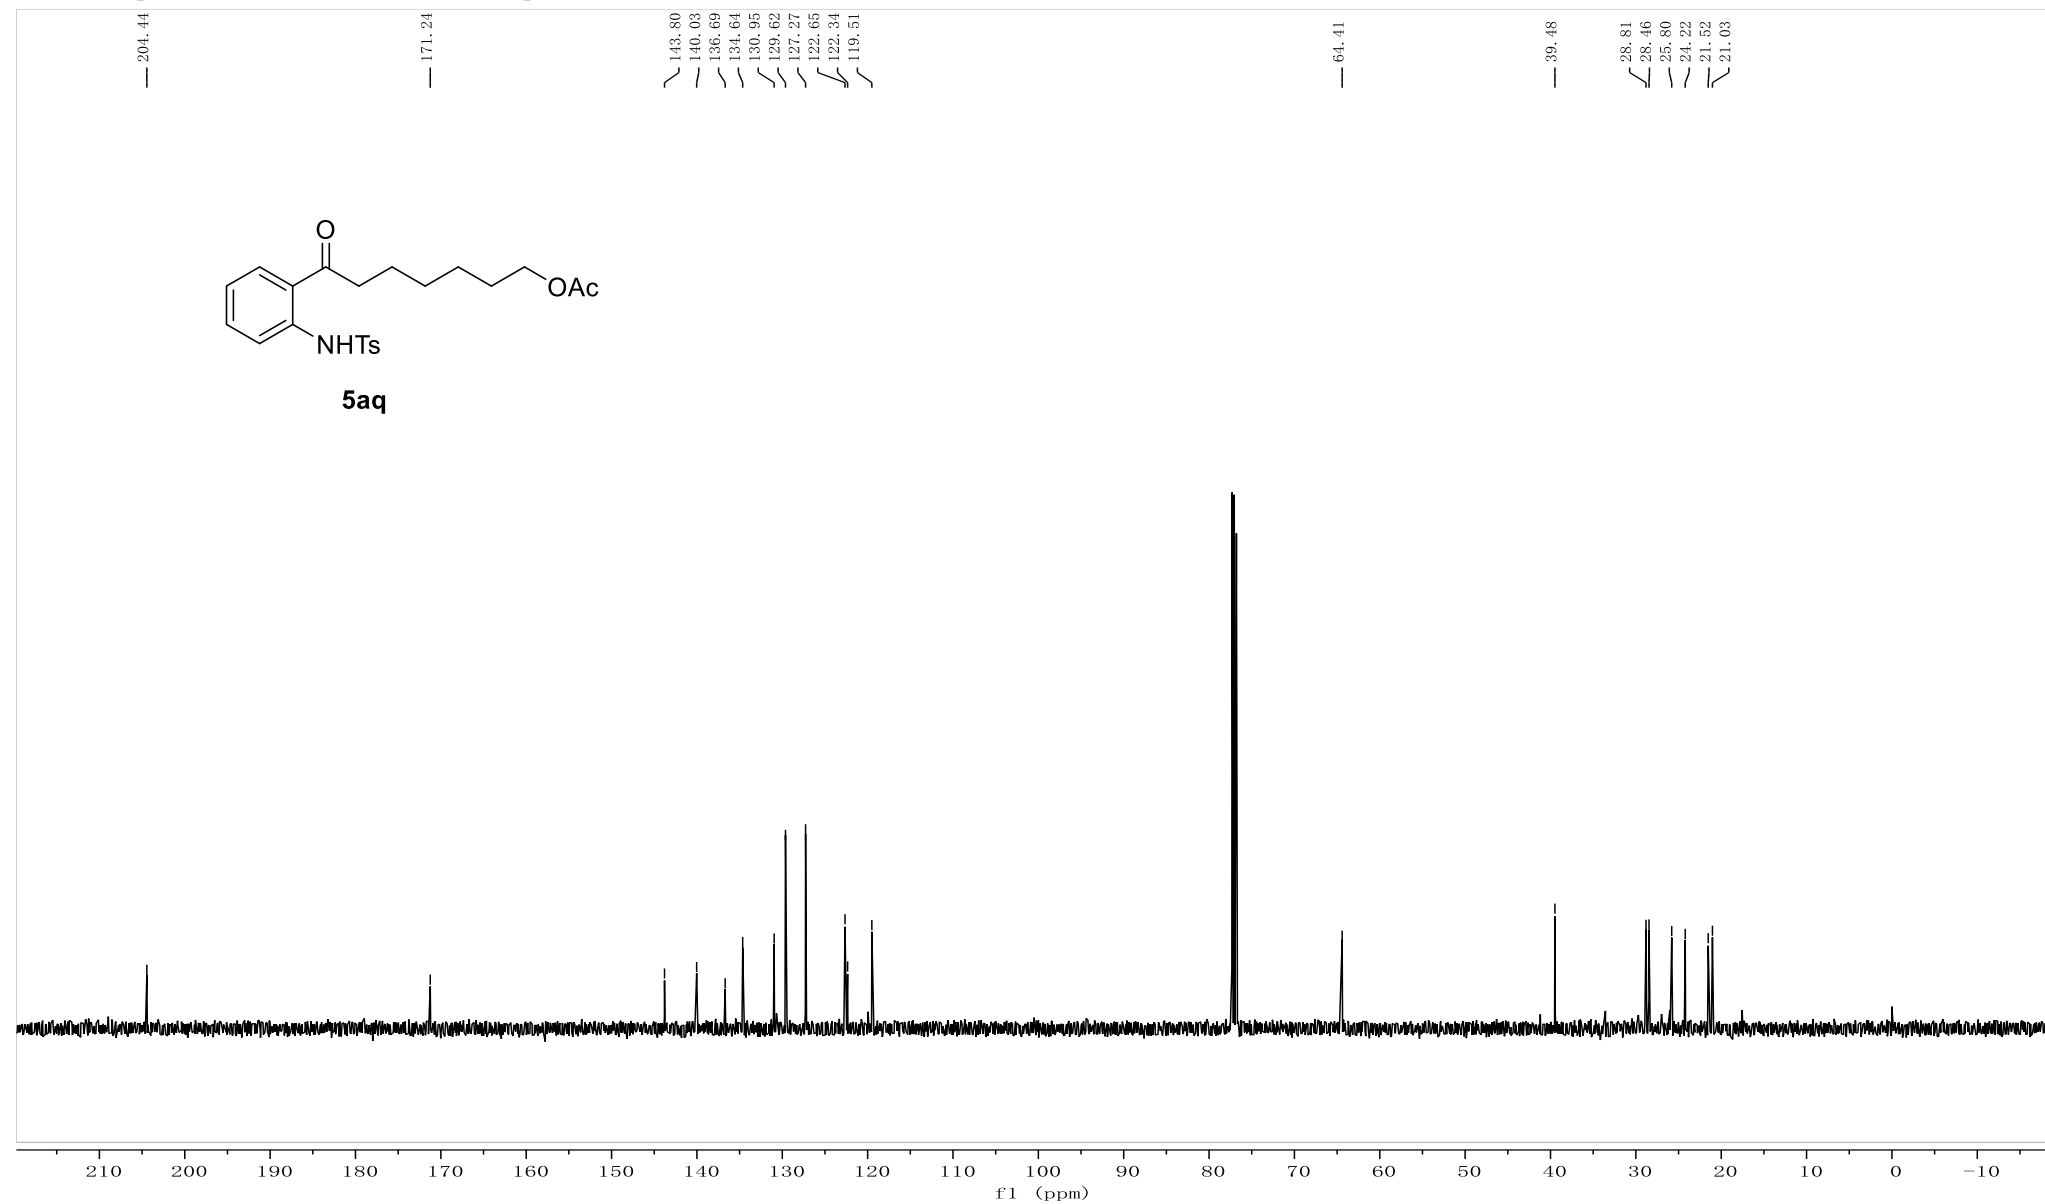

<sup>1</sup>H NMR-spectrum (500 MHz, CDCl<sub>3</sub>) of **5av**

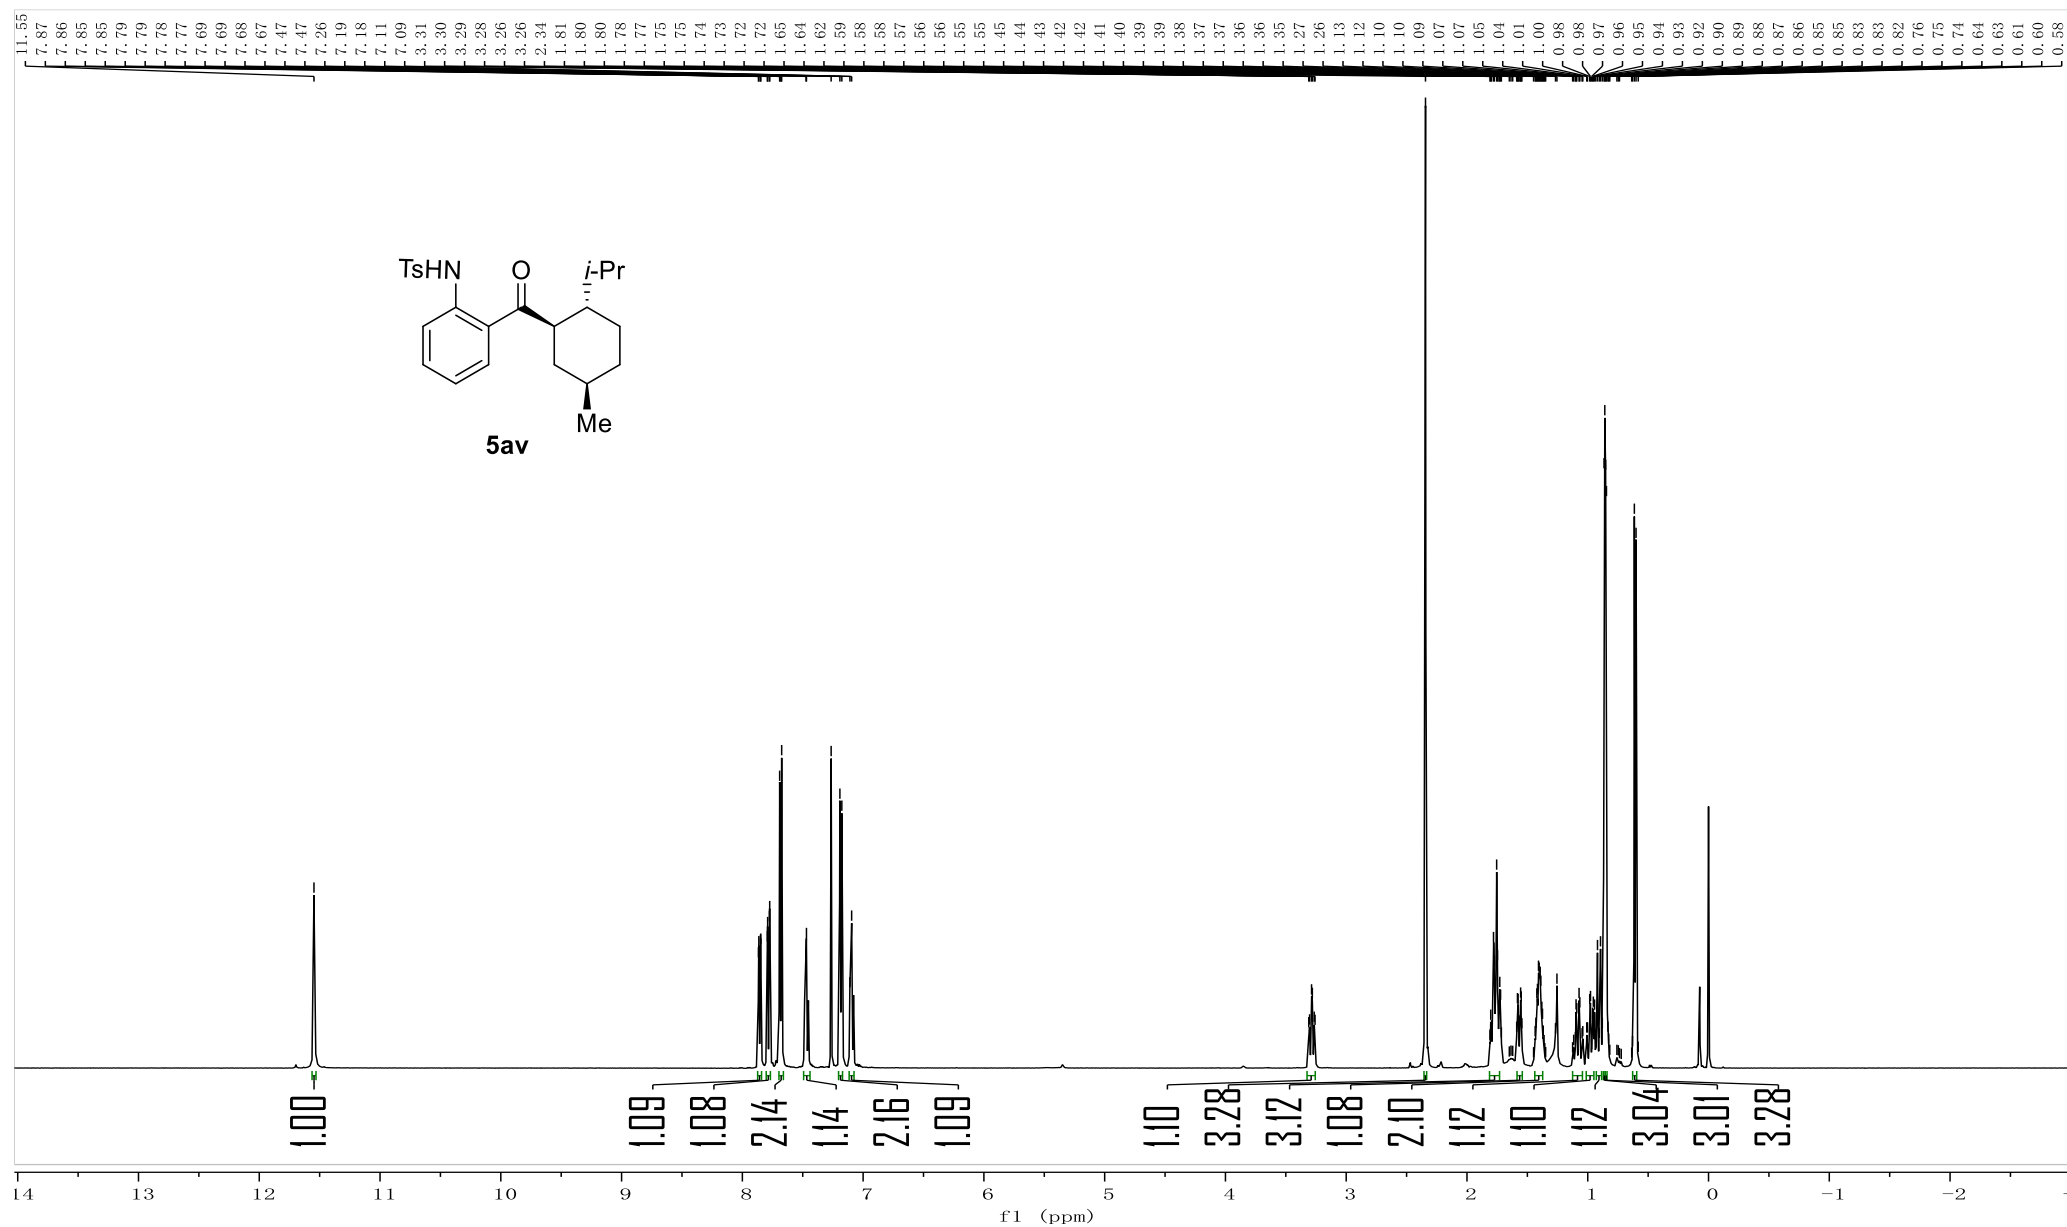

$^{13}\text{C}$ NMR-spectrum (126 MHz,  $\text{CDCl}_3$ ) of **5av**

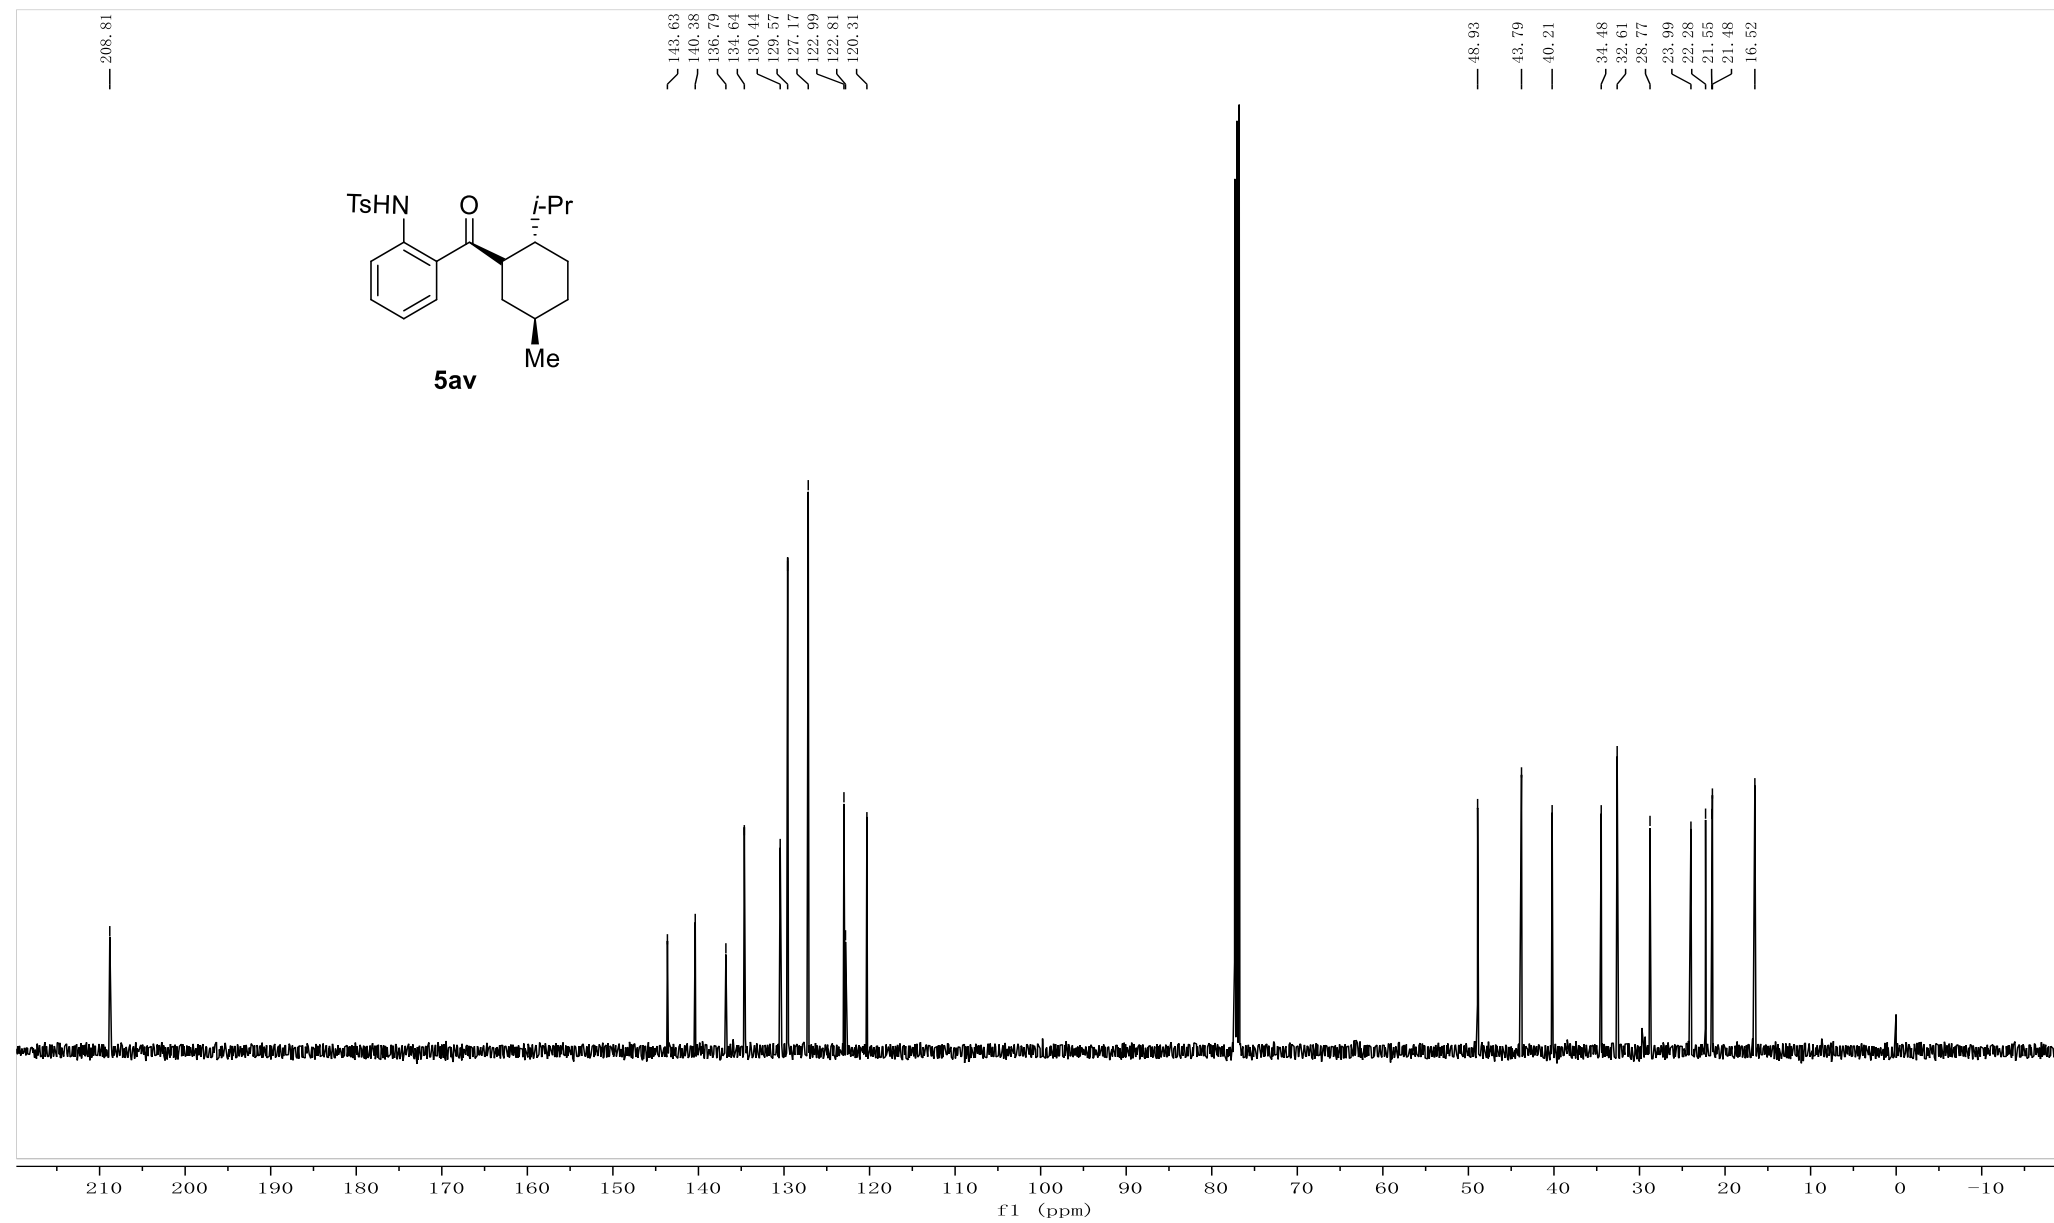

S160

COSY-spectrum of **5av**

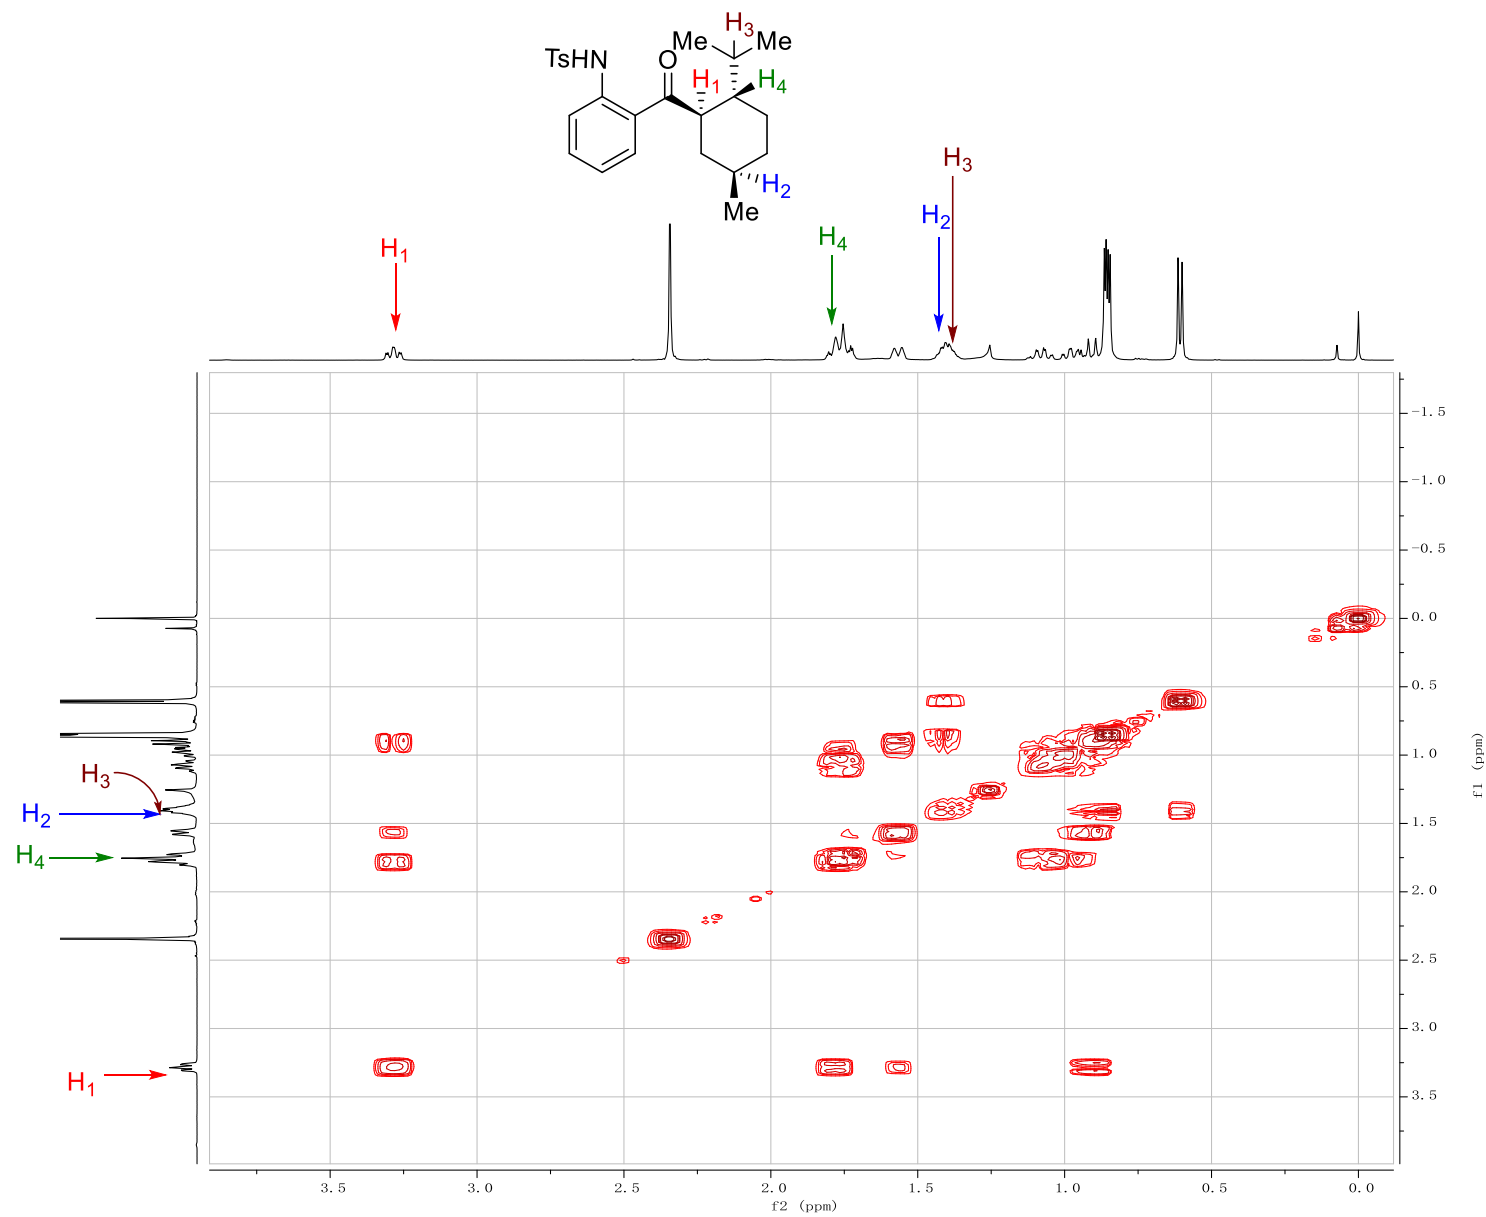

S161

DEPT-135°-spectrum of **5av**

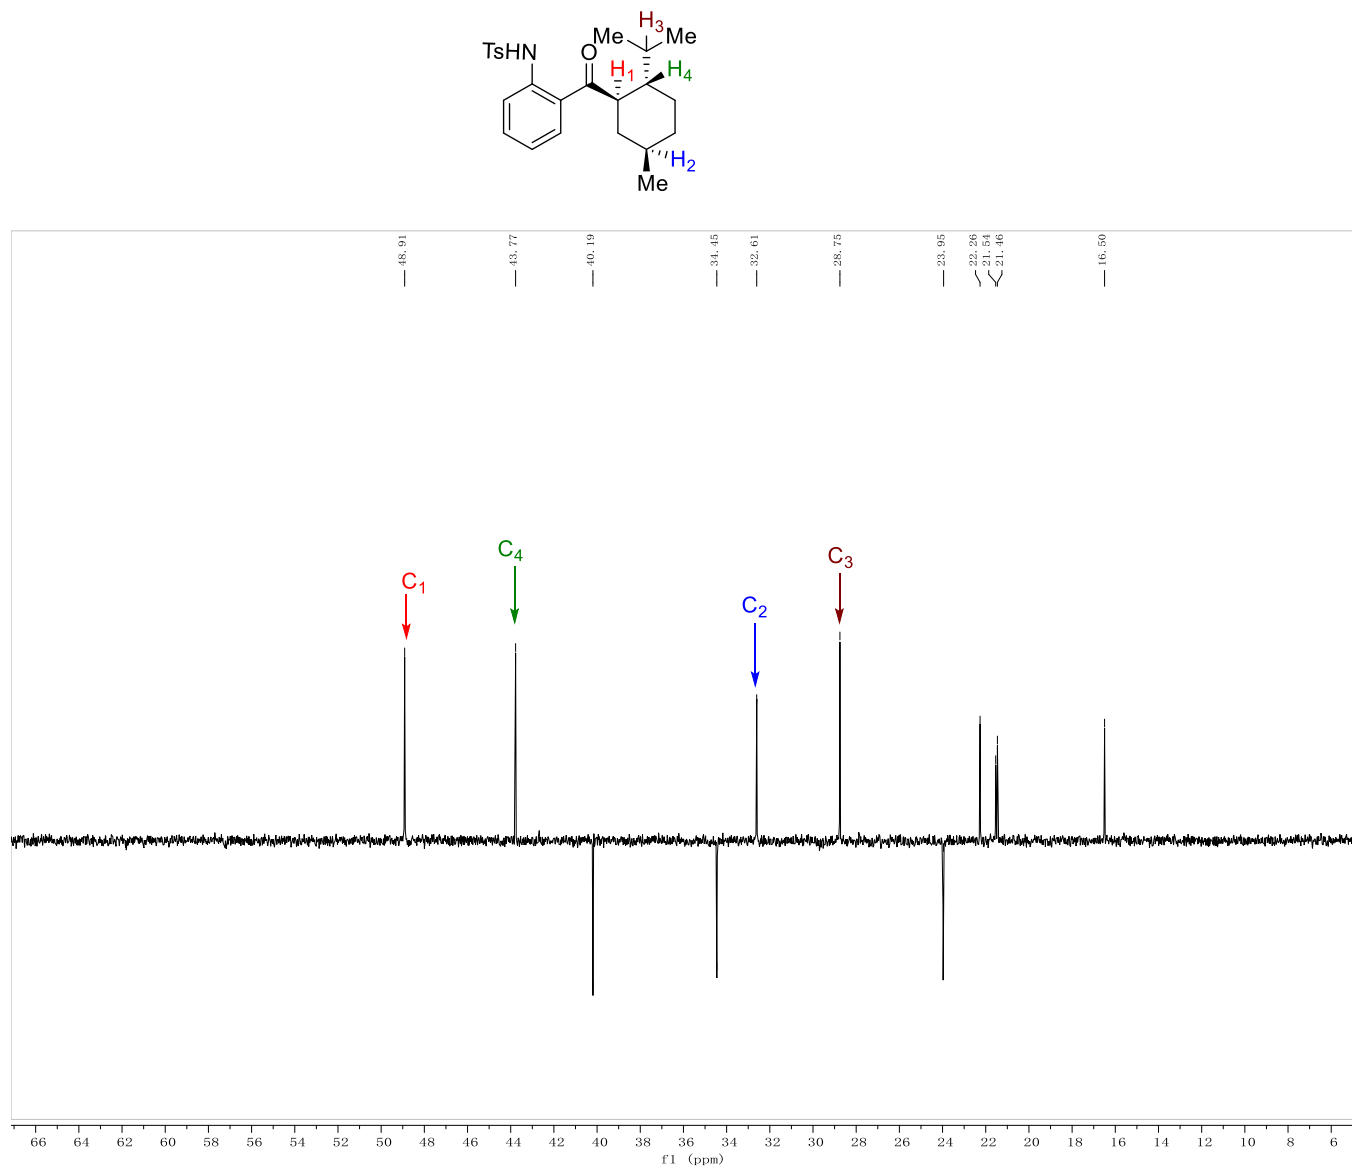

HSQC-spectrum of **5av**

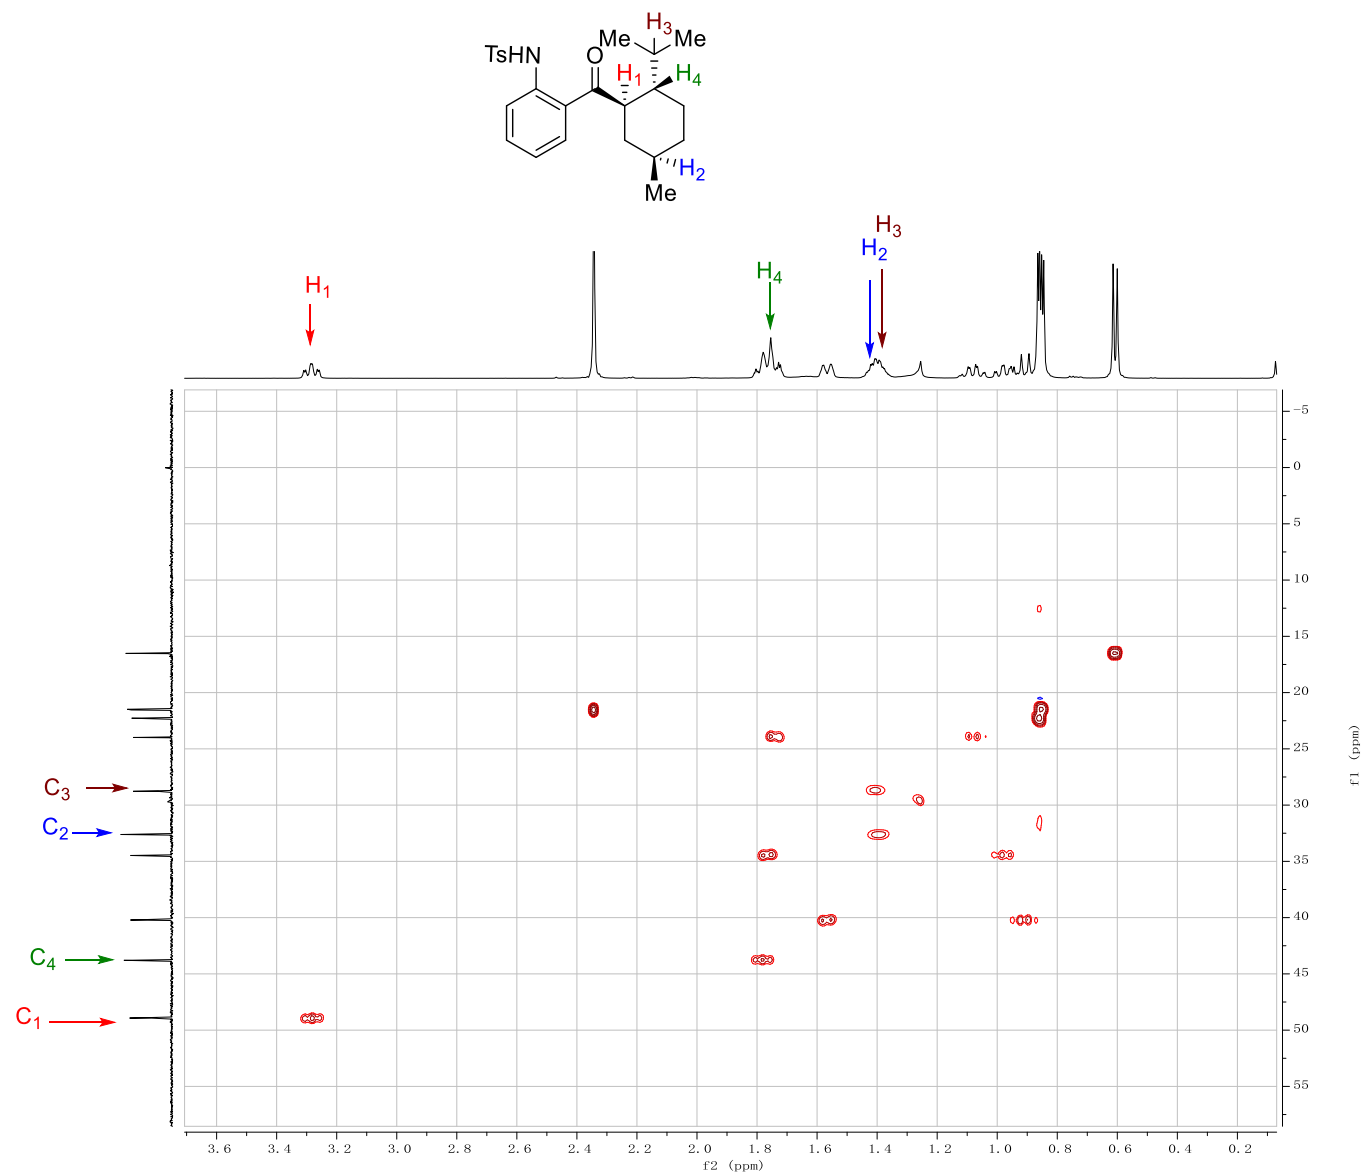

NOSEY-spectrum of **5av**

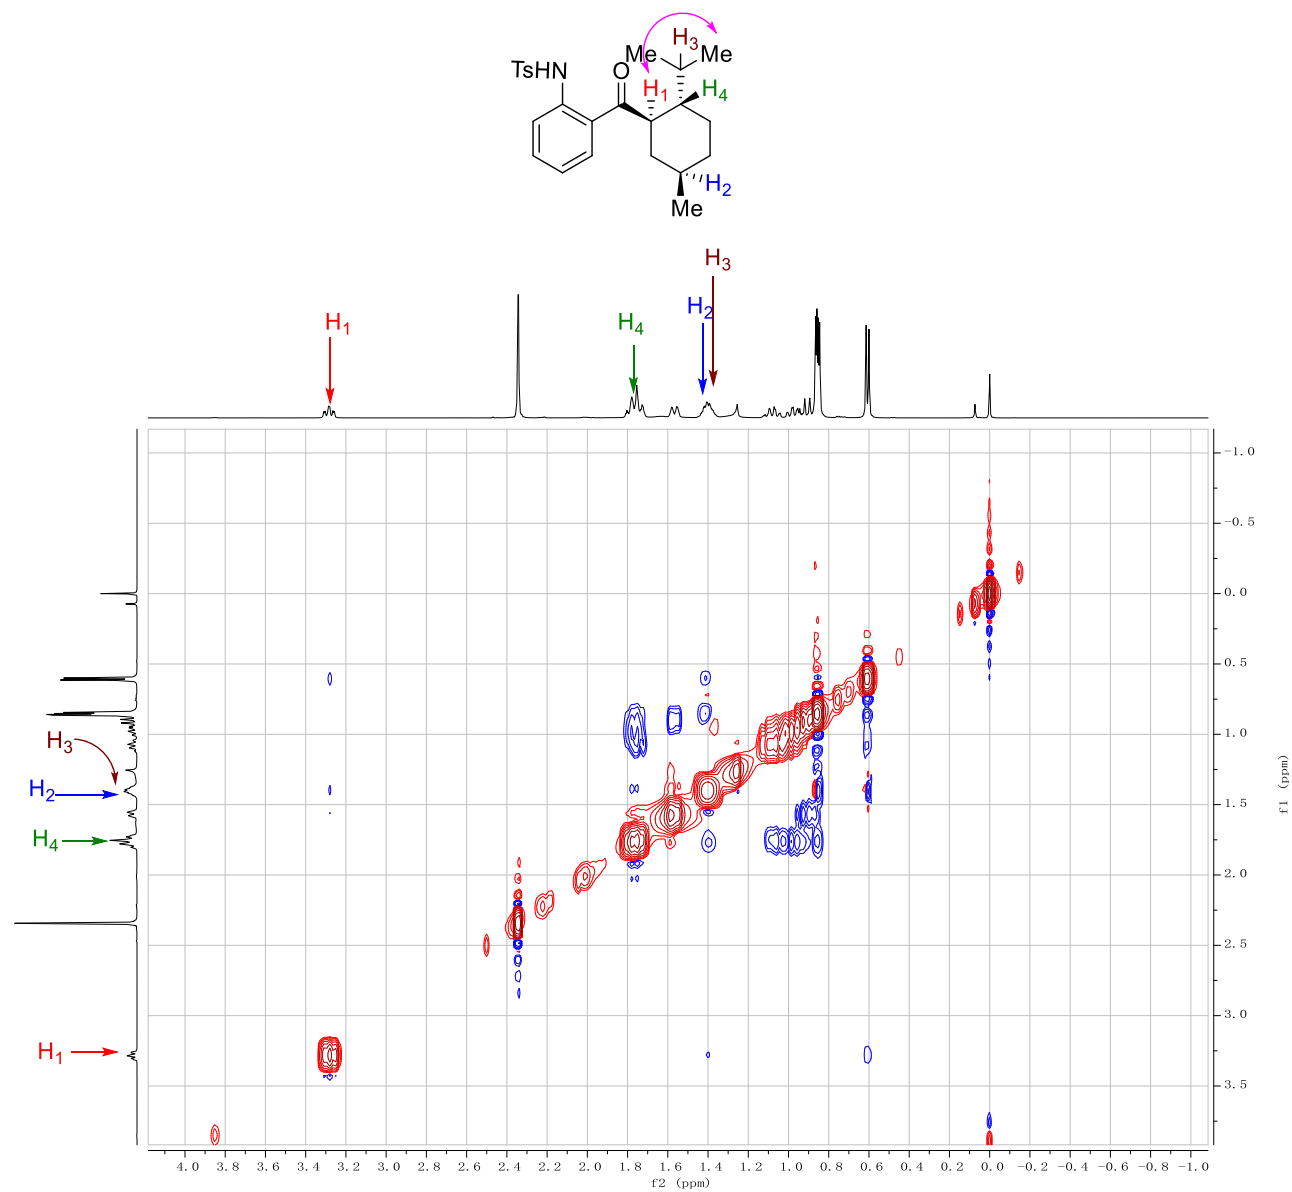



<sup>1</sup>H NMR-spectrum (500 MHz, CDCl<sub>3</sub>) of **5aw**

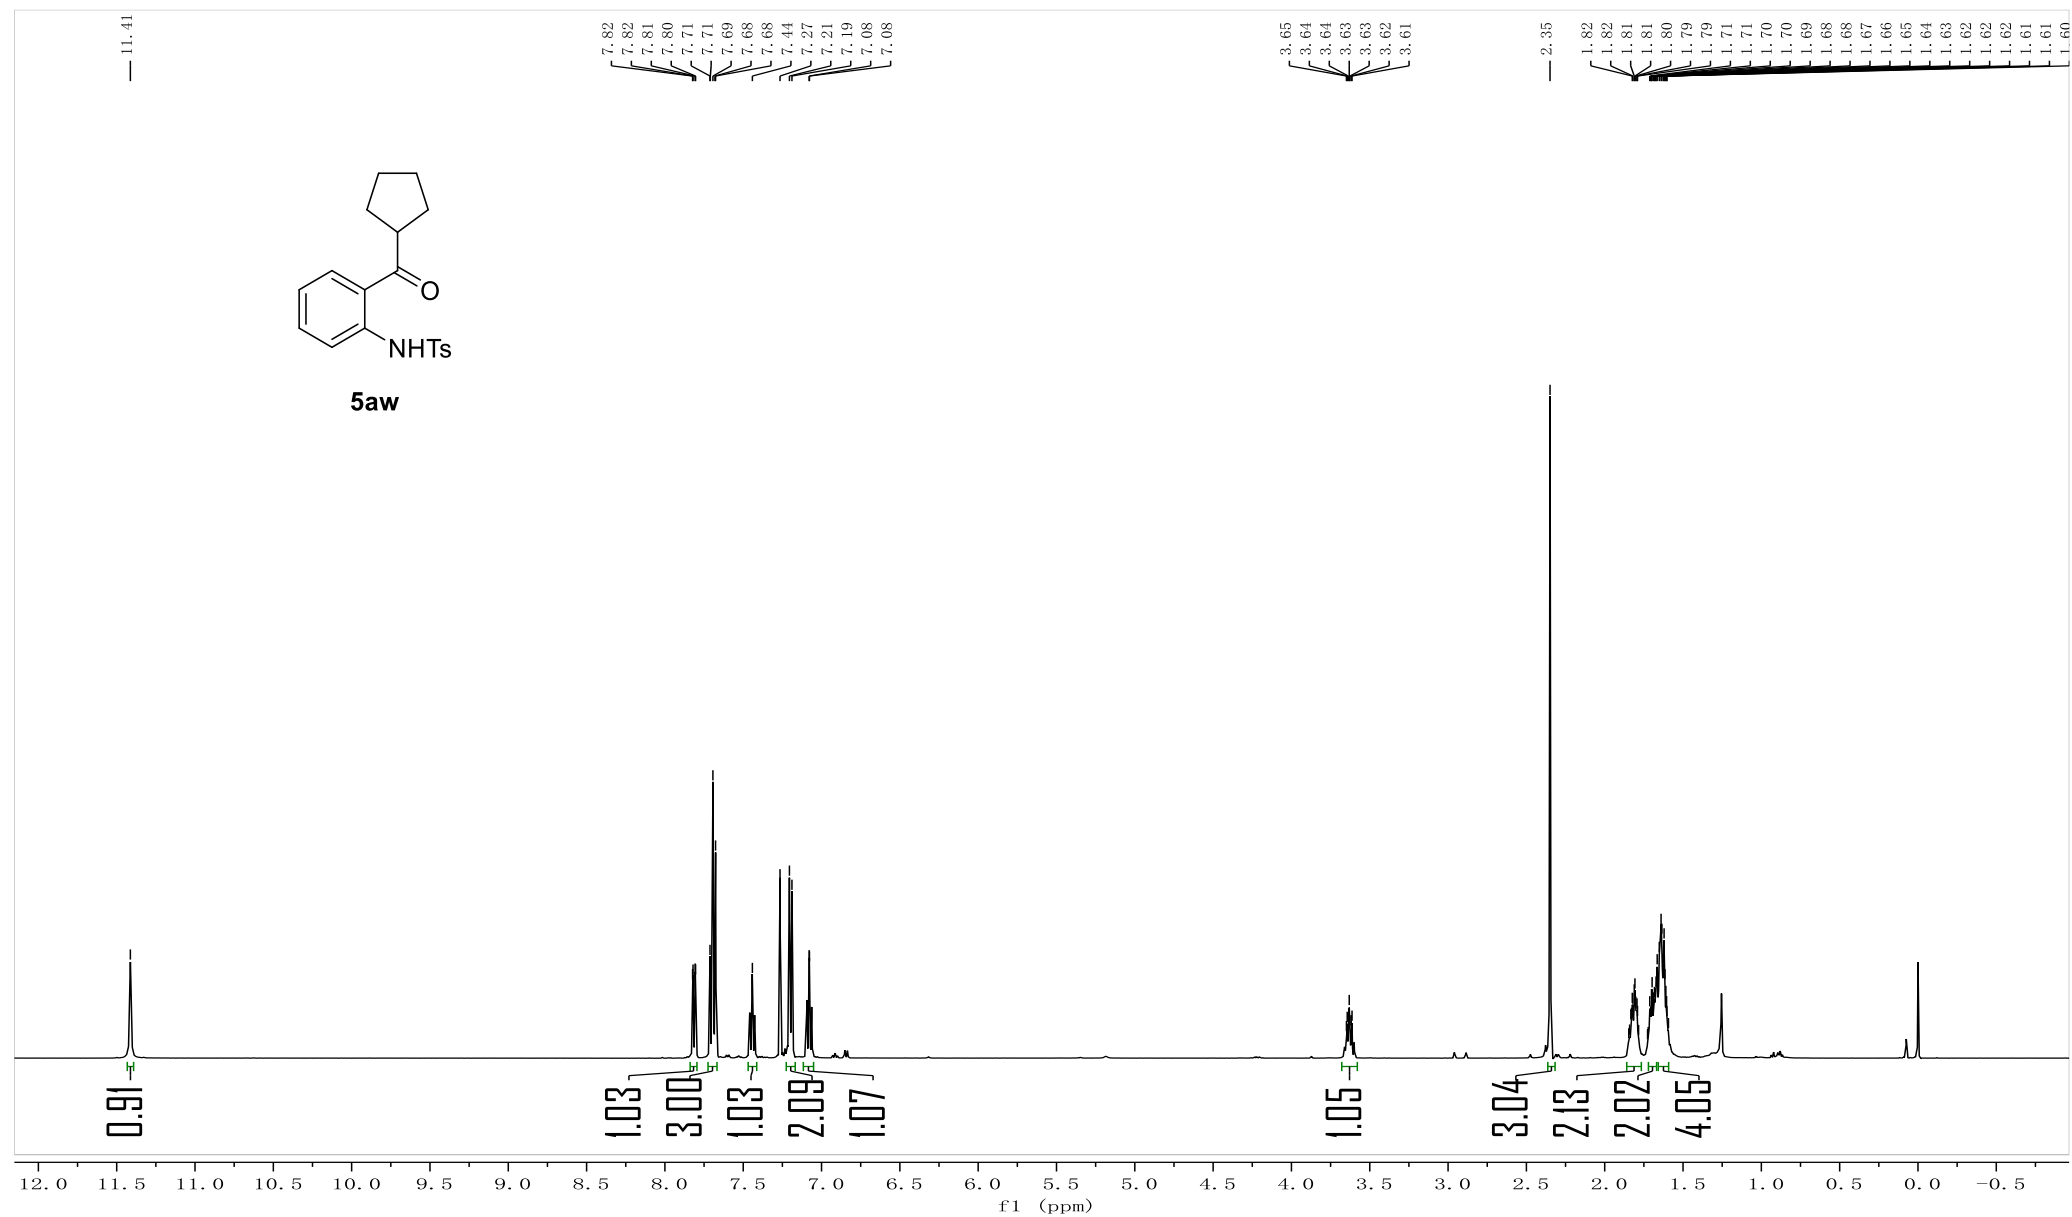

<sup>13</sup>C NMR-spectrum (126 MHz, CDCl<sub>3</sub>) of **5aw**

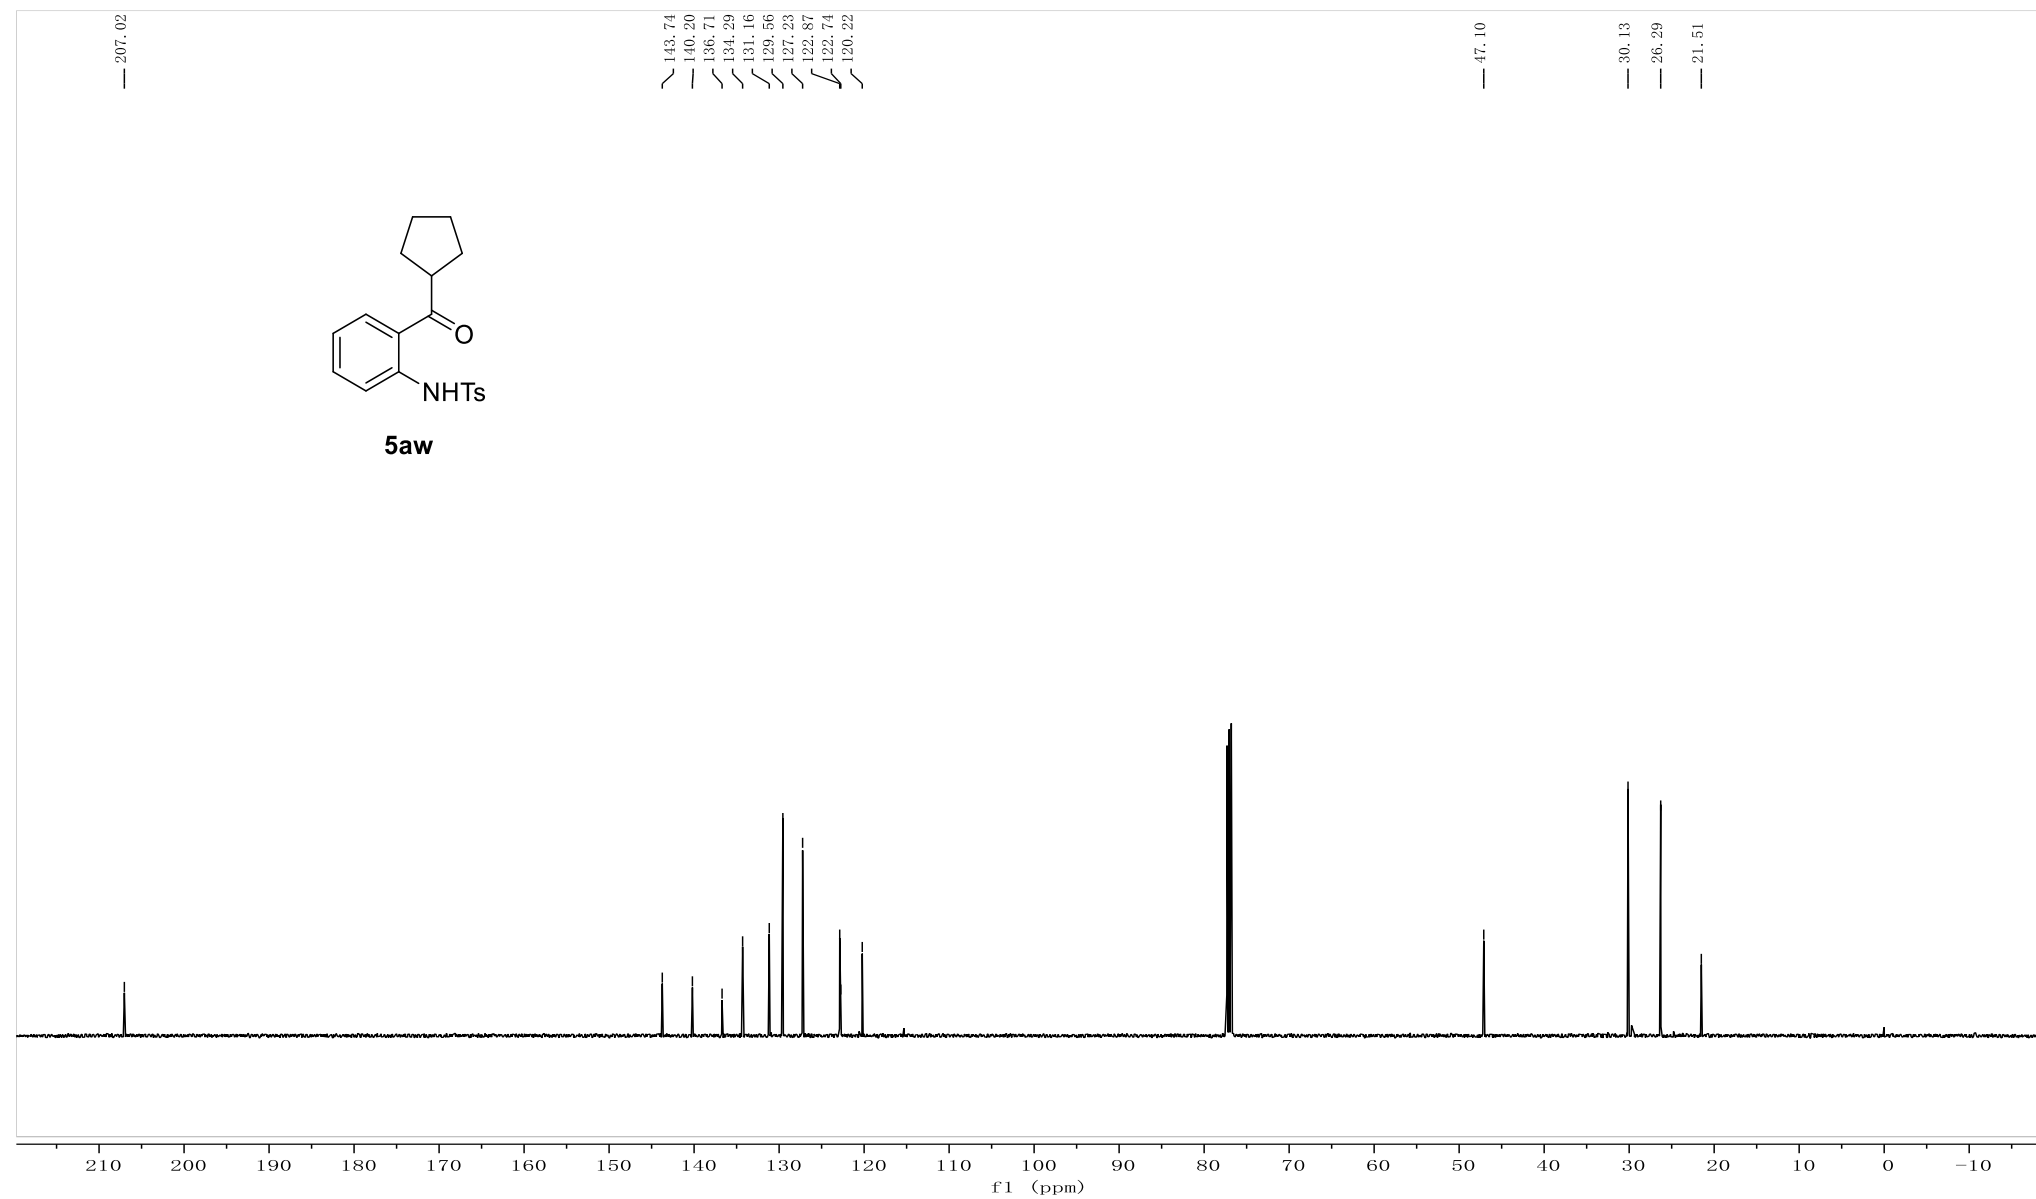

<sup>1</sup>H NMR-spectrum (500 MHz, CDCl<sub>3</sub>) of **5ax**

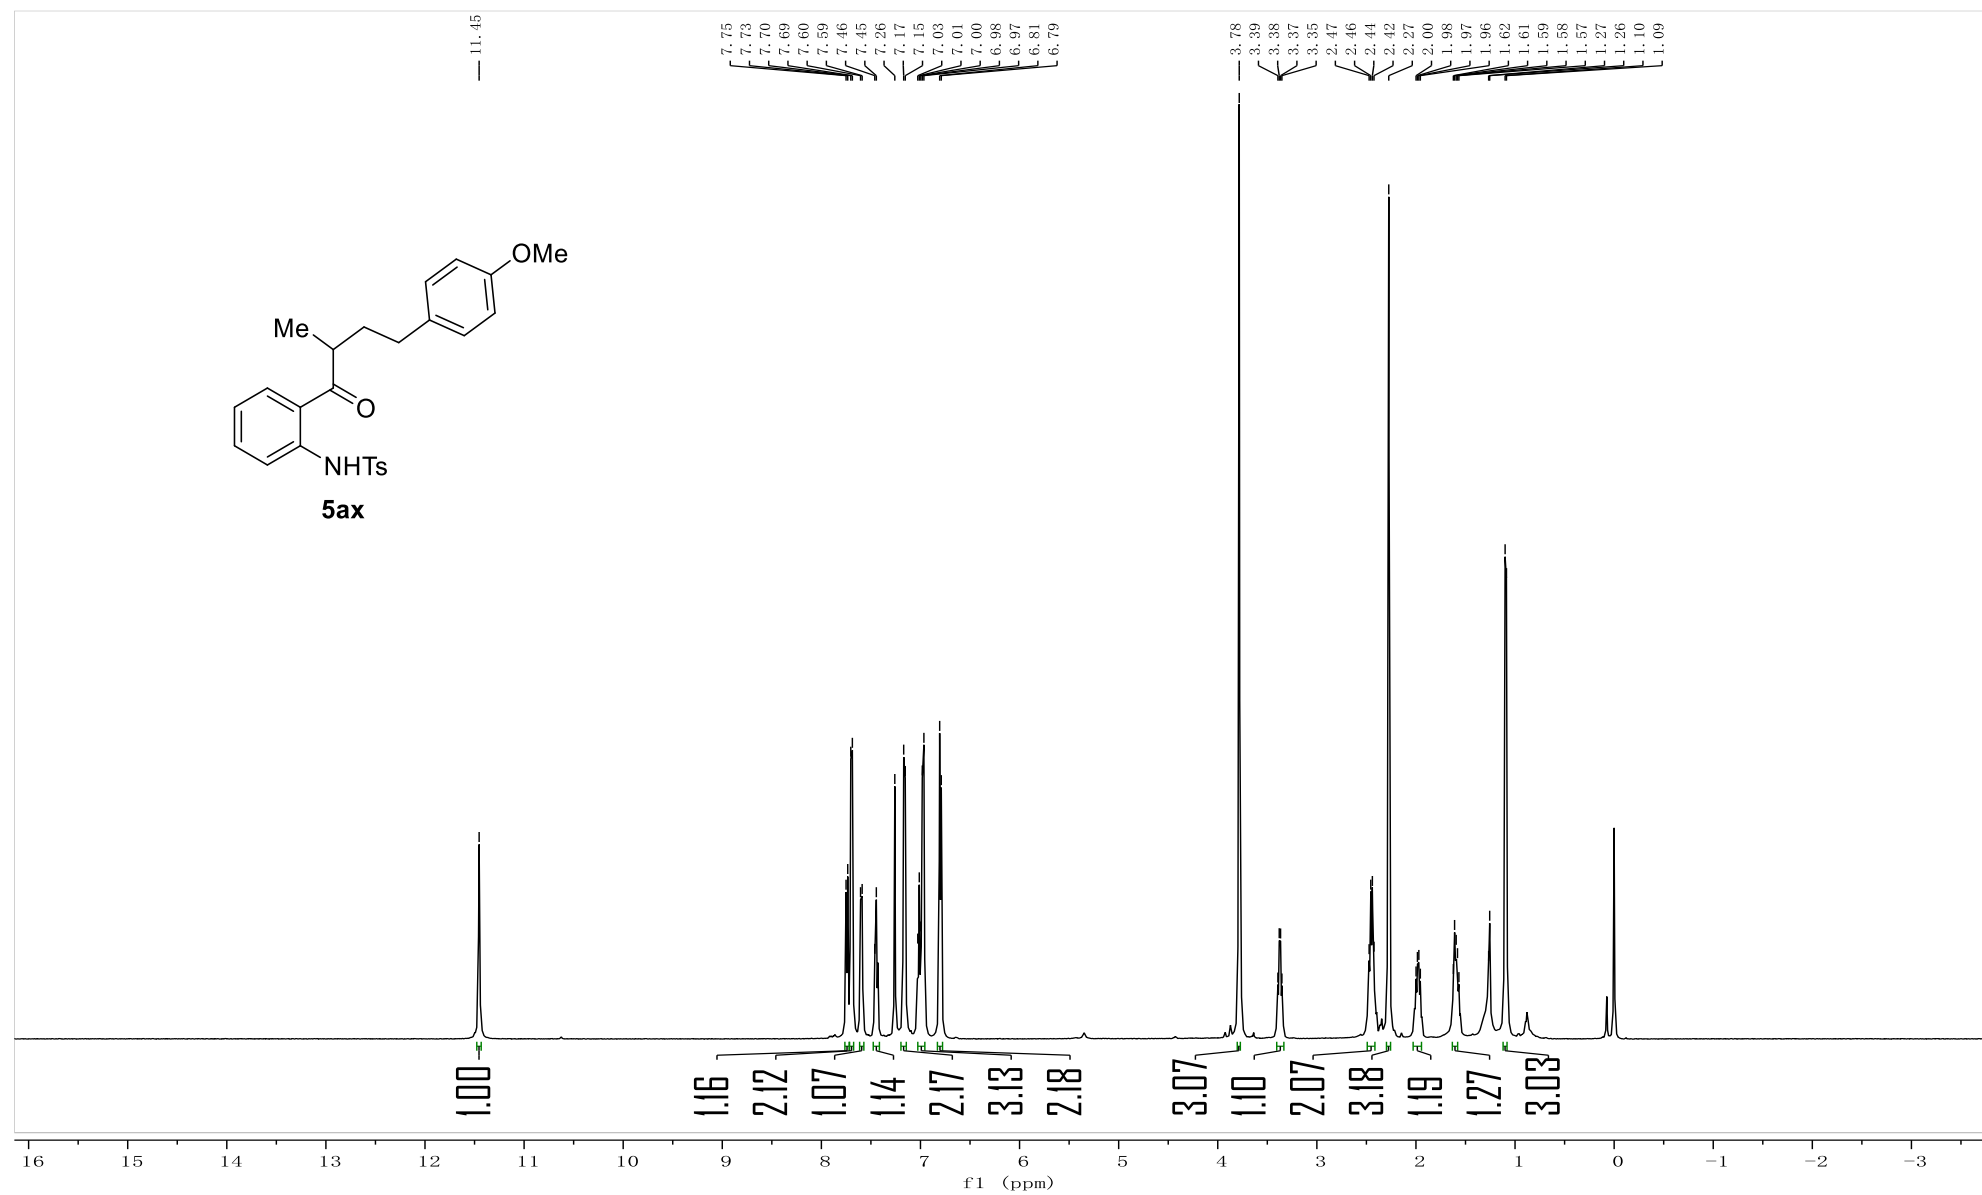

$^{13}\text{C}$  NMR-spectrum (126 MHz,  $\text{CDCl}_3$ ) of **5ax**

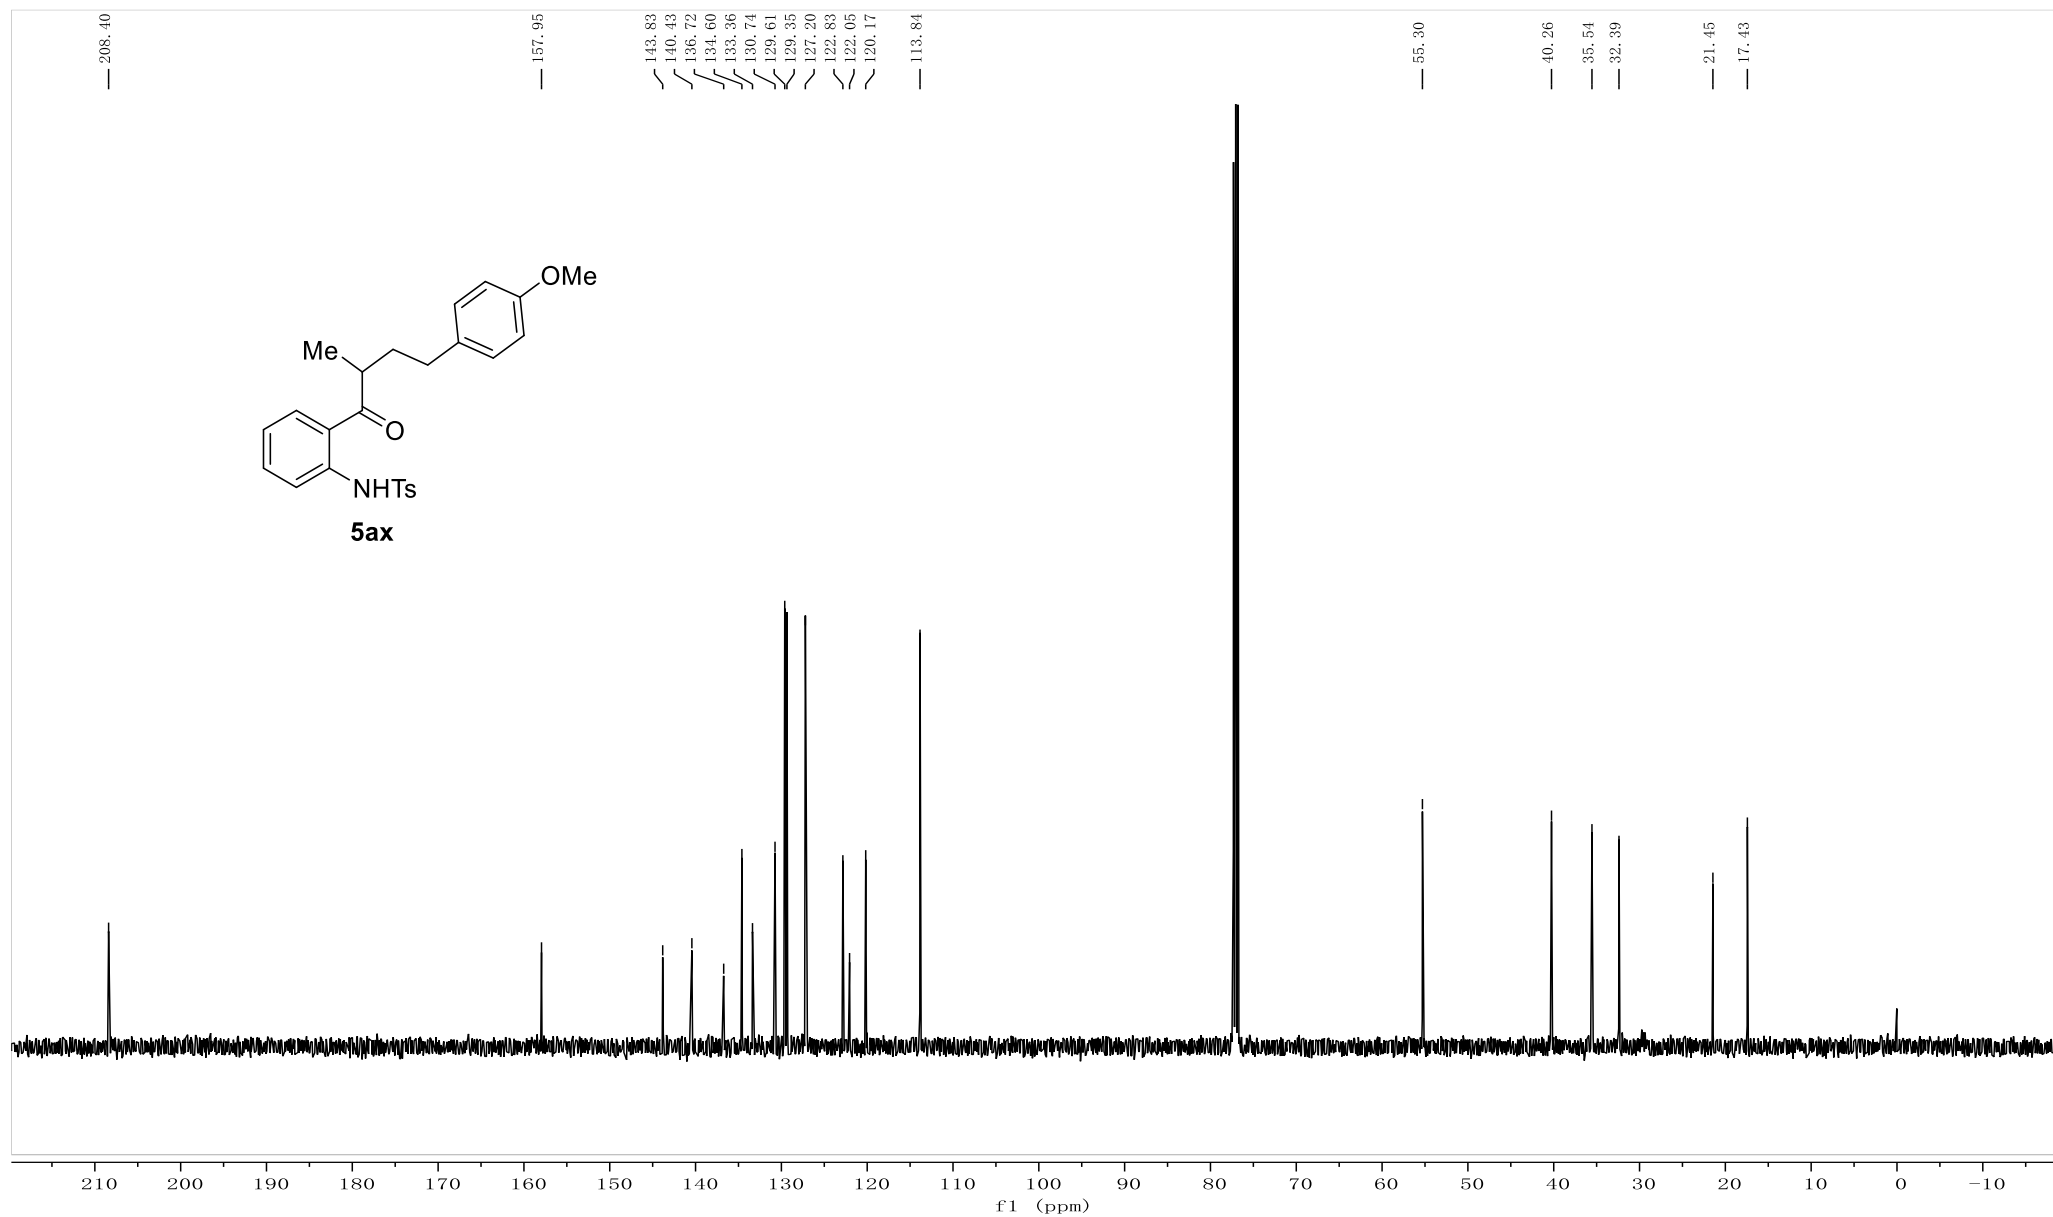

S168

<sup>1</sup>H NMR-spectrum (400 MHz, CDCl<sub>3</sub>) of **5bk**

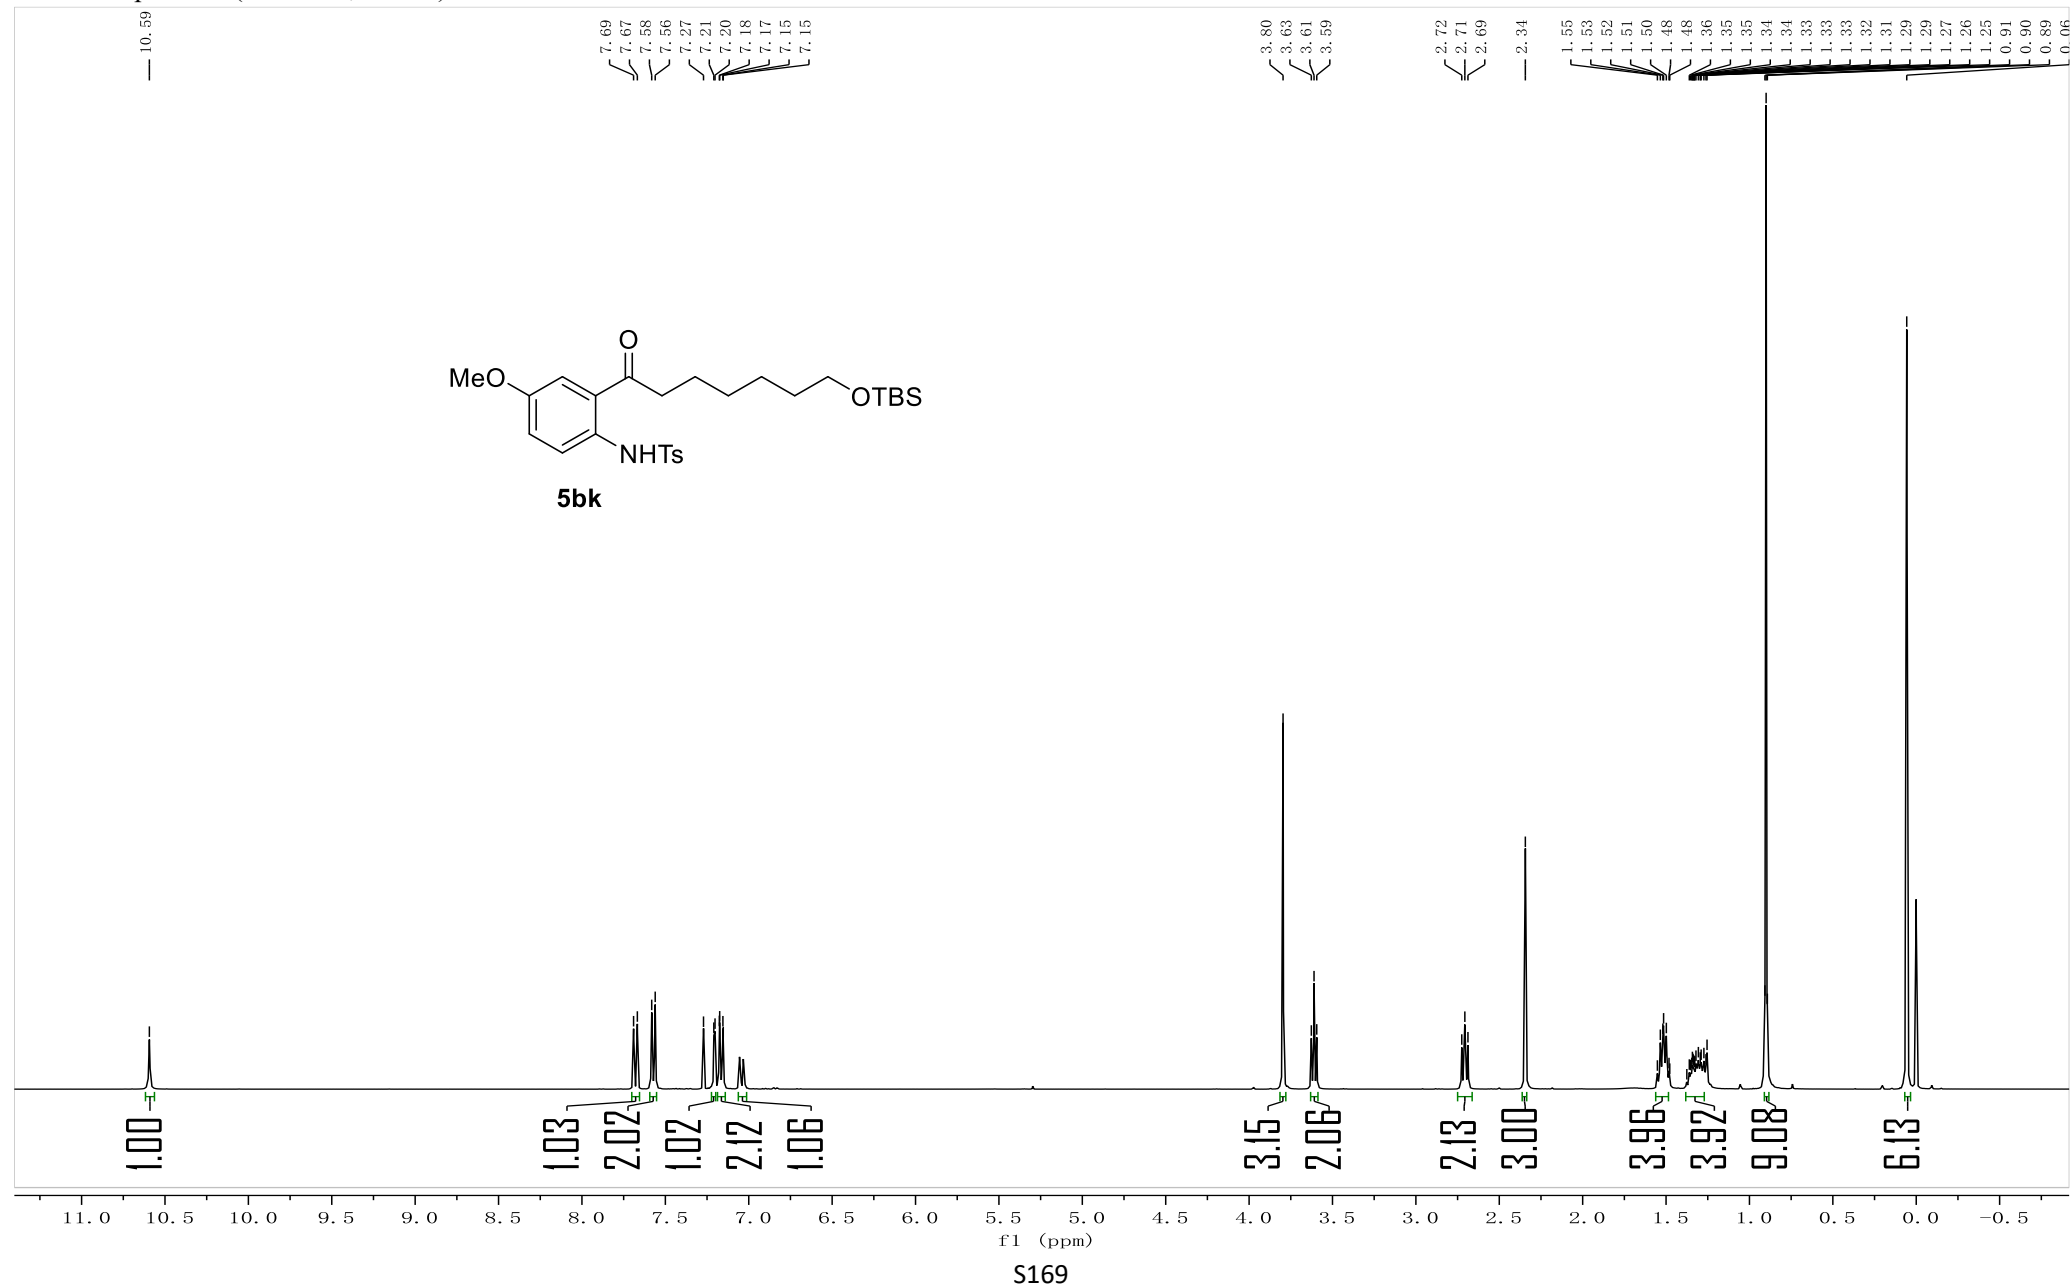

<sup>13</sup>C NMR-spectrum (101 MHz, CDCl<sub>3</sub>) of **5bk**

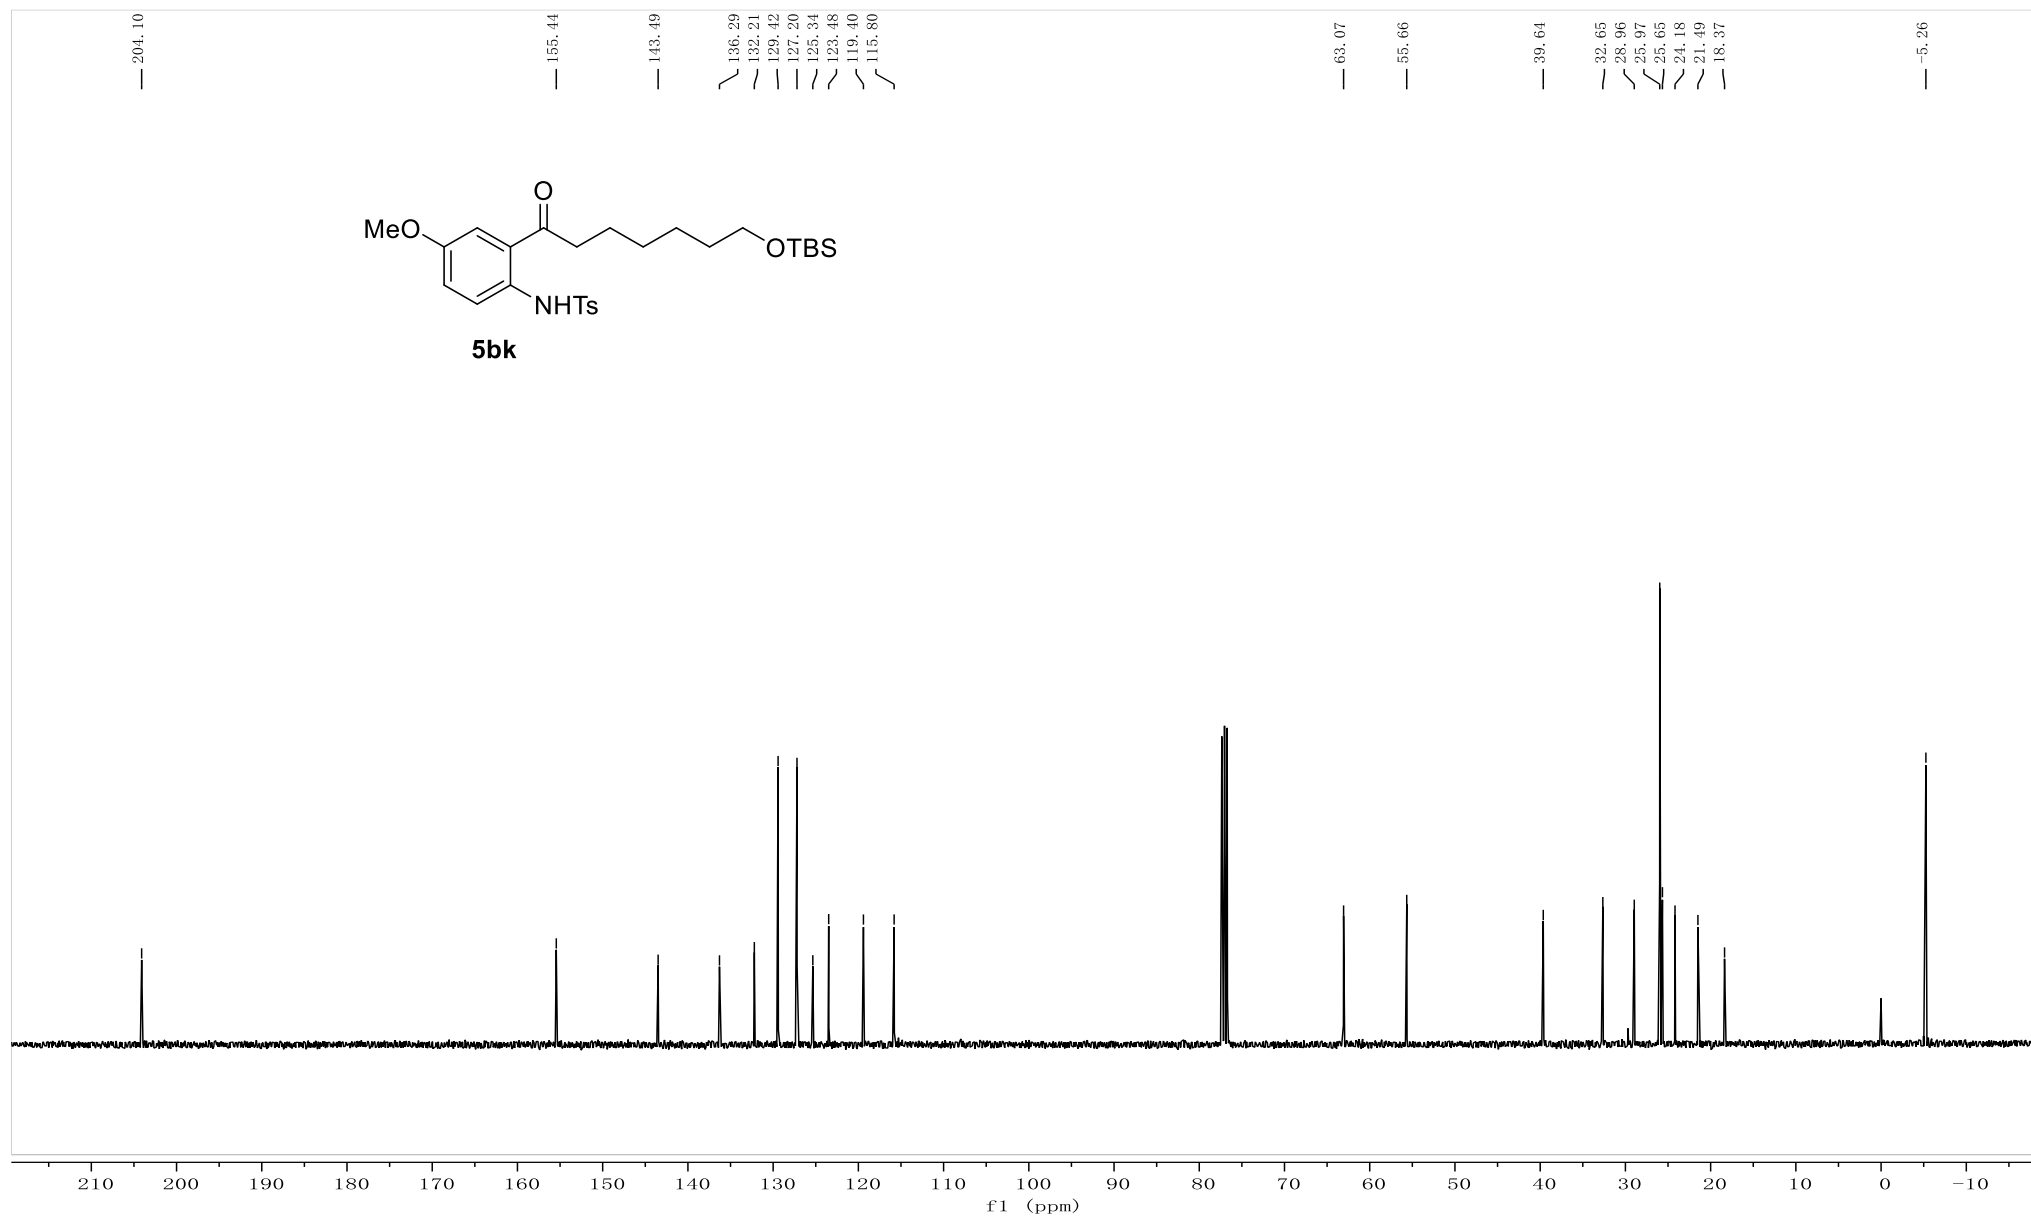

<sup>1</sup>H NMR-spectrum (400 MHz, CDCl<sub>3</sub>) of **5ck**

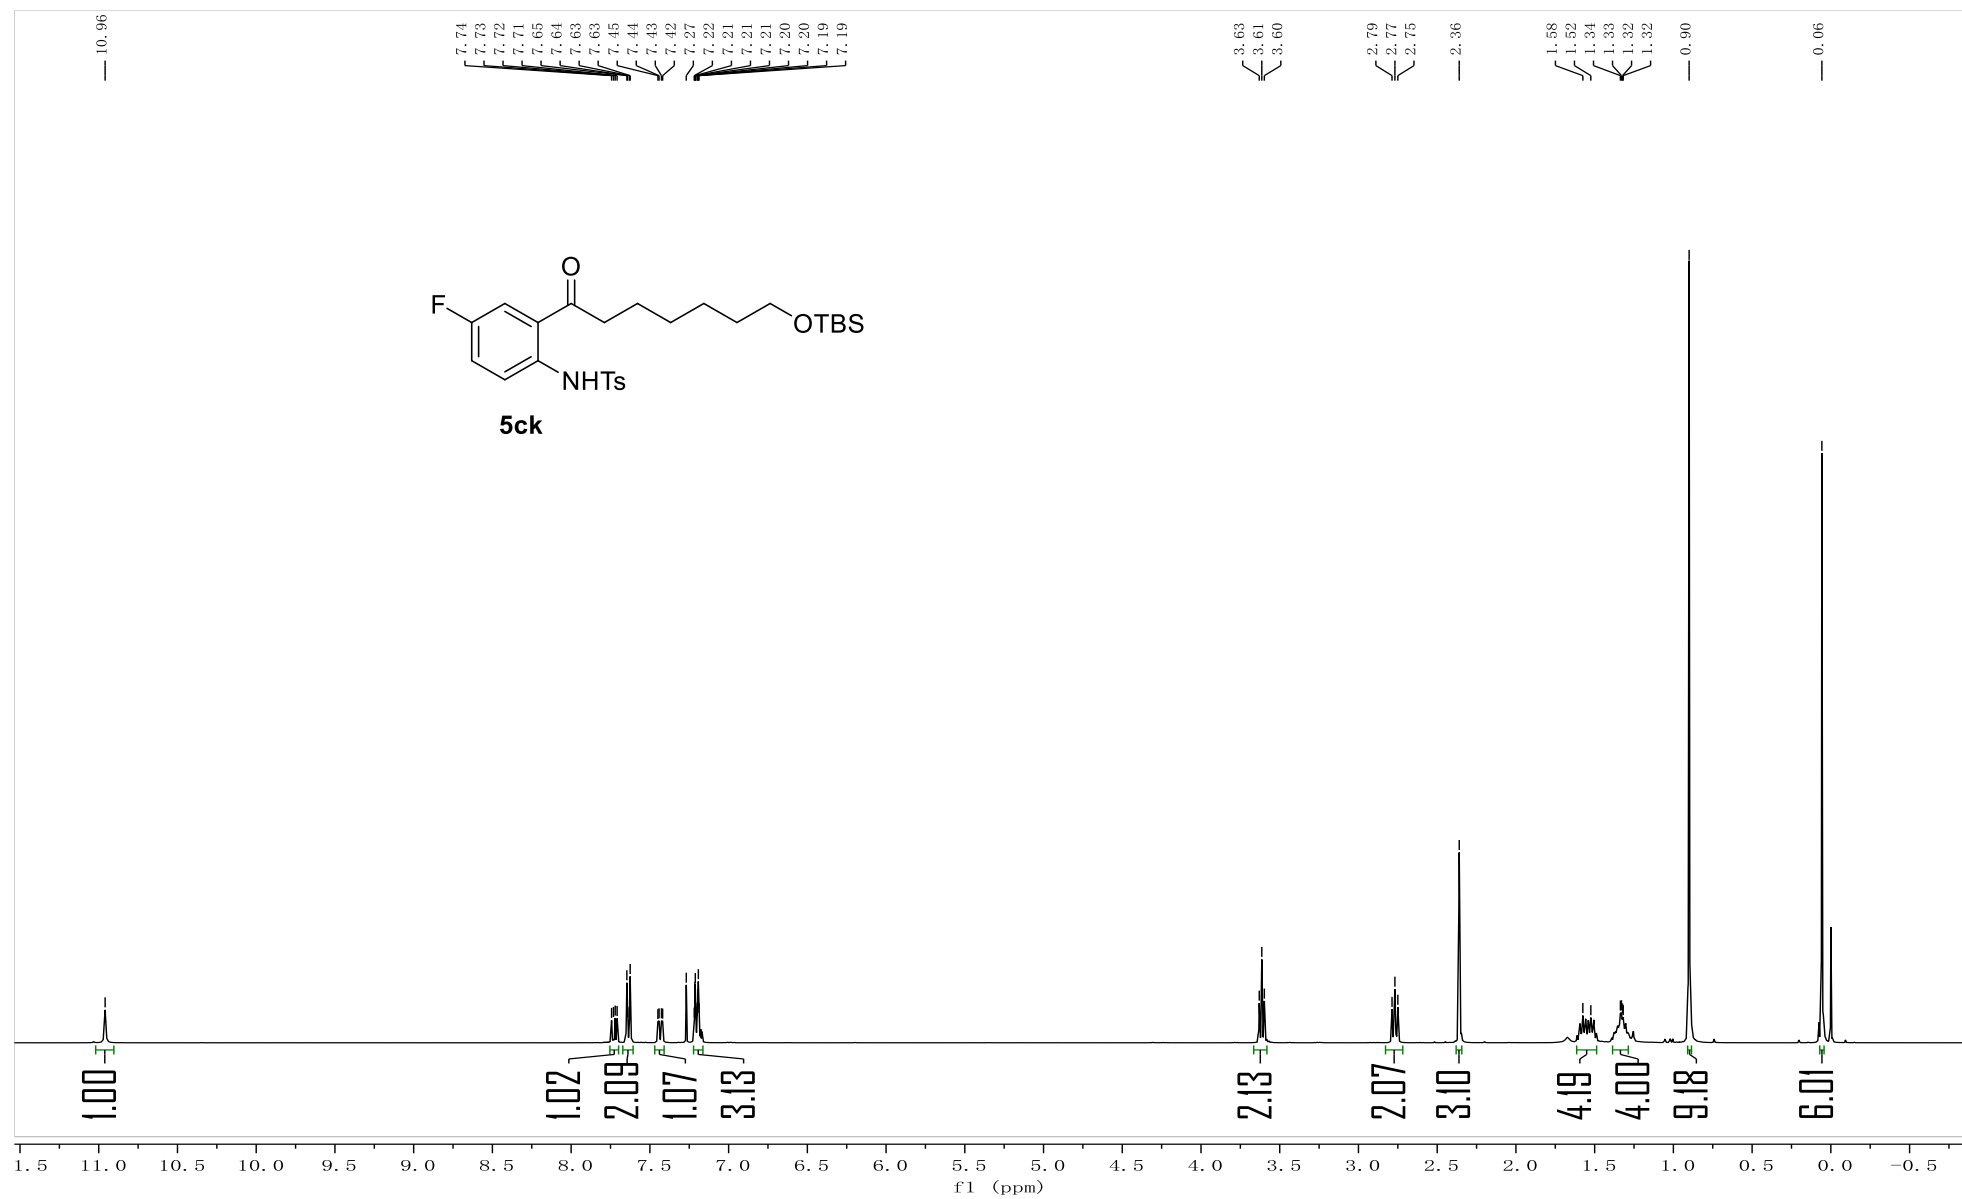

S171

$^{13}\text{C}$  NMR-spectrum (101 MHz,  $\text{CDCl}_3$ ) of **5ck**

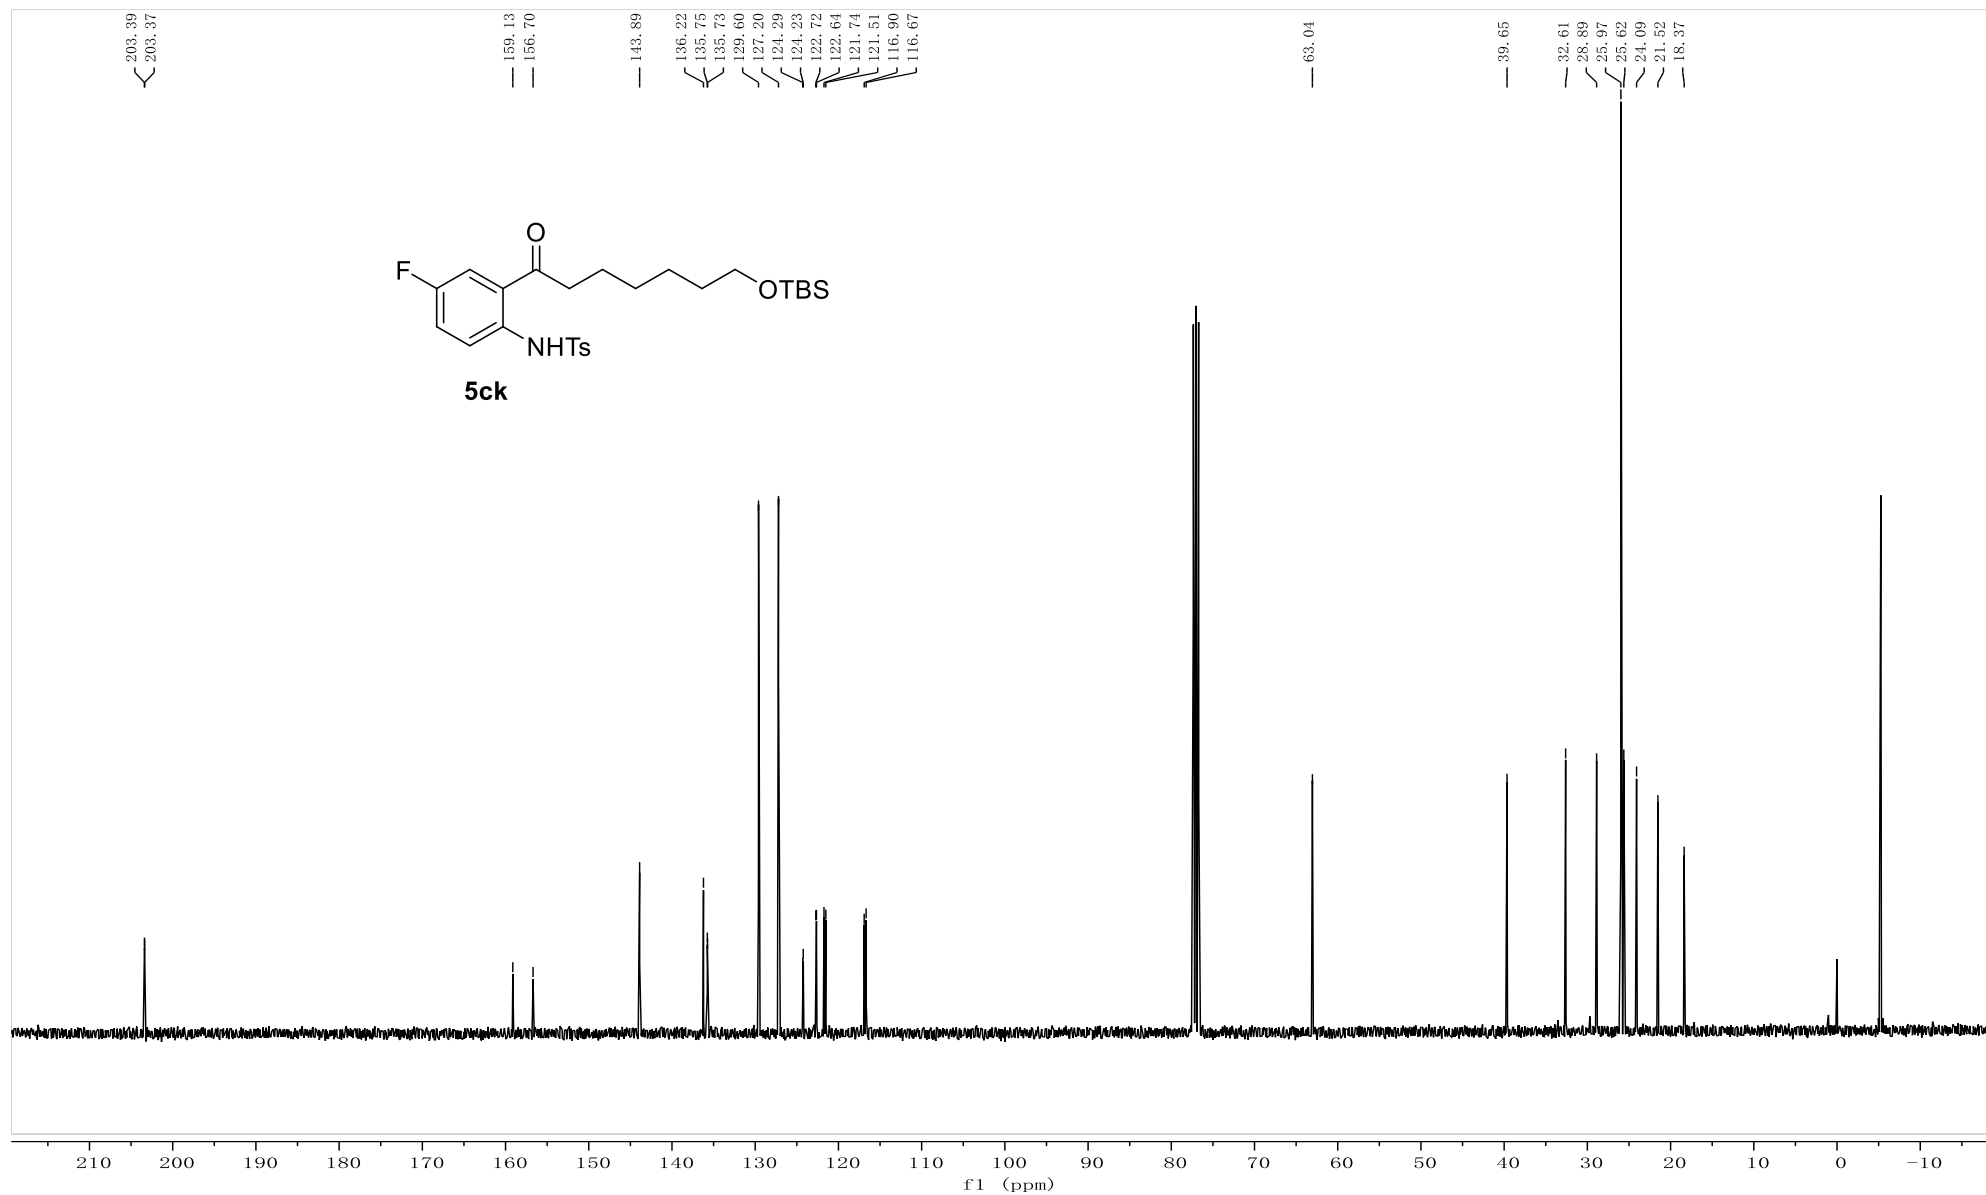



$^{19}\text{F}$  NMR-spectrum (376 MHz,  $\text{CDCl}_3$ ) of **5ck**

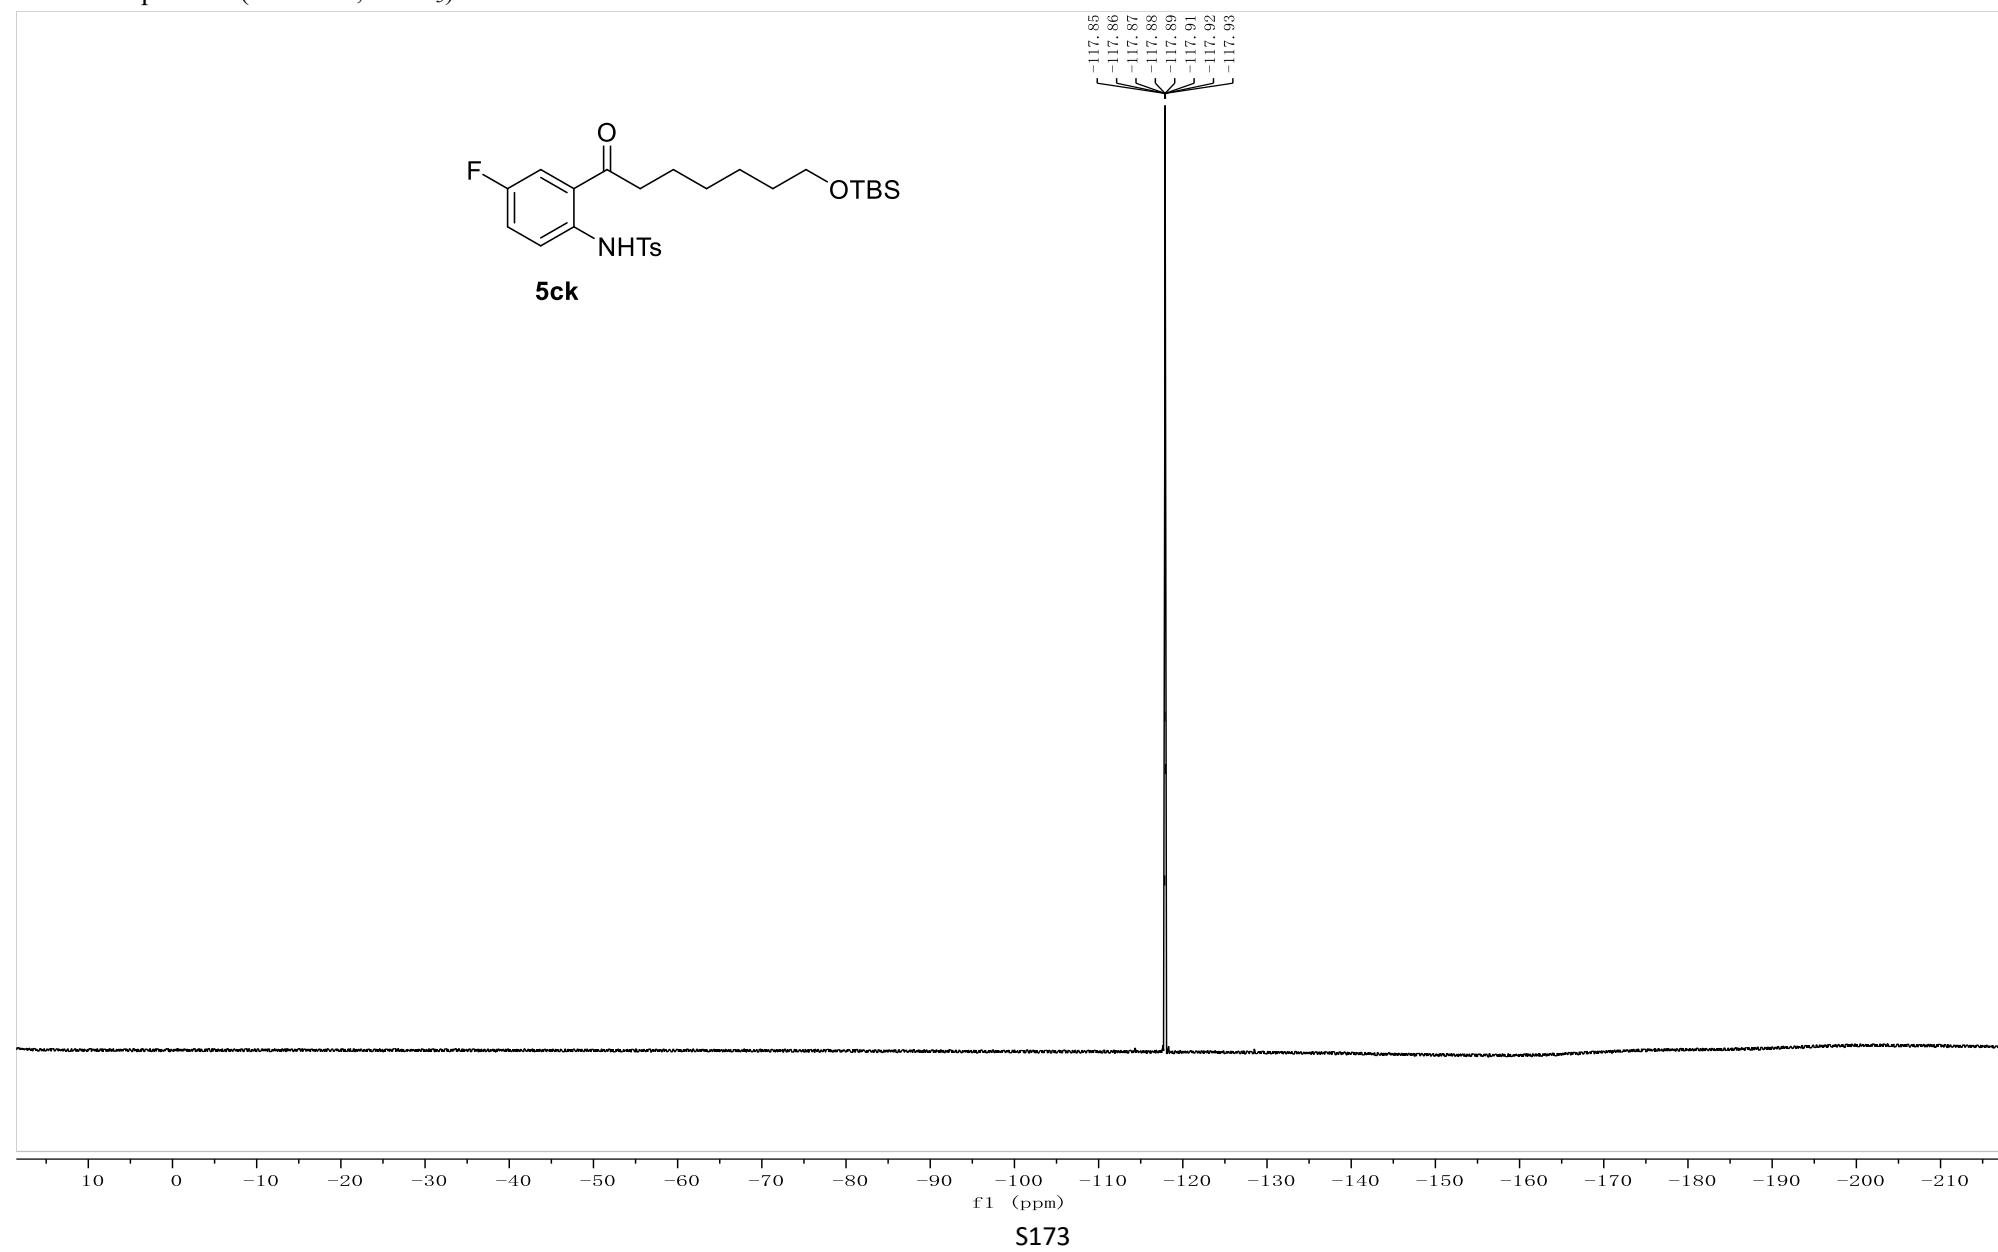

<sup>1</sup>H NMR-spectrum (400 MHz, CDCl<sub>3</sub>) of **5dk**

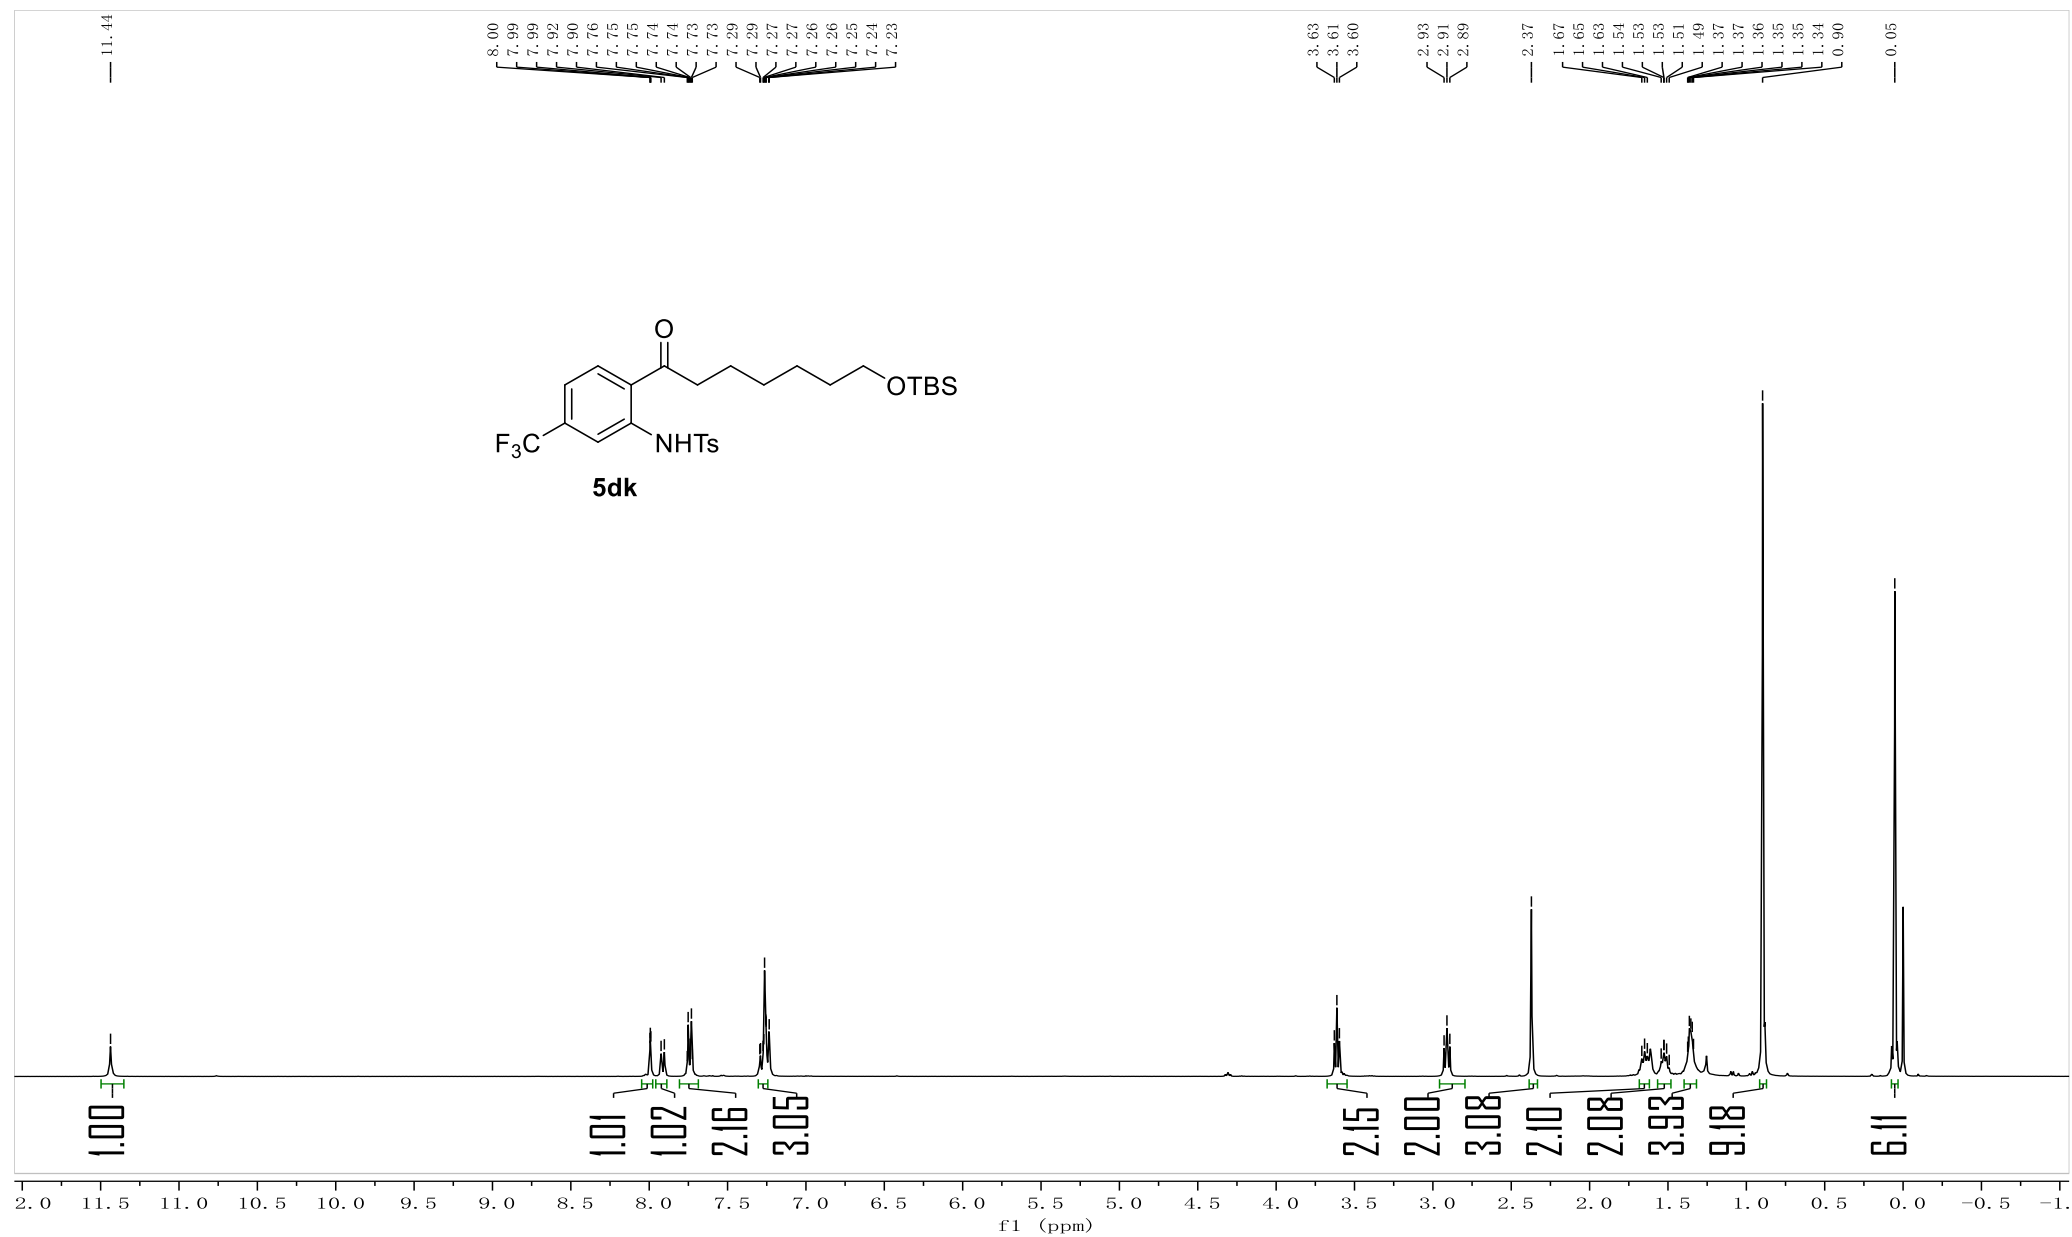

<sup>13</sup>C NMR-spectrum (101 MHz, CDCl<sub>3</sub>) of **5dk**

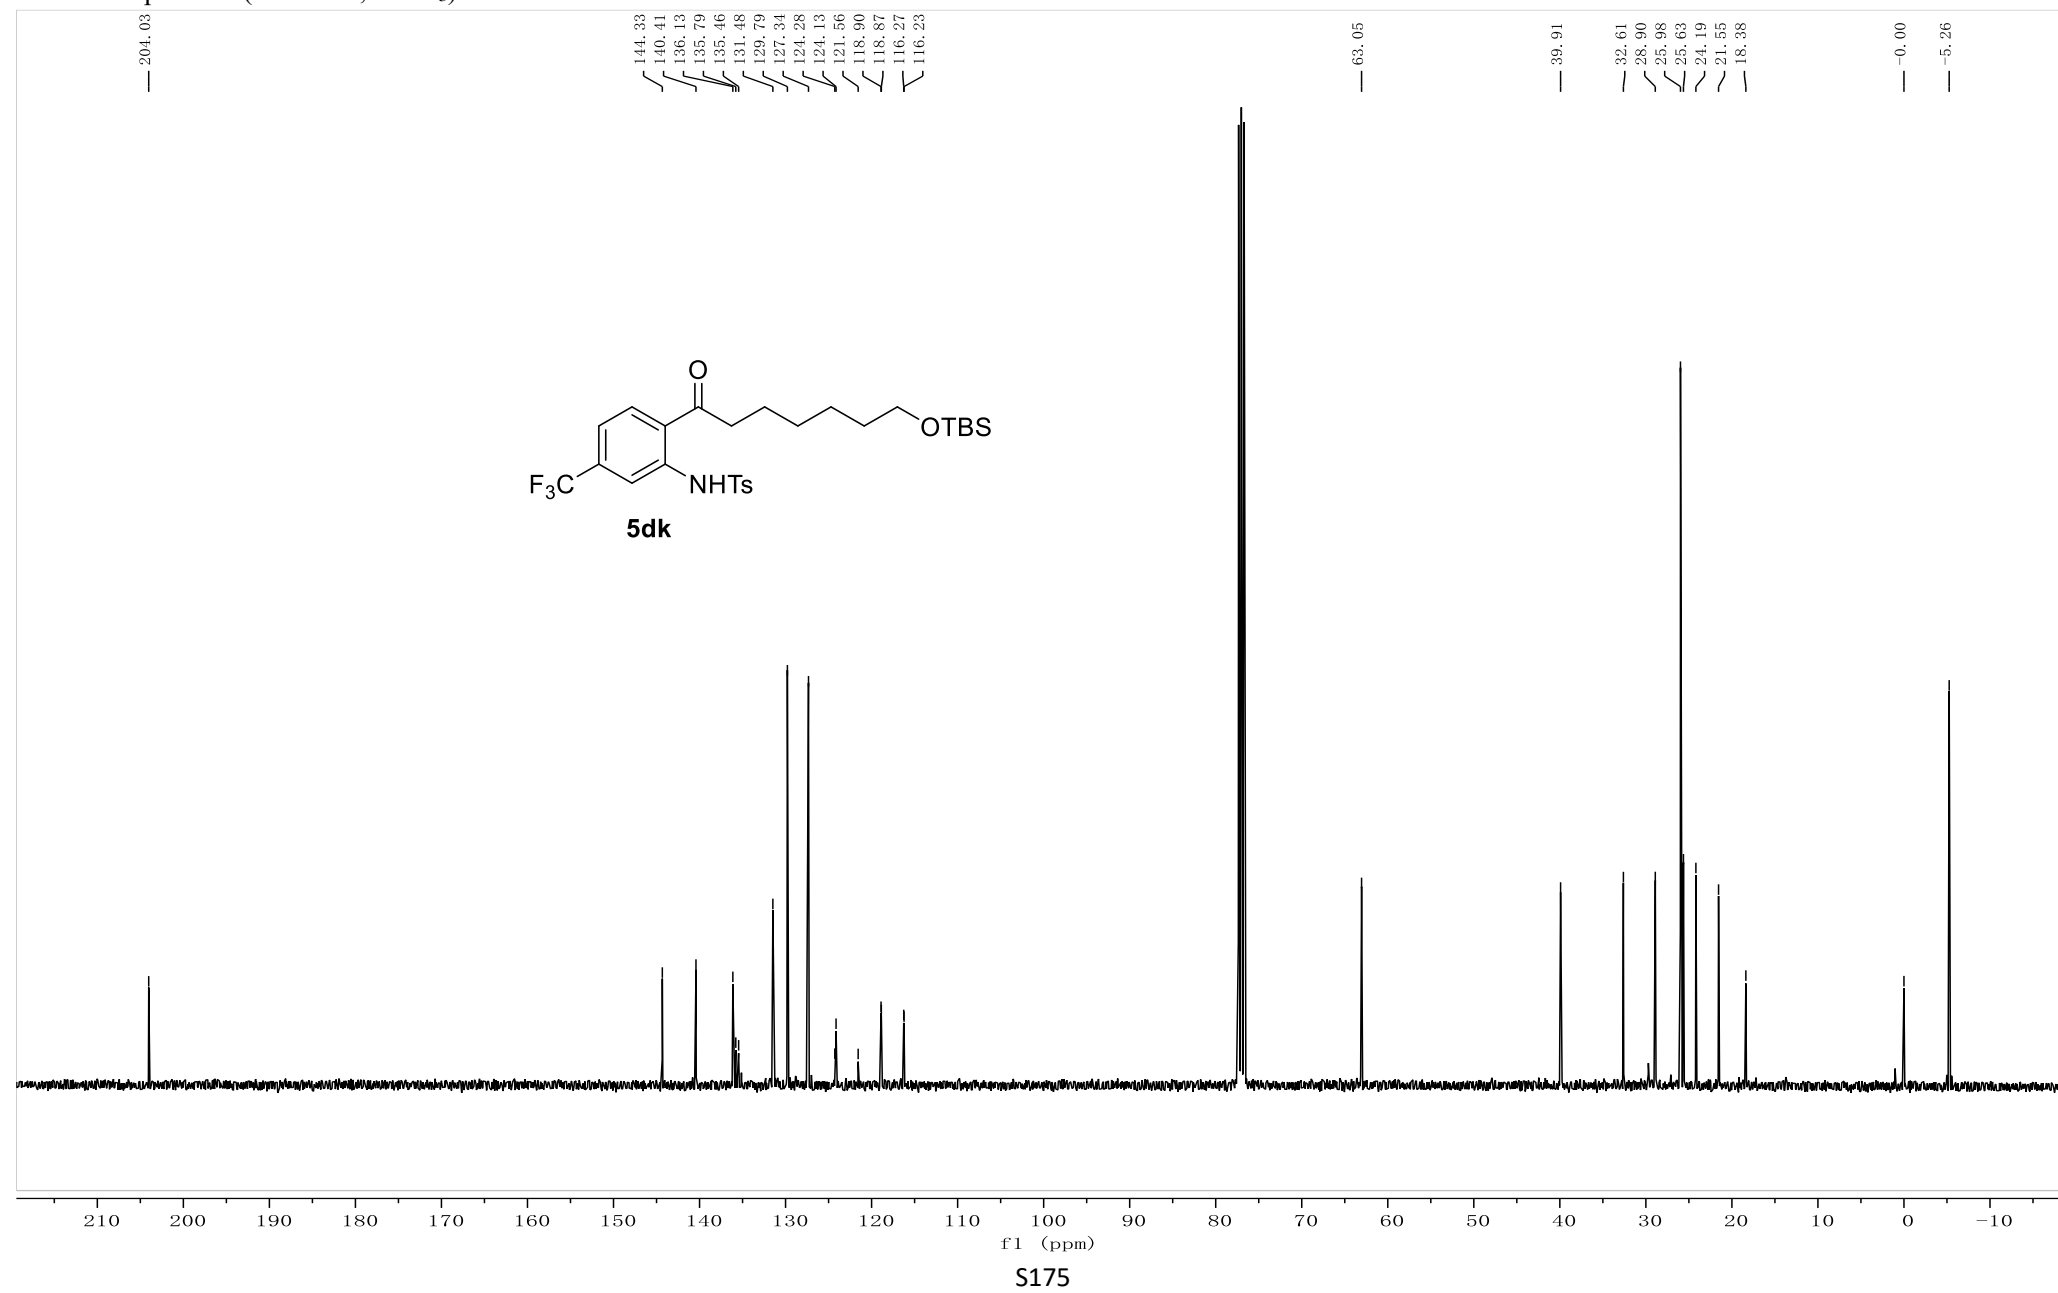

$^{19}\text{F}$  NMR-spectrum (376 MHz,  $\text{CDCl}_3$ ) of **5dk**

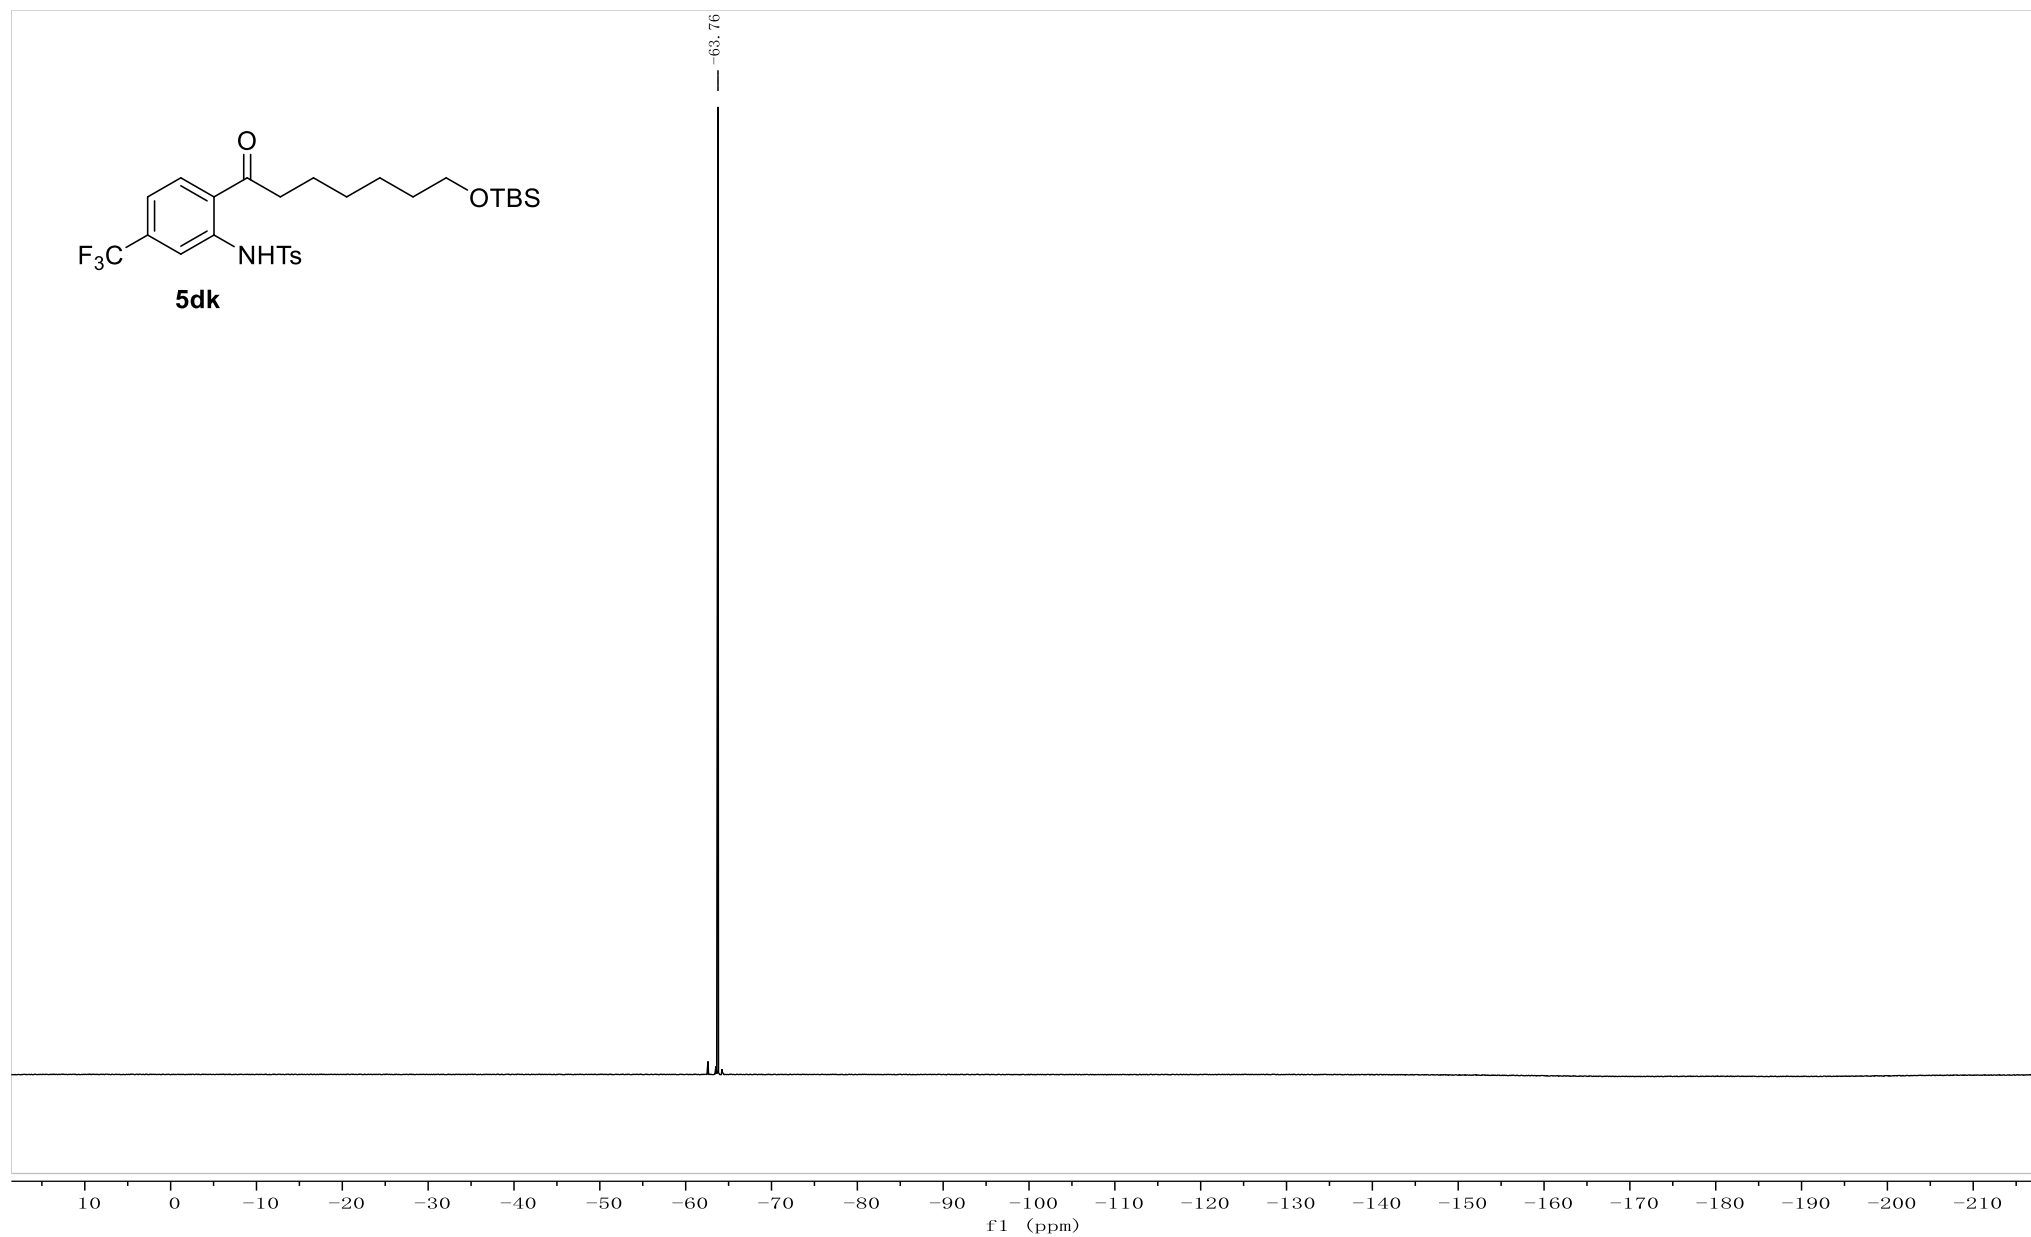

<sup>1</sup>H NMR-spectrum (400 MHz, CDCl<sub>3</sub>) of **6**

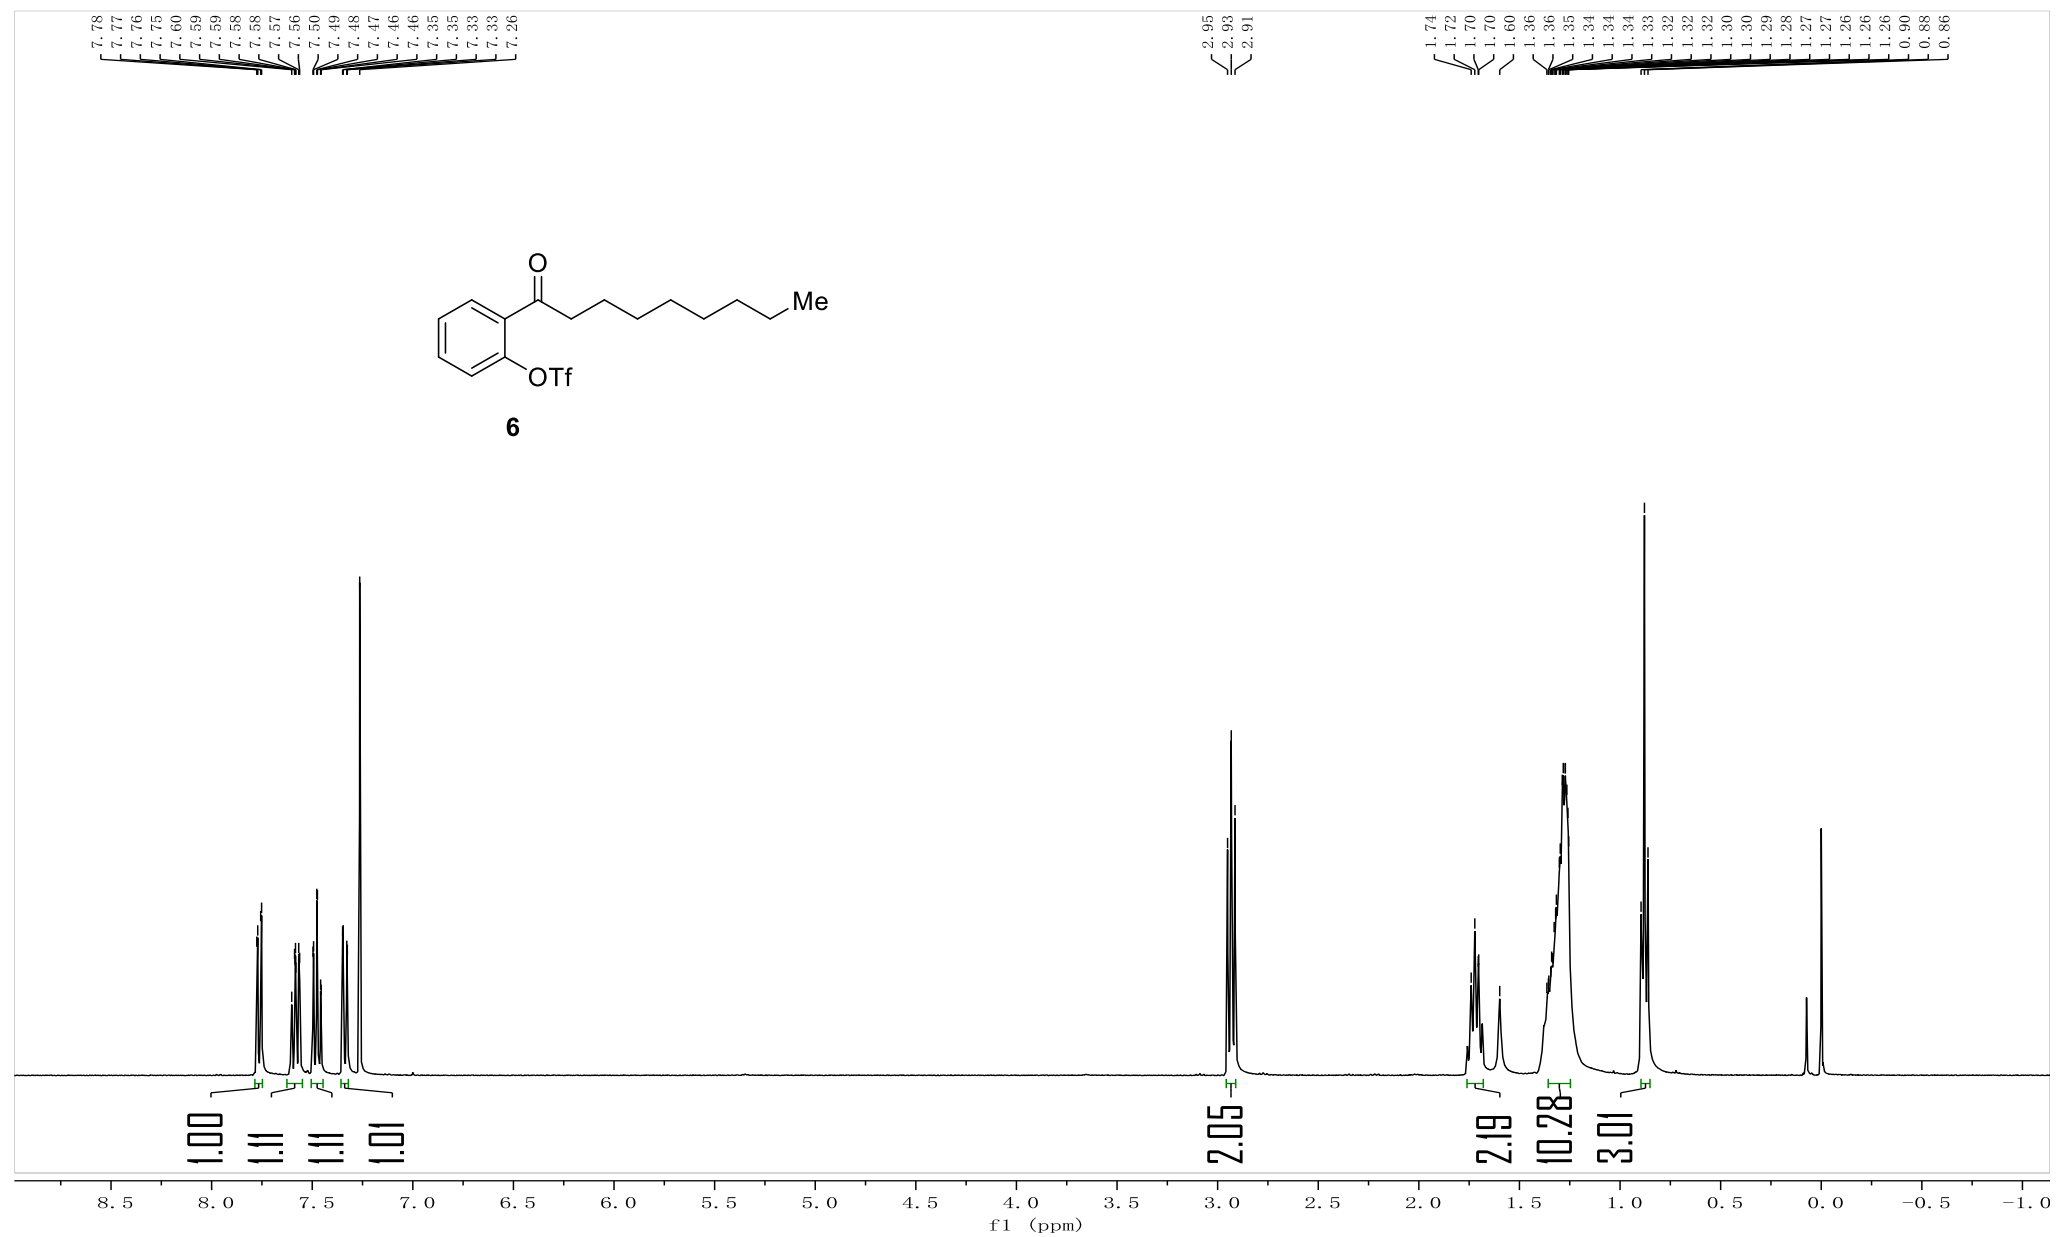

<sup>13</sup>C NMR-spectrum (101 MHz, CDCl<sub>3</sub>) of **6**

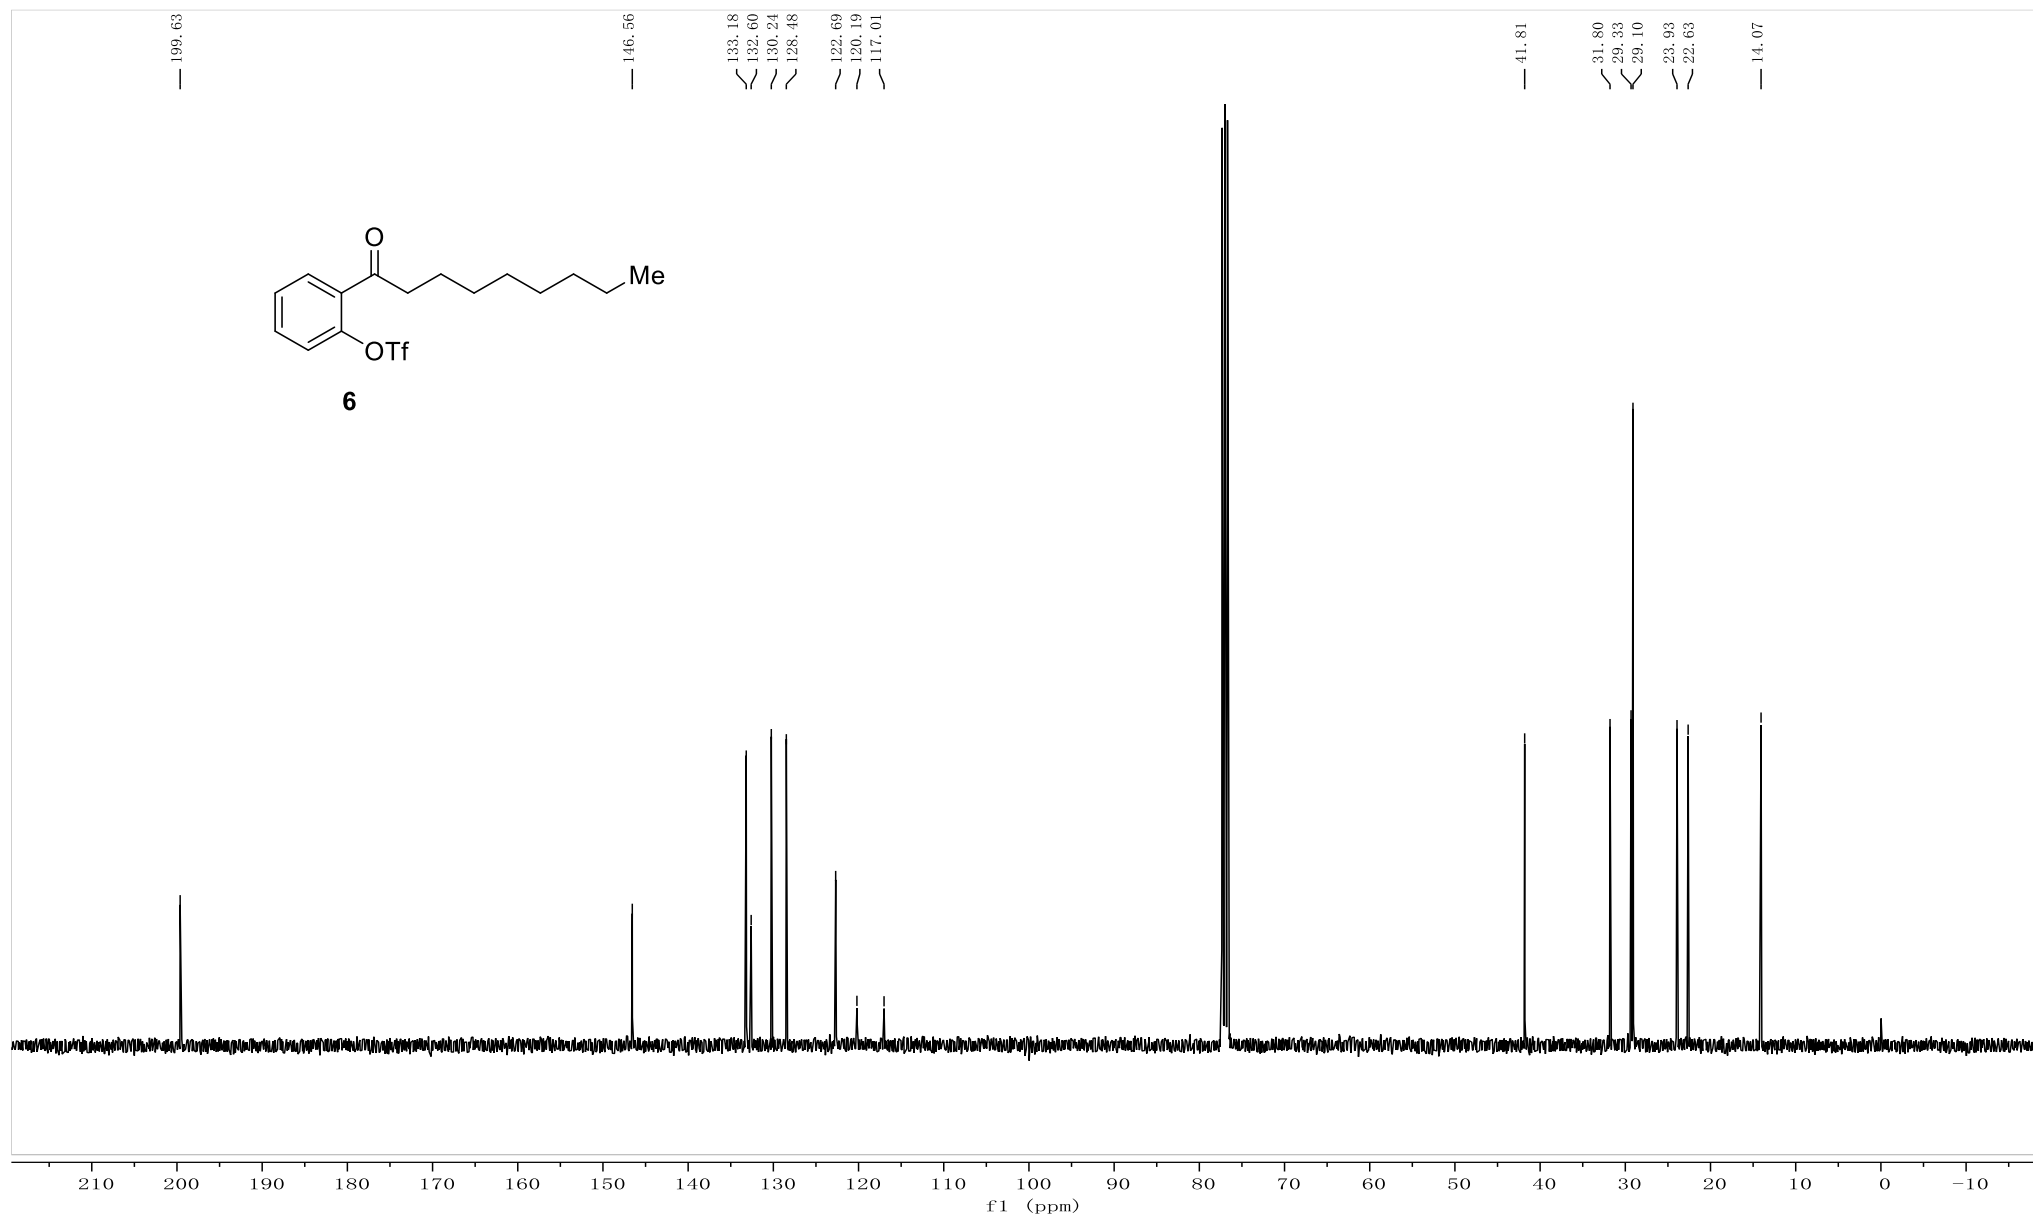

$^{19}\text{F}$  NMR-spectrum (376 MHz,  $\text{CDCl}_3$ ) of **6**

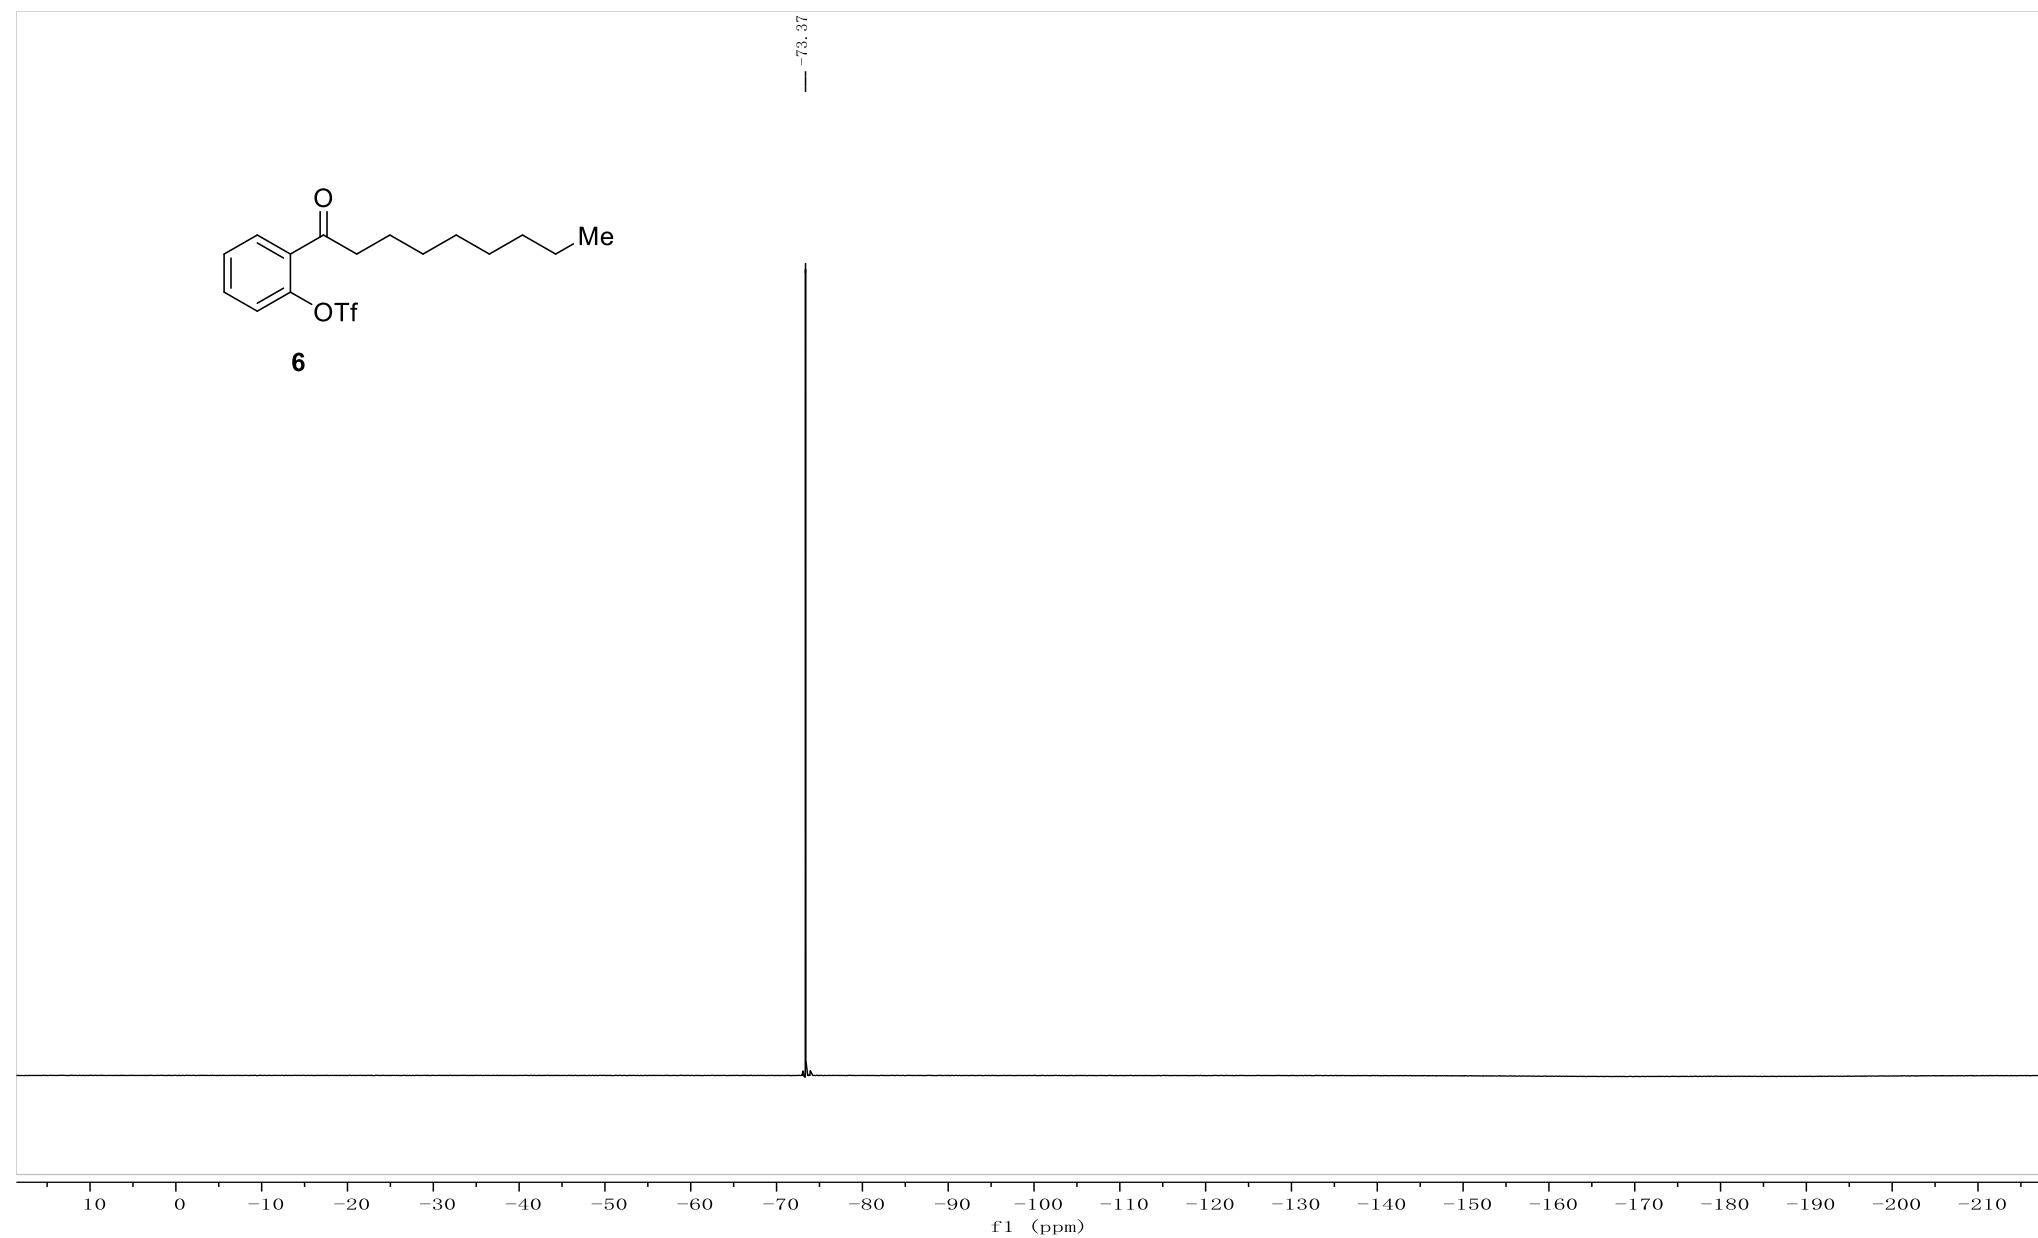

<sup>1</sup>H NMR-spectrum (400 MHz, CDCl<sub>3</sub>) of **7**

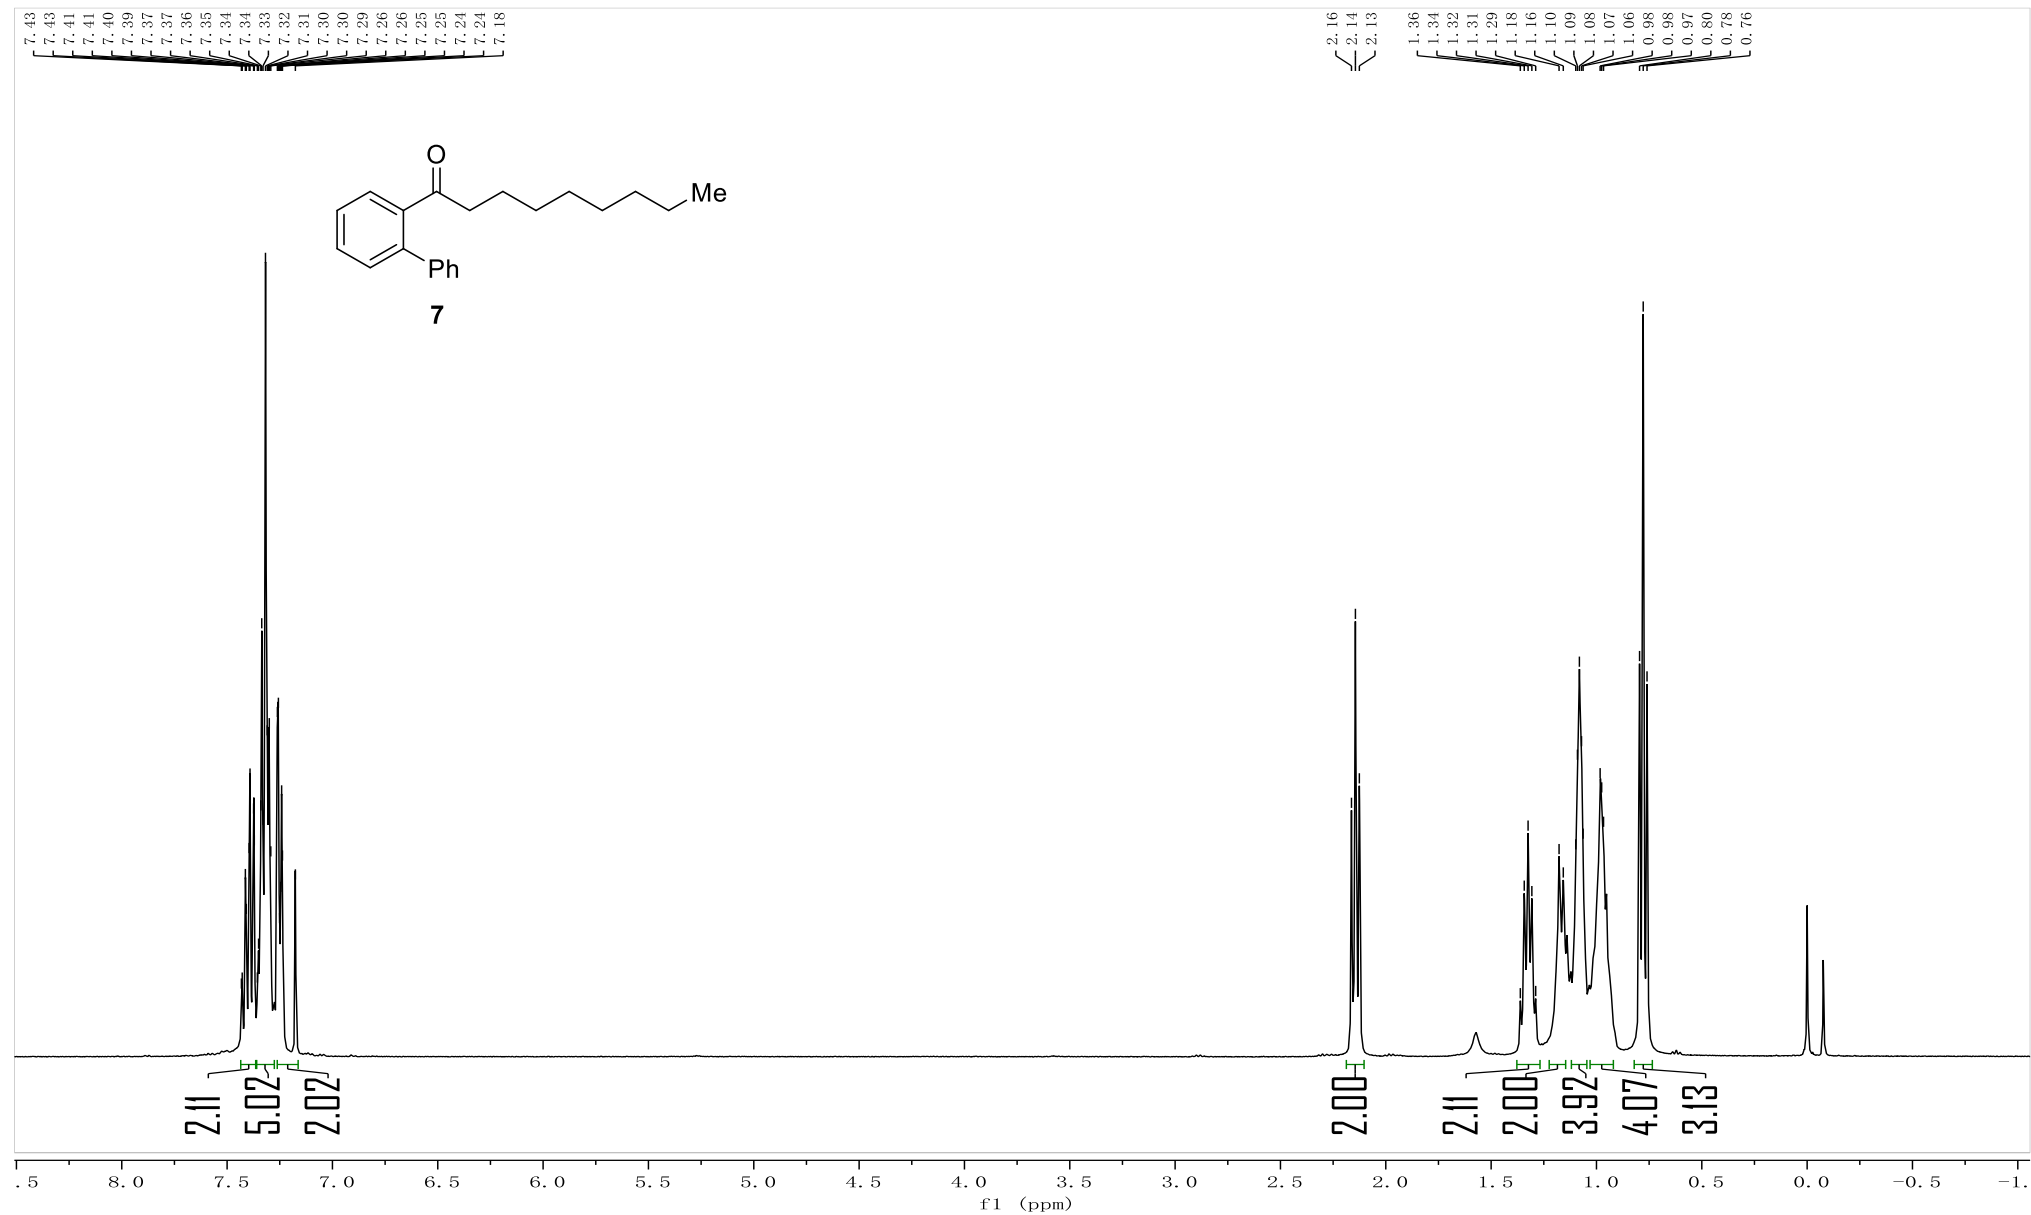



$^{13}\text{C}$  NMR-spectrum (126 MHz,  $\text{CDCl}_3$ ) of **7**

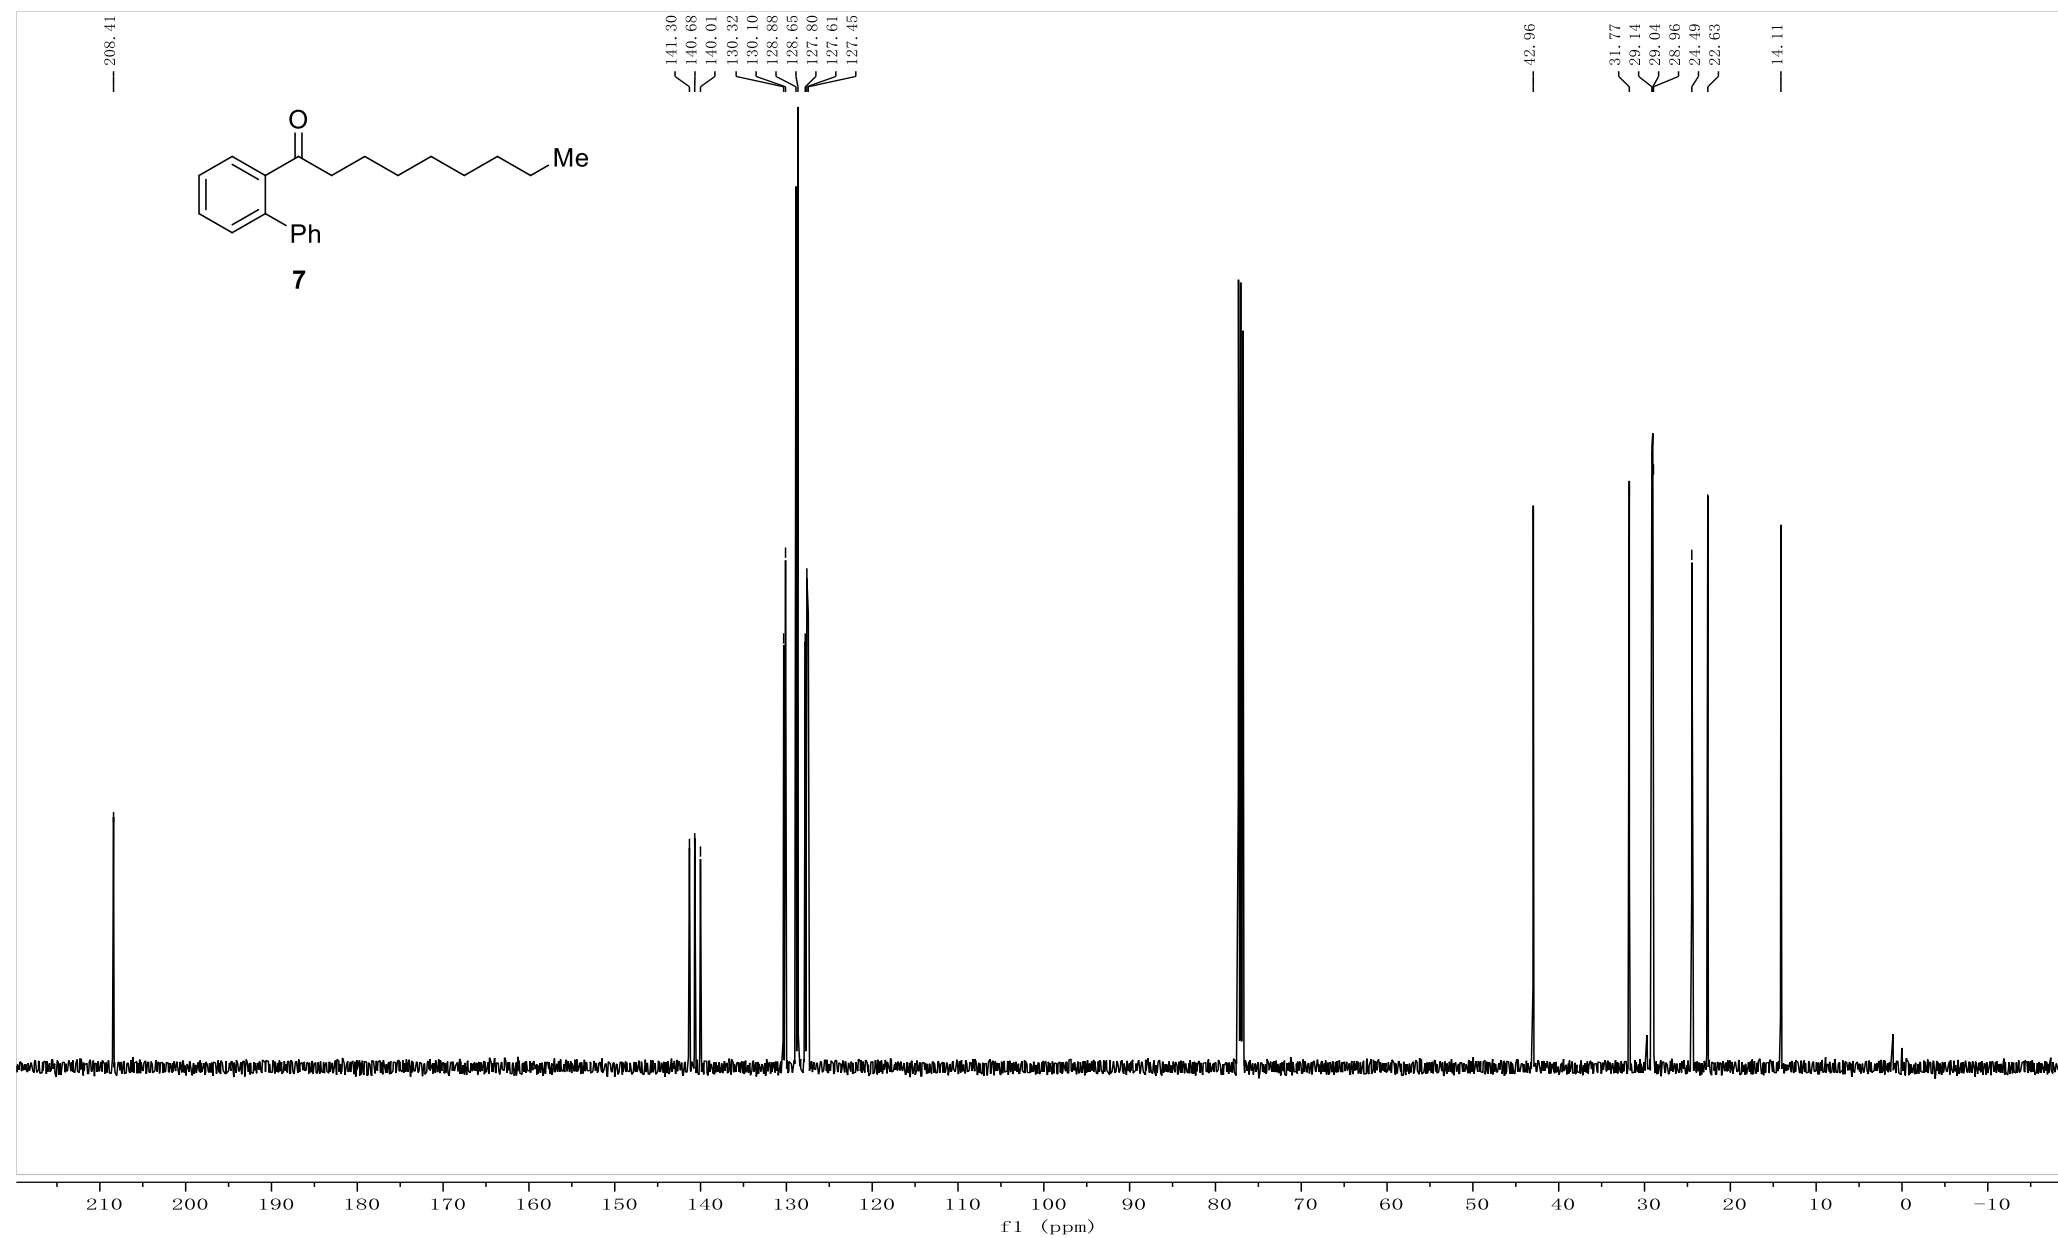

S181

<sup>1</sup>H NMR-spectrum (500 MHz, CDCl<sub>3</sub>) of **9**

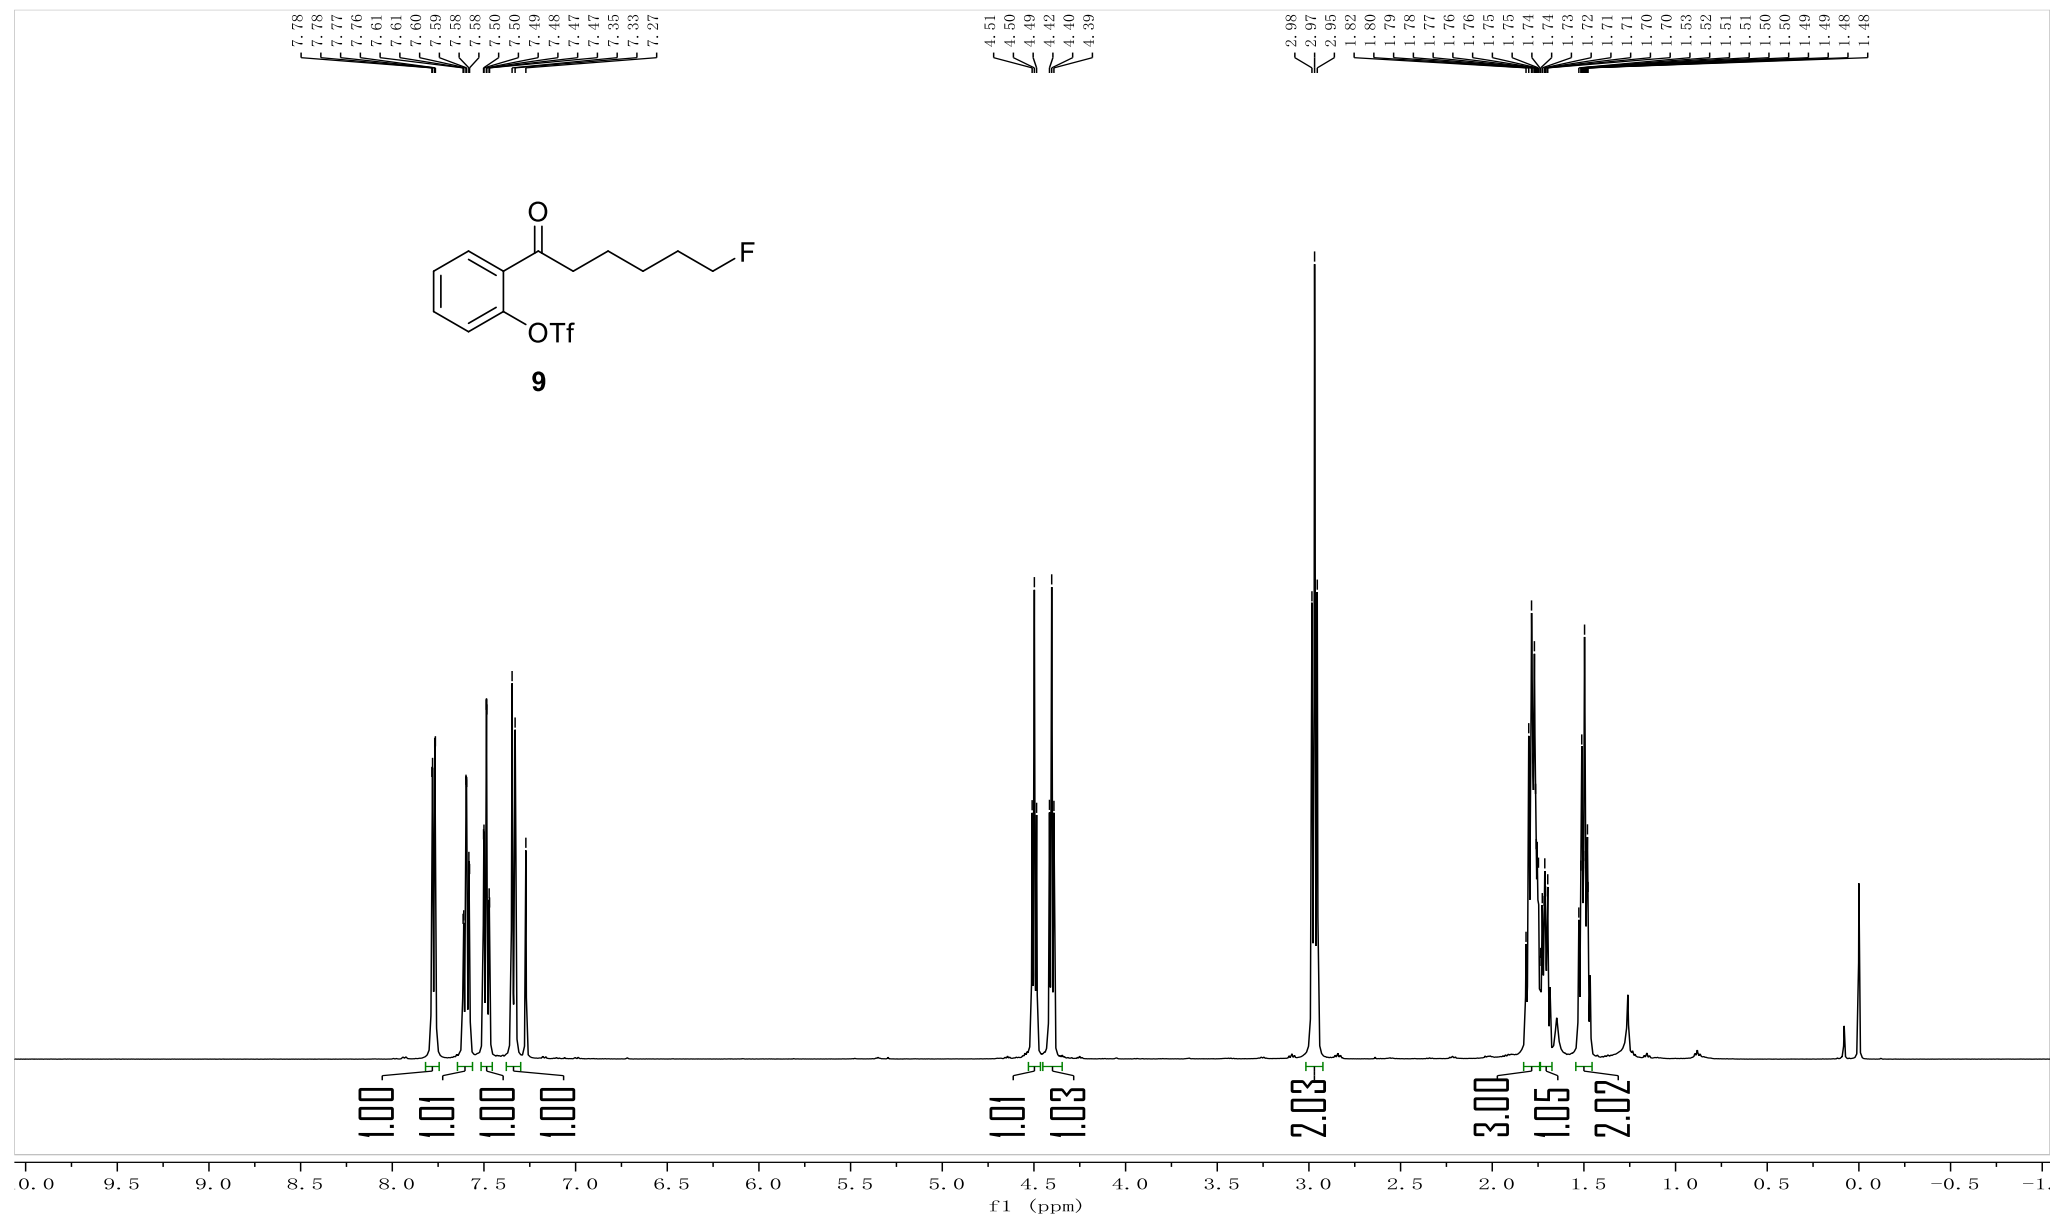

S182

<sup>13</sup>C NMR-spectrum (126 MHz, CDCl<sub>3</sub>) of **9**

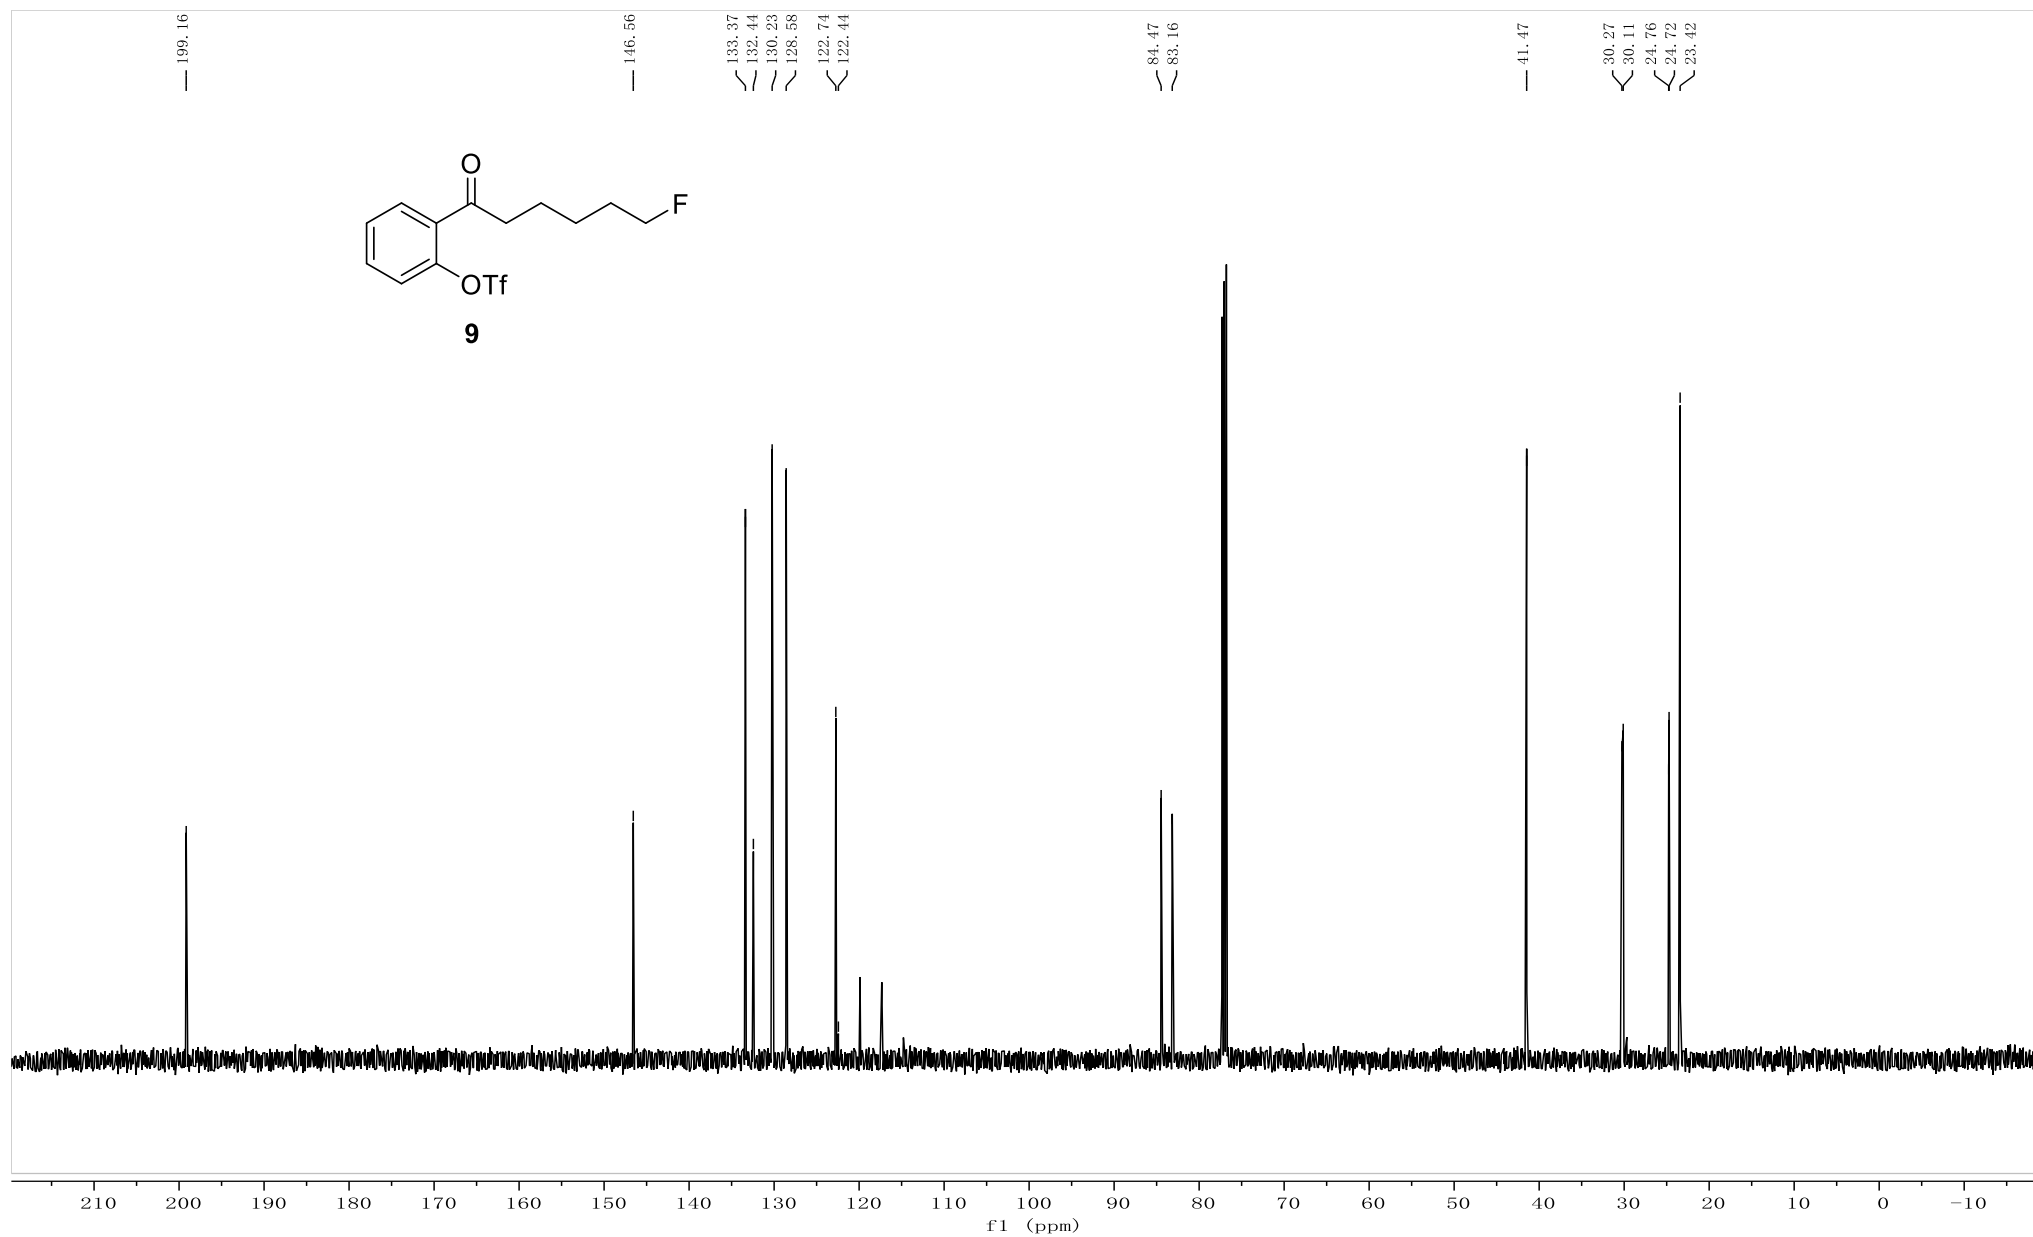

S183

$^{19}\text{F}$  NMR-spectrum (471 MHz,  $\text{CDCl}_3$ ) of **9**

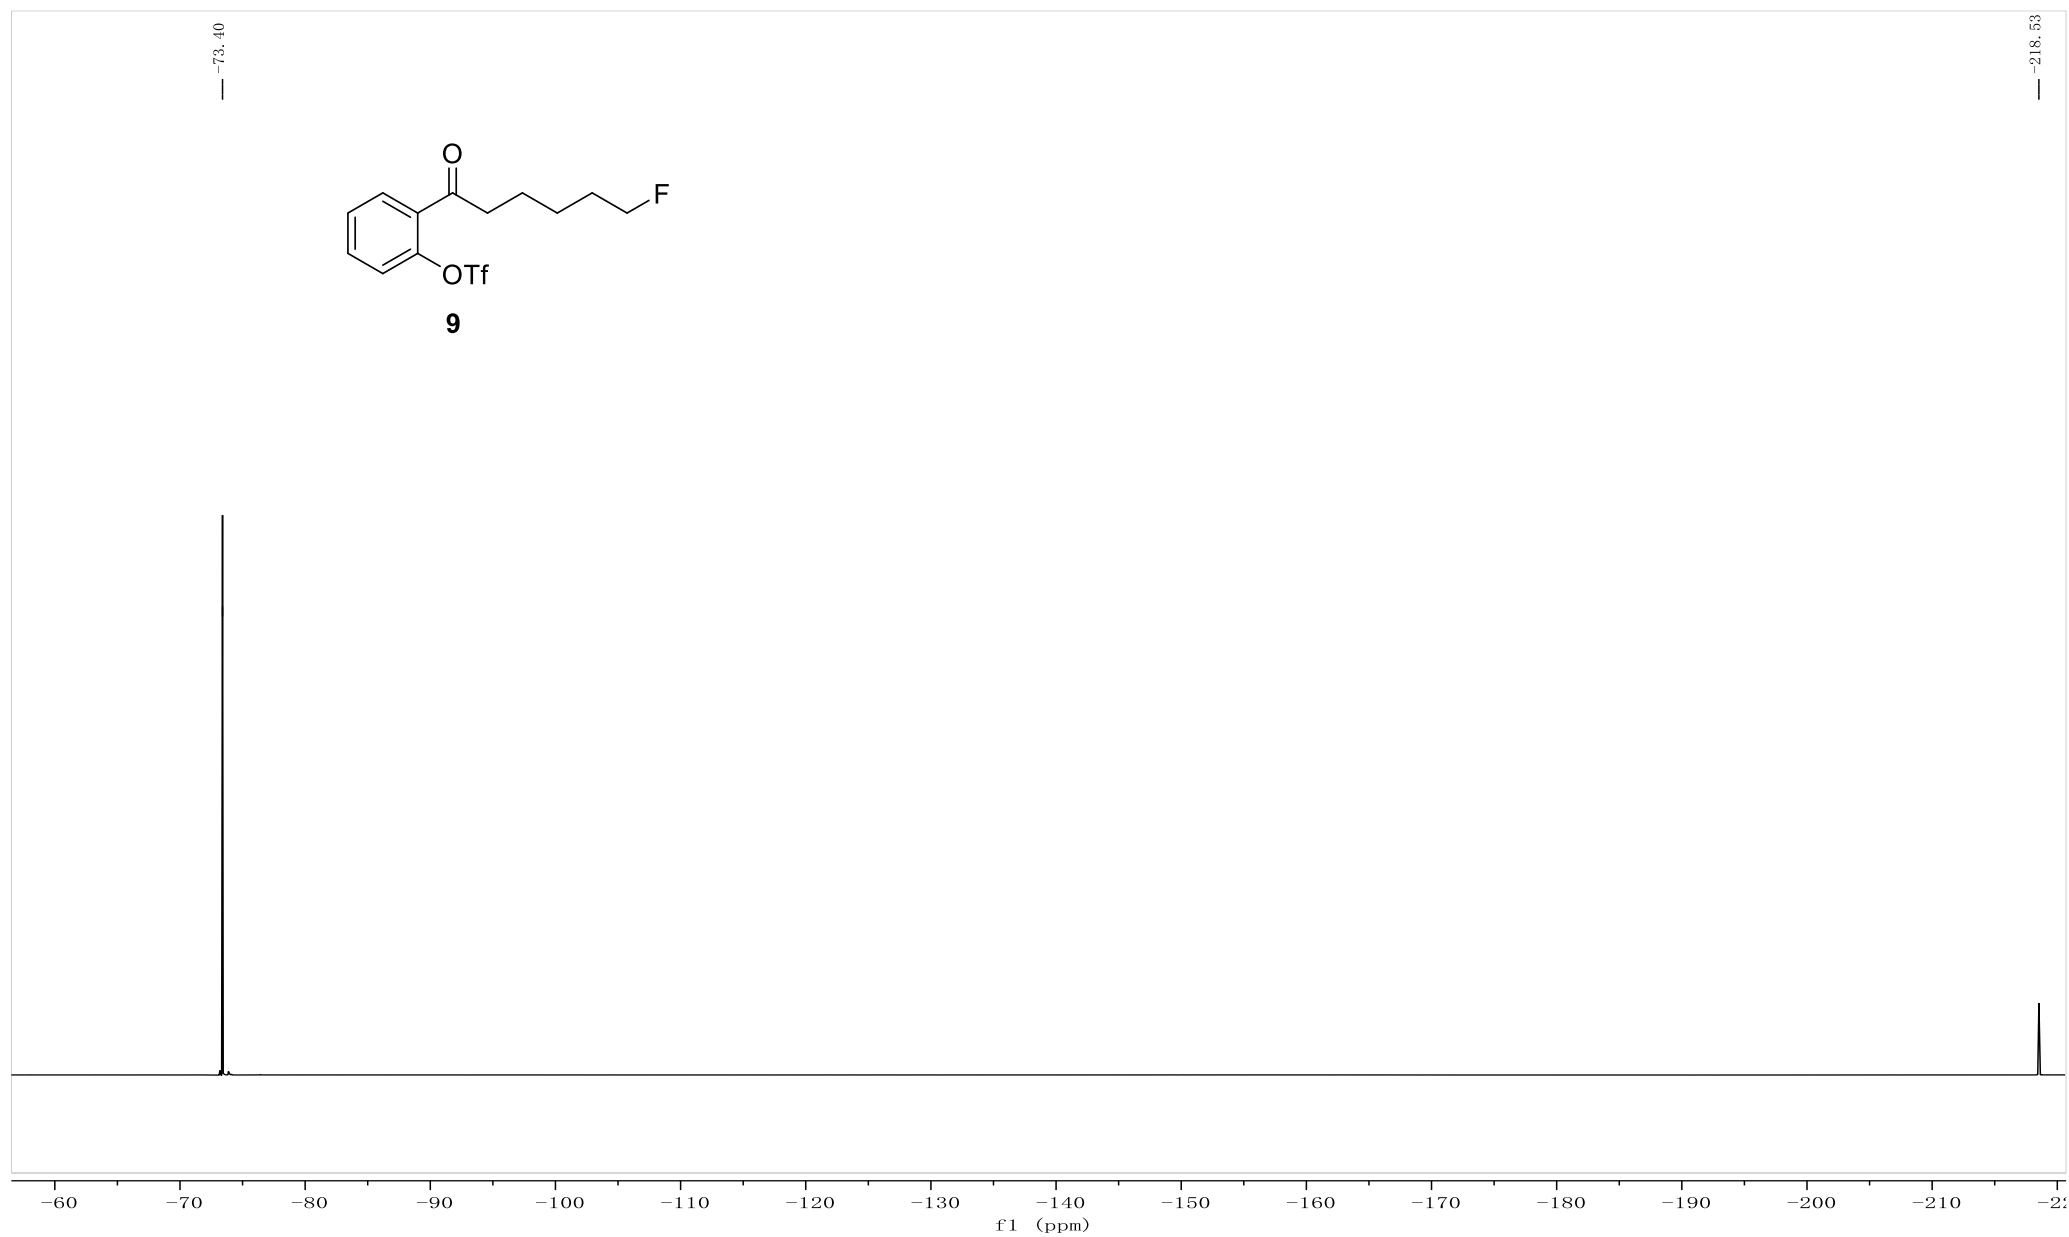

<sup>1</sup>H NMR-spectrum (400 MHz, CDCl<sub>3</sub>) of **10**

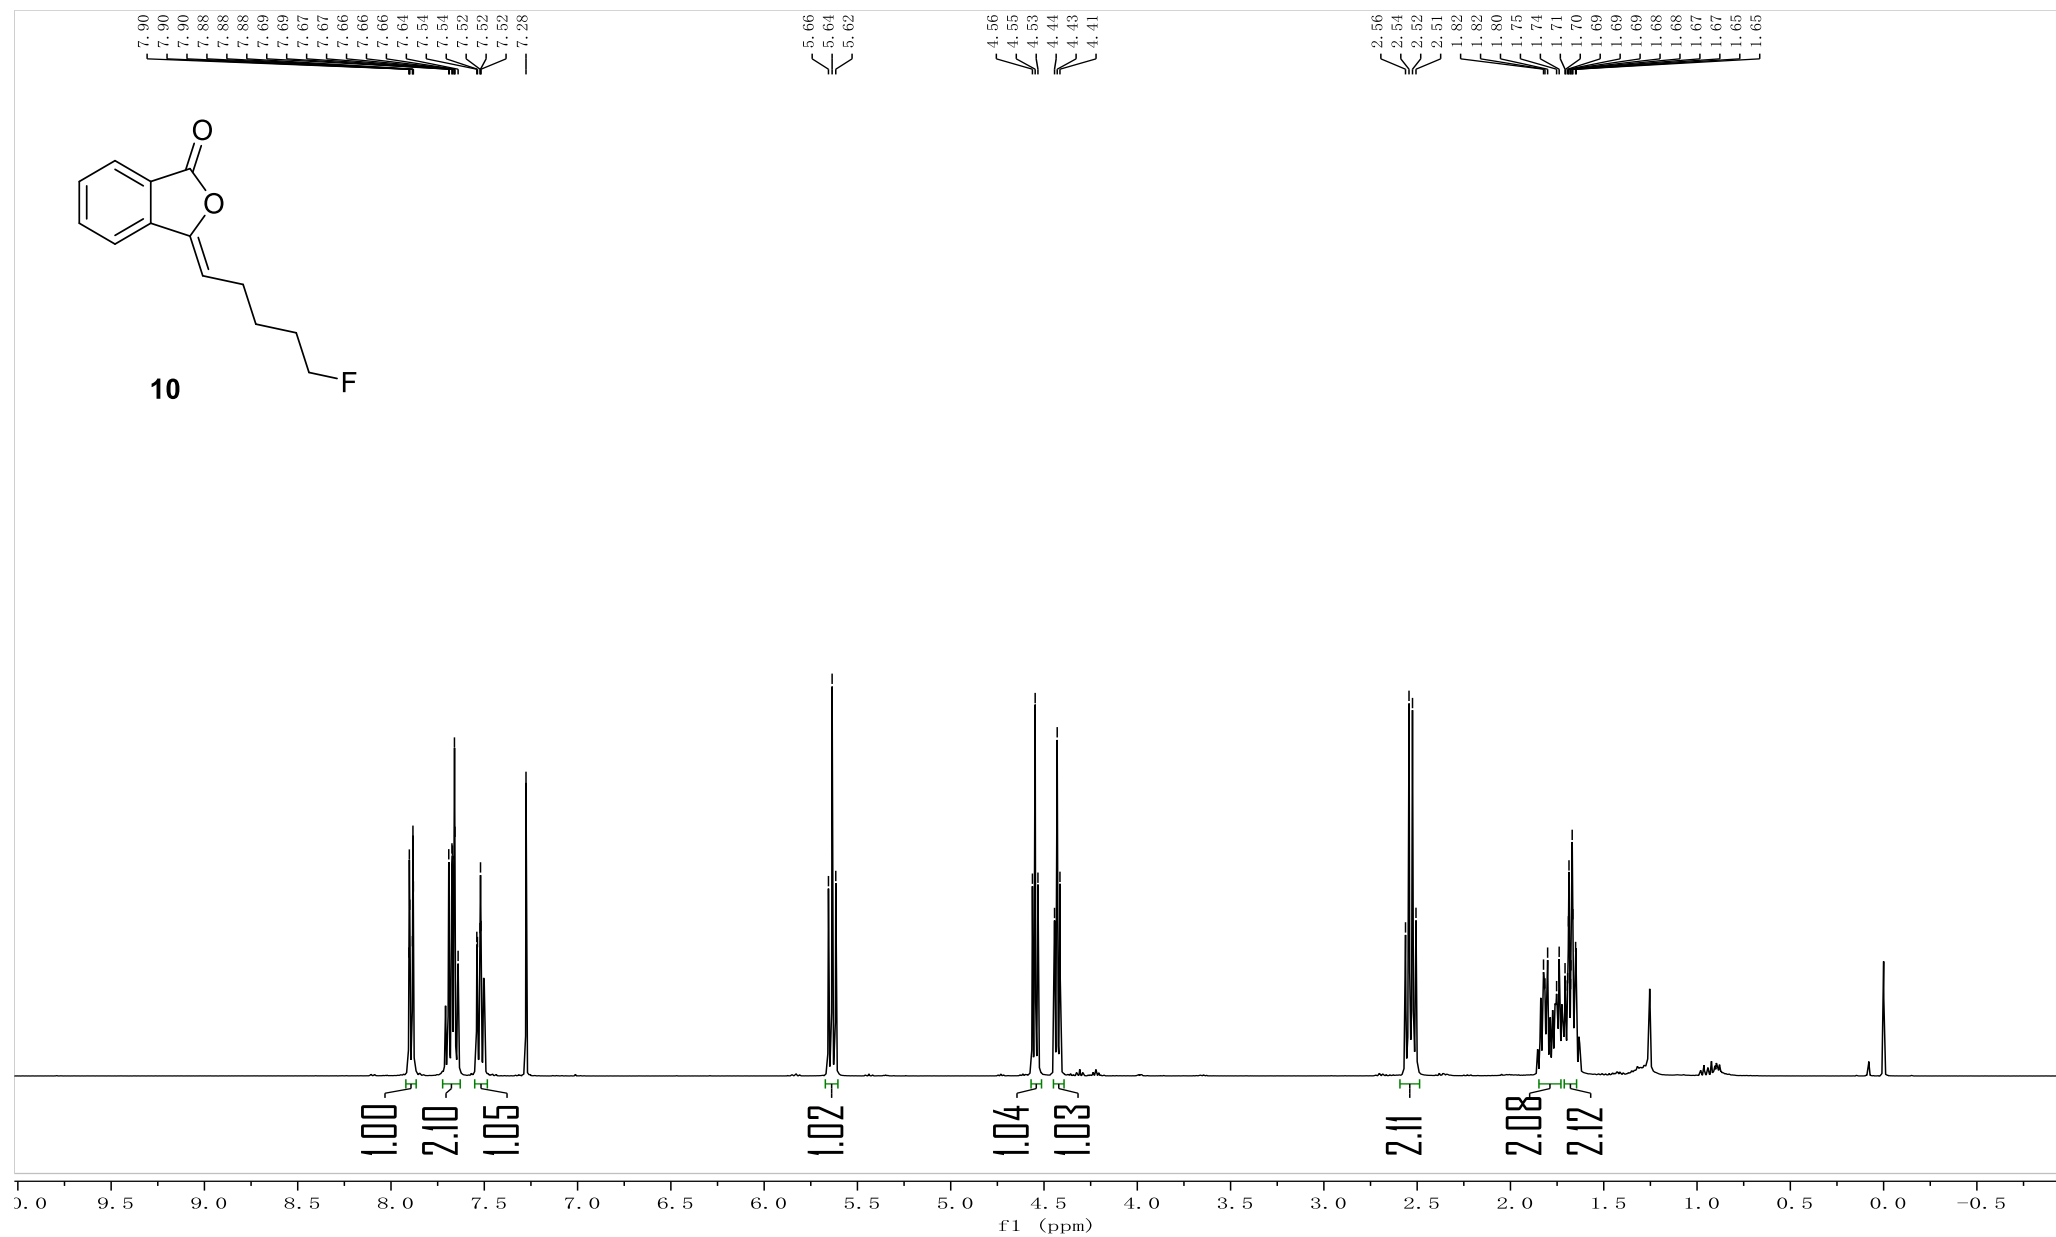

S185

CCCCC=C1OC(=O)c2ccccc12

10

167.11, 146.03, 139.41, 134.34, 129.53, 125.29, 124.44, 119.71, 108.67, 84.57, 82.91, 30.09, 29.89, 25.34, 24.97, 24.92

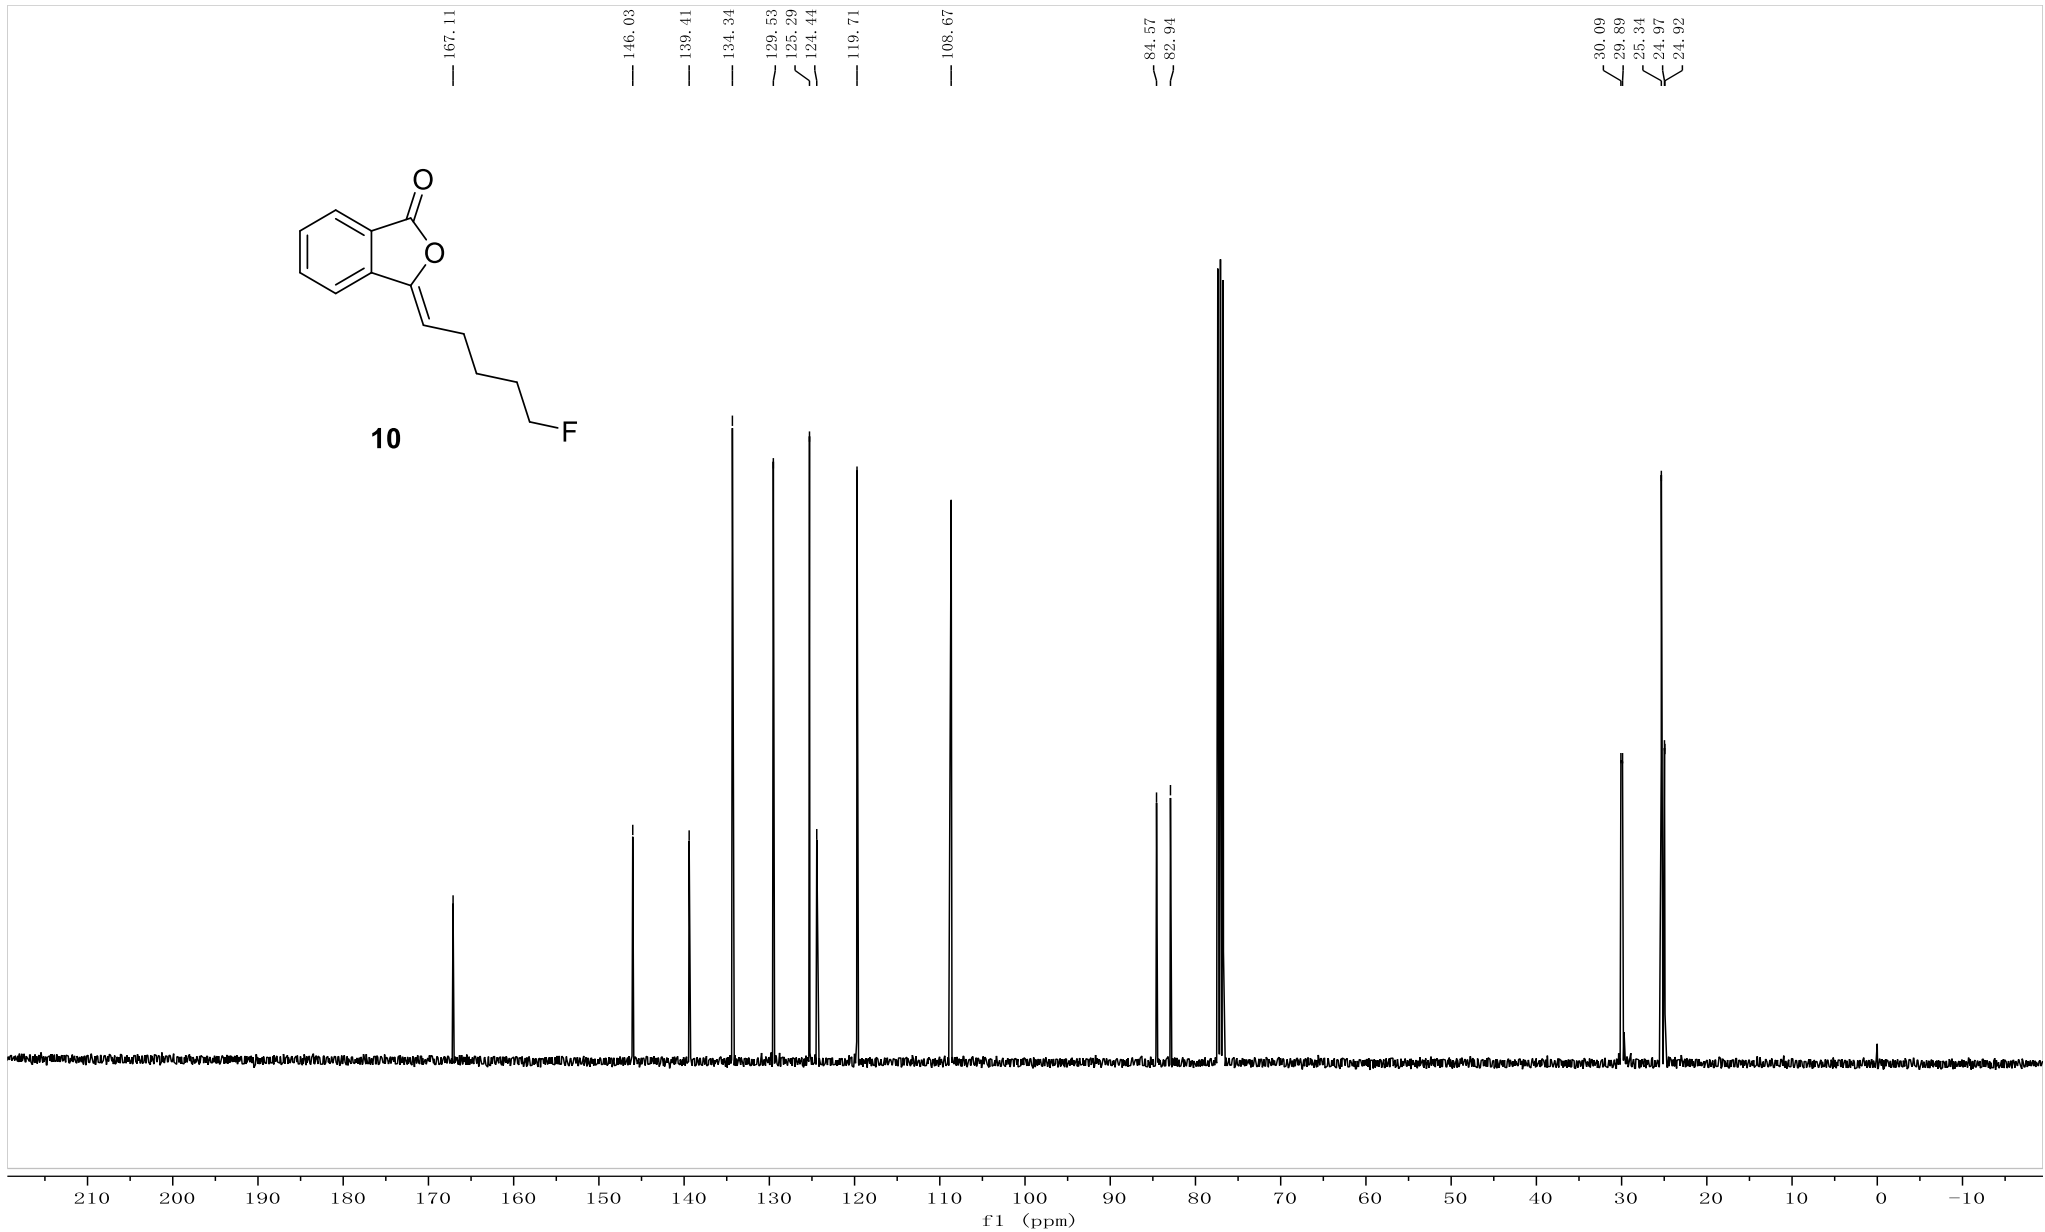

$^{19}\text{F}$  NMR-spectrum (471 MHz,  $\text{CDCl}_3$ ) of **10**

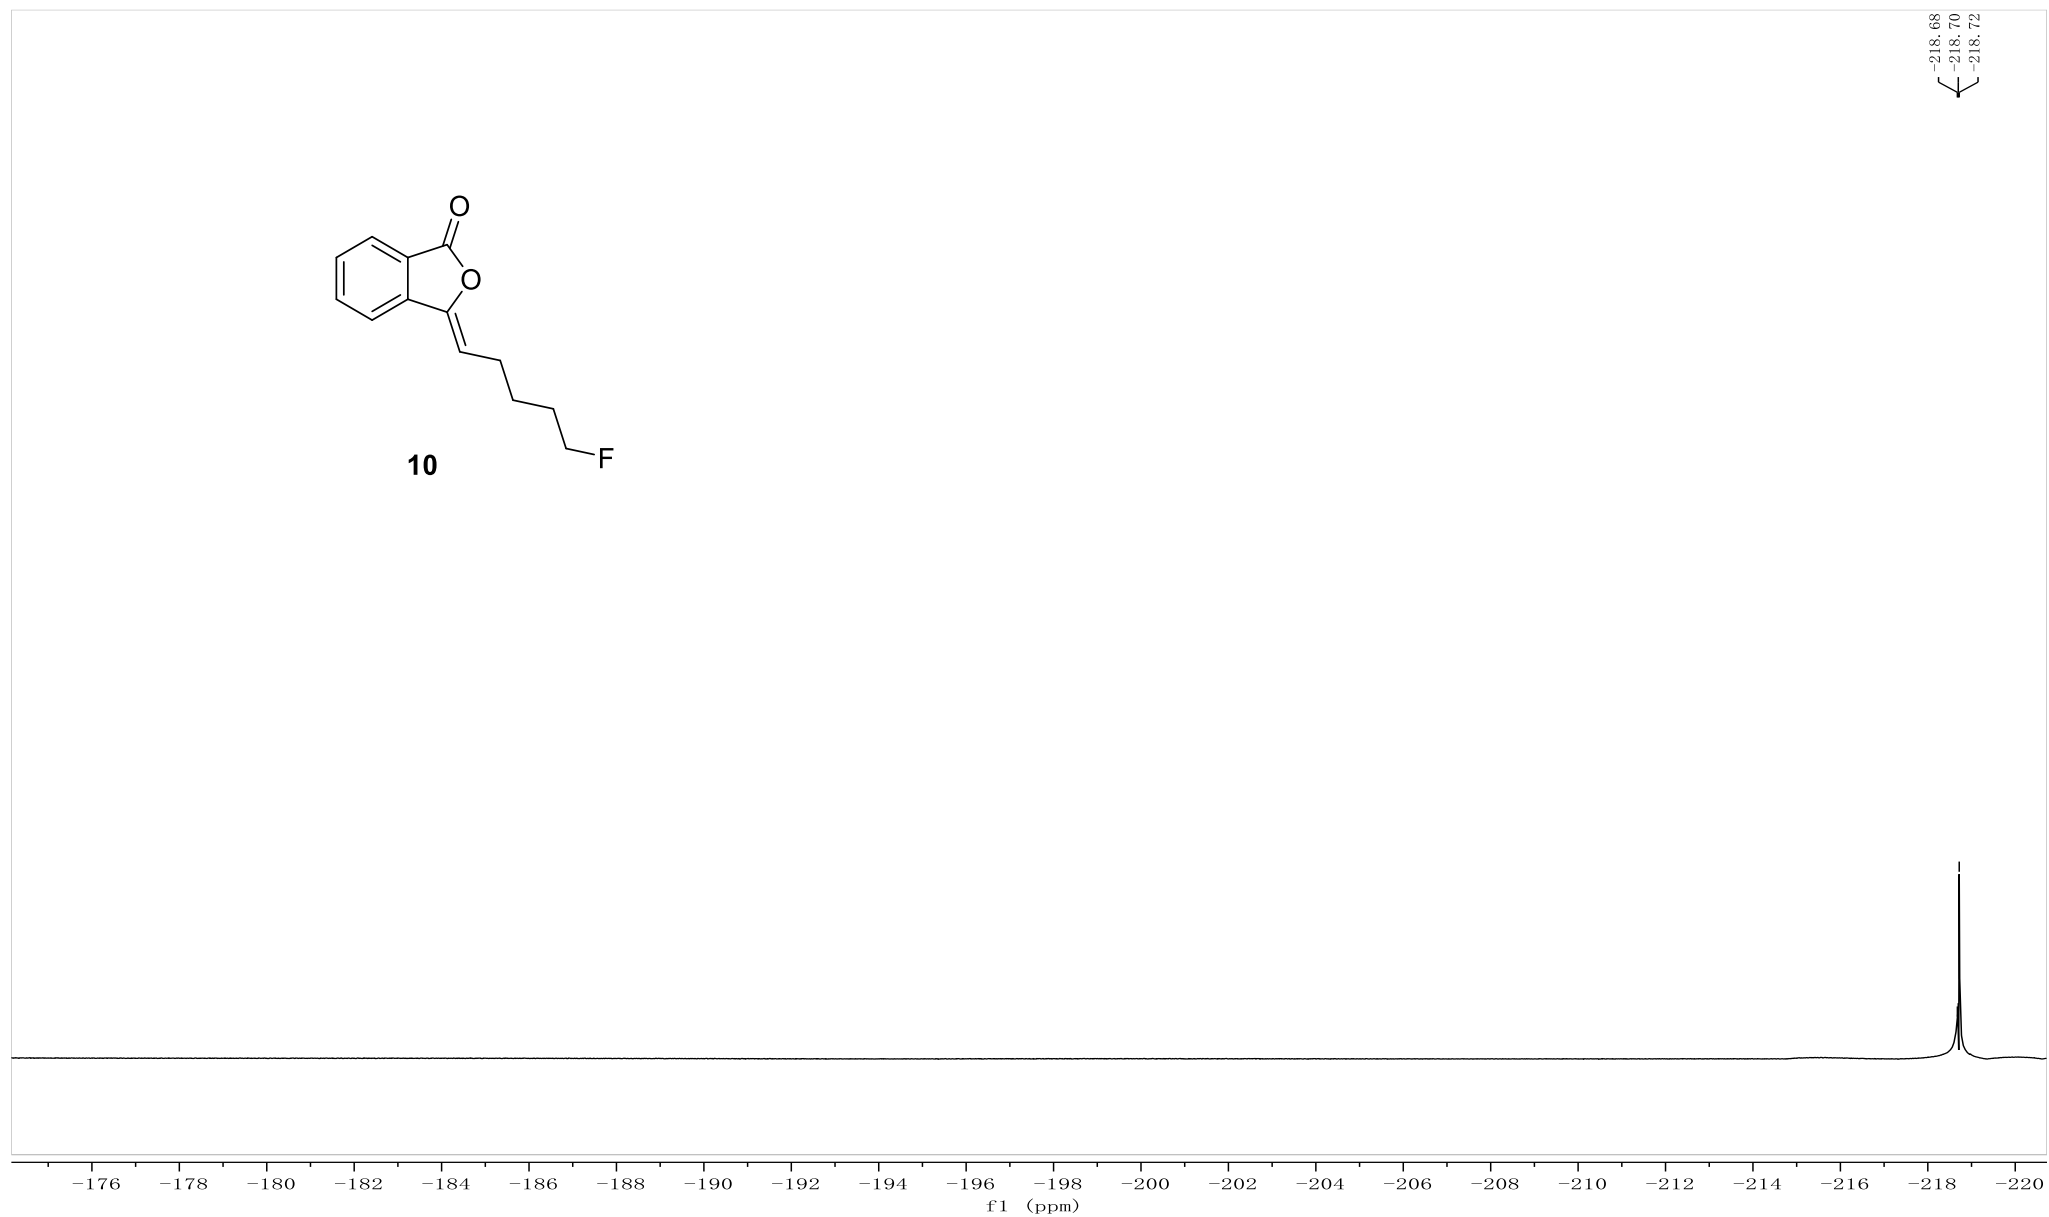

S187

<sup>1</sup>H NMR-spectrum (500 MHz, CDCl<sub>3</sub>) of **14**

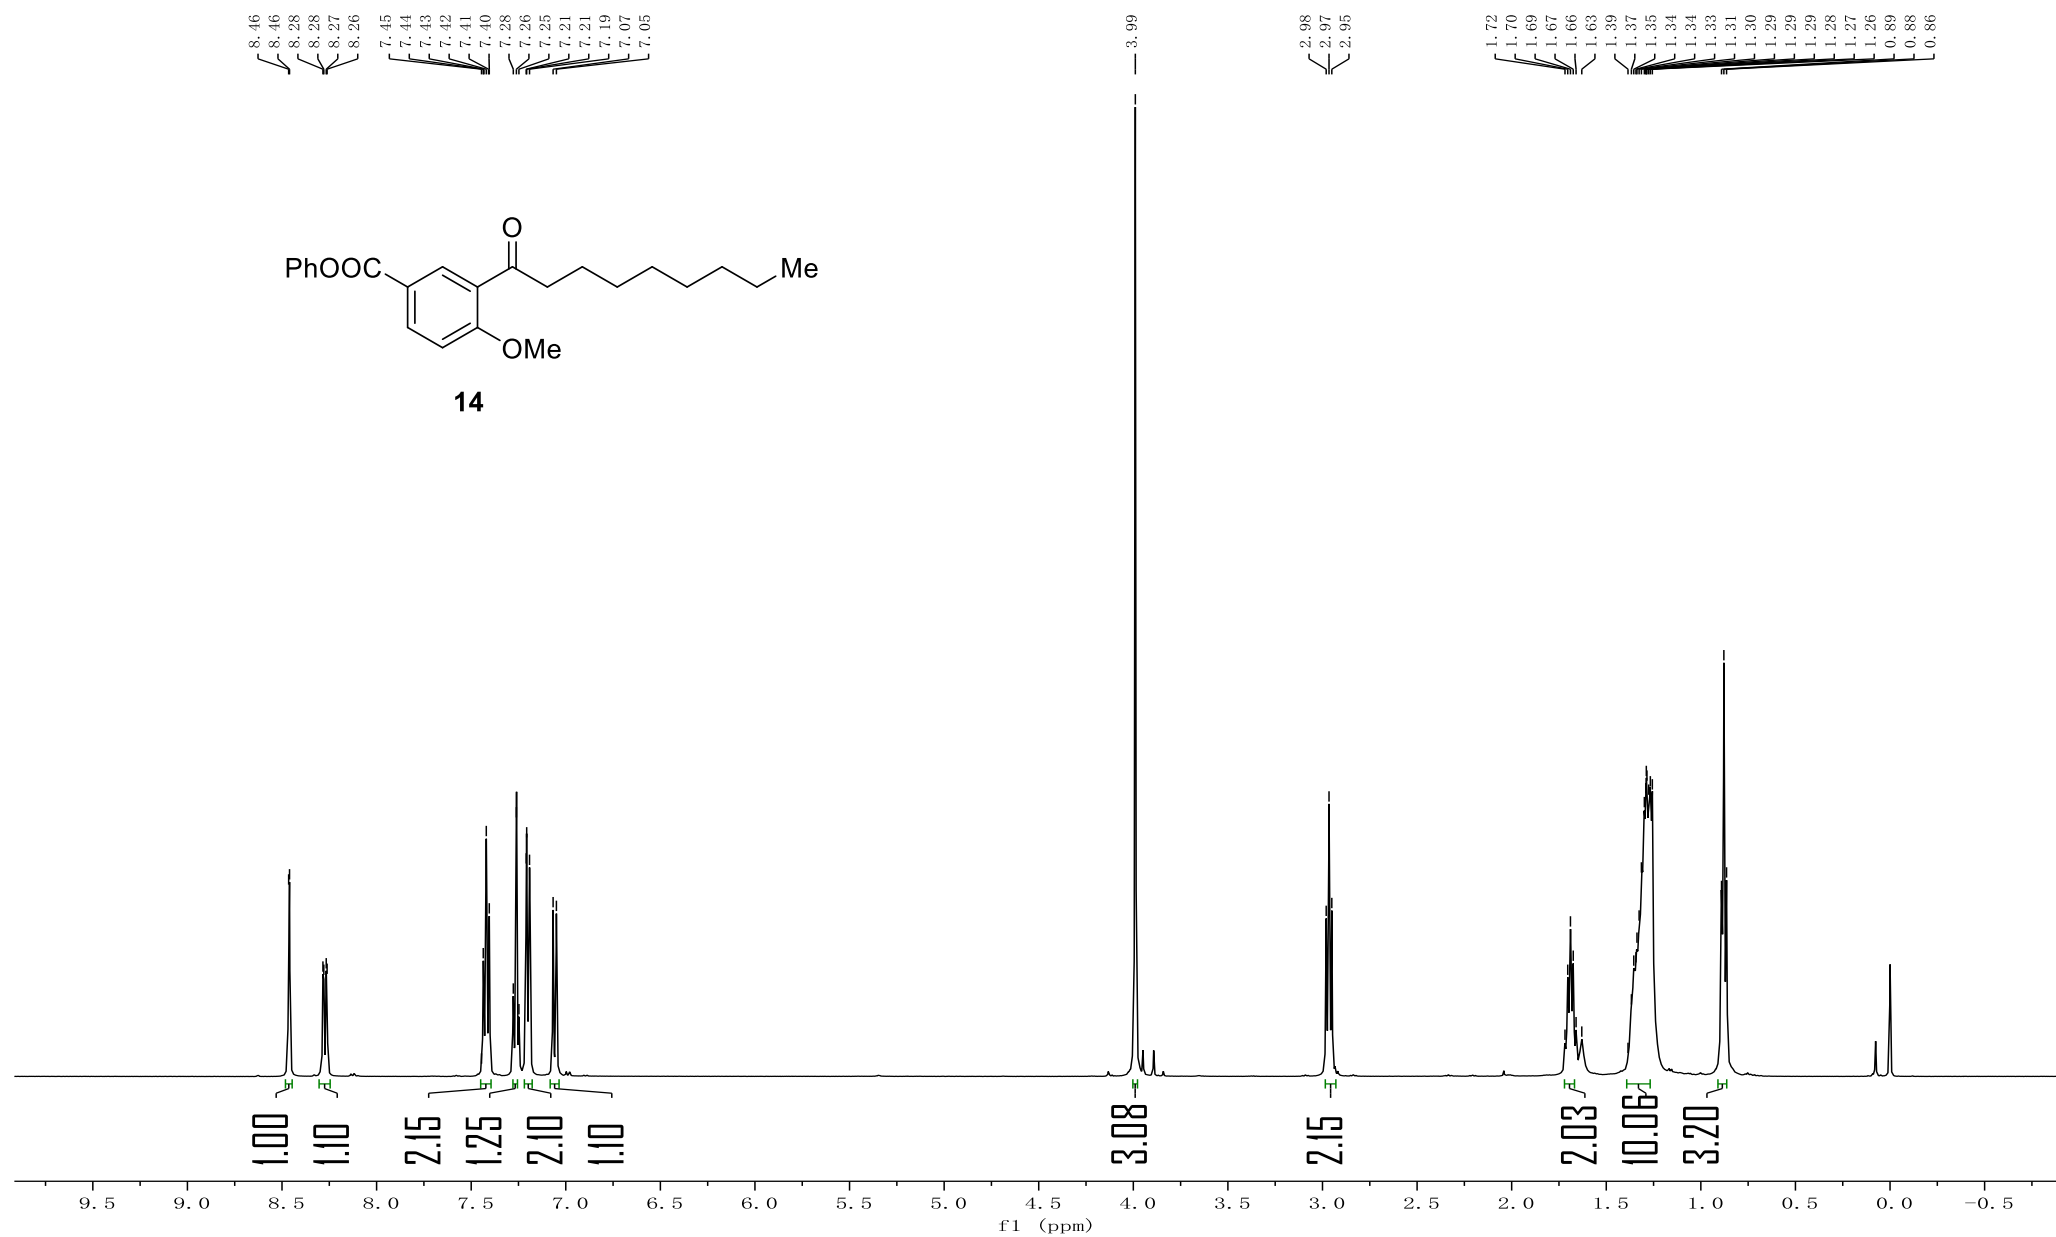



<sup>13</sup>C NMR-spectrum (126 MHz, CDCl<sub>3</sub>) of **14**

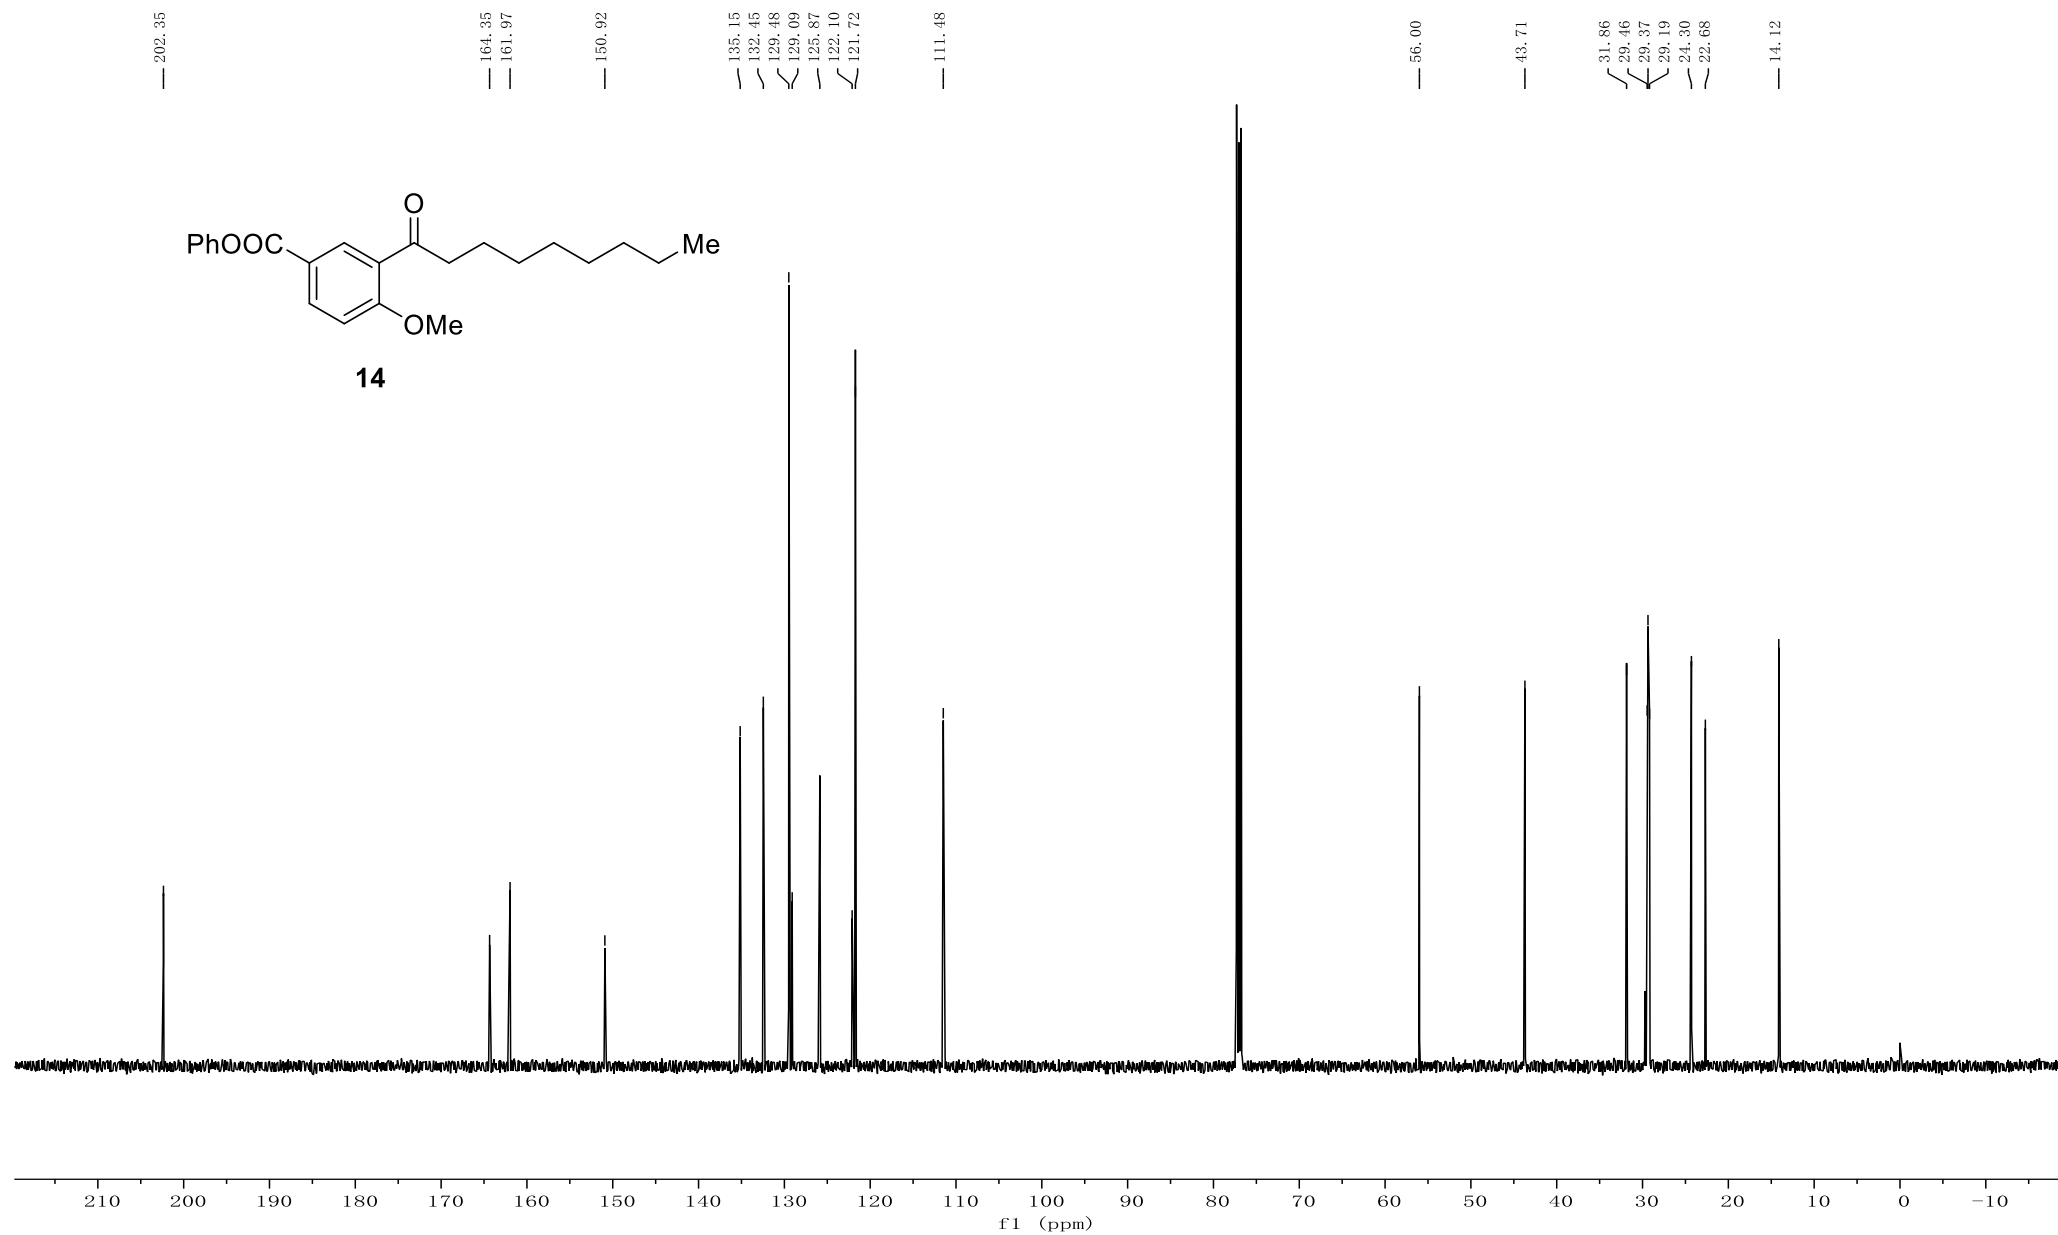

<sup>1</sup>H NMR-spectrum (400 MHz, CDCl<sub>3</sub>) of **11**

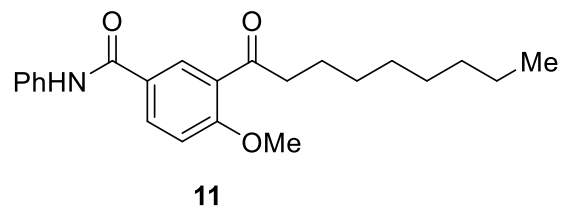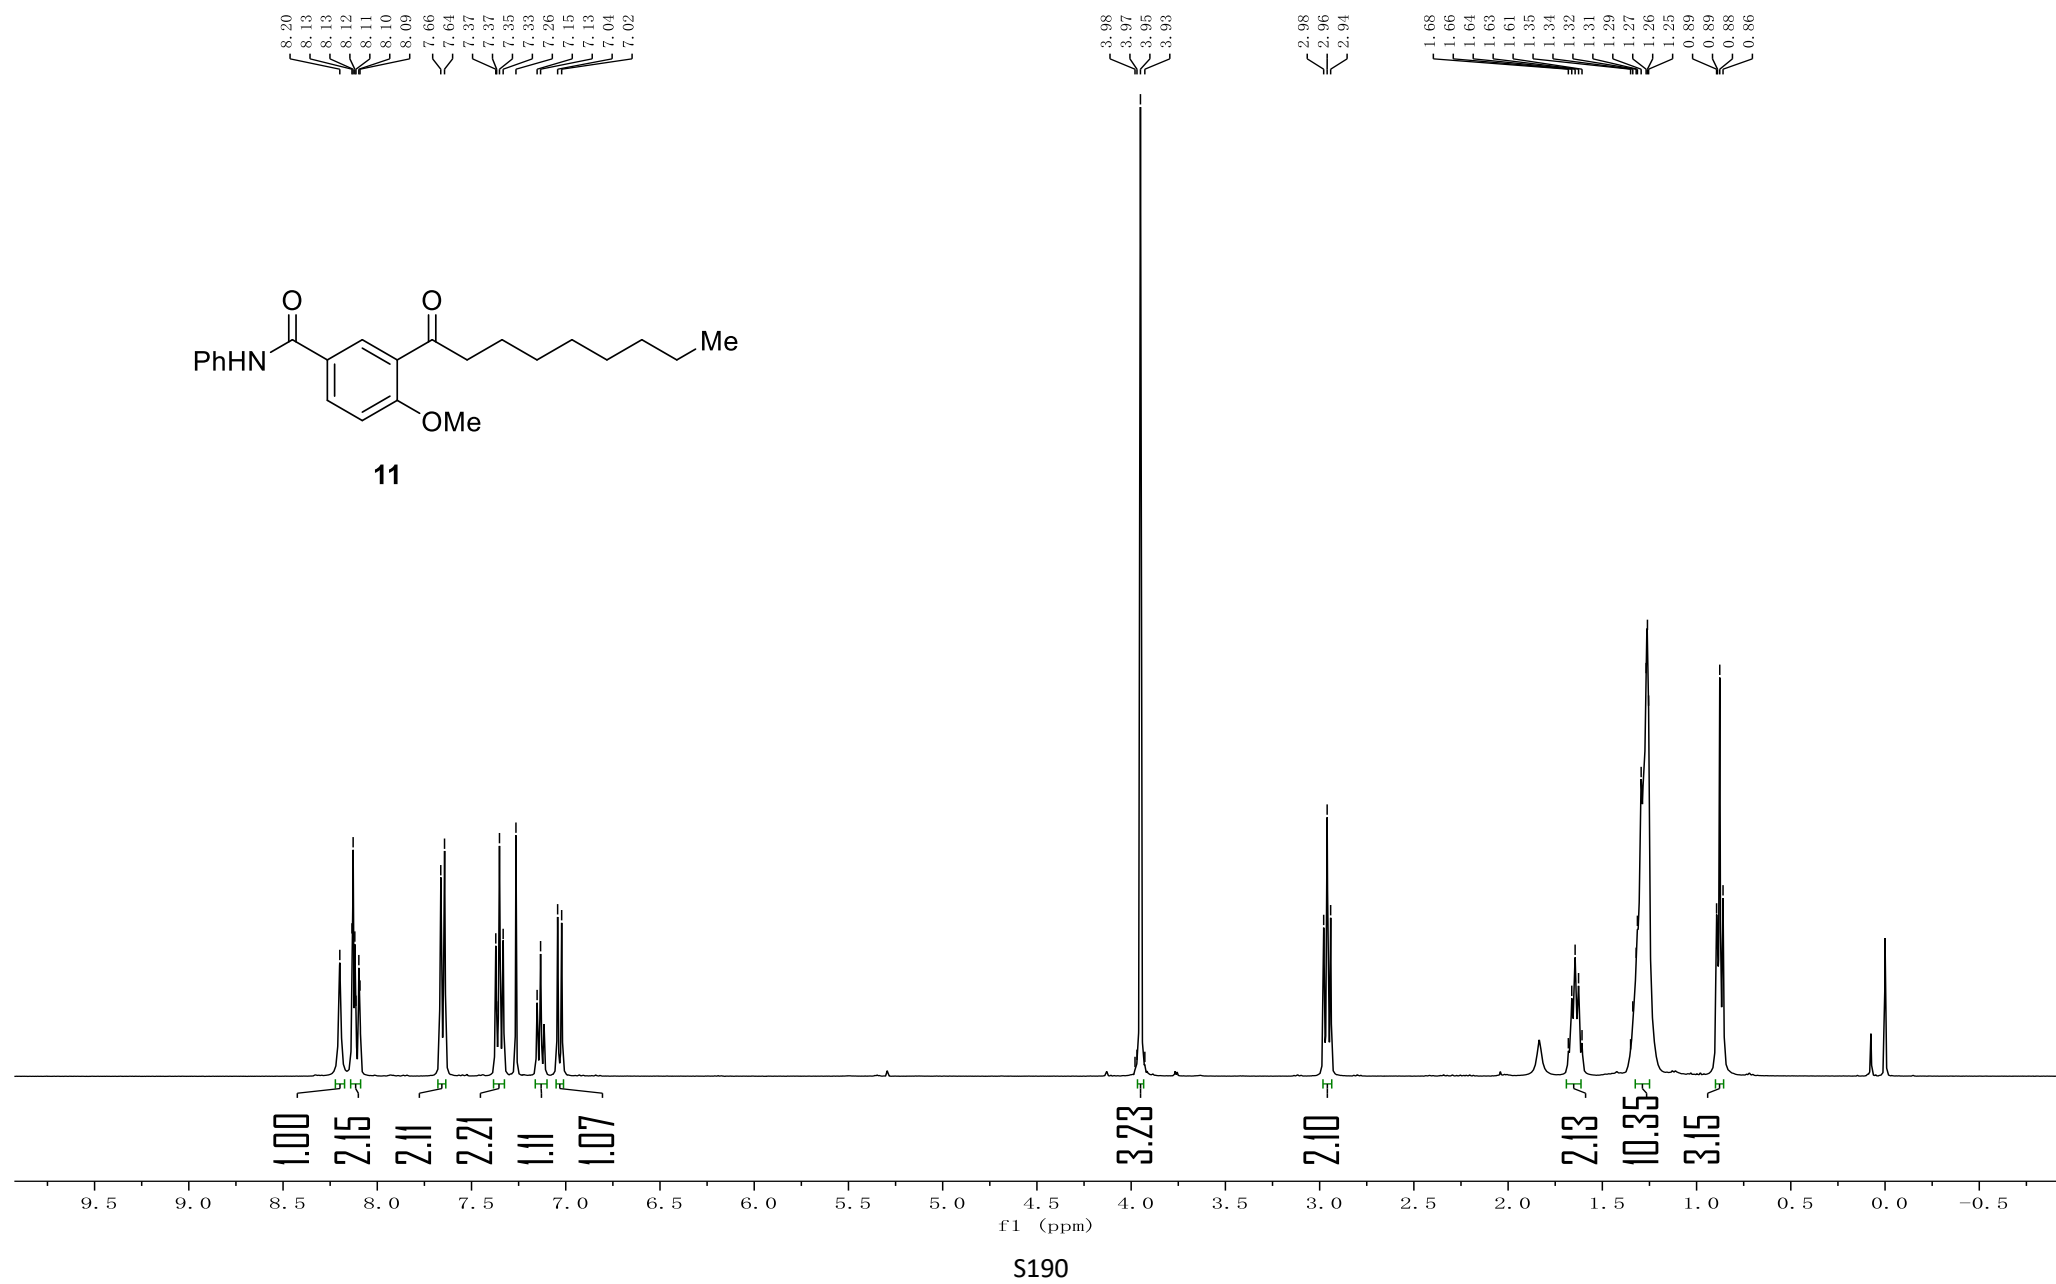

<sup>13</sup>C NMR-spectrum (126 MHz, CDCl<sub>3</sub>) of **11**

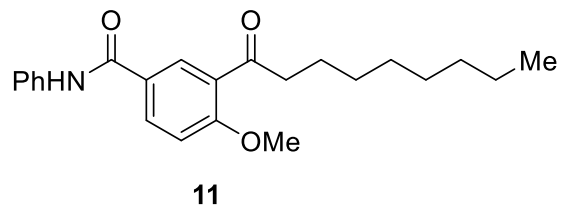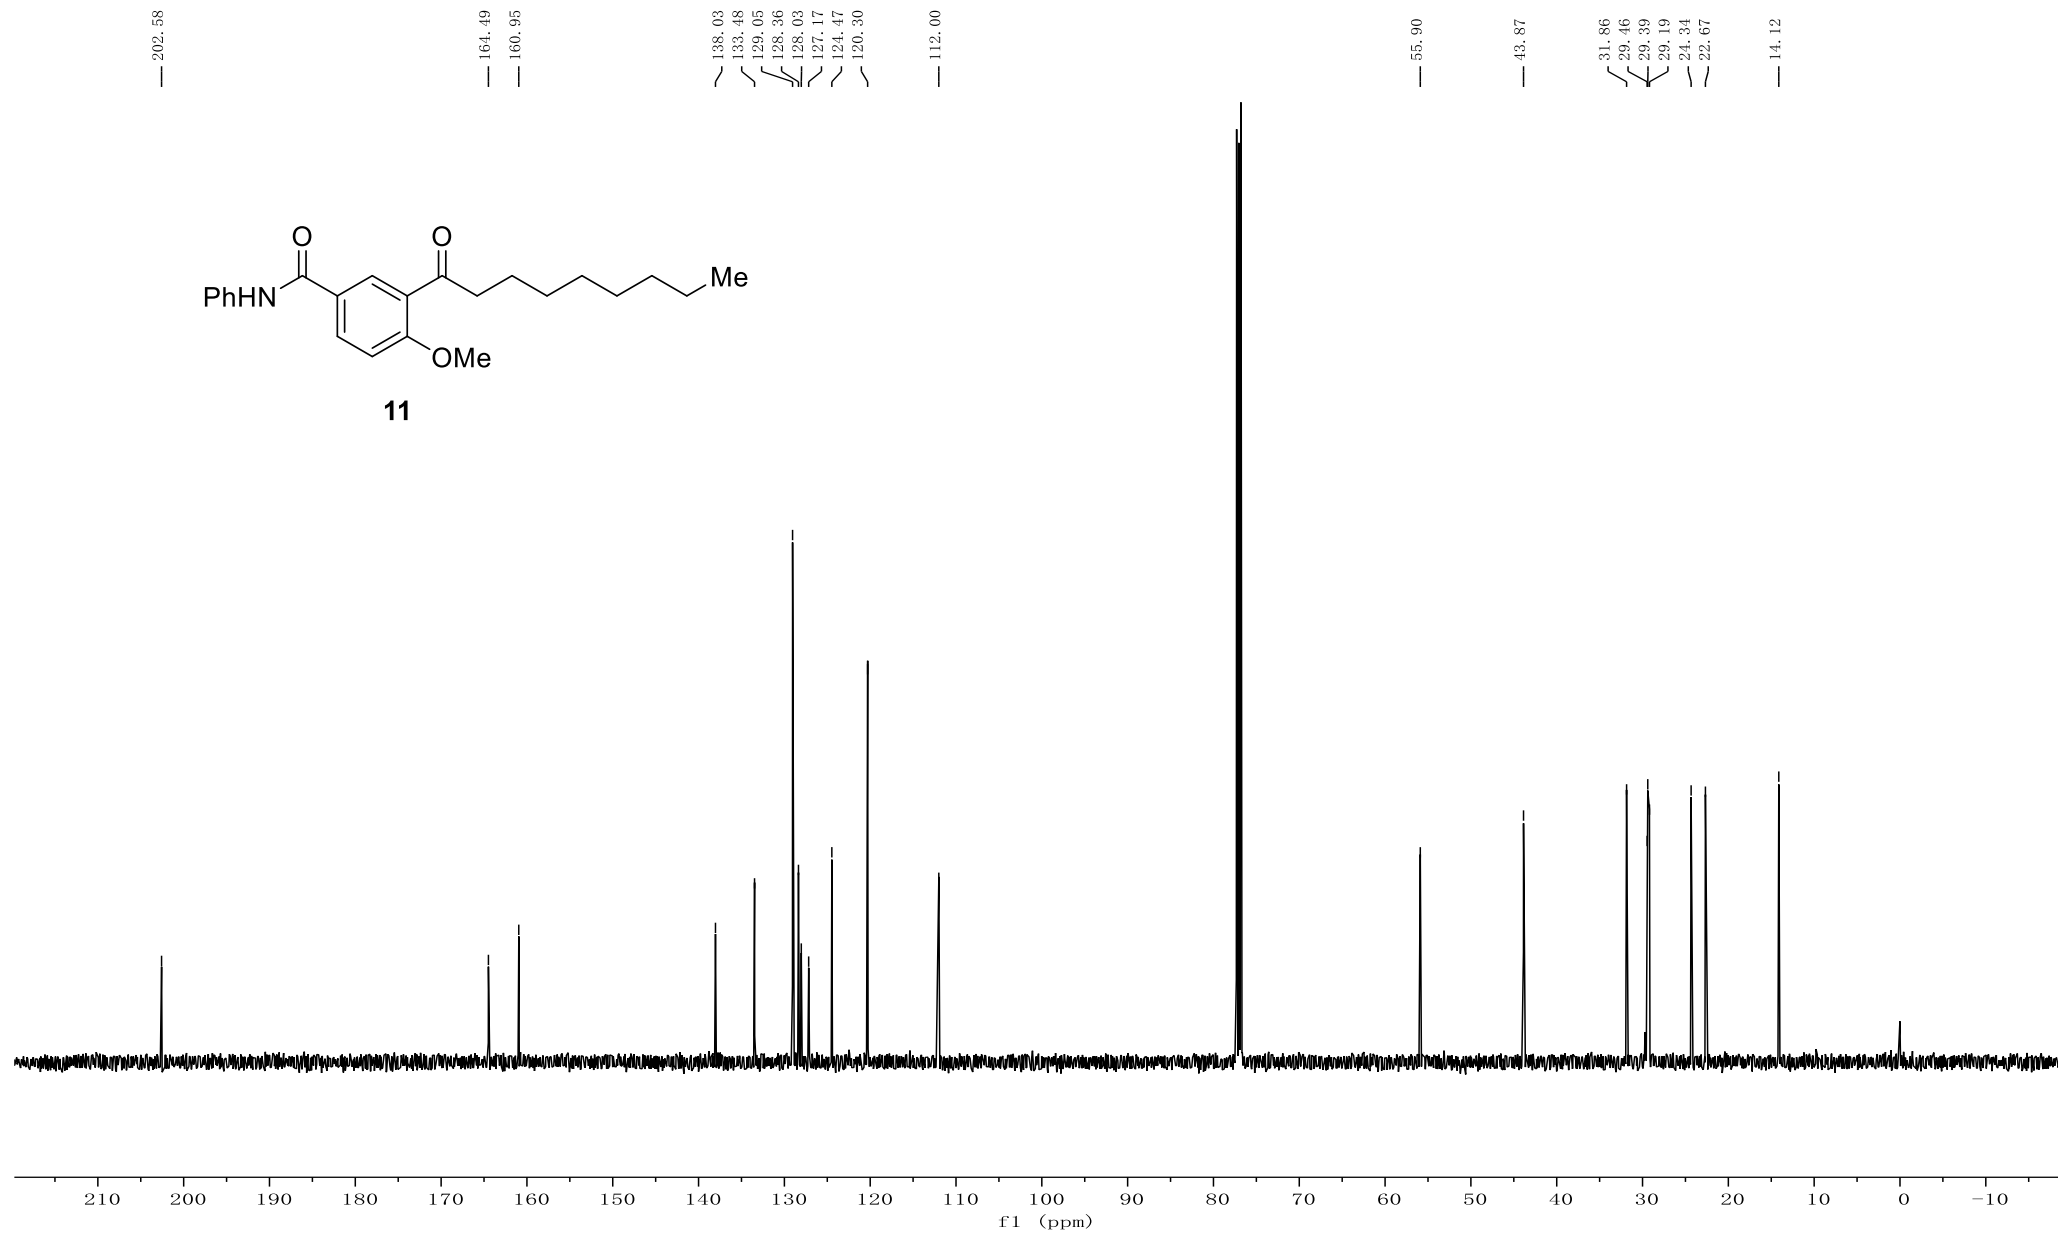

<sup>1</sup>H NMR-spectrum (400 MHz, CDCl<sub>3</sub>) of **12**

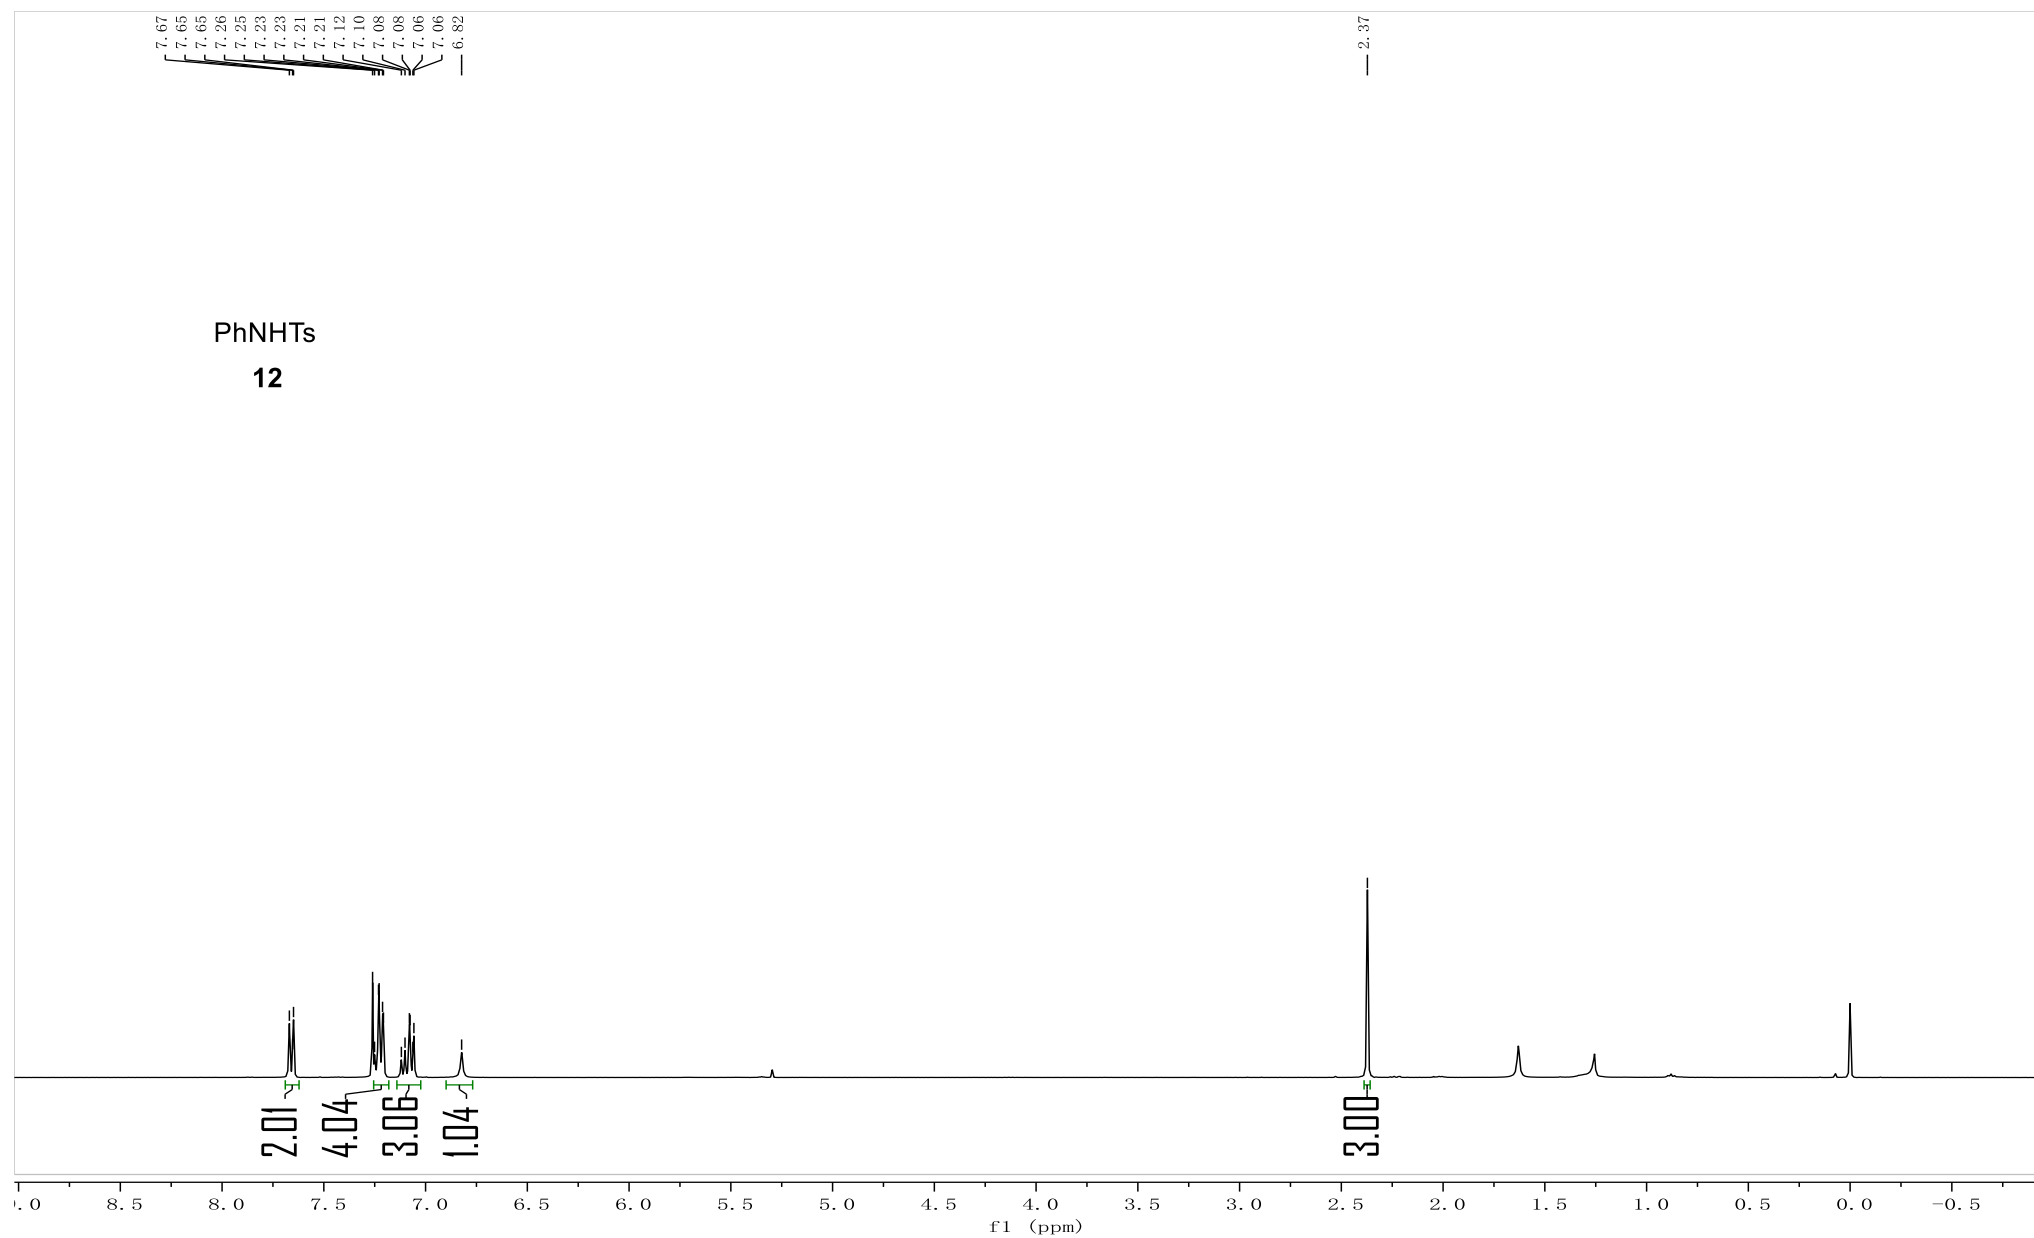

$^{13}\text{C}$  NMR-spectrum (101 MHz,  $\text{CDCl}_3$ ) of **12**

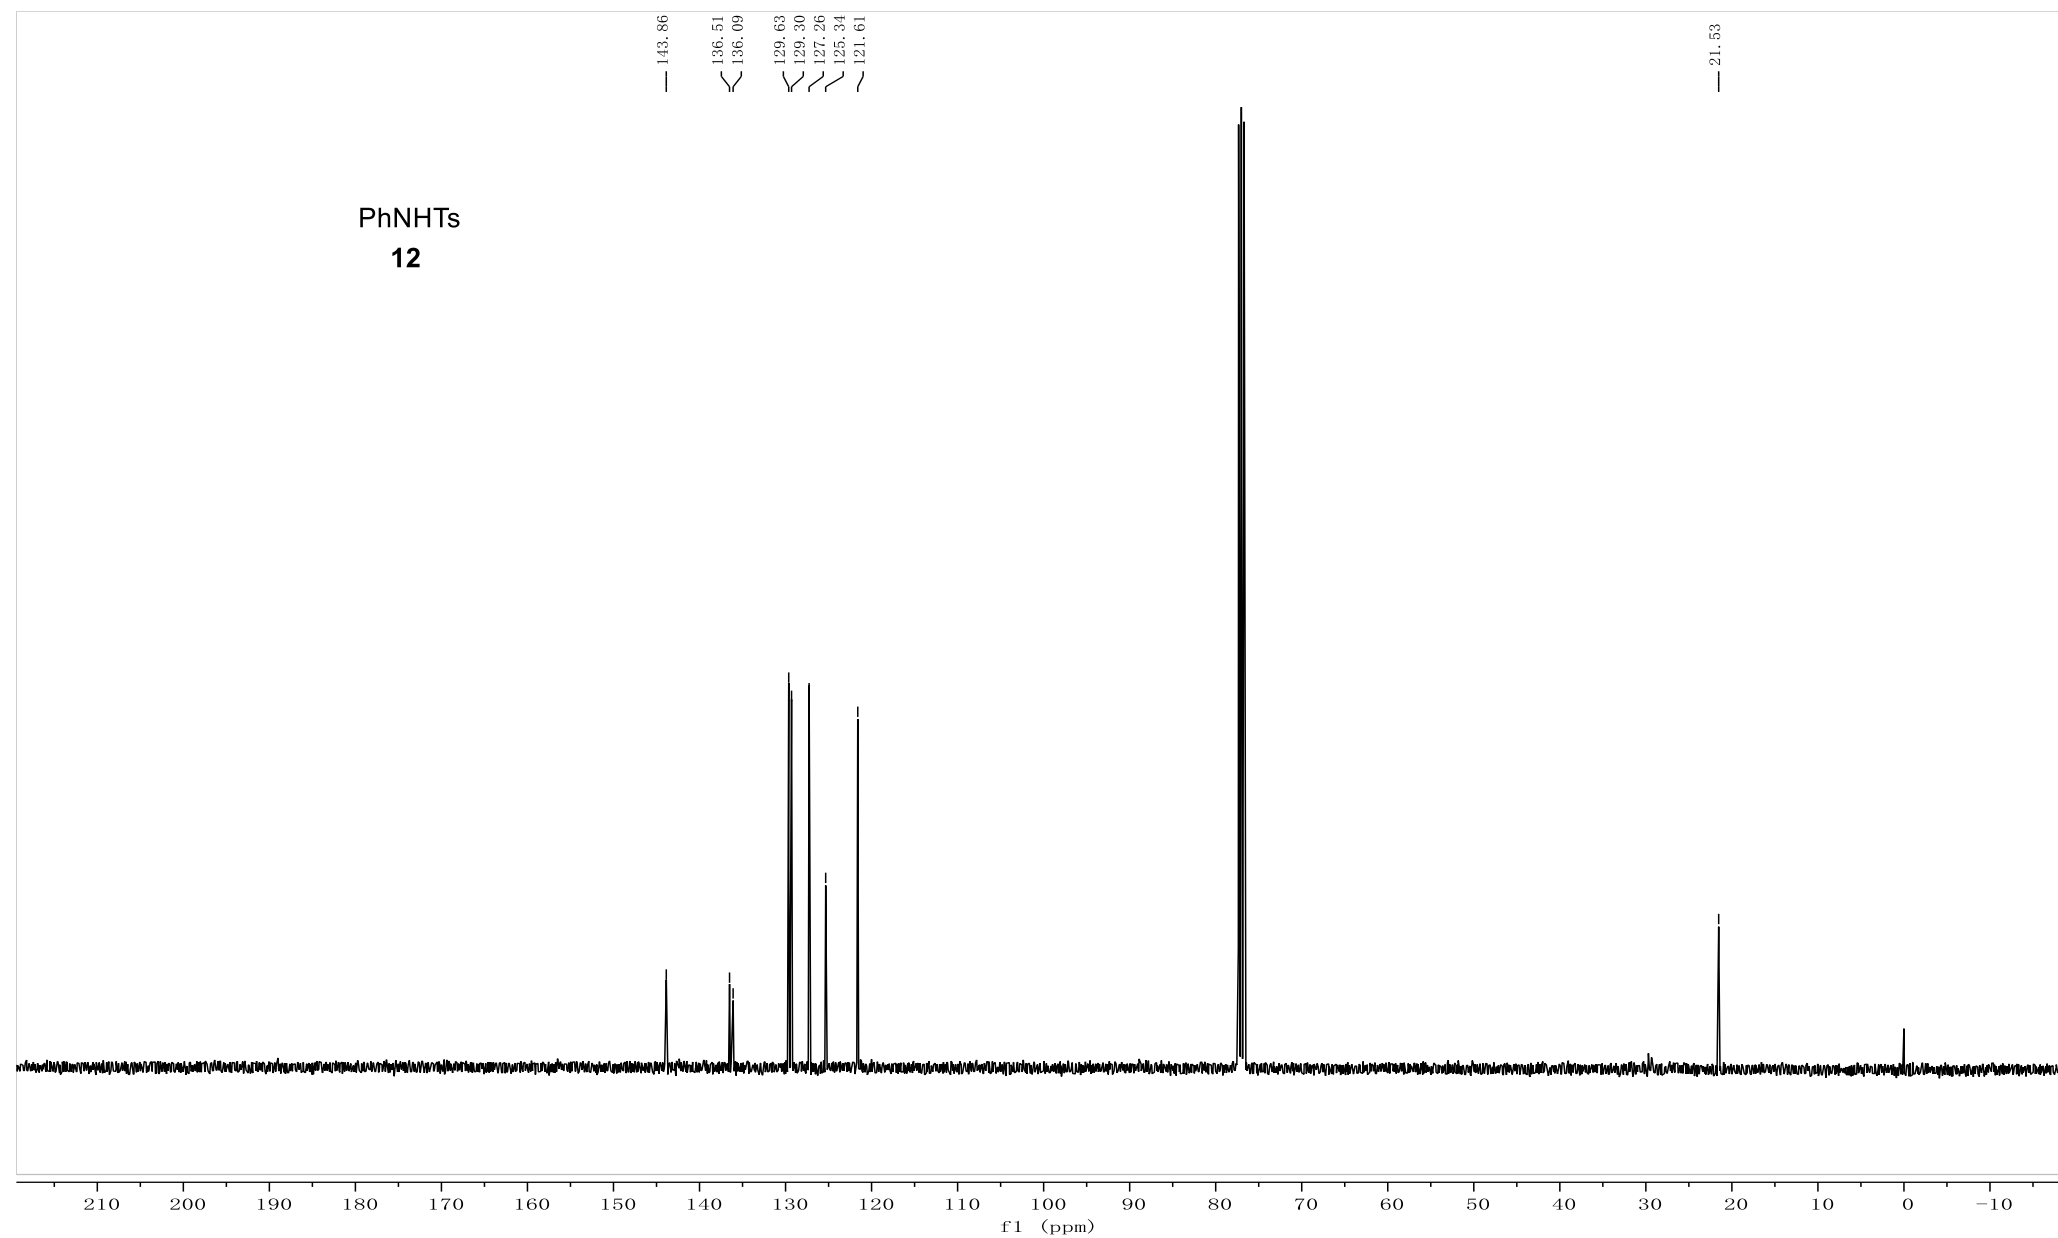

S193
